# Supplementary material for: Nuclear Receptor Subfamily 4A Signaling as a Key Disease Pathway of CD1c+ Dendritic Cell Dysregulation in Systemic Sclerosis
Source: PubMed Central journal article supplement — Arthritis Rheumatol. 2022 Dec 8;75(2):279–92. doi: 10.1002/art.42319 (PMC10108054; doi:10.1002/art.42319), 2022-12-08
Supplement: ART-75-279-s002.pdf [file ART-75-279-s002.pdf]

| ENSEMBL         | baseMean     | eaSSc_log2FoldChange | eaSSc_pvalue | ncSSc_log2FoldChange | ncSSc_pvalue | lcSSc_log2FoldChange | lcSSc_pvalue | dcSSc_log2FoldChange | dcSSc_pvalue | GeneSymbol |
|-----------------|--------------|----------------------|--------------|----------------------|--------------|----------------------|--------------|----------------------|--------------|------------|
| ENSG00000001561 | 1305.214227  | -0.1312927895        | 0.2847414610 | -0.0279621398        | 0.8191073579 | -0.009530866         | 9.378678e-01 | 0.322422675          | 8.058754e-03 | ENPP4      |
| ENSG00000001617 | 5.742197     | 0.2612117706         | 0.0106445498 | 0.2113367205         | 0.0380920992 | 0.028170515          | 7.811785e-01 | 0.166582358          | 1.002744e-01 | SEMA3F     |
| ENSG00000001629 | 1622.854329  | 0.0760551868         | 0.1232343512 | 0.0453338863         | 0.3636960409 | 0.116825590          | 1.919302e-02 | 0.086024237          | 8.877648e-02 | ANKIB1     |
| ENSG00000001631 | 676.657018   | 0.1645886350         | 0.0165747156 | 0.1150908566         | 0.0971052617 | 0.246276597          | 3.789138e-04 | 0.015013094          | 8.306391e-01 | KRIT1      |
| ENSG00000002016 | 237.588569   | 0.0568866429         | 0.5542641816 | 0.0799374868         | 0.4081264878 | 0.203695917          | 3.485076e-02 | 0.141905344          | 1.442208e-01 | RAD52      |
| ENSG00000002330 | 441.446682   | -0.0552446160        | 0.3720807581 | -0.0964546142        | 0.1232253059 | -0.178808568         | 4.403491e-03 | -0.161203993         | 1.100883e-02 | BAD        |
| ENSG00000002549 | 8322.524710  | 0.2351210281         | 0.0608922434 | 0.0336063963         | 0.7886308564 | 0.091810108          | 4.639249e-01 | 0.349621269          | 5.244197e-03 | LAP3       |
| ENSG00000002586 | 4130.238057  | -0.0376973285        | 0.6624452544 | -0.1768701726        | 0.0419201920 | -0.051808877         | 5.512065e-01 | 0.127506046          | 1.455806e-01 | CD99       |
| ENSG00000002834 | 13307.517232 | -0.0837415059        | 0.0560462741 | -0.0894043375        | 0.0437254715 | -0.052198862         | 2.390140e-01 | -0.006483698         | 8.852999e-01 | LASP1      |
| ENSG00000003249 | 4.058206     | 0.0121904915         | 0.8910436928 | 0.0631544041         | 0.4771967243 | 0.094939556          | 2.851694e-01 | 0.314372595          | 4.270736e-04 | DBNDD1     |
| ENSG00000003400 | 828.499876   | 0.2494138637         | 0.0283036298 | 0.1310369065         | 0.2502057007 | 0.226540255          | 4.680414e-02 | 0.353312586          | 1.974711e-03 | CASP10     |
| ENSG00000003402 | 9131.349180  | -0.0286033712        | 0.5405447232 | -0.0180328827        | 0.7027877636 | -0.069312066         | 1.425830e-01 | -0.121067563         | 1.153368e-02 | CFLAR      |
| ENSG00000003509 | 355.139713   | 0.0979181685         | 0.1805874142 | 0.1553804825         | 0.0348353953 | 0.156793035          | 3.335508e-02 | 0.001458443          | 9.844195e-01 | NDUFAF7    |
| ENSG00000003756 | 3331.452843  | 0.1729016019         | 0.0002560262 | 0.0855100017         | 0.0739016300 | 0.111012995          | 2.033927e-02 | 0.007306000          | 8.803329e-01 | RBM5       |
| ENSG00000004059 | 7769.042234  | -0.1421229750        | 0.0055802214 | -0.1232261006        | 0.0174442778 | -0.138880126         | 7.388162e-03 | -0.147777257         | 4.899362e-03 | ARF5       |
| ENSG00000004700 | 1037.427802  | 0.1706882137         | 0.0064118608 | 0.1627775450         | 0.0100286525 | 0.195080358          | 2.031702e-03 | 0.274908118          | 1.694180e-05 | RECQL      |
| ENSG00000004777 | 223.805562   | 0.0911629151         | 0.3745123335 | -0.0675314570        | 0.5128129637 | 0.084989587          | 4.096089e-01 | -0.240844256         | 2.049799e-02 | ARHGAP33   |
| ENSG00000004779 | 1303.687739  | -0.1322540832        | 0.0021598939 | -0.0435706601        | 0.3168768531 | -0.085755506         | 4.925118e-02 | -0.020860140         | 6.362961e-01 | NDUFAB1    |
| ENSG00000004866 | 570.919326   | -0.0469273407        | 0.4709743953 | 0.0278000551         | 0.6718345569 | -0.096067791         | 1.444105e-01 | -0.164120934         | 1.373401e-02 | ST7        |
| ENSG00000004897 | 1479.466079  | 0.1040450666         | 0.0439527826 | 0.0302617462         | 0.5625201750 | 0.049850460          | 3.402274e-01 | 0.062237058          | 2.395233e-01 | CDC27      |
| ENSG00000005020 | 4650.421403  | -0.0501551076        | 0.3304538827 | 0.0536175780         | 0.3031260793 | -0.033915060         | 5.150341e-01 | 0.116838691          | 2.676481e-02 | SKAP2      |
| ENSG00000005022 | 13785.733046 | -0.1066251904        | 0.0322983733 | -0.0621042366        | 0.2174334061 | -0.094056633         | 6.179652e-02 | -0.144081438         | 4.753972e-03 | SLC25A5    |
| ENSG00000005059 | 2072.161358  | 0.0295307958         | 0.6079938661 | 0.0512641481         | 0.3779944120 | 0.036105065          | 5.348198e-01 | 0.146285581          | 1.291669e-02 | MCUB       |
| ENSG00000005075 | 1079.206797  | -0.1047208007        | 0.0504430996 | -0.0674452671        | 0.2122639224 | -0.128394924         | 1.775204e-02 | -0.129486916         | 1.818196e-02 | POLR2J     |
| ENSG00000005100 | 610.864001   | -0.0585760866        | 0.3232219635 | -0.1219558023        | 0.0420761537 | 0.014771453          | 8.051053e-01 | -0.052127765         | 3.896425e-01 | DHX33      |
| ENSG00000005156 | 1098.816143  | 0.0828860817         | 0.2317591990 | 0.0742407182         | 0.2883132852 | 0.123472304          | 7.737896e-02 | 0.206145547          | 3.518923e-03 | LIG3       |
| ENSG00000005238 | 2371.372717  | 0.1899288779         | 0.0199892186 | 0.0469197134         | 0.5683651576 | 0.011605400          | 8.878096e-01 | 0.063747316          | 4.424531e-01 | FAM214B    |
| ENSG00000005249 | 1371.085148  | -0.2007438456        | 0.0313903629 | -0.1629566375        | 0.0822546118 | -0.085962443         | 3.592567e-01 | 0.063670713          | 4.999141e-01 | PRKAR2B    |
| ENSG00000005202 | 2266.818073  | 0.0459346538         | 0.2925770615 | 0.0356342435         | 0.4195716087 | 0.069655443          | 1.146383e-01 | 0.109267642          | 1.457434e-02 | MSL3       |
| ENSG00000005339 | 8308.582138  | 0.0078890336         | 0.8782629800 | -0.1172982170        | 0.0242949495 | -0.074248129         | 1.539349e-01 | -0.034471037         | 5.135000e-01 | CREBBP     |
| ENSG00000005448 | 336.797608   | -0.2644194839        | 0.0007553638 | -0.1721465505        | 0.0292515244 | -0.321152069         | 5.068901e-05 | -0.249309390         | 1.785878e-03 | WDR54      |
| ENSG00000005700 | 2498.404738  | 0.0555728918         | 0.2652518679 | 0.1107995677         | 0.0279332199 | 0.145699423          | 3.846129e-03 | 0.137899573          | 6.932564e-03 | IBTK       |
| ENSG00000005882 | 463.310179   | -0.0633920363        | 0.4497191186 | -0.1801990429        | 0.0330609521 | -0.102289193         | 2.261367e-01 | -0.067055793         | 4.311362e-01 | PDK2       |
| ENSG00000005884 | 11.110314    | -0.0084756067        | 0.9457785394 | 0.0099665935         | 0.9360329245 | 0.360036781          | 3.875518e-03 | 0.229244642          | 6.434418e-02 | ITGA3      |
| ENSG00000005889 | 2007.511013  | 0.2053398252         | 0.0139280061 | 0.07111795113        | 0.3973104311 | 0.011824762          | 8.882021e-01 | 0.086752345          | 3.066383e-01 | ZFX        |
| ENSG00000005961 | 74.302688    | -0.1559609543        | 0.1989709490 | -0.2636817107        | 0.0292354368 | -0.108996453         | 3.675637e-01 | -0.216679699         | 7.184792e-02 | ITGA2B     |
| ENSG00000006007 | 1755.218366  | -0.1503214877        | 0.0071764274 | -0.1858282005        | 0.0010105640 | -0.097604594         | 8.407165e-02 | -0.127121606         | 2.622091e-02 | GDE1       |
| ENSG00000006016 | 66.262525    | 0.2462023719         | 0.0312780453 | 0.2153294962         | 0.0601805749 | 0.195869162          | 8.767775e-02 | 0.099779694          | 3.859223e-01 | CRLF1      |
| ENSG00000006062 | 4151.701308  | -0.0871735619        | 0.2077922222 | -0.2350276677        | 0.0007651031 | -0.161013147         | 2.113539e-02 | -0.310874265         | 1.073160e-05 | MAP3K14    |
| ENSG00000006118 | 142.213234   | 0.3206566822         | 0.0087381699 | 0.2367279270         | 0.0529614238 | 0.259883357          | 3.363934e-02 | 0.008673377          | 9.435487e-01 | TMEM132A   |
| ENSG00000006194 | 1351.975704  | 0.0282315226         | 0.6342188606 | -0.0217568377        | 0.7166979849 | -0.213174062         | 3.896027e-04 | -0.102059072         | 9.293136e-02 | ZNF263     |
| ENSG00000006327 | 144.089148   | 0.2970125537         | 0.0218504576 | 0.1148862187         | 0.3732735201 | -0.188957685         | 1.429714e-01 | 0.036615297          | 7.755347e-01 | TNFRSF12A  |
| ENSG00000006459 | 6725.649428  | -0.0119791976        | 0.8695304636 | -0.0863586299        | 0.2403553568 | -0.037157126         | 6.134327e-01 | -0.167763035         | 2.400150e-02 | KDM7A      |
| ENSG00000006555 | 16.757362    | -0.0453984642        | 0.7271671579 | -0.2575044215        | 0.0467446889 | 0.154614889          | 2.335446e-01 | 0.130260088          | 3.131640e-01 | TTC22      |
| ENSG00000006576 | 912.319379   | 0.0818978480         | 0.2315717001 | 0.0587476715         | 0.3950932659 | 0.140374077          | 4.206692e-02 | 0.007170896          | 9.182863e-01 | PTHF2      |
| ENSG00000006638 | 4.767097     | -0.1538780248        | 0.0542248157 | -0.1985028203        | 0.0127906569 | -0.104368557         | 1.909625e-01 | -0.132515411         | 9.609192e-02 | TBXA2R     |
| ENSG00000006704 | 26.709413    | 0.0939090517         | 0.4629432769 | 0.1184812332         | 0.3526885974 | 0.072744578          | 5.681112e-01 | -0.268332047         | 3.403900e-02 | GTTF2IRD1  |
| ENSG00000006712 | 1211.819716  | 0.1450375125         | 0.0195394077 | 0.1036000099         | 0.0986610081 | 0.041365504          | 5.100800e-01 | -0.007077649         | 9.113402e-01 | PAF1       |
| ENSG00000006715 | 2269.217828  | 0.0045387809         | 0.9375590151 | 0.1310683063         | 0.0249990914 | 0.111507525          | 5.662161e-02 | 0.135883293          | 2.174671e-02 | VPS41      |
| ENSG00000006740 | 5.437319     | 0.0006915197         | 0.9949651707 | 0.0986255151         | 0.3680745216 | 0.225301939          | 4.017902e-02 | 0.060721012          | 5.771154e-01 | ARHGAP44   |
| ENSG00000006744 | 1864.552086  | 0.0427004211         | 0.3868663215 | -0.0088458403        | 0.8593387400 | 0.067224486          | 1.778770e-01 | 0.145903717          | 3.865776e-03 | ELAC2      |
| ENSG00000006837 | 6.190637     | 0.2750167616         | 0.0251301369 | 0.2075846422         | 0.0892131657 | 0.193104782          | 1.134252e-01 | 0.213706595          | 7.883862e-02 | CDKL3      |
| ENSG00000007080 | 1129.416224  | -0.0893128999        | 0.1511801213 | -0.0908057844        | 0.1483048110 | -0.154330675         | 1.412500e-02 | -0.046332692         | 4.659966e-01 | CCDC124    |
| ENSG00000007168 | 3629.699923  | 0.1150286079         | 0.0267691188 | 0.0984995966         | 0.0606256277 | 0.068651720          | 1.911406e-01 | 0.095978888          | 7.116285e-02 | PAFAH1B1   |
| ENSG00000007174 | 1.138284     | 0.0008458928         | 0.9882373027 | 0.1243519855         | 0.0308728743 | 0.027941668          | 6.259267e-01 | 0.110930070          | 5.360345e-02 | DNAH9      |
| ENSG00000007255 | 1018.758493  | -0.1912124688        | 0.0012900757 | -0.1292472513        | 0.0311211126 | -0.194775820         | 1.179334e-03 | -0.199908876         | 1.000616e-03 | TRAPP6A    |
| ENSG00000007264 | 185.882508   | 0.1782098417         | 0.1567474523 | 0.0027043943         | 0.9828492887 | 0.064571741          | 6.077392e-01 | 0.323885480          | 9.894962e-03 | MATK       |
| ENSG00000007312 | 518.987461   | 0.1170285599         | 0.3555613452 | 0.2528599814         | 0.0456649591 | 0.200264086          | 1.134960e-01 | 0.278889613          | 2.730527e-02 | CD79B      |
| ENSG00000007314 | 1.986139     | 0.0173129501         | 0.8321388598 | -0.0099647777        | 0.9026653319 | 0.005931610          | 9.419105e-01 | 0.160478011          | 4.967943e-02 | SCN4A      |
| ENSG00000007372 | 66.932102    | 0.1136937759         | 0.3362654631 | 0.2408827900         | 0.0414016873 | 0.033777021          | 7.756766e-01 | 0.304204724          | 1.006603e-02 | PAX6       |
| ENSG00000007376 | 1301.060260  | -0.0899145752        | 0.1654097899 | -0.1440228563        | 0.0277945087 | -0.146591048         | 2.518143e-02 | -0.122542155         | 6.419191e-02 | RPUSD1     |
| ENSG00000007384 | 6.861386     | 0.1158037478         | 0.3474352737 | 0.2543248647         | 0.0389176433 | 0.088548259          | 4.703496e-01 | -0.013376604         | 9.125747e-01 | RHBDF1     |
| ENSG00000007520 | 1085.313993  | -0.1135882929        | 0.0767640379 | -0.0891317095        | 0.1687957961 | -0.190847093         | 3.260252e-03 | -0.022056545         | 7.362698e-01 | TSR3       |
| ENSG00000007545 | 752.837481   | 0.0199652097         | 0.6978060094 | -0.0857595171        | 0.0999095692 | 0.036391840          | 4.841620e-01 | 0.129836946          | 1.401531e-02 | CRAMP1     |
| ENSG00000008324 | 475.554623   | -0.1336811385        | 0.0497741218 | -0.0088384958        | 0.8974925351 | -0.064143311         | 3.507010e-01 | -0.166988982         | 1.633167e-02 | SS18L2     |
| ENSG00000008438 | 2.619711     | 0.0702723643         | 0.3949704384 | 0.0800323190         | 0.3317299121 | 0.061223746          | 4.569167e-01 | 0.187864587          | 2.291866e-02 | PGLYRP1    |
| ENSG00000008516 | 620.503491   | -0.2691958875        | 0.0404224568 | -0.1359881320        | 0.2992496535 | 0.036586571          | 7.800277e-01 | -0.186908112         | 1.522932e-01 | MMP25      |
| ENSG00000008838 | 2471.427748  | -0.0947487673        | 0.0280306158 | 0.0088330293         | 0.8393603625 | -0.004635573         | 9.153296e-01 | 0.019744722          | 6.549313e-01 | MED24      |
| ENSG00000008869 | 3812.182572  |                      |              |                      |              |                      |              |                      |              |            |

| ENSEMBL         | baseMean     | eaSSc_log2FoldChange | eaSSc_pvalue | ncSSc_log2FoldChange | ncSSc_pvalue | lcSSc_log2FoldChange | lcSSc_pvalue | dcSSc_log2FoldChange | dcSSc_pvalue | GeneSymbol |
|-----------------|--------------|----------------------|--------------|----------------------|--------------|----------------------|--------------|----------------------|--------------|------------|
| ENSG00000013561 | 6.453969e+02 | -0.006303009         | 0.9302456100 | 0.215896619          | 2.868022e-03 | 0.155119734          | 3.238556e-02 | 0.251495865          | 5.861509e-04 | RNF14      |
| ENSG00000013563 | 1.394273e+03 | 0.015146454          | 0.7982182044 | -0.099969003         | 9.506011e-02 | -0.150139420         | 1.225210e-02 | -0.055420126         | 3.607040e-01 | DNASE1L1   |
| ENSG00000013583 | 8.710673e+02 | -0.045871133         | 0.4589416023 | -0.075119033         | 2.297819e-01 | -0.171915150         | 6.085779e-03 | -0.117517246         | 6.364846e-02 | HEBP1      |
| ENSG00000014123 | 1.401293e+03 | 0.084309407          | 0.1619702839 | 0.079966046          | 1.891085e-01 | 0.123957511          | 4.177655e-02 | 0.098042358          | 1.115457e-01 | UFL1       |
| ENSG00000014216 | 6.340807e+03 | 0.014997717          | 0.7927963445 | 0.013047689          | 8.210413e-01 | 0.017009318          | 7.680984e-01 | 0.169692586          | 3.657635e-03 | CAPN1      |
| ENSG00000014641 | 2.569245e+03 | -0.073114850         | 0.0903397917 | 0.088700669          | 4.188713e-02 | -0.012671046         | 7.716567e-01 | -0.010341533         | 8.151998e-01 | MDH1       |
| ENSG00000015285 | 8.586109e+03 | 0.022626390          | 0.7009645275 | 0.057182603          | 3.366061e-01 | 0.021992439          | 7.117435e-01 | 0.138724032          | 2.128892e-02 | WAS        |
| ENSG00000015475 | 5.218165e+03 | 0.026883182          | 0.7105274109 | 0.063547585          | 3.843380e-01 | -0.063536902         | 3.845373e-01 | -0.181405554         | 1.401540e-02 | BID        |
| ENSG00000016391 | 2.713296e+00 | 0.080285633          | 0.2666203686 | 0.089074728          | 2.173162e-01 | 0.224706325          | 1.901515e-03 | 0.003133619          | 9.652220e-01 | CHDH       |
| ENSG00000017260 | 1.848541e+03 | 0.045206810          | 0.3158811720 | 0.072421866          | 1.120045e-01 | 0.110267010          | 1.553442e-02 | 0.084120714          | 6.857671e-02 | ATP2C1     |
| ENSG00000017483 | 8.548286e+01 | 0.277235201          | 0.0307377147 | 0.218950110          | 8.752719e-02 | 0.190801901          | 1.366060e-01 | 0.060808712          | 2.043004e-06 | SLC38A5    |
| ENSG00000018408 | 4.243915e+00 | -0.065102876         | 0.5381437809 | 0.203791497          | 5.495159e-02 | -0.215123761         | 3.982881e-02 | 0.023866984          | 8.209119e-01 | WWTR1      |
| ENSG00000018510 | 2.357481e+03 | 0.016450545          | 0.7451415772 | 0.002303620          | 9.640881e-01 | 0.090319192          | 7.739609e-02 | 0.127806851          | 1.360416e-02 | AGPS       |
| ENSG00000018625 | 4.991001e+01 | -0.067544891         | 0.5738846450 | -0.136537933         | 2.537750e-01 | -0.159733942         | 1.817586e-01 | -0.282751683         | 1.752951e-02 | ATP1A2     |
| ENSG00000018699 | 5.955739e+02 | 0.066830364          | 0.3414833727 | 0.024815775          | 7.262917e-01 | 0.039397458          | 5.785155e-01 | 0.205737052          | 4.019124e-03 | TTC27      |
| ENSG00000019102 | 8.891918e+01 | 0.040859939          | 0.7396935216 | -0.276511082         | 2.487726e-02 | -0.273003503         | 2.681405e-02 | -0.095315221         | 4.383976e-01 | VSIG2      |
| ENSG00000019144 | 6.748294e+00 | 0.292912212          | 0.0048094981 | 0.421224304          | 5.013711e-05 | 0.254883181          | 1.378732e-02 | 0.121616789          | 2.365985e-01 | PHLDB1     |
| ENSG00000019582 | 6.046596e+05 | -0.039705973         | 0.4743687375 | -0.075436621         | 1.785941e-01 | -0.096125372         | 8.653042e-02 | -0.145468820         | 1.043422e-02 | CD74       |
| ENSG00000020256 | 2.871377e+02 | -0.028690258         | 0.6985831973 | -0.055945177         | 4.539444e-01 | -0.046675165         | 5.324494e-01 | 0.149783163          | 4.629094e-02 | ZFP64      |
| ENSG00000020577 | 2.914287e+02 | 0.165724708          | 0.2053677187 | 0.089262438          | 4.936098e-01 | 0.155893879          | 2.318585e-01 | 0.347560218          | 7.414965e-03 | SAMD4A     |
| ENSG00000020633 | 8.709555e+03 | -0.000544292         | 0.9960268435 | -0.176820465         | 1.066935e-01 | -0.157058825         | 1.518772e-01 | -0.255415855         | 2.021037e-02 | RUNX3      |
| ENSG00000020922 | 1.570851e+03 | -0.027675321         | 0.7120181831 | 0.007689897          | 9.189549e-01 | 0.017470880          | 8.172072e-01 | -0.173708928         | 2.297574e-02 | MRE11      |
| ENSG00000021355 | 7.509977e+03 | -0.116815987         | 0.0361798771 | 0.037365350          | 5.070707e-01 | -0.022095311         | 6.949014e-01 | 0.094740043          | 9.670534e-02 | SERPINB1   |
| ENSG00000021762 | 1.206856e+03 | 0.171460818          | 0.0469523082 | -0.112242411         | 1.968308e-01 | -0.043819155         | 6.143172e-01 | 0.241107630          | 5.894198e-03 | OSBPL5     |
| ENSG00000021776 | 2.167681e+03 | 0.117368526          | 0.0129458334 | 0.117422642          | 1.393366e-02 | 0.095537722          | 4.556824e-02 | 0.139130929          | 4.041800e-03 | AQR        |
| ENSG00000021826 | 1.651001e+00 | -0.057494997         | 0.4342417355 | 0.057377961          | 4.363086e-01 | 0.030557307          | 6.775878e-01 | 0.231497319          | 1.824699e-03 | CPS1       |
| ENSG00000022277 | 4.370013e+03 | -0.079076470         | 0.0032105704 | -0.025751097         | 3.428098e-01 | -0.084417884         | 1.907451e-03 | -0.049968094         | 6.994141e-02 | RTFDC1     |
| ENSG00000022976 | 3.173661e+02 | -0.074599231         | 0.2444335463 | -0.115974637         | 7.352629e-02 | -0.083545341         | 1.974561e-01 | -0.144409406         | 2.767299e-02 | ZNF839     |
| ENSG00000023041 | 1.060985e+03 | 0.088853579          | 0.0616724698 | 0.095711478          | 4.657556e-02 | 0.168854983          | 4.422313e-04 | 0.098160234          | 4.384590e-02 | ZDHHC6     |
| ENSG00000023287 | 1.432977e+03 | 0.172592788          | 0.0058473559 | 0.074385691          | 2.396974e-01 | 0.004267742          | 9.462673e-01 | 0.078221074          | 2.218310e-01 | RB1CC1     |
| ENSG00000023330 | 6.002744e+02 | 0.160954231          | 0.0644963645 | 0.235050402          | 7.262017e-03 | 0.247117643          | 4.774563e-03 | 0.179492668          | 4.216424e-02 | ALAS1      |
| ENSG00000023445 | 1.795102e+03 | 0.127040993          | 0.2244615461 | 0.155561612          | 1.383023e-01 | 0.214584319          | 4.090050e-02 | -0.006152410         | 9.534707e-01 | BIRC3      |
| ENSG00000023572 | 1.375010e+02 | 0.183623927          | 0.0488130358 | 0.216410588          | 2.077092e-02 | 0.139730597          | 1.365641e-01 | -0.006471051         | 9.455956e-01 | GLRX2      |
| ENSG00000023608 | 1.824506e+02 | 0.264819724          | 0.0197256794 | 0.264062418          | 2.029305e-02 | -0.046332612         | 6.845883e-01 | 0.064457456          | 5.725934e-01 | SNAPC1     |
| ENSG00000023734 | 3.589275e+03 | 0.042186902          | 0.3925993334 | 0.103027319          | 3.884608e-02 | 0.016628405          | 7.390025e-01 | 0.091777257          | 6.941567e-02 | STRAP      |
| ENSG00000023839 | 6.461072e+01 | 0.072291611          | 0.5021066532 | 0.218066833          | 4.284148e-02 | 0.239568613          | 2.615624e-02 | -0.053784510         | 6.207489e-01 | ABCC2      |
| ENSG00000024862 | 6.204541e+02 | 0.025326857          | 0.7208457406 | 0.099400925          | 1.639161e-01 | 0.052801372          | 4.601638e-01 | 0.183952574          | 1.075081e-02 | CCDC28A    |
| ENSG00000025708 | 2.042060e+04 | 0.059839094          | 0.6136509570 | -0.016218420         | 8.912543e-01 | -0.119313761         | 3.145223e-01 | 0.278101411          | 1.919120e-02 | TYMP       |
| ENSG00000025770 | 9.414124e+02 | 0.044519715          | 0.4937843032 | 0.002544649          | 9.691115e-01 | 0.011133138          | 8.655155e-01 | -0.164862927         | 1.326649e-02 | NCAPH2     |
| ENSG00000025772 | 1.689738e+03 | -0.007260233         | 0.9346237053 | -0.037649693         | 6.725307e-01 | -0.122225884         | 1.701427e-01 | -0.189858174         | 3.447076e-02 | TOMM34     |
| ENSG00000026297 | 1.017027e+04 | -0.139777862         | 0.1431496039 | -0.128958431         | 1.789920e-01 | -0.191393631         | 4.610499e-02 | -0.195756405         | 4.266272e-02 | RNASET2    |
| ENSG00000026559 | 2.934687e+00 | 0.167699498          | 0.0201997040 | 0.083777383          | 2.441235e-01 | 0.002215646          | 9.753555e-01 | 0.185862352          | 9.868207e-03 | KCNG1      |
| ENSG00000026950 | 2.062359e+03 | 0.249730378          | 0.0064621344 | 0.131441726          | 1.541785e-01 | 0.131226477          | 1.548834e-01 | 0.070860816          | 4.456969e-01 | BTN3A1     |
| ENSG00000027697 | 7.246863e+03 | 0.060827759          | 0.4961346777 | 0.216592055          | 1.600597e-02 | 0.109166532          | 2.247581e-01 | 0.188717231          | 3.725404e-02 | IFNGR1     |
| ENSG00000027869 | 1.094500e+01 | 0.126404057          | 0.199220363  | 0.179225182          | 6.819337e-02 | 0.285792223          | 3.658964e-03 | 0.078553653          | 4.217244e-01 | SH2D2A     |
| ENSG00000029363 | 9.226276e+03 | 0.118831763          | 0.0415332047 | 0.074149287          | 2.080544e-01 | -0.017863949         | 7.617067e-01 | -0.055142906         | 3.552120e-01 | BCLAF1     |
| ENSG00000029364 | 1.752307e+03 | 0.088618004          | 0.0895516332 | 0.056733458          | 2.824656e-01 | 0.064215916          | 2.239331e-01 | 0.105184545          | 4.899541e-02 | SLC39A9    |
| ENSG00000029534 | 2.699178e+01 | -0.126856528         | 0.2966292011 | -0.235614321         | 5.157043e-02 | -0.098591557         | 4.155581e-01 | -0.247266672         | 4.005295e-02 | ANK1       |
| ENSG00000029639 | 1.655424e+02 | 0.032464131          | 0.7090904383 | 0.068666825          | 4.324087e-01 | 0.055149981          | 5.289372e-01 | 0.202513737          | 2.123363e-02 | TFB1M      |
| ENSG00000030066 | 1.343057e+03 | 0.200960614          | 0.0073731690 | 0.135735669          | 7.271702e-02 | 0.297017158          | 8.513823e-05 | 0.313100838          | 4.100861e-05 | NUP160     |
| ENSG00000030419 | 4.216373e+01 | 0.271851617          | 0.0388617464 | 0.184895207          | 1.589344e-01 | 0.318287452          | 1.529721e-02 | 0.138596298          | 2.893052e-01 | IKZF2      |
| ENSG00000032389 | 1.050178e+03 | -0.132328208         | 0.0120204969 | -0.086150172         | 1.053563e-01 | -0.126162519         | 1.786846e-02 | -0.128204818         | 1.749021e-02 | EIPR1      |
| ENSG00000032742 | 2.331233e+02 | 0.115760859          | 0.2542553961 | 0.137959883          | 1.757500e-01 | 0.029342517          | 7.737083e-01 | 0.206545995          | 4.374130e-02 | IFT88      |
| ENSG00000033122 | 6.360551e+01 | -0.003752495         | 0.9724424330 | -0.307601578         | 5.104205e-03 | -0.192768580         | 7.862540e-02 | -0.047695186         | 6.628071e-01 | LRRC7      |
| ENSG00000033178 | 1.574422e+03 | 0.229522633          | 0.0001212399 | 0.105324217          | 8.104540e-02 | 0.094455731          | 1.178306e-01 | 0.228209895          | 1.855377e-04 | UBA6       |
| ENSG00000034510 | 6.602791e+04 | -0.103581998         | 0.0327883571 | -0.012174382         | 8.040188e-01 | -0.059715493         | 2.235505e-01 | -0.034572691         | 4.868944e-01 | TMSB10     |
| ENSG00000034533 | 2.153818e+02 | 0.206212782          | 0.0495802767 | 0.153155435          | 1.463582e-01 | 0.125063290          | 2.358837e-01 | 0.028905894          | 7.851098e-01 | ASTE1      |
| ENSG00000034677 | 1.421846e+03 | 0.189062290          | 0.0107361857 | 0.079948007          | 2.848439e-01 | -0.058410998         | 4.350012e-01 | -0.030274544         | 6.887338e-01 | RNF19A     |
| ENSG00000034713 | 2.725383e+03 | -0.131422251         | 0.0506469490 | 0.042752473          | 5.284288e-01 | -0.041745702         | 5.383581e-01 | -0.147612004         | 3.147355e-02 | GABARAPL2  |
| ENSG00000035403 | 1.038851e+04 | -0.114229170         | 0.0429469030 | -0.073732739         | 1.959065e-01 | -0.018692774         | 7.429977e-01 | -0.043724538         | 4.488258e-01 | VCL        |
| ENSG00000035499 | 1.296453e+01 | 0.337938557          | 0.0069770089 | 0.188227090          | 1.308411e-01 | 0.218871724          | 7.892953e-02 | 0.354845888          | 4.269057e-03 | DEPDC1B    |
| ENSG00000035664 | 8.976947e+01 | -0.140592907         | 0.2852228135 | -0.070985695         | 5.882440e-01 | -0.003137466         | 9.809101e-01 | -0.308180045         | 1.822428e-02 | DAPK2      |
| ENSG00000035687 | 1.829808e+03 | 0.024015305          | 0.6586417508 | 0.126054134          | 2.162236e-02 | 0.163690124          | 2.857360e-03 | 0.107354962          | 5.349545e-02 | ADSS       |
| ENSG00000035720 | 6.643338e+01 | 0.490797202          | 0.0001386941 | 0.398013708          | 1.919884e-03 | 0.208488918          | 1.040006e-01 | 0.397027183          | 1.873264e-03 | STAP1      |
| ENSG00000035862 | 5.131732e+03 | -0.159652783         | 0.0130095940 | -0.075676335         | 2.434732e-01 | -0.115789459         | 7.437840e-02 | -0.009929993         | 8.797419e-01 | TIMP2      |
| ENSG00000036054 | 9.205123e+02 | 0.182396376          | 0.0320471446 | 0.139288053          | 1.040125e-01 | 0.056024421          | 5.134569e-01 | 0.149964660          | 8.255775e-02 | TBC1D23    |
| ENSG00000036257 | 1.723330e+03 | 0.225211702          | 0.0027538425 | 0.115563737          | 1.276874e-01 | 0.095755775          | 2.069937e-01 | 0.245091465          | 1.374892e-03 | CUL3       |
| ENSG00000036672 | 6.375834e+00 | 0.198317684          | 0.0100332383 | 0.123357624          | 1.084205e-01 | 0.018136256          | 8.131048e-01 | 0.106546503          | 1.643945e-01 | USP2       |
| ENSG00000037474 | 2.700440e+03 | 0.116242877          | 0            |                      |              |                      |              |                      |              |            |

| ENSEMBL         | baseMean     | eaSSc_log2FoldChange | eaSSc_pvalue | ncSSc_log2FoldChange | ncSSc_pvalue | lcSSc_log2FoldChange | lcSSc_pvalue | dcSSc_log2FoldChange | dcSSc_pvalue | GeneSymbol |
|-----------------|--------------|----------------------|--------------|----------------------|--------------|----------------------|--------------|----------------------|--------------|------------|
| ENSG00000050730 | 6.046100e-01 | 0.0679177378         | 0.1447951978 | 0.091483132          | 0.0496921180 | 0.053307179          | 0.2511496599 | 0.027388721          | 5.552925e-01 | TNIP3      |
| ENSG00000051108 | 1.191251e+04 | -0.0119194432        | 0.8816932059 | 0.025303351          | 0.7538410518 | -0.113343528         | 0.1601648920 | -0.226810322         | 5.356279e-03 | HERPUD1    |
| ENSG00000051180 | 2.307561e+01 | 0.2357323956         | 0.0716854002 | 0.039531022          | 0.7617090070 | 0.304843141          | 0.0194563697 | 0.040200597          | 7.566060e-01 | RAD51      |
| ENSG00000051341 | 4.239508e+01 | 0.4207011651         | 0.0013664771 | 0.298470171          | 0.0227877681 | 0.382514371          | 0.0035185324 | 0.091579048          | 4.834971e-01 | POLQ       |
| ENSG00000051620 | 2.166898e+03 | -0.1837733798        | 0.0157135089 | 0.037199890          | 0.6273933382 | -0.114052626         | 0.1369319064 | -0.026085210         | 7.361457e-01 | HEBP2      |
| ENSG00000052126 | 4.973330e+02 | -0.1623344585        | 0.1050486194 | -0.150725437         | 0.1339817528 | -0.233258142         | 0.0204664634 | -0.397667486         | 8.599246e-05 | PLEKHA5    |
| ENSG00000052723 | 1.100087e+03 | 0.0476651356         | 0.4096001877 | 0.030559073          | 0.6008744076 | 0.109923696          | 0.0597315650 | 0.131080301          | 2.642688e-02 | SIKE1      |
| ENSG00000052795 | 3.251140e+03 | 0.0009369148         | 0.9879325015 | -0.137251986         | 0.0282892705 | -0.066150771         | 0.2904213755 | -0.119099774         | 6.001543e-02 | FNIP2      |
| ENSG00000052850 | 2.711208e+00 | 0.1255834817         | 0.1395167706 | -0.008663038         | 0.9182992563 | 0.169076941          | 0.0462583314 | 0.030083809          | 7.213446e-01 | ALX4       |
| ENSG00000053254 | 8.076175e+03 | -0.1228148781        | 0.0283935581 | -0.154069160         | 0.0065040083 | -0.175156712         | 0.0019793715 | -0.070106915         | 2.213918e-01 | FOXN3      |
| ENSG00000053371 | 1.543882e+03 | -0.1367870134        | 0.0080501196 | -0.105692208         | 0.0427633900 | -0.137936447         | 0.0082485265 | -0.099881688         | 5.867219e-02 | AKR7A2     |
| ENSG00000053372 | 7.521936e+02 | -0.1396322276        | 0.0316288882 | -0.051654515         | 0.4300082368 | -0.081570119         | 0.2131254227 | -0.015535994         | 8.146302e-01 | MRT04      |
| ENSG00000053770 | 1.024472e+03 | 0.1706612261         | 0.0014935314 | 0.174963894          | 0.0012729131 | 0.199745655          | 0.0002355320 | 0.153134445          | 5.379790e-03 | AP5M1      |
| ENSG00000053900 | 1.013635e+03 | 0.1834619951         | 0.0004505366 | 0.126790357          | 0.0165215801 | 0.164634500          | 0.0018544883 | 0.070514944          | 1.887876e-01 | ANAPC4     |
| ENSG00000053918 | 4.531548e+03 | -0.0187465428        | 0.7370561454 | -0.079476096         | 0.1589979269 | -0.137895876         | 0.0145704087 | -0.016660926         | 7.705751e-01 | KCNQ1      |
| ENSG00000054148 | 1.460714e+03 | -0.1092190842        | 0.0392851493 | -0.117766527         | 0.0279018559 | -0.084924798         | 0.1128786841 | -0.071000656         | 1.903945e-01 | PHPT1      |
| ENSG00000054219 | 1.798232e+03 | -0.1575263838        | 0.0420991038 | -0.147378435         | 0.0591708761 | 0.029226763          | 0.7081202377 | -0.035015564         | 6.569130e-01 | LY75       |
| ENSG00000054282 | 9.764135e+02 | -0.0044127156        | 0.9368331940 | -0.039833397         | 0.4790815174 | -0.106197683         | 0.0595988722 | -0.112698464         | 4.835008e-02 | SDCCAG8    |
| ENSG00000054523 | 1.198868e+03 | 0.3544445761         | 0.0001234601 | 0.207238372          | 0.0256732674 | 0.177113384          | 0.0565997231 | 0.274803126          | 3.299197e-03 | KIF1B      |
| ENSG00000054611 | 2.525000e+03 | -0.0778504897        | 0.2116665979 | -0.068694673         | 0.2750315427 | -0.110798411         | 0.0784260950 | -0.151848811         | 1.714922e-02 | TBC1D22A   |
| ENSG00000054690 | 1.512229e+02 | 0.1566291984         | 0.2070471517 | 0.102281041          | 0.4081877215 | 0.146091522          | 0.2374628128 | 0.309884412          | 1.180904e-02 | PLEKHH1    |
| ENSG00000054793 | 5.776588e+00 | -0.2030972880        | 0.0033259469 | -0.221445013         | 0.0013465435 | -0.154852305         | 0.0250163501 | -0.168888928         | 1.434593e-02 | ATP9A      |
| ENSG00000054965 | 3.074286e+03 | 0.1595233823         | 0.0084612311 | 0.087795395          | 0.1514122344 | 0.064671488          | 0.2907637489 | 0.036911524          | 5.513503e-01 | FAM168A    |
| ENSG00000055070 | 4.787480e+03 | -0.0170991258        | 0.6323418768 | -0.013593765         | 0.7070152194 | -0.099504082         | 0.0059932267 | -0.025308097         | 4.905431e-01 | SZRD1      |
| ENSG00000055118 | 4.357012e+00 | -0.0364295998        | 0.6793199537 | 0.064754337          | 0.4626870277 | 0.148516143          | 0.0924110002 | 0.206219926          | 1.926929e-02 | KCNH2      |
| ENSG00000055130 | 4.434674e+03 | 0.1196416356         | 0.2813709655 | 0.068766324          | 0.5367808800 | 0.084188914          | 0.4495208791 | 0.338223460          | 2.451885e-03 | CUL1       |
| ENSG00000055332 | 3.092473e+03 | 0.1912946496         | 0.1181301127 | 0.105095790          | 0.3906128654 | -0.028718475         | 0.8145302835 | 0.488528447          | 6.581852e-05 | EIF2AK2    |
| ENSG00000055483 | 2.463057e+03 | 0.2875479005         | 0.0001271914 | 0.180536056          | 0.0170542921 | -0.010111310         | 0.8937847236 | -0.005229283         | 9.454854e-01 | USP36      |
| ENSG00000055609 | 6.375115e+03 | 0.1441128037         | 0.0181703316 | 0.097977182          | 0.1118149022 | 0.060145107          | 0.3290849091 | -0.020785357         | 7.389653e-01 | KMT2C      |
| ENSG00000055917 | 4.420123e+03 | 0.0830958080         | 0.0729541055 | 0.061665127          | 0.1882941961 | 0.120792871          | 0.0099540188 | 0.166366031          | 4.592243e-04 | PUM2       |
| ENSG00000055950 | 1.137177e+03 | -0.0788447358        | 0.0497310395 | -0.080575576         | 0.0474290853 | -0.068847733         | 0.0905477921 | -0.054320726         | 1.874496e-01 | MRPL43     |
| ENSG00000056558 | 1.134374e+03 | 0.0667943368         | 0.3687357855 | 0.078796556          | 0.2929370110 | 0.028903328          | 0.6998228449 | -0.257776955         | 6.776079e-04 | TRAF1      |
| ENSG00000056736 | 4.153532e+01 | 0.2481480583         | 0.0491936476 | 0.145142545          | 0.2502652851 | 0.215771590          | 0.0873108961 | 0.294522875          | 1.919907e-02 | IL17RB     |
| ENSG00000057252 | 2.619866e+03 | 0.1307169313         | 0.0874844310 | 0.182600870          | 0.0178663277 | 0.174202363          | 0.0238727669 | 0.206343261          | 8.034585e-03 | SOAT1      |
| ENSG00000058063 | 3.452525e+03 | 0.0470245006         | 0.3119487125 | 0.133432212          | 0.0045301688 | 0.109096900          | 0.0203434711 | 0.075547713          | 1.129597e-01 | ATP11B     |
| ENSG00000058262 | 6.755300e+03 | 0.0255989473         | 0.4594108219 | 0.015596500          | 0.6561008400 | 0.043978041          | 0.2092828976 | 0.121835960          | 6.024430e-04 | SEC61A1    |
| ENSG00000058600 | 1.207162e+03 | 0.1462531094         | 0.0117440089 | 0.160263195          | 0.0062617715 | 0.072537187          | 0.2166470917 | 0.147374225          | 1.303667e-02 | POLR3E     |
| ENSG00000059145 | 3.739776e+02 | 0.2045866050         | 0.0228519390 | 0.064727906          | 0.4746985998 | 0.056399024          | 0.5335778932 | 0.032268558          | 7.237140e-01 | UNKL       |
| ENSG00000059378 | 2.121960e+03 | 0.1148691043         | 0.2614731755 | 0.034794877          | 0.7347811891 | 0.145624218          | 0.1562055346 | 0.316118609          | 2.190283e-03 | PARP12     |
| ENSG00000059573 | 5.104933e+02 | -0.0970886601        | 0.2387876651 | -0.055090475         | 0.5065614523 | 0.069699945          | 0.4002946048 | 0.169338182          | 4.262925e-02 | ALDH18A1   |
| ENSG00000060140 | 8.245297e-01 | -0.1047199261        | 0.0352600320 | -0.126337311         | 0.0109111854 | -0.114136688         | 0.0213252991 | -0.104051317         | 3.641647e-02 | STYK1      |
| ENSG00000060339 | 2.568796e+03 | 0.1102862142         | 0.0199813721 | 0.053634632          | 0.2633413924 | 0.111022967          | 0.0205746223 | 0.068193680          | 1.606015e-01 | CCAR1      |
| ENSG00000060558 | 3.163633e+03 | 0.0689241597         | 0.2998090006 | -0.066860417         | 0.3191835277 | -0.142534132         | 0.0337733619 | -0.062848563         | 3.544834e-01 | GNA15      |
| ENSG00000060642 | 1.455909e+02 | 0.0475563436         | 0.6400480293 | 0.036408276          | 0.7215002900 | 0.026568504          | 0.7949415369 | 0.227093066          | 2.647345e-02 | PIGV       |
| ENSG00000060709 | 1.968001e+00 | -0.0069535650        | 0.8901101549 | -0.005874287         | 0.9069654923 | 0.048981548          | 0.3299598465 | 0.185197361          | 2.417670e-04 | RIMBP2     |
| ENSG00000060749 | 9.625580e+02 | 0.1964759874         | 0.0015772290 | 0.079752790          | 0.2046606656 | 0.209176272          | 0.0008672465 | 0.111498073          | 7.948477e-02 | QSER1      |
| ENSG00000060971 | 4.945567e+03 | -0.0772961232        | 0.1560217636 | -0.093364549         | 0.0899532515 | -0.126774464         | 0.0213441043 | 0.008457436          | 8.794438e-01 | ACAA1      |
| ENSG00000060982 | 7.223588e+02 | 0.0170185368         | 0.8890495630 | 0.152175097          | 0.2122276175 | -0.070183864         | 0.5651682648 | 0.258834586          | 3.385715e-02 | BCAT1      |
| ENSG00000061656 | 2.611829e+01 | 0.3511621562         | 0.0076291618 | 0.259106392          | 0.0482166521 | 0.208421324          | 0.1120013403 | 0.081466631          | 5.325605e-01 | SPAG4      |
| ENSG00000061936 | 2.331640e+03 | -0.0282738973        | 0.5127398153 | -0.105183653         | 0.0161530865 | -0.081537649         | 0.0622781656 | -0.071174886         | 1.083896e-01 | SFSWAP     |
| ENSG00000061987 | 1.814184e+03 | 0.1213552543         | 0.0268021670 | 0.088520758          | 0.1100604060 | 0.151039493          | 0.0063909265 | 0.060083765          | 2.842992e-01 | MON2       |
| ENSG00000062194 | 2.822525e+03 | 0.0442145390         | 0.3709467837 | 0.083536992          | 0.0943701230 | 0.081240104          | 0.1038869647 | 0.114448636          | 2.374904e-02 | GPBP1      |
| ENSG00000062524 | 1.878202e+02 | 0.1426045043         | 0.2530727454 | 0.132055041          | 0.2896537696 | 0.264463270          | 0.0339096642 | 0.183421956          | 1.409674e-01 | LTK        |
| ENSG00000062716 | 1.787460e+03 | 0.1072429120         | 0.1658093262 | 0.108621006          | 0.1637127348 | 0.053519526          | 0.4927347873 | 0.202006174          | 1.029131e-02 | VMP1       |
| ENSG00000062725 | 8.758420e+02 | 0.1032779544         | 0.1176285304 | 0.051668371          | 0.4382569867 | 0.119945661          | 0.0718518359 | 0.186921164          | 5.481916e-03 | APPBP2     |
| ENSG00000062822 | 7.872308e+02 | 0.1832426776         | 0.0187680779 | 0.024526115          | 0.7552424848 | -0.019965714         | 0.7998088744 | -0.046902587         | 5.550565e-01 | POLD1      |
| ENSG00000063015 | 7.622958e+00 | 0.0021058471         | 0.9849602568 | -0.019775086         | 0.8590449459 | -0.066530626         | 0.5495729835 | -0.234539067         | 3.353166e-02 | SEZ6       |
| ENSG00000063046 | 1.756882e+04 | -0.0984602876        | 0.0667060907 | -0.101724351         | 0.0608582847 | -0.111965502         | 0.0390992803 | -0.127298382         | 2.057811e-02 | EIF4B      |
| ENSG00000063169 | 1.385239e+03 | 0.1703720452         | 0.0098654480 | -0.042241113         | 0.5267533460 | -0.036728879         | 0.5821647100 | 0.094987102          | 1.589428e-01 | BICRA      |
| ENSG00000063177 | 2.917510e+04 | -0.1601623611        | 0.0041773283 | -0.114018914         | 0.0435667000 | -0.116767017         | 0.0387499054 | -0.178900760         | 1.767245e-03 | RPL18      |
| ENSG00000064102 | 2.965599e+02 | 0.2832400324         | 0.0015303480 | 0.163174999          | 0.0699029195 | 0.163109397          | 0.0701682475 | 0.326869710          | 3.089578e-04 | INTS13     |
| ENSG00000064201 | 2.498326e+03 | 0.2350239873         | 0.0251116516 | -0.026592449         | 0.8006722094 | 0.077517252          | 0.4617219052 | 0.217176667          | 4.005536e-02 | TSPAN32    |
| ENSG00000064300 | 4.303681e+01 | 0.0855235719         | 0.4853175606 | 0.087579607          | 0.4732614132 | 0.193517668          | 0.1131153213 | 0.361276828          | 2.970771e-03 | NGFR       |
| ENSG00000064313 | 9.543571e+02 | 0.1703841568         | 0.0105962665 | 0.157678315          | 0.0191089926 | 0.112305706          | 0.0953895867 | 0.104128953          | 1.261892e-01 | TAf2       |
| ENSG00000064490 | 1.110692e+03 | -0.0767203946        | 0.1027499112 | -0.042740729         | 0.3682127630 | -0.122882471         | 0.0098662140 | -0.045708111         | 3.427275e-01 | RFXANK     |
| ENSG00000064607 | 4.162935e+03 | 0.1253203158         | 0.0788170155 | 0.094923987          | 0.1869223343 | 0.146155864          | 0.0421469653 | -0.005540172         | 9.392575e-01 | SUGP2      |
| ENSG00000064763 | 1.015592e+02 | 0.1413536139         | 0.2711518755 | 0.062071523          | 0.6284892541 | 0.364332794          | 0.0044788855 | 0.527814180          | 3.668469e-05 | FAR2       |
| ENSG00000064787 | 2.277542e+00 | 0.0450487290         | 0.5264065208 | 0.160124491          | 0.0245667361 | 0.055025764          | 0.4379635100 | 0.107784270          | 1.290924e-01 |            |

| ENSEMBL         | baseMean     | eaSSc_log2FoldChange | eaSSc_pvalue | ncSSc_log2FoldChange | ncSSc_pvalue | lcSSc_log2FoldChange | lcSSc_pvalue | dcSSc_log2FoldChange | dcSSc_pvalue | GeneSymbol |
|-----------------|--------------|----------------------|--------------|----------------------|--------------|----------------------|--------------|----------------------|--------------|------------|
| ENSG00000067141 | 5.230532e+00 | 0.0619865168         | 4.796118e-01 | 0.106377950          | 2.245406e-01 | 0.2103391631         | 1.644888e-02 | 0.102665808          | 2.395240e-01 | NEO1       |
| ENSG00000067177 | 1.944302e+00 | 0.0776695494         | 2.667829e-01 | 0.085420239          | 2.216247e-01 | 0.1371833087         | 4.974869e-02 | 0.084767447          | 2.239938e-01 | PHKA1      |
| ENSG00000067221 | 1.451433e+02 | -0.0685181501        | 4.663489e-01 | -0.230884469         | 1.493806e-02 | -0.0249249215        | 7.919327e-01 | 0.095344993          | 3.150743e-01 | STOML1     |
| ENSG00000067334 | 3.129573e+03 | 0.0002415425         | 9.971197e-01 | -0.033734039         | 6.173868e-01 | -0.1612901336        | 1.697643e-02 | -0.076718615         | 2.613918e-01 | DNTTIP2    |
| ENSG00000067646 | 1.222657e+02 | 0.0632901485         | 5.724501e-01 | -0.505423581         | 5.212219e-06 | -0.5252651598        | 2.157372e-06 | 0.391116567          | 4.604462e-04 | ZFY        |
| ENSG00000067836 | 2.985469e+03 | -0.1257474017        | 1.496232e-01 | -0.050783701         | 5.631252e-01 | -0.1447528207        | 9.939900e-02 | -0.182303536         | 3.949488e-02 | ROGDI      |
| ENSG00000067900 | 4.950147e+03 | 0.1711781179         | 6.030809e-03 | 0.096896538          | 1.237448e-01 | 0.0480470445         | 4.454126e-01 | 0.121311330          | 5.685264e-02 | ROCK1      |
| ENSG00000068001 | 2.448167e+02 | -0.2769533721        | 5.067845e-03 | -0.186366869         | 6.025296e-02 | -0.1091354008        | 2.709979e-01 | -0.193385975         | 5.241788e-02 | HYAL2      |
| ENSG00000068079 | 1.509845e+03 | 0.1434725679         | 2.329647e-01 | 0.048766774          | 6.853198e-01 | 0.0744186629         | 5.363399e-01 | 0.390369128          | 1.186617e-03 | IFI35      |
| ENSG00000068305 | 4.316595e+03 | 0.0882332098         | 8.217881e-02 | 0.084060797          | 1.013977e-01 | 0.0454646443         | 3.757977e-01 | 0.127155556          | 1.445020e-02 | MEF2A      |
| ENSG00000068308 | 2.545139e+03 | 0.1203369007         | 1.339113e-02 | 0.042632012          | 3.864214e-01 | 0.0122270905         | 8.039325e-01 | 0.045817326          | 3.584693e-01 | OTUD5      |
| ENSG00000068323 | 2.925696e+03 | -0.0081352218        | 8.739432e-01 | -0.077686395         | 1.341097e-01 | -0.1200498128        | 2.068227e-02 | -0.037989973         | 4.695422e-01 | TFE3       |
| ENSG00000068354 | 7.645110e+02 | 0.0171270607         | 7.457692e-01 | 0.029297733          | 5.831419e-01 | -0.0211444300        | 6.926535e-01 | -0.117123905         | 3.083295e-02 | TBC1D25    |
| ENSG00000068366 | 4.490000e+03 | -0.0048309698        | 9.178718e-01 | 0.048824808          | 3.025688e-01 | 0.0336911678         | 4.769678e-01 | 0.140277915          | 3.468182e-03 | ACSL4      |
| ENSG00000068383 | 2.281955e+02 | -0.1650383044        | 7.190039e-02 | -0.047018494         | 6.094296e-01 | -0.2602132016        | 4.870142e-03 | -0.076867014         | 4.072796e-01 | INPP5A     |
| ENSG00000068400 | 3.206466e+03 | 0.1836707930         | 5.550864e-04 | 0.196549518          | 2.560536e-04 | 0.1863435935         | 5.295051e-04 | 0.143366505          | 8.495982e-03 | GRIPAP1    |
| ENSG00000068489 | 5.314967e+02 | -0.0959777107        | 1.746340e-01 | -0.130085198         | 6.816928e-02 | -0.1831948707        | 1.032650e-02 | -0.193640775         | 7.337950e-03 | PRR11      |
| ENSG00000068796 | 1.461040e+03 | -0.0691362210        | 1.851176e-01 | -0.113304437         | 3.171762e-02 | -0.0304444191        | 5.636287e-01 | -0.057325039         | 2.832900e-01 | KIF2A      |
| ENSG00000068878 | 2.564085e+03 | 0.2246935009         | 4.743722e-04 | 0.186674361          | 4.032179e-03 | 0.1644524876         | 1.132007e-02 | 0.120478259          | 6.662995e-02 | PSME4      |
| ENSG00000068885 | 2.469844e+02 | -0.0059132714        | 9.460369e-01 | 0.058003291          | 5.092570e-01 | 0.1733999142         | 4.818922e-02 | 0.084406125          | 3.397446e-01 | IFT80      |
| ENSG00000068976 | 7.439110e+01 | 0.4529723004         | 2.720719e-06 | 0.215417151          | 2.789069e-02 | 0.2873016348         | 3.321587e-03 | 0.081993980          | 4.072244e-01 | PYGM       |
| ENSG00000069248 | 1.207333e+03 | 0.0285700941         | 5.999445e-01 | 0.071892141          | 1.913216e-01 | 0.1379594471         | 1.212883e-02 | 0.043467686          | 4.354599e-01 | NUP133     |
| ENSG00000069329 | 6.801734e+03 | 0.0350715552         | 5.514774e-01 | 0.112246047          | 5.912365e-02 | 0.1404971167         | 1.816563e-02 | 0.157943251          | 8.704240e-03 | VPS35      |
| ENSG00000069345 | 2.035432e+03 | 0.1923614128         | 1.586157e-02 | 0.090735139          | 2.589163e-01 | 0.0295227811         | 7.134535e-01 | 0.150540973          | 6.345127e-02 | DNAJA2     |
| ENSG00000069399 | 4.851064e+03 | 0.0245105951         | 8.083835e-01 | -0.211995275         | 3.675850e-02 | -0.3166404563        | 1.814227e-03 | -0.014681773         | 8.855819e-01 | BCL3       |
| ENSG00000069493 | 7.352965e+02 | 0.2177079071         | 5.120398e-03 | 0.272046364          | 5.176988e-04 | 0.3315410343         | 2.323355e-05 | 0.204052375          | 9.901929e-03 | CLEC2D     |
| ENSG00000069509 | 2.757161e+02 | 0.1621421640         | 2.047532e-01 | 0.479460943          | 1.724589e-04 | 0.1906404083         | 1.354488e-01 | 0.198567163          | 1.192132e-01 | FUNDC1     |
| ENSG00000069696 | 1.979151e+01 | 0.4145439723         | 1.519318e-03 | 0.345114998          | 8.177303e-03 | 0.0329827304         | 8.009184e-01 | 0.207721380          | 1.106116e-01 | DRD4       |
| ENSG00000069849 | 3.291006e+03 | 0.1143766869         | 2.279257e-01 | 0.202468784          | 3.372688e-02 | 0.0886716981         | 3.524871e-01 | 0.108073620          | 2.601809e-01 | ATP1B3     |
| ENSG00000069943 | 3.319690e+02 | 0.1724817366         | 3.637745e-02 | 0.151308534          | 6.841254e-02 | 0.1312158089         | 1.143839e-01 | 0.166157156          | 4.726322e-02 | PIGB       |
| ENSG00000069974 | 1.360949e+03 | 0.0283033821         | 7.346592e-01 | 0.136706567          | 1.038891e-01 | 0.1951379654         | 2.025687e-02 | 0.250357098          | 3.135071e-03 | RAB27A     |
| ENSG00000069998 | 1.608673e+03 | -0.1470472844        | 9.768336e-03 | -0.056338201         | 3.265804e-01 | -0.0640436331        | 2.649752e-01 | 0.074536291          | 1.996195e-01 | HDHD5      |
| ENSG00000070010 | 1.371923e+03 | 0.0363537062         | 4.188806e-01 | -0.011618360         | 7.985834e-01 | 0.0993027185         | 2.896462e-02 | 0.041816831          | 3.643753e-01 | UFD1       |
| ENSG00000070061 | 1.277561e+03 | 0.0255603836         | 6.039805e-01 | 0.096535360          | 5.240638e-02 | 0.1505792322         | 2.474576e-03 | 0.080570270          | 1.101859e-01 | ELP1       |
| ENSG00000070081 | 4.398759e+02 | 0.0588033040         | 5.549755e-01 | 0.185100194          | 6.411136e-02 | -0.0067614330        | 9.461570e-01 | 0.258511618          | 1.010438e-02 | NUCB2      |
| ENSG00000070182 | 6.947012e+00 | -0.1384880472        | 1.579104e-01 | -0.276055739         | 4.691543e-03 | -0.2137847295        | 2.861070e-02 | -0.169482258         | 8.177555e-02 | SPTB       |
| ENSG00000070367 | 1.888314e+03 | 0.1127801606         | 3.565726e-02 | 0.088365272          | 1.035041e-01 | 0.1856577309         | 6.206140e-04 | 0.116742503          | 3.360785e-02 | EXOC5      |
| ENSG00000070423 | 2.368292e+03 | -0.0979051932        | 1.205270e-01 | -0.127040217         | 4.601639e-02 | -0.1618721695        | 1.104215e-02 | -0.138384127         | 3.174779e-02 | RNF126     |
| ENSG00000070444 | 3.103797e+03 | 0.1906915779         | 1.077207e-03 | 0.041085718          | 4.858396e-01 | -0.0224140212        | 7.039208e-01 | -0.101533140         | 8.913279e-02 | MNT        |
| ENSG00000070476 | 2.668845e+03 | -0.0462887868        | 4.258279e-01 | -0.128566444         | 2.863429e-02 | -0.0830850096        | 1.572635e-01 | -0.057512781         | 3.333200e-01 | ZXDC       |
| ENSG00000070495 | 1.576175e+03 | 0.2285536050         | 3.345648e-02 | 0.109364210          | 3.104051e-01 | -0.0773364190        | 4.733011e-01 | -0.025733530         | 8.120993e-01 | JMJD6      |
| ENSG00000070601 | 7.845687e-01 | -0.0073496409        | 8.607601e-01 | 0.035751657          | 3.939944e-01 | 0.0848093318         | 4.322845e-02 | 0.041154451          | 3.261067e-01 | FRMPD1     |
| ENSG00000070756 | 8.547713e+04 | -0.0244588499        | 6.338313e-01 | -0.079563894         | 1.253062e-01 | -0.1358719280        | 8.853798e-03 | -0.045435409         | 3.876341e-01 | PABPC1     |
| ENSG00000070759 | 4.834967e+02 | -0.2632256605        | 3.245754e-04 | -0.023579023         | 7.484595e-01 | -0.2230522055        | 2.509491e-03 | -0.222216867         | 2.882827e-03 | TESK2      |
| ENSG00000070814 | 1.764871e+03 | 0.1785745486         | 4.685022e-02 | 0.101416933          | 2.619035e-01 | 0.0609306686         | 5.003677e-01 | 0.074780279          | 4.116714e-01 | TCOF1      |
| ENSG00000070882 | 1.701989e+03 | 0.1338324928         | 8.618245e-02 | 0.142259254          | 7.032596e-02 | 0.2053518635         | 8.983436e-03 | 0.102863355          | 1.949293e-01 | OSBPL3     |
| ENSG00000070915 | 3.273168e+01 | 0.2362409223         | 6.795228e-02 | 0.219499216          | 8.871594e-02 | 0.2884901950         | 2.528439e-02 | 0.028207926          | 8.258758e-01 | SLC12A3    |
| ENSG00000070961 | 8.820877e+03 | 0.2450024171         | 1.134956e-02 | 0.133820347          | 1.688330e-01 | 0.0229818555         | 8.132074e-01 | -0.045145790         | 6.445552e-01 | ATP2B1     |
| ENSG00000071051 | 8.842136e+02 | -0.2243788389        | 2.250656e-03 | -0.231687550         | 1.762131e-03 | -0.1344384855        | 6.940469e-02 | -0.111222215         | 1.367183e-01 | NCK2       |
| ENSG00000071082 | 2.655113e+04 | -0.1781573880        | 5.766027e-04 | -0.076987003         | 1.410890e-01 | -0.0531484642        | 3.096202e-01 | -0.208298810         | 8.502539e-05 | RPL31      |
| ENSG00000071242 | 6.761882e+02 | -0.0206366924        | 8.340225e-01 | -0.268512828         | 6.711280e-03 | -0.2285788899        | 2.101694e-02 | -0.092139233         | 3.545858e-01 | RPS6KA2    |
| ENSG00000071243 | 1.024079e+03 | 0.1667017125         | 1.557156e-02 | 0.088714989          | 2.022021e-01 | 0.0390802162         | 5.745579e-01 | 0.002919811          | 9.669241e-01 | ING3       |
| ENSG00000071537 | 4.130254e+03 | -0.0104003200        | 8.493901e-01 | 0.062517988          | 2.585248e-01 | 0.1464679110         | 8.107433e-03 | 0.105296524          | 6.018689e-02 | SEL1L      |
| ENSG00000071564 | 2.757980e+03 | -0.0594193417        | 3.397344e-01 | -0.164744189         | 8.788956e-03 | -0.0623616747        | 3.211470e-01 | -0.016238681         | 7.984135e-01 | TCF3       |
| ENSG00000071626 | 5.428821e+03 | -0.0008354579        | 9.862398e-01 | -0.052745858         | 2.815511e-01 | -0.1202133668        | 1.416087e-02 | 0.002257033          | 9.637409e-01 | DAZAP1     |
| ENSG00000071655 | 2.272502e+03 | -0.0630804996        | 3.827460e-01 | -0.138800044         | 5.693950e-02 | -0.1640514820        | 2.447569e-02 | 0.012624683          | 8.638640e-01 | MBD3       |
| ENSG00000071794 | 3.344195e+02 | 0.2747809488         | 3.489749e-03 | 0.166533783          | 7.855115e-02 | 0.3228702886         | 6.390932e-04 | 0.200797339          | 3.509559e-02 | HLTF       |
| ENSG00000071859 | 1.919910e+03 | 0.1099284785         | 2.869450e-02 | 0.055693321          | 2.730639e-01 | -0.0289504643        | 5.693572e-01 | 0.041792415          | 4.172779e-01 | FAM50A     |
| ENSG00000071889 | 8.389893e+02 | -0.0144430303        | 8.541823e-01 | -0.118107390         | 1.360980e-01 | -0.1996455249        | 1.183230e-02 | -0.086730395         | 2.782498e-01 | FAM3A      |
| ENSG00000071994 | 1.884227e+03 | -0.0925559233        | 2.917066e-02 | -0.024704879         | 5.644700e-01 | -0.0739315839        | 8.507738e-02 | 0.022701762          | 6.013839e-01 | PDCD2      |
| ENSG00000072062 | 5.481622e+03 | -0.1143940342        | 1.697046e-02 | -0.073988540         | 1.266952e-01 | -0.0461976662        | 3.403060e-01 | -0.003611298         | 9.413513e-01 | PRKACA     |
| ENSG00000072110 | 3.732485e+03 | -0.0489160660        | 6.240876e-01 | -0.047550989         | 6.353002e-01 | -0.1559888437        | 1.197820e-01 | -0.215647052         | 3.244296e-02 | ACTN1      |
| ENSG00000072364 | 4.160218e+03 | 0.1537743213         | 5.821313e-03 | 0.032353403          | 5.659898e-01 | -0.0247618027        | 6.605707e-01 | -0.016295044         | 7.753360e-01 | AFF4       |
| ENSG00000072415 | 3.935248e+02 | 0.0168562827         | 8.221843e-01 | 0.022871332          | 7.623596e-01 | 0.0183368831         | 8.085909e-01 | -0.214986030         | 5.047799e-03 | MPP5       |
| ENSG00000072501 | 5.544585e+03 | 0.0386792170         | 4.820619e-01 | 0.109994621          | 4.779108e-02 | 0.1135877535         | 4.098609e-02 | 0.135649407          | 1.599043e-02 | SMC1A      |
| ENSG00000072518 | 3.589815e+03 | -0.0305128053        | 6.000813e-01 | -0.209082821         | 3.794444e-04 | -0.0702772634        | 2.320631e-01 | 0.035362552          | 5.523548e-01 | MARK2      |
| ENSG00000072682 | 1.210935e+01 | 0.1685459427         | 1.944656e-01 | 0.293627750          | 2.343556e-02 | 0.0552903712         | 6.688678e-01 | 0.139482685          | 2.786935e-01 | P4HA2      |
| ENSG00000072756 | 2.585951e+02 | 0.1414430878         | 7.760700e-02 | 0.229508244          | 4.406944e-03 | 0.2                  |              |                      |              |            |







| ENSEMBL         | baseMean     | eaSSc_log2FoldChange | eaSSc_pvalue | ncSSc_log2FoldChange | ncSSc_pvalue | lcSSc_log2FoldChange | lcSSc_pvalue | dcSSc_log2FoldChange | dcSSc_pvalue | GeneSymbol |
|-----------------|--------------|----------------------|--------------|----------------------|--------------|----------------------|--------------|----------------------|--------------|------------|
| ENSG00000100413 | 1.243893e+03 | -0.156289683         | 1.228421e-03 | -0.055634484         | 0.2542396227 | -0.112378747         | 2.150053e-02 | -1.235820e-01        | 1.258777e-02 | POLR3H     |
| ENSG00000100417 | 7.550133e+02 | -0.150223949         | 3.457956e-02 | -0.149866248         | 0.0366328740 | -0.089172049         | 2.135877e-01 | -2.911479e-01        | 6.027347e-05 | PMM1       |
| ENSG00000100418 | 1.338438e+03 | -0.047536366         | 3.682945e-01 | 0.004344542          | 0.9351121500 | -0.115340510         | 3.102218e-02 | -8.776053e-03        | 8.710680e-01 | DESI1      |
| ENSG00000100422 | 6.061273e+03 | -0.007554269         | 8.894257e-01 | 0.001019262          | 0.9851896822 | -0.036100426         | 5.109667e-01 | -1.753474e-01        | 1.625684e-03 | CERK       |
| ENSG00000100426 | 2.069173e+03 | -0.080078530         | 6.508501e-02 | -0.080533097         | 0.0666589849 | -0.104097704         | 1.785865e-02 | -7.385506e-02        | 9.713484e-02 | ZBED4      |
| ENSG00000100442 | 9.217048e+02 | -0.097027721         | 3.198425e-02 | 0.102063849          | 0.0249392987 | 0.046892389          | 3.041361e-01 | -1.028576e-05        | 9.998225e-01 | FKBP3      |
| ENSG00000100473 | 4.254831e+00 | 0.218497494          | 2.917297e-02 | 0.041111128          | 0.6792510341 | 0.038440667          | 6.986854e-01 | 1.345009e-01         | 1.756462e-01 | COCH       |
| ENSG00000100479 | 1.587090e+01 | 0.508363818          | 9.706837e-05 | 0.350480184          | 0.0069477075 | 0.409130778          | 1.628708e-03 | 3.854191e-01         | 2.862979e-03 | POLE2      |
| ENSG00000100483 | 6.163591e+02 | 0.197613507          | 3.750334e-03 | 0.093298124          | 0.1756968381 | 0.019467568          | 7.778907e-01 | -5.343800e-02        | 4.439786e-01 | VCPKMT     |
| ENSG00000100523 | 1.780695e+03 | 0.205700307          | 1.324758e-02 | 0.124976399          | 0.1351739740 | 0.123055143          | 1.413283e-01 | -1.534767e-02        | 8.557245e-01 | DDHD1      |
| ENSG00000100554 | 9.154529e+02 | 0.080858859          | 2.302953e-01 | 0.141584058          | 0.0372859282 | 0.131655634          | 5.291842e-02 | 1.344413e-01         | 5.047283e-02 | ATP6V1D    |
| ENSG00000100558 | 3.816467e+01 | 0.141756779          | 2.675730e-01 | 0.109387653          | 0.3904542456 | 0.368571116          | 3.832143e-03 | 1.319917e-01         | 2.976960e-01 | PLEK2      |
| ENSG00000100567 | 1.941173e+03 | 0.085613731          | 9.807699e-02 | 0.113048208          | 0.0306227541 | 0.137637643          | 8.492886e-03 | 1.025351e-01         | 5.303524e-02 | PSMA3      |
| ENSG00000100575 | 5.407990e+02 | -0.135258948         | 3.084820e-02 | -0.078476715         | 0.2142166072 | -0.033986685         | 5.906006e-01 | -1.137309e-01        | 7.537350e-02 | TIMM9      |
| ENSG00000100580 | 1.166665e+03 | 0.011260364          | 8.864689e-01 | 0.089855809          | 0.2579755461 | -0.008194701         | 9.178943e-01 | 2.223556e-01         | 5.528217e-03 | TMED8      |
| ENSG00000100583 | 3.616613e+00 | -0.205077918         | 2.879180e-02 | -0.076904320         | 0.4128188939 | -0.079915862         | 3.941777e-01 | -1.121161e-01        | 2.309615e-01 | SAMD15     |
| ENSG00000100593 | 6.998700e-01 | -0.034571303         | 5.543938e-01 | -0.032407967         | 0.5788936343 | 0.014566747          | 8.030967e-01 | 1.268086e-01         | 3.163952e-02 | ISM2       |
| ENSG00000100596 | 7.014357e+03 | 0.013172167          | 8.547005e-01 | 0.114339846          | 0.1149722013 | 0.017556703          | 8.087884e-01 | 2.574760e-01         | 4.431729e-04 | SPTLC2     |
| ENSG00000100601 | 1.713395e+02 | 0.191230318          | 4.698834e-02 | 0.134138978          | 0.1660373005 | -0.039454624         | 6.848629e-01 | 6.668855e-03         | 9.455484e-01 | ALKBH1     |
| ENSG00000100605 | 6.458942e+03 | -0.106163874         | 6.971955e-02 | -0.062417524         | 0.2910885435 | -0.158731046         | 7.275008e-03 | -6.403037e-02        | 2.847184e-01 | ITPK1      |
| ENSG00000100612 | 1.639068e+03 | -0.144204683         | 2.140233e-02 | -0.021045426         | 0.7392170236 | -0.027012102         | 6.692823e-01 | -5.302568e-02        | 4.073287e-01 | DHRS7      |
| ENSG00000100647 | 9.058234e+03 | -0.009326083         | 8.464665e-01 | -0.095184789         | 0.0506942895 | -0.097655941         | 4.500832e-02 | -9.632213e-02        | 5.106442e-02 | SUSD6      |
| ENSG00000100652 | 3.620849e+00 | 0.179884506          | 8.218687e-02 | 0.231868201          | 0.0248936083 | -0.017458889         | 8.645656e-01 | 4.135828e-03         | 9.677183e-01 | SLC10A1    |
| ENSG00000100664 | 1.050152e+04 | 0.119456890          | 4.584115e-02 | 0.078797489          | 0.1921953471 | -0.053265131         | 3.781232e-01 | -1.079072e-01        | 7.776884e-02 | EIF5       |
| ENSG00000100711 | 2.898651e+02 | 0.031861162          | 6.844625e-01 | 0.071852158          | 0.3627639322 | 0.215418851          | 6.246856e-03 | 6.838821e-02         | 3.906877e-01 | ZFYVE21    |
| ENSG00000100714 | 1.386787e+03 | 0.024946650          | 6.892659e-01 | 0.052158517          | 0.4074144772 | 0.064480703          | 3.058673e-01 | 2.147334e-01         | 7.435624e-04 | MTHFD1     |
| ENSG00000100721 | 8.636404e+01 | 0.260265128          | 1.111158e-02 | 0.146177410          | 0.1525309209 | 0.045783064          | 6.540247e-01 | 2.445609e-01         | 1.630319e-02 | TCL1A      |
| ENSG00000100722 | 1.100091e+03 | 0.084714522          | 1.271960e-01 | 0.094709481          | 0.0914298076 | 0.173612763          | 1.962799e-03 | 8.920610e-02         | 1.164805e-01 | ZC3H14     |
| ENSG00000100749 | 4.823590e+02 | -0.072466832         | 2.720563e-01 | 0.017918468          | 0.7875342656 | -0.005448300         | 9.347713e-01 | -2.404662e-01        | 3.732936e-04 | VRK1       |
| ENSG00000100767 | 2.114156e+02 | 0.128895375          | 1.735743e-01 | 0.007207452          | 0.9398042449 | -0.006509356         | 9.456727e-01 | 2.330178e-01         | 1.485077e-02 | PAPLN      |
| ENSG00000100796 | 5.603990e+03 | 0.163003847          | 1.004801e-02 | 0.013929696          | 0.8275627226 | 0.004282470          | 9.466126e-01 | 3.085878e-02         | 6.334154e-01 | PPP4R3A    |
| ENSG00000100811 | 7.319726e+03 | -0.036226875         | 4.507418e-01 | -0.101990001         | 0.0357876312 | -0.005296191         | 9.131750e-01 | -2.418158e-03        | 9.608184e-01 | YY1        |
| ENSG00000100814 | 1.401736e+03 | -0.207491484         | 1.399547e-03 | -0.075047157         | 0.2518433059 | -0.022506623         | 7.310848e-01 | -1.677000e-01        | 1.141739e-02 | CCNB1IP1   |
| ENSG00000100823 | 6.464303e+03 | -0.119042665         | 4.662960e-02 | -0.042176467         | 0.4851256431 | -0.161694070         | 7.463960e-03 | -9.236543e-02        | 1.310339e-01 | APEX1      |
| ENSG00000100865 | 5.863990e+02 | -0.112342279         | 4.729741e-02 | -0.041025752         | 0.4727070338 | -0.097251477         | 8.950677e-02 | -9.899671e-02        | 8.728747e-02 | CINP       |
| ENSG00000100883 | 9.915597e+02 | 0.124497465          | 2.666529e-02 | 0.152790721          | 0.0070587901 | 0.180793075          | 1.436333e-03 | 1.849096e-01         | 1.282695e-03 | SRP54      |
| ENSG00000100888 | 3.104757e+03 | 0.132478057          | 3.011419e-03 | 0.040666982          | 0.3682323722 | 0.056596603          | 2.105727e-01 | 8.512058e-02         | 6.318540e-02 | CHD8       |
| ENSG00000100890 | 2.457466e+02 | 0.013608179          | 8.565166e-01 | 0.069734016          | 0.3572047840 | 0.171182351          | 2.356733e-02 | 1.612386e-01         | 3.459175e-02 | KIAA0391   |
| ENSG00000100934 | 1.214495e+03 | 0.094064812          | 6.508382e-02 | 0.127846509          | 0.0131051041 | 0.118305011          | 2.179389e-02 | 2.117930e-01         | 4.827122e-05 | SEC23A     |
| ENSG00000100938 | 1.937855e+03 | -0.120659570         | 3.517108e-03 | 0.043633249          | 0.2955701491 | -0.061238815         | 1.430214e-01 | -3.522808e-04        | 9.933604e-01 | GMPR2      |
| ENSG00000100968 | 1.222593e+00 | 0.079335777          | 2.301766e-01 | 0.160979665          | 0.0151649099 | 0.008073245          | 9.022378e-01 | 8.190150e-02         | 2.142297e-01 | NFATC4     |
| ENSG00000100979 | 3.294492e+01 | -0.136727423         | 2.988254e-01 | -0.256473559         | 0.0507019493 | -0.290661823         | 2.681505e-02 | -2.408376e-01        | 6.551805e-02 | PLTP       |
| ENSG00000100994 | 3.445751e+03 | 0.036934128          | 4.964992e-01 | -0.030458232         | 0.5790518823 | 0.056947171          | 2.995084e-01 | 1.894433e-01         | 6.501501e-04 | PYGB       |
| ENSG00000101017 | 6.198740e+02 | 0.148685131          | 2.048847e-01 | 0.245103161          | 0.0367966859 | 0.394852447          | 7.674709e-04 | 8.643075e-02         | 4.623844e-01 | CD40       |
| ENSG00000101019 | 5.466943e+02 | 0.003206839          | 9.564311e-01 | 0.105945119          | 0.0731380084 | 0.115343941          | 5.123671e-02 | 1.403307e-01         | 1.898166e-02 | UQC1       |
| ENSG00000101052 | 8.787990e+02 | -0.202421556         | 5.127567e-04 | -0.110298179         | 0.0605338381 | -0.120181433         | 4.100703e-02 | -2.071843e-01        | 5.080501e-04 | IFT52      |
| ENSG00000101057 | 7.309739e+01 | 0.455279937          | 1.886816e-04 | 0.200108340          | 0.0993505223 | 0.292550708          | 1.599329e-02 | 3.500821e-01         | 3.773470e-03 | MYBL2      |
| ENSG00000101079 | 1.430990e+03 | -0.142967492         | 4.498171e-03 | -0.063677119         | 0.2101231792 | -0.104579041         | 3.979545e-02 | 9.194241e-03         | 8.581591e-01 | NDRG3      |
| ENSG00000101082 | 4.161536e+01 | -0.147617521         | 2.155323e-01 | -0.195798066         | 0.0991621884 | 0.001140220          | 9.923426e-01 | -2.639952e-01        | 2.544501e-02 | SLA2       |
| ENSG00000101096 | 3.581406e+03 | -0.078651657         | 3.255661e-01 | -0.131763546         | 0.1021539975 | -0.084460202         | 2.947655e-01 | -1.762518e-01        | 3.029565e-02 | NFATC2     |
| ENSG00000101104 | 5.267500e+02 | 0.138934708          | 1.304086e-01 | 0.193422030          | 0.0362210266 | 0.212397230          | 2.147123e-02 | -1.627131e-03        | 9.860607e-01 | PABPC1L    |
| ENSG00000101126 | 2.532349e+03 | 0.147956753          | 2.095882e-02 | 0.081005500          | 0.2106771724 | 0.029897897          | 6.442235e-01 | 3.953087e-02         | 5.460322e-01 | ADNP       |
| ENSG00000101160 | 2.393486e+04 | -0.080726672         | 5.009288e-02 | 0.001757266          | 0.9663721441 | -0.088523733         | 3.371870e-02 | -7.770667e-02        | 6.607810e-02 | CTSZ       |
| ENSG00000101162 | 1.278182e+02 | -0.118108114         | 2.900907e-01 | -0.231677031         | 0.0372931776 | -0.048621047         | 6.621233e-01 | -2.028919e-01        | 6.701765e-02 | TUBB1      |
| ENSG00000101187 | 8.033277e+01 | 0.066147837          | 5.595030e-01 | 0.272628032          | 0.0158315335 | 0.081920203          | 4.682735e-01 | 2.338649e-01         | 3.762471e-02 | SLCO4A1    |
| ENSG00000101188 | 1.961997e+01 | 0.063470180          | 5.174997e-01 | -0.060986733         | 0.5324892869 | -0.010393071         | 9.152909e-01 | 2.833194e-01         | 3.697055e-03 | NTSR1      |
| ENSG00000101194 | 1.987352e+03 | 0.182587969          | 2.844410e-02 | 0.110596215          | 0.1876483271 | 0.195587655          | 1.978690e-02 | -6.824870e-02        | 4.203471e-01 | SLC17A9    |
| ENSG00000101199 | 2.634099e+03 | 0.120804289          | 2.407594e-02 | 0.096365096          | 0.0749839509 | 0.076318473          | 1.586531e-01 | 4.821769e-02         | 3.793844e-01 | ARFGAP1    |
| ENSG00000101210 | 1.427769e+01 | 0.337840438          | 6.904519e-03 | 0.174002552          | 0.1620607514 | 0.153724180          | 2.164760e-01 | 1.819388e-01         | 1.414995e-01 | EEF1A2     |
| ENSG00000101255 | 2.395667e+02 | -0.311895273         | 1.129779e-02 | 0.063520254          | 0.6054699642 | -0.141311698         | 2.507984e-01 | -4.493377e-02        | 7.148063e-01 | TRIB3      |
| ENSG00000101310 | 2.660674e+03 | 0.046990787          | 4.700882e-01 | 0.147847584          | 0.0242932681 | 0.025975008          | 6.924908e-01 | 1.525005e-01         | 2.163373e-02 | SEC23B     |
| ENSG00000101311 | 1.562186e+00 | 0.024282137          | 6.197272e-01 | 0.053168428          | 0.2770494622 | 0.050576821          | 3.007337e-01 | 1.394610e-01         | 4.415516e-03 | FERMT1     |
| ENSG00000101336 | 1.078753e+04 | -0.105374110         | 8.206795e-02 | -0.014727698         | 0.8092368245 | -0.128713093         | 3.546511e-02 | -2.284261e-02        | 7.122952e-01 | HCK        |
| ENSG00000101342 | 7.699804e+02 | 0.030209253          | 7.170654e-01 | 0.025890544          | 0.7577705387 | 0.164982179          | 4.923126e-02 | 1.966254e-01         | 2.009440e-02 | TLDC2      |
| ENSG00000101347 | 7.168464e+04 | -0.023635492         | 6.948660e-01 | -0.028279397         | 0.6421420784 | -0.009417711         | 8.770125e-01 | 1.685154e-01         | 6.221557e-03 | SAMHD1     |
| ENSG00000101367 | 6.330190e+03 | -0.011808160         | 7.587038e-01 | -0.031558990         | 0.4172144261 | -0.058300229         | 1.341069e-01 | -8.522568e-02        | 3.086222e-02 | MAPRE1     |
| ENSG00000101384 | 3.015614e+02 | 0.259753714          | 2.910467e-02 | -0.007217279         | 0.9517321654 | -0.085386834         | 4.740697e-01 | -9.843375e-02        | 4.094813e-01 | JAG1       |
| ENSG00000101391 | 8.294516e+02 | 0.125017683          | 1.157890e-02 | 0.097030919          | 0.0527240586 | 0.136945055          | 6.255754e-03 | 8.311837e-02         | 1.016895e-01 |            |

















































































































| ENSEMBL         | baseMean    | eaSSc_log2FoldChange | eaSSc_pvalue | ncSSc_log2FoldChange | ncSSc_pvalue | lcSSc_log2FoldChange | lcSSc_pvalue | dcSSc_log2FoldChange | dcSSc_pvalue | GeneSymbol  |
|-----------------|-------------|----------------------|--------------|----------------------|--------------|----------------------|--------------|----------------------|--------------|-------------|
| ENSG00000267834 | 5.8486664   | 0.1543547417         | 0.155579188  | 0.2817921646         | 0.0095161546 | 0.055060820          | 0.6102733569 | 0.091446439          | 0.3959035538 | AL592211.1  |
| ENSG00000267895 | 6.5414274   | 0.1911130093         | 0.084734294  | 0.0888230413         | 0.4207729177 | 0.282254233          | 0.0107628879 | 0.056030366          | 0.6093650811 | AC063977.1  |
| ENSG00000267896 | 76.1000300  | 0.2728457769         | 0.010341010  | -0.0334685901        | 0.7556665975 | 0.265299411          | 0.0130404926 | 0.063600706          | 0.5548538713 | NA          |
| ENSG00000267980 | 89.8618755  | 0.3280368057         | 0.002453799  | 0.0341172555         | 0.7545412069 | -0.047170344         | 0.6662848195 | 0.010968839          | 0.9203313419 | AC007292.1  |
| ENSG00000268006 | 281.1035226 | 0.2178325035         | 0.014203587  | 0.1223427354         | 0.1717830065 | 0.169643876          | 0.0580874726 | 0.089587666          | 0.3206556404 | PTOV1-AS1   |
| ENSG00000268030 | 93.9776115  | 0.0803173265         | 0.413128291  | 0.0161640503         | 0.8700010996 | 0.043745118          | 0.6579414543 | -0.198636339         | 0.0469302471 | AC005253.1  |
| ENSG00000268056 | 11.5580268  | -0.2664096911        | 0.041822864  | -0.1327985486        | 0.3083505889 | -0.288965017         | 0.0269624942 | -0.111197263         | 0.3923269548 | AC020913.1  |
| ENSG00000268154 | 1.7382409   | 0.1718471847         | 0.009660127  | 0.0690167144         | 0.2964762020 | 0.078839806          | 0.2325789152 | 0.068253834          | 0.3013013360 | Metazoa_SRP |
| ENSG00000268199 | 3.8866493   | 0.1907744222         | 0.093068739  | 0.2806514717         | 0.0134824786 | 0.094299560          | 0.4026207724 | 0.210309721          | 0.0621650032 | AC010335.1  |
| ENSG00000268204 | 28.9906389  | 0.2930552731         | 0.020397915  | 0.2982823754         | 0.0181753873 | 0.031595348          | 0.8033051041 | 0.212149717          | 0.0927019278 | AC008763.1  |
| ENSG00000268205 | 311.8751683 | 0.1399923437         | 0.220342870  | 0.2125438390         | 0.0631909336 | 0.135023509          | 0.2381334084 | 0.379201582          | 0.0009328858 | AC005261.2  |
| ENSG00000268218 | 216.9538335 | 0.3065742483         | 0.002344409  | 0.0179036778         | 0.8600054171 | 0.194001968          | 0.0555930105 | 0.256714368          | 0.0116629767 | AC137932.3  |
| ENSG00000268222 | 14.9399051  | -0.2468342488        | 0.060568951  | -0.3104970164        | 0.0179459863 | -0.174722784         | 0.1827672205 | -0.244482239         | 0.0613067121 | EEF1A1P7    |
| ENSG00000268279 | 25.7798718  | 0.2919835756         | 0.025353962  | 0.0349502224         | 0.7880332919 | 0.206207155          | 0.1128377012 | 0.123841331          | 0.3386778172 | AC090004.1  |
| ENSG00000268288 | 0.5539986   | -0.0806132898        | 0.093106473  | -0.0633719131        | 0.1872775548 | -0.019120565         | 0.6908797180 | -0.103454249         | 0.0307914908 | AL589765.5  |
| ENSG00000268355 | 198.8070547 | -0.0478107891        | 0.698487536  | 0.1527617620         | 0.2153807514 | -0.093042445         | 0.4508788473 | -0.291313165         | 0.0183098063 | AC243960.3  |
| ENSG00000268362 | 39.5560911  | 0.2173045943         | 0.098233159  | 0.2382582056         | 0.0688637156 | 0.317687773          | 0.0152792137 | 0.293890912          | 0.0242190790 | AC092279.1  |
| ENSG00000268366 | 12.1549096  | 0.2788447681         | 0.029816673  | 0.1294820798         | 0.3108188780 | 0.208740303          | 0.1024137359 | 0.002302707          | 0.9855154304 | AC010271.1  |
| ENSG00000268471 | 21.6267586  | 0.2616481791         | 0.047200480  | -0.0084084640        | 0.9490004754 | 0.108677290          | 0.4084011961 | -0.037913162         | 0.7721511991 | LINC02486   |
| ENSG00000268509 | 1.6555440   | -0.0007416589        | 0.992865241  | -0.0123957278        | 0.8808957855 | -0.161811145         | 0.0482885182 | -0.063070911         | 0.4438616003 | AC026202.3  |
| ENSG00000268555 | 1.8714049   | -0.2313886898        | 0.001083195  | -0.2282659651        | 0.0012535051 | -0.098602443         | 0.1647132055 | -0.210867625         | 0.0028239644 | AC123912.4  |
| ENSG00000268592 | 6.5298108   | 0.0586036937         | 0.601782327  | -0.0928409706        | 0.4052297031 | 0.087279102          | 0.4354058658 | 0.227307432          | 0.0420778886 | RAET1E-AS1  |
| ENSG00000268628 | 4.6296020   | -0.1998542236        | 0.034176753  | -0.0628737549        | 0.5054843620 | -0.087938375         | 0.3509653174 | -0.129323372         | 0.1689613534 | AL121761.2  |
| ENSG00000268635 | 4.1678147   | 0.0671106955         | 0.560376269  | 0.2985452636         | 0.0100034461 | 0.066276129          | 0.5639956360 | 0.100350013          | 0.3800452066 | AP003680.1  |
| ENSG00000268658 | 1.9339683   | 0.0377194006         | 0.570396162  | 0.1484397452         | 0.0258410675 | 0.070851255          | 0.2858801186 | 0.068031793          | 0.3050481614 | LINC00664   |
| ENSG00000268678 | 6.6640354   | 0.0679703042         | 0.519371967  | 0.0275624449         | 0.7929696239 | 0.234767926          | 0.0258615814 | 0.056585672          | 0.5892988019 | AC005261.3  |
| ENSG00000268686 | 2.2838082   | -0.0766160059        | 0.355586149  | -0.2081003173        | 0.0115346617 | 0.022522863          | 0.7860369072 | -0.115134816         | 0.1626657296 | AC010643.1  |
| ENSG00000268743 | 5.4721883   | -0.0450391504        | 0.710200221  | -0.0781902901        | 0.5168816367 | -0.108081759         | 0.3693989481 | -0.236735793         | 0.0478317085 | AC008737.1  |
| ENSG00000268785 | 4.7572513   | -0.2673585322        | 0.029756157  | -0.1000577893        | 0.4169154824 | -0.141745600         | 0.2489973945 | -0.100270654         | 0.4135084717 | RPL7P50     |
| ENSG00000268790 | 0.5631815   | -0.1180826663        | 0.024323492  | -0.0910484928        | 0.0825571399 | -0.089771434         | 0.0865116545 | -0.084626577         | 0.1069072483 | AC008764.4  |
| ENSG00000268804 | 8.7897826   | 0.1618761649         | 0.150454081  | 0.3157768976         | 0.0049919709 | 0.118874757          | 0.2887949720 | 0.119868545          | 0.2828390652 | LINC02132   |
| ENSG00000268836 | 14.3090671  | 0.0474411019         | 0.715293130  | 0.0708326885         | 0.5847157775 | 0.274737942          | 0.0342126821 | -0.123329959         | 0.3383068328 | Z69706.1    |
| ENSG00000268858 | 100.2445479 | 0.1577524366         | 0.129564367  | 0.3102645790         | 0.0028628555 | 0.184408651          | 0.0773187130 | 0.129227584          | 0.2187239895 | AL118506.1  |
| ENSG00000268996 | 188.4999883 | -0.2101723948        | 0.036781065  | -0.0896512384        | 0.3744205764 | -0.131530586         | 0.1930111321 | -0.244475496         | 0.0161366471 | MAN1B1-AS1  |
| ENSG00000269038 | 5.0294299   | -0.2485633403        | 0.024380683  | 0.0886034663         | 0.4252314923 | -0.235372914         | 0.0324408576 | -0.199965444         | 0.0684405150 | AP001462.1  |
| ENSG00000269069 | 26.7553220  | 0.2441685847         | 0.063068072  | 0.1859539587         | 0.1559066790 | 0.264375168          | 0.0436277750 | 0.281025957          | 0.0313609359 | AC007842.1  |
| ENSG00000269131 | 504.5153679 | 0.1649699070         | 0.017496554  | 0.0903113957         | 0.1979884158 | 0.238826308          | 0.0006480799 | 0.106799787          | 0.1317329724 | NA          |
| ENSG00000269153 | 52.8719589  | -0.2843735540        | 0.014758087  | -0.0993635932        | 0.3929080861 | -0.304415776         | 0.0092065710 | -0.221813013         | 0.0574923052 | LYPLA2P2    |
| ENSG00000269227 | 19.2568105  | 0.0846774814         | 0.476788482  | 0.1222890485         | 0.3027143010 | 0.324136059          | 0.0063598653 | 0.056925976          | 0.6294071479 | NA          |
| ENSG00000269242 | 959.4703144 | -0.1097187804        | 0.160701477  | 0.0445048769         | 0.5719885762 | 0.059118625          | 0.4529090344 | -0.209834066         | 0.0084060883 | AC010422.3  |
| ENSG00000269293 | 175.9177626 | -0.2306942411        | 0.008145053  | -0.2156615044        | 0.0139598849 | -0.198177077         | 0.0239631119 | -0.300536887         | 0.0006900589 | ZSCAN16-AS1 |
| ENSG00000269313 | 43.9129604  | 0.1239898556         | 0.333700261  | 0.2993231426         | 0.0192669889 | 0.192039325          | 0.1336239688 | 0.170335224          | 0.1825908217 | MAGIX       |
| ENSG00000269385 | 1.3485705   | -0.0353871065        | 0.579487503  | 0.0290760456         | 0.6490865234 | 0.137901029          | 0.0313785775 | 0.135579145          | 0.0347259274 | AC020895.1  |
| ENSG00000269404 | 766.8365863 | 0.2759044603         | 0.025992451  | 0.2470486801         | 0.0461299359 | 0.197935935          | 0.1101190420 | -0.125162962         | 0.3122827888 | SPIB        |
| ENSG00000269463 | 1.6872186   | 0.1424648552         | 0.063671674  | 0.1452042218         | 0.0584008676 | 0.069071195          | 0.3655693424 | 0.150488081          | 0.0493288594 | AP001160.4  |
| ENSG00000269480 | 28.1296742  | 0.0270775558         | 0.826562397  | -0.2793413140        | 0.0245575146 | -0.094848028         | 0.4438378503 | -0.040952342         | 0.7406189128 | AC020913.2  |
| ENSG00000269481 | 14.5766358  | 0.3170917371         | 0.015700305  | 0.2169691693         | 0.0969743132 | 0.110796497          | 0.3963537971 | 0.341762033          | 0.0086791287 | AC010319.4  |
| ENSG00000269524 | 3.6960925   | 0.1562576381         | 0.087839319  | 0.0532986867         | 0.5586610533 | 0.183976679          | 0.0440326614 | 0.025313033          | 0.7801016223 | AC245052.7  |
| ENSG00000269533 | 3.5284723   | 0.0169759291         | 0.857998492  | -0.0090964642        | 0.9234088738 | -0.115890021         | 0.2185871196 | -0.228098850         | 0.0148095953 | AC003002.4  |
| ENSG00000269556 | 302.3850109 | -0.1676080304        | 0.034832725  | -0.1514182953        | 0.0585296291 | -0.124021005         | 0.1213708555 | -0.181997148         | 0.0241895535 | TMEM185A    |
| ENSG00000269640 | 513.0605104 | 0.0434645646         | 0.659776091  | 0.0220201870         | 0.8242932860 | -0.100420177         | 0.3117262036 | 0.220555738          | 0.0269354386 | NA          |
| ENSG00000269737 | 71.5412068  | -0.0101642751        | 0.935741215  | 0.0004579144         | 0.9970910508 | 0.276155915          | 0.0279654451 | 0.051362716          | 0.6811137363 | AL691432.1  |
| ENSG00000269888 | 585.1024899 | -0.1139420778        | 0.106917484  | -0.0351462262        | 0.6216891495 | -0.037331672         | 0.6003953234 | -0.234398425         | 0.0011626067 | AC112491.1  |
| ENSG00000269894 | 2.4206902   | 0.2102002233         | 0.002298118  | 0.1301267313         | 0.0583806813 | 0.120821510          | 0.0784797572 | 0.006298376          | 0.9265930790 | AC018809.1  |
| ENSG00000269907 | 5.6311910   | -0.1969880256        | 0.043967733  | -0.1163822623        | 0.2335102989 | -0.118772611         | 0.2236441360 | 0.008961984          | 0.9268567465 | AL158827.2  |
| ENSG00000269910 | 29.3116887  | 0.1359786436         | 0.292493111  | 0.2877418255         | 0.0254477095 | 0.270943364          | 0.0354619238 | 0.219121993          | 0.0883058622 | AL049840.2  |
| ENSG00000269948 | 35.2901471  | 0.3413168877         | 0.008892632  | -0.0398610782        | 0.7598146918 | 0.123157306          | 0.3446087425 | -0.049818611         | 0.7015499652 | NA          |
| ENSG00000269952 | 14.7007940  | 0.1734792147         | 0.124739171  | 0.2208746222         | 0.0499159058 | 0.123849352          | 0.2709773480 | 0.114931579          | 0.3051253940 | AL117336.2  |
| ENSG00000269982 | 60.5630635  | 0.0896721066         | 0.433619902  | -0.0694341045        | 0.5462643150 | -0.115430139         | 0.3166636530 | -0.258178576         | 0.0255982936 | AC018809.2  |
| ENSG00000270039 | 10.3718552  | 0.0370446453         | 0.741455344  | 0.1150976255         | 0.3041164106 | 0.232108384          | 0.0384294758 | 0.193270585          | 0.0835136853 | AC025165.5  |
| ENSG00000270062 | 100.5393524 | 0.0509301842         | 0.615670541  | -0.2156707982        | 0.0353158904 | -0.173809588         | 0.0898292437 | -0.198920666         | 0.0534139157 | AL606834.3  |
| ENSG00000270069 | 20.3887196  | 0.3236126660         | 0.009082029  | 0.4097494355         | 0.0009227913 | 0.204795287          | 0.0972024317 | 0.169681065          | 0.1670225380 | MIR222HG    |
| ENSG00000270074 | 0.4378748   | -0.0642448468        | 0.063740068  | -0.0727928616        | 0.0356007826 | -0.046799974         | 0.1766733321 | -0.064410440         | 0.0628364514 | AC087203.3  |
| ENSG00000270084 | 11.6965189  | -0.2561263490        | 0.041825196  | -0.1259166934        | 0.3159714485 | -0.107248151         | 0.3929347977 | -0.077381750         | 0.5360239467 | GAS5-AS1    |
| ENSG00000270115 | 21.0032042  | -0.2293240445        | 0.074972227  | -0.0716986333        | 0.5763393607 | -0.395376964         | 0.0021655973 | -0.051740724         | 0.6858989450 | AL513327.3  |
| ENSG00000270130 | 2.0507866   | 0.0466445826         | 0.546849383  | 0.1064312728         | 0.1692903494 | 0.044005119          | 0.5683889247 | 0.186990326          | 0.0158936836 | AC068790.7  |
| ENSG00000270157 | 57.5340286  | 0.1502451339         | 0.225713996  | 0.1681212958         | 0.1750833333 | 0.289373045          | 0.0194971004 | -0.119213266         | 0.3370196185 | AC004918.3  |
| ENSG00000270170 | 863.30      |                      |              |                      |              |                      |              |                      |              |             |

| ENSEMBL        | baseMean     | eaSSc_log2FoldChange | eaSSc_pvalue | ncSSc_log2FoldChange | ncSSc_pvalue | lcSSc_log2FoldChange | lcSSc_pvalue | dcSSc_log2FoldChange | dcSSc_pvalue  | GeneSymbol |
|----------------|--------------|----------------------|--------------|----------------------|--------------|----------------------|--------------|----------------------|---------------|------------|
| MSG00000271428 | 6.6701331    | -0.227335443         | 4.241009e-02 | -0.0976614530        | 0.3829524918 | -0.035892822         | 0.748587630  | -0.064335894         | 0.5643151498  | AL031281.1 |
| MSG00000271430 | 205.3933366  | -0.067870671         | 5.083390e-01 | 0.0130385186         | 0.8992409159 | 0.257188153          | 0.012300089  | 0.169729492          | 0.0999769823  | NA         |
| MSG00000271503 | 248.2162284  | -0.344771363         | 8.793209e-03 | -0.4031375462        | 0.0021118558 | -0.276868810         | 0.034758264  | -0.359111321         | 0.0059568830  | CCL5       |
| MSG00000271581 | 19.6933044   | 0.098761022          | 4.538724e-01 | 0.3064071613         | 0.0197460813 | 0.053490020          | 0.684050381  | 0.113679068          | 0.3851921568  | AL671883.3 |
| MSG00000271601 | 1060.9171348 | -0.135344729         | 4.843882e-02 | -0.0312257953        | 0.6515071166 | 0.034980193          | 0.612791098  | 0.153187818          | 0.0281486773  | LIX1L      |
| MSG00000271605 | 953.5789466  | -0.179252254         | 2.259679e-02 | 0.0171261950         | 0.8285840868 | -0.143478572         | 0.070046713  | -0.079996958         | 0.3169129473  | MILR1      |
| MSG00000271614 | 1286.1373504 | -0.001511925         | 9.901753e-01 | -0.0191843243        | 0.8758277905 | -0.315688630         | 0.010143506  | -0.360608696         | 0.0033145245  | ATP2B1-AS1 |
| MSG00000271615 | 0.6910756    | -0.111013869         | 3.560818e-02 | -0.0588091871        | 0.2668434485 | -0.109788289         | 0.037313279  | -0.117730294         | 0.0254914780  | ACTG1P22   |
| MSG00000271654 | 0.9876933    | 0.102723958          | 9.664856e-02 | 0.0088018231         | 0.8860973322 | 0.046732376          | 0.446900548  | 0.132642499          | 0.0319750372  | AC025062.2 |
| MSG00000271737 | 8.0242341    | -0.157049844         | 1.808239e-01 | -0.0909370490        | 0.4375844408 | -0.378844629         | 0.001136747  | -0.124280107         | 0.2857958656  | AC008608.2 |
| MSG00000271788 | 2.2795760    | -0.091966258         | 3.188109e-01 | -0.0677621472        | 0.4620095904 | -0.065014233         | 0.479609341  | 0.188308750          | 0.0427377620  | AC008875.1 |
| MSG00000271797 | 39.9624581   | 0.224914842          | 6.260754e-02 | 0.1311352072         | 0.2786639294 | 0.320461734          | 0.20428614   | 0.024001560          | 0.0916682778  | AC008494.3 |
| MSG00000271840 | 6.8932625    | 0.154104215          | 1.604642e-01 | 0.2339265318         | 0.0328218102 | 0.050584330          | 0.642998697  | 0.052746004          | 0.6277338016  | AL031281.2 |
| MSG00000271862 | 17.2509330   | 0.287765060          | 2.177935e-02 | 0.1298742096         | 0.2981735205 | 0.169502352          | 0.174527583  | 0.177114950          | 0.1538852686  | AC104118.1 |
| MSG00000271941 | 21.7460888   | 0.167852578          | 1.995567e-01 | 0.2616074338         | 0.0449432187 | 0.013359368          | 0.918580629  | 0.027987631          | 0.8297998873  | AC104184.1 |
| MSG00000271964 | 17.5950374   | -0.321636556         | 9.404168e-03 | -0.4332712653        | 0.0004398677 | -0.223196095         | 0.070606315  | -0.302139315         | 0.0138911135  | AC090948.1 |
| MSG00000272009 | 22.6721089   | 0.273796103          | 3.530113e-02 | 0.0813338149         | 0.5299465251 | -0.071846241         | 0.578671612  | -0.032766838         | 0.7992090813  | AL121944.1 |
| MSG00000272030 | 12.7823911   | 0.165201139          | 1.995566e-01 | 0.1345342697         | 0.2940892076 | 0.257953862          | 0.044405797  | -0.080506305         | 0.5274325731  | AL162258.2 |
| MSG00000272037 | 26.7030241   | 0.303302986          | 2.126047e-02 | 0.2985551014         | 0.0229851670 | 0.198780688          | 0.130166801  | 0.149347095          | 0.2537671966  | AP002907.1 |
| MSG00000272040 | 17.7422540   | 0.092822027          | 4.812163e-01 | -0.0006477097        | 0.9960651257 | 0.163688039          | 0.212739491  | 0.307638082          | 0.0187051404  | AC010245.2 |
| MSG00000272047 | 342.1047196  | -0.106386187         | 1.475039e-01 | 0.1191657366         | 0.1061004708 | 0.173889614          | 0.018333069  | -0.071905732         | 0.3357678762  | GTF2H5     |
| MSG00000272049 | 1.0117476    | -0.113959279         | 2.844407e-02 | -0.0981549167        | 0.0591461670 | -0.037358525         | 0.472923474  | -0.125108954         | 0.0159285407  | AC091965.4 |
| MSG00000272053 | 45.9965416   | -0.339112784         | 7.922604e-03 | 0.0182520611         | 0.8858640167 | -0.054695678         | 0.667363432  | -0.002129744         | 0.9866170192  | AL160400.1 |
| MSG00000272076 | 1.5871813    | 0.104195723          | 2.070033e-01 | 0.0441997704         | 0.5901991026 | 0.182337227          | 0.027110961  | 0.172725785          | 0.0365786835  | AC090186.1 |
| MSG00000272084 | 21.6536543   | 0.018068632          | 8.877158e-01 | 0.1669944785         | 0.1904069741 | 0.255974555          | 0.044572610  | 0.222259955          | 0.0802467847  | AL137127.1 |
| MSG00000272106 | 263.2293963  | -0.086531000         | 3.057014e-01 | -0.1204421650        | 0.1572374212 | -0.109443868         | 0.198941653  | -0.293439735         | 0.0006503062  | AL691432.2 |
| MSG00000272145 | 36.7916344   | 0.292159947          | 2.271387e-02 | 0.2266838866         | 0.0768263896 | 0.008280628          | 0.948573975  | -0.000330030         | 0.9979440657  | NFYC-AS1   |
| MSG00000272148 | 3.0836000    | 0.254565041          | 4.437614e-03 | 0.1031492401         | 0.2458794735 | 0.082579369          | 0.351969765  | 0.011916517          | 0.8926805447  | AC013403.2 |
| MSG00000272221 | 49.0466756   | -0.330716663         | 5.680388e-03 | -0.0852561994        | 0.4746068469 | -0.013562342         | 0.909451522  | -0.066407742         | 0.5757726682  | AL645933.2 |
| MSG00000272263 | 1.5382358    | 0.052489667          | 4.989315e-01 | 0.0943956838         | 0.0238627598 | 0.152249374          | 0.049996996  | 0.206922997          | 0.0079748000  | AC034198.2 |
| MSG00000272277 | 76.0474471   | 0.037639232          | 7.466351e-01 | 0.0168934756         | 0.8848920145 | -0.257089485         | 0.028296850  | -0.156714400         | 0.1808044227  | AL031963.3 |
| MSG00000272279 | 2.9186428    | -0.200041112         | 1.473772e-02 | -0.1299404067        | 0.1133675795 | -0.132723909         | 0.105429492  | -0.213458307         | 0.0089152506  | AL512329.2 |
| MSG00000272335 | 8.7567339    | 0.121730883          | 3.019083e-01 | 0.2856658444         | 0.0153039567 | 0.158568959          | 0.177099161  | 0.186178212          | 0.1117833874  | AC093297.3 |
| MSG00000272341 | 8.1547270    | 0.153204676          | 1.977644e-01 | 0.3005137437         | 0.0114737429 | 0.272250501          | 0.021863433  | -0.046504657         | 0.6921796262  | AL137003.2 |
| MSG00000272359 | 2.5240795    | 0.057075504          | 5.308931e-01 | -0.0472772875        | 0.6014463218 | 0.053410055          | 0.556146821  | 0.260189118          | 0.0043639826  | RNU4-89P   |
| MSG00000272360 | 5.4685479    | -0.074454752         | 4.817042e-01 | -0.1642611066        | 0.1186450116 | -0.210729344         | 0.044826668  | 0.011275529          | 0.9147443541  | AC116036.2 |
| MSG00000272366 | 1.5158757    | -0.010727481         | 8.817513e-01 | 0.0460619286         | 0.5235085570 | 0.162744665          | 0.024664808  | 0.087460183          | 0.2257323763  | AL158211.3 |
| MSG00000272367 | 56.5729182   | 0.227487339          | 6.351514e-02 | 0.2855451245         | 0.0197231966 | -0.007484480         | 0.951450978  | -0.145586759         | 0.2371089570  | AC018754.1 |
| MSG00000272370 | 2.6299944    | 0.221547063          | 1.760770e-02 | 0.1138231384         | 0.2199176406 | 0.140258683          | 0.130423272  | 0.177946413          | 0.0546195750  | AC092354.2 |
| MSG00000272398 | 29.6736050   | 0.194106711          | 5.491122e-02 | 0.2416436618         | 0.0165640316 | 0.221965541          | 0.027691698  | 0.188551291          | 0.0605292663  | CD24       |
| MSG00000272430 | 14.1857559   | -0.280434513         | 3.018330e-02 | -0.1221429239        | 0.3441444237 | -0.106884464         | 0.407683082  | -0.236815299         | 0.0649268306  | AL356056.3 |
| MSG00000272447 | 113.4722845  | -0.085570904         | 5.092579e-01 | -0.2202847231        | 0.0887474086 | -0.246116981         | 0.057250850  | -0.330055264         | 0.0106036223  | AL135925.1 |
| MSG00000272468 | 1.8033380    | -0.140544343         | 4.391233e-02 | -0.1514711383        | 0.0296746191 | -0.121582537         | 0.080825537  | -0.135329309         | 0.0516172968  | AL021807.1 |
| MSG00000272483 | 8.3787144    | 0.330136944          | 7.470610e-03 | 0.1990932653         | 0.1044511561 | -0.095828598         | 0.431600612  | 0.212926138          | 0.0813509562  | AC022001.3 |
| MSG00000272491 | 8.2740815    | 0.156163250          | 1.506301e-01 | 0.0620428198         | 0.5661499022 | 0.100923803          | 0.350672189  | 0.213262377          | 0.0481922501  | AL109659.2 |
| MSG00000272509 | 12.2753948   | -0.263772599         | 2.519421e-02 | -0.15910192511       | 0.1762010129 | -0.096543122         | 0.011687319  | -0.161288579         | 0.1681853856  | AC087752.4 |
| MSG00000272512 | 20.6481568   | 0.300288867          | 1.238359e-02 | 0.2181337229         | 0.164523335  | 0.168694629          | 0.048734749  | 0.06816276618        | 0.681645608.8 | AL645608.8 |
| MSG00000272518 | 52.0139923   | -0.050965108         | 6.746983e-01 | -0.0764945196        | 0.5289135744 | -0.143508097         | 0.238192131  | -0.275922754         | 0.0235199281  | AC036214.2 |
| MSG00000272523 | 34.3573395   | 0.016764610          | 8.979344e-01 | 0.0211551100         | 0.8711148752 | -0.336586408         | 0.009964113  | 0.030994036          | 0.8115366402  | LINC01023  |
| MSG00000272529 | 7.5139239    | 0.213124441          | 3.592175e-02 | 0.1438594455         | 0.1549694383 | 0.157770430          | 0.118673372  | 0.048292063          | 0.6315804275  | AC090948.3 |
| MSG00000272562 | 2.3333306    | -0.064159105         | 4.641699e-01 | -0.0147927270        | 0.8659134610 | -0.197815850         | 0.022681880  | -0.005689974         | 0.9481391167  | AL512343.2 |
| MSG00000272573 | 3.8673191    | 0.079152996          | 4.400601e-01 | -0.0330691255        | 0.7455965173 | 0.216989517          | 0.034420396  | -0.058398544         | 0.5644553452  | MUSTN1     |
| MSG00000272574 | 8.6432886    | 0.130296684          | 2.539784e-01 | 0.2605003183         | 0.0222977643 | 0.219495405          | 0.053848741  | 0.160692395          | 0.1566655498  | AL596325.2 |
| MSG00000272578 | 102.0577435  | 0.237970802          | 2.381226e-02 | 0.1490057015         | 0.1590465973 | 0.218649538          | 0.038668617  | 0.006524193          | 0.9511952440  | AP000347.1 |
| MSG00000272595 | 0.5618744    | 0.033402978          | 3.107233e-01 | 0.0000000000         | 1.0000000000 | 0.075084732          | 0.022735069  | 0.007462039          | 0.8206514571  | AC092028.1 |
| MSG00000272599 | 12.7902630   | 0.287445914          | 2.604433e-02 | 0.0850773064         | 0.5075991467 | 0.182537268          | 0.155364853  | 0.127056225          | 0.3205295246  | AC016394.1 |
| MSG00000272602 | 173.9938625  | -0.048720295         | 7.056998e-01 | 0.0087614451         | 0.9457549615 | -0.161256819         | 0.210614145  | -0.310594562         | 0.0156986585  | ZNF595     |
| MSG00000272632 | 2.6335762    | -0.085859723         | 3.046199e-01 | -0.1724796153        | 0.0382636974 | -0.134678012         | 0.105664839  | -0.093440984         | 0.2617577470  | AC097504.2 |
| MSG00000272654 | 34.9467679   | 0.071040639          | 5.882962e-01 | 0.1819002775         | 0.1645121726 | 0.375065802          | 0.004137476  | 0.029304129          | 0.8222945190  | AL358472.2 |
| MSG00000272663 | 3.1597255    | -0.191554216         | 2.899586e-02 | -0.1375661244        | 0.1165805402 | -0.060292358         | 0.492074214  | -0.152069794         | 0.0820616053  | AC093635.1 |
| MSG00000272669 | 50.6375782   | 0.528412680          | 2.202508e-05 | 0.4772300151         | 0.0001263849 | 0.227138232          | 0.068925948  | 0.379252490          | 0.0023445703  | AL021707.6 |
| MSG00000272699 | 2.4048640    | -0.078133065         | 3.070385e-01 | -0.1466977407        | 0.0542832446 | -0.157010362         | 0.039111685  | -0.111918012         | 0.1415395118  | AC007620.3 |
| MSG00000272711 | 30.1292688   | 0.243405817          | 6.460120e-02 | 0.3995114745         | 0.0023443343 | 0.377475540          | 0.004039352  | 0.252219461          | 0.0536609974  | AC019069.1 |
| MSG00000272720 | 17.4816246   | 0.087420968          | 4.546580e-01 | 0.0792695038         | 0.4963172506 | 0.135682401          | 0.244315423  | 0.350837304          | 0.0025310147  | AL022322.1 |
| MSG00000272721 | 0.9577507    | 0.014784237          | 7.678084e-01 | 0.1074741932         | 0.0322502926 | -0.007607713         | 0.878912004  | 0.044880908          | 0.3699597555  | AC131235.3 |
| MSG00000272735 | 2.2424741    | 0.151006499          | 2.487934e-02 | 0.0674965615         | 0.3143842978 | 0.050967766          | 0.446795467  | -0.002456892         | 0.9706944097  | AC007881.3 |
| MSG00000272745 | 1.4778971    | 0.141060322          | 3.930929e-02 | 0.0133953106         | 0.8438934319 | 0.005598671          | 0.934283261  | 0.034695904          | 0.6097909852  | AC004948.1 |
| MSG00000272752 | 119.1437001  | 0.191947609          | 5.303696e-02 | 0.1765571688         | 0.0762817844 | 0.228007092          | 0.0220309    |                      |               |            |

| ENSEMBL         | baseMean     | eaSSc_log2FoldChange | eaSSc_pvalue | ncSSc_log2FoldChange | ncSSc_pvalue | lcSSc_log2FoldChange | lcSSc_pvalue | dcSSc_log2FoldChange | dcSSc_pvalue | GeneSymbol  |
|-----------------|--------------|----------------------|--------------|----------------------|--------------|----------------------|--------------|----------------------|--------------|-------------|
| ENSG00000273257 | 1.7368801    | -0.0302658806        | 6.936210e-01 | -0.157079643         | 0.0393985228 | -0.102386018         | 1.796508e-01 | 0.003621983          | 9.623438e-01 | AC069200.1  |
| ENSG00000273261 | 18.9940131   | 0.1054522073         | 4.235477e-01 | 0.347362838          | 0.0081814549 | 0.196185571          | 1.352051e-01 | 0.209781923          | 1.087456e-01 | AC092953.2  |
| ENSG00000273287 | 1.4008990    | 0.1139622500         | 4.776275e-02 | 0.077512163          | 0.1772666694 | 0.059022694          | 3.034098e-01 | 0.057800708          | 3.137676e-01 | AL008718.2  |
| ENSG00000273306 | 30.5453808   | 0.2049083288         | 1.093253e-01 | 0.262689293          | 0.0396792769 | 0.227418168          | 7.516623e-02 | 0.153258177          | 2.298327e-01 | AC018690.1  |
| ENSG00000273311 | 70.4304726   | -0.1515161061        | 2.424281e-01 | -0.190912955         | 0.1400524409 | -0.284960193         | 2.769895e-02 | -0.046655588         | 7.176178e-01 | DGCR11      |
| ENSG00000273314 | 85.6818706   | 0.1351110060         | 2.887663e-01 | 0.153259668          | 0.2281939819 | 0.020714880          | 8.707156e-01 | 0.327977468          | 9.766461e-03 | AC005229.4  |
| ENSG00000273320 | 14.3609479   | -0.0818173347        | 5.347704e-01 | -0.123657046         | 0.3464659287 | -0.314337260         | 1.663718e-02 | -0.473557575         | 2.895440e-04 | AC007032.1  |
| ENSG00000273338 | 56.2018606   | -0.0990351554        | 4.514434e-01 | 0.001268870          | 0.9922800157 | -0.035408275         | 7.871763e-01 | -0.299756351         | 2.184861e-02 | AC103591.3  |
| ENSG00000273340 | 5.6052099    | 0.2048105429         | 3.395693e-02 | 0.106667484          | 0.2674106153 | -0.097760357         | 3.069886e-01 | 0.045672465          | 6.331456e-01 | MICE        |
| ENSG00000273343 | 5.8928685    | 0.0747032004         | 5.111642e-01 | -0.111299617         | 0.3237884881 | 0.274691779          | 1.572618e-02 | -0.110837786         | 3.236584e-01 | AC007663.4  |
| ENSG00000273344 | 154.9895103  | -0.2271335527        | 3.546384e-02 | -0.195976432         | 0.0702713629 | -0.284322172         | 8.736417e-03 | -0.234713061         | 3.086329e-02 | PAXIP1-AS1  |
| ENSG00000273402 | 3.8017087    | 0.006574456          | 9.939795e-01 | 0.174011560          | 0.0462172004 | 0.032155278          | 7.114197e-01 | 0.024203800          | 7.802979e-01 | AC004908.3  |
| ENSG00000273403 | 3.2373444    | 0.1965898096         | 4.255233e-02 | -0.094863497         | 0.3214937539 | 0.122631261          | 2.029170e-01 | 0.161528229          | 9.331583e-02 | AC107294.3  |
| ENSG00000273419 | 5.5981869    | -0.0658042386        | 5.892492e-01 | 0.057256051          | 0.6386749315 | 0.294065474          | 1.637797e-02 | -0.109471010         | 3.641721e-01 | AC004877.1  |
| ENSG00000273428 | 1.5936726    | 0.0054179691         | 9.445202e-01 | 0.031477829          | 0.6860588211 | 0.196737375          | 1.201454e-02 | 0.059818495          | 4.415078e-01 | AC004832.6  |
| ENSG00000273443 | 24.8392450   | 0.3159613127         | 1.032222e-02 | -0.022591422         | 0.8536649187 | -0.096567715         | 4.301159e-01 | 0.107650690          | 3.775691e-01 | AL645608.9  |
| ENSG00000273445 | 2.6758136    | 0.0482348189         | 5.206495e-01 | 0.024845423          | 0.7401969242 | 0.174600134          | 2.014461e-02 | -0.018140080         | 8.081162e-01 | AC133644.2  |
| ENSG00000273449 | 49.7399045   | -0.0096410249        | 9.417113e-01 | 0.040374042          | 0.7587167384 | 0.213999644          | 1.035071e-01 | 0.310924755          | 1.754528e-02 | AC093788.1  |
| ENSG00000273461 | 6.6856129    | -0.0273907354        | 8.149647e-01 | 0.147960224          | 0.2064431705 | 0.257229985          | 2.828354e-02 | 0.010392121          | 9.287274e-01 | AC105265.3  |
| ENSG00000273472 | 289.0175480  | -0.1321688161        | 2.332147e-01 | -0.176792421         | 0.1117150423 | -0.221554154         | 4.633335e-02 | -0.463321233         | 3.337962e-05 | AC096733.2  |
| ENSG00000273478 | 169.3284401  | 0.1400720618         | 1.882403e-01 | 0.086036756          | 0.4208532248 | 0.378117749          | 3.890523e-04 | 0.110595150          | 3.024053e-01 | AC099676.1  |
| ENSG00000273523 | 3.9815680    | 0.2735128440         | 4.492263e-03 | 0.134970333          | 0.1582102932 | 0.215966214          | 2.411475e-02 | 0.198745772          | 3.742638e-02 | AL139082.1  |
| ENSG00000273559 | 1517.9848012 | 0.1861667037         | 1.100570e-02 | 0.046018329          | 0.5333500641 | -0.062158722         | 4.004933e-01 | -0.054399998         | 4.664418e-01 | CWC25       |
| ENSG00000273565 | 12.2778441   | -0.0537921291        | 6.624873e-01 | -0.081622379         | 0.5061111670 | -0.153256683         | 2.112724e-01 | -0.296258642         | 1.502399e-02 | AL691403.2  |
| ENSG00000273604 | 50.1823972   | 0.2915348931         | 2.363222e-02 | 0.053221336          | 0.6781979961 | 0.104057220          | 4.172350e-01 | 0.051914349          | 6.842382e-01 | EPOP        |
| ENSG00000273611 | 676.6875368  | -0.1697291038        | 2.962086e-03 | -0.082041153         | 0.1541864622 | -0.134646397         | 1.960433e-02 | -0.105338548         | 7.103473e-02 | ZNHIT3      |
| ENSG00000273654 | 300.7730180  | -0.1563873604        | 3.845156e-02 | -0.018095785         | 0.8116143156 | -0.157386514         | 3.899331e-02 | -0.065148102         | 3.958774e-01 | AC020904.2  |
| ENSG00000273723 | 6.2603461    | 0.1260482675         | 2.358367e-01 | 0.266779458          | 0.0121139365 | 0.208955429          | 4.897439e-02 | 0.109617121          | 2.988429e-01 | AL139089.1  |
| ENSG00000273727 | 0.7111081    | 0.1447823549         | 1.415719e-02 | 0.002527988          | 0.9655054723 | 0.022827586          | 6.958257e-01 | -0.042830217         | 4.624487e-01 | U1          |
| ENSG00000273802 | 6.0119917    | 0.0134948300         | 8.936084e-01 | -0.014540038         | 0.8850460790 | -0.115194527         | 2.507091e-01 | -0.256169277         | 1.020303e-02 | HIST1H2BG   |
| ENSG00000273812 | 2.6750208    | 0.1590875317         | 8.913879e-02 | 0.266717048          | 0.0044103565 | 0.020559644          | 8.243401e-01 | 0.111293517          | 2.312843e-01 | BX640514.2  |
| ENSG00000273855 | 163.9149515  | 0.2085101992         | 7.137286e-02 | 0.361030405          | 0.0018047826 | 0.339560502          | 3.347945e-03 | 0.244962348          | 3.469518e-02 | AC020658.5  |
| ENSG00000273972 | 19.6352250   | -0.1115092822        | 3.512449e-01 | -0.113185404         | 0.3422310102 | -0.233386189         | 4.989618e-02 | -0.111335584         | 3.480152e-01 | AC068722.2  |
| ENSG00000274012 | 100.5890989  | 0.1092639075         | 2.017083e-01 | 0.059705793          | 0.4844526944 | 0.382030842          | 7.731633e-06 | 0.102938541          | 2.267623e-01 | RN7SL2      |
| ENSG00000274020 | 57.1005231   | 0.2301815311         | 5.313350e-02 | 0.391871557          | 0.0009767351 | 0.357471992          | 2.662052e-03 | 0.280657860          | 1.844973e-02 | LINC01138   |
| ENSG00000274092 | 6.4857058    | 0.0316649858         | 7.781773e-01 | 0.003390206          | 0.9758588180 | -0.222473374         | 4.576980e-02 | -0.120768775         | 2.771971e-01 | AC106739.1  |
| ENSG00000274104 | 58.3675549   | -0.0785726590        | 4.970555e-01 | 0.003288071          | 0.9773195151 | -0.400536606         | 5.977813e-04 | -0.171762999         | 1.395660e-01 | AC020910.4  |
| ENSG00000274191 | 2.2725932    | 0.0366960808         | 6.534800e-01 | 0.109798902          | 0.1795544248 | 0.205065101          | 1.236016e-02 | 0.020711029          | 7.990614e-01 | AC026333.4  |
| ENSG00000274213 | 29.6523958   | -0.0447594309        | 7.318385e-01 | -0.062849313         | 0.6291391389 | -0.327283659         | 1.182210e-02 | -0.014872770         | 9.086010e-01 | AC015912.3  |
| ENSG00000274220 | 1.3353934    | 0.1620323497         | 2.933264e-02 | 0.013991158          | 0.8494130131 | 0.055201379          | 4.538347e-01 | 0.036913384          | 6.164344e-01 | AC009163.7  |
| ENSG00000274270 | 11.7209697   | 0.0586246517         | 6.069132e-01 | -0.042973325         | 0.7048813854 | -0.092405400         | 4.149126e-01 | -0.252925886         | 2.467483e-02 | AL137060.1  |
| ENSG00000274286 | 19.1979930   | 0.2630697660         | 1.425871e-02 | 0.029130762          | 0.7851369426 | -0.026537042         | 8.037268e-01 | -0.060963993         | 5.664221e-01 | ADRA2B      |
| ENSG00000274292 | 73.3888291   | 0.0892134679         | 4.835834e-01 | 0.135938747          | 0.2851374578 | 0.086971271          | 4.942815e-01 | 0.261929018          | 3.894921e-02 | AC084018.2  |
| ENSG00000274315 | 2.6154311    | 0.0966577435         | 2.733688e-01 | 0.120539980          | 0.1713002022 | 0.182443831          | 3.855267e-02 | 0.138709261          | 1.148533e-01 | AC009318.3  |
| ENSG00000274403 | 4.9307780    | -0.0028935963        | 9.773863e-01 | 0.171477083          | 0.0936344730 | 0.207577900          | 4.239244e-02 | 0.046520263          | 6.467429e-01 | AC090510.2  |
| ENSG00000274425 | 113.9408918  | -0.1194221062        | 2.525913e-01 | 0.211631949          | 0.0420047802 | 0.045931227          | 6.601726e-01 | 0.152878394          | 1.442217e-01 | AC114271.1  |
| ENSG00000274466 | 6.5409872    | -0.1887635583        | 1.105990e-01 | -0.268666690         | 0.0223473102 | 0.195540972          | 9.959092e-02 | -0.107902694         | 3.590020e-01 | MIR1273H    |
| ENSG00000274508 | 2.5382851    | 0.2395440450         | 9.634934e-05 | -0.009689720         | 0.8739695681 | 0.113769062          | 6.298733e-02 | 0.027905171          | 6.474190e-01 | AC007336.2  |
| ENSG00000274554 | 2.5719630    | -0.1342619566        | 1.473174e-01 | -0.202302242         | 0.0280151730 | -0.030478871         | 7.420036e-01 | -0.016402702         | 8.595805e-01 | AC083806.2  |
| ENSG00000274576 | 1.5219039    | 0.0224845963         | 6.527231e-01 | 0.109271831          | 0.0289486322 | -0.013164331         | 7.917671e-01 | 0.029814963          | 5.500967e-01 | IGHV2-70    |
| ENSG00000274602 | 498.0845077  | -0.1236457604        | 2.948658e-01 | 0.062608282          | 0.5944990636 | -0.238303992         | 4.272520e-02 | -0.150923012         | 1.973048e-01 | PI4KAP1     |
| ENSG00000274653 | 5.2535422    | -0.1235459418        | 3.016385e-01 | -0.292081866         | 0.0138702142 | -0.144797717         | 2.239604e-01 | -0.213948171         | 7.048543e-02 | AC106782.6  |
| ENSG00000274698 | 1.1748358    | 0.0238089721         | 6.784070e-01 | 0.115920202          | 0.0440364669 | 0.098644664          | 8.597926e-02 | 0.055767289          | 3.310022e-01 | AC099521.2  |
| ENSG00000274705 | 0.9354433    | 0.1281192998         | 2.384908e-02 | 0.033939566          | 0.5475863040 | 0.005869690          | 9.169232e-01 | -0.023181473         | 6.801985e-01 | MIR486-1    |
| ENSG00000274750 | 2.8398174    | -0.1387823871        | 1.223429e-01 | -0.143238978         | 0.1099803053 | -0.086178138         | 3.365482e-01 | -0.224201452         | 1.188597e-02 | HIST1H3E    |
| ENSG00000274767 | 10.5230685   | 0.0005937082         | 9.949340e-01 | -0.215334727         | 0.0207038982 | -0.086887231         | 3.510453e-01 | -0.215706793         | 2.005966e-02 | AC243829.1  |
| ENSG00000274791 | 6.0907255    | 0.0031328102         | 9.803475e-01 | 0.040074546          | 0.7519444688 | 0.104819489          | 4.086498e-01 | 0.314738124          | 1.310575e-02 | F8A2        |
| ENSG00000274849 | 1.4376090    | 0.0248636316         | 7.292617e-01 | 0.156168474          | 0.0304925150 | -0.011227685         | 8.752703e-01 | 0.024737893          | 7.296422e-01 | AC023043.4  |
| ENSG00000274963 | 11.1039205   | 0.0999650062         | 3.786271e-01 | 0.233113388          | 0.0397310612 | 0.070447282          | 5.332737e-01 | -0.051815691         | 6.448481e-01 | RN7SL600P   |
| ENSG00000275052 | 2945.0040664 | 0.0968060394         | 6.173957e-02 | 0.058752613          | 0.2620756257 | 0.118261149          | 2.396373e-02 | 0.181880434          | 6.059017e-04 | PPP4R3B     |
| ENSG00000275063 | 8.7518877    | 0.0381468397         | 5.094864e-01 | 0.028660449          | 0.6197998973 | 0.067889377          | 2.399071e-01 | 0.123990609          | 3.171397e-02 | AC233755.1  |
| ENSG00000275070 | 18.1211560   | 0.2669663104         | 4.253977e-02 | 0.228421013          | 0.0815593726 | 0.393233398          | 2.721004e-03 | 0.074868575          | 5.662998e-01 | Metazoa_SRP |
| ENSG00000275111 | 38.2497993   | 0.2351700930         | 6.041514e-02 | 0.027091916          | 0.8291401001 | 0.540443470          | 1.472831e-05 | 0.447348390          | 3.347621e-04 | ZNF2        |
| ENSG00000275120 | 10.7979431   | -0.2132076980        | 9.345315e-02 | -0.162793230         | 0.1990441407 | -0.092975036         | 4.634244e-01 | -0.305507874         | 1.518863e-02 | AC048382.5  |
| ENSG00000275180 | 11.0412913   | 0.0924904149         | 4.544949e-01 | 0.126606124          | 0.3044441014 | 0.200587097          | 1.038800e-01 | 0.252571601          | 3.972733e-02 | AC048341.3  |
| ENSG00000275197 | 3.4581448    | -0.1924865465        | 5.264228e-02 | -0.192779159         | 0.0516477709 | -0.230384574         | 1.971032e-02 | -0.236383685         | 1.653347e-02 | AC092794.2  |
| ENSG00000275238 | 0.7165496    | -0.0208945696        | 7.114375e-01 | -0.039460573         | 0.4838028282 | -0.027866334         | 6.204191e-01 | 0.119099742          | 3.620969e-02 | MIR4734     |
| ENSG00000275302 | 112.0168412  | -0.                  |              |                      |              |                      |              |                      |              |             |

| ENSEMBL         | baseMean     | eaSSc_log2FoldChange | eaSSc_pvalue | ncSSc_log2FoldChange | ncSSc_pvalue  | lcSSc_log2FoldChange | lcSSc_pvalue | dcSSc_log2FoldChange | dcSSc_pvalue | GeneSymbol  |
|-----------------|--------------|----------------------|--------------|----------------------|---------------|----------------------|--------------|----------------------|--------------|-------------|
| ENSG00000276718 | 29.0553693   | 0.317767566          | 1.396805e-02 | 0.288265564          | 0.0255461833  | 0.440576889          | 0.0006349316 | 0.3180227679         | 1.349422e-02 | AC005840.5  |
| ENSG00000276724 | 9.3131498    | -0.048075528         | 6.251401e-01 | 0.215524094          | 0.0286135422  | 0.086850192          | 0.3768323945 | -0.0967891823        | 3.218882e-01 | AC123768.4  |
| ENSG00000276758 | 17.1156759   | -0.043976883         | 7.137394e-01 | -0.015523930         | 0.8966348624  | 0.238345641          | 0.0464825787 | 0.2536665196         | 3.327104e-02 | AC245884.12 |
| ENSG00000276842 | 144.9772879  | -0.020215718         | 8.591450e-01 | 0.048475297          | 0.6708106043  | 0.347125351          | 0.0022862838 | 0.0547568771         | 6.318649e-01 | AC023510.2  |
| ENSG00000276926 | 1.3029082    | 0.157925548          | 3.474836e-02 | 0.012339296          | 0.8677645935  | 0.110309171          | 0.1378619561 | 0.0451381830         | 5.426656e-01 | MIR6797     |
| ENSG00000277048 | 451.8812819  | -0.002320564         | 9.851278e-01 | -0.058351229         | 0.6379743913  | 0.245047499          | 0.0481713645 | 0.1413791560         | 2.519907e-01 | NA          |
| ENSG00000277144 | 5.2567110    | -0.247172528         | 1.488997e-02 | -0.133946704         | 0.1869988392  | -0.205412603         | 0.0424911889 | -0.3269760667        | 1.161186e-03 | AC092757.3  |
| ENSG00000277170 | 1.8867794    | 0.062020252          | 4.932647e-01 | 0.021643879          | 0.8101489428  | -0.045014289         | 0.6152756696 | 0.2351819511         | 9.670541e-03 | AC012676.3  |
| ENSG00000277182 | 1.0136198    | 0.032796440          | 5.927999e-01 | 0.067913068          | 0.2686041172  | 0.053309476          | 0.3839788036 | 0.1400178879         | 2.274544e-02 | AC006449.5  |
| ENSG00000277203 | 479.6504055  | -0.286159841         | 2.441802e-02 | -0.001990361         | 0.9874934472  | -0.109354768         | 0.3891651899 | -0.0073721134        | 9.536310e-01 | F8A1        |
| ENSG00000277310 | 0.8970245    | 0.019595534          | 7.109825e-01 | 0.098891197          | 0.0622185455  | 0.111145074          | 0.0359063388 | 0.0319243998         | 5.454498e-01 | AC090246.1  |
| ENSG00000277368 | 2.8931052    | -0.248752919         | 9.908139e-03 | -0.314855681         | 0.0010266430  | -0.326373489         | 0.0006490340 | -0.2481671364        | 9.745169e-03 | AL138966.2  |
| ENSG00000277411 | 2.5197327    | -0.099556240         | 2.626785e-01 | 0.177745464          | 0.0483806821  | -0.084878723         | 0.3403028243 | 0.0321673045         | 7.184457e-01 | 5S_rRNA     |
| ENSG00000277443 | 3531.8921007 | -0.001596618         | 9.889365e-01 | -0.262013958         | 0.0230986721  | 0.012920236          | 0.9107960638 | -0.0534980214        | 6.433836e-01 | MARCKS      |
| ENSG00000277450 | 0.7034268    | 0.048544677          | 3.583248e-01 | 0.106809073          | 0.0437657058  | 0.016943584          | 0.7475364985 | 0.0370884534         | 4.818600e-01 | AC002094.4  |
| ENSG00000277476 | 186.8756994  | 0.165659838          | 1.066439e-01 | -0.038030513         | 0.7129038129  | 0.286426584          | 0.0054188801 | 0.1010274774         | 3.296569e-01 | AC005332.8  |
| ENSG00000277593 | 1.6759462    | 0.190930226          | 3.360078e-02 | 0.163689845          | 0.0674179334  | 0.082578966          | 0.3528148105 | 0.1464345999         | 1.007208e-01 | NA          |
| ENSG00000277597 | 0.7131684    | -0.005867389         | 9.150904e-01 | 0.109293900          | 0.0483193126  | 0.035891308          | 0.5142154650 | 0.0028748669         | 9.582719e-01 | AC130343.2  |
| ENSG00000277632 | 613.8471879  | -0.129832595         | 3.110276e-01 | -0.051242859         | 0.6881538130  | -0.328998865         | 0.0099643862 | -0.4310858722        | 6.909219e-04 | CCL3        |
| ENSG00000277687 | 180.1985612  | -0.020699092         | 8.493811e-01 | -0.131854818         | 0.2281798594  | -0.083598769         | 0.4448098090 | -0.3163210417        | 4.013925e-03 | AL139407.1  |
| ENSG00000277758 | 18.2697982   | 0.293403296          | 2.014235e-02 | -0.026991025         | 0.8296329721  | -0.070110599         | 0.5759524396 | -0.0498869830        | 6.896143e-01 | FO681492.1  |
| ENSG00000277856 | 3.5805107    | 0.065050229          | 2.935430e-01 | 0.084830428          | 0.1703326377  | 0.007366230          | 0.9050659072 | 0.2333021397         | 1.648409e-04 | AC233755.2  |
| ENSG00000277948 | 6.5197257    | -0.026784486         | 8.175881e-01 | -0.052244434         | 0.6514375120  | -0.253821009         | 0.0273042031 | -0.0918164842        | 4.249134e-01 | uc_338      |
| ENSG00000277971 | 4.3831739    | 0.291733243          | 1.479923e-02 | 0.223409849          | 0.0601379586  | 0.206996049          | 0.0810007871 | 0.1470880329         | 2.136423e-01 | AC007731.5  |
| ENSG00000277998 | 1137.7914070 | -0.228260712         | 1.338001e-04 | -0.033978403         | 0.5725972598  | -0.077912597         | 0.1961677342 | -0.0838559231        | 1.691719e-01 | AC107075.1  |
| ENSG00000278022 | 4.1233837    | -0.102122116         | 2.770460e-01 | -0.150230835         | 0.1083829905  | -0.153011354         | 0.1016222650 | -0.2011496637        | 3.099603e-02 | AC118658.2  |
| ENSG00000278034 | 2.6892888    | -0.024554707         | 8.101425e-01 | -0.053502659         | 0.5998300182  | -0.097952345         | 0.3349981897 | -0.2091343255        | 3.750804e-02 | MIR6731     |
| ENSG00000278053 | 944.9532706  | 0.182927509          | 2.074260e-03 | 0.069510630          | 0.2473420636  | 0.085604674          | 0.1543891226 | 0.1147748008         | 5.902851e-02 | DDX52       |
| ENSG00000278107 | 10.12314207  | -0.180184196         | 1.619374e-01 | -0.188918524         | 0.1409017266  | -0.344524102         | 0.0070987653 | -0.1158658920        | 3.648322e-01 | AC027575.4  |
| ENSG00000278129 | 351.2387153  | -0.028747079         | 7.335770e-01 | -0.187572697         | 0.0278374754  | 0.118650750          | 0.1625034214 | -0.0626697849        | 4.648866e-01 | ZNF8        |
| ENSG00000278219 | 4.9112153    | -0.305063484         | 1.339478e-02 | -0.224471720         | 0.0684429981  | -0.139234531         | 0.2590679354 | 0.0593914377         | 6.309849e-01 | NA          |
| ENSG00000278224 | 19.0190371   | -0.113769229         | 3.830544e-01 | -0.271449156         | 0.0365485635  | -0.058539622         | 0.6523794618 | 0.1113876870         | 3.896638e-01 | PRICKLE4    |
| ENSG00000278231 | 68.5065622   | -0.043998886         | 6.875010e-01 | -0.009244589         | 0.9327824809  | -0.193939367         | 0.0784140044 | -0.2553225341        | 2.087503e-02 | AL133342.1  |
| ENSG00000278259 | 786.9132380  | 0.090351205          | 1.511076e-01 | -0.002056154         | 0.9742158048  | 0.132009050          | 0.0377137802 | 0.0939472781         | 1.439646e-01 | MYO19       |
| ENSG00000278266 | 4.3111054    | -0.228767859         | 4.043846e-03 | -0.180975649         | 0.0227276871  | -0.222366715         | 0.0050537852 | -0.0604413971        | 4.476009e-01 | AC079949.2  |
| ENSG00000278276 | 8.1422999    | -0.265910516         | 3.083483e-02 | -0.250555254         | 0.0409997013  | -0.121141582         | 0.3239775398 | 0.0108076878         | 9.298725e-01 | AL110115.2  |
| ENSG00000278383 | 1.8286313    | -0.173215766         | 2.181801e-02 | -0.112622120         | 0.1364473994  | -0.045858455         | 0.5446951993 | -0.0671365666        | 3.741208e-01 | AL031673.1  |
| ENSG00000278389 | 0.9164428    | -0.094985236         | 1.693821e-01 | -0.170531064         | 0.0129727247  | -0.158452293         | 0.0207453511 | -0.1350115846        | 4.999499e-02 | AC099518.6  |
| ENSG00000278399 | 0.8179936    | 0.047424447          | 3.722601e-01 | 0.151406744          | 0.0045472295  | 0.028621412          | 0.5890726752 | 0.0605887810         | 2.538134e-01 | AC026120.1  |
| ENSG00000278434 | 5.1032174    | 0.198230286          | 3.907275e-02 | 0.106494407          | 0.2657232475  | 0.136745108          | 0.1528906830 | 0.0589179100         | 5.358559e-01 | AC023830.3  |
| ENSG00000278520 | 3.4446435    | -0.140503448         | 1.704425e-01 | -0.218499118         | 0.0316545688  | -0.052627494         | 0.6065105759 | -0.0924811728        | 3.658490e-01 | MIR7851     |
| ENSG00000278535 | 70.1434497   | -0.039390301         | 7.106101e-01 | -0.240869776         | 0.0244339373  | -0.122287721         | 0.2522077343 | -0.0817127800        | 4.454363e-01 | DHRS11      |
| ENSG00000278558 | 26.8792983   | -0.274458322         | 1.669812e-02 | 0.011733795          | 0.9183436575  | -0.362933294         | 0.0014810599 | -0.1295787865        | 2.551215e-01 | TMEM191B    |
| ENSG00000278590 | 5.1060913    | 0.203624684          | 5.164641e-02 | 0.224699884          | 0.0312727645  | 0.198684960          | 0.0564815236 | 0.1295236095         | 2.119610e-01 | RN7SL113P   |
| ENSG00000278599 | 4.0727817    | 0.198757939          | 9.792775e-03 | -0.012460471         | 0.8705958886  | -0.033074562         | 0.6650847516 | -0.0606810523        | 4.267531e-01 | TBC1D3E     |
| ENSG00000278600 | 186.4809847  | 0.133816555          | 1.780628e-01 | 0.366928048          | 0.0002258254  | 0.164658666          | 0.0989965987 | 0.0333839490         | 7.397992e-01 | AC015871.3  |
| ENSG00000278610 | 0.5320877    | 0.118870812          | 2.025773e-02 | 0.028772547          | 0.5727388290  | 0.065686538          | 0.1979668392 | 0.0280606244         | 5.813534e-01 | AC093152.1  |
| ENSG00000278619 | 58.0182168   | 0.052343445          | 6.765811e-01 | 0.057393356          | 0.6470872463  | 0.019331464          | 0.8775320985 | 0.3260503034         | 9.113658e-03 | MRM1        |
| ENSG00000278709 | 1.3835794    | 0.370554545          | 3.526796e-06 | 0.081568399          | 0.2987812584  | 0.008002274          | 0.9182611950 | 0.0225637686         | 7.726695e-01 | NKILA       |
| ENSG00000278727 | 17.6393631   | 0.076440929          | 5.520424e-01 | 0.178352845          | 0.1640917535  | 0.044443481          | 0.7284901503 | 0.2545788811         | 4.594951e-02 | AC000403.1  |
| ENSG00000278740 | 1.2444629    | -0.099248889         | 1.201203e-01 | -0.113057652         | 0.0762642229  | -0.110412951         | 0.0829329559 | -0.1493875240        | 1.874456e-02 | AC005332.10 |
| ENSG00000278771 | 2.0874301    | 0.070969158          | 2.669327e-01 | 0.022630932          | 0.7228138093  | 0.139744259          | 0.0288084474 | 0.0888911988         | 1.632668e-01 | RN7SL3      |
| ENSG00000278828 | 21.9468652   | -0.377820219         | 8.642677e-04 | -0.318590698         | 0.0048432085  | -0.308280932         | 0.0063980009 | -0.3598722596        | 1.385418e-03 | HIST1H3H    |
| ENSG00000278832 | 4.2334724    | 0.001196241          | 9.905432e-01 | 0.242449966          | 0.0167751520  | -0.063791640         | 0.5251400958 | 0.1211348065         | 2.284157e-01 | NA          |
| ENSG00000278834 | 39.3318683   | -0.170311382         | 1.666425e-01 | -0.290087755         | 0.0187091996  | 0.064721604          | 0.5980378193 | -0.3564650349        | 3.852976e-03 | AC073508.3  |
| ENSG00000278845 | 1093.2960621 | -0.123424743         | 4.898712e-02 | -0.042260662         | 0.5039822481  | -0.006227120         | 0.9215660879 | -0.0849751246        | 1.844220e-01 | MRPL45      |
| ENSG00000278918 | 365.6518844  | 0.269635173          | 6.863200e-03 | 0.203616186          | 0.0422072070  | 0.153786566          | 0.1251883770 | 0.0613436504         | 5.431000e-01 | AC080112.4  |
| ENSG00000278939 | 0.9078125    | 0.109289710          | 3.758510e-02 | 0.092573942          | 0.0777073052  | 0.041595834          | 0.4263733341 | 0.0119917102         | 8.186850e-01 | NA          |
| ENSG00000278943 | 1.5211459    | 0.064681538          | 4.423417e-01 | -0.050503004         | 0.5443401954  | 0.066098789          | 0.4296657839 | 0.2307053653         | 6.507186e-03 | AC079228.1  |
| ENSG00000278985 | 37.3909493   | 0.255523167          | 5.184605e-02 | 0.015416013          | 0.9064112883  | 0.318947680          | 0.0149443198 | -0.1064755167        | 4.152596e-01 | AC092718.7  |
| ENSG00000278991 | 63.8237975   | -0.252485590         | 4.352999e-02 | -0.240187298         | 0.0546431939  | -0.055224927         | 0.6582198048 | -0.1283610348        | 3.034640e-01 | AC090181.3  |
| ENSG00000279069 | 10.9272757   | 0.063705663          | 6.224376e-01 | 0.261177218          | 0.0432212385  | 0.235376036          | 0.0683186134 | 0.1073727760         | 4.026669e-01 | AC015813.5  |
| ENSG00000279092 | 5.2616389    | -0.255891816         | 4.388115e-03 | -0.321038986         | 0.0003331177  | -0.298213081         | 0.0008557679 | -0.3087389461        | 5.474886e-04 | AC025678.3  |
| ENSG00000279095 | 79.2642459   | -0.090016688         | 4.516685e-01 | -0.319236868         | 0.09077905956 | -0.136193249         | 0.2555110844 | -0.3137408332        | 8.947146e-03 | AC024396.3  |
| ENSG00000279103 | 2.9518546    | 0.090148794          | 3.479053e-01 | 0.065408552          | 0.4940631675  | 0.257285819          | 0.0074764740 | 0.1100089870         | 2.500098e-01 | AC138470.1  |
| ENSG00000279121 | 5.9687295    | 0.187472030          | 9.968639e-02 | 0.044437755          | 0.6946204009  | 0.044689218          | 0.6927140355 | -0.2414695740        | 3.070705e-02 | AC073592.5  |
| ENSG00000279140 | 4.7378205    | 0.226060626          | 3.400513e-02 | 0.143125845          | 0.1771855838  | 0.209823888          | 0.0480543155 | 0.0078730963         | 9.403814e-01 | AL590326.2  |
| ENSG00000279159 | 399.4023606  | 0.194007832          | 2.909916e-02 | 0.038                |               |                      |              |                      |              |             |

| ENSEMBL         | baseMean    | eaSSc_log2FoldChange | eaSSc_pvalue | ncSSc_log2FoldChange | ncSSc_pvalue | lcSSc_log2FoldChange | lcSSc_pvalue | dcSSc_log2FoldChange | dcSSc_pvalue | GeneSymbol  |
|-----------------|-------------|----------------------|--------------|----------------------|--------------|----------------------|--------------|----------------------|--------------|-------------|
| ENSG00000279673 | 0.6171219   | -0.116631220         | 0.0298861040 | -0.0580576460        | 0.281183146  | -0.071895418         | 0.180684859  | -0.06390101          | 0.2348034979 | AC092919.2  |
| ENSG00000279689 | 189.7453402 | 0.174222892          | 0.0419392659 | 0.1634370304         | 0.058343110  | 0.165825092          | 0.054983310  | 0.14560522           | 0.0938123257 | AC022400.8  |
| ENSG00000279692 | 83.6045047  | -0.175741868         | 0.1252187717 | -0.2732599542        | 0.017432610  | -0.320090387         | 0.005416320  | -0.09843834          | 0.3917434619 | AC110285.7  |
| ENSG00000279693 | 27.4959266  | -0.136939257         | 0.2960781581 | 0.0336194196         | 0.796964655  | 0.262755563          | 0.044442564  | -0.05144223          | 0.6923828283 | AC099521.3  |
| ENSG00000279700 | 69.0123156  | -0.052011794         | 0.6901038892 | -0.0988630337        | 0.447562302  | -0.036880417         | 0.776918094  | -0.26041456          | 0.0448852304 | AC131212.2  |
| ENSG00000279707 | 2.0745561   | -0.153512956         | 0.0534333839 | -0.1498725381        | 0.059016806  | 0.054301438          | 0.496573330  | -0.20726352          | 0.0087023804 | AC120349.3  |
| ENSG00000279722 | 8.2876547   | 0.200447883          | 0.0702133296 | 0.0552891137         | 0.615584094  | 0.273899262          | 0.013130451  | 0.08318292           | 0.4480290143 | AC007342.7  |
| ENSG00000279744 | 29.1175720  | 0.071878969          | 0.5852608058 | -0.1157205847        | 0.377968575  | 0.274050229          | 0.036882562  | -0.05800648          | 0.6571507335 | AC132938.6  |
| ENSG00000279748 | 14.2312571  | 0.297272577          | 0.0205382833 | 0.3805978961         | 0.002928515  | 0.237743484          | 0.062699809  | 0.44348853           | 0.0004981183 | AC008764.9  |
| ENSG00000279758 | 1.4665460   | -0.114032234         | 0.1579924684 | -0.1752460212        | 0.029153275  | -0.103499789         | 0.198431180  | -0.06285244          | 0.4362081234 | AC105339.4  |
| ENSG00000279765 | 37.0954831  | -0.034283104         | 0.7809070520 | -0.0563334803        | 0.647692682  | -0.110415478         | 0.371160646  | -0.25948035          | 0.0357493705 | AC013394.1  |
| ENSG00000279789 | 56.1843107  | 0.418028129          | 0.0004544161 | 0.2544231852         | 0.033374229  | 0.326080048          | 0.006369059  | 0.37513051           | 0.0016999051 | AC120114.4  |
| ENSG00000279799 | 47.5386080  | -0.129792777         | 0.3125748575 | -0.2723796370        | 0.033948655  | -0.134370858         | 0.295180556  | -0.21188285          | 0.0980999069 | AC006077.2  |
| ENSG00000279805 | 15.1814331  | -0.283622643         | 0.0239954307 | -0.2068046607        | 0.098848085  | -0.016463143         | 0.895609563  | -0.03606312          | 0.7726940734 | Z95114.3    |
| ENSG00000279811 | 20.2283001  | 0.028260942          | 0.8291431297 | -0.0854450593        | 0.512342419  | 0.283136768          | 0.030132882  | 0.15751907           | 0.2255079084 | AC093330.2  |
| ENSG00000279816 | 1.4581037   | -0.113436352         | 0.1495781984 | -0.0612314463        | 0.437705392  | -0.056990464         | 0.469303952  | -0.16498449          | 0.0346866569 | NA          |
| ENSG00000279821 | 2.5572351   | 0.116929888          | 0.1591764447 | 0.1661011587         | 0.045583951  | 0.079974488          | 0.333799331  | 0.04569474           | 0.5793577950 | AC145098.2  |
| ENSG00000279833 | 62.4332766  | 0.104424157          | 0.3811451401 | -0.0638256659        | 0.593564050  | 0.313879828          | 0.008368975  | -0.08323581          | 0.4869051402 | AL031846.2  |
| ENSG00000279838 | 171.6528865 | -0.026572945         | 0.8200866458 | -0.0570416833        | 0.625868830  | -0.034195465         | 0.770097357  | -0.28073545          | 0.0167263041 | AL356273.3  |
| ENSG00000279841 | 9.2046712   | -0.137740068         | 0.1705816956 | -0.0702534139        | 0.483869040  | -0.115782215         | 0.248065398  | -0.21521254          | 0.0309619563 | AC092135.3  |
| ENSG00000279853 | 3.2374706   | -0.186797293         | 0.0504048179 | -0.2270052394        | 0.016924242  | -0.172934002         | 0.068984514  | -0.12423089          | 0.1920180269 | AC004453.2  |
| ENSG00000279861 | 319.8325648 | 0.181786689          | 0.0826156619 | -0.0073091253        | 0.944607491  | -0.040454741         | 0.700704953  | 0.21732294           | 0.0395633664 | AC073548.1  |
| ENSG00000279865 | 13.9262125  | 0.049546132          | 0.7037541486 | 0.0740467069         | 0.568646351  | 0.121572479          | 0.349339691  | 0.29471708           | 0.0227388549 | AC006511.3  |
| ENSG00000279880 | 31.0488518  | -0.258801503         | 0.0309757171 | -0.2830184325        | 0.018461018  | -0.100299677         | 0.401825751  | -0.08434538          | 0.4801270832 | AC134407.3  |
| ENSG00000279928 | 2.3792467   | -0.039784668         | 0.5797825406 | -0.1403212859        | 0.049997769  | -0.125722690         | 0.078871301  | -0.12822192          | 0.0725582306 | FO538757.2  |
| ENSG00000279943 | 3.4119499   | 0.188333839          | 0.0294068792 | 0.1072852887         | 0.212992687  | 0.068510194          | 0.425496213  | -0.02738086          | 0.7488655774 | FLJ38576    |
| ENSG00000279980 | 0.8272561   | 0.170011778          | 0.0196698188 | 0.0531885892         | 0.461275149  | 0.066457745          | 0.356309647  | 0.08880768           | 0.2184173549 | GABARAPL3   |
| ENSG00000280007 | 43.7134976  | 0.118802064          | 0.3414938745 | -0.3639631932        | 0.003723974  | -0.140011200         | 0.263440988  | -0.28103623          | 0.0248361280 | AC008079.2  |
| ENSG00000280015 | 0.4952732   | -0.066104576         | 0.0916391724 | -0.0611521742        | 0.118593039  | -0.071246061         | 0.068742140  | -0.08258849          | 0.0347671135 | AC024023.1  |
| ENSG00000280022 | 3.7119598   | 0.088676472          | 0.2063517696 | 0.1130871145         | 0.106730542  | 0.156632891          | 0.025479567  | 0.13042321           | 0.0624031900 | AC126544.2  |
| ENSG00000280063 | 132.5108545 | 0.064539775          | 0.5544969980 | -0.0395866606        | 0.718092290  | 0.231174120          | 0.034491579  | 0.04065875           | 0.7113514879 | AC012676.5  |
| ENSG00000280088 | 262.0075291 | 0.057483079          | 0.4984368533 | 0.0550756654         | 0.519579914  | 0.071483494          | 0.403446124  | 0.19113954           | 0.0261955695 | AC126474.2  |
| ENSG00000280107 | 2.5935634   | 0.068330837          | 0.3674996104 | 0.1104758538         | 0.144947598  | 0.164018125          | 0.030524713  | 0.16595330           | 0.0284625214 | AL022393.1  |
| ENSG00000280138 | 195.7600992 | 0.368596697          | 0.0050940618 | 0.3518762156         | 0.007331295  | 0.050977174          | 0.697705152  | 0.22472516           | 0.0857143664 | AC027290.2  |
| ENSG00000280162 | 3.2930175   | -0.083156860         | 0.3812135369 | -0.1117990239        | 0.237561109  | -0.213746483         | 0.023269385  | -0.04252598          | 0.6528842732 | AL136531.3  |
| ENSG00000280202 | 148.5912782 | 0.108683518          | 0.3334315283 | 0.1291023946         | 0.251455502  | 0.235777655          | 0.036105947  | 0.26236760           | 0.0199715476 | AC005831.1  |
| ENSG00000280213 | 117.5219267 | 0.002832307          | 0.9808409355 | -0.2330781710        | 0.048800440  | -0.009448510         | 0.936237019  | -0.07715139          | 0.5141523009 | UCKL1-AS1   |
| ENSG00000280228 | 3.0437897   | 0.202993899          | 0.0316972356 | 0.1941293729         | 0.039357634  | 0.114629253          | 0.221841683  | 0.02282218           | 0.8069671584 | AC079753.1  |
| ENSG00000280233 | 4.8749158   | -0.209316149         | 0.0546364346 | -0.2165202462        | 0.046130361  | -0.096576712         | 0.374811917  | -0.16369346          | 0.1306203724 | AC015813.7  |
| ENSG00000280248 | 14.2505911  | -0.027428893         | 0.8351924964 | -0.1284258731        | 0.328530375  | 0.073553554          | 0.575819900  | 0.27598972           | 0.0350056088 | AC124319.4  |
| ENSG00000280254 | 223.2397381 | 0.026361572          | 0.8257483069 | 0.0823753006         | 0.491657434  | -0.207635341         | 0.083423538  | -0.30199388          | 0.0118760074 | AC233723.2  |
| ENSG00000280279 | 2.9504205   | -0.093703507         | 0.1637525696 | -0.1119145718        | 0.095699591  | -0.171398578         | 0.010568966  | -0.07821990          | 0.2438908831 | AC240565.2  |
| ENSG00000280295 | 4.6262660   | -0.234443037         | 0.0183179861 | -0.2326946230        | 0.018834030  | -0.085653521         | 0.388594430  | -0.16216432          | 0.1014934878 | AC099811.6  |
| ENSG00000280327 | 9.1023199   | -0.363895426         | 0.0032658791 | -0.1975190519        | 0.109998509  | -0.323782799         | 0.008608793  | -0.01292455          | 0.9165587664 | Z97633.1    |
| ENSG00000280332 | 33.8885812  | 0.041021935          | 0.7515265828 | 0.1857853170         | 0.150410435  | 0.305989159          | 0.017795853  | 0.16856297           | 0.1908563678 | AC020917.4  |
| ENSG00000280333 | 2.2378553   | 0.105078886          | 0.1565788349 | 0.0307535505         | 0.677301172  | 0.150303495          | 0.042461996  | 0.05091801           | 0.4901684549 | AC090617.10 |
| ENSG00000280347 | 146.6703780 | 0.160263338          | 0.1637782720 | 0.1976799716         | 0.086329093  | 0.262477249          | 0.022743231  | 0.02603943           | 0.8217736753 | AC000123.3  |
| ENSG00000280355 | 46.4700526  | -0.158616235         | 0.2021256486 | 0.2275426061         | 0.065841593  | 0.310932782          | 0.011905093  | 0.02337953           | 0.8502909685 | AL132656.4  |
| ENSG00000280379 | 3.6150580   | 0.097104048          | 0.3326770709 | -0.0250641851        | 0.801459852  | 0.204904347          | 0.041031765  | -0.10198510          | 0.3021119028 | AP003072.5  |
| ENSG00000280384 | 1.8206393   | -0.115328784         | 0.1457901829 | -0.1160636139        | 0.142747247  | -0.026711127         | 0.736421914  | -0.17273998          | 0.0282899597 | FP325332.1  |
| ENSG00000280411 | 6.4147754   | 0.112231917          | 0.0884531813 | 0.0439655255         | 0.503638962  | -0.016798973         | 0.798127726  | 0.14798742           | 0.0243472004 | AC245369.3  |
| ENSG00000280433 | 121.4108748 | -0.021158364         | 0.8497546394 | 0.2505998768         | 0.024725571  | 0.022506700          | 0.840662601  | 0.15059898           | 0.1787901588 | FP565260.7  |
| ENSG00000280483 | 4.2656792   | 0.216416699          | 0.0432161187 | -0.0153808747        | 0.884632479  | -0.011511652         | 0.913423515  | 0.08938131           | 0.3986312692 | NA          |
| ENSG00000280486 | 17.3746331  | -0.260547321         | 0.0471094313 | -0.2072890396        | 0.112996560  | -0.147038786         | 0.260963489  | -0.17032678          | 0.1909502470 | AC005329.3  |
| ENSG00000280502 | 2.0517796   | -0.189063822         | 0.0322990519 | -0.0314467454        | 0.723431626  | -0.009971134         | 0.910586940  | -0.01532360          | 0.8626465032 | Metazoa_SRP |
| ENSG00000280605 | 2.8427422   | -0.043398360         | 0.6867644979 | 0.0169792218         | 0.874852687  | 0.048152866          | 0.655006600  | -0.28677203          | 0.0065209226 | NA          |
| ENSG00000280670 | 71.8728973  | 0.281362927          | 0.0058308269 | 0.0269448651         | 0.791072344  | -0.019321940         | 0.849308819  | 0.06947108           | 0.4929652304 | CCDC163     |
| ENSG00000280710 | 3.4224108   | -0.203319615         | 0.0366969130 | -0.2205248238        | 0.023073256  | -0.043405230         | 0.656175910  | -0.11505558          | 0.2356885509 | AL139035.1  |
| ENSG00000280721 | 8.9870089   | 0.215465257          | 0.0438836477 | 0.1979865824         | 0.063188535  | 0.214149041          | 0.044409941  | 0.17595064           | 0.0972034963 | LINC01943   |
| ENSG00000280804 | 6.3264886   | -0.266424035         | 0.0220318838 | -0.2064967802        | 0.075401457  | -0.210621408         | 0.069466893  | -0.13600684          | 0.2401019137 | NA          |
| ENSG00000280953 | 0.8008446   | -0.008492992         | 0.8896239483 | 0.0002895445         | 0.996226056  | 0.076933860          | 0.209900616  | 0.26927582           | 0.0000142904 | LINC01163   |
| ENSG00000280992 | 2.9794678   | -0.014624898         | 0.8794392221 | -0.2111981645        | 0.027057755  | 0.008932887          | 0.926008510  | -0.06607894          | 0.4895539745 | NA          |
| ENSG00000281026 | 199.7651253 | 0.033541891          | 0.7916723435 | 0.0654012016         | 0.606124678  | 0.155496540          | 0.220184271  | 0.31854998           | 0.0118520864 | N4BP2L2-IT2 |
| ENSG00000281079 | 2.3051236   | 0.107771309          | 0.1923099208 | 0.0966848082         | 0.241179596  | 0.175794713          | 0.033335441  | 0.09813846           | 0.2328403687 | NA          |
| ENSG00000281087 | 16.5393472  | -0.291374342         | 0.0200633779 | 0.0147787987         | 0.905031749  | 0.010500265          | 0.932541069  | -0.14516286          | 0.2438426323 | AC135068.6  |
| ENSG00000281100 | 10.6813490  | 0.089202013          | 0.4381645444 | 0.1772133294         | 0.122685750  | 0.242325768          | 0.034853571  | 0.20830763           | 0.0683953355 | AC105749.1  |
| ENSG00000281267 | 3.3109277   | -0.214914521         | 0.0352102916 | -0.0646296650        | 0.527761064  | -0.031605786         | 0.757430605  | -0.12137054          | 0.2331470909 | NA          |
| ENSG00000281325 | 2.1608374   | -0.117696499         | 0.1586990474 | -0.0264654186        | 0.751846460  | -0.090508790         | 0.277610610  | -0.17016502          | 0.0401588450 | NA          |
| ENSG00000281344 | 9.4494598   | 0.106528128          |              |                      |              |                      |              |                      |              |             |
