# Supplementary material for: Nuclear Receptor Subfamily 4A Signaling as a Key Disease Pathway of CD1c+ Dendritic Cell Dysregulation in Systemic Sclerosis
Source: PubMed Central journal article supplement — Arthritis Rheumatol. 2022 Dec 8;75(2):279–92. doi: 10.1002/art.42319 (PMC10108054; doi:10.1002/art.42319), 2022-12-08
Supplement: ART-75-279-s003.pdf [file ART-75-279-s003.pdf]

|                         | RNA-sequencing cohort |            |            |            |            | RT-qPCR validation |            | FACS cohort |            |
|-------------------------|-----------------------|------------|------------|------------|------------|--------------------|------------|-------------|------------|
|                         | HC (12)               | eaSSc (12) | ncSSc (12) | lcSSc (12) | dcSSc (12) | HC (7)             | dcSSc (6)  | HC (11)     | dcSSc (12) |
| <b>Age (years)</b>      | 53 (49-66)            | 60 (42-77) | 53 (49-60) | 61 (52-65) | 53 (48-58) | 46 (38-51)         | 45 (37-55) | 44 (35-54)  | 56 (50-64) |
| <b>Female, n (%)</b>    | 10 (83)               | 10 (83)    | 12 (100)   | 12 (100)   | 7 (58)     | 7 (100)            | 6 (100)    | 3 (25)      | 3 (23)     |
| <b>ANA, n pos (%)</b>   | -                     | 10 (83)    | 10 (83)    | 11 (92)    | 11 (92)    | -                  | 5 (83)     | -           | 12 (100)   |
| <b>ACA, n pos (%)</b>   | -                     | 7 (58)     | 7 (58)     | 10 (83)    | 2 (17)     | -                  | 0 (0)      | -           | 1 (8)      |
| <b>Sci70, n pos (%)</b> | -                     | 1 (8)      | 1 (8)      | 3 (25)     | 3 (25)     | -                  | 4 (67)     | -           | 5 (42)     |
| <b>mRSS</b>             | -                     | -          | -          | 4 (3-6)    | 17 (10-22) | -                  | 10 (7-11)  | -           | 12 (10-13) |
| <b>Disease duration</b> | -                     | -          | 5 (2-7)    | 20 (11-30) | 7 (2-12)   | -                  | 10 (2-15)  | -           | 5 (2-6)    |

**Supplementary Table 1.** Clinical characteristics of subjects enrolled in the study. Reported values indicate the number (n) of individuals, with the (%) for each parameter. For age, mRSS and disease duration (in years), the median with interquartile range is given. ANA, anti-nuclear antibodies; ACA, anticentromere antibodies; Sci70, anti-topoisomerase antibodies; mRSS, modified Rodnan skin score; HC, healthy controls; eaSSc, early SSc; ncSSc, non-cutaneous SSc; lcSSc, limited cutaneous SSc; dcSSc, diffuse cutaneous SSc; pos, positivity.

| <b>Gene</b> | <b>Forward</b>        | <b>Reverse</b>         |
|-------------|-----------------------|------------------------|
| GUSB        | CACCAGGGACCATCCAATACC | GCAGTCCAGCGTAGTTGAAAAA |
| NR4A1       | ACTGCCCTGTGGACAAGAG   | CTGTTCCGACAACCTTCCTTC  |
| NR4A2       | GGACTCCCCATTGCTTTTC   | AGGCGAGGACCCATACTG     |
| NR4A3       | CTGCCCAGTAGACAAGAGAC  | CTCCTCCCTTTCAGACTATC   |
| IL-6        | GGCACTGGCAGAAAACAACC  | GCAAGTCTCCTCATTGAATCC  |

**Supplementary Table 2.** Gene specific primers used for RT-qPCR

|                  | <b>Antibody</b>            | <b>Label</b> | <b>Clone</b> | <b>Company</b>    |
|------------------|----------------------------|--------------|--------------|-------------------|
| PBMC panel       | Fixable viability          | APC-ef780    | N.A.         | eBioscience       |
|                  | Surface CD11c              | PerCP-Cy5.5  | 3.9          | Thermo Scientific |
|                  | Surface CD1c               | APC          | AD5-8E7      | Miltenyi          |
|                  | Surface CD19               | AF700        | HIB19        | eBioscience       |
|                  | Surface CD56               | AF700        | B159         | BD                |
|                  | Surface CD3                | PE/Cy7       | UCHT1        | Biologend         |
|                  | Surface CD4                | BV510        | RPA-T4       | Biologend         |
|                  | Surface HLA-DR             | BV605        | G46-6        | BD                |
|                  | Surface CD14               | BV785        | M5E2         | Biologend         |
|                  | Intracellular IL-6         | PE           | MQ2-6A3      | BD                |
| Co-culture panel | Fixable viability          | APC-ef780    | N.A.         | eBioscience       |
|                  | Surface CD3                | AF700        | UCHT1        | Biologend         |
|                  | Surface CD4                | AF488        | RPA-T4       | BD                |
|                  | Surface CD1c               | APC          | AD5-8E7      | Miltenyi          |
|                  | Intracellular IFN $\gamma$ | PE           | 4S.B3        | BD                |

**Supplementary Table 3.** Antibody panels for used for flow cytometry .
