# Supplementary material for: Nuclear Receptor Subfamily 4A Signaling as a Key Disease Pathway of CD1c+ Dendritic Cell Dysregulation in Systemic Sclerosis
Source: PubMed Central journal article supplement — Arthritis Rheumatol. 2022 Dec 8;75(2):279–92. doi: 10.1002/art.42319 (PMC10108054; doi:10.1002/art.42319), 2022-12-08
Supplement: ART-75-279-s006.pdf [file ART-75-279-s006.pdf]

| Condition    | ID         | Description                                                               | GeneRatio | BgRatio   | pvalue      | p.adjust    | geneID                                                                                                                                                                                                                                                                                                                                                                                                                                                                                                                                                                                                                                                                                                   |
|--------------|------------|---------------------------------------------------------------------------|-----------|-----------|-------------|-------------|----------------------------------------------------------------------------------------------------------------------------------------------------------------------------------------------------------------------------------------------------------------------------------------------------------------------------------------------------------------------------------------------------------------------------------------------------------------------------------------------------------------------------------------------------------------------------------------------------------------------------------------------------------------------------------------------------------|
| NR4A1 Medium | GO:0060078 | regulation of postsynaptic membrane potential                             | 16/559    | 156/21081 | 4.17528E-06 | 0.01652767  | DVL1/PRKCZ/WNT7A/CHRNA9/GABRA2/CHRNA2/SHANK2/KCNA1/GABRA5/C15orf59/ABAT/GRIN2A/5E26/SH3GL1/SLC8A2/SHANK1                                                                                                                                                                                                                                                                                                                                                                                                                                                                                                                                                                                                 |
| NR4A1 Medium | GO:0007613 | memory                                                                    | 14/559    | 132/21081 | 1.12392E-05 | 0.016527667 | PRKCZ/SLC6A1/ARC/RASGRF1/GRIN2A/JPH3/ITGA3/INSR/CIC/SLC8A2/SHANK1/SHISA7/COMT/PLA2G6                                                                                                                                                                                                                                                                                                                                                                                                                                                                                                                                                                                                                     |
| NR4A1 Medium | GO:0050808 | synapse organization                                                      | 30/559    | 479/21081 | 1.38226E-05 | 0.016527667 | DVL1/IGSF21/EPHB2/PTPRF/BCAN/IGFN1/EPHA4/NGEF/SLC6A1/WNT7A/LAMB2/GABRA2/THBS2/ELFN1/SDK1/ADGRB1/ARC/ARHGAP22/SHANK2/ITGAM/PAFAH1B1/SEZ6/ITGA3/SDK2/C3/INSR/SLC8A2/SHANK1/SHISA7/NEFH                                                                                                                                                                                                                                                                                                                                                                                                                                                                                                                     |
| NR4A1 Medium | GO:0099565 | chemical synaptic transmission, postsynaptic                              | 13/559    | 118/21081 | 1.5261E-05  | 0.016527667 | DVL1/PRKCZ/WNT7A/CHRNA9/CHRNA2/SHANK2/C15orf59/ABAT/GRIN2A/SEZ6/SH3GL1/SLC8A2/SHANK1                                                                                                                                                                                                                                                                                                                                                                                                                                                                                                                                                                                                                     |
| NR4A1 Medium | GO:0001505 | regulation of neurotransmitter levels                                     | 20/559    | 261/21081 | 2.35584E-05 | 0.020411015 | DVL1/SLC1A7/SNAP47/SLC6A1/WNT7A/CPLX1/GABRA2/CAMK2A/GRM4/SLC22A2/SLC22A3/GPER1/NC1/CHAT/SYT7/TRIM9/ABAT/SYT3/COMT/SYN3                                                                                                                                                                                                                                                                                                                                                                                                                                                                                                                                                                                   |
| NR4A1 Medium | GO:0006836 | neurotransmitter transport                                                | 19/559    | 244/21081 | 3.00515E-05 | 0.021697193 | DVL1/SLC1A7/SNAP47/SLC6A1/WNT7A/CPLX1/GABRA2/CAMK2A/GRM4/SLC22A2/SLC22A3/GPER1/IC1/NC1/CHAT/SYT7/TRIM9/SYT3/SYN3                                                                                                                                                                                                                                                                                                                                                                                                                                                                                                                                                                                         |
| NR4A1 Medium | GO:0097061 | dendritic spine organization                                              | 11/559    | 94/21081  | 3.90279E-05 | 0.024152695 | DVL1/EPHB2/EPHA4/NGEF/WNT7A/ARC/SHANK2/PAFAH1B1/ITGA3/INSR/SHANK1                                                                                                                                                                                                                                                                                                                                                                                                                                                                                                                                                                                                                                        |
| NR4A1 Medium | GO:1904062 | regulation of cation transmembrane transport                              | 24/559    | 365/21081 | 4.63468E-05 | 0.025096777 | KCNAB2/LRR38/EPHB2/GSTM2/DYSF/GPER1/HECW1/DPP6/ARC/KCNQ1/KCNC1/SHANK2/KCNA1/RASGRF1/CEMIP/GRIN2A/JPH3/CACNG1/DNM2/SHANK1/CACNG6/SHISA7/MIR133A2/PLA2G6                                                                                                                                                                                                                                                                                                                                                                                                                                                                                                                                                   |
| NR4A1 Medium | GO:0106027 | neuron projection organization                                            | 11/559    | 102/21081 | 8.3244E-05  | 0.034504995 | DVL1/EPHB2/EPHA4/NGEF/WNT7A/ARC/SHANK2/PAFAH1B1/ITGA3/INSR/SHANK1                                                                                                                                                                                                                                                                                                                                                                                                                                                                                                                                                                                                                                        |
| NR4A1 Medium | GO:0060997 | dendritic spine morphogenesis                                             | 9/559     | 69/21081  | 8.36198E-05 | 0.034504995 | DVL1/EPHB2/EPHA4/NGEF/WNT7A/ARC/SHANK2/PAFAH1B1/SHANK1                                                                                                                                                                                                                                                                                                                                                                                                                                                                                                                                                                                                                                                   |
| NR4A1 Medium | GO:0008277 | regulation of G protein-coupled receptor signaling pathway                | 14/559    | 159/21081 | 8.98194E-05 | 0.034504995 | GNGA4/APELA/CAMK2A/GPER1/RGS3/GRK5/NECAB2/GNG7/C3/DNM2/CLK5/CLK6/CLK14/MIR133A2                                                                                                                                                                                                                                                                                                                                                                                                                                                                                                                                                                                                                          |
| NR4A1 Medium | GO:0045745 | positive regulation of G protein-coupled receptor signaling pathway       | 6/559     | 29/21081  | 9.55817E-05 | 0.034504995 | GPER1/NECAB2/C3/CLK5/CLK6/CLK14                                                                                                                                                                                                                                                                                                                                                                                                                                                                                                                                                                                                                                                                          |
| NR4A1 Medium | GO:0046485 | ether lipid metabolic process                                             | 5/559     | 19/21081  | 0.000110002 | 0.036656052 | FAR1/PAFAH1B1/PLA2G4C/TMEM189/PLA2G6                                                                                                                                                                                                                                                                                                                                                                                                                                                                                                                                                                                                                                                                     |
| NR4A1 Medium | GO:0050806 | positive regulation of synaptic transmission                              | 16/559    | 205/21081 | 0.000122053 | 0.037766797 | DVL1/PRKCZ/EPHB2/KISS1/SNAP47/EPHA4/WNT7A/GPER1/ARC/SYT7/SHANK2/ABAT/GRIN2A/SLC8A2/SHANK1/SHISA7                                                                                                                                                                                                                                                                                                                                                                                                                                                                                                                                                                                                         |
| NR4A1 Medium | GO:0060996 | dendritic spine development                                               | 11/559    | 111/21081 | 0.00017855  | 0.043288035 | DVL1/EPHB2/EPHA4/NGEF/WNT7A/CAMK2A/SDK1/ARC/SHANK2/PAFAH1B1/SHANK1                                                                                                                                                                                                                                                                                                                                                                                                                                                                                                                                                                                                                                       |
| NR4A1 Medium | GO:0006662 | glycerol ether metabolic process                                          | 5/559     | 21/21081  | 0.000184236 | 0.043288035 | FAR1/PAFAH1B1/PLA2G4C/TMEM189/PLA2G6                                                                                                                                                                                                                                                                                                                                                                                                                                                                                                                                                                                                                                                                     |
| NR4A1 Medium | GO:0071472 | cellular response to salt stress                                          | 4/559     | 12/21081  | 0.00020436  | 0.044264306 | XRCC5/EFHD1/AQP1/TRPV4                                                                                                                                                                                                                                                                                                                                                                                                                                                                                                                                                                                                                                                                                   |
| NR4A1 Medium | GO:0017158 | regulation of calcium ion-dependent exocytosis                            | 7/559     | 48/21081  | 0.000254585 | 0.049265159 | ZP3/SYT13/SYT7/TRIM9/CACNA1H/SYT3/CACNA1I                                                                                                                                                                                                                                                                                                                                                                                                                                                                                                                                                                                                                                                                |
| NR4A1 Medium | GO:0070588 | calcium ion transmembrane transport                                       | 21/559    | 335/21081 | 0.000261565 | 0.049265159 | GSTM2/ANXA9/DYSF/CHRNA9/GPER1/TRPM6/NC1/TRPV4/CEMIP/CACNA1H/GRIN2A/PKD1L2/JPH3/CACNG1/CACNA1A/SLC8A2/TRPM4/CACNG6/MIR133A2/PLA2G6/CACNA1I                                                                                                                                                                                                                                                                                                                                                                                                                                                                                                                                                                |
| NR4A1 R848   | GO:0019932 | second-messenger-mediated signaling                                       | 22/295    | 494/21081 | 2.01271E-06 | 0.006662063 | ADGRB2/EDN2/CASQ1/SELP/HDAC4/ADCY5/ADCYAP1R1/ADGRB1/UCN3/CALML5/INPP5A/GUCY1A2/DRD2/CMKLR1/NOS1/ADGRG5/MCSR/GALR1/GIPR/TRPM4/PDE9A/TRPM2                                                                                                                                                                                                                                                                                                                                                                                                                                                                                                                                                                 |
| NR4A1 R848   | GO:0007188 | adenylate cyclase-modulating G protein-coupled receptor signaling pathway | 14/295    | 249/21081 | 1.19666E-05 | 0.019804761 | ADGRB2/ADCY5/GRM4/GNA12/ADCYAP1R1/VIPR2/ADGRB1/UCN3/DRD2/NOS1/ADGRG5/MCSR/GALR1/GIPR                                                                                                                                                                                                                                                                                                                                                                                                                                                                                                                                                                                                                     |
| NR4A1 R848   | GO:0014854 | response to inactivity                                                    | 4/295     | 14/21081  | 3.36721E-05 | 0.025309215 | CASQ1/IL10/HDAC4/DRD2                                                                                                                                                                                                                                                                                                                                                                                                                                                                                                                                                                                                                                                                                    |
| NR4A1 R848   | GO:0046879 | hormone secretion                                                         | 16/295    | 347/21081 | 3.37748E-05 | 0.025309215 | POMC/ADCY5/CCKAR/UCN3/BAD/DRD2/TRPV4/SIRT4/HNF1A/AACS/GALR1/KCNG2/CACNA1A/GIPR/TRPM4/PLA2G6                                                                                                                                                                                                                                                                                                                                                                                                                                                                                                                                                                                                              |
| NR4A1 R848   | GO:0009914 | hormone transport                                                         | 16/295    | 356/21081 | 4.58777E-05 | 0.025309215 | POMC/ADCY5/CCKAR/UCN3/BAD/DRD2/TRPV4/SIRT4/HNF1A/AACS/GALR1/KCNG2/CACNA1A/GIPR/TRPM4/PLA2G6                                                                                                                                                                                                                                                                                                                                                                                                                                                                                                                                                                                                              |
| NR4A1 R848   | GO:0035725 | sodium ion transmembrane transport                                        | 11/295    | 183/21081 | 5.65879E-05 | 0.025712912 | SCNN1D/SLC6A19/SLC20A2/WNK2/SLC3A2/SCNN1A/NOS1/CACNA1H/TRPM4/TRPM2/CACNA1I                                                                                                                                                                                                                                                                                                                                                                                                                                                                                                                                                                                                                               |
| NR4A1 R848   | GO:0006814 | sodium ion transport                                                      | 13/295    | 253/21081 | 6.2146E-05  | 0.025712912 | SCNN1D/SLC6A19/SLC20A2/WNK2/SLC3A2/DRD2/SCNN1A/NOS1/CACNA1H/SLC38A10/TRPM4/TRPM2/CACNA1I                                                                                                                                                                                                                                                                                                                                                                                                                                                                                                                                                                                                                 |
| NR4A1 R848   | GO:0051480 | regulation of cytosolic calcium ion concentration                         | 16/295    | 373/21081 | 7.95074E-05 | 0.028327967 | EDN2/CASQ1/ADCY5/ADCYAP1R1/FZD9/CDH23/DRD2/CMKLR1/TRPV4/NOS1/GALR1/CACNA1A/GIPR/TRPM4/TRPM2/PLA2G6                                                                                                                                                                                                                                                                                                                                                                                                                                                                                                                                                                                                       |
| NR4A1 R848   | GO:0050796 | regulation of insulin secretion                                           | 11/295    | 204/21081 | 0.000149109 | 0.036061725 | ADCY5/UCN3/BAD/DRD2/SIRT4/AACS/KCNG2/CACNA1A/GIPR/TRPM4/PLA2G6                                                                                                                                                                                                                                                                                                                                                                                                                                                                                                                                                                                                                                           |
| NR4A1 R848   | GO:0010759 | positive regulation of macrophage chemotaxis                              | 4/295     | 20/21081  | 0.000152527 | 0.036061725 | PTK2/CMKLR1/TRPV4/IL34                                                                                                                                                                                                                                                                                                                                                                                                                                                                                                                                                                                                                                                                                   |
| NR4A1 R848   | GO:0099601 | regulation of neurotransmitter receptor activity                          | 7/295     | 84/21081  | 0.000176618 | 0.038973616 | SLURP1/SHANK2/NPTX1/SHANK1/SHISA7/DLGAP4/MAPK8IP2                                                                                                                                                                                                                                                                                                                                                                                                                                                                                                                                                                                                                                                        |
| NR4A1 R848   | GO:0098742 | cell-cell adhesion via plasma-membrane adhesion molecules                 | 13/295    | 288/21081 | 0.000225649 | 0.041494299 | SELP/IL10/CELSR3/FAT1/SDK1/CRB2/CDH23/CDHR1/IGSF9B/CDH5/MAG/CLDN14/ARVCF                                                                                                                                                                                                                                                                                                                                                                                                                                                                                                                                                                                                                                 |
| NR4A2 Medium | GO:0086010 | membrane depolarization during action potential                           | 20/3033   | 38/21081  | 3.31817E-08 | 0.000164942 | SLC8A1/SCN3A/SCN1A/SCN9A/SCN7A/SCN5A/CACNA1D/SLMAP/ANK2/CACNA2D1/KCNH2/CACNB2/SCN4B/SCN2B/MIR208A/HCN4/CACNA1H/KCNJ2/TRPM4/CACNA1I                                                                                                                                                                                                                                                                                                                                                                                                                                                                                                                                                                       |
| NR4A2 Medium | GO:0050770 | regulation of axonogenesis                                                | 58/3033   | 199/21081 | 5.53874E-08 | 0.000164942 | EPHB2/MACF1/DAB1/TNR/CNTN2/SEMA4F/ZE2B/CHN1/BMPR2/MAP2/FN1/EPHA4/STK25/WNT7A/GOLGA4/TRAK1/SEMA3F/SEMA3B/ROBO1/PLXND1/SKIL/EPHB3/SLIT2/RUFY3/MAP1B/EFNA5/SEMA6A/TUBB2B/PLXNA4/KIF13B/PTK2/SEMA4D/OLFM1/NRP1/CXCL12/BRSK2/LRP4/PAK1/RAB21/PLXNC1/MP2/SIPA1L1/PSEN1/RAB11A/LINGO1/NTRK3/SEMA4B/MT3/IST1/PAFAH1B1/NTN1/CDH2/SEMA6B/P/TPRS/DNM2/BRSK1/ADNP/TIAM1                                                                                                                                                                                                                                                                                                                                              |
| NR4A2 Medium | GO:0050808 | synapse organization                                                      | 112/3033  | 479/21081 | 7.5975E-08  | 0.000164942 | EPHB2/PTPRF/TNR/IGFN1/NFASC/CNTN2/EGLN1/NRXN1/CHRNA1/NRP2/ERBB4/EPHA4/RAB17/KIF1A/SLC6A1/WNT7A/CX3CR1/DAG1/BSN/SEMA3F/ARF4/KALRN/PLXND1/PFN2/DHX36/SLITRK3/NLGN1/EPHB3/IL1RAP/OPA1/DOK7/GABRA2/REST/SEPT11/CDH9/GDNF/MAP1B/EFNA5/MYOT/PCDHGC5/SYNPO/GABRG2/LRFN2/ADGRF1/THBS2/ELFN1/SDK1/FNTA/SYBU/PTK2/ARHGAP39/SEMA4D/DAB2IP/CEL/CANB2/NRP1/ARHGAP22/ZNF365/SRGN/SPOCK2/INA/NEURL1/LRP4/NRXN2/CFL1/SPTBN2/SHANK2/VS1/M5/MTMR2/CNTN5/NECTIN1/DNM1/SLITRK6/FARP1/ACTN1/SLC8A3/SIPA1L1/PSEN1/UBE3A/GABRB3/MYO5A/NTRK3/ITGAM/PAFAH1B1/DLG4/MYH10/NTN1/SEZ6/NEUROD2/BAIAP2/AFG3L2/CDH2/CBLN2/PALM/PTPRS/C3/INSR/UNC13A/LRFN1/SLC8A2/PPFIA3/LRRC4B/SHISA7/ZMYND8/STAU1/ADNP/CB/LN4/APP/TIAM1/ITSN1/WRB/SEZ6L |
| NR4A2 Medium | GO:0007015 | actin filament organization                                               | 109/3033  | 467/21081 | 1.24582E-07 | 0.000188126 | ESPN/WNT4/MARCKSL1/RHOC/ACTN2/CDC42EP3/PRKCE/ALMS1/CAPG/RND3/NEB/CUL1/ESPN/ARPC4/CLASP2/VILL/XIRP1/TF/PFN2/SLIT2/KIAA1211/RUFY3/SHROOM3/ARFP1/SORBS2/FAT1/IQGAP2/FCHSD1/DPYSL3/SYNPO/CYFIP2/PHACTR1/CARMIL1/PACSIN1/MYO6/MARCKS/MICALL2/ELMO1/HIP1/CCL24/BAIAP2L1/ARPC1A/MET/MTPN/ACTR3B/BIN3/PTK2B/ARFGEF1/FAM49B/KANK1/JAK2/TPM2/FAM171A1/SVIL/NRP1/CXCL12/MCU/ADD3/SWAP70/MICAL2/USH1C/GAS2/CFL1/SPTBN2/ARRB1/MYO7A/P                                                                                                                                                                                                                                                                                 |

|              |            |                                                              |         |           |             |             |                                                                                                                                                                                                                                                                                                                                                                                                                                                                                                                                                                                                                                      |
|--------------|------------|--------------------------------------------------------------|---------|-----------|-------------|-------------|--------------------------------------------------------------------------------------------------------------------------------------------------------------------------------------------------------------------------------------------------------------------------------------------------------------------------------------------------------------------------------------------------------------------------------------------------------------------------------------------------------------------------------------------------------------------------------------------------------------------------------------|
|              |            |                                                              |         |           |             |             | AK1/NOX4/RDX/EP58/AVIL/GAS2L3/WASHC3/HSP90B1/CORO1C/DIAPH3/SPTB/ACTN1/TGFB3/EVL/MY05A/TPM1/SMAD3/CORO2B/BBS4/PSTPIP1/PYCARD/ALOX15/MYO15A/TNFAIP1/SSH2/MYO1D/BAIAP2/ARHGAP28/FHOD3/PSTPIP2/ARHGFE18/KANK3/MYO1F/ICAM1/TPM4/GMFG/CCDC155/ARHGAP40/PREX1/MICAL3/GAS2L1/NF2/BAIAP2L2                                                                                                                                                                                                                                                                                                                                                    |
| NR4A2 Medium | GO:0032535 | regulation of cellular component size                        | 98/3033 | 409/21081 | 1.44423E-07 | 0.000188126 | ATP13A2/HP1BP3/MACF1/VAV3/TNR/CNTN2/ACTN2/CD42EP3/PRKCE/SEMA4F/CAPG/NEB/BMPR2/CREB1/MAP2/FN1/ARPC4/WNT7A/GOLGA4/VILL/SEMA3F/SEMA3B/SLC12A8/PFN2/SLIT2/KIAA1211/RUFY3/ARFIP1/MAP1B/IQGAP2/EFNA5/SEMA6A/FCHSD1/CYFIP2/CDHR2/CARMIL1/AQP1/CCL24/BAIAP2L1/ARPC1A/PLXNA4/MTPN/ACTR3B/PTK2B/RB1CC1/ARFGEF1/DEPTOR/FAM49B/KANK1/SEMA4D/VAV2/OLFM1/SVIL/NRP1/CXCL12/KCNMA1/ADD3/SWAP70/USH1C/CFL1/SPTBN2/PAK1/RDX/EP58/RARG/AVIL/RAB21/SPTB/EVL/AKT1/RAB11A/BBS4/NTRK3/SEMA4B/PYCARD/MT3/IST1/PAFAH1B1/RAP1GAP2/ALOX15/NTN1/SSH2/SLC9A3R1/RPTOR/BAIAP2/ARHGAP28/FHOD3/SEMA6B/PTPRS/PEX11G/KANK3/ICAM1/DNM2/GMFG/ARHGAP40/PREX1/ADNP/BAIAP2L2 |
| NR4A2 Medium | GO:0007411 | axon guidance                                                | 76/3033 | 297/21081 | 2.30966E-07 | 0.000248407 | EPHA8/EPHB2/EPHA10/DAB1/NEXN/TNR/LHX4/NFASC/CNTN2/FEZ2/SOS1/NRXN1/SEMA4F/CHN1/BMPR2/NRP2/EPHA4/GBX2/CNTN4/CELSR3/DAG1/SEMA3F/SEMA3B/ROBO1/PLXND1/PIK3CB/EPHB3/SLIT2/APBB2/PALLD/TRIO/GDNF/FOXD1/EFNA5/SEMA6A/MYOT/SLIT3/TUBB2B/PLXNA4/MATN2/PTK2/NFI/B/SEMA4D/PTCH1/LHX3/NOTCH1/PRKCO/GATA3/NRP1/CXCL12/PAX6/SPTBN2/NECTIN1/PLXNC1/NTN4/MYCBP2/SPTB/NRXN3/EVL/NEO1/SEMA4B/MYH10/NTN1/LAMA1/PTPRM/LAMA3/SMAD4/EFNA2/S/EMA6B/PTPRA/GFRA4/VSTM2L/PLCG1/BMP7/LAMA5/APP                                                                                                                                                                   |
| NR4A2 Medium | GO:0097485 | neuron projection guidance                                   | 76/3033 | 298/21081 | 2.66981E-07 | 0.000248407 | EPHA8/EPHB2/EPHA10/DAB1/NEXN/TNR/LHX4/NFASC/CNTN2/FEZ2/SOS1/NRXN1/SEMA4F/CHN1/BMPR2/NRP2/EPHA4/GBX2/CNTN4/CELSR3/DAG1/SEMA3F/SEMA3B/ROBO1/PLXND1/PIK3CB/EPHB3/SLIT2/APBB2/PALLD/TRIO/GDNF/FOXD1/EFNA5/SEMA6A/MYOT/SLIT3/TUBB2B/PLXNA4/MATN2/PTK2/NFI/B/SEMA4D/PTCH1/LHX3/NOTCH1/PRKCO/GATA3/NRP1/CXCL12/PAX6/SPTBN2/NECTIN1/PLXNC1/NTN4/MYCBP2/SPTB/NRXN3/EVL/NEO1/SEMA4B/MYH10/NTN1/LAMA1/PTPRM/LAMA3/SMAD4/EFNA2/S/EMA6B/PTPRA/GFRA4/VSTM2L/PLCG1/BMP7/LAMA5/APP                                                                                                                                                                   |
| NR4A2 Medium | GO:0007163 | establishment or maintenance of cell polarity                | 62/3033 | 230/21081 | 4.29139E-07 | 0.000349373 | CLIC4/KIF2C/DOC7/GP5M2/RHOC/SNX27/LMNA/RAB10/CYP26B1/RND3/PARD3B/MAP2/STK25/WNT7A/CLASP2/ARF4/RUFY3/FAT1/ERBIN/MAP1B/CTNNA1/WWC1/DST/GJA1/KIF25/AQP1/PTK2B/ANK1/ARFGEF1/FAM49B/PTK2/DOCK8/KANK1/TEK/CRB2/MAPKAP1/GATA3/FRMD4A/ITGB1/BRSK2/INSC/PAX6/CKAP5/CFL1/TCIRG1/NUMA1/PAK1/AMOT1/JAM3/SPRY2/PAFAH1B1/LLGL1/BCAS3/SLC9A3R1/PFB1/LAMA1/MTCL1/MISP/SIPA1L3/BRSK1/PARVB/PARVG                                                                                                                                                                                                                                                      |
| NR4A2 Medium | GO:0035637 | multicellular organismal signaling                           | 58/3033 | 214/21081 | 8.22629E-07 | 0.000595309 | NPPA/CASQ1/ATP1B1/TNR/NFASC/RYR2/KCNK3/SLC8A1/CALM2/KCNIP3/SCN3A/SCN1A/SCN9A/SCN7A/CHRNA1/SLC4A3/ATP2B2/SCN5A/CACNA1D/FGF12/ANK2/NUP155/PDE4D/GLRA1/GJA1/GPER1/CACNA2D1/AKAP9/CNTNAP2/KCNH2/CACNB2/KCNIP2/STIM1/SCN4B/SCN2B/JAM3/KCNMB4/MIR208A/SLC8A3/RYR3/HCN4/NTRK3/CACNA1H/OTOA/PAFAH1B1/ATP2A3/GJD3/CACNG4/CACNG1/KCNJ2/RYR1/ATP1A3/SLC8A2/TRPM4/MYH14/CACNG8/SOD1/CACNA1                                                                                                                                                                                                                                                       |
| NR4A2 Medium | GO:0010769 | regulation of cell morphogenesis involved in differentiation | 79/3033 | 331/21081 | 2.65093E-06 | 0.001726552 | EPHB2/MACF1/DAB1/TNR/CNTN2/SEMA4F/ZEB2/CHN1/BMPR2/MAP2/FN1/EPHA4/KIF1A/STK25/WNT7A/GOLGA4/TRAK1/SEMA3F/SEMA3B/ROBO1/KALRN/PLXND1/DHX36/SKIL/NLGN1/EPHB3/OPA1/SLIT2/RUFY3/MAP1B/EFNA5/SEMA6A/TUBB2B/CARMIL1/HECW1/CUX1/PLXNA4/DOCK5/KIF13B/PTK2/KA NK1/SEMA4D/OLFM1/NRP1/CXCL12/BRSK2/LRP4/CFL1/PAK1/DNM1L/RAB21/PLXNC1/CORO1C/MYCBP2/SIPA1L1/PSEN1/UBE3A/RAB11A/PARP6/LINGO1/CHRNA3/NTRK3/SEMA4B/MT3/IST1/PAFAH1B1/NTN1/BAIAP2/P4HB/CDH2/SEMA6B/PTPRS/DNM2/ANKRD27/BRSK1/PREX1/ADNP/TIAM1/FBLN1                                                                                                                                      |
| NR4A2 Medium | GO:0048738 | cardiac muscle tissue development                            | 63/3033 | 248/21081 | 3.11643E-06 | 0.001845208 | TP73/NPPA/TGFB3/LMNA/TNNT2/EGLN1/ACTN2/RYR2/HNRNP/SLC8A1/MEIS1/NEB/XIRP2/CREB1/EBB4/HEG1/C3orf58/PDGFR/FGF2/SORBS2/JARID2/PI16/GJA1/FGFR1/MIR204/RXRA/NOTCH1/ITGB1/SOX6/CSRP3/WT1/FGF3/PAK1/TENM4/NOX4/LRRC10/FGF9/MIR17HG/MIR208A/MYH6/MYH7/SAV1/BMP4/YY1/DLL4/ALDH1A2/TPM1/AKAP13/MESP1/NPRL3/MYLK3/NDRG4/ZFPM1/KDM6B/MYH10/RAR A/KAT2A/FHOD3/SMAD4/PPP1R13L/JPH2/BMP7/MYO18B                                                                                                                                                                                                                                                      |
| NR4A2 Medium | GO:1990778 | protein localization to cell periphery                       | 85/3033 | 366/21081 | 3.62196E-06 | 0.001965819 | EPHB2/MACF1/TMEM59/GPSM2/RAB13/ATP1B1/NFASC/ACTN2/RAB10/PRKCE/ASB3/KCNIP3/DPP10/GRIP2/CLASP2/GOLGA4/DAG1/SLMAP/CPLX1/GAK/WDR19/MAPK10/ANK2/FCHO2/PACSIN1/MRAP2/EPB41L2/AFDN/GPER1/ADAM22/TSPAN33/DPP6/ANK1/IKKBK/EFR3A/PTCH1/STXB1/SEC16A/ABCA2/CACNB2/ITGB1/TSPAN15/ARL3/DCHS1/CSRP3/STX3/PACS1/NUMA1/RDX/PDZ3/GRIP1/CLIP1/RILPL1/TMED2/GAS6/NUMB/TTC7B/AKT1/PACS2/EHD4/MYO5A/RAB11A/NUBP1/STX1B/ATP2C2/TUSCS/RABEP1/DLG4/RAMP2/SKAP1/CACNG4/SLC9A3R1/RAB40B/EPB41L3/RAB12/CDH2/PALM/MISP/AKT2/EHD2/CACNG8/SMAD4/DNM2/PPP1R13L/JAG1/BMP7                                                                                            |
| NR4A2 Medium | GO:0048839 | inner ear development                                        | 55/3033 | 212/21081 | 6.58016E-06 | 0.003061184 | EPHB2/KCNQ4/PRRX1/KCNK3/PAX8/EPHA4/GBX2/TMIE/LRIG1/MCM2/OPA1/ADGRV1/DCANP1/MYO6/AHI1/DNA5/BMPER/FGFR1/CALB1/OC90/TMC1/LHX3/NOTCH1/GATA3/MYO3A/HMX2/DCHS1/USH1C/MYO7A/COL2A1/LRIG3/SLC17A8/FGF9/ATP8A2/SPRY2/SLITRK6/BMP4/TGFB3/ESRRB/JAG2/GABRB3/NTRK3/PAFAH1B1/DVL2/NTN1/MYO15A/NAGLU/SLC9A3R1/USH1G/TTC39G/ATP8B1/HPN/JAG1/SOD1/WRB                                                                                                                                                                                                                                                                                                |
| NR4A2 Medium | GO:0003205 | cardiac chamber development                                  | 48/3033 | 179/21081 | 9.58808E-06 | 0.003902946 | TGFB3/TNNT2/EGLN1/RYR2/LTBP1/SOS1/PAX8/XIRP2/BMPR2/NRP2/SCN5A/ROBO1/HEG1/PLXND1/SLIT2/ANK2/ADAMTS6/NDST1/SLIT3/MSX2/ADGRG6/DNAH11/NOS3/TEK/RXRA/NOTCH1/GATA3/NRP1/PDE2A/MIR17HG/MYH6/MYH7/SAV1/BMP4/HIF1A/DLL4/TPM1/MESP1/NPRL3/DCTNS5/ZFPM1/MYH10/RARA/SMAD4/DNM2/PPP1R13L/JAG1/BMP7                                                                                                                                                                                                                                                                                                                                                |
| NR4A2 Medium | GO:0007605 | sensory perception of sound                                  | 44/3033 | 161/21081 | 1.32136E-05 | 0.005062351 | ESPN/KCNQ4/CD14A/OTOF/ESPNL/OTOS/GRM7/ATP2B2/TMIE/CACNA1D/LRIG1/WFS1/HEXB/ADGRV1/ALDH7A1/MYO6/DFNA5/ATP6V0A4/FGFR1/TMC1/MYO3A/USH1C/NAV2/MYO7A/CNTNS5/COL2A1/EPYC/SLC17A8/SRRM4/SPRY2/SLITRK6/GABRB3/OTOA/MYO15A/SLC9A3R1/USH1G/LOXHD1/ATP8B1/ICAM1/HPN/MYH14/SOD1/WRB/TMPRSS3                                                                                                                                                                                                                                                                                                                                                       |
| NR4A2 Medium | GO:0048864 | stem cell development                                        | 28/3033 | 86/21081  | 1.55786E-05 | 0.005340197 | PEF1/KLHL12/SEMA4F/ZEB2/NRP2/ERBB4/FN1/HTR2B/GBX2/WNT7A/SEMA3F/SEMA3B/GDNF/SEMA6A/TCOF1/SEMA4D/NRP1/CFL1/CORO1C/BMP4/HIF1A/ALDH1A2/SEMA4B/MSI2/SEMA6B/JAG1/BMP7/LAMA5                                                                                                                                                                                                                                                                                                                                                                                                                                                                |

|              |            |                                                              |         |           |             |             |                                                                                                                                                                                                                                                                   |
|--------------|------------|--------------------------------------------------------------|---------|-----------|-------------|-------------|-------------------------------------------------------------------------------------------------------------------------------------------------------------------------------------------------------------------------------------------------------------------|
| NR4A2 Medium | GO:007272  | ensheathment of neurons                                      | 40/3033 | 144/21081 | 2.11937E-05 | 0.005386406 | NFASC/CNTN2/DEGS1/EIF2B4/NAB1/PIKFYVE/DAG1/ANK2/HEXB/SERINC5/ID4/PPARD/ADGRG6/ADAM22/TG/ABCA2/SBF2/MYRF/TENM4/MTMR2/IAM3/CD9/RARG/RNF10/SLC8A3/EIF2B2/AKT1/MYO5A/NTRK3/FA2H/TMEM98/RARA/EPB41L3/AFG3L2/ZNF24/AKT2/PRX/ATRN/CST7/SOD1                              |
| NR4A2 Medium | GO:008366  | axon ensheathment                                            | 40/3033 | 144/21081 | 2.11937E-05 | 0.005386406 | NFASC/CNTN2/DEGS1/EIF2B4/NAB1/PIKFYVE/DAG1/ANK2/HEXB/SERINC5/ID4/PPARD/ADGRG6/ADAM22/TG/ABCA2/SBF2/MYRF/TENM4/MTMR2/IAM3/CD9/RARG/RNF10/SLC8A3/EIF2B2/AKT1/MYO5A/NTRK3/FA2H/TMEM98/RARA/EPB41L3/AFG3L2/ZNF24/AKT2/PRX/ATRN/CST7/SOD1                              |
| NR4A2 Medium | GO:0046434 | organophosphate catabolic process                            | 42/3033 | 154/21081 | 2.16742E-05 | 0.005386406 | ACOT7/PLA2G5/INPP5B/XDH/INPP1/IDH1/ENTPD3/ABHD6/NUDT9/PDE5A/ENPP6/PDE4D/NUDT12/HI1NT1/NUDT3/NT5E/ENPP1/NUDT1/ENPP2/NUDT13/NT5C2/INPP5A/SMPD1/PDE2A/MTMR2/ACAT1/PLA2G4E/PLA2G4D/PLA2G4F/DUT/NUDT7/PLCG2/NT5M/CNP/IMPA2/PDE4C/APOC1/ABHD12/PLCG1/NTSR1/PDE9A/PLA2G6 |
| NR4A2 Medium | GO:0001755 | neural crest cell migration                                  | 21/3033 | 57/21081  | 2.18941E-05 | 0.005386406 | SEMA4F/ZEB2/NRP2/ERBB4/FN1/HTR2B/GBX2/SEMA3F/SEMA3B/GDNF/SEMA6A/SEMA4D/NRP1/CFL1/CORO1C/BMP4/HIF1A/SEMA4B/SEMA6B/BMP7/LAMA5                                                                                                                                       |
| NR4A2 R848   | GO:0099565 | chemical synaptic transmission, postsynaptic                 | 18/892  | 118/21081 | 2.31635E-06 | 0.005725192 | PRKCZ/RAB3GAP1/WNT7A/RIMS1/SHANK2/IGSF9B/CHRN4/GRIN2A/CHRNA4/SH3GL1/GRIK5/SLC8A2/SHANK1/CHRNA4                                                                                                                                                                    |
| NR4A2 R848   | GO:0060079 | excitatory postsynaptic potential                            | 17/892  | 108/21081 | 2.8296E-06  | 0.005725192 | PRKCZ/RAB3GAP1/WNT7A/RIMS1/SHANK2/CHRN4/GRIN2A/CHRNA4/SH3GL1/GRIK5/SLC8A2/SHANK1/CHRNA4                                                                                                                                                                           |
| NR4A2 R848   | GO:0006814 | sodium ion transport                                         | 28/892  | 253/21081 | 3.54063E-06 | 0.005725192 | SLC6A9/SLC5A9/SLC4A5/SERPINE2/SLC6A1/SLC6A20/SLC6A19/HECW1/SLC13A4/WNK2/TRPM5/NOS1/ATP12A/SLC24A1/CACNA1H/SLC6A2/CACNA1G/SCN4A/ATP4A/ATP1A3/SLC8A2/TRPM4/SLC4A11/BP1FA1/CACNA1                                                                                    |
| NR4A2 R848   | GO:0035725 | sodium ion transmembrane transport                           | 22/892  | 183/21081 | 1.04268E-05 | 0.012645091 | SLC6A9/SLC4A5/SLC6A1/SLC6A20/SLC6A19/HECW1/WNK2/TRPM5/NOS1/ATP12A/SLC24A1/CACNA1H/SLC6A2/CACNA1G/SCN4A/ATP4A/ATP1A3/SLC8A2/TRPM4/SLC4A11/BP1FA1/CACNA1                                                                                                            |
| NR4A2 R848   | GO:0042391 | regulation of membrane potential                             | 40/892  | 473/21081 | 2.73052E-05 | 0.015772972 | PRKCZ/KCNAB2/ACTN2/RAB3GAP1/BOK/WNT7A/CACNA1D/HTR3C/RIMS1/FZD9/DLD/KCNQ3/KCNK9/KCNQ1/KCNK1/SHANK2/IGSF9B/CHRN4/CACNA1H/GRIN2A/WWP2/CHRNA4/SH3GL1/GRIK5/SLC8A2/TRPM4/MYH14/SHANK1/CHRNA4/CACNA1                                                                    |
| NR4A2 R848   | GO:0098659 | inorganic cation import across plasma membrane               | 15/892  | 104/21081 | 3.14201E-05 | 0.015772972 | SLC6A1/SLC12A9/KCNK9/WNK2/TRPV4/ATP12A/SLC24A1/SLC12A4/TRPV3/ATP4A/ATP1A3/SLC8A2/TRPM4/SLC12A5/KCNJ4                                                                                                                                                              |
| NR4A2 R848   | GO:0099587 | inorganic ion import across plasma membrane                  | 15/892  | 104/21081 | 3.14201E-05 | 0.015772972 | SLC6A1/SLC12A9/KCNK9/WNK2/TRPV4/ATP12A/SLC24A1/SLC12A4/TRPV3/ATP4A/ATP1A3/SLC8A2/TRPM4/SLC12A5/KCNJ4                                                                                                                                                              |
| NR4A2 R848   | GO:0050808 | synapse organization                                         | 40/892  | 479/21081 | 3.62662E-05 | 0.015772972 | IGSF21/PTPRF/IGFN1/NGEF/RAB17/KIF1A/SLC6A1/WNT7A/PLXNB1/SEMA3F/EPH1/DOK7/THBS2/ELF1/N1/SDK1/CAMK2B/FZD9/SEMA3E/ADGRB1/SEMA4D/ANAPC2/SHANK2/IGSF9B/ACTN1/DLG4/SEZ6/SXK2/BAIAP2/C3/INSR/ARHGAP33/LRFN1/SLC8A2/LRRC4B/SHANK1/SHISA7/SYNDIG1/SEZ6L/WNT7B/NB2          |
| NR4A2 R848   | GO:0050770 | regulation of axonogenesis                                   | 22/892  | 199/21081 | 3.88586E-05 | 0.015772972 | STK25/WNT7A/PLXNB1/SEMA3F/PLXNA1/FSTL4/LIMK1/SEMA3E/DPYSL2/SEMA4D/OLFM1/ANAPC2/SHANK2/BRSK2/LRP1/LINGO1/RND2/STK11/SEMA6B/MEGF8/CDH4/PLXNB2                                                                                                                       |
| NR4A2 R848   | GO:0031646 | positive regulation of nervous system process                | 12/892  | 71/21081  | 3.91909E-05 | 0.015772972 | PRKCZ/WNT7A/RIMS1/SHANK2/IGSF9B/CHRN4/DLG4/BAIAP2/SHANK1/CST7/S100B/SOX10                                                                                                                                                                                         |
| NR4A2 R848   | GO:0007018 | microtubule-based movement                                   | 34/892  | 385/21081 | 4.56399E-05 | 0.015814237 | PRKCZ/NPHP4/CELSR2/KIF21B/KIF1A/MAP4/HTT/BLOC1S4/KIF25/DNAF5/NME8/HSPB1/LRRC6/WDR34/CFAP46/TRIP11/KLC1/SPG11/BBS4/AP3B2/MAPK8IP3/DRC7/DNAH2/KPNB1/TTL6/KIF19/QRICH2/DNAH17/STK11/MAP1S/SEMG1/PLTP/SUN2/CACNA1I                                                    |
| NR4A2 R848   | GO:0032535 | regulation of cellular component size                        | 35/892  | 409/21081 | 6.72901E-05 | 0.021761611 | ATP13A2/ACTN2/WNT7A/VILL/SEMA3F/FSTL4/CDHR2/ELN/LIMK1/SEMA3E/SLC12A9/DPYSL2/SEMA4D/AV2/OLFM1/ANAPC2/SHTN1/LIMA1/LRP1/TRPV4/EVL/BBS4/SLC12A4/RND2/RPTOR/BAIAP2/FHOD3/SEMA6B/KANK3/SPTBN4/MEGF8/ARHGAP40/SLC12A5/CDH4/WNT7B                                         |
| NR4A2 R848   | GO:0098742 | cell-cell adhesion via plasma-membrane adhesion molecules    | 27/892  | 288/21081 | 0.000100529 | 0.03047915  | IGSF21/PTPRF/CELSR2/IGFN1/PTPN23/FAT1/CDHR2/SDK1/CLDN3/CLDN15/CRB2/CDH23/CDHR1/DCHS1/ROBO4/IGSF9B/PKD1/CDH5/SDK2/LRRC4B/VSTM2L/CDH4/ITGB2/ARVCF/SCARF2/CELSR1/PLXNB2                                                                                              |
| NR4A2 R848   | GO:0006836 | neurotransmitter transport                                   | 24/892  | 244/21081 | 0.000115261 | 0.031062777 | SLC6A9/SLC1A7/GLUL/SNAP47/OTOF/RAB3GAP1/GAD1/SLC6A1/WNT7A/CACNA1D/GRM4/RIMS1/ICA1/NCS1/CHAT/RPH3A/NOS1/APBA2/CHRN4/SLC6A2/PIP5K1C/GRIK5/NAPA/CHRNA4                                                                                                               |
| NR4A2 R848   | GO:0007163 | establishment or maintenance of cell polarity                | 23/892  | 230/21081 | 0.000123938 | 0.03138716  | PRKCZ/SNX27/PARD3B/STK25/WNT7A/MAP4/EPH1/HTT/FAT1/KIF25/CDK5RAP2/CRB2/SHTN1/BRSK2/CDC42BPB/PKD1/CDH5/RND2/FSCN2/STK11/SIPA1L3/PARVB/WNT7B                                                                                                                         |
| NR4A2 R848   | GO:0010769 | regulation of cell morphogenesis involved in differentiation | 29/892  | 331/21081 | 0.000184786 | 0.040745315 | NGEF/KIF1A/STK25/WNT7A/PLXNB1/SEMA3F/PLXNA1/FSTL4/HECW1/CAMK2B/LIMK1/SEMA3E/DPYSL2/SEMA4D/OLFM1/ANAPC2/SHTN1/BRSK2/LRP1/LINGO1/RND2/BAIAP2/STK11/SEMA6B/ARHGAP33/MEGF8/CDH4/FBLN1/PLXNB2                                                                          |
| NR4A2 R848   | GO:0055075 | potassium ion homeostasis                                    | 7/892   | 31/21081  | 0.000255792 | 0.049380046 | SLC12A9/ATP12A/SLC12A4/ATP4A/ATP1A3/SLC12A5/UPK3A                                                                                                                                                                                                                 |
| NR4A2 R848   | GO:0070509 | calcium ion import                                           | 13/892  | 99/21081  | 0.000272724 | 0.049380046 | PSEN2/DYSF/CACNA1D/GCK/TRPV4/SLC24A1/CACNA1H/TRPV3/CACNA1G/CACNA1A/SLC8A2/SEMG1/CACNA1I                                                                                                                                                                           |
| NR4A2 R848   | GO:0048167 | regulation of synaptic plasticity                            | 21/892  | 213/21081 | 0.000291381 | 0.049380046 | PRKCZ/SNAP47/RAB3GAP1/SERPINE2/SORCS2/RIMS1/CAMK2B/ADGRB1/ANAPC2/RIN1/SHANK2/SLC24A1/RASGRF1/GRIN2A/JPH3/DLG4/BAIAP2/SLC8A2/SHANK1/SHISA7/S100B                                                                                                                   |
| NR4A2 R848   | GO:0030198 | extracellular matrix organization                            | 35/892  | 442/21081 | 0.000302319 | 0.049380046 | HSPG2/PXDN/COL6A3/FBLN2/COL7A1/ADAMT512/FGFR4/COL23A1/SMOC2/ELN/PLOD3/COL22A1/COL27A1/COL13A1/TLL2/COL17A1/MMP21/CAPN1/MMP8/PHLDB1/LRP1/MMP17/ITGA11/COL5A3/NCAN/ERCC2/KLK2/KLK4/KLK7/LAMA5/ITGB2/COL18A1/COL6A1/COL6A2/FBLN1                                     |
| NR4A3 Medium | GO:0050808 | synapse organization                                         | 21/295  | 479/21081 | 4.40688E-06 | 0.013150124 | C1QB/CNTN2/NGEF/KIF1A/WNT7A/LAMB2/MDGA1/THBS2/FZD9/ADGRB1/SNCG/SLIT1/SHANK2/ACTN1/NTRK3/ITGAM/DLG4/C3/LRRC4B/SHISA7/SEZ6L                                                                                                                                         |
| NR4A3 R848   | GO:0007215 | glutamate receptor signaling pathway                         | 12/514  | 104/21081 | 8.77741E-06 | 0.036399903 | PINK1/GRM4/GRM8/GRID1/DAGLA/SHANK2/RASGRF1/GRIN2A/DLG4/UNC13A/CACNG7/SHISA7                                                                                                                                                                                       |
| NR4A3 R848   | GO:0030198 | extracellular matrix organization                            | 26/514  | 442/21081 | 3.62071E-05 | 0.047141539 | HSPG2/OPTC/CAPN2/PXDN/FBLN2/DSP/CLKB1/FGFR4/SMOC2/ELN/COL22A1/COL27A1/COL5A1/COL17A1/PHLDB1/MMP17/PECAM1/COL5A3/COMP/NCAN/CAPNS1/KLK7/ITGB2/COL18A1/COL6A1/COL6A2                                                                                                 |
| NR4A3 R848   | GO:0043062 | extracellular structure organization                         | 26/514  | 443/21081 | 3.76066E-05 | 0.047141539 | HSPG2/OPTC/CAPN2/PXDN/FBLN2/DSP/CLKB1/FGFR4/SMOC2/ELN/COL22A1/COL27A1/COL5A1/COL17A1/PHLDB1/MMP17/PECAM1/COL5A3/COMP/NCAN/CAPNS1/KLK7/ITGB2/COL18A1/COL6A1/COL6A2                                                                                                 |
| NR4A3 R848   | GO:0048168 | regulation of neuronal synaptic plasticity                   | 8/514   | 56/21081  | 6.00751E-05 | 0.047141539 | CAMK2A/CAMK2B/RASGRF1/DLG4/UNC13A/PPIA3/SHISA7/SYNGR1                                                                                                                                                                                                             |

|                   |            |                                       |        |           |             |             |                                                                                                                |
|-------------------|------------|---------------------------------------|--------|-----------|-------------|-------------|----------------------------------------------------------------------------------------------------------------|
| <b>NR4A3 R848</b> | GO:0048167 | regulation of synaptic plasticity     | 16/514 | 213/21081 | 7.24467E-05 | 0.047141539 | PRKCZ/FAM107A/SORCS2/CAMK2A/CAMK2B/ADGRB1/SHANK2/RASGRF1/GRIN2A/DLG4/BAIAP2/UNC13A/PPFIA3/SHISA7/YTHDF1/SYNGR1 |
| <b>NR4A3 R848</b> | GO:0003382 | epithelial cell morphogenesis         | 7/514  | 43/21081  | 7.40484E-05 | 0.047141539 | FLNB/COL22A1/RILPL1/CCDC88C/PECAM1/SIPA1L3/COL18A1                                                             |
| <b>NR4A3 R848</b> | GO:0001505 | regulation of neurotransmitter levels | 18/514 | 261/21081 | 7.95734E-05 | 0.047141539 | SLC1A7/OTOF/GAD1/PER2/CACNA1D/CPLX1/CAMK2A/GRM4/SLC1A2/DAGLA/PDE1B/RPH3A/NOS1/PI5K1C/STXBP2/UNC13A/PPFIA3/SYT3 |
