# Supplementary material for: Nuclear Receptor Subfamily 4A Signaling as a Key Disease Pathway of CD1c+ Dendritic Cell Dysregulation in Systemic Sclerosis
Source: PubMed Central journal article supplement — Arthritis Rheumatol. 2022 Dec 8;75(2):279–92. doi: 10.1002/art.42319 (PMC10108054; doi:10.1002/art.42319), 2022-12-08
Supplement: ART-75-279-s007.pdf [file ART-75-279-s007.pdf]

| Condition    | peakChr | peakStart | peakEnd   | annotation        | geneChr | geneStart | geneEnd   | distanceToTSS | geneID          | geneSymbol   |
|--------------|---------|-----------|-----------|-------------------|---------|-----------|-----------|---------------|-----------------|--------------|
| NR4A1_Medium | chr1    | 631821    | 632221    | Promoter (<=1kb)  | 1       | 594198    | 631204    | -617          | ENSG00000230021 | LOC101928626 |
| NR4A1_Medium | chr1    | 1074381   | 1074781   | Promoter (<=1kb)  | 1       | 1070967   | 1074306   | -75           | ENSG00000237330 | RNF223       |
| NR4A1_Medium | chr1    | 1347776   | 1348176   | Promoter (<=1kb)  | 1       | 1341770   | 1348955   | 779           | ENSG00000107404 | DVL1         |
| NR4A1_Medium | chr1    | 1360776   | 1361176   | Promoter (<=1kb)  | 1       | 1352692   | 1361777   | 601           | ENSG00000162576 | MXRA8        |
| NR4A1_Medium | chr1    | 1479518   | 1479918   | Promoter (<=1kb)  | 1       | 1479049   | 1482662   | 469           | ENSG00000160072 | ATAD3B       |
| NR4A1_Medium | chr1    | 1596082   | 1596482   | Promoter (3-4kb)  | 1       | 1598012   | 1600135   | 3653          | ENSG00000228594 | FNDC10       |
| NR4A1_Medium | chr1    | 1803882   | 1804282   | Promoter (9-10kb) | 1       | 1787987   | 1794197   | -9685         | ENSG00000078369 | GNB1         |
| NR4A1_Medium | chr1    | 1842152   | 1842552   | Promoter (9-10kb) | 1       | 1804526   | 1832285   | -9867         | ENSG00000078369 | GNB1         |
| NR4A1_Medium | chr1    | 1893863   | 1894263   | Promoter (2-3kb)  | 1       | 1785285   | 1891117   | -2746         | ENSG00000078369 | GNB1         |
| NR4A1_Medium | chr1    | 2052261   | 2052661   | Promoter (1-2kb)  | 1       | 2050808   | 2059591   | 1453          | ENSG00000067606 | PRKCZ        |
| NR4A1_Medium | chr1    | 2155156   | 2155556   | Promoter (9-10kb) | 1       | 2145387   | 2185116   | 9769          | ENSG00000067606 | PRKCZ        |
| NR4A1_Medium | chr1    | 2430881   | 2431281   | Promoter (4-5kb)  | 1       | 2425980   | 2479804   | 4901          | ENSG00000149527 | PLCH2        |
| NR4A1_Medium | chr1    | 3026013   | 3026413   | Promoter (4-5kb)  | 1       | 3021467   | 3022903   | 4546          | ENSG00000169717 | ACTRT2       |
| NR4A1_Medium | chr1    | 3051397   | 3051797   | Promoter (9-10kb) | 1       | 3059617   | 3061751   | 9954          | ENSG00000177133 | PRDM16-DT    |
| NR4A1_Medium | chr1    | 3560949   | 3561349   | Promoter (<=1kb)  | 1       | 3560695   | 3560790   | -159          | ENSG00000207776 | MIR551A      |
| NR4A1_Medium | chr1    | 3605371   | 3605771   | Promoter (5-6kb)  | 1       | 3490562   | 3611277   | 5506          | ENSG00000162591 | MEGF6        |
| NR4A1_Medium | chr1    | 3676019   | 3676419   | Promoter (5-6kb)  | 1       | 3682366   | 3733079   | -5947         | ENSG00000078900 | TP73         |
| NR4A1_Medium | chr1    | 3782974   | 3783374   | Promoter (<=1kb)  | 1       | 3781290   | 3784047   | 673           | ENSG00000130764 | LRRC47       |
| NR4A1_Medium | chr1    | 6017214   | 6017614   | Promoter (8-9kb)  | 1       | 6026013   | 6099119   | -8399         | ENSG00000069424 | KCNAB2       |
| NR4A1_Medium | chr1    | 6107627   | 6108027   | Promoter (<=1kb)  | 1       | 6105081   | 6106772   | -855          | ENSG00000116254 | CHD5         |
| NR4A1_Medium | chr1    | 6150078   | 6150478   | Promoter (5-6kb)  | 1       | 6105081   | 6144104   | -5974         | ENSG00000116254 | CHD5         |
| NR4A1_Medium | chr1    | 6151397   | 6151797   | Promoter (7-8kb)  | 1       | 6105081   | 6144104   | -7293         | ENSG00000116254 | CHD5         |
| NR4A1_Medium | chr1    | 6175595   | 6175995   | Promoter (4-5kb)  | 1       | 6105091   | 6180023   | 4028          | ENSG00000116254 | CHD5         |
| NR4A1_Medium | chr1    | 8356626   | 8357026   | Promoter (5-6kb)  | 1       | 8355521   | 8362844   | 5818          | ENSG00000142599 | RERE         |
| NR4A1_Medium | chr1    | 9356773   | 9357173   | Promoter (1-2kb)  | 1       | 9355707   | 9367575   | 1066          | ENSG00000171621 | SPSB1        |
| NR4A1_Medium | chr1    | 9882343   | 9882743   | Promoter (4-5kb)  | 1       | 9850659   | 9878176   | -4167         | ENSG00000178585 | CTNBP1       |
| NR4A1_Medium | chr1    | 10661635  | 10662035  | Promoter (<=1kb)  | 1       | 10658007  | 10661398  | -237          | ENSG00000130940 | CASZ1        |
| NR4A1_Medium | chr1    | 10710784  | 10711184  | Promoter (5-6kb)  | 1       | 10704196  | 10705575  | -5209         | ENSG00000130940 | CASZ1        |
| NR4A1_Medium | chr1    | 12479135  | 12479535  | Promoter (<=1kb)  | 1       | 12478549  | 12506972  | 586           | ENSG00000048707 | VPS13D       |
| NR4A1_Medium | chr1    | 12583278  | 12583678  | Promoter (4-5kb)  | 1       | 12578957  | 12579023  | -4255         | ENSG00000276830 | MIR6730      |
| NR4A1_Medium | chr1    | 12644723  | 12645123  | Promoter (<=1kb)  | 1       | 12644547  | 12667086  | 176           | ENSG00000204518 | AADA4L4      |
| NR4A1_Medium | chr1    | 13513719  | 13514119  | Promoter (<=1kb)  | 1       | 13474973  | 13514003  | 0             | ENSG00000162494 | LRRC38       |
| NR4A1_Medium | chr1    | 16142584  | 16142984  | Promoter (3-4kb)  | 1       | 16134560  | 16146450  | 3466          | ENSG00000142627 | EPHA2        |
| NR4A1_Medium | chr1    | 16629307  | 16629707  | Promoter (<=1kb)  | 1       | 16618256  | 16628652  | -655          | ENSG00000215908 | CROCCP2      |
| NR4A1_Medium | chr1    | 16631527  | 16631927  | Promoter (<=1kb)  | 1       | 16618256  | 16631109  | -418          | ENSG00000215908 | CROCCP2      |
| NR4A1_Medium | chr1    | 16716348  | 16716748  | Promoter (3-4kb)  | 1       | 16692280  | 16720157  | 3409          | NA              | ESPNP        |
| NR4A1_Medium | chr1    | 18357144  | 18357544  | Promoter (3-4kb)  | 1       | 18361367  | 18378483  | -3823         | ENSG00000117154 | IGSF21       |
| NR4A1_Medium | chr1    | 18385014  | 18385414  | Promoter (9-10kb) | 1       | 18375957  | 18376920  | 9057          | ENSG00000117154 | IGSF21       |
| NR4A1_Medium | chr1    | 18858242  | 18858642  | Promoter (1-2kb)  | 1       | 18839599  | 18859682  | 1040          | ENSG00000179002 | TAS1R2       |
| NR4A1_Medium | chr1    | 20290995  | 20291395  | Promoter (<=1kb)  | 1       | 20290937  | 20339222  | 58            | ENSG00000158816 | VWA5B1       |
| NR4A1_Medium | chr1    | 20485905  | 20486305  | Promoter (<=1kb)  | 1       | 20482391  | 20486210  | 0             | ENSG00000162545 | CAMK2N1      |
| NR4A1_Medium | chr1    | 22563957  | 22564357  | Promoter (<=1kb)  | 1       | 22563564  | 22589621  | 393           | ENSG00000070886 | EPHA8        |
| NR4A1_Medium | chr1    | 22769914  | 22770314  | Promoter (4-5kb)  | 1       | 22775178  | 22913752  | -4864         | ENSG00000133216 | EPHB2        |
| NR4A1_Medium | chr1    | 22853066  | 22853466  | Promoter (9-10kb) | 1       | 22863159  | 22863226  | 9760          | ENSG00000264014 | MIR4253      |
| NR4A1_Medium | chr1    | 23625941  | 23626341  | Promoter (<=1kb)  | 1       | 23627334  | 23640568  | -993          | ENSG00000197880 | MDS2         |
| NR4A1_Medium | chr1    | 23681366  | 23681766  | Promoter (9-10kb) | 1       | 23691742  | 23696417  | -9976         | ENSG00000142676 | RPL11        |
| NR4A1_Medium | chr1    | 24067078  | 24067478  | Promoter (<=1kb)  | 1       | 24056035  | 24066579  | -499          | ENSG00000142661 | MYOM3        |
| NR4A1_Medium | chr1    | 26028416  | 26028816  | Promoter (3-4kb)  | 1       | 26032130  | 26035004  | -3314         | ENSG00000158008 | EXTL1        |
| NR4A1_Medium | chr1    | 36182598  | 36182998  | Promoter (3-4kb)  | 1       | 36179021  | 36180315  | 3577          | ENSG00000116871 | MAP7D1       |
| NR4A1_Medium | chr1    | 36431171  | 36431571  | Promoter (7-8kb)  | 1       | 36422786  | 36439000  | 7429          | ENSG00000116885 | OSCP1        |
| NR4A1_Medium | chr1    | 37559673  | 37560073  | Promoter (<=1kb)  | 1       | 37560538  | 37566856  | -465          | ENSG00000163879 | DNALI1       |
| NR4A1_Medium | chr1    | 43583070  | 43583470  | Promoter (<=1kb)  | 1       | 43582480  | 43591118  | 590           | ENSG00000142949 | PTPRF        |
| NR4A1_Medium | chr1    | 43906450  | 43906850  | Promoter (6-7kb)  | 1       | 43899588  | 43930176  | 6862          | ENSG00000126091 | ST3GAL3      |
| NR4A1_Medium | chr1    | 44838362  | 44838762  | Promoter (4-5kb)  | 1       | 44819844  | 44842944  | 4182          | ENSG00000117425 | PTCH2        |
| NR4A1_Medium | chr1    | 46425076  | 46425476  | Promoter (6-7kb)  | 1       | 46432129  | 46445321  | -6653         | NA              | FAAHP1       |
| NR4A1_Medium | chr1    | 46811347  | 46811747  | Promoter (<=1kb)  | 1       | 46811103  | 46817181  | 244           | ENSG00000142973 | CYP4B1       |
| NR4A1_Medium | chr1    | 47184334  | 47184734  | Promoter (<=1kb)  | 1       | 47183600  | 47185344  | 610           | ENSG00000162366 | PDZK1IP1     |
| NR4A1_Medium | chr1    | 48227033  | 48227433  | Promoter (1-2kb)  | 1       | 48229080  | 48231578  | -1647         | ENSG00000117834 | SLC5A9       |
| NR4A1_Medium | chr1    | 53097164  | 53097564  | Promoter (6-7kb)  | 1       | 53087184  | 53090982  | -6182         | ENSG00000162383 | SLC1A7       |
| NR4A1_Medium | chr1    | 54698894  | 54699294  | Promoter (<=1kb)  | 1       | 54699296  | 54742231  | -2            | ENSG00000271723 | MROH7-TTC4   |
| NR4A1_Medium | chr1    | 67212522  | 67212922  | Promoter (4-5kb)  | 1       | 67207638  | 67259675  | 4884          | ENSG00000162594 | IL23R        |
| NR4A1_Medium | chr1    | 109121873 | 109122273 | Promoter (7-8kb)  | 1       | 109114173 | 109191605 | 7700          | ENSG00000116299 | ELAPOR1      |
| NR4A1_Medium | chr1    | 109668035 | 109668435 | Promoter (<=1kb)  | 1       | 109668036 | 109675283 | 0             | ENSG00000213366 | GSTM2        |
| NR4A1_Medium | chr1    | 111856530 | 111856930 | Promoter (<=1kb)  | 1       | 111853762 | 111856905 | 0             | ENSG00000232558 | KCND3-IT1    |
| NR4A1_Medium | chr1    | 111982066 | 111982466 | Promoter (<=1kb)  | 1       | 111770662 | 111982796 | 330           | ENSG00000171385 | KCND3        |
| NR4A1_Medium | chr1    | 150981329 | 150981729 | Promoter (<=1kb)  | 1       | 150982249 | 150984371 | -520          | ENSG00000143412 | ANXA9        |
| NR4A1_Medium | chr1    | 151893216 | 151893616 | Promoter (1-2kb)  | 1       | 151874377 | 151891440 | -1776         | ENSG00000159445 | THEM4        |
| NR4A1_Medium | chr1    | 156595256 | 156595656 | Promoter (<=1kb)  | 1       | 156595720 | 156596502 | 846           | ENSG00000160818 | GPATCH4      |
| NR4A1_Medium | chr1    | 156665883 | 156666283 | Promoter (9-10kb) | 1       | 156656729 | 156659532 | 9154          | ENSG00000132692 | BCAN         |
| NR4A1_Medium | chr1    | 160151727 | 160152127 | Promoter (<=1kb)  | 1       | 160151586 | 160186977 | 141           | ENSG00000132681 | ATP1A4       |
| NR4A1_Medium | chr1    | 182236586 | 182236986 | Promoter (7-8kb)  | 1       | 182129310 | 182244399 | 7413          | NA              | LINC01344    |
| NR4A1_Medium | chr1    | 201211300 | 201211700 | Promoter (<=1kb)  | 1       | 201212642 | 201228952 | -942          | ENSG00000163395 | IGFN1        |
| NR4A1_Medium | chr1    | 202165148 | 202165548 | Promoter (2-3kb)  | 1       | 202168051 | 202189296 | -2503         | ENSG00000243323 | PTPRVP       |
| NR4A1_Medium | chr1    | 204081919 | 204082319 | Promoter (3-4kb)  | 1       | 204078129 | 204116627 | 3790          | ENSG00000143842 | SOX13        |
| NR4A1_Medium | chr1    | 204195159 | 204195559 | Promoter (<=1kb)  | 1       | 204190341 | 204196491 | 932           | ENSG00000170498 | KISS1        |
| NR4A1_Medium | chr1    | 204683165 | 204683565 | Promoter (1-2kb)  | 1       | 204617170 | 204685353 | 1788          | ENSG00000170382 | LRRN2        |
| NR4A1_Medium | chr1    | 205682967 | 205683367 | Promoter (2-3kb)  | 1       | 205657851 | 205680509 | -2458         | ENSG00000158715 | SLC45A3      |
| NR4A1_Medium | chr1    | 211254591 | 211254991 | Promoter (3-4kb)  | 1       | 211258377 | 211276335 | -3386         | ENSG00000117625 | RCOR3        |
| NR4A1_Medium | chr1    | 213904935 | 213905335 | Promoter (8-9kb)  | 1       | 213894663 | 213895970 | -8965         | ENSG00000230461 | PROX1-AS1    |
| NR4A1_Medium | chr1    | 227559961 | 227560361 | Promoter (3-4kb)  | 1       | 227563543 | 227677443 | -3182         | ENSG00000181450 | ZNF678       |
| NR4A1_Medium | chr1    | 227740730 | 227741167 | Promoter (4-5kb)  | 1       | 227736173 | 227748115 | 4557          | ENSG00000143740 | SNAP47       |
| NR4A1_Medium | chr1    | 228071255 | 228071655 | Promoter (4-5kb)  | 1       | 228073909 | 228076550 | 4895          | ENSG00000276255 | LINC02809    |
| NR4A1_Medium | chr1    | 228281774 | 228282174 | Promoter (4-5kb)  | 1       | 228277178 | 228284195 | 4596          | ENSG00000154358 | OBSCN        |
| NR4A1_Medium | chr1    | 228289215 | 228289615 | Promoter (<=1kb)  | 1       | 228288836 | 228303644 | 379           | ENSG00000154358 | OBSCN        |
| NR4A1_Medium | chr1    | 228622008 | 228622408 | Promoter (<=1kb)  | 1       | 228621447 | 228621565 | -443          | ENSG00000199352 | RNA5S1       |
| NR4A1_Medium | chr1    | 230335585 | 230335985 | Promoter (<=1kb)  | 1       | 230323542 | 230336295 | 310           | ENSG00000177614 | PGBD5        |
| NR4A1_Medium | chr1    | 235587436 | 235587836 | Promoter (1-2kb)  | 1       | 235551754 | 235588959 | 1123          | ENSG00000168243 | GNG4         |
| NR4A1_Medium | chr1    | 235594869 | 235595269 | Promoter (<=1kb)  | 1       | 235550832 | 235595479 | 210           | ENSG00000168243 | GNG4         |
| NR4A1_Medium | chr2    | 878185    | 878706    | Promoter (9-10kb) | 2       | 791614    | 868608    | -9577         | ENSG00000237667 | LINC01115    |
| NR4A1_Medium | chr2    | 1099476   | 1099876   | Promoter (2-3kb)  | 2       | 1102546   | 1209230   | -2670         | ENSG00000172554 | SNTG2        |
| NR4A1_Medium | chr2    | 1866519   | 1867122   | Promoter (4-5kb)  | 2       | 1789241   | 1861677   | -4842         | ENSG00000186487 | MYT1L        |
| NR4A1_Medium | chr2    | 3527717   | 3528117   | Promoter (5-6kb)  | 2       | 3531990   | 3533370   | 5253          | ENSG00000171865 | RNASEH1      |
| NR4A1_Medium | chr2    | 3725247   | 3725647   | Promoter (<=1kb)  | 2       | 3725946   | 3788532   | -299          | ENSG00000214866 | DCDC2C       |
| NR4A1_Medium | chr2    | 3971742   | 3972142   | Promoter (1-2kb)  | 2       | 3972846   | 3973678   | 1536          | ENSG00000237401 | LINC01304    |
| NR4A1_Medium | chr2    | 10190126  | 10190526  | Promoter (2-3kb)  | 2       | 10192614  | 10192671  | 2145          | ENSG00000265418 | MIR4261      |
| NR4A1_Medium | chr2    | 10312462  | 10312862  | Promoter (8-9kb)  | 2       | 10303700  |           |               |                 |              |

| Condition    | peakChr | peakStart | peakEnd   | annotation        | geneChr | geneStart | geneEnd   | distanceToTSS | geneID          | geneSymbol |
|--------------|---------|-----------|-----------|-------------------|---------|-----------|-----------|---------------|-----------------|------------|
| NR4A1_Medium | chr2    | 45188725  | 45189125  | Promoter (3-4kb)  | 2       | 45187170  | 45192285  | 3160          | ENSG00000205054 | LINC01121  |
| NR4A1_Medium | chr2    | 68113862  | 68114262  | Promoter (2-3kb)  | 2       | 68047277  | 68110948  | -2914         | ENSG00000197223 | C1D        |
| NR4A1_Medium | chr2    | 71571210  | 71571610  | Promoter (1-2kb)  | 2       | 71570138  | 71570916  | 1072          | ENSG00000135636 | DYSF       |
| NR4A1_Medium | chr2    | 71577168  | 71577568  | Promoter (<=1kb)  | 2       | 71576899  | 71686763  | 269           | ENSG00000135636 | DYSF       |
| NR4A1_Medium | chr2    | 71618312  | 71618712  | Promoter (7-8kb)  | 2       | 71610779  | 71644033  | 7533          | ENSG00000135636 | DYSF       |
| NR4A1_Medium | chr2    | 79096346  | 79096746  | Promoter (8-9kb)  | 2       | 79085540  | 79088019  | -8327         | ENSG00000172023 | REG1B      |
| NR4A1_Medium | chr2    | 79097951  | 79098351  | Promoter (9-10kb) | 2       | 79085540  | 79088019  | -9932         | ENSG00000172023 | REG1B      |
| NR4A1_Medium | chr2    | 85422886  | 85423286  | Promoter (<=1kb)  | 2       | 85422251  | 85425936  | 635           | ENSG00000152292 | SH2D6      |
| NR4A1_Medium | chr2    | 85666113  | 85666513  | Promoter (1-2kb)  | 2       | 85658255  | 85668172  | 1659          | ENSG00000168878 | SFTPB      |
| NR4A1_Medium | chr2    | 87825109  | 87825509  | Promoter (<=1kb)  | 2       | 87771406  | 87825767  | 258           | ENSG00000185304 | RGPD2      |
| NR4A1_Medium | chr2    | 96801295  | 96801695  | Promoter (3-4kb)  | 2       | 96798278  | 96798353  | 3017          | ENSG00000264157 | MIR3127    |
| NR4A1_Medium | chr2    | 100016231 | 100016631 | Promoter (8-9kb)  | 2       | 100006149 | 100007951 | -8280         | ENSG00000144218 | AFF3       |
| NR4A1_Medium | chr2    | 131032630 | 131033030 | Promoter (1-2kb)  | 2       | 131034928 | 131039670 | -1898         | ENSG00000136002 | ARHGEF4    |
| NR4A1_Medium | chr2    | 132254636 | 132255036 | Promoter (2-3kb)  | 2       | 132256966 | 132257080 | 2044          | ENSG00000221288 | MIR663B    |
| NR4A1_Medium | chr2    | 132257571 | 132257971 | Promoter (<=1kb)  | 2       | 132147591 | 132257969 | 0             | ENSG00000163046 | ANKRD30BL  |
| NR4A1_Medium | chr2    | 169361128 | 169361528 | Promoter (1-2kb)  | 2       | 169127109 | 169362534 | 1006          | ENSG00000081479 | LRP2       |
| NR4A1_Medium | chr2    | 174454569 | 174454969 | Promoter (9-10kb) | 2       | 174436306 | 174445422 | -9147         | ENSG00000163328 | GPR155     |
| NR4A1_Medium | chr2    | 216098890 | 216099290 | Promoter (8-9kb)  | 2       | 216107464 | 216206303 | -8174         | ENSG00000079246 | XRCC5      |
| NR4A1_Medium | chr2    | 217979451 | 217979851 | Promoter (<=1kb)  | 2       | 217893473 | 217978934 | -517          | ENSG00000079308 | TNS1       |
| NR4A1_Medium | chr2    | 219510035 | 219510435 | Promoter (3-4kb)  | 2       | 219514170 | 219534058 | -3735         | ENSG00000072182 | ASIC4      |
| NR4A1_Medium | chr2    | 221571082 | 221571482 | Promoter (<=1kb)  | 2       | 221425599 | 221572283 | 801           | ENSG00000116106 | EPHA4      |
| NR4A1_Medium | chr2    | 231583311 | 231583711 | Promoter (9-10kb) | 2       | 231592864 | 231594276 | -9153         | ENSG00000177673 | TEX44      |
| NR4A1_Medium | chr2    | 232643515 | 232643915 | Promoter (5-6kb)  | 2       | 232638141 | 232682774 | 5374          | ENSG00000115468 | EFHD1      |
| NR4A1_Medium | chr2    | 233014928 | 233015328 | Promoter (1-2kb)  | 2       | 232878701 | 233013256 | -1672         | ENSG00000066248 | NGEF       |
| NR4A1_Medium | chr2    | 233440716 | 233441116 | Promoter (2-3kb)  | 2       | 233438313 | 233472104 | 2403          | ENSG00000077044 | DGKD       |
| NR4A1_Medium | chr2    | 237516746 | 237517146 | Promoter (<=1kb)  | 2       | 237518029 | 237553991 | -883          | ENSG00000115648 | MLPH       |
| NR4A1_Medium | chr2    | 238117961 | 238118584 | Promoter (8-9kb)  | 2       | 238127390 | 238133287 | -8806         | ENSG00000144488 | ESPNL      |
| NR4A1_Medium | chr2    | 238191885 | 238192285 | Promoter (3-4kb)  | 2       | 238183716 | 238188594 | -3291         | ENSG00000132323 | ILKAP      |
| NR4A1_Medium | chr2    | 238555823 | 238556223 | Promoter (<=1kb)  | 2       | 238510690 | 238555054 | -769          | ENSG00000225493 | LINC01107  |
| NR4A1_Medium | chr2    | 239084429 | 239084829 | Promoter (1-2kb)  | 2       | 239085827 | 239085926 | 1097          | ENSG00000264810 | MIR4441    |
| NR4A1_Medium | chr2    | 239146441 | 239146841 | Promoter (5-6kb)  | 2       | 239134325 | 239140973 | -5468         | ENSG00000068024 | HDAC4      |
| NR4A1_Medium | chr2    | 240509924 | 240510324 | Promoter (2-3kb)  | 2       | 240500524 | 240507809 | -2115         | ENSG00000144504 | ANKMY1     |
| NR4A1_Medium | chr2    | 240527506 | 240527906 | Promoter (<=1kb)  | 2       | 240521939 | 240527881 | 0             | ENSG00000144504 | ANKMY1     |
| NR4A1_Medium | chr2    | 240674639 | 240675039 | Promoter (4-5kb)  | 2       | 240676419 | 240679368 | 4329          | ENSG00000185176 | AQP12B     |
| NR4A1_Medium | chr2    | 240951162 | 240951612 | Promoter (1-2kb)  | 2       | 240949655 | 240950929 | 1507          | ENSG00000226321 | CROCC2     |
| NR4A1_Medium | chr3    | 11005230  | 11005630  | Promoter (6-7kb)  | 3       | 11011659  | 11039192  | -6029         | ENSG00000157103 | SLC6A1     |
| NR4A1_Medium | chr3    | 12587750  | 12588150  | Promoter (1-2kb)  | 3       | 12584346  | 12585905  | -1845         | ENSG00000132155 | RAF1       |
| NR4A1_Medium | chr3    | 13617611  | 13618011  | Promoter (3-4kb)  | 3       | 13613898  | 13618993  | 3713          | ENSG00000163520 | FBLN2      |
| NR4A1_Medium | chr3    | 13868904  | 13869337  | Promoter (5-6kb)  | 3       | 13863668  | 13875113  | 5776          | ENSG00000154764 | WNT7A      |
| NR4A1_Medium | chr3    | 38020285  | 38020685  | Promoter (1-2kb)  | 3       | 38011293  | 38019034  | -1251         | ENSG00000187091 | PLCD1      |
| NR4A1_Medium | chr3    | 46570937  | 46571337  | Promoter (3-4kb)  | 3       | 46574534  | 46581860  | -3197         | ENSG00000241186 | TDFG1      |
| NR4A1_Medium | chr3    | 46702553  | 46702953  | Promoter (1-2kb)  | 3       | 46701392  | 46710886  | 1161          | ENSG00000181585 | TMIE       |
| NR4A1_Medium | chr3    | 48325394  | 48325794  | Promoter (2-3kb)  | 3       | 48306842  | 48328341  | 2547          | ENSG00000229453 | SPINK8     |
| NR4A1_Medium | chr3    | 48910456  | 48910856  | Promoter (7-8kb)  | 3       | 48918821  | 48961679  | -7965         | ENSG00000177479 | ARIH2      |
| NR4A1_Medium | chr3    | 49127537  | 49127937  | Promoter (<=1kb)  | 3       | 49125005  | 49128556  | 619           | ENSG00000172037 | LAMB2      |
| NR4A1_Medium | chr3    | 49193601  | 49194001  | Promoter (1-2kb)  | 3       | 49177634  | 49191858  | -1743         | ENSG00000236980 | C3orf84    |
| NR4A1_Medium | chr3    | 49830826  | 49831226  | Promoter (1-2kb)  | 3       | 49828621  | 49829774  | -1052         | ENSG00000183763 | TRAIIP     |
| NR4A1_Medium | chr3    | 51663478  | 51663878  | Promoter (<=1kb)  | 3       | 51662693  | 51684467  | 785           | ENSG00000164081 | TEX264     |
| NR4A1_Medium | chr3    | 53162907  | 53163307  | Promoter (1-2kb)  | 3       | 53161521  | 53181267  | 1386          | ENSG00000163932 | PRKCD      |
| NR4A1_Medium | chr3    | 56606082  | 56606482  | Promoter (9-10kb) | 3       | 56615869  | 56621818  | -9387         | ENSG00000180376 | CCDC66     |
| NR4A1_Medium | chr3    | 58210102  | 58210502  | Promoter (<=1kb)  | 3       | 58207760  | 58210920  | 418           | ENSG00000163687 | DNASE1L3   |
| NR4A1_Medium | chr3    | 68007528  | 68007928  | Promoter (1-2kb)  | 3       | 68006230  | 68545621  | 1298          | ENSG00000183662 | TAFA1      |
| NR4A1_Medium | chr3    | 75669098  | 75669499  | Promoter (2-3kb)  | 3       | 75672300  | 75742048  | -2801         | ENSG00000242516 | LINC00960  |
| NR4A1_Medium | chr3    | 93883400  | 93883800  | Promoter (2-3kb)  | 3       | 93877003  | 93886413  | 2613          | ENSG00000184500 | PROS1      |
| NR4A1_Medium | chr3    | 126020989 | 126021389 | Promoter (2-3kb)  | 3       | 126006363 | 126023764 | 2375          | ENSG00000114544 | SLC41A3    |
| NR4A1_Medium | chr3    | 126556611 | 126557011 | Promoter (1-2kb)  | 3       | 126549692 | 126558932 | 1921          | ENSG00000180697 | C3orf22    |
| NR4A1_Medium | chr3    | 126864478 | 126864878 | Promoter (9-10kb) | 3       | 126854864 | 126949879 | 9614          | ENSG00000159685 | CHCHD6     |
| NR4A1_Medium | chr3    | 128642872 | 128643272 | Promoter (<=1kb)  | 3       | 128637820 | 128642564 | -308          | ENSG00000163902 | RPN1       |
| NR4A1_Medium | chr3    | 129032247 | 129032647 | Promoter (1-2kb)  | 3       | 129030449 | 129040740 | 1798          | ENSG00000114654 | EFCC1      |
| NR4A1_Medium | chr3    | 129516298 | 129516698 | Promoter (3-4kb)  | 3       | 129512381 | 129514820 | 3917          | ENSG00000163913 | IFT122     |
| NR4A1_Medium | chr3    | 129516988 | 129517388 | Promoter (4-5kb)  | 3       | 129512381 | 129514820 | 4607          | ENSG00000163913 | IFT122     |
| NR4A1_Medium | chr3    | 131981361 | 131981761 | Promoter (4-5kb)  | 3       | 131985855 | 131985931 | 4170          | ENSG00000265859 | MIR5704    |
| NR4A1_Medium | chr3    | 134056681 | 134057081 | Promoter (<=1kb)  | 3       | 134055256 | 134057648 | 567           | ENSG00000243832 | LINC02000  |
| NR4A1_Medium | chr3    | 134058103 | 134058503 | Promoter (<=1kb)  | 3       | 134055256 | 134057648 | -455          | ENSG00000243832 | LINC02000  |
| NR4A1_Medium | chr3    | 138013897 | 138014297 | Promoter (3-4kb)  | 3       | 138010216 | 138032502 | 3681          | ENSG00000066405 | CLDN18     |
| NR4A1_Medium | chr3    | 141077657 | 141078057 | Promoter (<=1kb)  | 3       | 141077446 | 141147460 | 211           | ENSG00000175093 | SPSB4      |
| NR4A1_Medium | chr3    | 180903176 | 180903576 | Promoter (8-9kb)  | 3       | 180912482 | 180977155 | -8906         | ENSG00000114416 | FXR1       |
| NR4A1_Medium | chr3    | 184358535 | 184358935 | Promoter (<=1kb)  | 3       | 184346199 | 184358741 | 0             | ENSG00000114859 | CLCN2      |
| NR4A1_Medium | chr3    | 194621841 | 194622241 | Promoter (3-4kb)  | 3       | 194588469 | 194625951 | 3710          | ENSG00000145014 | TMEM44     |
| NR4A1_Medium | chr3    | 194705979 | 194706379 | Promoter (1-2kb)  | 3       | 194708093 | 194727666 | -1714         | ENSG00000237222 | LINC01968  |
| NR4A1_Medium | chr3    | 196995082 | 196995482 | Promoter (3-4kb)  | 3       | 196999460 | 197004736 | -3978         | ENSG00000228109 | MELTF-AS1  |
| NR4A1_Medium | chr4    | 822010    | 822410    | Promoter (3-4kb)  | 4       | 784958    | 826092    | 3682          | ENSG00000168993 | CPLX1      |
| NR4A1_Medium | chr4    | 833409    | 833809    | Promoter (7-8kb)  | 4       | 784957    | 826129    | -7280         | ENSG00000168993 | CPLX1      |
| NR4A1_Medium | chr4    | 868961    | 869361    | Promoter (<=1kb)  | 4       | 849278    | 869957    | 596           | ENSG00000178950 | GAK        |
| NR4A1_Medium | chr4    | 945091    | 945491    | Promoter (2-3kb)  | 4       | 948411    | 953354    | -2920         | ENSG00000127419 | TMEM175    |
| NR4A1_Medium | chr4    | 952418    | 952818    | Promoter (<=1kb)  | 4       | 952411    | 955491    | 7             | ENSG00000127419 | TMEM175    |
| NR4A1_Medium | chr4    | 1323933   | 1324333   | Promoter (4-5kb)  | 4       | 1329057   | 1340113   | -4724         | ENSG00000090316 | MAEA       |
| NR4A1_Medium | chr4    | 1745034   | 1745434   | Promoter (<=1kb)  | 4       | 1744439   | 1745076   | 595           | ENSG0000013810  | TACC3      |
| NR4A1_Medium | chr4    | 2447762   | 2448162   | Promoter (4-5kb)  | 4       | 2443215   | 2450356   | 4547          | ENSG00000206113 | CFAP99     |
| NR4A1_Medium | chr4    | 3674635   | 3675035   | Promoter (2-3kb)  | 4       | 3673593   | 3677855   | 2820          | ENSG00000250632 | LINC02171  |
| NR4A1_Medium | chr4    | 3775121   | 3775521   | Promoter (8-9kb)  | 4       | 3766385   | 3768526   | 8736          | ENSG00000184160 | ADRA2C     |
| NR4A1_Medium | chr4    | 6299594   | 6299994   | Promoter (4-5kb)  | 4       | 6294771   | 6300807   | 4823          | ENSG00000109501 | WFS1       |
| NR4A1_Medium | chr4    | 7307658   | 7308058   | Promoter (2-3kb)  | 4       | 7310450   | 7310524   | -2392         | ENSG00000264658 | MIR4798    |
| NR4A1_Medium | chr4    | 7400885   | 7401285   | Promoter (4-5kb)  | 4       | 7396278   | 7742836   | 4607          | ENSG00000184985 | SORCS2     |
| NR4A1_Medium | chr4    | 7724447   | 7724847   | Promoter (9-10kb) | 4       | 7734280   | 7740720   | -9433         | ENSG00000184985 | SORCS2     |
| NR4A1_Medium | chr4    | 7974289   | 7974689   | Promoter (8-9kb)  | 4       | 7965329   | 7983432   | 8743          | ENSG00000163995 | ABLIM2     |
| NR4A1_Medium | chr4    | 8012459   | 8012859   | Promoter (1-2kb)  | 4       | 8007385   | 8010728   | -1731         | ENSG00000163995 | ABLIM2     |
| NR4A1_Medium | chr4    | 8022825   | 8023225   | Promoter (1-2kb)  | 4       | 7965310   | 8020825   | -2000         | ENSG00000163995 | ABLIM2     |
| NR4A1_Medium | chr4    | 8026602   | 8027002   | Promoter (5-6kb)  | 4       | 7965310   | 8020825   | -5777         | ENSG00000163995 | ABLIM2     |
| NR4A1_Medium | chr4    | 8040418   | 8040818   | Promoter (<=1kb)  | 4       | 8020213   | 8041436   | 618           | ENSG00000163995 | ABLIM2     |
| NR4A1_Medium | chr4    | 8069566   | 8069966   | Promoter (1-2kb)  | 4       | 8008063   | 8071827   | 1861          | ENSG00000163995 | ABLIM2     |
| NR4A1_Medium | chr4    | 8229406   | 8229806   | Promoter (<=1kb)  | 4       | 8229224   | 8232894   | 182           | ENSG00000125089 | SH3TC1     |
| NR4A1_Medium | chr4    | 8263534   | 8263934   | Promoter (5-6kb)  | 4       | 8269754   | 8307098   | -5820         | ENSG00000170801 | HTRA3      |
| NR4A1_Medium | chr4    | 8605146   | 8605546   | Promoter (3-4kb)  | 4       | 8601970   | 8619761   | 3176          | ENSG00000109625 | CPZ        |
| NR4A1_Medium | chr4    | 17781144  | 17781544  | Promoter (<=1kb)  | 4       | 17629306  | 17781621  | 77            | ENSG00000047662 | FAM1       |



| Condition    | peakChr | peakStart | peakEnd   | annotation        | geneChr | geneStart | geneEnd   | distanceToTSS | geneID          | geneSymbol            |
|--------------|---------|-----------|-----------|-------------------|---------|-----------|-----------|---------------|-----------------|-----------------------|
| NR4A1_Medium | chr4    | 165031966 | 165032366 | Promoter (<=1kb)  | 4       | 165031999 | 165041749 | 0             | ENSG00000176979 | TRIM60                |
| NR4A1_Medium | chr4    | 170091333 | 170091733 | Promoter (<=1kb)  | 4       | 170073250 | 170091699 | 0             | ENSG00000109576 | AADAT                 |
| NR4A1_Medium | chr4    | 183806917 | 183807317 | Promoter (9-10kb) | 4       | 183797692 | 184017378 | 9225          | ENSG00000173320 | STOX2                 |
| NR4A1_Medium | chr4    | 185541780 | 185542180 | Promoter (6-7kb)  | 4       | 185501751 | 185535612 | -6168         | ENSG00000154553 | PDLIM3                |
| NR4A1_Medium | chr4    | 190067621 | 190068021 | Promoter (2-3kb)  | 4       | 190065233 | 190065914 | 2388          | ENSG00000281591 | DBET                  |
| NR4A1_Medium | chr5    | 856591    | 856991    | Promoter (5-6kb)  | 5       | 795607    | 850986    | -5605         | ENSG00000188818 | ZDHHC11               |
| NR4A1_Medium | chr5    | 1199411   | 1199811   | Promoter (1-2kb)  | 5       | 1201595   | 1223270   | -1784         | ENSG00000174358 | SLC6A19               |
| NR4A1_Medium | chr5    | 1211552   | 1211952   | Promoter (9-10kb) | 5       | 1201595   | 1225111   | 9957          | ENSG00000174358 | SLC6A19               |
| NR4A1_Medium | chr5    | 1258964   | 1259364   | Promoter (5-6kb)  | 5       | 1254617   | 1264534   | 5170          | ENSG00000164362 | TERT                  |
| NR4A1_Medium | chr5    | 1282614   | 1283014   | Promoter (<=1kb)  | 5       | 1253147   | 1283010   | 0             | ENSG00000164362 | TERT                  |
| NR4A1_Medium | chr5    | 1847776   | 1848373   | Promoter (8-9kb)  | 5       | 1855970   | 1856568   | 8195          | ENSG00000250417 | LINC02116             |
| NR4A1_Medium | chr5    | 3446046   | 3446457   | Promoter (6-7kb)  | 5       | 3452816   | 3461660   | -6359         | ENSG00000249830 | LINC02162             |
| NR4A1_Medium | chr5    | 3586361   | 3586761   | Promoter (9-10kb) | 5       | 3595832   | 3601403   | -9071         | ENSG00000170549 | IRX1                  |
| NR4A1_Medium | chr5    | 16930989  | 16931389  | Promoter (4-5kb)  | 5       | 16780734  | 16935938  | 4549          | ENSG00000145555 | MYO10                 |
| NR4A1_Medium | chr5    | 31690419  | 31690819  | Promoter (2-3kb)  | 5       | 31692887  | 31843975  | -2068         | ENSG00000133401 | PDZD2                 |
| NR4A1_Medium | chr5    | 34179317  | 34179802  | Promoter (9-10kb) | 5       | 34164698  | 34189514  | 9712          | ENSG00000082196 | C1QTNF3               |
| NR4A1_Medium | chr5    | 34191405  | 34191805  | Promoter (1-2kb)  | 5       | 34190056  | 34193653  | 1349          | NA              | LOC646652             |
| NR4A1_Medium | chr5    | 58481575  | 58481975  | Promoter (9-10kb) | 5       | 58491435  | 58494742  | -9460         | ENSG00000175857 | GAPT                  |
| NR4A1_Medium | chr5    | 61731289  | 61731689  | Promoter (3-4kb)  | 5       | 61732774  | 61735668  | 3979          | ENSG00000251575 | C5orf64-AS1           |
| NR4A1_Medium | chr5    | 136193543 | 136193943 | Promoter (<=1kb)  | 5       | 136191468 | 136193162 | -381          | ENSG00000271824 | SMIM32                |
| NR4A1_Medium | chr5    | 147873200 | 147873600 | Promoter (1-2kb)  | 5       | 147872018 | 147882191 | 1182          | ENSG00000164265 | SCGB3A2               |
| NR4A1_Medium | chr5    | 150241294 | 150241694 | Promoter (3-4kb)  | 5       | 150221774 | 150245328 | 3634          | ENSG00000070808 | CAMK2A                |
| NR4A1_Medium | chr5    | 150263363 | 150263763 | Promoter (1-2kb)  | 5       | 150253501 | 150265397 | 1634          | ENSG00000070808 | CAMK2A                |
| NR4A1_Medium | chr5    | 154598015 | 154598415 | Promoter (1-2kb)  | 5       | 154596012 | 154596072 | -1943         | ENSG00000264760 | MIR3141               |
| NR4A1_Medium | chr5    | 168461846 | 168462246 | Promoter (2-3kb)  | 5       | 168464928 | 168472303 | -2682         | ENSG00000113645 | WWC1                  |
| NR4A1_Medium | chr5    | 172082090 | 172082490 | Promoter (<=1kb)  | 5       | 172064365 | 172082405 | 0             | ENSG00000072786 | STK10                 |
| NR4A1_Medium | chr5    | 172450994 | 172451394 | Promoter (2-3kb)  | 5       | 172325000 | 172454308 | 2914          | ENSG00000174705 | SH3PXD2B              |
| NR4A1_Medium | chr5    | 176579995 | 176580395 | Promoter (6-7kb)  | 5       | 176586651 | 176590661 | -6256         | ENSG00000074276 | CDHR2                 |
| NR4A1_Medium | chr5    | 176814730 | 176815130 | Promoter (4-5kb)  | 5       | 176810559 | 176880898 | 4171          | ENSG00000113763 | UNC5A                 |
| NR4A1_Medium | chr5    | 178269515 | 178269915 | Promoter (3-4kb)  | 5       | 178263208 | 178265834 | -3681         | ENSG00000050767 | COL23A1               |
| NR4A1_Medium | chr5    | 180213693 | 180214093 | Promoter (4-5kb)  | 5       | 180100795 | 180209211 | -4482         | ENSG00000146090 | RASGEF1C              |
| NR4A1_Medium | chr5    | 180635591 | 180635991 | Promoter (6-7kb)  | 5       | 180607965 | 180629338 | -6253         | ENSG00000037280 | FLT4                  |
| NR4A1_Medium | chr5    | 181126600 | 181127000 | Promoter (1-2kb)  | 5       | 181124357 | 181125304 | -1296         | ENSG00000185372 | OR2V1                 |
| NR4A1_Medium | chr6    | 13413638  | 13414038  | Promoter (5-6kb)  | 6       | 13357830  | 13408137  | -5501         | ENSG00000145990 | GFOD1                 |
| NR4A1_Medium | chr6    | 19807433  | 19807833  | Promoter (2-3kb)  | 6       | 19707453  | 19804827  | -2606         | ENSG00000228412 | LNC-LBCS              |
| NR4A1_Medium | chr6    | 28365665  | 28366065  | Promoter (9-10kb) | 6       | 28324740  | 28356271  | -9394         | ENSG00000235109 | ZSCAN31               |
| NR4A1_Medium | chr6    | 33747480  | 33747880  | Promoter (<=1kb)  | 6       | 33722397  | 33746905  | -575          | ENSG00000161896 | IP6K3                 |
| NR4A1_Medium | chr6    | 34111004  | 34111711  | Promoter (<=1kb)  | 6       | 34022433  | 34111034  | 0             | ENSG00000124493 | GRM4                  |
| NR4A1_Medium | chr6    | 35797260  | 35797660  | Promoter (<=1kb)  | 6       | 35794982  | 35797323  | 0             | ENSG00000137392 | CLPS                  |
| NR4A1_Medium | chr6    | 40338025  | 40338425  | Promoter (1-2kb)  | 6       | 40337013  | 40379890  | 1012          | ENSG00000204091 | TDRG1                 |
| NR4A1_Medium | chr6    | 42132662  | 42133062  | Promoter (9-10kb) | 6       | 42126377  | 42142619  | 9557          | ENSG00000188112 | C6orf132              |
| NR4A1_Medium | chr6    | 42445568  | 42445968  | Promoter (5-6kb)  | 6       | 42228126  | 42451261  | 5293          | ENSG00000124496 | TRERF1                |
| NR4A1_Medium | chr6    | 43294272  | 43294672  | Promoter (1-2kb)  | 6       | 43295694  | 43299520  | -1022         | ENSG00000137204 | SLC22A7               |
| NR4A1_Medium | chr6    | 43501569  | 43501969  | Promoter (<=1kb)  | 6       | 43501526  | 43506553  | 43            | ENSG00000137221 | TJAP1                 |
| NR4A1_Medium | chr6    | 57948684  | 57949084  | Promoter (1-2kb)  | 6       | 57946083  | 57950399  | 1315          | ENSG00000215190 | LINC00680             |
| NR4A1_Medium | chr6    | 148946456 | 148946856 | Promoter (7-8kb)  | 6       | 148953907 | 149005588 | -7051         | ENSG00000111962 | UST                   |
| NR4A1_Medium | chr6    | 160218859 | 160219259 | Promoter (<=1kb)  | 6       | 160217014 | 160218284 | -575          | ENSG00000112499 | SLC22A2               |
| NR4A1_Medium | chr6    | 160355349 | 160355749 | Promoter (6-7kb)  | 6       | 160348378 | 160452577 | 6971          | ENSG00000146477 | SLC22A3               |
| NR4A1_Medium | chr6    | 160668698 | 160669098 | Promoter (4-5kb)  | 6       | 160531483 | 160664259 | -4439         | ENSG00000198670 | LPA                   |
| NR4A1_Medium | chr6    | 166415976 | 166416376 | Promoter (7-8kb)  | 6       | 166412296 | 166423984 | 7608          | ENSG00000071242 | RPS6KA2               |
| NR4A1_Medium | chr6    | 168311392 | 168311792 | Promoter (7-8kb)  | 6       | 168307223 | 168319710 | 7918          | ENSG00000164488 | DACT2                 |
| NR4A1_Medium | chr6    | 168431126 | 168431526 | Promoter (9-10kb) | 6       | 168441151 | 168667994 | -9625         | ENSG00000112562 | SMOC2                 |
| NR4A1_Medium | chr6    | 169174871 | 169175271 | Promoter (7-8kb)  | 6       | 169175277 | 169182841 | 7570          | ENSG00000261039 | LINC02544             |
| NR4A1_Medium | chr6    | 169218369 | 169218769 | Promoter (3-4kb)  | 6       | 169214447 | 169217790 | 3922          | NA              | LOC101929523          |
| NR4A1_Medium | chr6    | 169233633 | 169234033 | Promoter (3-4kb)  | 6       | 169234510 | 169237412 | 3379          | ENSG00000186340 | THBS2                 |
| NR4A1_Medium | chr6    | 169650175 | 169650575 | Promoter (<=1kb)  | 6       | 169457212 | 169649233 | -942          | ENSG00000184465 | WDR27                 |
| NR4A1_Medium | chr6    | 169659463 | 169659863 | Promoter (<=1kb)  | 6       | 169647648 | 169660692 | 829           | ENSG00000184465 | WDR27                 |
| NR4A1_Medium | chr6    | 169664921 | 169665321 | Promoter (1-2kb)  | 6       | 169657759 | 169663723 | -1198         | ENSG00000184465 | WDR27                 |
| NR4A1_Medium | chr7    | 566315    | 566715    | Promoter (4-5kb)  | 7       | 561958    | 565619    | 4357          | ENSG00000229380 | PRKAR1B-AS2           |
| NR4A1_Medium | chr7    | 1083437   | 1083837   | Promoter (1-2kb)  | 7       | 1082208   | 1092881   | 1229          | ENSG00000164850 | GPER1                 |
| NR4A1_Medium | chr7    | 1441697   | 1442097   | Promoter (<=1kb)  | 7       | 1434360   | 1441524   | -173          | ENSG00000164877 | MICALL2               |
| NR4A1_Medium | chr7    | 1690492   | 1690892   | Promoter (2-3kb)  | 7       | 1688119   | 1747954   | 2373          | ENSG00000225968 | ELFN1                 |
| NR4A1_Medium | chr7    | 1938965   | 1939365   | Promoter (1-2kb)  | 7       | 1898200   | 1940549   | 1184          | ENSG00000002822 | MAD1L1                |
| NR4A1_Medium | chr7    | 2102591   | 2102991   | Promoter (4-5kb)  | 7       | 2014506   | 2107708   | 4717          | ENSG00000002822 | MAD1L1                |
| NR4A1_Medium | chr7    | 2224047   | 2224447   | Promoter (<=1kb)  | 7       | 2213212   | 2223628   | -419          | ENSG00000002822 | MAD1L1                |
| NR4A1_Medium | chr7    | 2252714   | 2253114   | Promoter (3-4kb)  | 7       | 2249285   | 2251146   | 3429          | ENSG00000106268 | NUDT1                 |
| NR4A1_Medium | chr7    | 4124807   | 4125207   | Promoter (4-5kb)  | 7       | 4129685   | 4269000   | -4478         | ENSG00000146555 | SDK1                  |
| NR4A1_Medium | chr7    | 4179924   | 4180324   | Promoter (5-6kb)  | 7       | 4174222   | 4179258   | 5702          | ENSG00000146555 | SDK1                  |
| NR4A1_Medium | chr7    | 4807844   | 4808244   | Promoter (3-4kb)  | 7       | 4799105   | 4804068   | -3776         | ENSG00000157927 | RADIL                 |
| NR4A1_Medium | chr7    | 5755001   | 5755401   | Promoter (5-6kb)  | 7       | 5622695   | 5761138   | 5737          | ENSG00000111275 | RNF216                |
| NR4A1_Medium | chr7    | 6702266   | 6702666   | Promoter (1-2kb)  | 7       | 6688433   | 6700914   | -1352         | ENSG00000164631 | ZNF12                 |
| NR4A1_Medium | chr7    | 8152465   | 8152865   | Promoter (4-5kb)  | 7       | 8141765   | 8157764   | 4899          | ENSG00000003147 | ICA1                  |
| NR4A1_Medium | chr7    | 30910562  | 30910962  | Promoter (<=1kb)  | 7       | 30911694  | 30925517  | -732          | ENSG00000240583 | AQP1                  |
| NR4A1_Medium | chr7    | 31077491  | 31077891  | Promoter (9-10kb) | 7       | 31086971  | 31104899  | -9080         | ENSG00000078549 | ADCYAP1R1             |
| NR4A1_Medium | chr7    | 37847492  | 37847892  | Promoter (<=1kb)  | 7       | 37848597  | 37900397  | -705          | ENSG00000086288 | NME8                  |
| NR4A1_Medium | chr7    | 43247723  | 43248123  | Promoter (1-2kb)  | 7       | 43249137  | 43311993  | -1014         | ENSG00000002746 | HECW1                 |
| NR4A1_Medium | chr7    | 44147462  | 44147862  | Promoter (<=1kb)  | 7       | 44145644  | 44147125  | -337          | ENSG00000106633 | GCK                   |
| NR4A1_Medium | chr7    | 54545890  | 54546290  | Promoter (<=1kb)  | 7       | 54546161  | 54569489  | 0             | ENSG00000170419 | VSTM2A                |
| NR4A1_Medium | chr7    | 56030887  | 56031287  | Promoter (2-3kb)  | 7       | 56015031  | 56034156  | 2869          | ENSG00000146733 | PSPH                  |
| NR4A1_Medium | chr7    | 56091051  | 56091451  | Promoter (1-2kb)  | 7       | 56081717  | 56092932  | 1481          | ENSG00000164776 | PHKG1                 |
| NR4A1_Medium | chr7    | 56436076  | 56436476  | Promoter (3-4kb)  | 7       | 56421857  | 56432702  | -3374         | NA              | LOC650226             |
| NR4A1_Medium | chr7    | 66099089  | 66099726  | Promoter (9-10kb) | 7       | 66089239  | 66092954  | 9850          | ENSG00000126522 | ASL                   |
| NR4A1_Medium | chr7    | 66532209  | 66532609  | Promoter (9-10kb) | 7       | 66526088  | 66542549  | 9940          | ENSG00000229180 | GS1-124K5.11          |
| NR4A1_Medium | chr7    | 68016123  | 68016523  | Promoter (3-4kb)  | 7       | 68020235  | 68036917  | -3712         | ENSG00000225209 | LOC102723427          |
| NR4A1_Medium | chr7    | 73609059  | 73609459  | Promoter (1-2kb)  | 7       | 73599592  | 73607120  | -1939         | ENSG00000009950 | MLXIPL                |
| NR4A1_Medium | chr7    | 74049979  | 74050379  | Promoter (1-2kb)  | 7       | 74052294  | 74056365  | -1915         | ENSG00000049540 | ELN                   |
| NR4A1_Medium | chr7    | 74204245  | 74204645  | Promoter (4-5kb)  | 7       | 74199652  | 74219784  | 4593          | ENSG00000086730 | LAT2                  |
| NR4A1_Medium | chr7    | 76422667  | 76423067  | Promoter (1-2kb)  | 7       | 76424950  | 76442069  | -1883         | ENSG00000188372 | ZP3                   |
| NR4A1_Medium | chr7    | 99243835  | 99244235  | Promoter (5-6kb)  | 7       | 99238829  | 99306809  | 5006          | NA              | MYH16                 |
| NR4A1_Medium | chr7    | 100246777 | 100247177 | Promoter (<=1kb)  | 7       | 100222645 | 100246548 | -229          | ENSG00000239521 | CASTOR3               |
| NR4A1_Medium | chr7    | 100351712 | 100352112 | Promoter (<=1kb)  | 7       | 100352176 | 100367733 | -64           | ENSG00000272752 | STAG3L5P-PVRI2P-PILRB |
| NR4A1_Medium | chr7    | 101556592 | 101556992 | Promoter (3-4kb)  | 7       | 101553203 | 101557633 | 3389          | ENSG00000160963 | COL26A1               |
| NR4A1_Medium | chr7    | 101636179 | 101636579 | Promoter (6-7kb)  | 7       | 101613330 | 101629296 | -6883         | ENSG00000106436 | MYL10                 |
| NR4A1_Medium | chr7    | 127259298 | 127259698 | Promoter (6-7kb)  | 7       | 126438598 | 127253294 | -6004         | ENSG00000179603 | GRM8                  |
| NR4A1_Medium | chr7    | 128887650 | 128888050 | Promoter (6-7kb)  | 7       | 128862451 | 128880923 | -6727         | ENSG00000135253 |                       |

| Condition    | peakChr | peakStart | peakEnd   | annotation        | geneChr | geneStart | geneEnd   | distanceToTSS | geneID          | geneSymbol   |
|--------------|---------|-----------|-----------|-------------------|---------|-----------|-----------|---------------|-----------------|--------------|
| NR4A1_Medium | chr8    | 27461320  | 27461720  | Promoter (5-6kb)  | 8       | 27460576  | 27467517  | 5797          | ENSG00000120903 | CHRNA2       |
| NR4A1_Medium | chr8    | 28698561  | 28698961  | Promoter (1-2kb)  | 8       | 28698212  | 28700530  | 1569          | ENSG00000246339 | EXTL3-AS1    |
| NR4A1_Medium | chr8    | 29820323  | 29820723  | Promoter (7-8kb)  | 8       | 29821189  | 29828454  | 7731          | ENSG00000248964 | LOC101929470 |
| NR4A1_Medium | chr8    | 35236106  | 35236506  | Promoter (<=1kb)  | 8       | 35235775  | 35791208  | 331           | ENSG00000156687 | UNC5D        |
| NR4A1_Medium | chr8    | 37559199  | 37559599  | Promoter (5-6kb)  | 8       | 37450763  | 37554183  | -5016         | ENSG00000253414 | LINC01605    |
| NR4A1_Medium | chr8    | 37785347  | 37785747  | Promoter (1-2kb)  | 8       | 37784191  | 37829993  | 1156          | ENSG0000020181  | ADGRA2       |
| NR4A1_Medium | chr8    | 38431332  | 38431732  | Promoter (<=1kb)  | 8       | 38412848  | 38430820  | -512          | ENSG00000077782 | FGFR1        |
| NR4A1_Medium | chr8    | 42452004  | 42452404  | Promoter (7-8kb)  | 8       | 42439467  | 42460168  | 7764          | ENSG00000168575 | SLC20A2      |
| NR4A1_Medium | chr8    | 48726320  | 48726720  | Promoter (3-4kb)  | 8       | 48713634  | 48729789  | 3069          | ENSG00000034239 | EFCAB1       |
| NR4A1_Medium | chr8    | 56113271  | 56113671  | Promoter (<=1kb)  | 8       | 56112942  | 56113982  | 311           | ENSG00000172680 | MOS          |
| NR4A1_Medium | chr8    | 85714349  | 85714778  | Promoter (<=1kb)  | 8       | 85714922  | 85715833  | -144          | ENSG00000277422 | REXO1L2P     |
| NR4A1_Medium | chr8    | 98002785  | 98003185  | Promoter (4-5kb)  | 8       | 98007479  | 98035703  | -4294         | ENSG00000132561 | MATN2        |
| NR4A1_Medium | chr8    | 126714892 | 126715292 | Promoter (1-2kb)  | 8       | 126713334 | 127292876 | 1558          | ENSG00000253438 | PCAT1        |
| NR4A1_Medium | chr8    | 133194531 | 133194931 | Promoter (3-4kb)  | 8       | 133191137 | 133228064 | 3394          | ENSG00000104415 | CCN4         |
| NR4A1_Medium | chr8    | 138827706 | 138828106 | Promoter (<=1kb)  | 8       | 138825719 | 138828105 | 0             | ENSG00000169436 | COL22A1      |
| NR4A1_Medium | chr8    | 139872015 | 139872415 | Promoter (8-9kb)  | 8       | 139730996 | 139881295 | 8880          | ENSG00000167632 | TRAPPC9      |
| NR4A1_Medium | chr8    | 140272108 | 140272508 | Promoter (3-4kb)  | 8       | 140252571 | 140275753 | 3245          | ENSG00000167632 | TRAPPC9      |
| NR4A1_Medium | chr8    | 140551507 | 140551907 | Promoter (4-5kb)  | 8       | 140555408 | 140556238 | 4331          | ENSG00000123908 | AGO2         |
| NR4A1_Medium | chr8    | 142191135 | 142191535 | Promoter (6-7kb)  | 8       | 142198356 | 142209003 | -6821         | ENSG00000254008 | LINC00051    |
| NR4A1_Medium | chr8    | 142192615 | 142193015 | Promoter (5-6kb)  | 8       | 142198356 | 142209003 | -5341         | ENSG00000254008 | LINC00051    |
| NR4A1_Medium | chr8    | 142205095 | 142205495 | Promoter (6-7kb)  | 8       | 142198356 | 142209003 | 6739          | ENSG00000254008 | LINC00051    |
| NR4A1_Medium | chr8    | 142272258 | 142272658 | Promoter (7-8kb)  | 8       | 142271567 | 142279997 | 7339          | ENSG00000171045 | TSNARE1      |
| NR4A1_Medium | chr8    | 142282042 | 142282442 | Promoter (2-3kb)  | 8       | 142271567 | 142279997 | -2045         | ENSG00000171045 | TSNARE1      |
| NR4A1_Medium | chr8    | 142285111 | 142285511 | Promoter (5-6kb)  | 8       | 142271567 | 142279997 | -5114         | ENSG00000171045 | TSNARE1      |
| NR4A1_Medium | chr8    | 142318617 | 142319017 | Promoter (7-8kb)  | 8       | 142300116 | 142326225 | 7208          | ENSG00000171045 | TSNARE1      |
| NR4A1_Medium | chr8    | 142320358 | 142320758 | Promoter (5-6kb)  | 8       | 142300116 | 142326225 | 5467          | ENSG00000171045 | TSNARE1      |
| NR4A1_Medium | chr8    | 142469331 | 142469731 | Promoter (5-6kb)  | 8       | 142464016 | 142545006 | 5315          | ENSG00000181790 | ADGRB1       |
| NR4A1_Medium | chr8    | 142548194 | 142548594 | Promoter (4-5kb)  | 8       | 142543501 | 142544684 | 4693          | ENSG00000181790 | ADGRB1       |
| NR4A1_Medium | chr8    | 142612558 | 142612958 | Promoter (<=1kb)  | 8       | 142612065 | 142612702 | 0             | ENSG00000198576 | ARC          |
| NR4A1_Medium | chr8    | 142667245 | 142667645 | Promoter (2-3kb)  | 8       | 142657463 | 142669970 | 2325          | ENSG00000234616 | JRK          |
| NR4A1_Medium | chr8    | 142743546 | 142743946 | Promoter (1-2kb)  | 8       | 142740949 | 142742406 | -1140         | ENSG00000126233 | SLURP1       |
| NR4A1_Medium | chr8    | 142792325 | 142792725 | Promoter (5-6kb)  | 8       | 142784882 | 142786539 | -5786         | ENSG00000167656 | LY6D         |
| NR4A1_Medium | chr8    | 142990101 | 142990501 | Promoter (5-6kb)  | 8       | 142995850 | 142996482 | -5349         | NA              | CDC42P3      |
| NR4A1_Medium | chr8    | 143308255 | 143308655 | Promoter (1-2kb)  | 8       | 143309356 | 143310503 | 1848          | ENSG00000184428 | TOP1MT       |
| NR4A1_Medium | chr8    | 143410730 | 143411130 | Promoter (6-7kb)  | 8       | 143417679 | 143419150 | -6549         | ENSG00000254338 | MAFA-AS1     |
| NR4A1_Medium | chr8    | 143503570 | 143503970 | Promoter (3-4kb)  | 8       | 143484497 | 143507840 | 3870          | ENSG00000014164 | ZC3H3        |
| NR4A1_Medium | chr9    | 34480640  | 34481040  | Promoter (4-5kb)  | 9       | 34485046  | 34493328  | -4006         | ENSG00000122735 | DNAI1        |
| NR4A1_Medium | chr9    | 34606598  | 34606998  | Promoter (5-6kb)  | 9       | 34610495  | 34612097  | 5099          | ENSG00000164967 | RPP25L       |
| NR4A1_Medium | chr9    | 35709739  | 35710139  | Promoter (<=1kb)  | 9       | 35710676  | 35710741  | 602           | ENSG00000284195 | MIR6852      |
| NR4A1_Medium | chr9    | 36186114  | 36186514  | Promoter (4-5kb)  | 9       | 36190856  | 36212061  | -4342         | ENSG00000122705 | CLTA         |
| NR4A1_Medium | chr9    | 41229706  | 41230127  | Promoter (3-4kb)  | 9       | 41233755  | 41233835  | -3628         | ENSG00000276029 | MIR4477A     |
| NR4A1_Medium | chr9    | 61856665  | 61857082  | Promoter (2-3kb)  | 9       | 61854216  | 62076341  | 2449          | ENSG00000231527 | FAM27C       |
| NR4A1_Medium | chr9    | 62799451  | 62799851  | Promoter (1-2kb)  | 9       | 62801461  | 62810186  | -1610         | ENSG00000238113 | LINC01410    |
| NR4A1_Medium | chr9    | 63816940  | 63817340  | Promoter (2-3kb)  | 9       | 63819574  | 63819654  | -2234         | ENSG00000266017 | MIR4477B     |
| NR4A1_Medium | chr9    | 63817920  | 63818320  | Promoter (1-2kb)  | 9       | 63819574  | 63819654  | -1254         | ENSG00000266017 | MIR4477B     |
| NR4A1_Medium | chr9    | 63823329  | 63823987  | Promoter (3-4kb)  | 9       | 63819574  | 63819654  | 3755          | ENSG00000266017 | MIR4477B     |
| NR4A1_Medium | chr9    | 74826961  | 74827361  | Promoter (6-7kb)  | 9       | 74820232  | 74834057  | 6696          | ENSG00000119121 | TRPM6        |
| NR4A1_Medium | chr9    | 87869588  | 87869988  | Promoter (9-10kb) | 9       | 87858103  | 87859599  | -9989         | NA              | LOC392364    |
| NR4A1_Medium | chr9    | 89040012  | 89040412  | Promoter (1-2kb)  | 9       | 89037366  | 89042137  | 1725          | ENSG00000148082 | SHC3         |
| NR4A1_Medium | chr9    | 93818088  | 93818488  | Promoter (<=1kb)  | 9       | 93819357  | 93819421  | -869          | ENSG00000265347 | MIR4291      |
| NR4A1_Medium | chr9    | 98393005  | 98393405  | Promoter (4-5kb)  | 9       | 98362555  | 98388887  | -4118         | ENSG00000136928 | GABBR2       |
| NR4A1_Medium | chr9    | 113561309 | 113561709 | Promoter (3-4kb)  | 9       | 113564954 | 113597743 | -3245         | ENSG00000138835 | RGS3         |
| NR4A1_Medium | chr9    | 114165868 | 114166268 | Promoter (1-2kb)  | 9       | 114167715 | 114218579 | -1447         | ENSG00000196739 | COL27A1      |
| NR4A1_Medium | chr9    | 122531150 | 122531550 | Promoter (3-4kb)  | 9       | 122526358 | 122527296 | -3854         | ENSG00000171505 | OR1N1        |
| NR4A1_Medium | chr9    | 123372948 | 123373348 | Promoter (4-5kb)  | 9       | 123368779 | 123380324 | 4169          | ENSG00000148204 | CRB2         |
| NR4A1_Medium | chr9    | 125203916 | 125204316 | Promoter (3-4kb)  | 9       | 125200605 | 125220658 | 3311          | ENSG00000136933 | RABEPK       |
| NR4A1_Medium | chr9    | 128425157 | 128425557 | Promoter (<=1kb)  | 9       | 128424602 | 128435755 | 555           | ENSG00000167123 | CERCAM       |
| NR4A1_Medium | chr9    | 128859109 | 128859509 | Promoter (1-2kb)  | 9       | 128833123 | 128860532 | 1023          | ENSG00000171097 | KYAT1        |
| NR4A1_Medium | chr9    | 130183490 | 130183890 | Promoter (9-10kb) | 9       | 130193828 | 130217920 | -9938         | ENSG00000107130 | NCS1         |
| NR4A1_Medium | chr9    | 130454814 | 130455214 | Promoter (2-3kb)  | 9       | 130452223 | 130471514 | 2591          | ENSG00000130707 | ASS1         |
| NR4A1_Medium | chr9    | 131100156 | 131100556 | Promoter (2-3kb)  | 9       | 131098149 | 131120343 | 2007          | ENSG00000126878 | AIF1L        |
| NR4A1_Medium | chr9    | 131401672 | 131402072 | Promoter (7-8kb)  | 9       | 131394213 | 131447207 | 7459          | ENSG00000130723 | PRRC2B       |
| NR4A1_Medium | chr9    | 133933687 | 133934087 | Promoter (5-6kb)  | 9       | 133925851 | 133939301 | 5214          | ENSG00000160293 | VAV2         |
| NR4A1_Medium | chr9    | 134653760 | 134654160 | Promoter (<=1kb)  | 9       | 134653185 | 134709227 | 575           | ENSG00000130635 | COL5A1       |
| NR4A1_Medium | chr9    | 135069026 | 135069426 | Promoter (5-6kb)  | 9       | 135075422 | 135077391 | -5996         | ENSG00000130558 | OLFM1        |
| NR4A1_Medium | chr9    | 135084249 | 135084649 | Promoter (1-2kb)  | 9       | 135086554 | 135098352 | -1905         | ENSG00000130558 | OLFM1        |
| NR4A1_Medium | chr9    | 135091586 | 135091986 | Promoter (3-4kb)  | 9       | 135095060 | 135119654 | -3074         | ENSG00000130558 | OLFM1        |
| NR4A1_Medium | chr9    | 135726769 | 135727169 | Promoter (9-10kb) | 9       | 135736517 | 135793618 | -9348         | ENSG00000107147 | KCNT1        |
| NR4A1_Medium | chr9    | 135752619 | 135753019 | Promoter (<=1kb)  | 9       | 135753751 | 135786399 | -732          | ENSG00000107147 | KCNT1        |
| NR4A1_Medium | chr9    | 135755349 | 135755749 | Promoter (1-2kb)  | 9       | 135753751 | 135786399 | 1598          | ENSG00000107147 | KCNT1        |
| NR4A1_Medium | chr9    | 135774189 | 135774589 | Promoter (1-2kb)  | 9       | 135772858 | 135784858 | 1331          | ENSG00000107147 | KCNT1        |
| NR4A1_Medium | chr9    | 136087276 | 136087676 | Promoter (7-8kb)  | 9       | 136006537 | 136095289 | 7613          | ENSG00000148411 | NACC2        |
| NR4A1_Medium | chr9    | 136125188 | 136125588 | Promoter (6-7kb)  | 9       | 136114589 | 136118875 | -6313         | ENSG00000238227 | TMEM250      |
| NR4A1_Medium | chr9    | 136293885 | 136294285 | Promoter (9-10kb) | 9       | 136281385 | 136304070 | 9785          | ENSG00000260220 | CCDC187      |
| NR4A1_Medium | chr9    | 136747605 | 136748250 | Promoter (<=1kb)  | 9       | 136738167 | 136748453 | 203           | ENSG00000187922 | LCN10        |
| NR4A1_Medium | chr9    | 137900724 | 137901124 | Promoter (8-9kb)  | 9       | 137867925 | 137892570 | -8154         | ENSG00000203987 | LOC100133077 |
| NR4A1_Medium | chr9    | 138142804 | 138143236 | Promoter (6-7kb)  | 9       | 138150075 | 138174700 | -6839         | NA              | TUBBP5       |
| NR4A1_Medium | chr10   | 81088     | 81488     | Promoter (6-7kb)  | 10      | 46892     | 74163     | -6925         | ENSG00000261456 | TUBB8        |
| NR4A1_Medium | chr10   | 379685    | 380085    | Promoter (9-10kb) | 10      | 364962    | 390016    | 9931          | ENSG00000151240 | DIP2C        |
| NR4A1_Medium | chr10   | 1157213   | 1157613   | Promoter (2-3kb)  | 10      | 1159768   | 1165112   | -2155         | ENSG00000229205 | LINC00200    |
| NR4A1_Medium | chr10   | 1209262   | 1209662   | Promoter (8-9kb)  | 10      | 1183151   | 1200385   | -8877         | ENSG00000185736 | ADARB2       |
| NR4A1_Medium | chr10   | 1232414   | 1232814   | Promoter (7-8kb)  | 10      | 1215676   | 1240530   | 7716          | ENSG00000185736 | ADARB2       |
| NR4A1_Medium | chr10   | 11885348  | 11885762  | Promoter (8-9kb)  | 10      | 11849608  | 11894700  | 8938          | ENSG00000225778 | PROSER2-AS1  |
| NR4A1_Medium | chr10   | 13136191  | 13136591  | Promoter (4-5kb)  | 10      | 13131319  | 13136918  | 4872          | ENSG00000123240 | OPTN         |
| NR4A1_Medium | chr10   | 13975133  | 13975533  | Promoter (2-3kb)  | 10      | 13666224  | 13972369  | -2764         | ENSG00000151474 | FRMD4A       |
| NR4A1_Medium | chr10   | 14825882  | 14826282  | Promoter (1-2kb)  | 10      | 14819885  | 14828205  | 1923          | ENSG00000185267 | CDNF         |
| NR4A1_Medium | chr10   | 15025997  | 15026397  | Promoter (4-5kb)  | 10      | 15015370  | 15021863  | -4134         | NA              | DCLRE1CP1    |
| NR4A1_Medium | chr10   | 29472867  | 29473267  | Promoter (8-9kb)  | 10      | 29473534  | 29481655  | 8388          | ENSG00000197321 | SVIL         |
| NR4A1_Medium | chr10   | 42756094  | 42756494  | Promoter (1-2kb)  | 10      | 42751178  | 42754297  | -1797         | NA              | LOC283028    |
| NR4A1_Medium | chr10   | 43225207  | 43225607  | Promoter (4-5kb)  | 10      | 43194535  | 43229739  | 4132          | ENSG00000198915 | RASGEF1A     |
| NR4A1_Medium | chr10   | 43943265  | 43943665  | Promoter (<=1kb)  | 10      | 43943093  | 43944486  | 172           | NA              | LINC00841    |
| NR4A1_Medium | chr10   | 44909803  | 44910203  | Promoter (1-2kb)  | 10      | 44911316  | 44935194  | -1113         | ENSG00000187783 | TMEM72       |
| NR4A1_Medium | chr10   | 46267439  | 46267839  | Promoter (5-6kb)  | 10      | 46233885  | 46273557  | 5718          | NA              | ANTXRPL1     |
| NR4A1_Medium | chr10   | 46293137  | 46293537  | Promoter (<=1kb)  | 10      | 46292810  | 46294110  | 327           | ENSG00000274209 | ANTXRL       |
| NR4A1        |         |           |           |                   |         |           |           |               |                 |              |



| Condition    | peakChr | peakStart | peakEnd   | annotation        | geneChr | geneStart | geneEnd   | distanceToTSS | geneID          | geneSymbol   |
|--------------|---------|-----------|-----------|-------------------|---------|-----------|-----------|---------------|-----------------|--------------|
| NR4A1_Medium | chr10   | 104035976 | 104036376 | Promoter (1-2kb)  | 10      | 104031350 | 104034130 | -1846         | ENSG00000065618 | COL17A1      |
| NR4A1_Medium | chr10   | 119442457 | 119442857 | Promoter (9-10kb) | 10      | 119452448 | 119459742 | -9591         | ENSG00000198873 | GRK5         |
| NR4A1_Medium | chr10   | 119457540 | 119457940 | Promoter (5-6kb)  | 10      | 119452448 | 119459742 | 5092          | ENSG00000198873 | GRK5         |
| NR4A1_Medium | chr10   | 122551880 | 122552280 | Promoter (8-9kb)  | 10      | 122560665 | 122643736 | -8385         | ENSG00000187908 | DMBT1        |
| NR4A1_Medium | chr10   | 122725688 | 122726088 | Promoter (3-4kb)  | 10      | 122729429 | 122826448 | -3341         | ENSG00000176584 | DMBT1L1      |
| NR4A1_Medium | chr10   | 125775465 | 125775865 | Promoter (<=1kb)  | 10      | 125766453 | 125775821 | 0             | ENSG00000154485 | MMP21        |
| NR4A1_Medium | chr10   | 126158130 | 126158530 | Promoter (2-3kb)  | 10      | 126135368 | 126155305 | -2825         | ENSG00000148848 | ADAM12       |
| NR4A1_Medium | chr10   | 132364276 | 132364679 | Promoter (<=1kb)  | 10      | 132365471 | 132367001 | -792          | ENSG00000148814 | LRRC27       |
| NR4A1_Medium | chr10   | 132822724 | 132823124 | Promoter (9-10kb) | 10      | 132808443 | 132812804 | -9920         | ENSG00000171811 | CFAP46       |
| NR4A1_Medium | chr10   | 133069423 | 133069823 | Promoter (1-2kb)  | 10      | 133070929 | 133131675 | -1106         | ENSG00000197177 | ADGRA1       |
| NR4A1_Medium | chr10   | 133175554 | 133175954 | Promoter (8-9kb)  | 10      | 133167184 | 133207204 | 8370          | ENSG00000171798 | KNDC1        |
| NR4A1_Medium | chr10   | 133250230 | 133250630 | Promoter (2-3kb)  | 10      | 133246478 | 133247891 | -2339         | ENSG00000166917 | MIR202HG     |
| NR4A1_Medium | chr10   | 133421477 | 133421877 | Promoter (2-3kb)  | 10      | 133420666 | 133424572 | 2695          | ENSG00000203772 | SPRN         |
| NR4A1_Medium | chr11   | 413585    | 413985    | Promoter (<=1kb)  | 11      | 407315    | 414923    | 938           | ENSG00000185187 | SIGIRR       |
| NR4A1_Medium | chr11   | 1742736   | 1743136   | Promoter (5-6kb)  | 11      | 1735213   | 1749102   | 5966          | ENSG00000244242 | IFITM10      |
| NR4A1_Medium | chr11   | 2126012   | 2126412   | Promoter (7-8kb)  | 11      | 2134134   | 2134209   | 7797          | ENSG00000207805 | MIR483       |
| NR4A1_Medium | chr11   | 2131580   | 2131980   | Promoter (2-3kb)  | 11      | 2134134   | 2134209   | 2229          | ENSG00000207805 | MIR483       |
| NR4A1_Medium | chr11   | 2434305   | 2434705   | Promoter (9-10kb) | 11      | 2444684   | 2572906   | -9979         | ENSG00000053918 | KCNQ1        |
| NR4A1_Medium | chr11   | 3814604   | 3815004   | Promoter (1-2kb)  | 11      | 3816189   | 3824172   | -1185         | ENSG00000148985 | PGAP2        |
| NR4A1_Medium | chr11   | 5601719   | 5602119   | Promoter (1-2kb)  | 11      | 5603313   | 5612958   | -1194         | ENSG00000121236 | TRIM6        |
| NR4A1_Medium | chr11   | 13665094  | 13665494  | Promoter (3-4kb)  | 11      | 13668668  | 13732346  | -3174         | ENSG00000197601 | FAR1         |
| NR4A1_Medium | chr11   | 16887497  | 16887897  | Promoter (5-6kb)  | 11      | 16854889  | 16881619  | -5878         | ENSG00000166689 | PLEKHA7      |
| NR4A1_Medium | chr11   | 17780022  | 17780422  | Promoter (<=1kb)  | 11      | 17779172  | 17783055  | 850           | ENSG00000129159 | KCNC1        |
| NR4A1_Medium | chr11   | 45285944  | 45286344  | Promoter (<=1kb)  | 11      | 45240302  | 45286341  | 0             | ENSG00000019505 | SYT13        |
| NR4A1_Medium | chr11   | 61276888  | 61277288  | Promoter (3-4kb)  | 11      | 61258624  | 61273806  | -3082         | ENSG00000167992 | VWCE         |
| NR4A1_Medium | chr11   | 61391202  | 61391602  | Promoter (<=1kb)  | 11      | 61392360  | 61398863  | -758          | ENSG00000187049 | TMEM216      |
| NR4A1_Medium | chr11   | 61538247  | 61538647  | Promoter (3-4kb)  | 11      | 61539516  | 61542259  | 3612          | ENSG00000011347 | SYT7         |
| NR4A1_Medium | chr11   | 62745492  | 62745892  | Promoter (8-9kb)  | 11      | 62753318  | 62754159  | 8267          | ENSG00000185670 | ZBTB3        |
| NR4A1_Medium | chr11   | 63860390  | 63860790  | Promoter (7-8kb)  | 11      | 63868470  | 63895275  | -7680         | ENSG00000072518 | MARK2        |
| NR4A1_Medium | chr11   | 63980418  | 63980818  | Promoter (5-6kb)  | 11      | 63985853  | 63998411  | -5035         | ENSG00000167770 | OTUB1        |
| NR4A1_Medium | chr11   | 64351853  | 64352253  | Promoter (<=1kb)  | 11      | 64352886  | 64357528  | -633          | ENSG00000168071 | CCDC88B      |
| NR4A1_Medium | chr11   | 65834363  | 65834763  | Promoter (<=1kb)  | 11      | 65834004  | 65851348  | 359           | ENSG00000172803 | SNX32        |
| NR4A1_Medium | chr11   | 67669332  | 67669732  | Promoter (1-2kb)  | 11      | 67666157  | 67667970  | -1362         | ENSG00000132746 | ALDH3B2      |
| NR4A1_Medium | chr11   | 68438903  | 68439303  | Promoter (<=1kb)  | 11      | 68438593  | 68439953  | 310           | ENSG00000162337 | LRP5         |
| NR4A1_Medium | chr11   | 69016376  | 69016776  | Promoter (2-3kb)  | 11      | 69004395  | 69013382  | -2994         | ENSG00000172935 | MRGPRF       |
| NR4A1_Medium | chr11   | 69064776  | 69065176  | Promoter (7-8kb)  | 11      | 69072915  | 69162440  | -7739         | ENSG00000284713 | SMIM38       |
| NR4A1_Medium | chr11   | 69291732  | 69292132  | Promoter (2-3kb)  | 11      | 69294151  | 69341682  | -2019         | ENSG00000172927 | MYEOV        |
| NR4A1_Medium | chr11   | 69481741  | 69482141  | Promoter (<=1kb)  | 11      | 69481662  | 69493219  | 79            | NA              | LINC01488    |
| NR4A1_Medium | chr11   | 70194607  | 70195007  | Promoter (8-9kb)  | 11      | 70203163  | 70207390  | -8156         | ENSG00000168040 | FADD         |
| NR4A1_Medium | chr11   | 70702059  | 70702459  | Promoter (3-4kb)  | 11      | 70492432  | 70698769  | -3290         | ENSG00000162105 | SHANK2       |
| NR4A1_Medium | chr11   | 71414717  | 71415117  | Promoter (8-9kb)  | 11      | 71405746  | 71423354  | 8237          | ENSG00000172900 | ACTE1P       |
| NR4A1_Medium | chr11   | 71570537  | 71570937  | Promoter (4-5kb)  | 11      | 71565563  | 71566735  | 4974          | ENSG00000204572 | KRTAP5-10    |
| NR4A1_Medium | chr11   | 71577441  | 71577841  | Promoter (5-6kb)  | 11      | 71581855  | 71582875  | 5034          | ENSG00000204571 | KRTAP5-11    |
| NR4A1_Medium | chr11   | 75570465  | 75570865  | Promoter (2-3kb)  | 11      | 75567782  | 75572782  | 2683          | ENSG00000149257 | SERPINH1     |
| NR4A1_Medium | chr11   | 77192801  | 77193201  | Promoter (8-9kb)  | 11      | 77184686  | 77191187  | 8115          | ENSG00000137474 | MYO7A        |
| NR4A1_Medium | chr11   | 78052121  | 78052521  | Promoter (5-6kb)  | 11      | 78016593  | 78046191  | -5930         | ENSG00000151364 | KCTD14       |
| NR4A1_Medium | chr11   | 82992664  | 82993064  | Promoter (<=1kb)  | 11      | 82982089  | 82992383  | -281          | ENSG00000137502 | RAB30        |
| NR4A1_Medium | chr11   | 111358348 | 111358748 | Promoter (<=1kb)  | 11      | 111354537 | 111359406 | 658           | ENSG00000110777 | POU2AF1      |
| NR4A1_Medium | chr11   | 112254520 | 112254920 | Promoter (5-6kb)  | 11      | 112260265 | 112261396 | -5345         | ENSG00000268472 | LOC100132686 |
| NR4A1_Medium | chr11   | 113699114 | 113699514 | Promoter (4-5kb)  | 11      | 113690952 | 113694414 | -4700         | ENSG00000166682 | TMPRSS5      |
| NR4A1_Medium | chr11   | 117409271 | 117409671 | Promoter (<=1kb)  | 11      | 117409812 | 117411864 | -141          | ENSG00000110274 | CEP164       |
| NR4A1_Medium | chr11   | 117809762 | 117810162 | Promoter (7-8kb)  | 11      | 117776809 | 117817525 | 7363          | ENSG00000177103 | DSCAML1      |
| NR4A1_Medium | chr11   | 119312338 | 119312738 | Promoter (<=1kb)  | 11      | 119312950 | 119313012 | 274           | ENSG00000284148 | MIR6756      |
| NR4A1_Medium | chr11   | 123582910 | 123583460 | Promoter (7-8kb)  | 11      | 123591087 | 123627774 | -7627         | ENSG00000023171 | GRAMD1B      |
| NR4A1_Medium | chr11   | 125155348 | 125155748 | Promoter (8-9kb)  | 11      | 125158461 | 125164609 | 8861          | ENSG00000254880 | PKNOX2-AS1   |
| NR4A1_Medium | chr11   | 133531554 | 133531954 | Promoter (<=1kb)  | 11      | 132419860 | 133532402 | 448           | ENSG00000183715 | OPCML        |
| NR4A1_Medium | chr11   | 134740239 | 134740639 | Promoter (4-5kb)  | 11      | 134735596 | 134763810 | 4643          | ENSG00000251226 | LINC02714    |
| NR4A1_Medium | chr12   | 580882    | 581282    | Promoter (5-6kb)  | 12      | 585865    | 586486    | 5204          | NA              | LOC105369595 |
| NR4A1_Medium | chr12   | 4910628   | 4911028   | Promoter (<=1kb)  | 12      | 4910368   | 4931361   | 260           | ENSG00000111262 | KCNA1        |
| NR4A1_Medium | chr12   | 5616798   | 5617198   | Promoter (1-2kb)  | 12      | 5608729   | 5615295   | -1503         | ENSG00000047617 | ANO2         |
| NR4A1_Medium | chr12   | 6579357   | 6579757   | Promoter (<=1kb)  | 12      | 6570181   | 6579587   | 0             | ENSG00000111642 | CHD4         |
| NR4A1_Medium | chr12   | 29385200  | 29385600  | Promoter (3-4kb)  | 12      | 29389294  | 29487288  | -3694         | ENSG00000257599 | OVCH1-AS1    |
| NR4A1_Medium | chr12   | 49921582  | 49921982  | Promoter (1-2kb)  | 12      | 49923936  | 49930325  | -1954         | ENSG00000257771 | LINC02395    |
| NR4A1_Medium | chr12   | 52312933  | 52313333  | Promoter (8-9kb)  | 12      | 52314301  | 52321398  | 8065          | ENSG00000170523 | KRT83        |
| NR4A1_Medium | chr12   | 53474802  | 53475202  | Promoter (6-7kb)  | 12      | 53468468  | 53479624  | 6334          | ENSG00000197111 | PCBP2        |
| NR4A1_Medium | chr12   | 57191710  | 57192110  | Promoter (2-3kb)  | 12      | 57194504  | 57194576  | -2394         | ENSG00000221365 | MIR1228      |
| NR4A1_Medium | chr12   | 95895639  | 95896039  | Promoter (2-3kb)  | 12      | 95896518  | 95898743  | 2704          | ENSG00000165972 | CCDC38       |
| NR4A1_Medium | chr12   | 109284981 | 109285381 | Promoter (1-2kb)  | 12      | 109277979 | 109286723 | 1342          | ENSG00000139445 | FOXN4        |
| NR4A1_Medium | chr12   | 109768871 | 109769271 | Promoter (4-5kb)  | 12      | 109734323 | 109773485 | 4214          | ENSG00000255650 | FAM222A-AS1  |
| NR4A1_Medium | chr12   | 109808876 | 109809276 | Promoter (5-6kb)  | 12      | 109783621 | 109814796 | 5520          | ENSG00000111199 | TRPV4        |
| NR4A1_Medium | chr12   | 110907991 | 110908391 | Promoter (5-6kb)  | 12      | 110913133 | 110914290 | 5899          | ENSG00000111245 | MYL2         |
| NR4A1_Medium | chr12   | 113765253 | 113765653 | Promoter (1-2kb)  | 12      | 113737448 | 113767209 | 1556          | ENSG00000249550 | LINC01234    |
| NR4A1_Medium | chr12   | 120150506 | 120150906 | Promoter (4-5kb)  | 12      | 120155434 | 120155499 | 4593          | ENSG00000266704 | MIR4498      |
| NR4A1_Medium | chr12   | 120994856 | 120995256 | Promoter (1-2kb)  | 12      | 120996390 | 120997882 | -1134         | ENSG00000135100 | HNF1A        |
| NR4A1_Medium | chr12   | 124438715 | 124439115 | Promoter (8-9kb)  | 12      | 124429395 | 124430641 | -8074         | ENSG00000196498 | NCOR2        |
| NR4A1_Medium | chr12   | 124503288 | 124503688 | Promoter (8-9kb)  | 12      | 124324415 | 124495252 | -8036         | ENSG00000196498 | NCOR2        |
| NR4A1_Medium | chr12   | 125133878 | 125134278 | Promoter (1-2kb)  | 12      | 125135790 | 125136740 | -1512         | ENSG00000081760 | AACS         |
| NR4A1_Medium | chr12   | 125191020 | 125191420 | Promoter (4-5kb)  | 12      | 125186836 | 125349978 | 4184          | ENSG00000139364 | TMEM132B     |
| NR4A1_Medium | chr12   | 128119997 | 128120397 | Promoter (<=1kb)  | 12      | 128120534 | 128121546 | -137          | ENSG00000256659 | LINC02368    |
| NR4A1_Medium | chr12   | 131905818 | 131906218 | Promoter (<=1kb)  | 12      | 131906490 | 131909996 | -272          | ENSG00000177169 | ULK1         |
| NR4A1_Medium | chr12   | 131918667 | 131919067 | Promoter (<=1kb)  | 12      | 131919241 | 131921951 | -174          | ENSG00000177169 | ULK1         |
| NR4A1_Medium | chr12   | 132586875 | 132587275 | Promoter (4-5kb)  | 12      | 132581997 | 132582061 | 4878          | ENSG00000277052 | MIR6763      |
| NR4A1_Medium | chr12   | 132607668 | 132608068 | Promoter (1-2kb)  | 12      | 132604015 | 132606264 | -1404         | ENSG00000204583 | LRCOL1       |
| NR4A1_Medium | chr13   | 20151026  | 20151426  | Promoter (9-10kb) | 13      | 20138255  | 20161052  | 9626          | ENSG00000121743 | GJA3         |
| NR4A1_Medium | chr13   | 27459788  | 27460188  | Promoter (9-10kb) | 13      | 27437150  | 27450591  | -9197         | ENSG00000122033 | MTIF3        |
| NR4A1_Medium | chr13   | 27925393  | 27925793  | Promoter (5-6kb)  | 13      | 27920000  | 27926313  | 5393          | ENSG00000139515 | PDX1         |
| NR4A1_Medium | chr13   | 30154915  | 30155315  | Promoter (1-2kb)  | 13      | 30151886  | 30153710  | -1205         | NA              | LINC00384    |
| NR4A1_Medium | chr13   | 95293543  | 95293943  | Promoter (7-8kb)  | 13      | 95095797  | 95301302  | 7359          | ENSG00000125257 | ABCC4        |
| NR4A1_Medium | chr13   | 110873625 | 110874025 | Promoter (3-4kb)  | 13      | 110863987 | 110870251 | -3374         | ENSG00000255874 | PRECSIT      |
| NR4A1_Medium | chr13   | 111590173 | 111590573 | Promoter (5-6kb)  | 13      | 111596009 | 111642079 | -5436         | ENSG00000215881 | LINC02337    |
| NR4A1_Medium | chr13   | 112078569 | 112078969 | Promoter (1-2kb)  | 13      | 112080005 | 112099924 | -1036         | ENSG00000224243 | SOX1-OT      |
| NR4A1_Medium | chr13   | 112972309 | 112972709 | Promoter (3-4kb)  | 13      | 112969214 | 113099742 | 3095          | ENSG00000126217 | MCF2L        |
| NR4A1_Medium | chr13   | 113030886 | 113031286 | Promoter (6-7kb)  | 13      | 113024698 | 113052753 | 6188          | ENSG0000012     |              |

| Condition    | peakChr | peakStart | peakEnd   | annotation        | geneChr | geneStart | geneEnd   | distanceToTSS | geneID          | geneSymbol   |
|--------------|---------|-----------|-----------|-------------------|---------|-----------|-----------|---------------|-----------------|--------------|
| NR4A1_Medium | chr14   | 95465468  | 95465868  | Promoter (1-2kb)  | 14      | 95437802  | 95467856  | 1988          | ENSG00000176438 | SYNE3        |
| NR4A1_Medium | chr14   | 95698822  | 95699222  | Promoter (9-10kb) | 14      | 95689285  | 95691356  | 9537          | ENSG00000213231 | TCL1B        |
| NR4A1_Medium | chr14   | 99733420  | 99733820  | Promoter (3-4kb)  | 14      | 99737693  | 99909416  | -3873         | ENSG00000066629 | EML1         |
| NR4A1_Medium | chr14   | 100124835 | 100125235 | Promoter (3-4kb)  | 14      | 100128587 | 100144218 | -3352         | ENSG00000196405 | EVL          |
| NR4A1_Medium | chr14   | 100526620 | 100527020 | Promoter (<=1kb)  | 14      | 100525946 | 100529624 | 674           | ENSG00000176473 | WDR25        |
| NR4A1_Medium | chr14   | 100873206 | 100873606 | Promoter (<=1kb)  | 14      | 100874493 | 100874585 | -887          | ENSG00000199151 | MIR337       |
| NR4A1_Medium | chr14   | 101550274 | 101550726 | Promoter (4-5kb)  | 14      | 101552223 | 101555676 | 4950          | ENSG00000258498 | DIO3OS       |
| NR4A1_Medium | chr14   | 102244067 | 102244467 | Promoter (1-2kb)  | 14      | 102229120 | 102246159 | 1692          | ENSG00000080823 | MOK          |
| NR4A1_Medium | chr14   | 102498718 | 102499118 | Promoter (1-2kb)  | 14      | 102497539 | 102498412 | 1179          | ENSG00000196663 | TECPR2       |
| NR4A1_Medium | chr14   | 102920308 | 102920708 | Promoter (1-2kb)  | 14      | 102922656 | 102931192 | -1948         | ENSG00000166126 | AMN          |
| NR4A1_Medium | chr14   | 104232226 | 104232626 | Promoter (8-9kb)  | 14      | 104223655 | 104244622 | 8571          | ENSG00000258913 | LINC02691    |
| NR4A1_Medium | chr14   | 104859506 | 104859931 | Promoter (5-6kb)  | 14      | 104865268 | 104896747 | -5337         | ENSG00000099814 | CEP170B      |
| NR4A1_Medium | chr14   | 104861951 | 104862351 | Promoter (2-3kb)  | 14      | 104865268 | 104896747 | -2917         | ENSG00000099814 | CEP170B      |
| NR4A1_Medium | chr14   | 104948044 | 104948444 | Promoter (6-7kb)  | 14      | 104953537 | 104955402 | 6958          | ENSG00000185567 | AHNAK2       |
| NR4A1_Medium | chr14   | 104979253 | 104979653 | Promoter (<=1kb)  | 14      | 104937253 | 104978374 | -879          | ENSG00000185567 | AHNAK2       |
| NR4A1_Medium | chr14   | 105151238 | 105151638 | Promoter (<=1kb)  | 14      | 105150778 | 105150864 | -374          | ENSG00000273778 | MIR6765      |
| NR4A1_Medium | chr15   | 26885020  | 26885420  | Promoter (4-5kb)  | 15      | 26880543  | 26883413  | 4477          | ENSG00000186297 | GABRA5       |
| NR4A1_Medium | chr15   | 40655207  | 40655607  | Promoter (5-6kb)  | 15      | 40650127  | 40654977  | 5080          | ENSG00000137812 | KNL1         |
| NR4A1_Medium | chr15   | 42004126  | 42004526  | Promoter (6-7kb)  | 15      | 41981584  | 41997522  | -6604         | ENSG00000188089 | PLA2G4E      |
| NR4A1_Medium | chr15   | 44431628  | 44432028  | Promoter (3-4kb)  | 15      | 44427814  | 44484314  | 3814          | ENSG00000137770 | CTDSPL2      |
| NR4A1_Medium | chr15   | 45153190  | 45153590  | Promoter (<=1kb)  | 15      | 45153788  | 45155851  | -198          | ENSG00000137857 | DUOX1        |
| NR4A1_Medium | chr15   | 52119046  | 52119446  | Promoter (6-7kb)  | 15      | 52109263  | 52112775  | -6271         | ENSG00000137875 | BCL2L10      |
| NR4A1_Medium | chr15   | 57373881  | 57374281  | Promoter (1-2kb)  | 15      | 57375967  | 57438017  | -1686         | ENSG00000128849 | CGNL1        |
| NR4A1_Medium | chr15   | 73745653  | 73746053  | Promoter (5-6kb)  | 15      | 73739802  | 73751475  | 5422          | ENSG00000205363 | INSYN1       |
| NR4A1_Medium | chr15   | 73766769  | 73767169  | Promoter (<=1kb)  | 15      | 73768122  | 73770489  | -953          | NA              | INSYN1-AS1   |
| NR4A1_Medium | chr15   | 74809373  | 74809773  | Promoter (2-3kb)  | 15      | 74812716  | 74819899  | -2943         | ENSG00000140506 | LMAN1L       |
| NR4A1_Medium | chr15   | 75632600  | 75633000  | Promoter (6-7kb)  | 15      | 75609890  | 75626469  | -6131         | ENSG00000169371 | SNUPN        |
| NR4A1_Medium | chr15   | 76198783  | 76199183  | Promoter (7-8kb)  | 15      | 76191469  | 76204962  | 7314          | ENSG00000169758 | TMEM266      |
| NR4A1_Medium | chr15   | 77699460  | 77699860  | Promoter (2-3kb)  | 15      | 77615722  | 77696495  | -2965         | ENSG00000169783 | LINGO1       |
| NR4A1_Medium | chr15   | 79091945  | 79092345  | Promoter (1-2kb)  | 15      | 78959947  | 79090773  | -1172         | ENSG00000058335 | RASGRF1      |
| NR4A1_Medium | chr15   | 79452383  | 79452783  | Promoter (3-4kb)  | 15      | 79456096  | 79471144  | -3313         | ENSG00000169330 | MINAR1       |
| NR4A1_Medium | chr15   | 80952641  | 80953041  | Promoter (5-6kb)  | 15      | 80946944  | 80949162  | 5697          | ENSG00000103888 | CEMIP        |
| NR4A1_Medium | chr15   | 85066411  | 85066811  | Promoter (<=1kb)  | 15      | 85067028  | 85113400  | -217          | ENSG00000073417 | PDE8A        |
| NR4A1_Medium | chr15   | 88873449  | 88873849  | Promoter (<=1kb)  | 15      | 88873713  | 88874841  | 0             | ENSG00000157766 | ACAN         |
| NR4A1_Medium | chr15   | 88900945  | 88901345  | Promoter (<=1kb)  | 15      | 88899298  | 88901960  | 615           | ENSG00000140545 | MFGE8        |
| NR4A1_Medium | chr15   | 89470364  | 89470764  | Promoter (8-9kb)  | 15      | 89471445  | 89479430  | 8666          | ENSG00000140519 | RHCG         |
| NR4A1_Medium | chr15   | 101481200 | 101481600 | Promoter (7-8kb)  | 15      | 101384322 | 101489435 | 7835          | ENSG00000140479 | PCSK6        |
| NR4A1_Medium | chr15   | 101527745 | 101528145 | Promoter (2-3kb)  | 15      | 101304746 | 101525202 | -2543         | ENSG00000140479 | PCSK6        |
| NR4A1_Medium | chr16   | 773607    | 774007    | Promoter (3-4kb)  | 16      | 770183    | 770277    | 3424          | ENSG00000207579 | MIR662       |
| NR4A1_Medium | chr16   | 977752    | 978152    | Promoter (1-2kb)  | 16      | 976084    | 979648    | 1496          | ENSG00000103227 | LMF1         |
| NR4A1_Medium | chr16   | 1191640   | 1192040   | Promoter (2-3kb)  | 16      | 1195029   | 1198934   | -2989         | ENSG00000196557 | CACNA1H      |
| NR4A1_Medium | chr16   | 1498005   | 1498405   | Promoter (3-4kb)  | 16      | 1501707   | 1506665   | -3302         | ENSG00000100726 | TELO2        |
| NR4A1_Medium | chr16   | 1500078   | 1500478   | Promoter (1-2kb)  | 16      | 1501707   | 1506665   | -1229         | ENSG00000100726 | TELO2        |
| NR4A1_Medium | chr16   | 1949984   | 1950384   | Promoter (4-5kb)  | 16      | 1943974   | 1954689   | 4305          | ENSG00000140986 | RPL3L        |
| NR4A1_Medium | chr16   | 2448784   | 2449184   | Promoter (3-4kb)  | 16      | 2445392   | 2445457   | 3392          | ENSG00000283180 | MIR6767      |
| NR4A1_Medium | chr16   | 2898487   | 2898887   | Promoter (<=1kb)  | 16      | 2898755   | 2899365   | 0             | ENSG00000162076 | FLYWCH2      |
| NR4A1_Medium | chr16   | 3034599   | 3034999   | Promoter (<=1kb)  | 16      | 3027867   | 3035541   | 542           | ENSG00000162069 | BICDL2       |
| NR4A1_Medium | chr16   | 3551704   | 3552104   | Promoter (4-5kb)  | 16      | 3548135   | 3556994   | 4890          | ENSG00000167984 | NLRC3        |
| NR4A1_Medium | chr16   | 4554730   | 4555130   | Promoter (1-2kb)  | 16      | 4556490   | 4600714   | -1360         | ENSG00000205832 | C16orf96     |
| NR4A1_Medium | chr16   | 6773076   | 6773476   | Promoter (<=1kb)  | 16      | 6773809   | 7710844   | -333          | ENSG00000078328 | RBFOX1       |
| NR4A1_Medium | chr16   | 8591272   | 8591672   | Promoter (1-2kb)  | 16      | 8569500   | 8590193   | -1079         | ENSG00000232258 | TMEM114      |
| NR4A1_Medium | chr16   | 8761069   | 8761469   | Promoter (4-5kb)  | 16      | 8765785   | 8768846   | -4316         | ENSG00000183044 | ABAT         |
| NR4A1_Medium | chr16   | 10039937  | 10040337  | Promoter (8-9kb)  | 16      | 9938153   | 10031580  | -8357         | ENSG00000183454 | GRIN2A       |
| NR4A1_Medium | chr16   | 10859188  | 10859588  | Promoter (6-7kb)  | 16      | 10866222  | 10902104  | -6634         | ENSG00000179583 | CIITA        |
| NR4A1_Medium | chr16   | 11481580  | 11481980  | Promoter (9-10kb) | 16      | 11442191  | 11491755  | 9775          | ENSG00000188897 | LOC400499    |
| NR4A1_Medium | chr16   | 11485972  | 11486372  | Promoter (5-6kb)  | 16      | 11442191  | 11491755  | 5383          | ENSG00000188897 | LOC400499    |
| NR4A1_Medium | chr16   | 20073106  | 20073506  | Promoter (<=1kb)  | 16      | 20031659  | 20073767  | 261           | ENSG00000180269 | GPR139       |
| NR4A1_Medium | chr16   | 23508578  | 23508978  | Promoter (1-2kb)  | 16      | 23493431  | 23510389  | 1411          | ENSG00000103365 | GGA2         |
| NR4A1_Medium | chr16   | 27060731  | 27061131  | Promoter (5-6kb)  | 16      | 27066707  | 27069165  | -5576         | ENSG00000234186 | C16orf82     |
| NR4A1_Medium | chr16   | 28537596  | 28537996  | Promoter (<=1kb)  | 16      | 28537507  | 28538951  | 955           | ENSG00000176046 | NUPR1        |
| NR4A1_Medium | chr16   | 30357919  | 30358319  | Promoter (1-2kb)  | 16      | 30357102  | 30359674  | 1355          | ENSG00000169221 | TBC1D10B     |
| NR4A1_Medium | chr16   | 31328167  | 31328567  | Promoter (<=1kb)  | 16      | 31328037  | 31329905  | 130           | ENSG00000169896 | ITGAM        |
| NR4A1_Medium | chr16   | 33336599  | 33337011  | Promoter (6-7kb)  | 16      | 33206431  | 33330342  | -6257         | NA              | LOC105369266 |
| NR4A1_Medium | chr16   | 33337654  | 33338350  | Promoter (7-8kb)  | 16      | 33206431  | 33330342  | -7312         | NA              | LOC105369266 |
| NR4A1_Medium | chr16   | 46915737  | 46916137  | Promoter (<=1kb)  | 16      | 46915298  | 46929007  | 439           | ENSG00000166123 | GPT2         |
| NR4A1_Medium | chr16   | 49378011  | 49378411  | Promoter (4-5kb)  | 16      | 49373804  | 49399431  | 4207          | ENSG00000166152 | C16orf78     |
| NR4A1_Medium | chr16   | 53052970  | 53053370  | Promoter (<=1kb)  | 16      | 53035690  | 53052873  | -97           | ENSG00000277639 | LOC105371267 |
| NR4A1_Medium | chr16   | 57568171  | 57568571  | Promoter (6-7kb)  | 16      | 57574816  | 57591681  | -6245         | ENSG00000159618 | ADGRG5       |
| NR4A1_Medium | chr16   | 57637191  | 57637591  | Promoter (1-2kb)  | 16      | 57639295  | 57650306  | -1704         | ENSG00000205336 | ADGRG1       |
| NR4A1_Medium | chr16   | 57705738  | 57706218  | Promoter (<=1kb)  | 16      | 57704907  | 57707861  | 831           | ENSG00000159625 | DRC7         |
| NR4A1_Medium | chr16   | 57706373  | 57706773  | Promoter (1-2kb)  | 16      | 57704907  | 57707861  | 1466          | ENSG00000159625 | DRC7         |
| NR4A1_Medium | chr16   | 65067864  | 65068264  | Promoter (3-4kb)  | 16      | 65004766  | 65072213  | 3949          | ENSG00000140937 | CDH11        |
| NR4A1_Medium | chr16   | 66380495  | 66380895  | Promoter (1-2kb)  | 16      | 66379225  | 66392985  | 1270          | ENSG00000179776 | CDH5         |
| NR4A1_Medium | chr16   | 67828954  | 67829354  | Promoter (<=1kb)  | 16      | 67828186  | 67829170  | 0             | ENSG00000102901 | CENPT        |
| NR4A1_Medium | chr16   | 68866492  | 68866892  | Promoter (6-7kb)  | 16      | 68860165  | 68863160  | 6327          | ENSG00000103047 | TANGO6       |
| NR4A1_Medium | chr16   | 70482793  | 70483193  | Promoter (<=1kb)  | 16      | 70480867  | 70482794  | 0             | ENSG00000103051 | COG4         |
| NR4A1_Medium | chr16   | 70658573  | 70658973  | Promoter (4-5kb)  | 16      | 70654099  | 70660269  | 4474          | ENSG00000157368 | IL34         |
| NR4A1_Medium | chr16   | 80742530  | 80742930  | Promoter (7-8kb)  | 16      | 80684604  | 80735133  | -7397         | ENSG00000166446 | CDYL2        |
| NR4A1_Medium | chr16   | 81129167  | 81129567  | Promoter (6-7kb)  | 16      | 81100879  | 81136372  | 6805          | ENSG00000166473 | PKD1L2       |
| NR4A1_Medium | chr16   | 81168271  | 81168671  | Promoter (8-9kb)  | 16      | 81154130  | 81159988  | -8283         | ENSG00000166473 | PKD1L2       |
| NR4A1_Medium | chr16   | 83921089  | 83921489  | Promoter (9-10kb) | 16      | 83931311  | 83957650  | -9822         | ENSG00000140961 | OSGIN1       |
| NR4A1_Medium | chr16   | 83974842  | 83975410  | Promoter (3-4kb)  | 16      | 83978545  | 83998285  | -3135         | ENSG00000103154 | NECAB2       |
| NR4A1_Medium | chr16   | 86588059  | 86588459  | Promoter (9-10kb) | 16      | 86578506  | 86582160  | 9553          | ENSG00000176678 | FOXL1        |
| NR4A1_Medium | chr16   | 86712124  | 86712524  | Promoter (2-3kb)  | 16      | 86710122  | 86738461  | 2002          | ENSG00000261175 | LINC02188    |
| NR4A1_Medium | chr16   | 87597214  | 87597614  | Promoter (4-5kb)  | 16      | 87601835  | 87697927  | -4221         | ENSG00000154118 | JPH3         |
| NR4A1_Medium | chr16   | 87700596  | 87700996  | Promoter (7-8kb)  | 16      | 87703026  | 87708387  | 7391          | ENSG00000104731 | KLHDC4       |
| NR4A1_Medium | chr16   | 88014901  | 88015564  | Promoter (1-2kb)  | 16      | 88017190  | 88033219  | -1626         | ENSG00000172530 | BANP         |
| NR4A1_Medium | chr16   | 88029181  | 88029581  | Promoter (5-6kb)  | 16      | 88035052  | 88076835  | -5471         | ENSG00000172530 | BANP         |
| NR4A1_Medium | chr16   | 88979932  | 88980332  | Promoter (2-3kb)  | 16      | 88874858  | 88977207  | -2725         | ENSG00000129993 | CBFA2T3      |
| NR4A1_Medium | chr17   | 811363    | 811763    | Promoter (6-7kb)  | 17      | 800788    | 805248    | -6115         | ENSG00000167693 | NXN          |
| NR4A1_Medium | chr17   | 2352603   | 2353003   | Promoter (8-9kb)  | 17      | 2361777   | 2363045   | -8774         | ENSG00000141258 | SGSM2        |
| NR4A1_Medium | chr17   | 2586602   | 2587002   | Promoter (6-7kb)  | 17      | 2593210   | 2667045   | -6208         | ENSG00000007168 | PAFAH1B1     |
| NR4A1_Medium | chr17   | 2961569   | 2961969   | Promoter (3-4kb)  | 17      | 2962248   | 2965895   | 3926          | ENSG00000262884 | LOC101927911 |
| NR4A1_Medium | chr17   | 4526215   | 4526615   | Promoter (6-7kb)  | 17      | 4533032   | 4537798   | -6417         | ENSG00000183018 | SPNS2        |
| NR4A1_Medium |         |           |           |                   |         |           |           |               |                 |              |



| Condition    | peakChr | peakStart | peakEnd  | annotation        | geneChr | geneStart | geneEnd  | distanceToTSS | geneID          | geneSymbol   |
|--------------|---------|-----------|----------|-------------------|---------|-----------|----------|---------------|-----------------|--------------|
| NR4A1_Medium | chr17   | 39457277  | 39457677 | Promoter (3-4kb)  | 17      | 39461486  | 39534544 | -3809         | ENSG00000167258 | CDK12        |
| NR4A1_Medium | chr17   | 39725036  | 39725436 | Promoter (1-2kb)  | 17      | 39726495  | 39726561 | -1059         | ENSG00000265178 | MIR4728      |
| NR4A1_Medium | chr17   | 40246132  | 40246532 | Promoter (9-10kb) | 17      | 40256388  | 40260838 | -9856         | ENSG00000171475 | WIPF2        |
| NR4A1_Medium | chr17   | 41627684  | 41628084 | Promoter (<=1kb)  | 17      | 41627950  | 41628766 | 682           | ENSG00000214514 | KRT42P       |
| NR4A1_Medium | chr17   | 47901345  | 47901745 | Promoter (5-6kb)  | 17      | 47896262  | 47916223 | 5083          | ENSG00000167182 | SP2          |
| NR4A1_Medium | chr17   | 48786904  | 48787304 | Promoter (6-7kb)  | 17      | 48786249  | 48794294 | 6990          | ENSG00000170703 | TTLL6        |
| NR4A1_Medium | chr17   | 50071185  | 50071585 | Promoter (<=1kb)  | 17      | 50071740  | 50074211 | -155          | ENSG00000005884 | ITGA3        |
| NR4A1_Medium | chr17   | 50261994  | 50262394 | Promoter (9-10kb) | 17      | 50271406  | 50281485 | -9012         | ENSG00000167105 | TMEM92       |
| NR4A1_Medium | chr17   | 56105436  | 56105836 | Promoter (5-6kb)  | 17      | 56110958  | 56228550 | -5122         | ENSG00000153930 | ANKFN1       |
| NR4A1_Medium | chr17   | 67054448  | 67054848 | Promoter (9-10kb) | 17      | 67044554  | 67056797 | 9894          | ENSG00000108878 | CACNG1       |
| NR4A1_Medium | chr17   | 72504469  | 72504869 | Promoter (2-3kb)  | 17      | 72404558  | 72502334 | -2135         | ENSG00000227036 | LINC00673    |
| NR4A1_Medium | chr17   | 73375959  | 73376359 | Promoter (6-7kb)  | 17      | 73338443  | 73369213 | -6746         | ENSG00000069188 | SDK2         |
| NR4A1_Medium | chr17   | 73500161  | 73500561 | Promoter (7-8kb)  | 17      | 73504340  | 73507594 | 7033          | ENSG00000069188 | SDK2         |
| NR4A1_Medium | chr17   | 74732516  | 74732916 | Promoter (3-4kb)  | 17      | 74736598  | 74746192 | -3682         | ENSG00000172794 | RAB37        |
| NR4A1_Medium | chr17   | 75558694  | 75559094 | Promoter (<=1kb)  | 17      | 75558975  | 75563369 | 0             | ENSG00000073350 | LLGL2        |
| NR4A1_Medium | chr17   | 76841107  | 76841507 | Promoter (8-9kb)  | 17      | 76849840  | 76861836 | -8333         | ENSG00000267535 | LINC00868    |
| NR4A1_Medium | chr17   | 76924121  | 76924521 | Promoter (<=1kb)  | 17      | 76923850  | 76925020 | 271           | ENSG00000167889 | MGAT5B       |
| NR4A1_Medium | chr17   | 77484781  | 77485181 | Promoter (2-3kb)  | 17      | 77481913  | 77488788 | 2868          | ENSG00000184640 | SEPTIN9      |
| NR4A1_Medium | chr17   | 77509593  | 77509993 | Promoter (6-7kb)  | 17      | 77516887  | 77536592 | -6894         | ENSG00000267665 | LOC400622    |
| NR4A1_Medium | chr17   | 78121430  | 78121830 | Promoter (<=1kb)  | 17      | 78119062  | 78120796 | -634          | ENSG00000141524 | TMC6         |
| NR4A1_Medium | chr17   | 78798514  | 78798914 | Promoter (<=1kb)  | 17      | 78791863  | 78798492 | -22           | ENSG00000055483 | USP36        |
| NR4A1_Medium | chr17   | 79244751  | 79245151 | Promoter (8-9kb)  | 17      | 79090800  | 79235805 | -8946         | ENSG00000167281 | RBFOX3       |
| NR4A1_Medium | chr17   | 79498698  | 79499098 | Promoter (9-10kb) | 17      | 79094257  | 79508868 | 9770          | ENSG00000167281 | RBFOX3       |
| NR4A1_Medium | chr17   | 79700485  | 79700885 | Promoter (6-7kb)  | 17      | 79707176  | 79707249 | 6364          | ENSG00000266665 | MIR4739      |
| NR4A1_Medium | chr17   | 80250639  | 80251039 | Promoter (2-3kb)  | 17      | 80248214  | 80252899 | 2425          | ENSG00000181045 | SLC26A11     |
| NR4A1_Medium | chr17   | 80281405  | 80281805 | Promoter (6-7kb)  | 17      | 80287959  | 80336900 | -6154         | ENSG00000173821 | RNF213       |
| NR4A1_Medium | chr17   | 80930176  | 80930576 | Promoter (7-8kb)  | 17      | 80922724  | 80924172 | 7452          | ENSG00000141564 | RPTOR        |
| NR4A1_Medium | chr17   | 81253464  | 81253864 | Promoter (1-2kb)  | 17      | 81246178  | 81252273 | -1191         | ENSG00000157637 | SLC38A10     |
| NR4A1_Medium | chr17   | 81300426  | 81300826 | Promoter (4-5kb)  | 17      | 81282189  | 81295547 | -4879         | ENSG00000157637 | SLC38A10     |
| NR4A1_Medium | chr17   | 82441364  | 82441764 | Promoter (1-2kb)  | 17      | 82440114  | 82442352 | 1250          | ENSG00000169660 | HEXD         |
| NR4A1_Medium | chr17   | 82717972  | 82718372 | Promoter (<=1kb)  | 17      | 82719017  | 82726493 | -645          | ENSG00000141560 | FN3KRP       |
| NR4A1_Medium | chr17   | 82739684  | 82740084 | Promoter (3-4kb)  | 17      | 82736072  | 82749895 | 3612          | ENSG00000167363 | FN3K         |
| NR4A1_Medium | chr18   | 107969    | 108375   | Promoter (<=1kb)  | 18      | 109065    | 122219   | -690          | ENSG00000263006 | ROCK1P1      |
| NR4A1_Medium | chr18   | 110196    | 110614   | Promoter (1-2kb)  | 18      | 109065    | 122219   | 1131          | ENSG00000263006 | ROCK1P1      |
| NR4A1_Medium | chr18   | 10756577  | 10756977 | Promoter (2-3kb)  | 18      | 10759584  | 10759649 | 2672          | ENSG00000274838 | MIR6788      |
| NR4A1_Medium | chr18   | 12430622  | 12431022 | Promoter (1-2kb)  | 18      | 12432897  | 12437635 | -1875         | NA              | LOC105371998 |
| NR4A1_Medium | chr18   | 12654070  | 12654470 | Promoter (<=1kb)  | 18      | 12506496  | 12653085 | -985          | ENSG00000134278 | SPIRE1       |
| NR4A1_Medium | chr18   | 23641251  | 23641651 | Promoter (6-7kb)  | 18      | 23600010  | 23647997 | 6346          | ENSG00000154065 | ANKRD29      |
| NR4A1_Medium | chr18   | 41639232  | 41639632 | Promoter (7-8kb)  | 18      | 41482476  | 41632185 | -7047         | ENSG00000267313 | KC6          |
| NR4A1_Medium | chr18   | 58459608  | 58460008 | Promoter (8-9kb)  | 18      | 58451080  | 58451152 | -8456         | ENSG00000207778 | MIR3591      |
| NR4A1_Medium | chr18   | 74295328  | 74295728 | Promoter (3-4kb)  | 18      | 74253438  | 74291973 | -3355         | ENSG00000166347 | CYB5A        |
| NR4A1_Medium | chr18   | 80250823  | 80251223 | Promoter (3-4kb)  | 18      | 80157232  | 80247514 | -3309         | ENSG00000178184 | PARD6G       |
| NR4A1_Medium | chr19   | 375597    | 375997   | Promoter (<=1kb)  | 19      | 362057    | 375970   | 0             | ENSG00000105549 | THEG         |
| NR4A1_Medium | chr19   | 443632    | 444130   | Promoter (4-5kb)  | 19      | 435779    | 439267   | -4365         | ENSG00000129946 | SHC2         |
| NR4A1_Medium | chr19   | 464939    | 465339   | Promoter (3-4kb)  | 19      | 416583    | 460996   | -3943         | ENSG00000129946 | SHC2         |
| NR4A1_Medium | chr19   | 1569849   | 1570249  | Promoter (1-2kb)  | 19      | 1554669   | 1568058  | -1791         | ENSG00000181588 | MEX3D        |
| NR4A1_Medium | chr19   | 1583039   | 1583439  | Promoter (1-2kb)  | 19      | 1581108   | 1584573  | 1134          | ENSG00000071655 | MBD3         |
| NR4A1_Medium | chr19   | 1642012   | 1642412  | Promoter (7-8kb)  | 19      | 1609290   | 1650287  | 7875          | ENSG00000071564 | TCF3         |
| NR4A1_Medium | chr19   | 1795411   | 1795811  | Promoter (4-5kb)  | 19      | 1785558   | 1790817  | -4594         | ENSG00000130270 | ATP8B3       |
| NR4A1_Medium | chr19   | 2204060   | 2204460  | Promoter (7-8kb)  | 19      | 2212237   | 2214572  | -7777         | ENSG00000104885 | DOT1L        |
| NR4A1_Medium | chr19   | 2444434   | 2444834  | Promoter (7-8kb)  | 19      | 2434295   | 2437158  | -7276         | ENSG00000176619 | LMNB2        |
| NR4A1_Medium | chr19   | 2711256   | 2711656  | Promoter (8-9kb)  | 19      | 2511219   | 2702694  | -8562         | ENSG00000176533 | GNG7         |
| NR4A1_Medium | chr19   | 3322757   | 3323157  | Promoter (8-9kb)  | 19      | 3314403   | 3469217  | 8354          | ENSG00000141905 | NFIC         |
| NR4A1_Medium | chr19   | 3476812   | 3477212  | Promoter (1-2kb)  | 19      | 3474407   | 3478488  | 1267          | ENSG00000095932 | SMIM24       |
| NR4A1_Medium | chr19   | 3479372   | 3479772  | Promoter (<=1kb)  | 19      | 3474508   | 3479088  | -284          | ENSG00000095932 | SMIM24       |
| NR4A1_Medium | chr19   | 3774299   | 3774699  | Promoter (2-3kb)  | 19      | 3769089   | 3772221  | -2078         | ENSG00000173976 | RAX2         |
| NR4A1_Medium | chr19   | 3923666   | 3924107  | Promoter (8-9kb)  | 19      | 3933103   | 3942414  | -8996         | ENSG00000077009 | NMRK2        |
| NR4A1_Medium | chr19   | 4036371   | 4036771  | Promoter (7-8kb)  | 19      | 4028461   | 4028814  | 7910          | ENSG00000105229 | PIAS4        |
| NR4A1_Medium | chr19   | 4107233   | 4107633  | Promoter (2-3kb)  | 19      | 4099409   | 4104792  | -2441         | ENSG00000126934 | MAP2K2       |
| NR4A1_Medium | chr19   | 4381217   | 4381617  | Promoter (<=1kb)  | 19      | 4363853   | 4380292  | -925          | ENSG00000141985 | SH3GL1       |
| NR4A1_Medium | chr19   | 4786347   | 4786747  | Promoter (4-5kb)  | 19      | 4791734   | 4801273  | -4987         | ENSG00000141965 | FEM1A        |
| NR4A1_Medium | chr19   | 5114118   | 5114518  | Promoter (1-2kb)  | 19      | 5112358   | 5119682  | 1760          | ENSG00000127663 | KDM4B        |
| NR4A1_Medium | chr19   | 5117075   | 5117475  | Promoter (4-5kb)  | 19      | 5112358   | 5119682  | 4717          | ENSG00000127663 | KDM4B        |
| NR4A1_Medium | chr19   | 5566731   | 5567131  | Promoter (<=1kb)  | 19      | 5561632   | 5567831  | 700           | ENSG00000223573 | TINCR        |
| NR4A1_Medium | chr19   | 5577228   | 5577628  | Promoter (<=1kb)  | 19      | 5560774   | 5578349  | 721           | ENSG00000223573 | TINCR        |
| NR4A1_Medium | chr19   | 6132128   | 6132528  | Promoter (2-3kb)  | 19      | 6135247   | 6151797  | -2719         | ENSG00000130377 | ACSBG2       |
| NR4A1_Medium | chr19   | 6511506   | 6511906  | Promoter (8-9kb)  | 19      | 6496176   | 6502848  | -8658         | ENSG00000104833 | TUBB4A       |
| NR4A1_Medium | chr19   | 6709927   | 6710327  | Promoter (<=1kb)  | 19      | 6709756   | 6710957  | 630           | ENSG00000125730 | C3           |
| NR4A1_Medium | chr19   | 6717324   | 6717724  | Promoter (2-3kb)  | 19      | 6677704   | 6720650  | 2926          | ENSG00000125730 | C3           |
| NR4A1_Medium | chr19   | 7164476   | 7164876  | Promoter (3-4kb)  | 19      | 7159423   | 7167978  | 3102          | ENSG00000171105 | INSR         |
| NR4A1_Medium | chr19   | 7358109   | 7358509  | Promoter (2-3kb)  | 19      | 7355616   | 7383385  | 2493          | ENSG00000104880 | ARHGEF18     |
| NR4A1_Medium | chr19   | 7616997   | 7617397  | Promoter (<=1kb)  | 19      | 7617439   | 7617505  | -42           | ENSG00000273657 | MIR6792      |
| NR4A1_Medium | chr19   | 8107302   | 8107702  | Promoter (4-5kb)  | 19      | 8110888   | 8111806  | 4104          | ENSG00000142449 | FBN3         |
| NR4A1_Medium | chr19   | 8263034   | 8263434  | Promoter (1-2kb)  | 19      | 8261627   | 8262421  | 1407          | ENSG00000090661 | CERS4        |
| NR4A1_Medium | chr19   | 8553763   | 8554163  | Promoter (<=1kb)  | 19      | 8551423   | 8554564  | 401           | ENSG00000142347 | MYO1F        |
| NR4A1_Medium | chr19   | 8867659   | 8868059  | Promoter (<=1kb)  | 19      | 8863316   | 8867014  | -645          | ENSG00000181143 | MUC16        |
| NR4A1_Medium | chr19   | 9259767   | 9260167  | Promoter (8-9kb)  | 19      | 9250930   | 9252479  | 8837          | ENSG00000237521 | OR7E24       |
| NR4A1_Medium | chr19   | 9603883   | 9604283  | Promoter (9-10kb) | 19      | 9611029   | 9614280  | 9997          | ENSG00000171469 | ZNF561       |
| NR4A1_Medium | chr19   | 10331215  | 10331615 | Promoter (1-2kb)  | 19      | 10323506  | 10333491 | 1876          | ENSG00000161847 | RAVER1       |
| NR4A1_Medium | chr19   | 10608835  | 10609235 | Promoter (6-7kb)  | 19      | 10602510  | 10644550 | 6325          | ENSG00000129353 | SLC44A2      |
| NR4A1_Medium | chr19   | 10782144  | 10782544 | Promoter (<=1kb)  | 19      | 10783016  | 10812300 | -472          | ENSG00000079805 | LNMB2        |
| NR4A1_Medium | chr19   | 13604210  | 13604610 | Promoter (4-5kb)  | 19      | 13208046  | 13599946 | -4264         | ENSG00000141837 | CACNA1A      |
| NR4A1_Medium | chr19   | 14701355  | 14701755 | Promoter (7-8kb)  | 19      | 14693451  | 14720793 | 7904          | ENSG00000160961 | ZNF333       |
| NR4A1_Medium | chr19   | 15402213  | 15402613 | Promoter (<=1kb)  | 19      | 15400400  | 15401276 | -937          | ENSG00000011243 | AKAP8L       |
| NR4A1_Medium | chr19   | 15812368  | 15812768 | Promoter (4-5kb)  | 19      | 15807003  | 15808126 | -4242         | ENSG00000186723 | OR10H1       |
| NR4A1_Medium | chr19   | 16037243  | 16037643 | Promoter (3-4kb)  | 19      | 16034120  | 16042111 | 3123          | ENSG00000167459 | LINC00905    |
| NR4A1_Medium | chr19   | 16043065  | 16043465 | Promoter (8-9kb)  | 19      | 16034120  | 16042111 | 8945          | ENSG00000167459 | LINC00905    |
| NR4A1_Medium | chr19   | 16068756  | 16069156 | Promoter (1-2kb)  | 19      | 16067733  | 16102875 | 1023          | ENSG00000167460 | TPM4         |
| NR4A1_Medium | chr19   | 16428084  | 16428484 | Promoter (6-7kb)  | 19      | 16417439  | 16421433 | -6651         | ENSG00000127527 | EPS15L1      |
| NR4A1_Medium | chr19   | 16724819  | 16725219 | Promoter (2-3kb)  | 19      | 16727254  | 16817963 | -2035         | ENSG00000188039 | NWD1         |
| NR4A1_Medium | chr19   | 17962925  | 17963325 | Promoter (3-4kb)  | 19      | 17967125  | 17974113 | -3800         | ENSG00000105642 | KCNN1        |
| NR4A1_Medium | chr19   | 18654079  | 18654479 | Promoter (9-10kb) | 19      | 18644638  | 18667992 | 9441          | ENSG00000167487 | KLHL26       |
| NR4A1_Medium | chr19   | 18853553  | 18853953 | Promoter (<=1kb)  | 19      | 18852998  | 18855157 | 555           | ENSG00000005007 | UPF1         |
| NR4A1_Medium | chr19   | 29390459  | 29390859 | Promoter (6-7kb)  | 19      | 29396469  | 29397810 | 6951          | ENSG00000264515 | LOC284395    |
| NR4A1_Medium | chr19   | 33138330  | 33138730 | Promoter (6-7kb)  | 19      | 33132114  | 33175799 | 6216          | ENSG00000166359 | WDR88        |
| NR4A1        |         |           |          |                   |         |           |          |               |                 |              |

| Condition    | peakChr | peakStart | peakEnd  | annotation        | geneChr | geneStart | geneEnd  | distanceToTSS | geneID          | geneSymbol   |
|--------------|---------|-----------|----------|-------------------|---------|-----------|----------|---------------|-----------------|--------------|
| NR4A1_Medium | chr19   | 41902928  | 41903328 | Promoter (<=1kb)  | 19      | 41902798  | 41906561 | 130           | ENSG00000076928 | ARHGEF1      |
| NR4A1_Medium | chr19   | 41914390  | 41914790 | Promoter (7-8kb)  | 19      | 41906576  | 41907452 | 7814          | ENSG00000076928 | ARHGEF1      |
| NR4A1_Medium | chr19   | 42265004  | 42265404 | Promoter (3-4kb)  | 19      | 42268537  | 42295796 | -3133         | ENSG00000079432 | CIC          |
| NR4A1_Medium | chr19   | 44410995  | 44411395 | Promoter (9-10kb) | 19      | 44329695  | 44401608 | -9387         | ENSG00000062370 | ZNF112       |
| NR4A1_Medium | chr19   | 44525319  | 44525719 | Promoter (3-4kb)  | 19      | 44506159  | 44529525 | 3806          | ENSG00000273777 | CEACAM20     |
| NR4A1_Medium | chr19   | 44933444  | 44933844 | Promoter (6-7kb)  | 19      | 44926976  | 44931058 | 6468          | ENSG00000214855 | APOC1P1      |
| NR4A1_Medium | chr19   | 45241260  | 45241660 | Promoter (3-4kb)  | 19      | 45212621  | 45245431 | 3771          | ENSG00000283632 | EXOC3L2      |
| NR4A1_Medium | chr19   | 45252870  | 45253270 | Promoter (1-2kb)  | 19      | 45251387  | 45303681 | 1483          | ENSG00000007047 | MARK4        |
| NR4A1_Medium | chr19   | 45265429  | 45265829 | Promoter (<=1kb)  | 19      | 45264687  | 45288552 | 742           | ENSG00000007047 | MARK4        |
| NR4A1_Medium | chr19   | 46329753  | 46330153 | Promoter (7-8kb)  | 19      | 46321780  | 46331496 | 7973          | ENSG00000124440 | HIF3A        |
| NR4A1_Medium | chr19   | 47042099  | 47042499 | Promoter (6-7kb)  | 19      | 47045909  | 47048624 | 6125          | ENSG00000130748 | TMEM160      |
| NR4A1_Medium | chr19   | 47052263  | 47052859 | Promoter (3-4kb)  | 19      | 47045909  | 47048624 | -3639         | ENSG00000130748 | TMEM160      |
| NR4A1_Medium | chr19   | 47473609  | 47474009 | Promoter (1-2kb)  | 19      | 47465735  | 47471893 | -1716         | ENSG00000118160 | SLC8A2       |
| NR4A1_Medium | chr19   | 47769379  | 47769779 | Promoter (<=1kb)  | 19      | 47757036  | 47768840 | -539          | ENSG00000269656 | NOP53-AS1    |
| NR4A1_Medium | chr19   | 47820277  | 47820677 | Promoter (<=1kb)  | 19      | 47819779  | 47836314 | 498           | ENSG00000105392 | CRX          |
| NR4A1_Medium | chr19   | 48087544  | 48087944 | Promoter (2-3kb)  | 19      | 48074438  | 48085110 | -2434         | ENSG00000105499 | PLA2G4C      |
| NR4A1_Medium | chr19   | 48139555  | 48139955 | Promoter (1-2kb)  | 19      | 48135754  | 48137891 | -1664         | ENSG00000105486 | LIG1         |
| NR4A1_Medium | chr19   | 48821561  | 48821961 | Promoter (6-7kb)  | 19      | 48813018  | 48815072 | -6489         | ENSG00000087076 | HSD17B14     |
| NR4A1_Medium | chr19   | 49166453  | 49166853 | Promoter (<=1kb)  | 19      | 49167644  | 49168337 | -791          | ENSG00000130529 | TRPM4        |
| NR4A1_Medium | chr19   | 49193868  | 49194268 | Promoter (4-5kb)  | 19      | 49188868  | 49196716 | 5000          | ENSG00000130529 | TRPM4        |
| NR4A1_Medium | chr19   | 50169742  | 50170142 | Promoter (6-7kb)  | 19      | 50152548  | 50163195 | -6547         | ENSG00000161652 | IZUMO2       |
| NR4A1_Medium | chr19   | 50513329  | 50513729 | Promoter (<=1kb)  | 19      | 50511603  | 50513913 | 184           | ENSG00000204653 | ASPDH        |
| NR4A1_Medium | chr19   | 50644375  | 50644775 | Promoter (4-5kb)  | 19      | 50621977  | 50639881 | -4494         | ENSG00000213023 | SYT3         |
| NR4A1_Medium | chr19   | 50645129  | 50645529 | Promoter (3-4kb)  | 19      | 50649445  | 50659306 | -3916         | ENSG00000235034 | C19orf81     |
| NR4A1_Medium | chr19   | 50707838  | 50708238 | Promoter (3-4kb)  | 19      | 50703699  | 50704506 | -3332         | ENSG00000161681 | SHANK1       |
| NR4A1_Medium | chr19   | 50715280  | 50715680 | Promoter (1-2kb)  | 19      | 50661965  | 50716919 | 1239          | ENSG00000161681 | SHANK1       |
| NR4A1_Medium | chr19   | 50944795  | 50945195 | Promoter (7-8kb)  | 19      | 50943308  | 50952668 | 7473          | ENSG00000167754 | KLK5         |
| NR4A1_Medium | chr19   | 50969850  | 50970250 | Promoter (<=1kb)  | 19      | 50958632  | 50969673 | -177          | ENSG00000167755 | KLK6         |
| NR4A1_Medium | chr19   | 50978795  | 50979195 | Promoter (4-5kb)  | 19      | 50976488  | 50983815 | 4620          | ENSG00000169035 | KLK7         |
| NR4A1_Medium | chr19   | 51083226  | 51083626 | Promoter (<=1kb)  | 19      | 51077969  | 51082886 | -340          | ENSG00000129437 | KLK14        |
| NR4A1_Medium | chr19   | 51693647  | 51694047 | Promoter (<=1kb)  | 19      | 51693496  | 51705190 | 151           | ENSG00000182310 | SPACA6       |
| NR4A1_Medium | chr19   | 52941112  | 52941512 | Promoter (1-2kb)  | 19      | 52927135  | 52942601 | 1089          | ENSG00000213801 | ZNF321P      |
| NR4A1_Medium | chr19   | 53624183  | 53624583 | Promoter (7-8kb)  | 19      | 53632056  | 53637009 | -7473         | ENSG00000204595 | DPRX         |
| NR4A1_Medium | chr19   | 53988145  | 53988545 | Promoter (3-4kb)  | 19      | 53992288  | 54012664 | -3743         | ENSG00000130433 | CACNG6       |
| NR4A1_Medium | chr19   | 55434365  | 55434765 | Promoter (7-8kb)  | 19      | 55431976  | 55442337 | 7572          | ENSG00000187902 | SHISA7       |
| NR4A1_Medium | chr19   | 55542869  | 55543269 | Promoter (2-3kb)  | 19      | 55544248  | 55545522 | 2253          | ENSG00000231274 | SBK3         |
| NR4A1_Medium | chr19   | 56158930  | 56159400 | Promoter (1-2kb)  | 19      | 56157309  | 56159967 | 1621          | ENSG00000167685 | ZNF444       |
| NR4A1_Medium | chr19   | 56175394  | 56175794 | Promoter (<=1kb)  | 19      | 56176008  | 56185775 | -214          | ENSG00000197487 | GALP         |
| NR4A1_Medium | chr19   | 56560249  | 56560649 | Promoter (6-7kb)  | 19      | 56567468  | 56582894 | -6819         | ENSG00000197016 | ZNF470       |
| NR4A1_Medium | chr19   | 56595562  | 56595962 | Promoter (<=1kb)  | 19      | 56595335  | 56610543 | 227           | NA              | ZNF71-SMIM17 |
| NR4A1_Medium | chr19   | 57159117  | 57159517 | Promoter (7-8kb)  | 19      | 57154021  | 57167443 | 7926          | ENSG00000258873 | DUXA         |
| NR4A1_Medium | chr19   | 57663587  | 57663987 | Promoter (4-5kb)  | 19      | 57668935  | 57679152 | -4948         | ENSG00000180532 | ZSCAN4       |
| NR4A1_Medium | chr20   | 2863543   | 2863943  | Promoter (<=1kb)  | 20      | 2863371   | 2865038  | 172           | ENSG00000215305 | VPS16        |
| NR4A1_Medium | chr20   | 25494316  | 25494716 | Promoter (2-3kb)  | 20      | 25488983  | 25496803 | 2087          | ENSG00000101004 | NINL         |
| NR4A1_Medium | chr20   | 26073996  | 26074440 | Promoter (1-2kb)  | 20      | 26072673  | 26082955 | 1323          | ENSG00000125804 | FAM182A      |
| NR4A1_Medium | chr20   | 30283702  | 30284179 | Promoter (5-6kb)  | 20      | 30278906  | 30289205 | 5026          | NA              | LINC01597    |
| NR4A1_Medium | chr20   | 30285954  | 30286354 | Promoter (2-3kb)  | 20      | 30278906  | 30289205 | 2851          | NA              | LINC01597    |
| NR4A1_Medium | chr20   | 30412979  | 30413379 | Promoter (9-10kb) | 20      | 30403123  | 30403384 | -9595         | NA              | MLLT10P1     |
| NR4A1_Medium | chr20   | 31417983  | 31418383 | Promoter (5-6kb)  | 20      | 31404845  | 31412838 | -5145         | ENSG00000204548 | DEFB121      |
| NR4A1_Medium | chr20   | 33074665  | 33075065 | Promoter (4-5kb)  | 20      | 33079644  | 33092505 | -4579         | ENSG00000186191 | BPIFB4       |
| NR4A1_Medium | chr20   | 35579644  | 35580044 | Promoter (<=1kb)  | 20      | 35576176  | 35579261 | -383          | ENSG00000088340 | FER1L4       |
| NR4A1_Medium | chr20   | 38589889  | 38590289 | Promoter (8-9kb)  | 20      | 38581195  | 38588463 | 8694          | ENSG00000182035 | ADIG         |
| NR4A1_Medium | chr20   | 38627386  | 38627786 | Promoter (<=1kb)  | 20      | 38626996  | 38650508 | 390           | ENSG00000124143 | ARHGAP40     |
| NR4A1_Medium | chr20   | 44722845  | 44723245 | Promoter (<=1kb)  | 20      | 44723657  | 44728509 | -412          | ENSG00000064205 | CCN5         |
| NR4A1_Medium | chr20   | 45584845  | 45585245 | Promoter (5-6kb)  | 20      | 45551762  | 45579326 | -5519         | ENSG00000158901 | WFDC8        |
| NR4A1_Medium | chr20   | 48930635  | 48931035 | Promoter (8-9kb)  | 20      | 48921711  | 49036693 | 8924          | ENSG00000124198 | ARFGF2       |
| NR4A1_Medium | chr20   | 50135494  | 50135894 | Promoter (4-5kb)  | 20      | 50123770  | 50131132 | -4362         | ENSG00000240849 | PEDS1        |
| NR4A1_Medium | chr20   | 50609687  | 50610087 | Promoter (4-5kb)  | 20      | 50614636  | 50614785 | 4698          | ENSG00000221091 | MIR1302-5    |
| NR4A1_Medium | chr20   | 57218776  | 57219176 | Promoter (3-4kb)  | 20      | 57214872  | 57215866 | 3904          | NA              | BMP7-AS1     |
| NR4A1_Medium | chr20   | 57223347  | 57223747 | Promoter (<=1kb)  | 20      | 57171039  | 57224685 | 938           | ENSG00000101144 | BMP7         |
| NR4A1_Medium | chr20   | 58695032  | 58695432 | Promoter (<=1kb)  | 20      | 58694421  | 58713580 | 611           | ENSG00000254995 | STX16-NPEPL1 |
| NR4A1_Medium | chr20   | 59674267  | 59674842 | Promoter (1-2kb)  | 20      | 59676661  | 59847711 | -1819         | ENSG00000087495 | PHACTR3      |
| NR4A1_Medium | chr20   | 60314533  | 60314933 | Promoter (6-7kb)  | 20      | 60308474  | 60308567 | 6059          | ENSG00000207802 | MIR646       |
| NR4A1_Medium | chr20   | 62229453  | 62229853 | Promoter (2-3kb)  | 20      | 62231922  | 62236299 | -2069         | ENSG00000130703 | LOC105369209 |
| NR4A1_Medium | chr20   | 62397908  | 62398308 | Promoter (1-2kb)  | 20      | 62391014  | 62396331 | -1577         | ENSG00000149679 | CABLES2      |
| NR4A1_Medium | chr20   | 62565770  | 62566170 | Promoter (<=1kb)  | 20      | 62564912  | 62565013 | 858           | ENSG00000284508 | MIR133A2     |
| NR4A1_Medium | chr20   | 62778109  | 62778509 | Promoter (1-2kb)  | 20      | 62774121  | 62776996 | -1113         | ENSG00000228705 | LINC00659    |
| NR4A1_Medium | chr20   | 63172034  | 63172434 | Promoter (6-7kb)  | 20      | 63178500  | 63178586 | -6066         | ENSG00000207598 | MIR124-3     |
| NR4A1_Medium | chr20   | 63492290  | 63492692 | Promoter (6-7kb)  | 20      | 63490081  | 63498748 | 6056          | ENSG00000101210 | EEF1A2       |
| NR4A1_Medium | chr20   | 63598222  | 63598622 | Promoter (6-7kb)  | 20      | 63587602  | 63604902 | 6280          | ENSG00000101216 | GMEB2        |
| NR4A1_Medium | chr20   | 64047115  | 64047515 | Promoter (2-3kb)  | 20      | 64047582  | 64049639 | 2124          | ENSG00000203883 | SOX18        |
| NR4A1_Medium | chr21   | 8219759   | 8220183  | Promoter (7-8kb)  | 21      | 8212572   | 8212724  | 7187          | ENSG00000276700 | RNA5-8SN4    |
| NR4A1_Medium | chr21   | 8991144   | 8991544  | Promoter (4-5kb)  | 21      | 8986999   | 8987178  | 4145          | ENSG00000275708 | MIR3648-1    |
| NR4A1_Medium | chr21   | 8991733   | 8992133  | Promoter (4-5kb)  | 21      | 8986999   | 8987178  | 4734          | ENSG00000275708 | MIR3648-1    |
| NR4A1_Medium | chr21   | 28876936  | 28877336 | Promoter (8-9kb)  | 21      | 28872191  | 28885367 | 8031          | ENSG00000156239 | N6AMT1       |
| NR4A1_Medium | chr21   | 32586779  | 32587179 | Promoter (<=1kb)  | 21      | 32576848  | 32587373 | 194           | ENSG00000242220 | TCP10L       |
| NR4A1_Medium | chr21   | 34115877  | 34116277 | Promoter (5-6kb)  | 21      | 34122174  | 34143034 | -5897         | ENSG00000243927 | MRPS6        |
| NR4A1_Medium | chr21   | 34152246  | 34152646 | Promoter (5-6kb)  | 21      | 34157724  | 34188917 | -5078         | ENSG00000227456 | LINC00310    |
| NR4A1_Medium | chr21   | 36539619  | 36540019 | Promoter (2-3kb)  | 21      | 36460621  | 36542600 | 2581          | ENSG00000159261 | CLDN14       |
| NR4A1_Medium | chr21   | 41139247  | 41139647 | Promoter (7-8kb)  | 21      | 41143180  | 41147433 | 7786          | ENSG00000226496 | LINC00323    |
| NR4A1_Medium | chr21   | 41150538  | 41150938 | Promoter (2-3kb)  | 21      | 41141493  | 41148198 | -2340         | ENSG00000226496 | LINC00323    |
| NR4A1_Medium | chr21   | 41796822  | 41797222 | Promoter (5-6kb)  | 21      | 41801628  | 41803118 | 5896          | ENSG00000141956 | PRDM15       |
| NR4A1_Medium | chr21   | 41813106  | 41813506 | Promoter (1-2kb)  | 21      | 41798225  | 41814962 | 1456          | ENSG00000141956 | PRDM15       |
| NR4A1_Medium | chr21   | 41864999  | 41865399 | Promoter (1-2kb)  | 21      | 41798225  | 41863302 | -1697         | ENSG00000141956 | PRDM15       |
| NR4A1_Medium | chr21   | 42104270  | 42104670 | Promoter (3-4kb)  | 21      | 42102134  | 42108534 | 3864          | ENSG00000184385 | UMODL1-AS1   |
| NR4A1_Medium | chr21   | 42759310  | 42759710 | Promoter (2-3kb)  | 21      | 42762214  | 42768412 | -2504         | ENSG00000160191 | PDE9A        |
| NR4A1_Medium | chr21   | 44558284  | 44558684 | Promoter (<=1kb)  | 21      | 44557790  | 44558795 | 111           | ENSG00000212935 | KRTAP10-3    |
| NR4A1_Medium | chr21   | 44612808  | 44613208 | Promoter (<=1kb)  | 21      | 44612079  | 44612954 | 729           | ENSG00000187766 | KRTAP10-8    |
| NR4A1_Medium | chr21   | 44697324  | 44697724 | Promoter (<=1kb)  | 21      | 44697172  | 44698044 | 152           | ENSG00000189169 | KRTAP10-12   |
| NR4A1_Medium | chr21   | 45479355  | 45479755 | Promoter (1-2kb)  | 21      | 45478266  | 45478326 | 1089          | ENSG00000275167 | MIR6815      |
| NR4A1_Medium | chr21   | 45508017  | 45508417 | Promoter (1-2kb)  | 21      | 45506019  | 45512567 | 1998          | ENSG00000182871 | COL18A1      |
| NR4A1_Medium | chr21   | 45898067  | 45898467 | Promoter (1-2kb)  | 21      | 45896294  | 45941706 | 1773          | ENSG00000183570 | PCBP3        |
| NR4A1_Medium | chr21   | 45901490  | 45901890 | Promoter (<=1kb)  | 21      | 45901015  | 45940199 | 475           | ENSG00000183570 | PCBP3        |
| NR4A1_Medium | chr21   | 45984777  | 45985177 | Promoter (1-2kb)  | 21      | 45987109  | 45987633 | -1932         | ENSG00000       |              |



| Condition    | peakChr | peakStart | peakEnd   | annotation        | geneChr | geneStart | geneEnd   | distanceToTSS | geneID          | geneSymbol   |
|--------------|---------|-----------|-----------|-------------------|---------|-----------|-----------|---------------|-----------------|--------------|
| NR4A1_Medium | chr22   | 29712026  | 29712426  | Promoter (7-8kb)  | 22      | 29720003  | 29731833  | -7577         | ENSG00000100314 | CABP7        |
| NR4A1_Medium | chr22   | 32542255  | 32542655  | Promoter (<=1kb)  | 22      | 32527672  | 32541716  | -539          | ENSG00000185666 | SYN3         |
| NR4A1_Medium | chr22   | 35343381  | 35343781  | Promoter (<=1kb)  | 22      | 35344186  | 35347983  | -405          | ENSG00000100284 | TOM1         |
| NR4A1_Medium | chr22   | 37493438  | 37493838  | Promoter (<=1kb)  | 22      | 37490363  | 37494576  | 738           | ENSG00000100065 | CARD10       |
| NR4A1_Medium | chr22   | 37665631  | 37666031  | Promoter (<=1kb)  | 22      | 37664911  | 37666932  | 720           | ENSG00000241360 | PDXP         |
| NR4A1_Medium | chr22   | 38140854  | 38141254  | Promoter (<=1kb)  | 22      | 38129518  | 38140033  | -821          | ENSG00000184381 | PLA2G6       |
| NR4A1_Medium | chr22   | 39430534  | 39430934  | Promoter (1-2kb)  | 22      | 39432431  | 39437060  | -1497         | NA              | LOC100506472 |
| NR4A1_Medium | chr22   | 39563808  | 39564208  | Promoter (6-7kb)  | 22      | 39570753  | 39684528  | -6545         | ENSG00000100346 | CACNA11      |
| NR4A1_Medium | chr22   | 39565901  | 39566301  | Promoter (4-5kb)  | 22      | 39570753  | 39684528  | -4452         | ENSG00000100346 | CACNA11      |
| NR4A1_Medium | chr22   | 39646195  | 39646595  | Promoter (3-4kb)  | 22      | 39642797  | 39643512  | 3398          | ENSG00000100346 | CACNA11      |
| NR4A1_Medium | chr22   | 41449888  | 41450388  | Promoter (3-4kb)  | 22      | 41433494  | 41446801  | -3187         | ENSG00000183864 | TOB2         |
| NR4A1_Medium | chr22   | 41671755  | 41672155  | Promoter (4-5kb)  | 22      | 41673934  | 41676323  | 4168          | ENSG00000100138 | SNU13        |
| NR4A1_Medium | chr22   | 42430100  | 42430500  | Promoter (1-2kb)  | 22      | 42410277  | 42432362  | 1862          | ENSG00000235568 | NFAM1        |
| NR4A1_Medium | chr22   | 43280348  | 43280748  | Promoter (4-5kb)  | 22      | 43275955  | 43283830  | 4393          | ENSG00000203527 | SCUBE1-AS1   |
| NR4A1_Medium | chr22   | 43579495  | 43579895  | Promoter (9-10kb) | 22      | 43528744  | 43570143  | -9352         | ENSG00000186976 | EFCAB6       |
| NR4A1_Medium | chr22   | 44146132  | 44146532  | Promoter (9-10kb) | 22      | 44136464  | 44139124  | 9668          | ENSG00000188677 | PARVB        |
| NR4A1_Medium | chr22   | 44438434  | 44438834  | Promoter (4-5kb)  | 22      | 44443327  | 44444788  | -4493         | ENSG00000232655 | LINC01656    |
| NR4A1_Medium | chr22   | 44618943  | 44619343  | Promoter (6-7kb)  | 22      | 44606939  | 44625419  | 6076          | NA              | LINC00229    |
| NR4A1_Medium | chr22   | 44965286  | 44965686  | Promoter (3-4kb)  | 22      | 44916455  | 44969083  | 3397          | ENSG00000056487 | PHF21B       |
| NR4A1_Medium | chr22   | 47343218  | 47343618  | Promoter (1-2kb)  | 22      | 47345569  | 47373541  | -1951         | ENSG00000224715 | LOC339685    |
| NR4A1_Medium | chr22   | 47344797  | 47345197  | Promoter (<=1kb)  | 22      | 47345569  | 47373541  | -372          | ENSG00000224715 | LOC339685    |
| NR4A1_Medium | chr22   | 47631820  | 47632220  | Promoter (<=1kb)  | 22      | 47631992  | 47638225  | 0             | ENSG00000224271 | LOC284930    |
| NR4A1_Medium | chr22   | 48269231  | 48269631  | Promoter (4-5kb)  | 22      | 48274364  | 48274415  | -4733         | ENSG00000266508 | MIR3201      |
| NR4A1_Medium | chr22   | 48542332  | 48542732  | Promoter (4-5kb)  | 22      | 48538902  | 48547342  | 4610          | ENSG00000281732 | LOC284933    |
| NR4A1_Medium | chr22   | 48686735  | 48687135  | Promoter (6-7kb)  | 22      | 48693247  | 48750408  | -6112         | ENSG00000219438 | TAF5         |
| NR4A1_Medium | chr22   | 48697638  | 48698038  | Promoter (4-5kb)  | 22      | 48693247  | 48750408  | 4391          | ENSG00000219438 | TAF5         |
| NR4A1_Medium | chr22   | 48859037  | 48859437  | Promoter (7-8kb)  | 22      | 48866770  | 48898386  | -7333         | ENSG00000205632 | LINC01310    |
| NR4A1_Medium | chr22   | 50339728  | 50340128  | Promoter (3-4kb)  | 22      | 50343304  | 50445090  | -3176         | ENSG00000100239 | PPP6R2       |
| NR4A1_Medium | chr22   | 50346835  | 50347235  | Promoter (3-4kb)  | 22      | 50343331  | 50444374  | 3504          | ENSG00000100239 | PPP6R2       |
| NR4A1_R848   | chr1    | 1289929   | 1290329   | Promoter (2-3kb)  | 1       | 1287109   | 1290943   | 2820          | ENSG00000162572 | SCNN1D       |
| NR4A1_R848   | chr1    | 1366288   | 1366688   | Promoter (4-5kb)  | 1       | 1352692   | 1361777   | -4511         | ENSG00000162576 | MXRA8        |
| NR4A1_R848   | chr1    | 1366867   | 1367267   | Promoter (5-6kb)  | 1       | 1352692   | 1361777   | -5090         | ENSG00000162576 | MXRA8        |
| NR4A1_R848   | chr1    | 1595196   | 1595724   | Promoter (4-5kb)  | 1       | 1598012   | 1600135   | 4411          | ENSG00000228594 | FNDC10       |
| NR4A1_R848   | chr1    | 1596009   | 1596409   | Promoter (3-4kb)  | 1       | 1598012   | 1600135   | 3726          | ENSG00000228594 | FNDC10       |
| NR4A1_R848   | chr1    | 3025962   | 3026386   | Promoter (4-5kb)  | 1       | 3021467   | 3022903   | 4495          | ENSG00000169717 | ACTRT2       |
| NR4A1_R848   | chr1    | 3051434   | 3051834   | Promoter (9-10kb) | 1       | 3059617   | 3061751   | 9917          | ENSG00000177133 | PRDM16-DT    |
| NR4A1_R848   | chr1    | 4647469   | 4647869   | Promoter (6-7kb)  | 1       | 4654609   | 4792534   | -6740         | ENSG00000196581 | AJAP1        |
| NR4A1_R848   | chr1    | 5868874   | 5869274   | Promoter (<=1kb)  | 1       | 5862811   | 5868375   | -499          | ENSG00000131697 | NPHP4        |
| NR4A1_R848   | chr1    | 6174592   | 6175227   | Promoter (4-5kb)  | 1       | 6105091   | 6180023   | 4796          | ENSG00000116254 | CHD5         |
| NR4A1_R848   | chr1    | 10661715  | 10662115  | Promoter (<=1kb)  | 1       | 10658007  | 10661398  | -317          | ENSG00000130940 | CASZ1        |
| NR4A1_R848   | chr1    | 11039571  | 11039971  | Promoter (3-4kb)  | 1       | 11037693  | 11043198  | 3227          | ENSG00000009724 | MASP2        |
| NR4A1_R848   | chr1    | 11041518  | 11041918  | Promoter (1-2kb)  | 1       | 11037693  | 11043198  | 1280          | ENSG00000009724 | MASP2        |
| NR4A1_R848   | chr1    | 16233597  | 16233997  | Promoter (2-3kb)  | 1       | 16232281  | 16236659  | 2662          | ENSG00000132881 | CPLANE2      |
| NR4A1_R848   | chr1    | 16606956  | 16607356  | Promoter (1-2kb)  | 1       | 16593562  | 16608650  | 1294          | ENSG00000219481 | NBPF1        |
| NR4A1_R848   | chr1    | 23625857  | 23626257  | Promoter (1-2kb)  | 1       | 23627334  | 23640568  | -1077         | ENSG00000197880 | MDS2         |
| NR4A1_R848   | chr1    | 25767161  | 25767561  | Promoter (4-5kb)  | 1       | 25772069  | 25782700  | -4508         | ENSG00000117643 | MAN1C1       |
| NR4A1_R848   | chr1    | 25768310  | 25768710  | Promoter (3-4kb)  | 1       | 25772069  | 25782700  | -3359         | ENSG00000117643 | MAN1C1       |
| NR4A1_R848   | chr1    | 27548799  | 27549199  | Promoter (4-5kb)  | 1       | 27552773  | 27553545  | 4346          | ENSG00000126705 | AHDC1        |
| NR4A1_R848   | chr1    | 31770929  | 31771329  | Promoter (6-7kb)  | 1       | 31741800  | 31764893  | -6036         | ENSG00000121753 | ADGRB2       |
| NR4A1_R848   | chr1    | 41489712  | 41490112  | Promoter (5-6kb)  | 1       | 41478775  | 41484683  | -5029         | ENSG00000127129 | EDN2         |
| NR4A1_R848   | chr1    | 43906048  | 43906448  | Promoter (6-7kb)  | 1       | 43899588  | 43930176  | 6460          | ENSG00000126091 | ST3GAL3      |
| NR4A1_R848   | chr1    | 52842950  | 52843350  | Promoter (<=1kb)  | 1       | 52842760  | 52894998  | 190           | ENSG00000203995 | ZYG11A       |
| NR4A1_R848   | chr1    | 53097612  | 53098012  | Promoter (6-7kb)  | 1       | 53087184  | 53090982  | -6630         | ENSG00000162383 | SLC1A7       |
| NR4A1_R848   | chr1    | 60598508  | 60598908  | Promoter (2-3kb)  | 1       | 60540250  | 60601677  | 2769          | ENSG00000226476 | LINC01748    |
| NR4A1_R848   | chr1    | 98205623  | 98206023  | Promoter (4-5kb)  | 1       | 98210747  | 98272658  | -4724         | ENSG00000226053 | LINC01776    |
| NR4A1_R848   | chr1    | 160194279 | 160194679 | Promoter (1-2kb)  | 1       | 160192638 | 160199053 | 1641          | ENSG00000143318 | CASQ1        |
| NR4A1_R848   | chr1    | 169621186 | 169621586 | Promoter (1-2kb)  | 1       | 169588849 | 169619219 | -1967         | ENSG00000174175 | SELP         |
| NR4A1_R848   | chr1    | 202136653 | 202137053 | Promoter (<=1kb)  | 1       | 202135202 | 202138034 | 981           | ENSG00000143862 | ARL8A        |
| NR4A1_R848   | chr1    | 202183967 | 202184367 | Promoter (<=1kb)  | 1       | 202183598 | 202189449 | 369           | ENSG00000243323 | PTPRVP       |
| NR4A1_R848   | chr1    | 202818015 | 202818415 | Promoter (1-2kb)  | 1       | 202820266 | 202827225 | -1851         | ENSG00000184774 | MGAT4EP      |
| NR4A1_R848   | chr1    | 203500310 | 203500710 | Promoter (4-5kb)  | 1       | 203495970 | 203499709 | 4340          | ENSG00000188770 | OPTC         |
| NR4A1_R848   | chr1    | 206762838 | 206763238 | Promoter (7-8kb)  | 1       | 206767602 | 206770575 | 7337          | ENSG00000136634 | IL10         |
| NR4A1_R848   | chr1    | 228071433 | 228071833 | Promoter (4-5kb)  | 1       | 228073909 | 228076550 | 4717          | ENSG00000276255 | LINC02809    |
| NR4A1_R848   | chr1    | 228622144 | 228622544 | Promoter (<=1kb)  | 1       | 228621447 | 228621565 | -579          | ENSG00000199352 | RNA551       |
| NR4A1_R848   | chr1    | 248752941 | 248753539 | Promoter (2-3kb)  | 1       | 248739415 | 248755759 | 2220          | ENSG00000259823 | LYPD8        |
| NR4A1_R848   | chr2    | 1155128   | 1155528   | Promoter (7-8kb)  | 2       | 1163247   | 1220057   | -7719         | ENSG00000172554 | SNTG2        |
| NR4A1_R848   | chr2    | 1866358   | 1867045   | Promoter (4-5kb)  | 2       | 1789241   | 1861677   | -4681         | ENSG00000186487 | MYT1L        |
| NR4A1_R848   | chr2    | 3527865   | 3528265   | Promoter (5-6kb)  | 2       | 3531990   | 3533370   | 5105          | ENSG00000171865 | RNASEH1      |
| NR4A1_R848   | chr2    | 10312494  | 10312894  | Promoter (8-9kb)  | 2       | 10303700  | 10427617  | 8794          | ENSG00000115756 | HPCAL1       |
| NR4A1_R848   | chr2    | 20229414  | 20229814  | Promoter (3-4kb)  | 2       | 20200799  | 20225433  | -3981         | ENSG00000115884 | SDC1         |
| NR4A1_R848   | chr2    | 25174297  | 25174697  | Promoter (5-6kb)  | 2       | 25160915  | 25168903  | -5394         | ENSG00000115138 | POMC         |
| NR4A1_R848   | chr2    | 26484820  | 26485220  | Promoter (6-7kb)  | 2       | 26457203  | 26478042  | -6778         | ENSG00000115155 | OTOF         |
| NR4A1_R848   | chr2    | 29005568  | 29005968  | Promoter (8-9kb)  | 2       | 29014467  | 29052230  | -8499         | ENSG00000189350 | TOGARAM2     |
| NR4A1_R848   | chr2    | 71618226  | 71618634  | Promoter (7-8kb)  | 2       | 71610779  | 71644033  | 7447          | ENSG00000135636 | DYSF         |
| NR4A1_R848   | chr2    | 84829308  | 84829708  | Promoter (5-6kb)  | 2       | 84821666  | 84835504  | 5796          | ENSG00000186854 | TRABD2A      |
| NR4A1_R848   | chr2    | 87824859  | 87825259  | Promoter (<=1kb)  | 2       | 87771406  | 87825767  | 508           | ENSG00000185304 | RGPD2        |
| NR4A1_R848   | chr2    | 100613733 | 100614133 | Promoter (6-7kb)  | 2       | 100607121 | 100611542 | 6612          | ENSG00000234988 | LINC01849    |
| NR4A1_R848   | chr2    | 110724920 | 110725369 | Promoter (7-8kb)  | 2       | 110732573 | 111094344 | -7204         | ENSG00000153093 | ACOXL        |
| NR4A1_R848   | chr2    | 113213021 | 113213421 | Promoter (1-2kb)  | 2       | 113211522 | 113239690 | 1499          | ENSG00000189223 | PAX8-AS1     |
| NR4A1_R848   | chr2    | 132266507 | 132266907 | Promoter (8-9kb)  | 2       | 132147591 | 132257969 | -8538         | ENSG00000163046 | ANKRD30BL    |
| NR4A1_R848   | chr2    | 217989820 | 217990220 | Promoter (<=1kb)  | 2       | 217799795 | 217991014 | 794           | ENSG00000079308 | TNS1         |
| NR4A1_R848   | chr2    | 231004909 | 231005309 | Promoter (2-3kb)  | 2       | 231002771 | 231025055 | 2138          | ENSG00000173699 | SPATA3       |
| NR4A1_R848   | chr2    | 232338766 | 232339166 | Promoter (2-3kb)  | 2       | 232335785 | 232336973 | 2981          | ENSG00000144535 | DIS3L2       |
| NR4A1_R848   | chr2    | 233014886 | 233015549 | Promoter (1-2kb)  | 2       | 232878701 | 233013256 | -1630         | ENSG00000066248 | NGEF         |
| NR4A1_R848   | chr2    | 236341443 | 236341843 | Promoter (4-5kb)  | 2       | 236324653 | 236346751 | 4908          | ENSG00000132321 | IQCA1        |
| NR4A1_R848   | chr2    | 237517415 | 237517815 | Promoter (<=1kb)  | 2       | 237518029 | 237553991 | -214          | ENSG00000115648 | MLPH         |
| NR4A1_R848   | chr2    | 238118329 | 238119063 | Promoter (8-9kb)  | 2       | 238127390 | 238133287 | -8327         | ENSG00000144488 | ESPNL        |
| NR4A1_R848   | chr2    | 238119310 | 238119710 | Promoter (7-8kb)  | 2       | 238127390 | 238133287 | -7680         | ENSG00000144488 | ESPNL        |
| NR4A1_R848   | chr2    | 238126898 | 238127298 | Promoter (<=1kb)  | 2       | 238127390 | 238133287 | -92           | ENSG00000144488 | ESPNL        |
| NR4A1_R848   | chr2    | 239116552 | 239116952 | Promoter (8-9kb)  | 2       | 239102609 | 239108104 | -8448         | ENSG00000068024 | HDAC4        |
| NR4A1_R848   | chr2    | 239345708 | 239346108 | Promoter (5-6kb)  | 2       | 239351724 | 239351804 | 5696          | ENSG00000264292 | MIR2467      |
| NR4A1_R848   | chr2    | 240527505 | 240527905 | Promoter (<=1kb)  | 2       | 240521939 | 240527881 | 0             | ENSG00000144504 | ANKMY1       |
| NR4A1_R848   | chr2    | 240950656 | 240951056 | Promoter (1-2kb)  | 2       | 240949655 | 240950929 | 1001          | ENSG00000226321 | CROCC2       |
| NR4A1_R848   | chr2    | 240961850 | 240962250 | Promoter (        |         |           |           |               |                 |              |

| Condition  | peakChr | peakStart | peakEnd   | annotation        | geneChr | geneStart | geneEnd   | distanceToTSS | geneID          | geneSymbol   |
|------------|---------|-----------|-----------|-------------------|---------|-----------|-----------|---------------|-----------------|--------------|
| NR4A1_R848 | chr3    | 129515989 | 129516389 | Promoter (3-4kb)  | 3       | 129512381 | 129514820 | 3608          | ENSG00000163913 | IFT122       |
| NR4A1_R848 | chr3    | 157071885 | 157072285 | Promoter (9-10kb) | 3       | 157081738 | 157088547 | -9453         | ENSG00000241544 | LINC02029    |
| NR4A1_R848 | chr3    | 197918081 | 197918481 | Promoter (1-2kb)  | 3       | 197913351 | 197916420 | -1661         | ENSG00000114473 | IQCG         |
| NR4A1_R848 | chr4    | 1324424   | 1324824   | Promoter (4-5kb)  | 4       | 1329057   | 1340113   | -4233         | ENSG00000090316 | MAEA         |
| NR4A1_R848 | chr4    | 2242871   | 2243271   | Promoter (<=1kb)  | 4       | 2078998   | 2242276   | -595          | ENSG00000130997 | POLN         |
| NR4A1_R848 | chr4    | 3468233   | 3468633   | Promoter (4-5kb)  | 4       | 3463311   | 3501473   | 4922          | ENSG00000175920 | DOK7         |
| NR4A1_R848 | chr4    | 6423416   | 6423816   | Promoter (2-3kb)  | 4       | 6323046   | 6421118   | -2298         | ENSG00000074211 | PPP2R2C      |
| NR4A1_R848 | chr4    | 6725578   | 6725978   | Promoter (9-10kb) | 4       | 6716174   | 6717664   | 9404          | ENSG00000186222 | BLOC1S4      |
| NR4A1_R848 | chr4    | 7190347   | 7190747   | Promoter (1-2kb)  | 4       | 7192538   | 7742827   | -1791         | ENSG00000184985 | SORCS2       |
| NR4A1_R848 | chr4    | 8012331   | 8012731   | Promoter (1-2kb)  | 4       | 8007385   | 8010728   | -1603         | ENSG00000163995 | ABLIM2       |
| NR4A1_R848 | chr4    | 8166210   | 8166610   | Promoter (7-8kb)  | 4       | 8106494   | 8158832   | -7378         | ENSG00000163995 | ABLIM2       |
| NR4A1_R848 | chr4    | 26492430  | 26492830  | Promoter (1-2kb)  | 4       | 26481396  | 26490484  | -1946         | ENSG00000163394 | CKAR         |
| NR4A1_R848 | chr4    | 101323886 | 101324286 | Promoter (6-7kb)  | 4       | 101330302 | 101330414 | 6128          | ENSG00000221265 | MIR1255A     |
| NR4A1_R848 | chr4    | 119406912 | 119407312 | Promoter (6-7kb)  | 4       | 119409892 | 119413366 | 6054          | NA              | LINC01061    |
| NR4A1_R848 | chr4    | 184220174 | 184220574 | Promoter (<=1kb)  | 4       | 184116863 | 184221230 | 656           | ENSG00000164303 | ENPP6        |
| NR4A1_R848 | chr4    | 186605175 | 186605575 | Promoter (3-4kb)  | 4       | 186600331 | 186601700 | -3475         | ENSG00000083857 | FAT1         |
| NR4A1_R848 | chr5    | 648286    | 648686    | Promoter (4-5kb)  | 5       | 644138    | 653243    | 4148          | ENSG00000112877 | CEP72        |
| NR4A1_R848 | chr5    | 1198747   | 1199293   | Promoter (2-3kb)  | 5       | 1201595   | 1223270   | -2302         | ENSG00000174358 | SLC6A19      |
| NR4A1_R848 | chr5    | 2762053   | 2762453   | Promoter (9-10kb) | 5       | 2752265   | 2755376   | 9788          | ENSG00000186493 | C5orf38      |
| NR4A1_R848 | chr5    | 3445771   | 3446171   | Promoter (6-7kb)  | 5       | 3452816   | 3461660   | -6645         | ENSG00000249830 | LINC02162    |
| NR4A1_R848 | chr5    | 3446300   | 3446732   | Promoter (6-7kb)  | 5       | 3452816   | 3461660   | -6084         | ENSG00000249830 | LINC02162    |
| NR4A1_R848 | chr5    | 6447443   | 6447843   | Promoter (1-2kb)  | 5       | 6448859   | 6496723   | -1016         | ENSG00000215218 | UBE2QL1      |
| NR4A1_R848 | chr5    | 14402691  | 14403242  | Promoter (2-3kb)  | 5       | 14406214  | 14419904  | -2972         | ENSG00000038382 | TRIO         |
| NR4A1_R848 | chr5    | 34191673  | 34192073  | Promoter (1-2kb)  | 5       | 34190056  | 34193653  | 1617          | NA              | LOC646652    |
| NR4A1_R848 | chr5    | 134459897 | 134460297 | Promoter (<=1kb)  | 5       | 134429051 | 134460615 | 318           | ENSG00000250564 | LOC102546229 |
| NR4A1_R848 | chr5    | 147872891 | 147873291 | Promoter (<=1kb)  | 5       | 147872018 | 147882191 | 873           | ENSG00000164265 | SCGB3A2      |
| NR4A1_R848 | chr5    | 149312698 | 149313098 | Promoter (2-3kb)  | 5       | 149315640 | 149341802 | -2542         | ENSG00000157510 | AFAP1L1      |
| NR4A1_R848 | chr5    | 168422953 | 168423353 | Promoter (5-6kb)  | 5       | 168428705 | 168454001 | -5352         | ENSG00000113645 | WWC1         |
| NR4A1_R848 | chr5    | 175881145 | 175881545 | Promoter (2-3kb)  | 5       | 175878206 | 175880053 | 2939          | ENSG00000145920 | CPLX2        |
| NR4A1_R848 | chr5    | 176133099 | 176133499 | Promoter (9-10kb) | 5       | 176123834 | 176125138 | 9265          | NA              | NA           |
| NR4A1_R848 | chr5    | 176800709 | 176801109 | Promoter (9-10kb) | 5       | 176810519 | 176880898 | -9410         | ENSG00000113763 | UNC5A        |
| NR4A1_R848 | chr6    | 34072843  | 34073243  | Promoter (9-10kb) | 6       | 34022138  | 34063635  | -9208         | ENSG00000124493 | GRM4         |
| NR4A1_R848 | chr6    | 35209069  | 35209469  | Promoter (4-5kb)  | 6       | 35213956  | 35253079  | -4487         | ENSG00000146197 | SCUBE3       |
| NR4A1_R848 | chr6    | 36409818  | 36410218  | Promoter (9-10kb) | 6       | 36391001  | 36400524  | -9294         | ENSG00000179165 | PXT1         |
| NR4A1_R848 | chr6    | 44009544  | 44009944  | Promoter (5-6kb)  | 6       | 43997182  | 44003649  | -5895         | ENSG00000237686 | LOC101929705 |
| NR4A1_R848 | chr6    | 160218858 | 160219258 | Promoter (<=1kb)  | 6       | 160217014 | 160218284 | -574          | ENSG00000112499 | SLC22A2      |
| NR4A1_R848 | chr6    | 160668824 | 160669224 | Promoter (4-5kb)  | 6       | 160531483 | 160664259 | -4565         | ENSG00000198670 | LPA          |
| NR4A1_R848 | chr6    | 167169278 | 167169855 | Promoter (<=1kb)  | 6       | 167170619 | 167182908 | -764          | NA              | TCP10L2      |
| NR4A1_R848 | chr6    | 167386889 | 167387289 | Promoter (2-3kb)  | 6       | 167377859 | 167384510 | -2379         | ENSG00000203690 | TCP10L3      |
| NR4A1_R848 | chr6    | 167789860 | 167790260 | Promoter (5-6kb)  | 6       | 167795530 | 167798248 | -5270         | ENSG00000269155 | LOC441179    |
| NR4A1_R848 | chr6    | 167977494 | 167977894 | Promoter (<=1kb)  | 6       | 167975924 | 167976939 | -555          | ENSG00000235994 | HGC6.3       |
| NR4A1_R848 | chr6    | 168659479 | 168659926 | Promoter (6-7kb)  | 6       | 168653203 | 168673445 | 6276          | ENSG00000112562 | SMOC2        |
| NR4A1_R848 | chr6    | 169233633 | 169234033 | Promoter (3-4kb)  | 6       | 169234510 | 169237412 | 3379          | ENSG00000186340 | THBS2        |
| NR4A1_R848 | chr7    | 566447    | 566872    | Promoter (4-5kb)  | 7       | 561958    | 565619    | 4489          | ENSG00000229380 | PRKAR1B-AS2  |
| NR4A1_R848 | chr7    | 1871603   | 1872003   | Promoter (<=1kb)  | 7       | 1815793   | 1872756   | 753           | ENSG00000002822 | MAD1L1       |
| NR4A1_R848 | chr7    | 2102168   | 2102568   | Promoter (5-6kb)  | 7       | 2014506   | 2107708   | 5140          | ENSG00000002822 | MAD1L1       |
| NR4A1_R848 | chr7    | 2850533   | 2850933   | Promoter (6-7kb)  | 7       | 2728105   | 2844308   | -6225         | ENSG00000146535 | GNA12        |
| NR4A1_R848 | chr7    | 4125047   | 4125447   | Promoter (4-5kb)  | 7       | 4129685   | 4269000   | -4238         | ENSG00000146555 | SDK1         |
| NR4A1_R848 | chr7    | 4807562   | 4807962   | Promoter (3-4kb)  | 7       | 4799105   | 4804068   | -3494         | ENSG00000157927 | RADIL        |
| NR4A1_R848 | chr7    | 6645629   | 6646029   | Promoter (3-4kb)  | 7       | 6641885   | 6644565   | 3744          | ENSG00000205903 | ZNF316       |
| NR4A1_R848 | chr7    | 24984603  | 24985003  | Promoter (2-3kb)  | 7       | 24871983  | 24981634  | -2969         | ENSG00000070882 | OSBPL3       |
| NR4A1_R848 | chr7    | 30694791  | 30695191  | Promoter (2-3kb)  | 7       | 30697985  | 30755970  | -2794         | ENSG00000241644 | INMT         |
| NR4A1_R848 | chr7    | 31077405  | 31077930  | Promoter (9-10kb) | 7       | 31086971  | 31104899  | -9041         | ENSG00000078549 | ADCYAP1R1    |
| NR4A1_R848 | chr7    | 36515602  | 36516002  | Promoter (<=1kb)  | 7       | 36513002  | 36514676  | -926          | ENSG00000136250 | AOAH         |
| NR4A1_R848 | chr7    | 45079922  | 45080322  | Promoter (1-2kb)  | 7       | 45080979  | 45081400  | 1078          | ENSG00000136274 | NACAD        |
| NR4A1_R848 | chr7    | 54545946  | 54546346  | Promoter (<=1kb)  | 7       | 54546161  | 54569489  | 0             | ENSG00000170419 | VSTM2A       |
| NR4A1_R848 | chr7    | 66099216  | 66099616  | Promoter (9-10kb) | 7       | 66089239  | 66092954  | 9977          | ENSG00000126522 | ASL          |
| NR4A1_R848 | chr7    | 73428126  | 73428526  | Promoter (5-6kb)  | 7       | 73433778  | 73436120  | -5252         | ENSG00000188763 | FZD9         |
| NR4A1_R848 | chr7    | 73592929  | 73593329  | Promoter (4-5kb)  | 7       | 73596174  | 73597362  | 4033          | ENSG00000009950 | MLXIPL       |
| NR4A1_R848 | chr7    | 75779719  | 75780119  | Promoter (7-8kb)  | 7       | 75769533  | 75772257  | -7462         | ENSG00000006606 | CCL26        |
| NR4A1_R848 | chr7    | 76208438  | 76208838  | Promoter (6-7kb)  | 7       | 76201896  | 76287287  | 6542          | ENSG00000177679 | SRRM3        |
| NR4A1_R848 | chr7    | 98242658  | 98243058  | Promoter (<=1kb)  | 7       | 98238504  | 98243574  | 516           | ENSG00000205356 | TECPR1       |
| NR4A1_R848 | chr7    | 100580564 | 100580964 | Promoter (<=1kb)  | 7       | 100574660 | 100580873 | 0             | ENSG00000077454 | LRCH4        |
| NR4A1_R848 | chr7    | 100958490 | 100958890 | Promoter (<=1kb)  | 7       | 100957965 | 100967890 | 525           | ENSG00000169894 | MUC3A        |
| NR4A1_R848 | chr7    | 128348957 | 128349357 | Promoter (5-6kb)  | 7       | 128338280 | 128343908 | -5049         | ENSG00000106344 | RBM28        |
| NR4A1_R848 | chr7    | 128887959 | 128888359 | Promoter (7-8kb)  | 7       | 128862451 | 128880923 | -7036         | ENSG00000135253 | KCP          |
| NR4A1_R848 | chr7    | 149804852 | 149805252 | Promoter (5-6kb)  | 7       | 149810915 | 149812635 | -5663         | ENSG00000197558 | SSPOP        |
| NR4A1_R848 | chr7    | 151197997 | 151198397 | Promoter (<=1kb)  | 7       | 151194256 | 151197302 | -695          | ENSG00000278685 | IQCA1L       |
| NR4A1_R848 | chr7    | 151276577 | 151276977 | Promoter (<=1kb)  | 7       | 151238976 | 151276734 | 0             | ENSG00000082014 | SMARCD3      |
| NR4A1_R848 | chr7    | 154883216 | 154883616 | Promoter (<=1kb)  | 7       | 154883568 | 154891230 | 0             | ENSG00000130226 | DPP6         |
| NR4A1_R848 | chr7    | 159106552 | 159106952 | Promoter (9-10kb) | 7       | 159030455 | 159097204 | -9348         | ENSG00000106018 | VIPR2        |
| NR4A1_R848 | chr8    | 20248760  | 20249160  | Promoter (6-7kb)  | 8       | 20249722  | 20255181  | 6021          | ENSG00000061337 | LZTS1        |
| NR4A1_R848 | chr8    | 33592294  | 33592694  | Promoter (5-6kb)  | 8       | 33593532  | 33597807  | 5113          | ENSG00000133878 | DUSP26       |
| NR4A1_R848 | chr8    | 37518226  | 37518626  | Promoter (<=1kb)  | 8       | 37516407  | 37517728  | -498          | ENSG00000253414 | LINC01605    |
| NR4A1_R848 | chr8    | 38156942  | 38157342  | Promoter (5-6kb)  | 8       | 38143652  | 38150992  | -5950         | ENSG00000147465 | STAR         |
| NR4A1_R848 | chr8    | 42451809  | 42452209  | Promoter (7-8kb)  | 8       | 42439467  | 42460168  | 7959          | ENSG00000168575 | SLC20A2      |
| NR4A1_R848 | chr8    | 48626279  | 48626679  | Promoter (5-6kb)  | 8       | 48620465  | 48623895  | 5814          | ENSG00000253455 | LOC101929217 |
| NR4A1_R848 | chr8    | 56310196  | 56310596  | Promoter (9-10kb) | 8       | 56300010  | 56320175  | 9579          | ENSG00000170786 | SDR16C5      |
| NR4A1_R848 | chr8    | 132187617 | 132188017 | Promoter (<=1kb)  | 8       | 132120859 | 132187213 | -404          | ENSG00000184156 | KCNQ3        |
| NR4A1_R848 | chr8    | 133194536 | 133194936 | Promoter (3-4kb)  | 8       | 133191137 | 133228064 | 3399          | ENSG00000104415 | CCN4         |
| NR4A1_R848 | chr8    | 139696577 | 139696977 | Promoter (5-6kb)  | 8       | 139600839 | 139702956 | 5979          | ENSG00000169427 | KCNK9        |
| NR4A1_R848 | chr8    | 139804015 | 139804415 | Promoter (1-2kb)  | 8       | 139731006 | 139806233 | 1818          | ENSG00000167632 | TRAPPC9      |
| NR4A1_R848 | chr8    | 140747651 | 140748051 | Promoter (<=1kb)  | 8       | 140744701 | 140747272 | -379          | ENSG00000169398 | PTK2         |
| NR4A1_R848 | chr8    | 142190983 | 142191400 | Promoter (6-7kb)  | 8       | 142198356 | 142209003 | -6956         | ENSG00000254008 | LINC00051    |
| NR4A1_R848 | chr8    | 142192584 | 142192984 | Promoter (5-6kb)  | 8       | 142198356 | 142209003 | -5372         | ENSG00000254008 | LINC00051    |
| NR4A1_R848 | chr8    | 142205153 | 142205553 | Promoter (6-7kb)  | 8       | 142198356 | 142209003 | 6797          | ENSG00000254008 | LINC00051    |
| NR4A1_R848 | chr8    | 142272019 | 142272637 | Promoter (7-8kb)  | 8       | 142271567 | 142279997 | 7360          | ENSG00000171045 | TSNARE1      |
| NR4A1_R848 | chr8    | 142469027 | 142469427 | Promoter (5-6kb)  | 8       | 142464016 | 142545006 | 5011          | ENSG00000181790 | ADGRB1       |
| NR4A1_R848 | chr8    | 142478601 | 142479001 | Promoter (<=1kb)  | 8       | 142479120 | 142540020 | -119          | ENSG00000181790 | ADGRB1       |
| NR4A1_R848 | chr8    | 142744578 | 142744978 | Promoter (2-3kb)  | 8       | 142740949 | 142742406 | -2172         | ENSG00000126233 | SLURP1       |
| NR4A1_R848 | chr8    | 142746585 | 142746985 | Promoter (4-5kb)  | 8       | 142740949 | 142742406 | -4179         | ENSG00000126233 | SLURP1       |
| NR4A1_R848 | chr8    | 142990057 | 142990470 | Promoter (5-6kb)  | 8       | 142995850 | 142996482 | -5380         | NA              | CDC42P3      |
| NR4A1_R848 | chr8    | 144021042 | 144021442 | Promoter (8-9kb)  | 8       | 143985891 | 144012772 | -8270         | ENSG00000178685 | PARP10       |
| NR4A1_R848 | chr9    | 41229643  |           |                   |         |           |           |               |                 |              |



| Condition  | peakChr | peakStart | peakEnd   | annotation        | geneChr | geneStart | geneEnd   | distanceToTSS | geneID          | geneSymbol   |
|------------|---------|-----------|-----------|-------------------|---------|-----------|-----------|---------------|-----------------|--------------|
| NR4A1_R848 | chr9    | 134285383 | 134285783 | Promoter (9–10kb) | 9       | 134293931 | 134295397 | 9614          | ENSG00000223729 | LINC02247    |
| NR4A1_R848 | chr9    | 135091333 | 135091733 | Promoter (3–4kb)  | 9       | 135095060 | 135119654 | -3327         | ENSG00000130558 | OLFM1        |
| NR4A1_R848 | chr9    | 135726876 | 135727276 | Promoter (9–10kb) | 9       | 135736517 | 135793618 | -9241         | ENSG00000107147 | KCNT1        |
| NR4A1_R848 | chr9    | 135774033 | 135774464 | Promoter (1–2kb)  | 9       | 135772858 | 135784858 | 1175          | ENSG00000107147 | KCNT1        |
| NR4A1_R848 | chr9    | 137355371 | 137355788 | Promoter (1–2kb)  | 9       | 137352633 | 137357297 | 1509          | ENSG00000187609 | EXD3         |
| NR4A1_R848 | chr9    | 137386827 | 137387227 | Promoter (8–9kb)  | 9       | 137353900 | 137395408 | 8181          | ENSG00000187609 | EXD3         |
| NR4A1_R848 | chr10   | 81117     | 81517     | Promoter (6–7kb)  | 10      | 46892     | 74163     | -6954         | ENSG00000261456 | TUBB8        |
| NR4A1_R848 | chr10   | 1209499   | 1209899   | Promoter (9–10kb) | 10      | 1183151   | 1200385   | -9114         | ENSG00000185736 | ADARB2       |
| NR4A1_R848 | chr10   | 5370719   | 5371119   | Promoter (5–6kb)  | 10      | 5364966   | 5374692   | 5753          | ENSG00000178473 | UCN3         |
| NR4A1_R848 | chr10   | 5497361   | 5497761   | Promoter (1–2kb)  | 10      | 5498697   | 5499570   | 1809          | ENSG00000178372 | CALML5       |
| NR4A1_R848 | chr10   | 5528360   | 5528760   | Promoter (2–3kb)  | 10      | 5517281   | 5526246   | -2114         | NA              | CALML3-AS1   |
| NR4A1_R848 | chr10   | 27753090  | 27753490  | Promoter (7–8kb)  | 10      | 27672875  | 27746060  | -7030         | ENSG00000150051 | MKX          |
| NR4A1_R848 | chr10   | 27770203  | 27770603  | Promoter (8–9kb)  | 10      | 27761589  | 27767793  | 8614          | NA              | MKX-AS1      |
| NR4A1_R848 | chr10   | 29695685  | 29696085  | Promoter (9–10kb) | 10      | 29657870  | 29686640  | -9045         | ENSG00000197321 | SVIL         |
| NR4A1_R848 | chr10   | 46268233  | 46268633  | Promoter (4–5kb)  | 10      | 46233885  | 46273557  | 4924          | NA              | ANTXRLP1     |
| NR4A1_R848 | chr10   | 46298153  | 46298553  | Promoter (<=1kb)  | 10      | 46297404  | 46310499  | 749           | ENSG00000274209 | ANTXRL       |
| NR4A1_R848 | chr10   | 47323140  | 47323540  | Promoter (<=1kb)  | 10      | 47322454  | 47327588  | 686           | ENSG00000263761 | GDF2         |
| NR4A1_R848 | chr10   | 49624863  | 49625263  | Promoter (9–10kb) | 10      | 49615757  | 49619856  | 9106          | ENSG00000070748 | CHAT         |
| NR4A1_R848 | chr10   | 49742253  | 49742653  | Promoter (2–3kb)  | 10      | 49743571  | 49745357  | 2704          | ENSG00000197444 | OGDHL        |
| NR4A1_R848 | chr10   | 71432166  | 71432566  | Promoter (7–8kb)  | 10      | 71439832  | 71717907  | -7266         | ENSG00000107736 | CDH23        |
| NR4A1_R848 | chr10   | 73755132  | 73755532  | Promoter (4–5kb)  | 10      | 73760110  | 73763555  | -4578         | ENSG00000176986 | SEC24C       |
| NR4A1_R848 | chr10   | 80539332  | 80539732  | Promoter (<=1kb)  | 10      | 80538332  | 80644085  | 1000          | ENSG00000178217 | SH2D4B       |
| NR4A1_R848 | chr10   | 80656068  | 80656468  | Promoter (6–7kb)  | 10      | 80649797  | 80653732  | 6271          | ENSG00000231082 | LINC02655    |
| NR4A1_R848 | chr10   | 84186866  | 84187266  | Promoter (7–8kb)  | 10      | 84194537  | 84218694  | -7271         | ENSG00000148600 | CDHR1        |
| NR4A1_R848 | chr10   | 103250849 | 103251249 | Promoter (4–5kb)  | 10      | 103245887 | 103248016 | 4962          | ENSG00000235376 | RPEL1        |
| NR4A1_R848 | chr10   | 116613089 | 116613489 | Promoter (7–8kb)  | 10      | 116620953 | 116645143 | -7464         | ENSG00000266200 | PNLIPRP2     |
| NR4A1_R848 | chr10   | 122724642 | 122725042 | Promoter (4–5kb)  | 10      | 122729429 | 122826448 | -4387         | ENSG00000176584 | DMBT1L1      |
| NR4A1_R848 | chr10   | 132364268 | 132364668 | Promoter (<=1kb)  | 10      | 132365471 | 132367001 | -803          | ENSG00000148814 | LRRC27       |
| NR4A1_R848 | chr10   | 132392393 | 132392793 | Promoter (4–5kb)  | 10      | 132397168 | 132417528 | -4375         | ENSG00000171813 | PWWP2B       |
| NR4A1_R848 | chr10   | 132703652 | 132704052 | Promoter (6–7kb)  | 10      | 132710348 | 132753972 | -6296         | ENSG00000068383 | INPP5A       |
| NR4A1_R848 | chr10   | 132775009 | 132775409 | Promoter (9–10kb) | 10      | 132765824 | 132782405 | 9185          | ENSG00000068383 | INPP5A       |
| NR4A1_R848 | chr10   | 132821839 | 132822239 | Promoter (9–10kb) | 10      | 132808443 | 132812804 | -9035         | ENSG00000171811 | CFAP46       |
| NR4A1_R848 | chr10   | 132843097 | 132843497 | Promoter (6–7kb)  | 10      | 132834682 | 132837077 | -6020         | ENSG00000171811 | CFAP46       |
| NR4A1_R848 | chr10   | 133065756 | 133066156 | Promoter (4–5kb)  | 10      | 133070929 | 133131675 | -4773         | ENSG00000197177 | ADGRA1       |
| NR4A1_R848 | chr10   | 133250356 | 133250797 | Promoter (2–3kb)  | 10      | 133246478 | 133247891 | -2465         | ENSG00000166917 | MIR202HG     |
| NR4A1_R848 | chr10   | 133338540 | 133338940 | Promoter (1–2kb)  | 10      | 133325932 | 133336935 | -1605         | ENSG00000130643 | CALY         |
| NR4A1_R848 | chr11   | 359862    | 360262    | Promoter (9–10kb) | 11      | 369499    | 382117    | -9237         | ENSG00000182272 | B4GALNT4     |
| NR4A1_R848 | chr11   | 414149    | 414549    | Promoter (<=1kb)  | 11      | 407315    | 414923    | 374           | ENSG00000185187 | SIGIRR       |
| NR4A1_R848 | chr11   | 814290    | 814690    | Promoter (2–3kb)  | 11      | 812079    | 812850    | 2211          | ENSG00000177600 | RPLP2        |
| NR4A1_R848 | chr11   | 893752    | 894152    | Promoter (8–9kb)  | 11      | 882328    | 902322    | 8170          | ENSG00000177830 | CHID1        |
| NR4A1_R848 | chr11   | 1242819   | 1243219   | Promoter (6–7kb)  | 11      | 1242261   | 1249676   | 6457          | ENSG00000255177 | MUC5B-AS1    |
| NR4A1_R848 | chr11   | 2131547   | 2131947   | Promoter (2–3kb)  | 11      | 2134134   | 2134209   | 2262          | ENSG00000207805 | MIR483       |
| NR4A1_R848 | chr11   | 3131467   | 3131867   | Promoter (2–3kb)  | 11      | 3122026   | 3129329   | -2138         | ENSG00000021762 | OSBPL5       |
| NR4A1_R848 | chr11   | 3173766   | 3174166   | Promoter (7–8kb)  | 11      | 3093385   | 3166739   | -7027         | ENSG00000021762 | OSBPL5       |
| NR4A1_R848 | chr11   | 3174301   | 3174701   | Promoter (7–8kb)  | 11      | 3093385   | 3166739   | -7562         | ENSG00000021762 | OSBPL5       |
| NR4A1_R848 | chr11   | 17559993  | 17560393  | Promoter (4–5kb)  | 11      | 17555700  | 17558602  | 4293          | ENSG00000188162 | OTOG         |
| NR4A1_R848 | chr11   | 44942144  | 44942544  | Promoter (<=1kb)  | 11      | 44936843  | 44943191  | 647           | ENSG00000175274 | TP53I1       |
| NR4A1_R848 | chr11   | 45094526  | 45094926  | Promoter (<=1kb)  | 11      | 45095806  | 45224908  | -880          | ENSG00000019485 | PRDM11       |
| NR4A1_R848 | chr11   | 47324570  | 47324970  | Promoter (<=1kb)  | 11      | 47324304  | 47325300  | 266           | ENSG00000110514 | MADD         |
| NR4A1_R848 | chr11   | 61391202  | 61391602  | Promoter (<=1kb)  | 11      | 61392360  | 61398863  | -758          | ENSG00000187049 | TMEM216      |
| NR4A1_R848 | chr11   | 61673750  | 61674150  | Promoter (6–7kb)  | 11      | 61680391  | 61747001  | -6241         | ENSG00000134780 | DAGLA        |
| NR4A1_R848 | chr11   | 62894568  | 62894968  | Promoter (6–7kb)  | 11      | 62887870  | 62888520  | 6698          | ENSG00000168003 | SLC3A2       |
| NR4A1_R848 | chr11   | 64273939  | 64274339  | Promoter (1–2kb)  | 11      | 64270308  | 64272856  | -1083         | ENSG00000002330 | BAD          |
| NR4A1_R848 | chr11   | 65833964  | 65834364  | Promoter (<=1kb)  | 11      | 65833967  | 65850563  | 0             | ENSG00000172803 | SNX32        |
| NR4A1_R848 | chr11   | 66292828  | 66293228  | Promoter (<=1kb)  | 11      | 66291894  | 66296664  | 934           | ENSG00000179292 | TMEM151A     |
| NR4A1_R848 | chr11   | 66341605  | 66342005  | Promoter (<=1kb)  | 11      | 66337339  | 66342121  | 116           | ENSG00000174744 | BRMS1        |
| NR4A1_R848 | chr11   | 67669174  | 67669574  | Promoter (1–2kb)  | 11      | 67666157  | 67667970  | -1204         | ENSG00000132746 | ALDH3B2      |
| NR4A1_R848 | chr11   | 69291303  | 69291703  | Promoter (2–3kb)  | 11      | 69294151  | 69341682  | -2448         | ENSG00000172927 | MYEOV        |
| NR4A1_R848 | chr11   | 70702179  | 70702579  | Promoter (3–4kb)  | 11      | 70492432  | 70698769  | -3410         | ENSG00000162105 | SHANK2       |
| NR4A1_R848 | chr11   | 70856033  | 70856433  | Promoter (6–7kb)  | 11      | 70862790  | 70865115  | -6357         | ENSG00000171671 | SHANK2-AS3   |
| NR4A1_R848 | chr11   | 71440470  | 71440870  | Promoter (<=1kb)  | 11      | 71438749  | 71441347  | 477           | ENSG00000172893 | DHCR7        |
| NR4A1_R848 | chr11   | 77068949  | 77069349  | Promoter (1–2kb)  | 11      | 77066993  | 77124495  | 1956          | ENSG00000149260 | CAPN5        |
| NR4A1_R848 | chr11   | 96091973  | 96092373  | Promoter (1–2kb)  | 11      | 95978755  | 96093520  | 1147          | ENSG00000184384 | MAML2        |
| NR4A1_R848 | chr11   | 107018687 | 107019087 | Promoter (<=1kb)  | 11      | 106674012 | 107018524 | -163          | ENSG00000152402 | GUCY1A2      |
| NR4A1_R848 | chr11   | 107856855 | 107857255 | Promoter (1–2kb)  | 11      | 107792615 | 107858561 | 1306          | ENSG00000110660 | SLC35F2      |
| NR4A1_R848 | chr11   | 112254886 | 112255286 | Promoter (4–5kb)  | 11      | 112260265 | 112261396 | -4979         | ENSG00000268472 | LOC100132686 |
| NR4A1_R848 | chr11   | 113475947 | 113476347 | Promoter (<=1kb)  | 11      | 113413864 | 113475691 | -256          | ENSG00000149295 | DRD2         |
| NR4A1_R848 | chr11   | 133901818 | 133902218 | Promoter (3–4kb)  | 11      | 133898504 | 133898581 | -3237         | ENSG00000284020 | MIR4697      |
| NR4A1_R848 | chr11   | 133932767 | 133933167 | Promoter (4–5kb)  | 11      | 133922576 | 133938100 | 4933          | ENSG00000080854 | IGSF9B       |
| NR4A1_R848 | chr12   | 6369579   | 6369979   | Promoter (4–5kb)  | 12      | 6347509   | 6374803   | 4824          | ENSG00000111319 | SCNN1A       |
| NR4A1_R848 | chr12   | 52063022  | 52063422  | Promoter (5–6kb)  | 12      | 52069246  | 52070415  | -5824         | ENSG00000123395 | ATG101       |
| NR4A1_R848 | chr12   | 57191671  | 57192071  | Promoter (2–3kb)  | 12      | 57194504  | 57194576  | -2433         | ENSG00000221365 | MIR1228      |
| NR4A1_R848 | chr12   | 97989199  | 97989774  | Promoter (5–6kb)  | 12      | 97995383  | 97995448  | 5674          | ENSG00000263890 | MIR4303      |
| NR4A1_R848 | chr12   | 108341951 | 108342351 | Promoter (2–3kb)  | 12      | 108288044 | 108339317 | -2634         | ENSG00000174600 | CMKLR1       |
| NR4A1_R848 | chr12   | 109809263 | 109809663 | Promoter (5–6kb)  | 12      | 109783621 | 109814796 | 5133          | ENSG00000111199 | TRPV4        |
| NR4A1_R848 | chr12   | 111372481 | 111372881 | Promoter (3–4kb)  | 12      | 111360651 | 111369121 | -3360         | ENSG00000198324 | PHETA1       |
| NR4A1_R848 | chr12   | 112574580 | 112574980 | Promoter (<=1kb)  | 12      | 112575027 | 112865465 | -47           | ENSG00000089169 | RPH3A        |
| NR4A1_R848 | chr12   | 117322195 | 117322595 | Promoter (8–9kb)  | 12      | 117215259 | 117331074 | 8479          | ENSG00000089250 | NOS1         |
| NR4A1_R848 | chr12   | 119129978 | 119130378 | Promoter (<=1kb)  | 12      | 119130678 | 119151220 | -300          | ENSG00000139767 | SRRM4        |
| NR4A1_R848 | chr12   | 120306447 | 120306847 | Promoter (2–3kb)  | 12      | 120303880 | 120313241 | 2567          | ENSG00000089163 | SIRT4        |
| NR4A1_R848 | chr12   | 120994669 | 120995069 | Promoter (1–2kb)  | 12      | 120996390 | 120997882 | -1321         | ENSG00000135100 | HNF1A        |
| NR4A1_R848 | chr12   | 123512299 | 123512699 | Promoter (1–2kb)  | 12      | 123472068 | 123514428 | 1729          | ENSG00000188026 | RILPL1       |
| NR4A1_R848 | chr12   | 124431643 | 124432043 | Promoter (1–2kb)  | 12      | 124429395 | 124430641 | -1002         | ENSG00000196498 | NCOR2        |
| NR4A1_R848 | chr12   | 125090124 | 125090524 | Promoter (<=1kb)  | 12      | 125091013 | 125107154 | -489          | ENSG00000081760 | AACS         |
| NR4A1_R848 | chr12   | 131856560 | 131856960 | Promoter (6–7kb)  | 12      | 131849835 | 131851332 | 6725          | ENSG00000198598 | MMP17        |
| NR4A1_R848 | chr13   | 19118875  | 19119275  | Promoter (<=1kb)  | 13      | 19074038  | 19118315  | -560          | ENSG00000287861 | LOC107984132 |
| NR4A1_R848 | chr13   | 27996193  | 27996593  | Promoter (7–8kb)  | 13      | 27977717  | 27988693  | -7500         | ENSG00000183463 | URAD         |
| NR4A1_R848 | chr13   | 29491503  | 29491903  | Promoter (1–2kb)  | 13      | 29476515  | 29490105  | -1398         | NA              | MTUS2-AS1    |
| NR4A1_R848 | chr13   | 110043236 | 110043636 | Promoter (9–10kb) | 13      | 110053285 | 110054952 | -9649         | ENSG00000231428 | LINC00396    |
| NR4A1_R848 | chr13   | 111590288 | 111590731 | Promoter (5–6kb)  | 13      | 111596009 | 111642079 | -5278         | ENSG00000215881 | LINC02337    |
| NR4A1_R848 | chr13   | 113796056 | 113796456 | Promoter (3–4kb)  | 13      | 113799888 | 113804890 | -3432         | ENSG00000184497 | TMEM255B     |
| NR4A1_R848 | chr13   | 113798294 | 113798694 | Promoter (1–2kb)  | 13      | 113799888 | 113804890 | -1194         | ENSG00000184497 | TMEM255B     |

| Condition  | peakChr | peakStart | peakEnd  | annotation        | geneChr | geneStart | geneEnd  | distanceToTSS | geneID          | geneSymbol   |
|------------|---------|-----------|----------|-------------------|---------|-----------|----------|---------------|-----------------|--------------|
| NR4A1_R848 | chr15   | 79439045  | 79439450 | Promoter (6-7kb)  | 15      | 79432516  | 79472290 | 6529          | ENSG00000169330 | MINAR1       |
| NR4A1_R848 | chr15   | 80444949  | 80445349 | Promoter (3-4kb)  | 15      | 80441240  | 80552753 | 3709          | ENSG00000172379 | ARNT2        |
| NR4A1_R848 | chr15   | 88900814  | 88901214 | Promoter (<=1kb)  | 15      | 88899298  | 88901960 | 746           | ENSG00000140545 | MFGE8        |
| NR4A1_R848 | chr15   | 89746228  | 89746628 | Promoter (4-5kb)  | 15      | 89749891  | 89751137 | 4509          | ENSG00000166823 | MESP1        |
| NR4A1_R848 | chr16   | 977795    | 978195   | Promoter (1-2kb)  | 16      | 976084    | 979648   | 1453          | ENSG00000103227 | LMF1         |
| NR4A1_R848 | chr16   | 1185555   | 1185955  | Promoter (9-10kb) | 16      | 1195029   | 1198934  | -9074         | ENSG00000196557 | CACNA1H      |
| NR4A1_R848 | chr16   | 1635888   | 1636288  | Promoter (3-4kb)  | 16      | 1632259   | 1686715  | 3629          | ENSG00000007545 | CRAMP1       |
| NR4A1_R848 | chr16   | 8591223   | 8591629  | Promoter (1-2kb)  | 16      | 8569500   | 8590193  | -1030         | ENSG00000232258 | TMEM114      |
| NR4A1_R848 | chr16   | 10859261  | 10859661 | Promoter (6-7kb)  | 16      | 10866222  | 10902104 | -6561         | ENSG00000179583 | CIITA        |
| NR4A1_R848 | chr16   | 27306237  | 27306637 | Promoter (7-8kb)  | 16      | 27313668  | 27345020 | -7031         | ENSG00000077238 | IL4R         |
| NR4A1_R848 | chr16   | 29445725  | 29446125 | Promoter (<=1kb)  | 16      | 29425800  | 29447026 | 901           | ENSG00000254634 | SMG1P6       |
| NR4A1_R848 | chr16   | 33337593  | 33338337 | Promoter (7-8kb)  | 16      | 33206431  | 33330342 | -7251         | NA              | LOC105369266 |
| NR4A1_R848 | chr16   | 33338591  | 33338991 | Promoter (8-9kb)  | 16      | 33206431  | 33330342 | -8249         | NA              | LOC105369266 |
| NR4A1_R848 | chr16   | 33339643  | 33340043 | Promoter (9-10kb) | 16      | 33206431  | 33330342 | -9301         | NA              | LOC105369266 |
| NR4A1_R848 | chr16   | 46729907  | 46730307 | Promoter (<=1kb)  | 16      | 46727238  | 46729937 | 0             | ENSG00000140795 | MYLK3        |
| NR4A1_R848 | chr16   | 57568874  | 57569274 | Promoter (5-6kb)  | 16      | 57574816  | 57591681 | -5542         | ENSG00000159618 | ADGRG5       |
| NR4A1_R848 | chr16   | 66380122  | 66380522 | Promoter (<=1kb)  | 16      | 66379225  | 66392985 | 897           | ENSG00000179776 | CDH5         |
| NR4A1_R848 | chr16   | 68243720  | 68244120 | Promoter (1-2kb)  | 16      | 68245304  | 68259923 | -1184         | ENSG00000103066 | PLA2G15      |
| NR4A1_R848 | chr16   | 70644789  | 70645189 | Promoter (1-2kb)  | 16      | 70646563  | 70656671 | -1374         | ENSG00000157368 | IL34         |
| NR4A1_R848 | chr16   | 71898316  | 71898716 | Promoter (2-3kb)  | 16      | 71895589  | 71921400 | 2727          | ENSG00000182149 | IST1         |
| NR4A1_R848 | chr16   | 83921369  | 83921769 | Promoter (9-10kb) | 16      | 83931311  | 83957650 | -9542         | ENSG00000140961 | OSGIN1       |
| NR4A1_R848 | chr16   | 84125155  | 84125555 | Promoter (8-9kb)  | 16      | 84053763  | 84116942 | -8213         | ENSG00000140943 | MBTPS1       |
| NR4A1_R848 | chr16   | 85755574  | 85755974 | Promoter (4-5kb)  | 16      | 85690170  | 85751129 | -4445         | ENSG00000154102 | C16orf74     |
| NR4A1_R848 | chr16   | 86587401  | 86587801 | Promoter (8-9kb)  | 16      | 86578506  | 86582160 | 8895          | ENSG00000176678 | FOXL1        |
| NR4A1_R848 | chr16   | 87700505  | 87700905 | Promoter (7-8kb)  | 16      | 87703026  | 87708387 | 7482          | ENSG00000104731 | KLHDC4       |
| NR4A1_R848 | chr16   | 88192887  | 88193325 | Promoter (<=1kb)  | 16      | 88194281  | 88195217 | -956          | ENSG00000260420 | LINC02182    |
| NR4A1_R848 | chr16   | 88979981  | 88980381 | Promoter (2-3kb)  | 16      | 88874858  | 88977207 | -2774         | ENSG00000129993 | CBFA2T3      |
| NR4A1_R848 | chr16   | 89908083  | 89908857 | Promoter (<=1kb)  | 16      | 89908966  | 89911379 | -109          | ENSG00000141002 | TCF25        |
| NR4A1_R848 | chr17   | 4450580   | 4450980  | Promoter (3-4kb)  | 17      | 4446604   | 4448291  | 3976          | ENSG00000182557 | SPNS3        |
| NR4A1_R848 | chr17   | 4908772   | 4909172  | Promoter (5-6kb)  | 17      | 4897771   | 4903098  | -5674         | ENSG00000108556 | CHRNE        |
| NR4A1_R848 | chr17   | 5502833   | 5503233  | Promoter (<=1kb)  | 17      | 5499428   | 5502963  | 0             | ENSG00000286190 | LOC728392    |
| NR4A1_R848 | chr17   | 15465112  | 15465512 | Promoter (2-3kb)  | 17      | 15436015  | 15467621 | 2109          | ENSG00000239704 | CDRT4        |
| NR4A1_R848 | chr17   | 16456200  | 16456600 | Promoter (7-8kb)  | 17      | 16441577  | 16448294 | -7906         | ENSG00000181350 | LRRC75A      |
| NR4A1_R848 | chr17   | 16457807  | 16458207 | Promoter (9-10kb) | 17      | 16441577  | 16448294 | -9513         | ENSG00000181350 | LRRC75A      |
| NR4A1_R848 | chr17   | 18125354  | 18125754 | Promoter (2-3kb)  | 17      | 18123113  | 18124565 | 2241          | ENSG00000091536 | MYO15A       |
| NR4A1_R848 | chr17   | 22401314  | 22401714 | Promoter (4-5kb)  | 17      | 22406019  | 22413744 | -4305         | ENSG00000276399 | FLJ36000     |
| NR4A1_R848 | chr17   | 22521263  | 22521712 | Promoter (1-2kb)  | 17      | 22523111  | 22524663 | -1399         | ENSG00000256618 | MTRNR2L1     |
| NR4A1_R848 | chr17   | 34186445  | 34186845 | Promoter (2-3kb)  | 17      | 34169372  | 34183632 | -2813         | ENSG00000261156 | LINC01989    |
| NR4A1_R848 | chr17   | 40087046  | 40087446 | Promoter (2-3kb)  | 17      | 40084434  | 40087001 | 2612          | ENSG00000126351 | THRA         |
| NR4A1_R848 | chr17   | 63781608  | 63782008 | Promoter (5-6kb)  | 17      | 63787036  | 63798196 | -5028         | ENSG00000198231 | DDX42        |
| NR4A1_R848 | chr17   | 73758628  | 73759028 | Promoter (1-2kb)  | 17      | 73749270  | 73760961 | 1933          | NA              | LINC00469    |
| NR4A1_R848 | chr17   | 76840752  | 76841152 | Promoter (8-9kb)  | 17      | 76849840  | 76861836 | -8688         | ENSG00000267535 | LINC00868    |
| NR4A1_R848 | chr17   | 77469989  | 77470389 | Promoter (3-4kb)  | 17      | 77466403  | 77490859 | 3586          | ENSG00000184640 | SEPTIN9      |
| NR4A1_R848 | chr17   | 77484844  | 77485244 | Promoter (2-3kb)  | 17      | 77481913  | 77488788 | 2931          | ENSG00000184640 | SEPTIN9      |
| NR4A1_R848 | chr17   | 77509638  | 77510038 | Promoter (6-7kb)  | 17      | 77516887  | 77536592 | -6849         | ENSG00000267665 | LOC400622    |
| NR4A1_R848 | chr17   | 78115693  | 78116093 | Promoter (1-2kb)  | 17      | 78112922  | 78113959 | -1734         | ENSG00000141522 | TMC6         |
| NR4A1_R848 | chr17   | 78477776  | 78478176 | Promoter (5-6kb)  | 17      | 78423697  | 78472774 | -5002         | ENSG00000187775 | DNAH17       |
| NR4A1_R848 | chr17   | 80487719  | 80488119 | Promoter (9-10kb) | 17      | 80473414  | 80477843 | -9876         | ENSG00000171246 | NPTX1        |
| NR4A1_R848 | chr17   | 80930231  | 80930631 | Promoter (7-8kb)  | 17      | 80922724  | 80924172 | 7507          | ENSG00000141564 | RPTOR        |
| NR4A1_R848 | chr17   | 81249239  | 81249639 | Promoter (1-2kb)  | 17      | 81245004  | 81247635 | -1604         | ENSG00000157637 | SLC38A10     |
| NR4A1_R848 | chr17   | 81531198  | 81531672 | Promoter (2-3kb)  | 17      | 81528532  | 81537080 | 2666          | ENSG00000186765 | FSCN2        |
| NR4A1_R848 | chr17   | 81531869  | 81532269 | Promoter (3-4kb)  | 17      | 81528532  | 81537080 | 3337          | ENSG00000186765 | FSCN2        |
| NR4A1_R848 | chr17   | 82586205  | 82586640 | Promoter (<=1kb)  | 17      | 82586130  | 82587562 | 75            | ENSG00000141568 | FO XK2       |
| NR4A1_R848 | chr17   | 82663950  | 82664350 | Promoter (<=1kb)  | 17      | 82657793  | 82664895 | 545           | ENSG00000141542 | RAB40B       |
| NR4A1_R848 | chr18   | 107975    | 108387   | Promoter (<=1kb)  | 18      | 109065    | 122219   | -678          | ENSG00000263006 | ROCK1P1      |
| NR4A1_R848 | chr18   | 110198    | 110598   | Promoter (1-2kb)  | 18      | 109065    | 122219   | 1133          | ENSG00000263006 | ROCK1P1      |
| NR4A1_R848 | chr18   | 10756550  | 10756950 | Promoter (2-3kb)  | 18      | 10759584  | 10759649 | 2699          | ENSG00000274838 | MIR6788      |
| NR4A1_R848 | chr18   | 10757057  | 10757457 | Promoter (2-3kb)  | 18      | 10759584  | 10759649 | 2192          | ENSG00000274838 | MIR6788      |
| NR4A1_R848 | chr18   | 13822920  | 13823320 | Promoter (<=1kb)  | 18      | 13824149  | 13827323 | -829          | ENSG00000176136 | MC5R         |
| NR4A1_R848 | chr18   | 14172482  | 14172882 | Promoter (6-7kb)  | 18      | 14179097  | 14185401 | -6215         | NA              | ANKRD20A5P   |
| NR4A1_R848 | chr18   | 45824862  | 45825262 | Promoter (<=1kb)  | 18      | 45825675  | 45844094 | -413          | ENSG00000197046 | SIGLEC15     |
| NR4A1_R848 | chr18   | 77259508  | 77259908 | Promoter (5-6kb)  | 18      | 77253740  | 77256217 | 5768          | ENSG00000166573 | GALR1        |
| NR4A1_R848 | chr18   | 79865279  | 79865679 | Promoter (1-2kb)  | 18      | 79863668  | 79899816 | 1611          | ENSG00000178342 | KCNG2        |
| NR4A1_R848 | chr19   | 309804    | 310204   | Promoter (<=1kb)  | 19      | 305573    | 308923   | -881          | ENSG00000105556 | MIER2        |
| NR4A1_R848 | chr19   | 442140    | 442771   | Promoter (2-3kb)  | 19      | 435779    | 439267   | -2873         | ENSG00000129946 | SHC2         |
| NR4A1_R848 | chr19   | 443544    | 444298   | Promoter (4-5kb)  | 19      | 435779    | 439267   | -4277         | ENSG00000129946 | SHC2         |
| NR4A1_R848 | chr19   | 464955    | 465355   | Promoter (3-4kb)  | 19      | 416583    | 460996   | -3959         | ENSG00000129946 | SHC2         |
| NR4A1_R848 | chr19   | 466897    | 467297   | Promoter (5-6kb)  | 19      | 464167    | 472615   | 5318          | ENSG00000181781 | ODF3L2       |
| NR4A1_R848 | chr19   | 816108    | 816508   | Promoter (1-2kb)  | 19      | 813756    | 814911   | -1197         | ENSG00000129951 | PLPPR3       |
| NR4A1_R848 | chr19   | 1282470   | 1282870  | Promoter (3-4kb)  | 19      | 1285873   | 1301431  | -3003         | ENSG00000099617 | EFNA2        |
| NR4A1_R848 | chr19   | 2357496   | 2357896  | Promoter (2-3kb)  | 19      | 2360238   | 2426239  | -2342         | ENSG00000178297 | TMPRSS9      |
| NR4A1_R848 | chr19   | 3235443   | 3235843  | Promoter (9-10kb) | 19      | 3225485   | 3297016  | 9958          | ENSG00000161082 | CELLF5       |
| NR4A1_R848 | chr19   | 3476827   | 3477227  | Promoter (1-2kb)  | 19      | 3474407   | 3478488  | 1261          | ENSG00000095932 | SMIM24       |
| NR4A1_R848 | chr19   | 3529041   | 3529441  | Promoter (2-3kb)  | 19      | 3526100   | 3531766  | 2941          | ENSG00000105325 | FZR1         |
| NR4A1_R848 | chr19   | 3776561   | 3776961  | Promoter (4-5kb)  | 19      | 3769089   | 3772221  | -4340         | ENSG00000173976 | RAX2         |
| NR4A1_R848 | chr19   | 3938437   | 3938837  | Promoter (1-2kb)  | 19      | 3936622   | 3942174  | 1815          | ENSG00000077009 | NMRK2        |
| NR4A1_R848 | chr19   | 4553211   | 4553611  | Promoter (4-5kb)  | 19      | 4542914   | 4558457  | 4846          | ENSG00000167680 | SEMA6B       |
| NR4A1_R848 | chr19   | 5019564   | 5019964  | Promoter (3-4kb)  | 19      | 5016325   | 5153105  | 3239          | ENSG00000127663 | KDM4B        |
| NR4A1_R848 | chr19   | 5673868   | 5674268  | Promoter (<=1kb)  | 19      | 5674947   | 5691667  | -679          | ENSG00000130255 | RPL36        |
| NR4A1_R848 | chr19   | 5762631   | 5763031  | Promoter (9-10kb) | 19      | 5753511   | 5778734  | 9120          | ENSG00000174898 | CATSPERD     |
| NR4A1_R848 | chr19   | 6209672   | 6210072  | Promoter (6-7kb)  | 19      | 6213120   | 6216968  | 6896          | ENSG00000130382 | MLLT1        |
| NR4A1_R848 | chr19   | 6710351   | 6710751  | Promoter (<=1kb)  | 19      | 6709756   | 6710957  | 206           | ENSG00000125730 | C3           |
| NR4A1_R848 | chr19   | 7842373   | 7842773  | Promoter (3-4kb)  | 19      | 7846543   | 7863702  | -3770         | ENSG00000142459 | EVI5L        |
| NR4A1_R848 | chr19   | 7953247   | 7953647  | Promoter (9-10kb) | 19      | 7928123   | 7943667  | -9580         | ENSG00000104980 | TIMM44       |
| NR4A1_R848 | chr19   | 8107307   | 8107707  | Promoter (4-5kb)  | 19      | 8110888   | 8111806  | 4099          | ENSG00000142449 | FBN3         |
| NR4A1_R848 | chr19   | 10006689  | 10007089 | Promoter (3-4kb)  | 19      | 9959561   | 10010504 | 3415          | ENSG00000080573 | COL5A3       |
| NR4A1_R848 | chr19   | 10377320  | 10377720 | Promoter (<=1kb)  | 19      | 10350529  | 10378508 | 788           | ENSG00000105397 | TYK2         |
| NR4A1_R848 | chr19   | 11394545  | 11394945 | Promoter (2-3kb)  | 19      | 11394064  | 11397546 | 2601          | ENSG00000205517 | RGL3         |
| NR4A1_R848 | chr19   | 11488356  | 11488756 | Promoter (1-2kb)  | 19      | 11484012  | 11487296 | -1060         | ENSG00000161914 | ZNF653       |
| NR4A1_R848 | chr19   | 12989063  | 12989528 | Promoter (6-7kb)  | 19      | 12995608  | 13096201 | -6080         | ENSG00000008441 | NFIX         |
| NR4A1_R848 | chr19   | 13633772  | 13634172 | Promoter (<=1kb)  | 19      | 13371761  | 13633025 | -747          | ENSG00000141837 | CACNA1A      |
| NR4A1_R848 | chr19   | 15425729  | 15426129 | Promoter (<=1kb)  | 19      | 15424060  | 15424839 | -890          | ENSG00000011451 | WIZ          |
| NR4A1_R848 | chr19   | 18441979  | 18442379 | Promoter (3-4kb)  | 19      | 18444516  | 18445399 | 3020          | ENSG00000105656 | ELL          |
| NR4A1_R848 | chr19   | 29390695  | 29391095 | Promoter (6-7kb)  | 19      | 29396469  | 29397810 | 6715          |                 |              |



| Condition    | peakChr | peakStart | peakEnd  | annotation        | geneChr | geneStart | geneEnd  | distanceToTSS | geneID          | geneSymbol   |
|--------------|---------|-----------|----------|-------------------|---------|-----------|----------|---------------|-----------------|--------------|
| NR4A1_R848   | chr19   | 48342146  | 48342546 | Promoter (<=1kb)  | 19      | 48333276  | 48342991 | 445           | ENSG00000161558 | TMEM143      |
| NR4A1_R848   | chr19   | 48821796  | 48822196 | Promoter (6-7kb)  | 19      | 48813018  | 48815072 | -6724         | ENSG00000087076 | HSD17B14     |
| NR4A1_R848   | chr19   | 49166693  | 49167093 | Promoter (<=1kb)  | 19      | 49167644  | 49168337 | -551          | ENSG00000130529 | TRPM4        |
| NR4A1_R848   | chr19   | 50455928  | 50456328 | Promoter (7-8kb)  | 19      | 50464231  | 50466319 | -7903         | ENSG00000086967 | MYBPC2       |
| NR4A1_R848   | chr19   | 50499816  | 50500216 | Promoter (7-8kb)  | 19      | 50506446  | 50508029 | 7813          | ENSG00000161677 | JOSD2        |
| NR4A1_R848   | chr19   | 50626295  | 50626695 | Promoter (<=1kb)  | 19      | 50622420  | 50626134 | -161          | ENSG00000213023 | SYT3         |
| NR4A1_R848   | chr19   | 50679720  | 50680120 | Promoter (9-10kb) | 19      | 50661827  | 50689404 | 9284          | ENSG00000161681 | SHANK1       |
| NR4A1_R848   | chr19   | 50699556  | 50699956 | Promoter (4-5kb)  | 19      | 50703699  | 50704506 | 4550          | ENSG00000161681 | SHANK1       |
| NR4A1_R848   | chr19   | 55434924  | 55435338 | Promoter (6-7kb)  | 19      | 55431976  | 55442337 | 6999          | ENSG00000187902 | SHISA7       |
| NR4A1_R848   | chr19   | 55606299  | 55606699 | Promoter (4-5kb)  | 19      | 55593360  | 55601970 | -4329         | ENSG00000179943 | FIZ1         |
| NR4A1_R848   | chr19   | 56159167  | 56159567 | Promoter (1-2kb)  | 19      | 56157309  | 56159967 | 1858          | ENSG00000167685 | ZNF444       |
| NR4A1_R848   | chr20   | 23979921  | 23980321 | Promoter (6-7kb)  | 20      | 23985050  | 23986795 | 6474          | ENSG00000149435 | GGTLC1       |
| NR4A1_R848   | chr20   | 25067696  | 25068096 | Promoter (8-9kb)  | 20      | 25045938  | 25058980 | -8716         | ENSG00000154930 | ACSS1        |
| NR4A1_R848   | chr20   | 25742046  | 25742446 | Promoter (8-9kb)  | 20      | 25751040  | 25752765 | -8594         | NA              | LOC105372582 |
| NR4A1_R848   | chr20   | 26074069  | 26074469 | Promoter (1-2kb)  | 20      | 26072673  | 26082955 | 1396          | ENSG00000125804 | FAM182A      |
| NR4A1_R848   | chr20   | 30283706  | 30284163 | Promoter (5-6kb)  | 20      | 30278906  | 30289205 | 5042          | NA              | LINC01597    |
| NR4A1_R848   | chr20   | 30377379  | 30377779 | Promoter (<=1kb)  | 20      | 30377372  | 30399257 | 7             | NA              | FRG1BP       |
| NR4A1_R848   | chr20   | 30412657  | 30413057 | Promoter (9-10kb) | 20      | 30403123  | 30403384 | -9273         | NA              | MLLT10P1     |
| NR4A1_R848   | chr20   | 36314781  | 36315181 | Promoter (8-9kb)  | 20      | 36306381  | 36528633 | 8400          | ENSG00000080845 | DLGAP4       |
| NR4A1_R848   | chr20   | 38314532  | 38314932 | Promoter (2-3kb)  | 20      | 38317649  | 38337325 | -2717         | ENSG00000101425 | BPI          |
| NR4A1_R848   | chr20   | 38653052  | 38653452 | Promoter (5-6kb)  | 20      | 38647063  | 38651035 | 5989          | ENSG00000124143 | ARHGAP40     |
| NR4A1_R848   | chr20   | 41376751  | 41377151 | Promoter (9-10kb) | 20      | 41359962  | 41366818 | -9933         | ENSG00000183798 | EMILIN3      |
| NR4A1_R848   | chr20   | 58694925  | 58695325 | Promoter (<=1kb)  | 20      | 58694421  | 58713580 | 504           | ENSG00000254995 | STX16-NPEPL1 |
| NR4A1_R848   | chr20   | 62398025  | 62398483 | Promoter (1-2kb)  | 20      | 62391014  | 62396331 | -1694         | ENSG00000149679 | CABLES2      |
| NR4A1_R848   | chr20   | 63492318  | 63492718 | Promoter (6-7kb)  | 20      | 63490081  | 63498748 | 6030          | ENSG00000101210 | EEF1A2       |
| NR4A1_R848   | chr21   | 8219707   | 8220159  | Promoter (7-8kb)  | 21      | 8212572   | 8212724  | 7135          | ENSG00000276700 | RNA5-8SN4    |
| NR4A1_R848   | chr21   | 8991239   | 8991639  | Promoter (4-5kb)  | 21      | 8986999   | 8987178  | 4240          | ENSG00000275708 | MIR3648-1    |
| NR4A1_R848   | chr21   | 8991973   | 8992373  | Promoter (4-5kb)  | 21      | 8986999   | 8987178  | 4974          | ENSG00000275708 | MIR3648-1    |
| NR4A1_R848   | chr21   | 36539258  | 36539658 | Promoter (2-3kb)  | 21      | 36460621  | 36542600 | 2942          | ENSG00000159261 | CLDN14       |
| NR4A1_R848   | chr21   | 38207056  | 38207456 | Promoter (<=1kb)  | 21      | 38206156  | 38208644 | 900           | ENSG00000233316 | DSCR10       |
| NR4A1_R848   | chr21   | 41954873  | 41955273 | Promoter (<=1kb)  | 21      | 41885112  | 41954018 | -855          | ENSG00000157617 | C2CD2        |
| NR4A1_R848   | chr21   | 42027344  | 42027744 | Promoter (5-6kb)  | 21      | 42022267  | 42024924 | 5077          | ENSG00000237232 | ZNF295-AS1   |
| NR4A1_R848   | chr21   | 42615242  | 42615642 | Promoter (<=1kb)  | 21      | 42599280  | 42615058 | -184          | ENSG00000225431 | LINC01671    |
| NR4A1_R848   | chr21   | 42662519  | 42663093 | Promoter (8-9kb)  | 21      | 42653813  | 42775509 | 8706          | ENSG00000160191 | PDE9A        |
| NR4A1_R848   | chr21   | 43467743  | 43468143 | Promoter (2-3kb)  | 21      | 43462094  | 43464973 | -2770         | ENSG00000185186 | LINC00313    |
| NR4A1_R848   | chr21   | 43958648  | 43959048 | Promoter (<=1kb)  | 21      | 43959783  | 43982724 | -735          | ENSG00000160216 | AGPAT3       |
| NR4A1_R848   | chr21   | 44419519  | 44419919 | Promoter (2-3kb)  | 21      | 44414595  | 44416740 | -2779         | NA              | TRPM2-AS     |
| NR4A1_R848   | chr21   | 44435547  | 44435947 | Promoter (9-10kb) | 21      | 44425556  | 44441874 | 9991          | ENSG00000142185 | TRPM2        |
| NR4A1_R848   | chr21   | 44523794  | 44524194 | Promoter (6-7kb)  | 21      | 44517620  | 44525952 | 6174          | NA              | TSPEAR-AS2   |
| NR4A1_R848   | chr21   | 45474328  | 45474728 | Promoter (3-4kb)  | 21      | 45478266  | 45478326 | -3538         | ENSG00000275167 | MIR6815      |
| NR4A1_R848   | chr21   | 45591329  | 45591729 | Promoter (1-2kb)  | 21      | 45593654  | 45603056 | -1925         | ENSG00000233922 | LINC01694    |
| NR4A1_R848   | chr21   | 45636092  | 45636492 | Promoter (7-8kb)  | 21      | 45643694  | 45788739 | -7202         | ENSG00000183570 | PCBP3        |
| NR4A1_R848   | chr21   | 46090835  | 46091255 | Promoter (6-7kb)  | 21      | 46098097  | 46132849 | -6842         | ENSG00000142173 | COL6A2       |
| NR4A1_R848   | chr21   | 46123994  | 46124394 | Promoter (3-4kb)  | 21      | 46120560  | 46125894 | 3434          | ENSG00000142173 | COL6A2       |
| NR4A1_R848   | chr21   | 46311594  | 46311994 | Promoter (<=1kb)  | 21      | 46301710  | 46311631 | 0             | ENSG00000160298 | C21orf58     |
| NR4A1_R848   | chr22   | 19994610  | 19995010 | Promoter (3-4kb)  | 22      | 19971228  | 19990794 | -3816         | ENSG00000099889 | ARVCF        |
| NR4A1_R848   | chr22   | 20251864  | 20252264 | Promoter (2-3kb)  | 22      | 20249134  | 20249211 | -2653         | ENSG00000221039 | MIR1286      |
| NR4A1_R848   | chr22   | 24172291  | 24172691 | Promoter (3-4kb)  | 22      | 24175779  | 24177538 | -3088         | ENSG00000099991 | CABIN1       |
| NR4A1_R848   | chr22   | 33556308  | 33556708 | Promoter (8-9kb)  | 22      | 33562913  | 33565019 | 8311          | ENSG00000133424 | LARGE1       |
| NR4A1_R848   | chr22   | 33730701  | 33731101 | Promoter (5-6kb)  | 22      | 33725072  | 33744192 | 5629          | ENSG00000224973 | LARGE-AS1    |
| NR4A1_R848   | chr22   | 35343474  | 35343874 | Promoter (<=1kb)  | 22      | 35344186  | 35347983 | -312          | ENSG00000100284 | TOM1         |
| NR4A1_R848   | chr22   | 36872752  | 36873152 | Promoter (<=1kb)  | 22      | 36872137  | 36877764 | 615           | ENSG00000100365 | NCF4         |
| NR4A1_R848   | chr22   | 38188964  | 38189364 | Promoter (2-3kb)  | 22      | 38145606  | 38192100 | 2736          | ENSG00000184381 | PLA2G6       |
| NR4A1_R848   | chr22   | 39565855  | 39566255 | Promoter (4-5kb)  | 22      | 39570753  | 39684528 | -4498         | ENSG00000100346 | CACNA1I      |
| NR4A1_R848   | chr22   | 41271515  | 41271915 | Promoter (2-3kb)  | 22      | 41256021  | 41274660 | 2745          | ENSG00000100401 | RANGAP1      |
| NR4A1_R848   | chr22   | 42862968  | 42863368 | Promoter (4-5kb)  | 22      | 42835413  | 42858106 | -4862         | ENSG00000242247 | ARFGAP3      |
| NR4A1_R848   | chr22   | 43508331  | 43508731 | Promoter (7-8kb)  | 22      | 43516107  | 43537117 | -7376         | NA              | EFCAB6-AS1   |
| NR4A1_R848   | chr22   | 45979775  | 45980175 | Promoter (2-3kb)  | 22      | 45920366  | 45977162 | -2613         | ENSG00000188064 | WNT7B        |
| NR4A1_R848   | chr22   | 48269218  | 48269618 | Promoter (4-5kb)  | 22      | 48274364  | 48274415 | -4746         | ENSG00000266508 | MIR3201      |
| NR4A1_R848   | chr22   | 48697809  | 48698209 | Promoter (4-5kb)  | 22      | 48693247  | 48750408 | 4562          | ENSG00000219438 | TAF15        |
| NR4A1_R848   | chr22   | 50234831  | 50235231 | Promoter (5-6kb)  | 22      | 50226735  | 50240360 | 5129          | ENSG00000128159 | TUBGCP6      |
| NR4A1_R848   | chr22   | 50608151  | 50608551 | Promoter (5-6kb)  | 22      | 50603133  | 50613981 | 5018          | ENSG00000008735 | MAPK8IP2     |
| NR4A2_Medium | chr1    | 1056632   | 1057032  | Promoter (2-3kb)  | 1       | 1059708   | 1066459  | -2676         | ENSG00000217801 | LOC100288175 |
| NR4A2_Medium | chr1    | 1195399   | 1195799  | Promoter (9-10kb) | 1       | 1203844   | 1205680  | 9881          | ENSG00000186891 | TNFRSF18     |
| NR4A2_Medium | chr1    | 1201543   | 1201943  | Promoter (3-4kb)  | 1       | 1203844   | 1205680  | 3737          | ENSG00000186891 | TNFRSF18     |
| NR4A2_Medium | chr1    | 1268795   | 1269195  | Promoter (4-5kb)  | 1       | 1267862   | 1273471  | 4276          | ENSG00000160087 | UBE2J2       |
| NR4A2_Medium | chr1    | 1301079   | 1301479  | Promoter (1-2kb)  | 1       | 1296466   | 1299617  | -1462         | ENSG00000131584 | ACAP3        |
| NR4A2_Medium | chr1    | 1360955   | 1361355  | Promoter (<=1kb)  | 1       | 1352692   | 1361777  | 422           | ENSG00000162576 | MXRA8        |
| NR4A2_Medium | chr1    | 1423629   | 1424029  | Promoter (1-2kb)  | 1       | 1418420   | 1421769  | -1860         | ENSG00000235098 | ANKRD65      |
| NR4A2_Medium | chr1    | 1549647   | 1550047  | Promoter (3-4kb)  | 1       | 1541674   | 1546487  | -3160         | ENSG00000160075 | SSU72        |
| NR4A2_Medium | chr1    | 1594892   | 1595292  | Promoter (4-5kb)  | 1       | 1598012   | 1600135  | 4843          | ENSG00000228594 | FNDC10       |
| NR4A2_Medium | chr1    | 1595423   | 1595823  | Promoter (4-5kb)  | 1       | 1598012   | 1600135  | 4312          | ENSG00000228594 | FNDC10       |
| NR4A2_Medium | chr1    | 1776980   | 1777380  | Promoter (1-2kb)  | 1       | 1756588   | 1778419  | 1039          | ENSG00000008130 | NADK         |
| NR4A2_Medium | chr1    | 1840038   | 1840438  | Promoter (7-8kb)  | 1       | 1804526   | 1832285  | -7753         | ENSG00000078369 | GNB1         |
| NR4A2_Medium | chr1    | 1924752   | 1925152  | Promoter (2-3kb)  | 1       | 1922083   | 1927403  | 2251          | ENSG00000142609 | CFAP74       |
| NR4A2_Medium | chr1    | 1931568   | 1931968  | Promoter (3-4kb)  | 1       | 1921957   | 1927929  | -3639         | ENSG00000142609 | CFAP74       |
| NR4A2_Medium | chr1    | 2189148   | 2189548  | Promoter (4-5kb)  | 1       | 2189544   | 2194108  | 4560          | ENSG00000162585 | FAAP20       |
| NR4A2_Medium | chr1    | 2345466   | 2345866  | Promoter (5-6kb)  | 1       | 2351644   | 2351857  | 5991          | ENSG00000269896 | LOC100129534 |
| NR4A2_Medium | chr1    | 2435973   | 2436373  | Promoter (9-10kb) | 1       | 2425980   | 2479804  | 9993          | ENSG00000149527 | PLCH2        |
| NR4A2_Medium | chr1    | 3025896   | 3026296  | Promoter (4-5kb)  | 1       | 3021467   | 3022903  | 4429          | ENSG00000169717 | ACTRT2       |
| NR4A2_Medium | chr1    | 3129179   | 3129579  | Promoter (1-2kb)  | 1       | 3127975   | 3128035  | 1204          | ENSG00000283572 | MIR4251      |
| NR4A2_Medium | chr1    | 3132682   | 3133082  | Promoter (4-5kb)  | 1       | 3127975   | 3128035  | 4707          | ENSG00000283572 | MIR4251      |
| NR4A2_Medium | chr1    | 3228536   | 3228936  | Promoter (8-9kb)  | 1       | 3237931   | 3433925  | -8995         | ENSG00000142611 | PRDM16       |
| NR4A2_Medium | chr1    | 3247712   | 3248112  | Promoter (3-4kb)  | 1       | 3244132   | 3386918  | 3580          | ENSG00000142611 | PRDM16       |
| NR4A2_Medium | chr1    | 3393904   | 3394304  | Promoter (2-3kb)  | 1       | 3396491   | 3434293  | -2187         | ENSG00000142611 | PRDM16       |
| NR4A2_Medium | chr1    | 3676073   | 3676473  | Promoter (5-6kb)  | 1       | 3682366   | 3733079  | -5893         | ENSG00000078900 | TP73         |
| NR4A2_Medium | chr1    | 3687349   | 3687749  | Promoter (2-3kb)  | 1       | 3690672   | 3733292  | -2923         | ENSG00000078900 | TP73         |
| NR4A2_Medium | chr1    | 3726357   | 3727097  | Promoter (<=1kb)  | 1       | 3727478   | 3733367  | -381          | ENSG00000078900 | TP73         |
| NR4A2_Medium | chr1    | 3800109   | 3800509  | Promoter (3-4kb)  | 1       | 3778559   | 3796498  | -3611         | ENSG00000130764 | LRRC47       |
| NR4A2_Medium | chr1    | 3808811   | 3809211  | Promoter (7-8kb)  | 1       | 3815239   | 3816458  | 7247          | ENSG00000116198 | CEP104       |
| NR4A2_Medium | chr1    | 3849482   | 3849882  | Promoter (1-2kb)  | 1       | 3839757   | 3847704  | -1778         | ENSG00000116198 | CEP104       |
| NR4A2_Medium | chr1    | 3957681   | 3958081  | Promoter (8-9kb)  | 1       | 3947144   | 3949024  | -8657         | ENSG00000226374 | LINC01345    |
| NR4A2_Medium | chr1    | 4574676   | 4575076  | Promoter (3-4kb)  | 1       | 4571548   | 4583421  | 3128          | ENSG00000232596 | LINC01646    |
| NR4A2_Medium | chr1    | 5861295   | 5861695  | Promoter (1-2kb)  | 1       | 5862672   | 5862741  | 1046          | ENSG00000264101 | MIR4689      |
| NR4A2_Medium | chr1    | 6107973   | 6108373  | Promoter (1-2kb)  | 1       |           |          |               |                 |              |

| Condition    | peakChr | peakStart | peakEnd  | annotation        | geneChr | geneStart | geneEnd  | distanceToTSS | geneID          | geneSymbol |
|--------------|---------|-----------|----------|-------------------|---------|-----------|----------|---------------|-----------------|------------|
| NR4A2_Medium | chr1    | 7943437   | 7943837  | Promoter (<=1kb)  | 1       | 7915894   | 7943165  | -272          | ENSG00000049249 | TNFRSF9    |
| NR4A2_Medium | chr1    | 9356844   | 9357381  | Promoter (1-2kb)  | 1       | 9355707   | 9367575  | 1137          | ENSG00000171621 | SPSB1      |
| NR4A2_Medium | chr1    | 9359632   | 9360032  | Promoter (3-4kb)  | 1       | 9355707   | 9367575  | 3925          | ENSG00000171621 | SPSB1      |
| NR4A2_Medium | chr1    | 9547945   | 9548345  | Promoter (8-9kb)  | 1       | 9539465   | 9585173  | 8480          | ENSG00000171612 | SLC25A33   |
| NR4A2_Medium | chr1    | 9583794   | 9584194  | Promoter (4-5kb)  | 1       | 9588911   | 9614877  | -4717         | ENSG00000188807 | TMEM201    |
| NR4A2_Medium | chr1    | 9932221   | 9932621  | Promoter (<=1kb)  | 1       | 9930261   | 9932180  | -41           | ENSG00000162441 | LZIC       |
| NR4A2_Medium | chr1    | 10293243  | 10293643 | Promoter (5-6kb)  | 1       | 10298966  | 10299072 | -5323         | ENSG00000206625 | RNU6-1     |
| NR4A2_Medium | chr1    | 10296743  | 10297143 | Promoter (1-2kb)  | 1       | 10298966  | 10299072 | -1823         | ENSG00000206625 | RNU6-1     |
| NR4A2_Medium | chr1    | 11002488  | 11002888 | Promoter (9-10kb) | 1       | 11012344  | 11020489 | -9456         | ENSG00000120948 | TARDBP     |
| NR4A2_Medium | chr1    | 11039654  | 11040054 | Promoter (3-4kb)  | 1       | 11037693  | 11043198 | 3144          | ENSG00000009724 | MASP2      |
| NR4A2_Medium | chr1    | 11041536  | 11041936 | Promoter (1-2kb)  | 1       | 11037693  | 11043198 | 1262          | ENSG00000009724 | MASP2      |
| NR4A2_Medium | chr1    | 11852563  | 11852963 | Promoter (4-5kb)  | 1       | 11845879  | 11848345 | -4218         | ENSG00000175206 | NPPA       |
| NR4A2_Medium | chr1    | 12059054  | 12059454 | Promoter (3-4kb)  | 1       | 12063303  | 12144207 | -3849         | ENSG00000120949 | TNFRSF8    |
| NR4A2_Medium | chr1    | 12070925  | 12071325 | Promoter (7-8kb)  | 1       | 12063470  | 12143117 | 7455          | ENSG00000120949 | TNFRSF8    |
| NR4A2_Medium | chr1    | 12188922  | 12189322 | Promoter (2-3kb)  | 1       | 12191713  | 12191773 | -2391         | ENSG00000263676 | MIR4632    |
| NR4A2_Medium | chr1    | 12579572  | 12579972 | Promoter (<=1kb)  | 1       | 12578957  | 12579023 | -549          | ENSG00000276830 | MIR6730    |
| NR4A2_Medium | chr1    | 12582836  | 12583236 | Promoter (3-4kb)  | 1       | 12578957  | 12579023 | -3813         | ENSG00000276830 | MIR6730    |
| NR4A2_Medium | chr1    | 12634741  | 12635141 | Promoter (9-10kb) | 1       | 12644547  | 12667086 | -9406         | ENSG00000204518 | AADACL4    |
| NR4A2_Medium | chr1    | 13712851  | 13713251 | Promoter (7-8kb)  | 1       | 13704855  | 13825079 | 7996          | ENSG00000116731 | PRDM2      |
| NR4A2_Medium | chr1    | 15365054  | 15365454 | Promoter (2-3kb)  | 1       | 15362697  | 15398127 | 2357          | ENSG00000142621 | FHAD1      |
| NR4A2_Medium | chr1    | 15370358  | 15370758 | Promoter (4-5kb)  | 1       | 15375700  | 15400283 | -4942         | ENSG00000142621 | FHAD1      |
| NR4A2_Medium | chr1    | 15685874  | 15686274 | Promoter (1-2kb)  | 1       | 15684556  | 15734769 | 1318          | ENSG00000116786 | PLEKHM2    |
| NR4A2_Medium | chr1    | 15818034  | 15818434 | Promoter (8-9kb)  | 1       | 15807169  | 15809348 | -8686         | ENSG00000233954 | UQCRHL     |
| NR4A2_Medium | chr1    | 15936576  | 15936976 | Promoter (1-2kb)  | 1       | 15938583  | 15939544 | -1607         | ENSG00000065526 | SPEN       |
| NR4A2_Medium | chr1    | 16019418  | 16019818 | Promoter (<=1kb)  | 1       | 16014028  | 16019594 | 0             | ENSG00000173641 | HSPB7      |
| NR4A2_Medium | chr1    | 16045398  | 16045798 | Promoter (1-2kb)  | 1       | 16043777  | 16057308 | 1621          | ENSG00000184908 | CLCNKB     |
| NR4A2_Medium | chr1    | 16065550  | 16065950 | Promoter (7-8kb)  | 1       | 16058279  | 16073632 | 7682          | ENSG00000185519 | FAM131C    |
| NR4A2_Medium | chr1    | 16231452  | 16231852 | Promoter (4-5kb)  | 1       | 16232281  | 16236659 | 4807          | ENSG00000132881 | CPLANE2    |
| NR4A2_Medium | chr1    | 16342383  | 16342783 | Promoter (9-10kb) | 1       | 16246840  | 16352480 | 9697          | ENSG00000037637 | FBXO42     |
| NR4A2_Medium | chr1    | 16393655  | 16394055 | Promoter (9-10kb) | 1       | 16387117  | 16403974 | 9919          | ENSG00000187144 | SPATA21    |
| NR4A2_Medium | chr1    | 16476449  | 16476849 | Promoter (6-7kb)  | 1       | 16476930  | 16483341 | 6492          | ENSG00000080947 | CROCCP3    |
| NR4A2_Medium | chr1    | 16499574  | 16499974 | Promoter (<=1kb)  | 1       | 16490646  | 16499257 | -317          | ENSG00000080947 | CROCCP3    |
| NR4A2_Medium | chr1    | 16629227  | 16629627 | Promoter (<=1kb)  | 1       | 16618256  | 16628652 | -575          | ENSG00000215908 | CROCCP2    |
| NR4A2_Medium | chr1    | 16718212  | 16718612 | Promoter (1-2kb)  | 1       | 16692280  | 16720157 | 1545          | NA              | ESPNNP     |
| NR4A2_Medium | chr1    | 16897394  | 16897794 | Promoter (1-2kb)  | 1       | 16895980  | 16896143 | 1414          | ENSG00000206737 | RNVU1-18   |
| NR4A2_Medium | chr1    | 16986607  | 16987007 | Promoter (2-3kb)  | 1       | 16985981  | 16990003 | 2996          | ENSG00000159363 | ATP13A2    |
| NR4A2_Medium | chr1    | 17025140  | 17025540 | Promoter (1-2kb)  | 1       | 17018752  | 17023160 | -1980         | ENSG00000117118 | SDHB       |
| NR4A2_Medium | chr1    | 18858004  | 18858404 | Promoter (1-2kb)  | 1       | 18839599  | 18859682 | 1278          | ENSG00000179002 | TAS1R2     |
| NR4A2_Medium | chr1    | 18858529  | 18858929 | Promoter (<=1kb)  | 1       | 18839599  | 18859682 | 753           | ENSG00000179002 | TAS1R2     |
| NR4A2_Medium | chr1    | 19166571  | 19166971 | Promoter (1-2kb)  | 1       | 19121213  | 19168055 | 1084          | ENSG00000127481 | UBR4       |
| NR4A2_Medium | chr1    | 19269321  | 19269721 | Promoter (1-2kb)  | 1       | 19270533  | 19271269 | 1548          | ENSG00000211454 | AKR7L      |
| NR4A2_Medium | chr1    | 19290112  | 19290512 | Promoter (1-2kb)  | 1       | 19282573  | 19288770 | -1342         | ENSG00000162482 | AKR7A3     |
| NR4A2_Medium | chr1    | 19697533  | 19697933 | Promoter (3-4kb)  | 1       | 19694492  | 19701210 | 3277          | ENSG00000162542 | TMCO4      |
| NR4A2_Medium | chr1    | 19744986  | 19745386 | Promoter (6-7kb)  | 1       | 19682242  | 19738419 | -6567         | ENSG00000162542 | TMCO4      |
| NR4A2_Medium | chr1    | 20029412  | 20029812 | Promoter (<=1kb)  | 1       | 20028526  | 20090780 | 886           | ENSG00000127472 | PLA2G5     |
| NR4A2_Medium | chr1    | 20284747  | 20285147 | Promoter (5-6kb)  | 1       | 20290919  | 20354251 | -5772         | ENSG00000158816 | VWA5B1     |
| NR4A2_Medium | chr1    | 20290968  | 20291368 | Promoter (<=1kb)  | 1       | 20290937  | 20339222 | 31            | ENSG00000158816 | VWA5B1     |
| NR4A2_Medium | chr1    | 20544099  | 20544499 | Promoter (8-9kb)  | 1       | 20552573  | 20555020 | -8074         | ENSG00000183114 | FAM43B     |
| NR4A2_Medium | chr1    | 20595057  | 20595457 | Promoter (5-6kb)  | 1       | 20589097  | 20618903 | 5960          | ENSG00000158825 | CDA        |
| NR4A2_Medium | chr1    | 20664383  | 20664783 | Promoter (2-3kb)  | 1       | 20651767  | 20661544 | -2839         | ENSG00000244038 | DDOST      |
| NR4A2_Medium | chr1    | 20672207  | 20672607 | Promoter (<=1kb)  | 1       | 20672016  | 20673020 | 413           | ENSG00000117245 | KIF17      |
| NR4A2_Medium | chr1    | 20729995  | 20730395 | Promoter (<=1kb)  | 1       | 20727032  | 20731175 | 780           | ENSG00000189410 | SH2D5      |
| NR4A2_Medium | chr1    | 20758277  | 20758677 | Promoter (8-9kb)  | 1       | 20745592  | 20750251 | -8026         | ENSG00000127483 | HP1BP3     |
| NR4A2_Medium | chr1    | 21218541  | 21218941 | Promoter (3-4kb)  | 1       | 21219814  | 21222081 | 3140          | ENSG00000117298 | ECE1       |
| NR4A2_Medium | chr1    | 21479535  | 21479935 | Promoter (6-7kb)  | 1       | 21473395  | 21480221 | 6140          | ENSG00000142794 | NBPF3      |
| NR4A2_Medium | chr1    | 21731296  | 21731696 | Promoter (1-2kb)  | 1       | 21723972  | 21732826 | 1130          | ENSG00000090686 | USP48      |
| NR4A2_Medium | chr1    | 21881576  | 21881976 | Promoter (2-3kb)  | 1       | 21877514  | 21879074 | -2502         | ENSG00000142798 | HSPG2      |
| NR4A2_Medium | chr1    | 21893692  | 21894092 | Promoter (2-3kb)  | 1       | 21889816  | 21896271 | 2179          | ENSG00000142798 | HSPG2      |
| NR4A2_Medium | chr1    | 21938996  | 21939396 | Promoter (1-2kb)  | 1       | 21822244  | 21937310 | -1686         | ENSG00000142798 | HSPG2      |
| NR4A2_Medium | chr1    | 22137013  | 22137413 | Promoter (5-6kb)  | 1       | 22117313  | 22143097 | 5684          | ENSG00000162552 | WNT4       |
| NR4A2_Medium | chr1    | 22556258  | 22556658 | Promoter (6-7kb)  | 1       | 22563489  | 22603595 | -6831         | ENSG00000070886 | EPHA8      |
| NR4A2_Medium | chr1    | 22707220  | 22707620 | Promoter (3-4kb)  | 1       | 22710839  | 22891265 | -3219         | ENSG00000133216 | EPHB2      |
| NR4A2_Medium | chr1    | 23630795  | 23631195 | Promoter (3-4kb)  | 1       | 23627334  | 23640568 | 3461          | ENSG00000197880 | MDS2       |
| NR4A2_Medium | chr1    | 23736987  | 23737387 | Promoter (5-6kb)  | 1       | 23743155  | 23762059 | -5768         | ENSG00000011007 | ELOA       |
| NR4A2_Medium | chr1    | 23770899  | 23771299 | Promoter (1-2kb)  | 1       | 23771611  | 23772397 | 1098          | ENSG00000236810 | ELOA-AS1   |
| NR4A2_Medium | chr1    | 24075229  | 24075629 | Promoter (8-9kb)  | 1       | 24056035  | 24066579 | -8650         | ENSG00000142661 | MYOM3      |
| NR4A2_Medium | chr1    | 24199766  | 24200166 | Promoter (<=1kb)  | 1       | 24200240  | 24211693 | -74           | ENSG00000230023 | LINC02800  |
| NR4A2_Medium | chr1    | 24372381  | 24372781 | Promoter (7-8kb)  | 1       | 24369043  | 24379823 | 7042          | ENSG00000001460 | STPG1      |
| NR4A2_Medium | chr1    | 24543655  | 24544055 | Promoter (8-9kb)  | 1       | 24496270  | 24535400 | -8255         | ENSG00000286061 | RCAN3AS    |
| NR4A2_Medium | chr1    | 24738752  | 24739152 | Promoter (6-7kb)  | 1       | 24745382  | 24839907 | -6230         | ENSG00000169504 | CLIC4      |
| NR4A2_Medium | chr1    | 25028429  | 25028829 | Promoter (4-5kb)  | 1       | 25023503  | 25023586 | 4926          | ENSG00000264371 | MIR4425    |
| NR4A2_Medium | chr1    | 26829015  | 26829415 | Promoter (2-3kb)  | 1       | 26826688  | 26857604 | 2327          | ENSG00000204160 | ZDHHC18    |
| NR4A2_Medium | chr1    | 26920509  | 26920909 | Promoter (<=1kb)  | 1       | 26921743  | 26946871 | -834          | ENSG00000090273 | NUDC       |
| NR4A2_Medium | chr1    | 26988338  | 26988738 | Promoter (4-5kb)  | 1       | 26993692  | 27000886 | -4954         | ENSG00000253368 | TRNP1      |
| NR4A2_Medium | chr1    | 27377927  | 27378327 | Promoter (3-4kb)  | 1       | 27369112  | 27374824 | -3103         | ENSG00000142748 | FCN3       |
| NR4A2_Medium | chr1    | 27562971  | 27563371 | Promoter (4-5kb)  | 1       | 27551668  | 27558361 | -4610         | ENSG00000126705 | AHDC1      |
| NR4A2_Medium | chr1    | 27665999  | 27666399 | Promoter (3-4kb)  | 1       | 27660328  | 27662722 | -3277         | ENSG00000233975 | LINC02574  |
| NR4A2_Medium | chr1    | 27902308  | 27902708 | Promoter (5-6kb)  | 1       | 27891538  | 27897085 | -5223         | ENSG00000117748 | RPA2       |
| NR4A2_Medium | chr1    | 28543741  | 28544141 | Promoter (7-8kb)  | 1       | 28536093  | 28537898 | 7648          | ENSG00000180198 | RCC1       |
| NR4A2_Medium | chr1    | 28569439  | 28569839 | Promoter (8-9kb)  | 1       | 28560633  | 28577775 | 8806          | ENSG00000180098 | TRNAU1AP   |
| NR4A2_Medium | chr1    | 29133610  | 29134010 | Promoter (9-10kb) | 1       | 29119429  | 29123903 | -9707         | ENSG00000253304 | TMEM200B   |
| NR4A2_Medium | chr1    | 29280562  | 29280962 | Promoter (1-2kb)  | 1       | 29279551  | 29312706 | 1011          | ENSG00000060656 | PTPRU      |
| NR4A2_Medium | chr1    | 29326419  | 29326819 | Promoter (3-4kb)  | 1       | 29323218  | 29325650 | 3201          | ENSG00000060656 | PTPRU      |
| NR4A2_Medium | chr1    | 30043041  | 30043441 | Promoter (5-6kb)  | 1       | 30013952  | 30037612 | -5429         | ENSG00000233399 | LINC01648  |
| NR4A2_Medium | chr1    | 31646938  | 31647338 | Promoter (2-3kb)  | 1       | 31630449  | 31644896 | -2042         | ENSG00000162517 | PEF1       |
| NR4A2_Medium | chr1    | 31672635  | 31673035 | Promoter (<=1kb)  | 1       | 31666037  | 31673152 | 117           | ENSG00000084636 | COL16A1    |
| NR4A2_Medium | chr1    | 32179692  | 32180092 | Promoter (<=1kb)  | 1       | 32180065  | 32198285 | 0             | ENSG00000084652 | TXLNA      |
| NR4A2_Medium | chr1    | 32267758  | 32268158 | Promoter (5-6kb)  | 1       | 32274111  | 32286164 | -5953         | ENSG00000182866 | LCK        |
| NR4A2_Medium | chr1    | 32340100  | 32340500 | Promoter (3-4kb)  | 1       | 32333839  | 32336233 | -3867         | ENSG00000175130 | MARCKSL1   |
| NR4A2_Medium | chr1    | 32460912  | 32461312 | Promoter (3-4kb)  | 1       | 32465057  | 32600792 | -3745         | ENSG00000160062 | ZBTB8A     |
| NR4A2_Medium | chr1    | 32529238  | 32529638 | Promoter (9-10kb) | 1       | 32539427  | 32605941 | -9789         | ENSG00000160062 | ZBTB8A     |
| NR4A2_Medium | chr1    | 32544333  | 32544733 | Promoter (4-5kb)  | 1       | 32539429  | 32600990 | 4904          | ENSG00000160062 | ZBTB8A     |
| NR4A2_Medium | chr1    | 32648715  | 32649115 | Promoter (1-2kb)  | 1       | 32621830  | 32650525 | 1410          | ENSG00000176261 | ZBTB8OS    |
| NR4A2_Medium | chr1    | 32760525  | 32760925 | Promoter (4-5kb)  | 1       | 32765634  | 32773197 | -4709         | ENSG00000162522 | KIAA1522   |
| NR4A2_Medium | chr1    | 32869812  | 32870212 | Promoter (<=1kb)  | 1       | 32864294  | 32870746 | 534           | ENSG00000160097 | FNDC5      |
| NR4A2_Medium | chr1    | 33571212  | 33571612 | Promoter (<=1kb)  | 1       |           |          |               |                 |            |



| Condition    | peakChr | peakStart | peakEnd   | annotation        | geneChr | geneStart | geneEnd   | distanceToTSS | geneID          | geneSymbol   |
|--------------|---------|-----------|-----------|-------------------|---------|-----------|-----------|---------------|-----------------|--------------|
| NR4A2_Medium | chr1    | 40778926  | 40779326  | Promoter (4-5kb)  | 1       | 40783787  | 40840452  | -4461         | ENSG00000117013 | KCNQ4        |
| NR4A2_Medium | chr1    | 41669269  | 41669669  | Promoter (6-7kb)  | 1       | 41506365  | 41662325  | -6944         | ENSG00000127124 | HIVEP3       |
| NR4A2_Medium | chr1    | 42455151  | 42455551  | Promoter (<=1kb)  | 1       | 42436421  | 42456011  | 460           | ENSG00000066185 | ZMYND12      |
| NR4A2_Medium | chr1    | 43412793  | 43413193  | Promoter (7-8kb)  | 1       | 43420757  | 43429489  | -7564         | ENSG00000198198 | SZT2         |
| NR4A2_Medium | chr1    | 43582703  | 43583103  | Promoter (<=1kb)  | 1       | 43582480  | 43591118  | 223           | ENSG00000142949 | PTPRF        |
| NR4A2_Medium | chr1    | 43878746  | 43879146  | Promoter (<=1kb)  | 1       | 43879244  | 43930838  | -98           | ENSG00000126091 | ST3GAL3      |
| NR4A2_Medium | chr1    | 43904676  | 43905076  | Promoter (5-6kb)  | 1       | 43899588  | 43930176  | 5088          | ENSG00000126091 | ST3GAL3      |
| NR4A2_Medium | chr1    | 43905977  | 43906377  | Promoter (6-7kb)  | 1       | 43899588  | 43930176  | 6389          | ENSG00000126091 | ST3GAL3      |
| NR4A2_Medium | chr1    | 44247059  | 44247459  | Promoter (<=1kb)  | 1       | 44221429  | 44247966  | 507           | ENSG00000117419 | ER13         |
| NR4A2_Medium | chr1    | 44751653  | 44752053  | Promoter (5-6kb)  | 1       | 44746406  | 44767767  | 5247          | ENSG00000142945 | KIF2C        |
| NR4A2_Medium | chr1    | 44983622  | 44984022  | Promoter (2-3kb)  | 1       | 44926628  | 44986586  | 2564          | ENSG00000070785 | EIF2B3       |
| NR4A2_Medium | chr1    | 45003846  | 45004246  | Promoter (1-2kb)  | 1       | 45002540  | 45005588  | 1342          | ENSG00000126107 | HECTD3       |
| NR4A2_Medium | chr1    | 45709384  | 45709784  | Promoter (4-5kb)  | 1       | 45697059  | 45714252  | 4468          | ENSG00000197429 | IPP          |
| NR4A2_Medium | chr1    | 45785692  | 45786092  | Promoter (<=1kb)  | 1       | 45786987  | 45917509  | -895          | ENSG00000086015 | MAST2        |
| NR4A2_Medium | chr1    | 45921295  | 45921695  | Promoter (7-8kb)  | 1       | 45913588  | 46030759  | 7707          | ENSG00000086015 | MAST2        |
| NR4A2_Medium | chr1    | 46271830  | 46272230  | Promoter (<=1kb)  | 1       | 46272466  | 46278439  | -236          | ENSG00000085999 | RAD54L       |
| NR4A2_Medium | chr1    | 46346068  | 46346468  | Promoter (2-3kb)  | 1       | 46344012  | 46345374  | 2056          | ENSG00000117481 | NSUN4        |
| NR4A2_Medium | chr1    | 46424221  | 46424621  | Promoter (7-8kb)  | 1       | 46432129  | 46445321  | -7508         | NA              | FAAHP1       |
| NR4A2_Medium | chr1    | 46907938  | 46908338  | Promoter (7-8kb)  | 1       | 46843095  | 46900437  | -7501         | ENSG00000154198 | CYP4Z2P      |
| NR4A2_Medium | chr1    | 47199438  | 47199838  | Promoter (8-9kb)  | 1       | 47183971  | 47191044  | -8394         | ENSG00000162366 | PDZK1IP1     |
| NR4A2_Medium | chr1    | 47307094  | 47307494  | Promoter (1-2kb)  | 1       | 47302234  | 47305317  | -1777         | ENSG00000123473 | STIL         |
| NR4A2_Medium | chr1    | 48192167  | 48192567  | Promoter (9-10kb) | 1       | 48164710  | 48182428  | -9739         | NA              | SKINT1L      |
| NR4A2_Medium | chr1    | 48243775  | 48244175  | Promoter (3-4kb)  | 1       | 48240384  | 48248638  | 3391          | ENSG00000117834 | SLC5A9       |
| NR4A2_Medium | chr1    | 50043439  | 50043839  | Promoter (3-4kb)  | 1       | 50047607  | 50177192  | -3768         | ENSG00000162374 | ELAVL4       |
| NR4A2_Medium | chr1    | 51514815  | 51515215  | Promoter (4-5kb)  | 1       | 51461123  | 51519227  | 4012          | ENSG00000085832 | EPS15        |
| NR4A2_Medium | chr1    | 51578572  | 51578972  | Promoter (1-2kb)  | 1       | 51577179  | 51788469  | 1393          | ENSG00000117859 | OSBPL9       |
| NR4A2_Medium | chr1    | 52442914  | 52443314  | Promoter (3-4kb)  | 1       | 52431126  | 52446628  | 3314          | ENSG00000134744 | TUT4         |
| NR4A2_Medium | chr1    | 52562789  | 52563189  | Promoter (9-10kb) | 1       | 52526050  | 52553487  | -9302         | ENSG00000134744 | TUT4         |
| NR4A2_Medium | chr1    | 53132766  | 53133166  | Promoter (9-10kb) | 1       | 53087183  | 53142577  | 9411          | ENSG00000162383 | SLC1A7       |
| NR4A2_Medium | chr1    | 53836420  | 53836820  | Promoter (1-2kb)  | 1       | 53765478  | 53838296  | 1476          | ENSG00000058804 | NDC1         |
| NR4A2_Medium | chr1    | 54042867  | 54043267  | Promoter (1-2kb)  | 1       | 54031676  | 54044942  | 1675          | ENSG00000116209 | TMEM59       |
| NR4A2_Medium | chr1    | 54202124  | 54202524  | Promoter (1-2kb)  | 1       | 54200204  | 54210131  | 1920          | ENSG00000116221 | MRPL37       |
| NR4A2_Medium | chr1    | 54206296  | 54206696  | Promoter (3-4kb)  | 1       | 54209946  | 54220930  | -3250         | ENSG00000116221 | MRPL37       |
| NR4A2_Medium | chr1    | 54233517  | 54233917  | Promoter (2-3kb)  | 1       | 54236440  | 54239063  | -2523         | ENSG00000198711 | SSBP3-AS1    |
| NR4A2_Medium | chr1    | 54647440  | 54647840  | Promoter (3-4kb)  | 1       | 54651237  | 54710266  | -3397         | ENSG00000184313 | MROH7        |
| NR4A2_Medium | chr1    | 54677773  | 54678173  | Promoter (8-9kb)  | 1       | 54686265  | 54695782  | -8092         | ENSG00000184313 | MROH7        |
| NR4A2_Medium | chr1    | 54736734  | 54737134  | Promoter (<=1kb)  | 1       | 54736689  | 54742307  | 45            | ENSG00000243725 | TTC4         |
| NR4A2_Medium | chr1    | 54881297  | 54881697  | Promoter (4-5kb)  | 1       | 54871592  | 54886490  | 4793          | ENSG00000116133 | DHCR24       |
| NR4A2_Medium | chr1    | 55044984  | 55045384  | Promoter (5-6kb)  | 1       | 55039548  | 55064852  | 5436          | ENSG00000169174 | PCSK9        |
| NR4A2_Medium | chr1    | 55046046  | 55046446  | Promoter (4-5kb)  | 1       | 55050934  | 55064850  | -4488         | ENSG00000169174 | PCSK9        |
| NR4A2_Medium | chr1    | 57876596  | 57876996  | Promoter (7-8kb)  | 1       | 57826071  | 57884085  | 7089          | ENSG00000173406 | DAB1         |
| NR4A2_Medium | chr1    | 59822238  | 59822638  | Promoter (7-8kb)  | 1       | 59815172  | 59873007  | 7066          | ENSG00000134709 | HOOK1        |
| NR4A2_Medium | chr1    | 60074339  | 60074739  | Promoter (<=1kb)  | 1       | 59990394  | 60073770  | -569          | ENSG00000162598 | C1orf87      |
| NR4A2_Medium | chr1    | 62117100  | 62117500  | Promoter (3-4kb)  | 1       | 62114090  | 62117395  | 3010          | ENSG00000132849 | PATJ         |
| NR4A2_Medium | chr1    | 62658658  | 62659058  | Promoter (4-5kb)  | 1       | 62627559  | 62663106  | 4048          | ENSG00000116641 | DOCK7        |
| NR4A2_Medium | chr1    | 63329595  | 63329995  | Promoter (2-3kb)  | 1       | 63326925  | 63326984  | -2611         | ENSG00000275836 | MIR6068      |
| NR4A2_Medium | chr1    | 64782895  | 64783295  | Promoter (4-5kb)  | 1       | 64778066  | 64816509  | 4829          | ENSG00000162437 | RAVER2       |
| NR4A2_Medium | chr1    | 66691273  | 66691673  | Promoter (3-4kb)  | 1       | 66694694  | 66745084  | -3021         | ENSG00000118473 | SGIP1        |
| NR4A2_Medium | chr1    | 71044902  | 71045302  | Promoter (2-3kb)  | 1       | 70852573  | 71047633  | 2331          | ENSG00000050628 | PTGER3       |
| NR4A2_Medium | chr1    | 74513346  | 74513746  | Promoter (<=1kb)  | 1       | 74469878  | 74512614  | -732          | ENSG00000162621 | LRRC53       |
| NR4A2_Medium | chr1    | 74702910  | 74703310  | Promoter (5-6kb)  | 1       | 74705488  | 74708827  | 5517          | ENSG00000116791 | CRYZ         |
| NR4A2_Medium | chr1    | 76067166  | 76067566  | Promoter (7-8kb)  | 1       | 76074746  | 76634603  | -7180         | ENSG00000184005 | ST6GALNAC3   |
| NR4A2_Medium | chr1    | 77884018  | 77884418  | Promoter (4-5kb)  | 1       | 77888513  | 77933384  | -4095         | ENSG00000162614 | NEXN         |
| NR4A2_Medium | chr1    | 77933837  | 77934237  | Promoter (2-3kb)  | 1       | 77931662  | 77943199  | 2175          | ENSG00000162614 | NEXN         |
| NR4A2_Medium | chr1    | 78043191  | 78043591  | Promoter (2-3kb)  | 1       | 78045966  | 78138444  | -2375         | ENSG00000137960 | GIPC2        |
| NR4A2_Medium | chr1    | 78310033  | 78310433  | Promoter (6-7kb)  | 1       | 78303884  | 78539749  | 6149          | ENSG00000122420 | PTGFR        |
| NR4A2_Medium | chr1    | 83999236  | 83999636  | Promoter (<=1kb)  | 1       | 83912996  | 83999150  | -86           | ENSG00000137941 | TTLL7        |
| NR4A2_Medium | chr1    | 84517078  | 84517478  | Promoter (2-3kb)  | 1       | 84520115  | 84526076  | -2637         | ENSG00000122432 | SPATA1       |
| NR4A2_Medium | chr1    | 84683672  | 84684072  | Promoter (6-7kb)  | 1       | 84649630  | 84690289  | 6217          | ENSG00000117155 | SSX2IP       |
| NR4A2_Medium | chr1    | 85273051  | 85273451  | Promoter (2-3kb)  | 1       | 85267729  | 85275750  | 2299          | ENSG00000142867 | BCL10        |
| NR4A2_Medium | chr1    | 86562480  | 86562880  | Promoter (8-9kb)  | 1       | 86571116  | 86572956  | -8236         | ENSG00000166602 | CLCA4        |
| NR4A2_Medium | chr1    | 89112644  | 89113044  | Promoter (<=1kb)  | 1       | 89108117  | 89113050  | 6             | ENSG00000162645 | GBP2         |
| NR4A2_Medium | chr1    | 89133564  | 89133964  | Promoter (7-8kb)  | 1       | 89106132  | 89126114  | -7450         | ENSG00000162645 | GBP2         |
| NR4A2_Medium | chr1    | 90785980  | 90786380  | Promoter (3-4kb)  | 1       | 90782984  | 90789672  | 3292          | ENSG00000233593 | LINC02609    |
| NR4A2_Medium | chr1    | 90851277  | 90851677  | Promoter (<=1kb)  | 1       | 90769086  | 90851528  | 0             | ENSG00000233593 | LINC02609    |
| NR4A2_Medium | chr1    | 91359194  | 91359594  | Promoter (6-7kb)  | 1       | 91260766  | 91352637  | -6557         | ENSG00000162669 | HFM1         |
| NR4A2_Medium | chr1    | 91851492  | 91851892  | Promoter (9-10kb) | 1       | 91682430  | 91861593  | 9701          | ENSG00000069702 | TGFBR3       |
| NR4A2_Medium | chr1    | 92214287  | 92214687  | Promoter (3-4kb)  | 1       | 92217915  | 92245813  | -3228         | ENSG00000203910 | C1orf146     |
| NR4A2_Medium | chr1    | 93112813  | 93113213  | Promoter (2-3kb)  | 1       | 93110424  | 93133740  | 2389          | ENSG00000143033 | MTF2         |
| NR4A2_Medium | chr1    | 93355128  | 93355528  | Promoter (<=1kb)  | 1       | 93354975  | 93360935  | 153           | ENSG00000117505 | DR1          |
| NR4A2_Medium | chr1    | 93615232  | 93615632  | Promoter (1-2kb)  | 1       | 93561786  | 93614097  | -1135         | ENSG00000137936 | BCAR3        |
| NR4A2_Medium | chr1    | 94234974  | 94235374  | Promoter (2-3kb)  | 1       | 94168905  | 94237584  | 2210          | ENSG00000137962 | ARHGAP29     |
| NR4A2_Medium | chr1    | 96801538  | 96801938  | Promoter (4-5kb)  | 1       | 96806811  | 96812928  | -4873         | ENSG00000117569 | PTBP2        |
| NR4A2_Medium | chr1    | 100000426 | 100000826 | Promoter (6-7kb)  | 1       | 99993546  | 100023411 | 6880          | ENSG00000117620 | SLC35A3      |
| NR4A2_Medium | chr1    | 100346717 | 100347117 | Promoter (1-2kb)  | 1       | 100345038 | 100518253 | 1679          | ENSG00000079335 | CDC14A       |
| NR4A2_Medium | chr1    | 101836717 | 101837117 | Promoter (<=1kb)  | 1       | 101803486 | 101837029 | 0             | ENSG00000118733 | OLFM3        |
| NR4A2_Medium | chr1    | 101849815 | 101850215 | Promoter (2-3kb)  | 1       | 101803486 | 101846973 | -2842         | ENSG00000118733 | OLFM3        |
| NR4A2_Medium | chr1    | 103548942 | 103549342 | Promoter (2-3kb)  | 1       | 103546927 | 103551263 | 2015          | ENSG00000185946 | RNPC3        |
| NR4A2_Medium | chr1    | 104071854 | 104072254 | Promoter (<=1kb)  | 1       | 104072983 | 104126914 | -729          | ENSG00000215869 | LOC100129138 |
| NR4A2_Medium | chr1    | 105624950 | 105625350 | Promoter (5-6kb)  | 1       | 105602062 | 105618991 | -5959         | ENSG00000230768 | LINC01676    |
| NR4A2_Medium | chr1    | 106014359 | 106014759 | Promoter (8-9kb)  | 1       | 105927624 | 106023212 | 8453          | NA              | LINC01677    |
| NR4A2_Medium | chr1    | 106021524 | 106021924 | Promoter (1-2kb)  | 1       | 105927624 | 106023212 | 1288          | NA              | LINC01677    |
| NR4A2_Medium | chr1    | 107790542 | 107790942 | Promoter (4-5kb)  | 1       | 107573169 | 107785624 | -4918         | ENSG00000134215 | VAV3         |
| NR4A2_Medium | chr1    | 107958248 | 107958648 | Promoter (4-5kb)  | 1       | 107770659 | 107963500 | 4852          | ENSG00000134215 | VAV3         |
| NR4A2_Medium | chr1    | 108691682 | 108692082 | Promoter (<=1kb)  | 1       | 108692310 | 108702928 | -228          | ENSG00000134186 | PRPF38B      |
| NR4A2_Medium | chr1    | 108912641 | 108913041 | Promoter (1-2kb)  | 1       | 108914377 | 108924361 | -1336         | ENSG00000121957 | GPSM2        |
| NR4A2_Medium | chr1    | 109073701 | 109074101 | Promoter (1-2kb)  | 1       | 109062486 | 109075971 | 1870          | ENSG00000197780 | TAF13        |
| NR4A2_Medium | chr1    | 109469105 | 109469505 | Promoter (2-3kb)  | 1       | 109466546 | 109482134 | 2559          | ENSG00000143028 | SYPL2        |
| NR4A2_Medium | chr1    | 109739938 | 109740338 | Promoter (<=1kb)  | 1       | 109736930 | 109740327 | 0             | ENSG00000134202 | GSTM3        |
| NR4A2_Medium | chr1    | 109749100 | 109749500 | Promoter (2-3kb)  | 1       | 109750356 | 109751546 | 2046          | ENSG00000198758 | EPS8L3       |
| NR4A2_Medium | chr1    | 110077549 | 110077949 | Promoter (4-5kb)  | 1       | 110082688 | 110109719 | -4739         | ENSG00000258673 | LINC01397    |
| NR4A2_Medium | chr1    | 110199189 | 110199589 | Promoter (6-7kb)  | 1       | 110192568 | 110194988 | 6621          | ENSG00000197106 | SLC6A17      |
| NR4A2_Medium | chr1    | 111224680 | 111225080 | Promoter (1-2kb)  | 1       | 111227016 | 111236080 | -1936         | ENSG00000064886 | CHI3L2       |
| NR4A2_Medium | chr1    | 111247634 | 111248034 | Promoter (8-9kb)  | 1       | 111239306 | 111243438 | 8328          | ENSG00000064886 | CHI3L2       |
| NR4A2_Medium | chr1    | 111567398 | 111567798 | Promoter (3-4kb)  | 1       | 111483348 | 111563962 | -3436         | ENSG00000121933 | TMIGD        |

| Condition    | peakChr | peakStart | peakEnd   | annotation        | geneChr | geneStart | geneEnd   | distanceToTSS | geneID          | geneSymbol   |
|--------------|---------|-----------|-----------|-------------------|---------|-----------|-----------|---------------|-----------------|--------------|
| NR4A2_Medium | chr1    | 113944450 | 113944850 | Promoter (6-7kb)  | 1       | 113951145 | 113977804 | -6295         | ENSG00000163349 | HIPK1        |
| NR4A2_Medium | chr1    | 115028583 | 115028983 | Promoter (<=1kb)  | 1       | 115029824 | 115034309 | -841          | ENSG00000134200 | TSHB         |
| NR4A2_Medium | chr1    | 116416367 | 116416767 | Promoter (1-2kb)  | 1       | 116405509 | 116418536 | 1769          | ENSG00000203865 | ATP1A1-AS1   |
| NR4A2_Medium | chr1    | 117004290 | 117004690 | Promoter (2-3kb)  | 1       | 117001812 | 117036417 | 2478          | ENSG00000134256 | CD101        |
| NR4A2_Medium | chr1    | 117175371 | 117175771 | Promoter (2-3kb)  | 1       | 117143587 | 117173266 | -2105         | ENSG00000134258 | VTCN1        |
| NR4A2_Medium | chr1    | 117507749 | 117508149 | Promoter (4-5kb)  | 1       | 117502861 | 117525352 | 4888          | ENSG00000198162 | MAN1A2       |
| NR4A2_Medium | chr1    | 117879673 | 117880073 | Promoter (7-8kb)  | 1       | 117870184 | 117887733 | 7660          | ENSG00000196505 | GDAP2        |
| NR4A2_Medium | chr1    | 117985253 | 117985653 | Promoter (<=1kb)  | 1       | 117971780 | 117984748 | -505          | ENSG00000155761 | SPAG17       |
| NR4A2_Medium | chr1    | 118071093 | 118071493 | Promoter (9-10kb) | 1       | 118073941 | 118081296 | 9803          | ENSG00000155761 | SPAG17       |
| NR4A2_Medium | chr1    | 119420899 | 119421299 | Promoter (3-4kb)  | 1       | 119417413 | 119422023 | 3486          | ENSG00000203859 | HSD3B2       |
| NR4A2_Medium | chr1    | 119839647 | 119840047 | Promoter (4-5kb)  | 1       | 119834870 | 119844514 | 4467          | ENSG00000215864 | NBPF7        |
| NR4A2_Medium | chr1    | 119849997 | 119850397 | Promoter (5-6kb)  | 1       | 119834870 | 119844514 | -5483         | ENSG00000215864 | NBPF7        |
| NR4A2_Medium | chr1    | 121517348 | 121517748 | Promoter (1-2kb)  | 1       | 121519112 | 121571892 | -1364         | ENSG00000231752 | EMBP1        |
| NR4A2_Medium | chr1    | 143690726 | 143691126 | Promoter (8-9kb)  | 1       | 143699456 | 143699619 | 8493          | ENSG00000207349 | RNVU1-17     |
| NR4A2_Medium | chr1    | 145834947 | 145835347 | Promoter (1-2kb)  | 1       | 145836537 | 145840407 | -1190         | ENSG00000186141 | POLR3C       |
| NR4A2_Medium | chr1    | 145998402 | 145998802 | Promoter (1-2kb)  | 1       | 145992435 | 145996579 | -1823         | ENSG00000265972 | TXNIP        |
| NR4A2_Medium | chr1    | 145999672 | 146000072 | Promoter (3-4kb)  | 1       | 145992435 | 145996579 | -3093         | ENSG00000265972 | TXNIP        |
| NR4A2_Medium | chr1    | 146006462 | 146006862 | Promoter (9-10kb) | 1       | 145992435 | 145996579 | -9883         | ENSG00000265972 | TXNIP        |
| NR4A2_Medium | chr1    | 146016225 | 146016625 | Promoter (5-6kb)  | 1       | 146017468 | 146021734 | 5109          | ENSG00000168509 | HJV          |
| NR4A2_Medium | chr1    | 146385004 | 146385404 | Promoter (8-9kb)  | 1       | 146376807 | 146376970 | 8197          | ENSG00000206737 | RNVU1-18     |
| NR4A2_Medium | chr1    | 149903903 | 149904303 | Promoter (4-5kb)  | 1       | 149899626 | 149900548 | 4277          | ENSG00000178096 | BOLA1        |
| NR4A2_Medium | chr1    | 150174788 | 150175188 | Promoter (1-2kb)  | 1       | 150173049 | 150181429 | 1739          | NA              | LOC105371433 |
| NR4A2_Medium | chr1    | 150233009 | 150233409 | Promoter (1-2kb)  | 1       | 150218555 | 150234678 | 1269          | ENSG00000143401 | ANP32E       |
| NR4A2_Medium | chr1    | 150312252 | 150312652 | Promoter (8-9kb)  | 1       | 150321479 | 150335030 | -8827         | ENSG00000117360 | PRPF3        |
| NR4A2_Medium | chr1    | 150539531 | 150539931 | Promoter (9-10kb) | 1       | 150549369 | 150560932 | -9438         | ENSG00000143382 | ADAMTSL4     |
| NR4A2_Medium | chr1    | 150542213 | 150542613 | Promoter (6-7kb)  | 1       | 150549369 | 150560932 | -6756         | ENSG00000143382 | ADAMTSL4     |
| NR4A2_Medium | chr1    | 150701367 | 150701767 | Promoter (2-3kb)  | 1       | 150698391 | 150704307 | 2540          | ENSG00000143452 | HORMAD1      |
| NR4A2_Medium | chr1    | 150754188 | 150754588 | Promoter (2-3kb)  | 1       | 150732838 | 150751834 | -2354         | ENSG00000163131 | CTSS         |
| NR4A2_Medium | chr1    | 150805331 | 150805731 | Promoter (1-2kb)  | 1       | 150804012 | 150806768 | 1037          | ENSG00000143387 | CTSK         |
| NR4A2_Medium | chr1    | 151350635 | 151351035 | Promoter (3-4kb)  | 1       | 151341960 | 151347357 | -3278         | ENSG00000143390 | RFX5         |
| NR4A2_Medium | chr1    | 151433321 | 151433721 | Promoter (5-6kb)  | 1       | 151423522 | 151427980 | -5341         | ENSG00000143442 | POGZ         |
| NR4A2_Medium | chr1    | 151575245 | 151575645 | Promoter (9-10kb) | 1       | 151565922 | 151574927 | 9323          | ENSG00000143367 | TUFT1        |
| NR4A2_Medium | chr1    | 151663092 | 151663492 | Promoter (2-3kb)  | 1       | 151660384 | 151694484 | 2708          | ENSG00000143376 | SNX27        |
| NR4A2_Medium | chr1    | 151676166 | 151676566 | Promoter (<=1kb)  | 1       | 151675856 | 151694485 | 310           | ENSG00000143376 | SNX27        |
| NR4A2_Medium | chr1    | 151718373 | 151718773 | Promoter (1-2kb)  | 1       | 151700058 | 151716803 | -1570         | ENSG00000159409 | CELF3        |
| NR4A2_Medium | chr1    | 151826061 | 151826461 | Promoter (<=1kb)  | 1       | 151806071 | 151826096 | 0             | ENSG00000143365 | RORC         |
| NR4A2_Medium | chr1    | 152197224 | 152197624 | Promoter (7-8kb)  | 1       | 152189352 | 152365652 | 7872          | ENSG00000237975 | FLG-AS1      |
| NR4A2_Medium | chr1    | 152368371 | 152368771 | Promoter (8-9kb)  | 1       | 152348735 | 152360006 | -8365         | ENSG00000143520 | FLG2         |
| NR4A2_Medium | chr1    | 152696649 | 152697049 | Promoter (1-2kb)  | 1       | 152698345 | 152699442 | -1296         | ENSG00000187173 | LCE2A        |
| NR4A2_Medium | chr1    | 152968068 | 152968468 | Promoter (2-3kb)  | 1       | 152970648 | 152972574 | -2180         | ENSG00000184148 | SPRR4        |
| NR4A2_Medium | chr1    | 153378358 | 153378758 | Promoter (2-3kb)  | 1       | 153373711 | 153375621 | -2737         | ENSG00000163221 | S100A12      |
| NR4A2_Medium | chr1    | 153986970 | 153987370 | Promoter (<=1kb)  | 1       | 153982061 | 153986358 | -612          | ENSG00000143545 | RAB13        |
| NR4A2_Medium | chr1    | 154551033 | 154551433 | Promoter (<=1kb)  | 1       | 154551223 | 154551801 | 368           | ENSG00000160714 | UBE2Q1       |
| NR4A2_Medium | chr1    | 154580108 | 154580508 | Promoter (4-5kb)  | 1       | 154584634 | 154585418 | 4910          | ENSG00000160710 | ADAR         |
| NR4A2_Medium | chr1    | 155168812 | 155169212 | Promoter (3-4kb)  | 1       | 155169408 | 155172777 | 3565          | ENSG00000163463 | KRTCAP2      |
| NR4A2_Medium | chr1    | 155197079 | 155197479 | Promoter (<=1kb)  | 1       | 155195845 | 155197622 | 143           | ENSG00000169231 | THBS3        |
| NR4A2_Medium | chr1    | 155695351 | 155695751 | Promoter (6-7kb)  | 1       | 155689102 | 155729064 | 6249          | ENSG00000132676 | DAP3         |
| NR4A2_Medium | chr1    | 156005791 | 156006191 | Promoter (6-7kb)  | 1       | 156009049 | 156013040 | 6849          | ENSG00000163479 | SSR2         |
| NR4A2_Medium | chr1    | 156083671 | 156084071 | Promoter (1-2kb)  | 1       | 156082631 | 156093811 | 1040          | ENSG00000160789 | LMNA         |
| NR4A2_Medium | chr1    | 156262076 | 156262476 | Promoter (5-6kb)  | 1       | 156266137 | 156267588 | 5112          | ENSG00000198952 | SMG5         |
| NR4A2_Medium | chr1    | 156892780 | 156893180 | Promoter (<=1kb)  | 1       | 156893698 | 156906720 | -518          | ENSG00000187800 | PEAR1        |
| NR4A2_Medium | chr1    | 156928264 | 156928664 | Promoter (<=1kb)  | 1       | 156927362 | 156933085 | 902           | ENSG00000160838 | LRRC71       |
| NR4A2_Medium | chr1    | 157560500 | 157560900 | Promoter (7-8kb)  | 1       | 157513377 | 157552515 | -7985         | ENSG00000143297 | FCRL5        |
| NR4A2_Medium | chr1    | 157592530 | 157592930 | Promoter (3-4kb)  | 1       | 157574821 | 157589251 | -3279         | ENSG00000163518 | FCRL4        |
| NR4A2_Medium | chr1    | 158130750 | 158131150 | Promoter (9-10kb) | 1       | 158132046 | 158140650 | 9500          | ENSG00000231666 | LINC01704    |
| NR4A2_Medium | chr1    | 158321917 | 158322317 | Promoter (8-9kb)  | 1       | 158327951 | 158331025 | 8708          | ENSG00000158485 | CD1B         |
| NR4A2_Medium | chr1    | 158415897 | 158416297 | Promoter (4-5kb)  | 1       | 158419928 | 158420866 | 4569          | ENSG00000180708 | OR10K2       |
| NR4A2_Medium | chr1    | 159807760 | 159808160 | Promoter (5-6kb)  | 1       | 159802424 | 159815592 | 5336          | ENSG00000181036 | FCRL6        |
| NR4A2_Medium | chr1    | 159872345 | 159872745 | Promoter (<=1kb)  | 1       | 159857932 | 159873014 | 269           | ENSG00000243284 | VSIG8        |
| NR4A2_Medium | chr1    | 159890091 | 159890491 | Promoter (7-8kb)  | 1       | 159872366 | 159898269 | 7778          | ENSG00000213085 | CFAP45       |
| NR4A2_Medium | chr1    | 160194465 | 160194865 | Promoter (1-2kb)  | 1       | 160192638 | 160199053 | 1827          | ENSG00000143318 | CASQ1        |
| NR4A2_Medium | chr1    | 160211672 | 160212072 | Promoter (<=1kb)  | 1       | 160211287 | 160213717 | 385           | ENSG00000162734 | PEA15        |
| NR4A2_Medium | chr1    | 160228246 | 160228646 | Promoter (3-4kb)  | 1       | 160217486 | 160224528 | -3718         | ENSG00000132716 | DCAF8        |
| NR4A2_Medium | chr1    | 160530830 | 160531230 | Promoter (7-8kb)  | 1       | 160485030 | 160523262 | -7568         | ENSG00000162739 | SLAMF6       |
| NR4A2_Medium | chr1    | 160575516 | 160575916 | Promoter (3-4kb)  | 1       | 160541098 | 160579473 | 3557          | ENSG00000066294 | CD84         |
| NR4A2_Medium | chr1    | 160717311 | 160717711 | Promoter (5-6kb)  | 1       | 160680422 | 160711831 | -5480         | ENSG00000117091 | CD48         |
| NR4A2_Medium | chr1    | 161207809 | 161208209 | Promoter (1-2kb)  | 1       | 161209239 | 161214239 | -1030         | ENSG00000158864 | NDUFS2       |
| NR4A2_Medium | chr1    | 161253424 | 161253824 | Promoter (4-5kb)  | 1       | 161258745 | 161285450 | -4921         | ENSG00000248485 | PCP4L1       |
| NR4A2_Medium | chr1    | 161255581 | 161255981 | Promoter (2-3kb)  | 1       | 161258745 | 161285450 | -2764         | ENSG00000248485 | PCP4L1       |
| NR4A2_Medium | chr1    | 161717125 | 161717525 | Promoter (4-5kb)  | 1       | 161721563 | 161728143 | -4038         | ENSG00000162746 | FCRLB        |
| NR4A2_Medium | chr1    | 162417748 | 162418148 | Promoter (5-6kb)  | 1       | 162402477 | 162412138 | -5610         | ENSG00000198574 | SH2D1B       |
| NR4A2_Medium | chr1    | 163163916 | 163164316 | Promoter (2-3kb)  | 1       | 163161675 | 163213023 | 2241          | ENSG00000232892 | RGS5-AS1     |
| NR4A2_Medium | chr1    | 165541934 | 165542334 | Promoter (1-2kb)  | 1       | 165476838 | 165543758 | 1424          | ENSG00000237463 | LRRC52-AS1   |
| NR4A2_Medium | chr1    | 165892845 | 165893245 | Promoter (<=1kb)  | 1       | 165892652 | 165908100 | 193           | ENSG00000143179 | UCK2         |
| NR4A2_Medium | chr1    | 166995444 | 166995844 | Promoter (5-6kb)  | 1       | 166989925 | 167022214 | 5519          | ENSG00000143194 | MAEL         |
| NR4A2_Medium | chr1    | 167193476 | 167193876 | Promoter (1-2kb)  | 1       | 167176074 | 167195480 | 1604          | ENSG00000231605 | LINC01363    |
| NR4A2_Medium | chr1    | 168585124 | 168585524 | Promoter (8-9kb)  | 1       | 168576605 | 168582069 | 8519          | ENSG00000143184 | XCL1         |
| NR4A2_Medium | chr1    | 169114741 | 169115141 | Promoter (6-7kb)  | 1       | 169107907 | 169127399 | 6834          | ENSG00000143153 | ATP1B1       |
| NR4A2_Medium | chr1    | 169620499 | 169620899 | Promoter (1-2kb)  | 1       | 169588849 | 169619219 | -1280         | ENSG00000174175 | SELP         |
| NR4A2_Medium | chr1    | 169766984 | 169767384 | Promoter (2-3kb)  | 1       | 169733577 | 169764705 | -2279         | ENSG00000007908 | SELE         |
| NR4A2_Medium | chr1    | 170283739 | 170284139 | Promoter (<=1kb)  | 1       | 170271767 | 170284208 | 69            | ENSG00000224286 | LINC01142    |
| NR4A2_Medium | chr1    | 170737996 | 170738396 | Promoter (7-8kb)  | 1       | 170730446 | 170736233 | 7550          | ENSG00000116132 | PRRX1        |
| NR4A2_Medium | chr1    | 171560163 | 171560563 | Promoter (2-3kb)  | 1       | 171557955 | 171593258 | 2208          | ENSG00000117523 | PRRC2C       |
| NR4A2_Medium | chr1    | 171616088 | 171616488 | Promoter (5-6kb)  | 1       | 171622216 | 171627747 | -5728         | ENSG00000283683 | MYOCOS       |
| NR4A2_Medium | chr1    | 172453725 | 172454125 | Promoter (<=1kb)  | 1       | 172452893 | 172468831 | 832           | ENSG00000180999 | C1orf105     |
| NR4A2_Medium | chr1    | 173564396 | 173564796 | Promoter (8-9kb)  | 1       | 173521215 | 173556205 | -8191         | ENSG00000162753 | SLC9C2       |
| NR4A2_Medium | chr1    | 173661452 | 173661852 | Promoter (7-8kb)  | 1       | 173657626 | 173669832 | 7980          | ENSG00000183831 | ANKRD45      |
| NR4A2_Medium | chr1    | 174030801 | 174031201 | Promoter (8-9kb)  | 1       | 173931214 | 174022297 | -8504         | ENSG00000135870 | RC3H1        |
| NR4A2_Medium | chr1    | 174797388 | 174797788 | Promoter (2-3kb)  | 1       | 174799932 | 174995308 | -2144         | ENSG00000152061 | RABGAP1L     |
| NR4A2_Medium | chr1    | 174799759 | 174800159 | Promoter (<=1kb)  | 1       | 174799932 | 174995308 | 0             | ENSG00000152061 | RABGAP1L     |
| NR4A2_Medium | chr1    | 175412648 | 175413048 | Promoter (6-7kb)  | 1       | 175391428 | 175406364 | -6284         | ENSG00000116147 | TNR          |
| NR4A2_Medium | chr1    | 175875092 | 175875492 | Promoter (1-2kb)  | 1       | 175877343 | 175880468 | -1851         | ENSG00000224718 | LINC01657    |
| NR4A2_Medium | chr1    | 175937505 | 175937905 |                   |         |           |           |               |                 |              |



| Condition    | peakChr | peakStart | peakEnd   | annotation        | geneChr | geneStart | geneEnd   | distanceToTSS | geneID          | geneSymbol   |
|--------------|---------|-----------|-----------|-------------------|---------|-----------|-----------|---------------|-----------------|--------------|
| NR4A2_Medium | chr1    | 192310111 | 192310511 | Promoter (6-7kb)  | 1       | 192316992 | 192367285 | -6481         | ENSG00000253148 | RGS21        |
| NR4A2_Medium | chr1    | 193127533 | 193127933 | Promoter (4-5kb)  | 1       | 193122535 | 193141955 | 4998          | ENSG00000134371 | CDC73        |
| NR4A2_Medium | chr1    | 200870738 | 200871138 | Promoter (1-2kb)  | 1       | 200872981 | 200874178 | -1843         | ENSG00000170128 | GPR25        |
| NR4A2_Medium | chr1    | 201006762 | 201007162 | Promoter (1-2kb)  | 1       | 201001407 | 201005590 | -1172         | ENSG00000116852 | KIF21B       |
| NR4A2_Medium | chr1    | 201200877 | 201201277 | Promoter (3-4kb)  | 1       | 201205082 | 201206475 | -3805         | ENSG00000163395 | IGFN1        |
| NR4A2_Medium | chr1    | 201363834 | 201364234 | Promoter (<=1kb)  | 1       | 201359008 | 201364188 | 0             | ENSG00000118194 | TNNT2        |
| NR4A2_Medium | chr1    | 201499719 | 201500119 | Promoter (3-4kb)  | 1       | 201483979 | 201496573 | -3146         | ENSG00000159176 | CSRP1        |
| NR4A2_Medium | chr1    | 201641774 | 201642174 | Promoter (6-7kb)  | 1       | 201648249 | 201826969 | -6075         | ENSG00000134369 | NAV1         |
| NR4A2_Medium | chr1    | 202883097 | 202883497 | Promoter (5-6kb)  | 1       | 202878282 | 202889149 | 5652          | ENSG00000183155 | RABIF        |
| NR4A2_Medium | chr1    | 202925475 | 202925875 | Promoter (1-2kb)  | 1       | 202891120 | 202927234 | 1359          | ENSG00000117153 | KLHL12       |
| NR4A2_Medium | chr1    | 202976447 | 202976847 | Promoter (9-10kb) | 1       | 202965371 | 202967275 | -9172         | ENSG00000159348 | CYBR51       |
| NR4A2_Medium | chr1    | 203736618 | 203737018 | Promoter (7-8kb)  | 1       | 203729581 | 203729705 | 7037          | ENSG00000221643 | SNORA77      |
| NR4A2_Medium | chr1    | 203847296 | 203847696 | Promoter (2-3kb)  | 1       | 203850174 | 203851122 | -2478         | ENSG00000058673 | ZC3H11A      |
| NR4A2_Medium | chr1    | 203857764 | 203858164 | Promoter (3-4kb)  | 1       | 203861599 | 203871152 | -3435         | ENSG00000182004 | SNRPE        |
| NR4A2_Medium | chr1    | 204195026 | 204195426 | Promoter (1-2kb)  | 1       | 204190341 | 204196491 | 1065          | ENSG00000170498 | KISS1        |
| NR4A2_Medium | chr1    | 204280381 | 204280781 | Promoter (1-2kb)  | 1       | 204259258 | 204278389 | -1992         | ENSG00000143850 | PLEKHA6      |
| NR4A2_Medium | chr1    | 204350177 | 204350577 | Promoter (9-10kb) | 1       | 204221221 | 204359916 | 9339          | ENSG00000143850 | PLEKHA6      |
| NR4A2_Medium | chr1    | 204947668 | 204948068 | Promoter (2-3kb)  | 1       | 204950557 | 205018371 | -2489         | ENSG00000163531 | NFASC        |
| NR4A2_Medium | chr1    | 204976321 | 204976721 | Promoter (2-3kb)  | 1       | 204979388 | 204984329 | -2667         | ENSG00000163531 | NFASC        |
| NR4A2_Medium | chr1    | 205044169 | 205044569 | Promoter (<=1kb)  | 1       | 205043212 | 205078289 | 957           | ENSG00000184144 | CNTN2        |
| NR4A2_Medium | chr1    | 205074540 | 205074940 | Promoter (1-2kb)  | 1       | 205072991 | 205074042 | 1549          | ENSG00000184144 | CNTN2        |
| NR4A2_Medium | chr1    | 205082753 | 205083153 | Promoter (1-2kb)  | 1       | 205083129 | 205084460 | 1307          | ENSG00000174529 | TMEM81       |
| NR4A2_Medium | chr1    | 205218784 | 205219184 | Promoter (7-8kb)  | 1       | 205142505 | 205211702 | -7082         | ENSG00000133059 | DSTYK        |
| NR4A2_Medium | chr1    | 205410787 | 205411187 | Promoter (9-10kb) | 1       | 205381378 | 205420574 | 9387          | ENSG00000186007 | LEMD1        |
| NR4A2_Medium | chr1    | 205624393 | 205624793 | Promoter (<=1kb)  | 1       | 205620614 | 205625667 | 874           | ENSG00000158711 | ELK4         |
| NR4A2_Medium | chr1    | 205872962 | 205873362 | Promoter (9-10kb) | 1       | 205882421 | 205896072 | -9059         | NA              | LOC284581    |
| NR4A2_Medium | chr1    | 205896435 | 205896835 | Promoter (6-7kb)  | 1       | 205890047 | 205896072 | 6388          | NA              | LOC284581    |
| NR4A2_Medium | chr1    | 205936576 | 205936976 | Promoter (<=1kb)  | 1       | 205913048 | 205935822 | -754          | ENSG00000174502 | SLC26A9      |
| NR4A2_Medium | chr1    | 206045965 | 206046365 | Promoter (6-7kb)  | 1       | 206052845 | 206062257 | -6480         | ENSG00000263961 | RHEX         |
| NR4A2_Medium | chr1    | 206937818 | 206938218 | Promoter (1-2kb)  | 1       | 206937546 | 206939466 | 1248          | ENSG00000162896 | PIGR         |
| NR4A2_Medium | chr1    | 209673041 | 209673441 | Promoter (1-2kb)  | 1       | 209661364 | 209675247 | 1806          | ENSG00000227591 | HSD11B1-AS1  |
| NR4A2_Medium | chr1    | 209678476 | 209678876 | Promoter (3-4kb)  | 1       | 209675412 | 209676390 | 3064          | ENSG00000123689 | G0S2         |
| NR4A2_Medium | chr1    | 209718731 | 209719131 | Promoter (4-5kb)  | 1       | 209661366 | 209724125 | 4994          | ENSG00000227591 | HSD11B1-AS1  |
| NR4A2_Medium | chr1    | 211139644 | 211140044 | Promoter (5-6kb)  | 1       | 210678315 | 211134165 | -5479         | ENSG00000143473 | KCNH1        |
| NR4A2_Medium | chr1    | 211286194 | 211286594 | Promoter (2-3kb)  | 1       | 211289178 | 211313672 | -2584         | ENSG00000117625 | RCOR3        |
| NR4A2_Medium | chr1    | 211660096 | 211660496 | Promoter (7-8kb)  | 1       | 211652147 | 211654622 | 7949          | ENSG00000227764 | LINC01693    |
| NR4A2_Medium | chr1    | 211969509 | 211969909 | Promoter (<=1kb)  | 1       | 211966124 | 211968707 | -802          | ENSG00000143493 | INTS7        |
| NR4A2_Medium | chr1    | 212967292 | 212967692 | Promoter (<=1kb)  | 1       | 212966957 | 212972918 | 335           | ENSG00000143494 | VASH2        |
| NR4A2_Medium | chr1    | 214276497 | 214276897 | Promoter (4-5kb)  | 1       | 214281102 | 214337131 | -4205         | ENSG00000143499 | SMYD2        |
| NR4A2_Medium | chr1    | 214553919 | 214554319 | Promoter (1-2kb)  | 1       | 214464702 | 214552449 | -1470         | ENSG00000152104 | PTPN14       |
| NR4A2_Medium | chr1    | 215628704 | 215629104 | Promoter (9-10kb) | 1       | 215618705 | 215620203 | 9999          | ENSG00000136636 | KCTD3        |
| NR4A2_Medium | chr1    | 220118840 | 220119240 | Promoter (<=1kb)  | 1       | 220118157 | 220118241 | -599          | ENSG00000207624 | MIR194-1     |
| NR4A2_Medium | chr1    | 222599708 | 222600108 | Promoter (9-10kb) | 1       | 222590179 | 222593439 | 9529          | ENSG00000225265 | TAF1A-AS1    |
| NR4A2_Medium | chr1    | 222721111 | 222721511 | Promoter (7-8kb)  | 1       | 222713401 | 222727209 | 7710          | ENSG00000162819 | BROX         |
| NR4A2_Medium | chr1    | 223537461 | 223537861 | Promoter (5-6kb)  | 1       | 223538007 | 223543166 | 5305          | ENSG00000203697 | CAPN8        |
| NR4A2_Medium | chr1    | 223622924 | 223623324 | Promoter (5-6kb)  | 1       | 223622622 | 223628705 | 5381          | ENSG00000203697 | CAPN8        |
| NR4A2_Medium | chr1    | 223674627 | 223675027 | Promoter (8-9kb)  | 1       | 223615970 | 223665734 | -8893         | ENSG00000203697 | CAPN8        |
| NR4A2_Medium | chr1    | 224172206 | 224172606 | Promoter (3-4kb)  | 1       | 224175756 | 224192353 | -3150         | ENSG00000143753 | DEGS1        |
| NR4A2_Medium | chr1    | 224220653 | 224221053 | Promoter (1-2kb)  | 1       | 224219613 | 224228043 | 1040          | ENSG00000237101 | LOC101927164 |
| NR4A2_Medium | chr1    | 224273364 | 224273764 | Promoter (3-4kb)  | 1       | 224231266 | 224269915 | -3449         | ENSG00000143748 | NVL          |
| NR4A2_Medium | chr1    | 224903046 | 224903446 | Promoter (6-7kb)  | 1       | 224896262 | 225399269 | 6784          | ENSG00000185842 | DNAH14       |
| NR4A2_Medium | chr1    | 225835026 | 225835426 | Promoter (6-7kb)  | 1       | 225828843 | 225832163 | 6183          | ENSG00000143819 | EPHX1        |
| NR4A2_Medium | chr1    | 225853088 | 225853488 | Promoter (4-5kb)  | 1       | 225847139 | 225848988 | -4100         | ENSG00000196187 | TMEM63A      |
| NR4A2_Medium | chr1    | 225916822 | 225917222 | Promoter (4-5kb)  | 1       | 225921216 | 225921934 | 4712          | ENSG00000143811 | PYCR2        |
| NR4A2_Medium | chr1    | 226357738 | 226358138 | Promoter (4-5kb)  | 1       | 226361410 | 226362252 | 4114          | ENSG00000143799 | PARP1        |
| NR4A2_Medium | chr1    | 226388323 | 226388723 | Promoter (4-5kb)  | 1       | 226388698 | 226392792 | 4069          | ENSG00000143799 | PARP1        |
| NR4A2_Medium | chr1    | 226679985 | 226680385 | Promoter (4-5kb)  | 1       | 226656680 | 226675067 | -4918         | NA              | ITPKB-IT1    |
| NR4A2_Medium | chr1    | 226866952 | 226867352 | Promoter (2-3kb)  | 1       | 226870184 | 226881970 | -2832         | ENSG00000143801 | PSEN2        |
| NR4A2_Medium | chr1    | 226905309 | 226905709 | Promoter (7-8kb)  | 1       | 226897536 | 226987545 | 7773          | ENSG00000163050 | COQ8A        |
| NR4A2_Medium | chr1    | 227247083 | 227247483 | Promoter (6-7kb)  | 1       | 227199557 | 227254155 | 6672          | ENSG00000143776 | CDC42BPA     |
| NR4A2_Medium | chr1    | 227252893 | 227253293 | Promoter (<=1kb)  | 1       | 227199557 | 227254155 | 862           | ENSG00000143776 | CDC42BPA     |
| NR4A2_Medium | chr1    | 227559889 | 227560289 | Promoter (3-4kb)  | 1       | 227563543 | 227677443 | -3254         | ENSG00000181450 | ZNF678       |
| NR4A2_Medium | chr1    | 228069501 | 228069901 | Promoter (6-7kb)  | 1       | 228073909 | 228076550 | 6649          | ENSG00000276255 | LINC02809    |
| NR4A2_Medium | chr1    | 228070716 | 228071116 | Promoter (5-6kb)  | 1       | 228073909 | 228076550 | 5434          | ENSG00000276255 | LINC02809    |
| NR4A2_Medium | chr1    | 228071509 | 228071909 | Promoter (4-5kb)  | 1       | 228073909 | 228076550 | 4641          | ENSG00000276255 | LINC02809    |
| NR4A2_Medium | chr1    | 228275953 | 228276353 | Promoter (<=1kb)  | 1       | 228276134 | 228278014 | 0             | ENSG00000154358 | OBSCN        |
| NR4A2_Medium | chr1    | 228319467 | 228319867 | Promoter (9-10kb) | 1       | 228309484 | 228316119 | 9983          | ENSG00000154358 | OBSCN        |
| NR4A2_Medium | chr1    | 228622067 | 228622467 | Promoter (<=1kb)  | 1       | 228621447 | 228621565 | -502          | ENSG00000199352 | RNA5S1       |
| NR4A2_Medium | chr1    | 228644119 | 228644519 | Promoter (1-2kb)  | 1       | 228646040 | 228646158 | 1639          | ENSG00000199352 | RNA5S1       |
| NR4A2_Medium | chr1    | 229609638 | 229610038 | Promoter (4-5kb)  | 1       | 229593111 | 229614482 | 4444          | ENSG00000135801 | TAF5L        |
| NR4A2_Medium | chr1    | 229612894 | 229613294 | Promoter (1-2kb)  | 1       | 229593111 | 229614482 | 1188          | ENSG00000135801 | TAF5L        |
| NR4A2_Medium | chr1    | 229899445 | 229899845 | Promoter (7-8kb)  | 1       | 229875555 | 229892046 | -7399         | ENSG00000227043 | LINC01682    |
| NR4A2_Medium | chr1    | 230264669 | 230265069 | Promoter (2-3kb)  | 1       | 230261951 | 230264972 | 2718          | ENSG00000143641 | GALNT2       |
| NR4A2_Medium | chr1    | 230343427 | 230343827 | Promoter (7-8kb)  | 1       | 230323542 | 230336295 | -7132         | ENSG00000177614 | PGBD5        |
| NR4A2_Medium | chr1    | 230378154 | 230378554 | Promoter (<=1kb)  | 1       | 230323248 | 230377645 | -509          | ENSG00000177614 | PGBD5        |
| NR4A2_Medium | chr1    | 230972828 | 230973228 | Promoter (5-6kb)  | 1       | 230933783 | 230978796 | 5568          | ENSG00000143643 | TTC13        |
| NR4A2_Medium | chr1    | 231164566 | 231164966 | Promoter (1-2kb)  | 1       | 231162970 | 231217024 | 1596          | ENSG00000119283 | TRIM67       |
| NR4A2_Medium | chr1    | 231216359 | 231216759 | Promoter (9-10kb) | 1       | 231224315 | 231225922 | 9163          | ENSG00000143633 | C1orf131     |
| NR4A2_Medium | chr1    | 231429771 | 231430171 | Promoter (7-8kb)  | 1       | 231363756 | 231422287 | -7484         | ENSG00000135766 | EGLN1        |
| NR4A2_Medium | chr1    | 232991892 | 232992292 | Promoter (6-7kb)  | 1       | 232984135 | 232985884 | -6008         | ENSG00000135749 | PCNX2        |
| NR4A2_Medium | chr1    | 233130464 | 233130864 | Promoter (4-5kb)  | 1       | 233089851 | 233135188 | 4324          | ENSG00000135749 | PCNX2        |
| NR4A2_Medium | chr1    | 233208633 | 233209033 | Promoter (8-9kb)  | 1       | 232984136 | 233200191 | -8442         | ENSG00000135749 | PCNX2        |
| NR4A2_Medium | chr1    | 234642018 | 234642418 | Promoter (3-4kb)  | 1       | 234646289 | 234660924 | -3871         | ENSG00000228044 | LOC101927787 |
| NR4A2_Medium | chr1    | 234757361 | 234757761 | Promoter (2-3kb)  | 1       | 234757619 | 234760056 | 2295          | ENSG00000279261 | PP2672       |
| NR4A2_Medium | chr1    | 235158905 | 235159305 | Promoter (1-2kb)  | 1       | 235155088 | 235160962 | 1657          | ENSG00000188739 | RBM34        |
| NR4A2_Medium | chr1    | 235587440 | 235587840 | Promoter (1-2kb)  | 1       | 235551754 | 235588959 | 1119          | ENSG00000168243 | GNG4         |
| NR4A2_Medium | chr1    | 236685578 | 236685978 | Promoter (<=1kb)  | 1       | 236686454 | 236762943 | -476          | ENSG00000077522 | ACTN2        |
| NR4A2_Medium | chr1    | 237041913 | 237042313 | Promoter (<=1kb)  | 1       | 237042184 | 237833988 | 0             | ENSG00000198626 | RYR2         |
| NR4A2_Medium | chr1    | 237480131 | 237480531 | Promoter (9-10kb) | 1       | 237471119 | 237471191 | 9012          | ENSG00000266262 | MIR4428      |
| NR4A2_Medium | chr1    | 237837323 | 237837723 | Promoter (7-8kb)  | 1       | 237830032 | 237832702 | 7291          | ENSG00000198626 | RYR2         |
| NR4A2_Medium | chr1    | 242439814 | 242440214 | Promoter (9-10kb) | 1       | 242265337 | 242449425 | 9211          | ENSG00000180287 | PLD5         |
| NR4A2_Medium | chr1    | 244609499 | 244609899 | Promoter (7-8kb)  | 1       | 244617590 | 244636746 | -7691         | ENSG00000179397 | CATSPERE     |
| NR4A2_Medium | chr1    | 244663202 | 244663602 | Promoter (9-1     |         |           |           |               |                 |              |

| Condition    | peakChr | peakStart | peakEnd  | annotation        | geneChr | geneStart | geneEnd  | distanceToTSS | geneID          | geneSymbol   |
|--------------|---------|-----------|----------|-------------------|---------|-----------|----------|---------------|-----------------|--------------|
| NR4A2_Medium | chr2    | 2332140   | 2332540  | Promoter (<=1kb)  | 2       | 2302965   | 2331664  | -476          | ENSG00000186487 | MYT1L        |
| NR4A2_Medium | chr2    | 3560231   | 3560631  | Promoter (1-2kb)  | 2       | 3558628   | 3561734  | 1603          | ENSG00000234171 | RNASEH1-AS1  |
| NR4A2_Medium | chr2    | 7387982   | 7388382  | Promoter (4-5kb)  | 2       | 7383227   | 7429427  | 4755          | ENSG00000229727 | LOC100506274 |
| NR4A2_Medium | chr2    | 9613221   | 9613621  | Promoter (7-8kb)  | 2       | 9585081   | 9620701  | 7080          | ENSG00000134308 | YWHAQ        |
| NR4A2_Medium | chr2    | 9953990   | 9954390  | Promoter (2-3kb)  | 2       | 9951782   | 10000832 | 2208          | ENSG00000134317 | GRHL1        |
| NR4A2_Medium | chr2    | 10137980  | 10138380 | Promoter (3-4kb)  | 2       | 10141382  | 10211725 | -3002         | NA              | NA           |
| NR4A2_Medium | chr2    | 10190102  | 10190502 | Promoter (2-3kb)  | 2       | 10192614  | 10192671 | 2169          | ENSG00000265418 | MIR4261      |
| NR4A2_Medium | chr2    | 10312345  | 10312745 | Promoter (8-9kb)  | 2       | 10303700  | 10427617 | 8645          | ENSG00000115756 | HPCAL1       |
| NR4A2_Medium | chr2    | 10324274  | 10324674 | Promoter (<=1kb)  | 2       | 10324347  | 10427352 | 0             | ENSG00000115756 | HPCAL1       |
| NR4A2_Medium | chr2    | 10429678  | 10430078 | Promoter (9-10kb) | 2       | 10420021  | 10427000 | 9657          | ENSG00000115756 | HPCAL1       |
| NR4A2_Medium | chr2    | 11539227  | 11539627 | Promoter (<=1kb)  | 2       | 11539843  | 11588243 | -216          | ENSG00000196208 | GREB1        |
| NR4A2_Medium | chr2    | 15246775  | 15247175 | Promoter (8-9kb)  | 2       | 15166914  | 15238686 | -8089         | ENSG00000151779 | NBAS         |
| NR4A2_Medium | chr2    | 17747203  | 17747603 | Promoter (<=1kb)  | 2       | 17716750  | 17746412 | -791          | ENSG00000163029 | SMC6         |
| NR4A2_Medium | chr2    | 17875820  | 17876220 | Promoter (1-2kb)  | 2       | 17877847  | 17932954 | -1627         | ENSG00000170745 | KCNS3        |
| NR4A2_Medium | chr2    | 20218322  | 20218722 | Promoter (4-5kb)  | 2       | 20204002  | 20223388 | 4666          | ENSG00000115884 | SDC1         |
| NR4A2_Medium | chr2    | 20340423  | 20340823 | Promoter (9-10kb) | 2       | 20312299  | 20350301 | 9478          | ENSG00000055917 | PUM2         |
| NR4A2_Medium | chr2    | 20594925  | 20595325 | Promoter (2-3kb)  | 2       | 20590775  | 20592548 | -2377         | ENSG00000231948 | HS1BP3-IT1   |
| NR4A2_Medium | chr2    | 20657308  | 20657708 | Promoter (6-7kb)  | 2       | 20612297  | 20651130 | -6178         | ENSG00000118960 | HS1BP3       |
| NR4A2_Medium | chr2    | 22545215  | 22545615 | Promoter (8-9kb)  | 2       | 22536412  | 22548800 | 8803          | ENSG00000233587 | LINC01884    |
| NR4A2_Medium | chr2    | 23932618  | 23933018 | Promoter (5-6kb)  | 2       | 23927312  | 24000203 | 5306          | ENSG00000173960 | UBXN2A       |
| NR4A2_Medium | chr2    | 23977341  | 23977741 | Promoter (5-6kb)  | 2       | 23971364  | 23977320 | 5977          | ENSG00000173960 | UBXN2A       |
| NR4A2_Medium | chr2    | 24045431  | 24045831 | Promoter (1-2kb)  | 2       | 24029347  | 24047361 | 1530          | ENSG00000163026 | WDCP         |
| NR4A2_Medium | chr2    | 24357810  | 24358210 | Promoter (2-3kb)  | 2       | 24202864  | 24360309 | 2099          | ENSG00000198399 | ITSN2        |
| NR4A2_Medium | chr2    | 24709120  | 24709520 | Promoter (1-2kb)  | 2       | 24707727  | 24711483 | 1393          | ENSG00000084676 | NCOA1        |
| NR4A2_Medium | chr2    | 24760074  | 24760474 | Promoter (7-8kb)  | 2       | 24767771  | 24768388 | -7297         | ENSG00000084676 | NCOA1        |
| NR4A2_Medium | chr2    | 24787207  | 24787607 | Promoter (3-4kb)  | 2       | 24790263  | 24791606 | 3999          | ENSG00000184924 | PTRHD1       |
| NR4A2_Medium | chr2    | 24839994  | 24840394 | Promoter (<=1kb)  | 2       | 24834926  | 24840603 | 209           | ENSG00000138031 | ADCY3        |
| NR4A2_Medium | chr2    | 25233251  | 25233651 | Promoter (8-9kb)  | 2       | 25236974  | 25242015 | 8364          | ENSG00000119772 | DNMT3A       |
| NR4A2_Medium | chr2    | 25234948  | 25235348 | Promoter (6-7kb)  | 2       | 25236974  | 25242015 | 6667          | ENSG00000119772 | DNMT3A       |
| NR4A2_Medium | chr2    | 26028924  | 26029324 | Promoter (4-5kb)  | 2       | 26034084  | 26137454 | -4760         | ENSG00000084733 | RAB10        |
| NR4A2_Medium | chr2    | 26348447  | 26348847 | Promoter (1-2kb)  | 2       | 26308512  | 26346817 | -1630         | ENSG00000173567 | ADGRF3       |
| NR4A2_Medium | chr2    | 26487751  | 26488151 | Promoter (9-10kb) | 2       | 26457203  | 26478042 | -9709         | ENSG00000115155 | OTOF         |
| NR4A2_Medium | chr2    | 26622684  | 26623084 | Promoter (<=1kb)  | 2       | 26581340  | 26623627 | 543           | ENSG00000157884 | CIB4         |
| NR4A2_Medium | chr2    | 26700341  | 26700741 | Promoter (7-8kb)  | 2       | 26692722  | 26733420 | 7619          | ENSG00000171303 | KCNK3        |
| NR4A2_Medium | chr2    | 27046143  | 27046543 | Promoter (3-4kb)  | 2       | 27042364  | 27053154 | 3779          | ENSG00000084693 | AGBL5        |
| NR4A2_Medium | chr2    | 27224335  | 27224735 | Promoter (1-2kb)  | 2       | 27226224  | 27231572 | -1489         | ENSG00000084774 | CAD          |
| NR4A2_Medium | chr2    | 27345987  | 27346387 | Promoter (2-3kb)  | 2       | 27333605  | 27343632 | -2355         | ENSG00000115207 | GTF3C2       |
| NR4A2_Medium | chr2    | 27368047  | 27368447 | Promoter (<=1kb)  | 2       | 27366763  | 27368727 | 280           | ENSG00000115211 | EIF2B4       |
| NR4A2_Medium | chr2    | 27415338  | 27415738 | Promoter (5-6kb)  | 2       | 27381199  | 27409591 | -5747         | ENSG00000115241 | PPM1G        |
| NR4A2_Medium | chr2    | 27504819  | 27505219 | Promoter (1-2kb)  | 2       | 27506510  | 27509791 | -1291         | ENSG00000084734 | GCKR         |
| NR4A2_Medium | chr2    | 27836890  | 27837290 | Promoter (5-6kb)  | 2       | 27809687  | 27843161 | 5871          | ENSG00000171174 | RBKS         |
| NR4A2_Medium | chr2    | 28562939  | 28563339 | Promoter (3-4kb)  | 2       | 28566443  | 28578147 | -3104         | ENSG00000163803 | PLB1         |
| NR4A2_Medium | chr2    | 29220172  | 29220572 | Promoter (2-3kb)  | 2       | 29220870  | 29223394 | 2822          | ENSG00000171094 | ALK          |
| NR4A2_Medium | chr2    | 30231515  | 30231915 | Promoter (<=1kb)  | 2       | 30231534  | 30260028 | 0             | ENSG00000213626 | LBH          |
| NR4A2_Medium | chr2    | 31374556  | 31374956 | Promoter (9-10kb) | 2       | 31383082  | 31384395 | 9439          | ENSG00000158125 | XDH          |
| NR4A2_Medium | chr2    | 31802952  | 31803352 | Promoter (<=1kb)  | 2       | 31793823  | 31803980 | 628           | ENSG00000223647 | LINC01946    |
| NR4A2_Medium | chr2    | 33131093  | 33131493 | Promoter (2-3kb)  | 2       | 33134406  | 33188676 | -2913         | ENSG00000049323 | LTPB1        |
| NR4A2_Medium | chr2    | 33546774  | 33547174 | Promoter (7-8kb)  | 2       | 33539651  | 33543627 | 7123          | ENSG00000152689 | RASGRP3      |
| NR4A2_Medium | chr2    | 33556150  | 33556550 | Promoter (6-7kb)  | 2       | 33555047  | 33563547 | 6997          | NA              | RASGRP3-AS1  |
| NR4A2_Medium | chr2    | 36646361  | 36646761 | Promoter (<=1kb)  | 2       | 36555688  | 36646087 | -274          | ENSG00000171055 | FEZ2         |
| NR4A2_Medium | chr2    | 36900845  | 36901245 | Promoter (1-2kb)  | 2       | 36869703  | 36902928 | 1683          | ENSG00000115808 | STRN         |
| NR4A2_Medium | chr2    | 37152558  | 37152958 | Promoter (3-4kb)  | 2       | 37101935  | 37148988 | -3570         | ENSG00000055332 | EIF2AK2      |
| NR4A2_Medium | chr2    | 37653411  | 37653811 | Promoter (5-6kb)  | 2       | 37646546  | 37647658 | -5753         | ENSG00000163171 | CDC42EP3     |
| NR4A2_Medium | chr2    | 37942125  | 37942525 | Promoter (7-8kb)  | 2       | 37950432  | 38017558 | -7907         | ENSG00000115841 | RMDN2        |
| NR4A2_Medium | chr2    | 37943363  | 37943763 | Promoter (6-7kb)  | 2       | 37950432  | 38017558 | -6669         | ENSG00000115841 | RMDN2        |
| NR4A2_Medium | chr2    | 38519617  | 38520017 | Promoter (3-4kb)  | 2       | 38458637  | 38515934 | -3683         | ENSG00000231367 | LINC02613    |
| NR4A2_Medium | chr2    | 38572516  | 38572916 | Promoter (2-3kb)  | 2       | 38568079  | 38569836 | -2680         | ENSG00000143889 | HNRNPLL      |
| NR4A2_Medium | chr2    | 38799502  | 38799902 | Promoter (3-4kb)  | 2       | 38798352  | 38803023 | 3121          | ENSG00000163214 | DHX57        |
| NR4A2_Medium | chr2    | 38803027  | 38803427 | Promoter (<=1kb)  | 2       | 38798352  | 38803023 | -4            | ENSG00000163214 | DHX57        |
| NR4A2_Medium | chr2    | 38955153  | 38955553 | Promoter (2-3kb)  | 2       | 38957910  | 38973943 | -2357         | ENSG00000214694 | ARHGFEF33    |
| NR4A2_Medium | chr2    | 39134247  | 39134647 | Promoter (9-10kb) | 2       | 39056733  | 39124345 | -9902         | ENSG00000115904 | SOS1         |
| NR4A2_Medium | chr2    | 39187850  | 39188250 | Promoter (<=1kb)  | 2       | 39175646  | 39187707 | -143          | ENSG00000205111 | CDKL4        |
| NR4A2_Medium | chr2    | 40220891  | 40221291 | Promoter (<=1kb)  | 2       | 40220143  | 40254763 | 748           | ENSG00000227028 | SLC8A1-AS1   |
| NR4A2_Medium | chr2    | 40447775  | 40448175 | Promoter (3-4kb)  | 2       | 40430061  | 40452008 | 3833          | ENSG00000183023 | SC8A1        |
| NR4A2_Medium | chr2    | 41946234  | 41946634 | Promoter (6-7kb)  | 2       | 41938603  | 41953295 | 6661          | ENSG00000205086 | C2orf91      |
| NR4A2_Medium | chr2    | 42174787  | 42175187 | Promoter (4-5kb)  | 2       | 42169446  | 42170301 | -4486         | NA              | EML4-AS1     |
| NR4A2_Medium | chr2    | 42388359  | 42388759 | Promoter (<=1kb)  | 2       | 42350941  | 42388507 | 0             | ENSG00000115944 | COX7A2L      |
| NR4A2_Medium | chr2    | 42560361  | 42560761 | Promoter (7-8kb)  | 2       | 42568045  | 42756947 | -7284         | ENSG00000057935 | MTA3         |
| NR4A2_Medium | chr2    | 42654591  | 42654991 | Promoter (4-5kb)  | 2       | 42659520  | 42682706 | -4529         | ENSG00000057935 | MTA3         |
| NR4A2_Medium | chr2    | 42760918  | 42761318 | Promoter (2-3kb)  | 2       | 42762481  | 42764261 | 2943          | ENSG00000162881 | OXER1        |
| NR4A2_Medium | chr2    | 43219089  | 43219489 | Promoter (7-8kb)  | 2       | 43222402  | 43226606 | 7117          | ENSG00000152518 | ZFP36L2      |
| NR4A2_Medium | chr2    | 43466427  | 43466827 | Promoter (3-4kb)  | 2       | 43344157  | 43463259 | -3168         | ENSG00000115970 | THADA        |
| NR4A2_Medium | chr2    | 43550078  | 43550478 | Promoter (8-9kb)  | 2       | 43505718  | 43541303 | -8775         | ENSG00000115970 | THADA        |
| NR4A2_Medium | chr2    | 44933730  | 44934130 | Promoter (1-2kb)  | 2       | 44929977  | 44935359 | 1229          | ENSG00000259439 | LINC01833    |
| NR4A2_Medium | chr2    | 45672122  | 45672522 | Promoter (3-4kb)  | 2       | 45675619  | 45980356 | -3097         | ENSG00000171132 | PRKCE        |
| NR4A2_Medium | chr2    | 46442349  | 46442749 | Promoter (5-6kb)  | 2       | 46436473  | 46441832 | 5876          | ENSG00000187600 | LINC02583    |
| NR4A2_Medium | chr2    | 47177179  | 47177579 | Promoter (<=1kb)  | 2       | 47160170  | 47176921 | -258          | ENSG00000143933 | CALM2        |
| NR4A2_Medium | chr2    | 47569128  | 47569528 | Promoter (<=1kb)  | 2       | 47543344  | 47570315 | 787           | ENSG00000184261 | KCNK12       |
| NR4A2_Medium | chr2    | 48615269  | 48615669 | Promoter (2-3kb)  | 2       | 48617798  | 48646660 | -2129         | ENSG00000242441 | GTF2A1L      |
| NR4A2_Medium | chr2    | 50411282  | 50411682 | Promoter (5-6kb)  | 2       | 49921995  | 50417255 | 5573          | ENSG00000179915 | NRXN1        |
| NR4A2_Medium | chr2    | 50515259  | 50515659 | Promoter (8-9kb)  | 2       | 50497671  | 50506940 | -8319         | ENSG00000179915 | NRXN1        |
| NR4A2_Medium | chr2    | 53789375  | 53789775 | Promoter (1-2kb)  | 2       | 53756871  | 53787610 | -1765         | ENSG00000115239 | GPR75-ASB3   |
| NR4A2_Medium | chr2    | 54328015  | 54328415 | Promoter (1-2kb)  | 2       | 54330034  | 54360350 | -1619         | ENSG00000177994 | C2orf73      |
| NR4A2_Medium | chr2    | 56090233  | 56090633 | Promoter (<=1kb)  | 2       | 56077417  | 56090382 | 0             | NA              | LINC01813    |
| NR4A2_Medium | chr2    | 60482505  | 60482905 | Promoter (1-2kb)  | 2       | 60452649  | 60484465 | 1560          | ENSG00000119866 | BCL11A       |
| NR4A2_Medium | chr2    | 60553198  | 60553598 | Promoter (<=1kb)  | 2       | 60451146  | 60553571 | 0             | ENSG00000119866 | BCL11A       |
| NR4A2_Medium | chr2    | 61079684  | 61080084 | Promoter (8-9kb)  | 2       | 61071658  | 61075173 | 8026          | ENSG00000162929 | KIAA1841     |
| NR4A2_Medium | chr2    | 61353838  | 61354238 | Promoter (5-6kb)  | 2       | 61339575  | 61348028 | -5810         | ENSG00000115464 | USP34        |
| NR4A2_Medium | chr2    | 61863103  | 61863503 | Promoter (8-9kb)  | 2       | 61824856  | 61854143 | -8960         | ENSG00000170264 | FAM161A      |
| NR4A2_Medium | chr2    | 63615591  | 63615991 | Promoter (9-10kb) | 2       | 63605810  | 63607194 | 9781          | ENSG00000014641 | MDH1         |
| NR4A2_Medium | chr2    | 63925109  | 63925509 | Promoter (5-6kb)  | 2       | 63893072  | 63919930 | -5179         | ENSG00000143952 | VPS54        |
| NR4A2_Medium | chr2    | 64020941  | 64021341 | Promoter (1-2kb)  | 2       | 63892150  | 64019428 | -1513         | ENSG00000143952 | VPS54        |
| NR4A2_Medium | chr2    | 65068297  | 65068697 | Promoter (2-3kb)  | 2       | 65070729  | 65074484 | -2032         | ENSG00000011523 | CEP68        |
| NR4A2_Medium | chr2    | 65432017  | 65432417 | Promoter (<=1kb)  | 2       | 65310851  | 65432599 | 182           | ENSG00000198369 | SPRED2       |
| NR4A2_Medium | chr2    | 66499469  | 66499869 | Promoter (3-4kb)  | 2       | 66496026  | 66571251 | 3443          | ENSG00000143995 | MEIS1        |
| NR4A2_Medium | chr2    | 67834815  | 67835215 | Promoter (9-10kb) | 2       | 67796054  | 67825562 |               |                 |              |



| Condition    | peakChr | peakStart | peakEnd   | annotation        | geneChr | geneStart | geneEnd   | distanceToTSS | geneID          | geneSymbol  |
|--------------|---------|-----------|-----------|-------------------|---------|-----------|-----------|---------------|-----------------|-------------|
| NR4A2_Medium | chr2    | 72157688  | 72158088  | Promoter (9-10kb) | 2       | 72129238  | 72148038  | -9650         | ENSG00000003137 | CYP26B1     |
| NR4A2_Medium | chr2    | 72985117  | 72985517  | Promoter (2-3kb)  | 2       | 72944740  | 72988348  | 2831          | ENSG00000144040 | SFXN5       |
| NR4A2_Medium | chr2    | 73014265  | 73014665  | Promoter (6-7kb)  | 2       | 72968447  | 73020839  | 6174          | ENSG00000144040 | SFXN5       |
| NR4A2_Medium | chr2    | 73380715  | 73381115  | Promoter (4-5kb)  | 2       | 73385758  | 73609715  | -4643         | ENSG00000116127 | ALMS1       |
| NR4A2_Medium | chr2    | 73457780  | 73458180  | Promoter (1-2kb)  | 2       | 73456764  | 73459482  | 1016          | ENSG00000230002 | ALMS1-IT1   |
| NR4A2_Medium | chr2    | 73646692  | 73647092  | Promoter (1-2kb)  | 2       | 73644919  | 73685576  | 1773          | ENSG00000163016 | ALMS1P1     |
| NR4A2_Medium | chr2    | 74173180  | 74173580  | Promoter (4-5kb)  | 2       | 74159109  | 74178314  | 4734          | ENSG00000114978 | MOB1A       |
| NR4A2_Medium | chr2    | 74478976  | 74479376  | Promoter (1-2kb)  | 2       | 74475336  | 74481257  | 1881          | ENSG00000135637 | CCDC142     |
| NR4A2_Medium | chr2    | 74491083  | 74491483  | Promoter (<=1kb)  | 2       | 74491570  | 74492813  | -87           | ENSG00000115282 | TTC31       |
| NR4A2_Medium | chr2    | 74656604  | 74657004  | Promoter (2-3kb)  | 2       | 74654362  | 74680746  | 2242          | ENSG00000135622 | SEMA4F      |
| NR4A2_Medium | chr2    | 74920225  | 74920625  | Promoter (2-3kb)  | 2       | 74918148  | 74932794  | 2077          | ENSG00000204792 | LINC01291   |
| NR4A2_Medium | chr2    | 79084581  | 79084981  | Promoter (1-2kb)  | 2       | 79085030  | 79086847  | 1866          | ENSG00000172023 | REG1B       |
| NR4A2_Medium | chr2    | 79864615  | 79865015  | Promoter (1-2kb)  | 2       | 79866495  | 79866583  | 1568          | ENSG00000276917 | MIR8080     |
| NR4A2_Medium | chr2    | 84913198  | 84913598  | Promoter (6-7kb)  | 2       | 84870589  | 84907008  | -6190         | ENSG00000186854 | TRABD2A     |
| NR4A2_Medium | chr2    | 85382782  | 85383182  | Promoter (5-6kb)  | 2       | 85376882  | 85390995  | 5900          | ENSG00000115459 | ELMOD3      |
| NR4A2_Medium | chr2    | 85395316  | 85395716  | Promoter (2-3kb)  | 2       | 85394895  | 85398352  | 2636          | ENSG00000042493 | CAPG        |
| NR4A2_Medium | chr2    | 86034317  | 86034717  | Promoter (2-3kb)  | 2       | 86031421  | 86037070  | 2353          | ENSG00000068654 | POLR1A      |
| NR4A2_Medium | chr2    | 86765434  | 86765834  | Promoter (<=1kb)  | 2       | 86765513  | 86773425  | 0             | ENSG00000153561 | RMND5A      |
| NR4A2_Medium | chr2    | 88514506  | 88514906  | Promoter (9-10kb) | 2       | 88524649  | 88529585  | -9743         | ENSG00000172073 | TEX37       |
| NR4A2_Medium | chr2    | 91782889  | 91783289  | Promoter (6-7kb)  | 2       | 91775944  | 91781169  | 6945          | NA              | GGT8P       |
| NR4A2_Medium | chr2    | 94217115  | 94217515  | Promoter (8-9kb)  | 2       | 94195806  | 94208379  | -8736         | NA              | BMS1P14     |
| NR4A2_Medium | chr2    | 94860020  | 94860420  | Promoter (2-3kb)  | 2       | 94791103  | 94857282  | -2738         | ENSG00000229089 | ANKRD20A8P  |
| NR4A2_Medium | chr2    | 95168021  | 95168421  | Promoter (2-3kb)  | 2       | 95165817  | 95182171  | 2204          | ENSG00000275111 | ZNF2        |
| NR4A2_Medium | chr2    | 95275969  | 95276369  | Promoter (<=1kb)  | 2       | 95274979  | 95276092  | 990           | ENSG00000155066 | PROM2       |
| NR4A2_Medium | chr2    | 95279087  | 95279487  | Promoter (<=1kb)  | 2       | 95279866  | 95286539  | -379          | ENSG00000155066 | PROM2       |
| NR4A2_Medium | chr2    | 95296963  | 95297363  | Promoter (<=1kb)  | 2       | 95297327  | 95299120  | 0             | ENSG00000115041 | KCNIP3      |
| NR4A2_Medium | chr2    | 96108683  | 96109083  | Promoter (7-8kb)  | 2       | 96112876  | 96116571  | 7488          | ENSG00000274286 | ADRA2B      |
| NR4A2_Medium | chr2    | 96340562  | 96340962  | Promoter (4-5kb)  | 2       | 96335818  | 96373815  | 4744          | ENSG00000121152 | NCAPH       |
| NR4A2_Medium | chr2    | 96669431  | 96669831  | Promoter (<=1kb)  | 2       | 96670218  | 96704885  | -387          | ENSG00000249715 | FER1L5      |
| NR4A2_Medium | chr2    | 97659580  | 97659980  | Promoter (<=1kb)  | 2       | 97658814  | 97659891  | 0             | ENSG00000115073 | ACTR1B      |
| NR4A2_Medium | chr2    | 97661684  | 97662084  | Promoter (1-2kb)  | 2       | 97658814  | 97659891  | -1793         | ENSG00000115073 | ACTR1B      |
| NR4A2_Medium | chr2    | 97673160  | 97673560  | Promoter (<=1kb)  | 2       | 97674203  | 97675928  | -643          | ENSG00000228486 | C2orf92     |
| NR4A2_Medium | chr2    | 97721442  | 97721842  | Promoter (2-3kb)  | 2       | 97724461  | 97739862  | -2619         | ENSG00000115085 | ZAP70       |
| NR4A2_Medium | chr2    | 97986269  | 97986669  | Promoter (8-9kb)  | 2       | 97814349  | 97995544  | 8875          | ENSG00000075568 | TMEM131     |
| NR4A2_Medium | chr2    | 98451834  | 98452234  | Promoter (6-7kb)  | 2       | 98444950  | 98581821  | 6884          | ENSG00000040933 | INPP4A      |
| NR4A2_Medium | chr2    | 98716298  | 98716698  | Promoter (9-10kb) | 2       | 98619106  | 98726696  | 9998          | ENSG00000071073 | MGAT4A      |
| NR4A2_Medium | chr2    | 98725406  | 98725806  | Promoter (<=1kb)  | 2       | 98619106  | 98726696  | 890           | ENSG00000071073 | MGAT4A      |
| NR4A2_Medium | chr2    | 100016256 | 100016656 | Promoter (8-9kb)  | 2       | 100006149 | 100007951 | -8305         | ENSG00000144218 | AFF3        |
| NR4A2_Medium | chr2    | 100306553 | 100306953 | Promoter (2-3kb)  | 2       | 100283542 | 100309505 | 2552          | ENSG00000170500 | LONRF2      |
| NR4A2_Medium | chr2    | 100605021 | 100605421 | Promoter (1-2kb)  | 2       | 100603768 | 100609358 | 1253          | ENSG00000234988 | LINC01849   |
| NR4A2_Medium | chr2    | 100919228 | 100919628 | Promoter (5-6kb)  | 2       | 100925146 | 100964176 | -5518         | ENSG00000170485 | NPAS2       |
| NR4A2_Medium | chr2    | 101111529 | 101111929 | Promoter (1-2kb)  | 2       | 101059452 | 101109963 | -1566         | ENSG00000204634 | TBC1D8      |
| NR4A2_Medium | chr2    | 102438269 | 102438669 | Promoter (5-6kb)  | 2       | 102432289 | 102432366 | 5980          | ENSG00000264764 | MIR4772     |
| NR4A2_Medium | chr2    | 105106379 | 105106779 | Promoter (3-4kb)  | 2       | 105097052 | 105103036 | -3343         | ENSG00000231851 | MRPS9-AS1   |
| NR4A2_Medium | chr2    | 106067611 | 106068011 | Promoter (1-2kb)  | 2       | 106065800 | 106077900 | 1811          | ENSG00000119147 | ECRG4       |
| NR4A2_Medium | chr2    | 106483959 | 106484359 | Promoter (3-4kb)  | 2       | 106487364 | 106511095 | -3005         | ENSG00000254126 | CD8B2       |
| NR4A2_Medium | chr2    | 108255107 | 108255507 | Promoter (7-8kb)  | 2       | 108247195 | 108265351 | 7912          | ENSG00000196228 | SULT1C3     |
| NR4A2_Medium | chr2    | 108715671 | 108716071 | Promoter (3-4kb)  | 2       | 108719482 | 108785809 | -3411         | ENSG00000153201 | RANBP2      |
| NR4A2_Medium | chr2    | 110214980 | 110215380 | Promoter (2-3kb)  | 2       | 110211530 | 110212823 | -2157         | ENSG00000175701 | MTLN        |
| NR4A2_Medium | chr2    | 110724628 | 110725028 | Promoter (7-8kb)  | 2       | 110732573 | 111094344 | -7545         | ENSG00000153093 | ACOXL       |
| NR4A2_Medium | chr2    | 110956467 | 110956867 | Promoter (6-7kb)  | 2       | 110963624 | 111101251 | -6757         | ENSG00000153093 | ACOXL       |
| NR4A2_Medium | chr2    | 111119815 | 111120215 | Promoter (<=1kb)  | 2       | 111119378 | 111124112 | 437           | ENSG00000153094 | BCL2L11     |
| NR4A2_Medium | chr2    | 111124412 | 111124812 | Promoter (<=1kb)  | 2       | 111123752 | 111146284 | 660           | ENSG00000153094 | BCL2L11     |
| NR4A2_Medium | chr2    | 111359545 | 111359945 | Promoter (5-6kb)  | 2       | 111196368 | 111365563 | 5618          | ENSG00000172965 | MIR4435-2HG |
| NR4A2_Medium | chr2    | 112431117 | 112431517 | Promoter (2-3kb)  | 2       | 112417777 | 112433519 | 2002          | ENSG00000015568 | RGPD5       |
| NR4A2_Medium | chr2    | 112792083 | 112792483 | Promoter (7-8kb)  | 2       | 112773915 | 112784590 | -7493         | ENSG00000115008 | IL1A        |
| NR4A2_Medium | chr2    | 113275021 | 113275421 | Promoter (3-4kb)  | 2       | 113241551 | 113278898 | 3477          | ENSG00000125618 | PAX8        |
| NR4A2_Medium | chr2    | 113763381 | 113763781 | Promoter (6-7kb)  | 2       | 113714353 | 113756693 | -6688         | ENSG00000115084 | SLC35F5     |
| NR4A2_Medium | chr2    | 113844883 | 113845283 | Promoter (1-2kb)  | 2       | 113831188 | 113843356 | -1527         | NA              | ACTR3-AS1   |
| NR4A2_Medium | chr2    | 113850837 | 113851237 | Promoter (7-8kb)  | 2       | 113831188 | 113843356 | -7481         | NA              | ACTR3-AS1   |
| NR4A2_Medium | chr2    | 115229419 | 115229819 | Promoter (4-5kb)  | 2       | 115234456 | 115525972 | -4637         | ENSG00000175497 | DPP10       |
| NR4A2_Medium | chr2    | 117938109 | 117938509 | Promoter (1-2kb)  | 2       | 117935498 | 117936901 | -1208         | ENSG00000125633 | CCDC93      |
| NR4A2_Medium | chr2    | 118221181 | 118221581 | Promoter (<=1kb)  | 2       | 118182939 | 118222250 | 669           | ENSG00000226856 | THORLNC     |
| NR4A2_Medium | chr2    | 121294248 | 121294648 | Promoter (9-10kb) | 2       | 121216587 | 121285202 | -9046         | ENSG00000115112 | TFCP2L1     |
| NR4A2_Medium | chr2    | 127211942 | 127212342 | Promoter (6-7kb)  | 2       | 127184120 | 127205767 | -6175         | ENSG00000186684 | CYP27C1     |
| NR4A2_Medium | chr2    | 127510109 | 127510509 | Promoter (4-5kb)  | 2       | 127505307 | 127514937 | 4428          | ENSG00000163166 | IWS1        |
| NR4A2_Medium | chr2    | 128094398 | 128094798 | Promoter (3-4kb)  | 2       | 128091211 | 128191428 | 3187          | ENSG00000136731 | UGGT1       |
| NR4A2_Medium | chr2    | 128284331 | 128284731 | Promoter (5-6kb)  | 2       | 128268690 | 128290196 | 5465          | ENSG00000136720 | HS6ST1      |
| NR4A2_Medium | chr2    | 128298025 | 128298425 | Promoter (7-8kb)  | 2       | 128268690 | 128290196 | -7829         | ENSG00000136720 | HS6ST1      |
| NR4A2_Medium | chr2    | 129281050 | 129281450 | Promoter (7-8kb)  | 2       | 129242173 | 129273848 | -7202         | ENSG00000204460 | LINC01854   |
| NR4A2_Medium | chr2    | 129914296 | 129914696 | Promoter (8-9kb)  | 2       | 129923177 | 129946703 | -8481         | ENSG00000237574 | LINC01856   |
| NR4A2_Medium | chr2    | 129916918 | 129917318 | Promoter (5-6kb)  | 2       | 129923177 | 129946703 | -5859         | ENSG00000237574 | LINC01856   |
| NR4A2_Medium | chr2    | 129940167 | 129940567 | Promoter (5-6kb)  | 2       | 129922863 | 129934317 | -5850         | ENSG00000214100 | PLAC9P1     |
| NR4A2_Medium | chr2    | 130127751 | 130128151 | Promoter (1-2kb)  | 2       | 130073535 | 130129222 | 1071          | ENSG00000196604 | POTEF       |
| NR4A2_Medium | chr2    | 130758241 | 130758641 | Promoter (1-2kb)  | 2       | 130756291 | 130768134 | 1950          | ENSG00000178171 | AMER3       |
| NR4A2_Medium | chr2    | 131099340 | 131099740 | Promoter (5-6kb)  | 2       | 131104847 | 131147797 | -5107         | ENSG00000115762 | PLEKHB2     |
| NR4A2_Medium | chr2    | 132266283 | 132266683 | Promoter (8-9kb)  | 2       | 132147591 | 132257969 | -8314         | ENSG00000163046 | ANKRD30BL   |
| NR4A2_Medium | chr2    | 132267244 | 132267644 | Promoter (9-10kb) | 2       | 132147591 | 132257969 | -9275         | ENSG00000163046 | ANKRD30BL   |
| NR4A2_Medium | chr2    | 135609771 | 135610171 | Promoter (4-5kb)  | 2       | 135604856 | 135636183 | 4915          | ENSG00000048991 | R3HDM1      |
| NR4A2_Medium | chr2    | 135768365 | 135768765 | Promoter (3-4kb)  | 2       | 135772447 | 135780221 | -3682         | ENSG00000144224 | UBXN4       |
| NR4A2_Medium | chr2    | 136007058 | 136007458 | Promoter (6-7kb)  | 2       | 136000429 | 136007748 | 6629          | ENSG00000231890 | DARS1-AS1   |
| NR4A2_Medium | chr2    | 136757458 | 136757858 | Promoter (7-8kb)  | 2       | 136765545 | 137056515 | -7687         | ENSG00000144229 | THSD7B      |
| NR4A2_Medium | chr2    | 136892154 | 136892554 | Promoter (9-10kb) | 2       | 136882179 | 137677717 | 9975          | ENSG00000144229 | THSD7B      |
| NR4A2_Medium | chr2    | 138093713 | 138094113 | Promoter (7-8kb)  | 2       | 138101878 | 138107178 | -7765         | NA              | LINC01832   |
| NR4A2_Medium | chr2    | 138895664 | 138896064 | Promoter (1-2kb)  | 2       | 138897151 | 138898098 | -1087         | NA              | YY1P2       |
| NR4A2_Medium | chr2    | 142920040 | 142920440 | Promoter (1-2kb)  | 2       | 142918679 | 142967494 | 1361          | ENSG00000115919 | KYNU        |
| NR4A2_Medium | chr2    | 144146932 | 144147332 | Promoter (1-2kb)  | 2       | 144007334 | 144145905 | -1027         | ENSG00000121964 | GTDC1       |
| NR4A2_Medium | chr2    | 144169231 | 144169631 | Promoter (7-8kb)  | 2       | 143946016 | 144177217 | 7586          | ENSG00000121964 | GTDC1       |
| NR4A2_Medium | chr2    | 144202775 | 144203175 | Promoter (8-9kb)  | 2       | 143946016 | 144211579 | 8404          | ENSG00000121964 | GTDC1       |
| NR4A2_Medium | chr2    | 144399877 | 144400277 | Promoter (1-2kb)  | 2       | 144388662 | 144398318 | -1559         | ENSG00000169554 | ZEB2        |
| NR4A2_Medium | chr2    | 146578224 | 146578624 | Promoter (8-9kb)  | 2       | 146587506 | 146589310 | -8882         | NA              | PABPC1P2    |
| NR4A2_Medium | chr2    | 150484448 | 150484848 | Promoter (<=1kb)  | 2       | 150468209 | 150485382 | 534           | ENSG00000115963 | RND3        |
| NR4A2_Medium | chr2    | 151513510 | 151513910 | Promoter (<=1kb)  | 2       | 151496305 | 151513606 | 0             | ENSG00000183091 | NEB         |
| NR4A2_Medium | chr2    | 151578565 | 151578965 | Promoter (4-5kb)  | 2       | 151485341 | 151583619 | 4654          | ENSG000001830   |             |

| Condition    | peakChr | peakStart | peakEnd   | annotation        | geneChr | geneStart | geneEnd   | distanceToTSS | geneID          | geneSymbol   |
|--------------|---------|-----------|-----------|-------------------|---------|-----------|-----------|---------------|-----------------|--------------|
| NR4A2_Medium | chr2    | 165778005 | 165778405 | Promoter (6-7kb)  | 2       | 165770666 | 165771691 | -6314         | ENSG00000115339 | GALNT3       |
| NR4A2_Medium | chr2    | 166143186 | 166143586 | Promoter (5-6kb)  | 2       | 165984641 | 166149135 | 5549          | ENSG00000144285 | SCN1A        |
| NR4A2_Medium | chr2    | 166211365 | 166211765 | Promoter (6-7kb)  | 2       | 166198299 | 166205239 | -6126         | ENSG00000169432 | SCN9A        |
| NR4A2_Medium | chr2    | 166476697 | 166477097 | Promoter (9-10kb) | 2       | 166405513 | 166486968 | 9871          | ENSG00000136546 | SCN7A        |
| NR4A2_Medium | chr2    | 166883579 | 166883979 | Promoter (4-5kb)  | 2       | 166888487 | 167259749 | -4508         | ENSG00000163092 | XIRP2        |
| NR4A2_Medium | chr2    | 169077870 | 169078270 | Promoter (2-3kb)  | 2       | 169081107 | 169096167 | -2837         | ENSG00000073737 | DHRS9        |
| NR4A2_Medium | chr2    | 169542833 | 169543233 | Promoter (2-3kb)  | 2       | 169529793 | 169540124 | -2709         | ENSG00000138399 | FASTKD1      |
| NR4A2_Medium | chr2    | 169560221 | 169560621 | Promoter (2-3kb)  | 2       | 169560271 | 169563390 | 2769          | ENSG00000138399 | FASTKD1      |
| NR4A2_Medium | chr2    | 169595684 | 169596084 | Promoter (7-8kb)  | 2       | 169604040 | 169630815 | -7956         | ENSG00000138398 | PPIG         |
| NR4A2_Medium | chr2    | 169941120 | 169941520 | Promoter (4-5kb)  | 2       | 169946310 | 170084120 | -4790         | ENSG00000144357 | UBR3         |
| NR4A2_Medium | chr2    | 170349535 | 170349935 | Promoter (<=1kb)  | 2       | 170341154 | 170350343 | 408           | ENSG00000231898 | MYO3B-AS1    |
| NR4A2_Medium | chr2    | 171337576 | 171337976 | Promoter (1-2kb)  | 2       | 171323998 | 171339213 | 1237          | ENSG00000123600 | METTL8       |
| NR4A2_Medium | chr2    | 171733086 | 171733486 | Promoter (6-7kb)  | 2       | 171726558 | 171748407 | 6528          | ENSG00000077380 | DYNC112      |
| NR4A2_Medium | chr2    | 172015976 | 172016376 | Promoter (5-6kb)  | 2       | 172021799 | 172063750 | -5423         | ENSG00000172878 | METAP1D      |
| NR4A2_Medium | chr2    | 172821535 | 172821935 | Promoter (<=1kb)  | 2       | 172821575 | 173052893 | 0             | ENSG00000091428 | RAPGEF4      |
| NR4A2_Medium | chr2    | 173349873 | 173350273 | Promoter (4-5kb)  | 2       | 173354820 | 173368904 | -4547         | ENSG00000144354 | CDCA7        |
| NR4A2_Medium | chr2    | 174319647 | 174320047 | Promoter (5-6kb)  | 2       | 174326027 | 174330643 | -5980         | ENSG00000231453 | LINC01305    |
| NR4A2_Medium | chr2    | 174767119 | 174767519 | Promoter (2-3kb)  | 2       | 174747592 | 174764472 | -2647         | ENSG00000138435 | CHRNA1       |
| NR4A2_Medium | chr2    | 174976746 | 174977146 | Promoter (<=1kb)  | 2       | 174824516 | 174975931 | -815          | ENSG00000128656 | CHN1         |
| NR4A2_Medium | chr2    | 175106810 | 175107210 | Promoter (7-8kb)  | 2       | 175074288 | 175114812 | 7602          | ENSG00000115966 | ATF2         |
| NR4A2_Medium | chr2    | 176167381 | 176167781 | Promoter (3-4kb)  | 2       | 176164077 | 176173102 | 3304          | ENSG00000128652 | HOXD3        |
| NR4A2_Medium | chr2    | 176592618 | 176593018 | Promoter (8-9kb)  | 2       | 176600980 | 176601052 | 8034          | ENSG00000283203 | MIR1246      |
| NR4A2_Medium | chr2    | 177210159 | 177210559 | Promoter (2-3kb)  | 2       | 177212563 | 177220085 | -2004         | ENSG00000170144 | HNRNPA3      |
| NR4A2_Medium | chr2    | 177306709 | 177307109 | Promoter (6-7kb)  | 2       | 177313806 | 177313882 | 6773          | ENSG00000278418 | MIR6512      |
| NR4A2_Medium | chr2    | 177331962 | 177332362 | Promoter (8-9kb)  | 2       | 177283514 | 177323164 | -8798         | ENSG00000213963 | LOC100130691 |
| NR4A2_Medium | chr2    | 178772593 | 178772993 | Promoter (<=1kb)  | 2       | 178772771 | 178779905 | 0             | ENSG00000237298 | LOC101927055 |
| NR4A2_Medium | chr2    | 181994766 | 181995166 | Promoter (8-9kb)  | 2       | 181986022 | 182129538 | 8744          | ENSG00000150722 | PPP1R1C      |
| NR4A2_Medium | chr2    | 186421599 | 186421999 | Promoter (<=1kb)  | 2       | 186033617 | 186422432 | 433           | NA              | LINC01473    |
| NR4A2_Medium | chr2    | 186581417 | 186581817 | Promoter (8-9kb)  | 2       | 186590056 | 186680901 | -8239         | ENSG00000138448 | ITGAV        |
| NR4A2_Medium | chr2    | 186675525 | 186675925 | Promoter (6-7kb)  | 2       | 186668877 | 186676283 | 6648          | ENSG00000138448 | ITGAV        |
| NR4A2_Medium | chr2    | 187496139 | 187496539 | Promoter (<=1kb)  | 2       | 187483930 | 187496976 | 437           | ENSG00000003436 | TFPI         |
| NR4A2_Medium | chr2    | 187544082 | 187544482 | Promoter (9-10kb) | 2       | 187496881 | 187554351 | 9869          | ENSG00000003436 | TFPI         |
| NR4A2_Medium | chr2    | 189653675 | 189654075 | Promoter (7-8kb)  | 2       | 189661385 | 189670757 | -7310         | ENSG00000138381 | ASNSD1       |
| NR4A2_Medium | chr2    | 189673675 | 189674075 | Promoter (<=1kb)  | 2       | 189674290 | 189761193 | -215          | ENSG00000151687 | ANKAR        |
| NR4A2_Medium | chr2    | 189758690 | 189759090 | Promoter (2-3kb)  | 2       | 189750534 | 189761663 | 2573          | ENSG00000128694 | OSGEPL1      |
| NR4A2_Medium | chr2    | 189874613 | 189875013 | Promoter (4-5kb)  | 2       | 189879627 | 190164051 | -4614         | ENSG00000187699 | C2orf88      |
| NR4A2_Medium | chr2    | 190334653 | 190335053 | Promoter (8-9kb)  | 2       | 190343570 | 190371665 | -8517         | ENSG00000151689 | INPP1        |
| NR4A2_Medium | chr2    | 190359299 | 190359699 | Promoter (<=1kb)  | 2       | 190360018 | 190363007 | -319          | ENSG00000151689 | INPP1        |
| NR4A2_Medium | chr2    | 190400135 | 190400535 | Promoter (7-8kb)  | 2       | 190408355 | 190436156 | -7820         | ENSG00000151690 | MFSD6        |
| NR4A2_Medium | chr2    | 190652070 | 190652470 | Promoter (1-2kb)  | 2       | 190653725 | 190659362 | -1255         | ENSG00000138386 | NAB1         |
| NR4A2_Medium | chr2    | 190975763 | 190976163 | Promoter (<=1kb)  | 2       | 190970582 | 190976922 | 759           | ENSG00000115415 | STAT1        |
| NR4A2_Medium | chr2    | 194726200 | 194726600 | Promoter (3-4kb)  | 2       | 194730595 | 194761435 | -3995         | ENSG00000230173 | LINC01790    |
| NR4A2_Medium | chr2    | 196766840 | 196767240 | Promoter (<=1kb)  | 2       | 196764579 | 196767004 | 0             | ENSG00000119041 | GTF3C3       |
| NR4A2_Medium | chr2    | 196818943 | 196819343 | Promoter (8-9kb)  | 2       | 196805002 | 196810276 | -8667         | ENSG00000187944 | C2orf66      |
| NR4A2_Medium | chr2    | 197509314 | 197509714 | Promoter (5-6kb)  | 2       | 197515571 | 197553699 | -5857         | ENSG00000115540 | MOB4         |
| NR4A2_Medium | chr2    | 198089377 | 198089777 | Promoter (5-6kb)  | 2       | 198083749 | 198149884 | 5628          | ENSG00000115896 | PLCL1        |
| NR4A2_Medium | chr2    | 198092343 | 198092743 | Promoter (8-9kb)  | 2       | 198083749 | 198149884 | 8594          | ENSG00000115896 | PLCL1        |
| NR4A2_Medium | chr2    | 200315123 | 200315523 | Promoter (6-7kb)  | 2       | 200308950 | 200482256 | 6173          | ENSG00000196141 | SPATS2L      |
| NR4A2_Medium | chr2    | 200392003 | 200392403 | Promoter (<=1kb)  | 2       | 200393077 | 200467378 | -674          | ENSG00000196141 | SPATS2L      |
| NR4A2_Medium | chr2    | 200504814 | 200505214 | Promoter (4-5kb)  | 2       | 200510008 | 200535124 | -4794         | ENSG00000163535 | SGO2         |
| NR4A2_Medium | chr2    | 200767197 | 200767597 | Promoter (4-5kb)  | 2       | 200762308 | 200794239 | 4889          | NA              | AOX3P-AOX2P  |
| NR4A2_Medium | chr2    | 201791000 | 201791400 | Promoter (<=1kb)  | 2       | 201790472 | 201807938 | 528           | ENSG00000138395 | CDK15        |
| NR4A2_Medium | chr2    | 201846450 | 201846850 | Promoter (7-8kb)  | 2       | 201854760 | 201893360 | -7910         | ENSG00000138395 | CDK15        |
| NR4A2_Medium | chr2    | 202129209 | 202129609 | Promoter (6-7kb)  | 2       | 202135716 | 202197862 | -6107         | ENSG00000182329 | KIAA2012     |
| NR4A2_Medium | chr2    | 202455425 | 202455825 | Promoter (8-9kb)  | 2       | 202464808 | 202560341 | -8983         | ENSG00000204217 | BMPR2        |
| NR4A2_Medium | chr2    | 202829974 | 202830374 | Promoter (<=1kb)  | 2       | 202819605 | 202829234 | -740          | ENSG00000163596 | ICA1L        |
| NR4A2_Medium | chr2    | 202839117 | 202839517 | Promoter (9-10kb) | 2       | 202819605 | 202829234 | -9883         | ENSG00000163596 | ICA1L        |
| NR4A2_Medium | chr2    | 203488228 | 203488628 | Promoter (6-7kb)  | 2       | 203439437 | 203495353 | 6725          | ENSG00000173166 | RAPH1        |
| NR4A2_Medium | chr2    | 204974749 | 204975149 | Promoter (9-10kb) | 2       | 204965152 | 205620162 | 9597          | ENSG00000116117 | PARD3B       |
| NR4A2_Medium | chr2    | 205690440 | 205690840 | Promoter (4-5kb)  | 2       | 205685793 | 205697734 | 4647          | ENSG00000118257 | NRP2         |
| NR4A2_Medium | chr2    | 206768456 | 206768856 | Promoter (2-3kb)  | 2       | 206765647 | 206791946 | 2809          | ENSG00000118246 | FASTKD2      |
| NR4A2_Medium | chr2    | 207585482 | 207585882 | Promoter (8-9kb)  | 2       | 207576636 | 207597458 | 8846          | ENSG00000118260 | CREB1        |
| NR4A2_Medium | chr2    | 208260757 | 208261157 | Promoter (4-5kb)  | 2       | 208248597 | 208266074 | 4917          | ENSG00000138413 | IDH1         |
| NR4A2_Medium | chr2    | 208296520 | 208296920 | Promoter (1-2kb)  | 2       | 208298641 | 208302580 | -1721         | ENSG00000115020 | PIKFYVE      |
| NR4A2_Medium | chr2    | 208334745 | 208335145 | Promoter (<=1kb)  | 2       | 208334372 | 208336865 | 373           | ENSG00000115020 | PIKFYVE      |
| NR4A2_Medium | chr2    | 209420105 | 209420505 | Promoter (3-4kb)  | 2       | 209424058 | 209730518 | -3553         | ENSG00000078018 | MAP2         |
| NR4A2_Medium | chr2    | 212530845 | 212531245 | Promoter (7-8kb)  | 2       | 211619253 | 212538529 | 7284          | ENSG00000178568 | ERBB4        |
| NR4A2_Medium | chr2    | 215314502 | 215314902 | Promoter (2-3kb)  | 2       | 215312498 | 215326978 | 2004          | ENSG00000138363 | ATIC         |
| NR4A2_Medium | chr2    | 215365291 | 215365691 | Promoter (<=1kb)  | 2       | 215361341 | 215365676 | 0             | ENSG00000115414 | FN1          |
| NR4A2_Medium | chr2    | 215368292 | 215368692 | Promoter (1-2kb)  | 2       | 215367679 | 215370520 | 1828          | ENSG00000115414 | FN1          |
| NR4A2_Medium | chr2    | 216364793 | 216365193 | Promoter (7-8kb)  | 2       | 216257865 | 216372483 | 7290          | ENSG00000144583 | MARCHF4      |
| NR4A2_Medium | chr2    | 216375029 | 216375429 | Promoter (2-3kb)  | 2       | 216257865 | 216372483 | -2546         | ENSG00000144583 | MARCHF4      |
| NR4A2_Medium | chr2    | 216424926 | 216425326 | Promoter (1-2kb)  | 2       | 216427055 | 216432772 | -1729         | ENSG00000138375 | SMARCAL1     |
| NR4A2_Medium | chr2    | 217266355 | 217266755 | Promoter (4-5kb)  | 2       | 217261699 | 217319531 | 4656          | NA              | DIRC3-AS1    |
| NR4A2_Medium | chr2    | 217840199 | 217840599 | Promoter (1-2kb)  | 2       | 217802789 | 217842160 | 1561          | ENSG00000079308 | TNS1         |
| NR4A2_Medium | chr2    | 217898533 | 217898933 | Promoter (1-2kb)  | 2       | 217900513 | 217900628 | 1695          | ENSG00000275458 | MIR6809      |
| NR4A2_Medium | chr2    | 218169127 | 218169527 | Promoter (2-3kb)  | 2       | 218162841 | 218166962 | -2165         | ENSG00000163464 | CXCR1        |
| NR4A2_Medium | chr2    | 218804424 | 218804824 | Promoter (1-2kb)  | 2       | 218805914 | 218813025 | -1090         | ENSG00000135929 | CYP27A1      |
| NR4A2_Medium | chr2    | 218974034 | 218974434 | Promoter (<=1kb)  | 2       | 218975393 | 218977966 | -959          | NA              | LINC00608    |
| NR4A2_Medium | chr2    | 219337698 | 219338098 | Promoter (4-5kb)  | 2       | 219327407 | 219333177 | -4521         | ENSG00000182698 | RESP18       |
| NR4A2_Medium | chr2    | 219432603 | 219433003 | Promoter (1-2kb)  | 2       | 219434843 | 219493629 | -1840         | ENSG00000072195 | SPEG         |
| NR4A2_Medium | chr2    | 219449087 | 219449487 | Promoter (1-2kb)  | 2       | 219450670 | 219466861 | -1183         | ENSG00000072195 | SPEG         |
| NR4A2_Medium | chr2    | 219618969 | 219619369 | Promoter (4-5kb)  | 2       | 219614806 | 219616212 | 4163          | ENSG00000144589 | STK11IP      |
| NR4A2_Medium | chr2    | 219630973 | 219631373 | Promoter (<=1kb)  | 2       | 219631130 | 219633009 | 0             | ENSG00000114923 | SLC4A3       |
| NR4A2_Medium | chr2    | 221581341 | 221581741 | Promoter (7-8kb)  | 2       | 221425901 | 221574202 | -7139         | ENSG00000116106 | EPHA4        |
| NR4A2_Medium | chr2    | 224476448 | 224476848 | Promoter (3-4kb)  | 2       | 224473902 | 224480124 | 3276          | ENSG00000036257 | CUL3         |
| NR4A2_Medium | chr2    | 225390984 | 225391384 | Promoter (8-9kb)  | 2       | 225399710 | 225654018 | -8326         | ENSG00000144460 | NYAP2        |
| NR4A2_Medium | chr2    | 226845947 | 226846347 | Promoter (8-9kb)  | 2       | 226837548 | 226864856 | 8399          | ENSG00000144468 | RHBDD1       |
| NR4A2_Medium | chr2    | 227539437 | 227539837 | Promoter (2-3kb)  | 2       | 227536955 | 227554912 | 2482          | ENSG00000173744 | AGFG1        |
| NR4A2_Medium | chr2    | 227822490 | 227822890 | Promoter (7-8kb)  | 2       | 227815369 | 227817463 | 7121          | ENSG00000115009 | CCL20        |
| NR4A2_Medium | chr2    | 229800119 | 229800519 | Promoter (3-4kb)  | 2       | 229794861 | 229796732 | -3387         | ENSG00000153827 | TRIP12       |
| NR4A2_Medium | chr2    | 229921289 | 229921689 | Promoter (<=1kb)  | 2       | 229859226 | 229921358 | 0             | ENSG00000153827 | TRIP12       |
| NR4A2_Medium | chr2    | 230166936 | 230167336 | Promoter (3-4kb)  | 2       | 230169128 | 230170915 | 3579</        |                 |              |



| Condition    | peakChr | peakStart | peakEnd   | annotation         | geneChr | geneStart | geneEnd   | distanceToTSS | geneID          | geneSymbol   |
|--------------|---------|-----------|-----------|--------------------|---------|-----------|-----------|---------------|-----------------|--------------|
| NR4A2_Medium | chr2    | 233788732 | 233789132 | Promoter (7-8kb)   | 2       | 233796288 | 233802468 | -7156         | ENSG00000185038 | MROH2A       |
| NR4A2_Medium | chr2    | 233795442 | 233795842 | Promoter (<=1kb)   | 2       | 233796288 | 233802468 | -446          | ENSG00000185038 | MROH2A       |
| NR4A2_Medium | chr2    | 233959613 | 233960013 | Promoter (5-6kb)   | 2       | 233953709 | 233960924 | 5904          | ENSG00000144481 | TRPM8        |
| NR4A2_Medium | chr2    | 234681399 | 234681799 | Promoter (<=1kb)   | 2       | 234682668 | 234717764 | -869          | ENSG00000280744 | LINC01173    |
| NR4A2_Medium | chr2    | 236160042 | 236160442 | Promoter (6-7kb)   | 2       | 236165734 | 236167329 | 6887          | ENSG00000168505 | GBX2         |
| NR4A2_Medium | chr2    | 236334256 | 236334656 | Promoter (<=1kb)   | 2       | 236324671 | 236333363 | -893          | ENSG00000132321 | IQCA1        |
| NR4A2_Medium | chr2    | 237545157 | 237545557 | Promoter (<=1kb)   | 2       | 237546405 | 237553843 | -848          | ENSG00000115648 | MLPH         |
| NR4A2_Medium | chr2    | 237566036 | 237566436 | Promoter (<=1kb)   | 2       | 237566574 | 237567175 | -138          | ENSG00000071677 | PRLH         |
| NR4A2_Medium | chr2    | 237597679 | 237598079 | Promoter (6-7kb)   | 2       | 237574322 | 237591071 | -6608         | ENSG00000124839 | RAB17        |
| NR4A2_Medium | chr2    | 237757349 | 237757749 | Promoter (1-2kb)   | 2       | 237756095 | 237770776 | 1254          | ENSG00000124831 | LRRFIP1      |
| NR4A2_Medium | chr2    | 237759274 | 237759674 | Promoter (3-4kb)   | 2       | 237756095 | 237770776 | 3179          | ENSG00000124831 | LRRFIP1      |
| NR4A2_Medium | chr2    | 238118439 | 238118851 | Promoter (8-9kb)   | 2       | 238127390 | 238133287 | -8539         | ENSG00000144488 | ESPNL        |
| NR4A2_Medium | chr2    | 238148246 | 238148646 | Promoter (9-10kb)  | 2       | 238138668 | 238152947 | 9578          | ENSG00000168427 | KLHL30       |
| NR4A2_Medium | chr2    | 239163635 | 239164035 | Promoter (8-9kb)   | 2       | 239134349 | 239155575 | -8060         | ENSG00000068024 | HDAC4        |
| NR4A2_Medium | chr2    | 240023358 | 240023758 | Promoter (1-2kb)   | 2       | 239960739 | 240025306 | 1548          | ENSG00000130414 | NDUFA10      |
| NR4A2_Medium | chr2    | 240147499 | 240147899 | Promoter (2-3kb)   | 2       | 240139026 | 240144562 | -2937         | ENSG00000178602 | OTOS         |
| NR4A2_Medium | chr2    | 240510350 | 240510750 | Promoter (2-3kb)   | 2       | 240500524 | 240507809 | -2541         | ENSG00000144504 | ANKMY1       |
| NR4A2_Medium | chr2    | 240732009 | 240732409 | Promoter (5-6kb)   | 2       | 240726838 | 240737542 | 5133          | ENSG00000130294 | KIF1A        |
| NR4A2_Medium | chr2    | 240817061 | 240817461 | Promoter (1-2kb)   | 2       | 240788117 | 240818966 | 1505          | ENSG00000130294 | KIF1A        |
| NR4A2_Medium | chr2    | 240885068 | 240885468 | Promoter (6-7kb)   | 2       | 240886048 | 240892035 | 6567          | ENSG00000172478 | MAB21L4      |
| NR4A2_Medium | chr2    | 240898297 | 240898697 | Promoter (2-3kb)   | 2       | 240886048 | 240896156 | -2141         | ENSG00000172478 | MAB21L4      |
| NR4A2_Medium | chr2    | 240950750 | 240951245 | Promoter (1-2kb)   | 2       | 240949655 | 240950929 | 1095          | ENSG00000226321 | CROCC2       |
| NR4A2_Medium | chr2    | 240961379 | 240961779 | Promoter (1-2kb)   | 2       | 240959096 | 240959800 | -1579         | ENSG00000233392 | UICLM        |
| NR4A2_Medium | chr2    | 241038602 | 241039002 | Promoter (1-2kb)   | 2       | 241040116 | 241041362 | -1114         | ENSG00000162804 | SNED1        |
| NR4A2_Medium | chr2    | 241052595 | 241052995 | Promoter (1-2kb)   | 2       | 241051277 | 241052394 | 1318          | ENSG00000162804 | SNED1        |
| NR4A2_Medium | chr2    | 241062411 | 241062811 | Promoter (<=1kb)   | 2       | 241063378 | 241087461 | -567          | ENSG00000162804 | SNED1        |
| NR4A2_Medium | chr2    | 241097321 | 241097721 | Promoter (1-2kb)   | 2       | 241087204 | 241096070 | -1251         | ENSG00000122085 | MTERF4       |
| NR4A2_Medium | chr2    | 241485359 | 241485780 | Promoter (1-2kb)   | 2       | 241484090 | 241491649 | 1269          | ENSG00000006607 | FARP2        |
| NR4A2_Medium | chr2    | 241488987 | 241489387 | Promoter (<=1kb)   | 2       | 241489961 | 241494119 | -574          | ENSG00000006607 | FARP2        |
| NR4A2_Medium | chr2    | 241516701 | 241517101 | Promoter (6-7kb)   | 2       | 241500143 | 241509730 | -6971         | ENSG00000115694 | STK25        |
| NR4A2_Medium | chr2    | 241655941 | 241656341 | Promoter (2-3kb)   | 2       | 241653467 | 241666769 | 2474          | ENSG00000168397 | ATG4B        |
| NR4A2_Medium | chr2    | 241657114 | 241657514 | Promoter (3-4kb)   | 2       | 241653467 | 241666769 | 3647          | ENSG00000168397 | ATG4B        |
| NR4A2_Medium | chr2    | 241671594 | 241671994 | Promoter (1-2kb)   | 2       | 241670561 | 241671917 | 1033          | ENSG00000168397 | ATG4B        |
| NR4A2_Medium | chr2    | 241679645 | 241680045 | Promoter (5-6kb)   | 2       | 241676178 | 241685877 | 5832          | ENSG00000168393 | DTYMK        |
| NR4A2_Medium | chr3    | 2736641   | 2737041   | Promoter (<=1kb)   | 3       | 2735873   | 2745627   | 768           | ENSG00000144619 | CNTN4        |
| NR4A2_Medium | chr3    | 3032882   | 3033282   | Promoter (6-7kb)   | 3       | 3039624   | 3057953   | -6342         | ENSG00000144619 | CNTN4        |
| NR4A2_Medium | chr3    | 5182342   | 5182742   | Promoter (4-5kb)   | 3       | 5187646   | 5208172   | -4904         | ENSG00000134109 | EDEM1        |
| NR4A2_Medium | chr3    | 6863104   | 6863504   | Promoter (<=1kb)   | 3       | 6862743   | 7306652   | 361           | ENSG00000196277 | GRM7         |
| NR4A2_Medium | chr3    | 7289546   | 7289946   | Promoter (8-9kb)   | 3       | 7298577   | 7415164   | -8631         | ENSG00000196277 | GRM7         |
| NR4A2_Medium | chr3    | 8013638   | 8014038   | Promoter (2-3kb)   | 3       | 7952805   | 8016307   | 2269          | ENSG00000227110 | LOC101927394 |
| NR4A2_Medium | chr3    | 8915948   | 8916348   | Promoter (3-4kb)   | 3       | 8881420   | 8912469   | -3479         | ENSG00000070950 | RAD18        |
| NR4A2_Medium | chr3    | 9801971   | 9802371   | Promoter (4-5kb)   | 3       | 9797658   | 9813038   | 4313          | ENSG00000241553 | ARPC4        |
| NR4A2_Medium | chr3    | 10496708  | 10497108  | Promoter (8-9kb)   | 3       | 10326275  | 10505531  | 8423          | ENSG00000157087 | ATP2B2       |
| NR4A2_Medium | chr3    | 10709011  | 10709411  | Promoter (1-2kb)   | 3       | 10328008  | 10708007  | -1004         | ENSG00000157087 | ATP2B2       |
| NR4A2_Medium | chr3    | 10992098  | 10992498  | Promoter (<=1kb)   | 3       | 10992186  | 11039174  | 0             | ENSG00000157103 | SLC6A1       |
| NR4A2_Medium | chr3    | 11284983  | 11285383  | Promoter (7-8kb)   | 3       | 11277219  | 11309028  | 7764          | ENSG00000197548 | ATG7         |
| NR4A2_Medium | chr3    | 11800732  | 11801132  | Promoter (8-9kb)   | 3       | 11790442  | 11810059  | 8927          | ENSG00000144559 | TAMM41       |
| NR4A2_Medium | chr3    | 12291385  | 12291785  | Promoter (2-3kb)   | 3       | 12289111  | 12406846  | 2274          | ENSG00000132170 | PPARG        |
| NR4A2_Medium | chr3    | 12850254  | 12850654  | Promoter (8-9kb)   | 3       | 12834946  | 12841582  | -8672         | ENSG00000144713 | RPL32        |
| NR4A2_Medium | chr3    | 13071546  | 13071946  | Promoter (1-2kb)   | 3       | 12897043  | 13073429  | 1483          | ENSG00000144711 | IQSEC1       |
| NR4A2_Medium | chr3    | 13354818  | 13355218  | Promoter (<=1kb)   | 3       | 13351661  | 13354694  | -124          | ENSG00000132182 | NUP210       |
| NR4A2_Medium | chr3    | 13410577  | 13410977  | Promoter (9-10kb)  | 3       | 13351663  | 13420309  | 9332          | ENSG00000132182 | NUP210       |
| NR4A2_Medium | chr3    | 13490515  | 13490915  | Promoter (5-6kb)   | 3       | 13496588  | 13504113  | -5673         | ENSG00000163517 | HDAC11       |
| NR4A2_Medium | chr3    | 13609493  | 13609893  | Promoter (4-5kb)   | 3       | 13613898  | 13618993  | -4005         | ENSG00000163520 | FBLN2        |
| NR4A2_Medium | chr3    | 13868571  | 13869190  | Promoter (5-6kb)   | 3       | 13863668  | 13875113  | 5923          | ENSG00000154764 | WNT7A        |
| NR4A2_Medium | chr3    | 14510536  | 14510936  | Promoter (2-3kb)   | 3       | 14491170  | 14513678  | 2742          | ENSG00000144596 | GRIP2        |
| NR4A2_Medium | chr3    | 15061275  | 15061675  | Promoter (3-4kb)   | 3       | 15049212  | 15065260  | 3585          | ENSG00000131368 | MRPS25       |
| NR4A2_Medium | chr3    | 15247909  | 15248309  | Promoter (<=1kb)   | 3       | 15247237  | 15251302  | 672           | ENSG00000131375 | CAPN7        |
| NR4A2_Medium | chr3    | 15260671  | 15261071  | Promoter (2-3kb)   | 3       | 15258228  | 15264496  | 2443          | ENSG00000224660 | SH3BP5-AS1   |
| NR4A2_Medium | chr3    | 15351147  | 15351547  | Promoter (9-10kb)  | 3       | 15255650  | 15341368  | -9779         | ENSG00000131370 | SH3BP5       |
| NR4A2_Medium | chr3    | 15682591  | 15682991  | Promoter (3-4kb)   | 3       | 15679301  | 15686453  | 3462          | ENSG00000206560 | ANKRD28      |
| NR4A2_Medium | chr3    | 16504921  | 16505321  | Promoter (7-8kb)   | 3       | 16378095  | 16512904  | 7583          | ENSG00000131378 | RFTN1        |
| NR4A2_Medium | chr3    | 17620262  | 17620662  | Promoter (3-4kb)   | 3       | 17508474  | 17623913  | 3251          | ENSG00000131374 | TBC1D5       |
| NR4A2_Medium | chr3    | 18344458  | 18344858  | Promoter (6-7kb)   | 3       | 18349541  | 18351531  | 6673          | ENSG00000182568 | SATB1        |
| NR4A2_Medium | chr3    | 19322468  | 19322868  | Promoter (7-8kb)   | 3       | 19314848  | 19314931  | -7537         | ENSG00000271898 | MIR4791      |
| NR4A2_Medium | chr3    | 20040789  | 20041189  | Promoter (<=1kb)   | 3       | 20040698  | 20101113  | 91            | ENSG00000114166 | KAT2B        |
| NR4A2_Medium | chr3    | 20043621  | 20044021  | Promoter (2-3kb)   | 3       | 20040698  | 20101113  | 2923          | ENSG00000114166 | KAT2B        |
| NR4A2_Medium | chr3    | 21425459  | 21425859  | Promoter (5-6kb)   | 3       | 21421379  | 21431124  | 5265          | ENSG00000151789 | ZNF385D      |
| NR4A2_Medium | chr3    | 21952302  | 21952702  | Promoter (4-5kb)   | 3       | 21957136  | 21979828  | -4434         | ENSG00000223351 | ZNF385D-AS2  |
| NR4A2_Medium | chr3    | 23921377  | 23921777  | Promoter (3-4kb)   | 3       | 23917705  | 23919551  | 3672          | ENSG00000174748 | RPL15        |
| NR4A2_Medium | chr3    | 30886105  | 30886505  | Promoter (8-9kb)   | 3       | 30797677  | 30894661  | 8156          | ENSG00000144644 | GADL1        |
| NR4A2_Medium | chr3    | 31523869  | 31524269  | Promoter (8-9kb)   | 3       | 31532638  | 31620274  | -8369         | ENSG00000163527 | STT3B        |
| NR4A2_Medium | chr3    | 31922554  | 31922954  | Promoter (3-4kb)   | 3       | 31748014  | 31919500  | -3054         | ENSG00000144645 | OSBPL10      |
| NR4A2_Medium | chr3    | 32497309  | 32497709  | Promoter (5-6kb)   | 3       | 32487733  | 32502796  | 5087          | ENSG00000091317 | CMTM6        |
| NR4A2_Medium | chr3    | 32504374  | 32504774  | Promoter (1-2kb)   | 3       | 32481312  | 32502852  | -1522         | ENSG00000091317 | CMTM6        |
| NR4A2_Medium | chr3    | 32720611  | 32721011  | Promoter (4-5kb)   | 3       | 32715996  | 32727808  | 4615          | ENSG00000182973 | CNOT10       |
| NR4A2_Medium | chr3    | 33052942  | 33053342  | Promoter (6-7kb)   | 3       | 33045606  | 33046192  | -6750         | ENSG00000170266 | GLB1         |
| NR4A2_Medium | chr3    | 33433039  | 33433439  | Promoter (6-7kb)   | 3       | 33388339  | 33440010  | 6571          | ENSG00000153560 | UBP1         |
| NR4A2_Medium | chr3    | 33535944  | 33536344  | Promoter (<=1kb)   | 3       | 33498584  | 33535448  | -496          | ENSG00000163539 | CLASP2       |
| NR4A2_Medium | chr3    | 33697210  | 33697610  | Promoter (8-9kb)   | 3       | 33682979  | 33688368  | -8842         | ENSG00000163539 | CLASP2       |
| NR4A2_Medium | chr3    | 36999927  | 37000327  | Promoter (5-6kb)   | 3       | 36994227  | 37011836  | 5700          | ENSG00000076242 | MLH1         |
| NR4A2_Medium | chr3    | 37286974  | 37287374  | Promoter (4-5kb)   | 3       | 37282183  | 37366750  | 4791          | ENSG00000144674 | GOLGA4       |
| NR4A2_Medium | chr3    | 37866554  | 37866954  | Promoter (4-5kb)   | 3       | 37862178  | 37947171  | 4376          | ENSG00000144677 | CTDSPL       |
| NR4A2_Medium | chr3    | 37991210  | 37991610  | Promoter (<=1kb)   | 3       | 37991134  | 37997187  | 76            | ENSG00000136059 | VILL         |
| NR4A2_Medium | chr3    | 38128062  | 38128462  | Promoter (1-2kb)   | 3       | 38122910  | 38126342  | -1720         | ENSG00000060971 | ACAA1        |
| NR4A2_Medium | chr3    | 38351712  | 38352112  | Promoter (4-5kb)   | 3       | 38346815  | 38413289  | 4897          | ENSG00000093217 | XYLB         |
| NR4A2_Medium | chr3    | 38458363  | 38458763  | Promoter (3-4kb)   | 3       | 38451027  | 38454820  | -3543         | ENSG00000229589 | ACVR2B-AS1   |
| NR4A2_Medium | chr3    | 38625427  | 38625827  | Promoter (7-8kb)   | 3       | 38629842  | 38633220  | 7393          | ENSG00000183873 | SCN5A        |
| NR4A2_Medium | chr3    | 39058520  | 39058920  | Promoter (6-7kb)   | 3       | 39052301  | 39074749  | 6219          | ENSG00000114742 | WDR48        |
| NR4A2_Medium | chr3    | 39163722  | 39164122  | Promoter (9-10kb)  | 3       | 39142338  | 39154562  | -9160         | ENSG00000144655 | CSRNP1       |
| NR4A2_Medium | chr3    | 39184955  | 39185355  | Promoter (7-8kb)   | 3       | 39183215  | 39192595  | 7240          | ENSG00000168334 | XIRP1        |
| NR4A2_Medium | chr3    | 39278617  | 39279017  | Promoter (1-2kb)   | 3       | 39263494  | 39280034  | 1017          | ENSG00000168329 | CX3CR1       |
| NR4A2_Medium | chr3    | 40377448  | 40377848  | Promoter (9-10kb)  | 3       | 40387184  | 40428744  | -9336         | ENSG00000168032 | ENTPD3       |
| NR4A2_Medium | chr3    | 41923081  | 41923481  | Promoter (7-8kb)   | 3       | 41907920  | 41915474  | -7607         | ENSG00000168038 | ULK4         |
| NR4A2_Medium | chr3    | 42165765  | 42166165  | Promoter (5-6kb)</ |         |           |           |               |                 |              |

| Condition    | peakChr | peakStart | peakEnd   | annotation        | geneChr | geneStart | geneEnd   | distanceToTSS | geneID          | geneSymbol   |
|--------------|---------|-----------|-----------|-------------------|---------|-----------|-----------|---------------|-----------------|--------------|
| NR4A2_Medium | chr3    | 46209773  | 46210173  | Promoter (1-2kb)  | 3       | 46201711  | 46208313  | -1460         | ENSG00000163823 | CCR1         |
| NR4A2_Medium | chr3    | 46250810  | 46251210  | Promoter (8-9kb)  | 3       | 46242461  | 46265221  | 8349          | ENSG00000183625 | CCR3         |
| NR4A2_Medium | chr3    | 46669257  | 46669657  | Promoter (4-5kb)  | 3       | 46671488  | 46674593  | 4936          | ENSG00000178038 | ALS2CL       |
| NR4A2_Medium | chr3    | 46677513  | 46677913  | Promoter (<=1kb)  | 3       | 46668997  | 46677455  | -58           | ENSG00000178038 | ALS2CL       |
| NR4A2_Medium | chr3    | 46699223  | 46699623  | Promoter (1-2kb)  | 3       | 46701392  | 46710886  | -1769         | ENSG00000181585 | TMIE         |
| NR4A2_Medium | chr3    | 46896150  | 46896550  | Promoter (3-4kb)  | 3       | 46892721  | 46898734  | 3429          | ENSG00000160801 | PTH1R        |
| NR4A2_Medium | chr3    | 48293783  | 48294183  | Promoter (2-3kb)  | 3       | 48290793  | 48291375  | -2408         | NA              | FCF1P2       |
| NR4A2_Medium | chr3    | 48653464  | 48653864  | Promoter (9-10kb) | 3       | 48636463  | 48662886  | 9022          | ENSG00000008300 | CELSR3       |
| NR4A2_Medium | chr3    | 48755379  | 48755779  | Promoter (3-4kb)  | 3       | 48744597  | 48752318  | -3061         | ENSG00000114302 | PRKAR2A      |
| NR4A2_Medium | chr3    | 48912447  | 48912847  | Promoter (5-6kb)  | 3       | 48918821  | 48961679  | -5974         | ENSG00000177479 | ARIH2        |
| NR4A2_Medium | chr3    | 49488476  | 49488876  | Promoter (3-4kb)  | 3       | 49492716  | 49510741  | -3840         | ENSG00000173402 | DAG1         |
| NR4A2_Medium | chr3    | 49517972  | 49518372  | Promoter (7-8kb)  | 3       | 49510224  | 49530911  | 7748          | ENSG00000173402 | DAG1         |
| NR4A2_Medium | chr3    | 49647775  | 49648175  | Promoter (4-5kb)  | 3       | 49643029  | 49651349  | 4746          | ENSG00000164061 | BSN          |
| NR4A2_Medium | chr3    | 49750314  | 49750714  | Promoter (1-2kb)  | 3       | 49738272  | 49748928  | -1386         | ENSG00000176095 | IP6K1        |
| NR4A2_Medium | chr3    | 49752173  | 49752573  | Promoter (3-4kb)  | 3       | 49738272  | 49748928  | -3245         | ENSG00000176095 | IP6K1        |
| NR4A2_Medium | chr3    | 49800362  | 49800762  | Promoter (<=1kb)  | 3       | 49790732  | 49799873  | -489          | ENSG00000187492 | CDHR4        |
| NR4A2_Medium | chr3    | 49922717  | 49923117  | Promoter (6-7kb)  | 3       | 49907160  | 49929526  | 6409          | ENSG00000164077 | MON1A        |
| NR4A2_Medium | chr3    | 50170616  | 50171016  | Promoter (2-3kb)  | 3       | 50173807  | 50176861  | -2791         | ENSG00000001617 | SEMA3F       |
| NR4A2_Medium | chr3    | 50191195  | 50191595  | Promoter (<=1kb)  | 3       | 50191610  | 50197696  | -15           | ENSG00000114349 | GNAT1        |
| NR4A2_Medium | chr3    | 50270032  | 50270432  | Promoter (<=1kb)  | 3       | 50270561  | 50277170  | -129          | ENSG00000012171 | SEMA3B       |
| NR4A2_Medium | chr3    | 50664591  | 50664991  | Promoter (9-10kb) | 3       | 50674927  | 51384198  | -9936         | ENSG00000088538 | DOCK3        |
| NR4A2_Medium | chr3    | 50670603  | 50671003  | Promoter (3-4kb)  | 3       | 50674927  | 51384198  | -3924         | ENSG00000088538 | DOCK3        |
| NR4A2_Medium | chr3    | 51474507  | 51474907  | Promoter (8-9kb)  | 3       | 51397842  | 51483838  | 8931          | ENSG00000145041 | DCAF1        |
| NR4A2_Medium | chr3    | 51682148  | 51682548  | Promoter (<=1kb)  | 3       | 51681461  | 51704317  | 687           | ENSG00000164081 | TEX264       |
| NR4A2_Medium | chr3    | 51704215  | 51704615  | Promoter (2-3kb)  | 3       | 51707068  | 51718613  | -2453         | ENSG00000164082 | GRM2         |
| NR4A2_Medium | chr3    | 52690512  | 52690912  | Promoter (<=1kb)  | 3       | 52690744  | 52690827  | 0             | ENSG00000238862 | SNORD19B     |
| NR4A2_Medium | chr3    | 52706475  | 52706875  | Promoter (<=1kb)  | 3       | 52706143  | 52708019  | 332           | ENSG00000114902 | SPCS1        |
| NR4A2_Medium | chr3    | 52845478  | 52845878  | Promoter (<=1kb)  | 3       | 52846463  | 52846552  | 674           | ENSG00000275789 | MIR8064      |
| NR4A2_Medium | chr3    | 53278196  | 53278596  | Promoter (9-10kb) | 3       | 53287366  | 53288361  | 9765          | ENSG00000272886 | DCP1A        |
| NR4A2_Medium | chr3    | 53805843  | 53806243  | Promoter (1-2kb)  | 3       | 53807511  | 53812385  | -1268         | ENSG00000157388 | CACNA1D      |
| NR4A2_Medium | chr3    | 55171861  | 55172261  | Promoter (5-6kb)  | 3       | 55178172  | 55189214  | -5911         | ENSG00000243572 | LINC02017    |
| NR4A2_Medium | chr3    | 56673163  | 56673563  | Promoter (<=1kb)  | 3       | 56671352  | 56673673  | 110           | ENSG00000163946 | TASOR        |
| NR4A2_Medium | chr3    | 56690740  | 56691140  | Promoter (7-8kb)  | 3       | 56622859  | 56683237  | -7503         | ENSG00000163946 | TASOR        |
| NR4A2_Medium | chr3    | 57141917  | 57142317  | Promoter (<=1kb)  | 3       | 57096178  | 57142491  | 174           | ENSG00000144730 | IL17RD       |
| NR4A2_Medium | chr3    | 57588975  | 57589375  | Promoter (7-8kb)  | 3       | 57575548  | 57597198  | 7823          | ENSG00000168374 | ARF4         |
| NR4A2_Medium | chr3    | 57601656  | 57602056  | Promoter (3-4kb)  | 3       | 57597796  | 57600927  | 3860          | ENSG00000272146 | ARF4-AS1     |
| NR4A2_Medium | chr3    | 57638492  | 57638892  | Promoter (5-6kb)  | 3       | 57630349  | 57633331  | -5161         | ENSG00000174839 | DENND6A      |
| NR4A2_Medium | chr3    | 57673100  | 57673500  | Promoter (6-7kb)  | 3       | 57657651  | 57666194  | -6906         | ENSG00000174839 | DENND6A      |
| NR4A2_Medium | chr3    | 57885533  | 57885933  | Promoter (4-5kb)  | 3       | 57889991  | 57912518  | -4058         | ENSG00000163681 | SLMAP        |
| NR4A2_Medium | chr3    | 58172897  | 58173297  | Promoter (2-3kb)  | 3       | 58162547  | 58170636  | -2261         | ENSG00000244161 | FLNB-AS1     |
| NR4A2_Medium | chr3    | 58293490  | 58293890  | Promoter (8-9kb)  | 3       | 58285197  | 58293658  | 8293          | ENSG00000163686 | ABHD6        |
| NR4A2_Medium | chr3    | 58649168  | 58649568  | Promoter (8-9kb)  | 3       | 58637155  | 58657696  | 8128          | ENSG00000198643 | FAM3D        |
| NR4A2_Medium | chr3    | 58661253  | 58661653  | Promoter (3-4kb)  | 3       | 58637142  | 58657766  | -3487         | ENSG00000198643 | FAM3D        |
| NR4A2_Medium | chr3    | 63231899  | 63232299  | Promoter (3-4kb)  | 3       | 63228315  | 63556696  | 3584          | ENSG00000163630 | SYNPR        |
| NR4A2_Medium | chr3    | 63904443  | 63904843  | Promoter (6-7kb)  | 3       | 63898399  | 64003453  | 6044          | ENSG00000163635 | ATXN7        |
| NR4A2_Medium | chr3    | 64057593  | 64057993  | Promoter (9-10kb) | 3       | 64067964  | 64103131  | -9971         | ENSG00000241111 | PRICKLE2-AS1 |
| NR4A2_Medium | chr3    | 64452032  | 64452432  | Promoter (6-7kb)  | 3       | 64182648  | 64445476  | -6556         | ENSG00000163637 | PRICKLE2     |
| NR4A2_Medium | chr3    | 66397304  | 66397704  | Promoter (6-7kb)  | 3       | 66380225  | 66404410  | 6706          | ENSG00000144749 | LRIG1        |
| NR4A2_Medium | chr3    | 69748640  | 69749040  | Promoter (9-10kb) | 3       | 69739482  | 69968336  | 9158          | ENSG00000187098 | MITF         |
| NR4A2_Medium | chr3    | 70013965  | 70014365  | Promoter (1-2kb)  | 3       | 70012354  | 70014763  | 1611          | ENSG00000240405 | SAMMSON      |
| NR4A2_Medium | chr3    | 71003648  | 71004048  | Promoter (<=1kb)  | 3       | 70968444  | 71003407  | -241          | ENSG00000114861 | FOXP1        |
| NR4A2_Medium | chr3    | 71478961  | 71479361  | Promoter (9-10kb) | 3       | 71318202  | 71469567  | -9394         | ENSG00000114861 | FOXP1        |
| NR4A2_Medium | chr3    | 71485696  | 71486096  | Promoter (7-8kb)  | 3       | 70959237  | 71493564  | 7468          | ENSG00000114861 | FOXP1        |
| NR4A2_Medium | chr3    | 72110365  | 72110765  | Promoter (9-10kb) | 3       | 72059438  | 72101074  | -9291         | ENSG00000241163 | LINC00877    |
| NR4A2_Medium | chr3    | 72793127  | 72793527  | Promoter (2-3kb)  | 3       | 72749277  | 72795590  | 2063          | ENSG00000144736 | SHQ1         |
| NR4A2_Medium | chr3    | 72904773  | 72905173  | Promoter (2-3kb)  | 3       | 72908022  | 72955181  | -2849         | ENSG00000172986 | GXYLT2       |
| NR4A2_Medium | chr3    | 74260596  | 74260996  | Promoter (6-7kb)  | 3       | 74264385  | 74267539  | 6543          | ENSG00000113805 | CNTN3        |
| NR4A2_Medium | chr3    | 75669066  | 75669466  | Promoter (2-3kb)  | 3       | 75672300  | 75742048  | -2803         | ENSG00000242516 | LINC00960    |
| NR4A2_Medium | chr3    | 79766906  | 79767306  | Promoter (<=1kb)  | 3       | 78597239  | 79767998  | 692           | ENSG00000169855 | ROBO1        |
| NR4A2_Medium | chr3    | 81747210  | 81747610  | Promoter (3-4kb)  | 3       | 81489933  | 81743629  | -3581         | ENSG00000114480 | GBE1         |
| NR4A2_Medium | chr3    | 94052968  | 94053368  | Promoter (9-10kb) | 3       | 94047836  | 94062841  | 9473          | ENSG00000178700 | DHFR2        |
| NR4A2_Medium | chr3    | 97924237  | 97924637  | Promoter (<=1kb)  | 3       | 97924212  | 97944957  | 25            | ENSG00000080200 | CRYBG3       |
| NR4A2_Medium | chr3    | 98393154  | 98393554  | Promoter (2-3kb)  | 3       | 98390666  | 98391631  | 2488          | ENSG00000206536 | OR5K3        |
| NR4A2_Medium | chr3    | 98533101  | 98533501  | Promoter (1-2kb)  | 3       | 98531978  | 98534681  | 1123          | ENSG00000154165 | GPR15        |
| NR4A2_Medium | chr3    | 98575879  | 98576279  | Promoter (9-10kb) | 3       | 98521133  | 98585498  | 9219          | ENSG00000080822 | CLDND1       |
| NR4A2_Medium | chr3    | 98762636  | 98763036  | Promoter (<=1kb)  | 3       | 98763309  | 98782500  | -273          | ENSG00000064225 | ST3GAL6      |
| NR4A2_Medium | chr3    | 98799975  | 98800375  | Promoter (1-2kb)  | 3       | 98799836  | 98801971  | 1596          | ENSG00000057019 | DCBLD2       |
| NR4A2_Medium | chr3    | 100177778 | 100181778 | Promoter (1-2kb)  | 3       | 100176238 | 100178603 | 1540          | ENSG00000184220 | CMSS1        |
| NR4A2_Medium | chr3    | 100394582 | 100398582 | Promoter (6-7kb)  | 3       | 100363431 | 100401089 | 6107          | ENSG00000154174 | TOMM70       |
| NR4A2_Medium | chr3    | 100609977 | 100613977 | Promoter (<=1kb)  | 3       | 100609601 | 100695479 | 376           | ENSG00000144820 | ADGRG7       |
| NR4A2_Medium | chr3    | 100872477 | 100876477 | Promoter (5-6kb)  | 3       | 100813661 | 100866956 | -5521         | ENSG00000154175 | ABI3BP       |
| NR4A2_Medium | chr3    | 100878663 | 100882663 | Promoter (6-7kb)  | 3       | 100862311 | 100885578 | 6515          | ENSG00000154175 | ABI3BP       |
| NR4A2_Medium | chr3    | 101317530 | 101321530 | Promoter (2-3kb)  | 3       | 101222546 | 101320575 | 2645          | ENSG00000081148 | IMPG2        |
| NR4A2_Medium | chr3    | 101736781 | 101740781 | Promoter (4-5kb)  | 3       | 101732611 | 101755478 | 4170          | ENSG00000182504 | CEP97        |
| NR4A2_Medium | chr3    | 101841992 | 101845992 | Promoter (7-8kb)  | 3       | 101849514 | 101859523 | -7122         | ENSG00000144802 | NFKBIZ       |
| NR4A2_Medium | chr3    | 101968769 | 101972769 | Promoter (8-9kb)  | 3       | 101960386 | 101996532 | 8383          | ENSG00000214407 | LINC02085    |
| NR4A2_Medium | chr3    | 107785215 | 107789215 | Promoter (6-7kb)  | 3       | 107778503 | 107798671 | 6712          | ENSG00000114439 | BBX          |
| NR4A2_Medium | chr3    | 108525659 | 108529659 | Promoter (3-4kb)  | 3       | 108380368 | 108529322 | 3263          | ENSG00000144821 | MYH15        |
| NR4A2_Medium | chr3    | 109133044 | 109137044 | Promoter (3-4kb)  | 3       | 109136714 | 109150123 | -3270         | ENSG00000241224 | C3orf85      |
| NR4A2_Medium | chr3    | 109320801 | 109324801 | Promoter (4-5kb)  | 3       | 109293788 | 109316517 | -4284         | ENSG00000163530 | DPPA2        |
| NR4A2_Medium | chr3    | 112635610 | 112639610 | Promoter (2-3kb)  | 3       | 112605600 | 112638097 | 2087          | ENSG00000091986 | CCDC80       |
| NR4A2_Medium | chr3    | 112839281 | 112843281 | Promoter (6-7kb)  | 3       | 112815788 | 112845943 | 6262          | ENSG00000206531 | CD200R1L     |
| NR4A2_Medium | chr3    | 113403405 | 113407405 | Promoter (<=1kb)  | 3       | 113399968 | 113403878 | 73            | ENSG00000206530 | CFAP44       |
| NR4A2_Medium | chr3    | 113683696 | 113687696 | Promoter (8-9kb)  | 3       | 113653239 | 113674896 | -8800         | ENSG00000176542 | USF3         |
| NR4A2_Medium | chr3    | 113934600 | 113938600 | Promoter (<=1kb)  | 3       | 113934487 | 113936923 | 113           | ENSG00000178075 | GRAMD1C      |
| NR4A2_Medium | chr3    | 114352159 | 114356159 | Promoter (<=1kb)  | 3       | 114351835 | 114388970 | 324           | ENSG00000241560 | ZBTB20-AS1   |
| NR4A2_Medium | chr3    | 115078558 | 115082558 | Promoter (7-8kb)  | 3       | 114338094 | 115071375 | -7183         | ENSG00000181722 | ZBTB20       |
| NR4A2_Medium | chr3    | 116841325 | 116845325 | Promoter (8-9kb)  | 3       | 116850277 | 116850367 | 8642          | ENSG00000265433 | MIR4447      |
| NR4A2_Medium | chr3    | 116846818 | 116850818 | Promoter (3-4kb)  | 3       | 116850277 | 116850367 | 3149          | ENSG00000265433 | MIR4447      |
| NR4A2_Medium | chr3    | 119153413 | 119157413 | Promoter (6-7kb)  | 3       | 119147375 | 119187807 | 6038          | ENSG00000163424 | TEX55        |
| NR4A2_Medium | chr3    | 119658802 | 119662802 | Promoter (1-2kb)  | 3       | 119648441 | 119660585 | 1383          | ENSG00000121577 | POPCD2       |
| NR4A2_Medium | chr3    | 122569445 | 122573445 | Promoter (4-5kb)  | 3       | 122527959 | 122564577 | -4868         | ENSG00000138496 | PARP9        |
| NR4A2_Medium | chr3    | 122573227 | 122577227 | Promoter (4-5kb)  | 3       | 122577628 | 122639047 | -4001         | ENSG00000173200 | PARP15       |
| NR4A2_Medium | chr3    | 123131419 | 123135419 | Promoter (7-8kb)  | 3       | 123124066 | 123146258 | 7353          | ENSG00000065485 | PDIA5        |
| NR4A2_Medium | chr3    | 123198610 | 123202610 | Promoter (2-      |         |           |           |               |                 |              |



| Condition    | peakChr | peakStart | peakEnd   | annotation        | geneChr | geneStart | geneEnd   | distanceToTSS | geneID          | geneSymbol   |
|--------------|---------|-----------|-----------|-------------------|---------|-----------|-----------|---------------|-----------------|--------------|
| NR4A2_Medium | chr3    | 126352234 | 126352634 | Promoter (1-2kb)  | 3       | 126352675 | 126354285 | 1651          | ENSG00000163884 | KLF15        |
| NR4A2_Medium | chr3    | 126556801 | 126557201 | Promoter (1-2kb)  | 3       | 126549692 | 126558932 | 1731          | ENSG00000180697 | C3orf22      |
| NR4A2_Medium | chr3    | 126863647 | 126864108 | Promoter (8-9kb)  | 3       | 126854864 | 126949879 | 8783          | ENSG00000159685 | CHCHD6       |
| NR4A2_Medium | chr3    | 127282354 | 127282754 | Promoter (5-6kb)  | 3       | 127283784 | 127288046 | 5292          | ENSG00000239620 | PRR20G       |
| NR4A2_Medium | chr3    | 127516782 | 127517182 | Promoter (5-6kb)  | 3       | 127480696 | 127522618 | 5436          | ENSG00000239921 | LINC01471    |
| NR4A2_Medium | chr3    | 127584208 | 127584608 | Promoter (2-3kb)  | 3       | 127587111 | 127587176 | 2568          | ENSG00000276083 | MIR7976      |
| NR4A2_Medium | chr3    | 127620485 | 127620885 | Promoter (2-3kb)  | 3       | 127617711 | 127621776 | 2774          | ENSG00000073111 | MCM2         |
| NR4A2_Medium | chr3    | 127706351 | 127706751 | Promoter (7-8kb)  | 3       | 127692112 | 127714146 | 7395          | ENSG00000074416 | MGLL         |
| NR4A2_Medium | chr3    | 128630114 | 128630514 | Promoter (2-3kb)  | 3       | 128625974 | 128627266 | -2848         | ENSG00000163902 | RPN1         |
| NR4A2_Medium | chr3    | 128674716 | 128675116 | Promoter (5-6kb)  | 3       | 128620159 | 128681075 | 5959          | ENSG00000163902 | RPN1         |
| NR4A2_Medium | chr3    | 128910283 | 128910683 | Promoter (5-6kb)  | 3       | 128904376 | 128913100 | 5907          | ENSG00000177646 | ACAD9        |
| NR4A2_Medium | chr3    | 128974376 | 128974776 | Promoter (3-4kb)  | 3       | 128971324 | 128978315 | 3539          | ENSG00000114656 | CFAP92       |
| NR4A2_Medium | chr3    | 129116367 | 129116767 | Promoter (5-6kb)  | 3       | 129090494 | 129121781 | 5014          | ENSG00000172780 | RAB43        |
| NR4A2_Medium | chr3    | 129270162 | 129270562 | Promoter (1-2kb)  | 3       | 129272146 | 129272243 | -1584         | ENSG00000278658 | MIR6826      |
| NR4A2_Medium | chr3    | 129394372 | 129394772 | Promoter (1-2kb)  | 3       | 129393172 | 129396293 | 1521          | ENSG00000251474 | RPL32P3      |
| NR4A2_Medium | chr3    | 129403983 | 129404383 | Promoter (4-5kb)  | 3       | 129396196 | 129399655 | -4328         | ENSG00000251474 | RPL32P3      |
| NR4A2_Medium | chr3    | 129515803 | 129516203 | Promoter (3-4kb)  | 3       | 129512381 | 129514820 | 3422          | ENSG00000163913 | IFT122       |
| NR4A2_Medium | chr3    | 129572065 | 129572465 | Promoter (<=1kb)  | 3       | 129570872 | 129571858 | -207          | ENSG00000004399 | PLXND1       |
| NR4A2_Medium | chr3    | 129980025 | 129980425 | Promoter (5-6kb)  | 3       | 129974720 | 129977935 | 5305          | ENSG00000170893 | TRH          |
| NR4A2_Medium | chr3    | 131019415 | 131019815 | Promoter (4-5kb)  | 3       | 131016291 | 131024450 | 4635          | ENSG00000034533 | ASTE1        |
| NR4A2_Medium | chr3    | 133693815 | 133694215 | Promoter (5-6kb)  | 3       | 133688192 | 133712802 | 5623          | ENSG00000091513 | TF           |
| NR4A2_Medium | chr3    | 133799089 | 133799489 | Promoter (6-7kb)  | 3       | 133805615 | 133807774 | -6126         | ENSG00000144867 | SRPRB        |
| NR4A2_Medium | chr3    | 134478699 | 134479099 | Promoter (4-5kb)  | 3       | 134478478 | 134483253 | 4154          | ENSG00000129055 | ANAPC13      |
| NR4A2_Medium | chr3    | 136254336 | 136254736 | Promoter (<=1kb)  | 3       | 136255307 | 136262025 | -571          | ENSG00000114054 | PCCB         |
| NR4A2_Medium | chr3    | 136367442 | 136367842 | Promoter (8-9kb)  | 3       | 136348789 | 136359189 | -8253         | ENSG00000118007 | STAG1        |
| NR4A2_Medium | chr3    | 136812044 | 136812444 | Promoter (6-7kb)  | 3       | 136819084 | 136855888 | -6640         | ENSG00000168917 | SLC35G2      |
| NR4A2_Medium | chr3    | 138103182 | 138103582 | Promoter (<=1kb)  | 3       | 138092352 | 138103778 | 196           | ENSG00000158163 | DZIP1L       |
| NR4A2_Medium | chr3    | 138137378 | 138137778 | Promoter (4-5kb)  | 3       | 138123713 | 138132390 | -4988         | ENSG00000118017 | A4GNT        |
| NR4A2_Medium | chr3    | 138316172 | 138316572 | Promoter (3-4kb)  | 3       | 138303271 | 138319580 | 3008          | ENSG00000181322 | NME9         |
| NR4A2_Medium | chr3    | 138358799 | 138359199 | Promoter (9-10kb) | 3       | 138349262 | 138402362 | 9537          | ENSG00000158186 | MRAS         |
| NR4A2_Medium | chr3    | 138493271 | 138493671 | Promoter (6-7kb)  | 3       | 138496910 | 138500180 | 6509          | ENSG00000114107 | CEP70        |
| NR4A2_Medium | chr3    | 138669246 | 138669646 | Promoter (5-6kb)  | 3       | 138657283 | 138663933 | -5313         | ENSG00000051382 | PIK3CB       |
| NR4A2_Medium | chr3    | 139018346 | 139018746 | Promoter (2-3kb)  | 3       | 139019031 | 139020926 | 2180          | ENSG00000184814 | PRR23B       |
| NR4A2_Medium | chr3    | 139021450 | 139021850 | Promoter (<=1kb)  | 3       | 139019031 | 139020926 | -524          | ENSG00000184814 | PRR23B       |
| NR4A2_Medium | chr3    | 140969352 | 140969752 | Promoter (<=1kb)  | 3       | 140970365 | 140976647 | -613          | ENSG00000114120 | SLC25A36     |
| NR4A2_Medium | chr3    | 140976391 | 140976791 | Promoter (2-3kb)  | 3       | 140973666 | 140976463 | 2725          | ENSG00000114120 | SLC25A36     |
| NR4A2_Medium | chr3    | 141401306 | 141401706 | Promoter (<=1kb)  | 3       | 141402349 | 141442826 | -643          | ENSG00000177311 | ZBTB38       |
| NR4A2_Medium | chr3    | 141957470 | 141957870 | Promoter (5-6kb)  | 3       | 141952829 | 141963835 | 5965          | ENSG00000114126 | TFDP2        |
| NR4A2_Medium | chr3    | 142037573 | 142037973 | Promoter (8-9kb)  | 3       | 141963852 | 142029157 | -8416         | ENSG00000114126 | TFDP2        |
| NR4A2_Medium | chr3    | 142119108 | 142119508 | Promoter (6-7kb)  | 3       | 141995071 | 142126370 | 6862          | ENSG00000114126 | TFDP2        |
| NR4A2_Medium | chr3    | 142180904 | 142181304 | Promoter (<=1kb)  | 3       | 142170183 | 142181470 | 166           | ENSG00000175066 | GK5          |
| NR4A2_Medium | chr3    | 142423611 | 142424011 | Promoter (1-2kb)  | 3       | 142376249 | 142425535 | 1524          | ENSG00000114127 | XRN1         |
| NR4A2_Medium | chr3    | 142511310 | 142511710 | Promoter (1-2kb)  | 3       | 142449333 | 142513605 | 1895          | ENSG00000175054 | ATR          |
| NR4A2_Medium | chr3    | 143348874 | 143349274 | Promoter (6-7kb)  | 3       | 143342246 | 143347071 | 6628          | ENSG00000240012 | SLC9A9-AS1   |
| NR4A2_Medium | chr3    | 143981430 | 143981830 | Promoter (7-8kb)  | 3       | 143973608 | 143992367 | 7822          | ENSG00000181744 | DIPK2A       |
| NR4A2_Medium | chr3    | 146911971 | 146912371 | Promoter (9-10kb) | 3       | 146921795 | 146925357 | -9424         | ENSG00000242671 | LINC02010    |
| NR4A2_Medium | chr3    | 148986069 | 148986469 | Promoter (4-5kb)  | 3       | 148991341 | 149027632 | -4872         | ENSG00000163754 | GYG1         |
| NR4A2_Medium | chr3    | 149002180 | 149002580 | Promoter (1-2kb)  | 3       | 149003954 | 149027347 | -1374         | ENSG00000163754 | GYG1         |
| NR4A2_Medium | chr3    | 149195549 | 149195949 | Promoter (2-3kb)  | 3       | 149185249 | 149198453 | 2504          | ENSG00000047457 | CP           |
| NR4A2_Medium | chr3    | 150017711 | 150018111 | Promoter (4-5kb)  | 3       | 149964904 | 150022799 | 4688          | ENSG00000070087 | PFN2         |
| NR4A2_Medium | chr3    | 153378547 | 153378947 | Promoter (8-9kb)  | 3       | 153384934 | 153387368 | 8421          | NA              | LINC02006    |
| NR4A2_Medium | chr3    | 153753923 | 153754323 | Promoter (8-9kb)  | 3       | 153385109 | 153762526 | 8203          | NA              | LINC02006    |
| NR4A2_Medium | chr3    | 154109782 | 154110182 | Promoter (<=1kb)  | 3       | 154026578 | 154110351 | 169           | ENSG00000243069 | ARHGFE26-AS1 |
| NR4A2_Medium | chr3    | 154327286 | 154327686 | Promoter (2-3kb)  | 3       | 154272546 | 154324487 | -2799         | ENSG00000174953 | DHX36        |
| NR4A2_Medium | chr3    | 155231034 | 155231434 | Promoter (9-10kb) | 3       | 155240919 | 155243124 | -9485         | ENSG00000241336 | LINC01487    |
| NR4A2_Medium | chr3    | 157505687 | 157506087 | Promoter (2-3kb)  | 3       | 157459622 | 157503626 | -2061         | ENSG00000197415 | VEPH1        |
| NR4A2_Medium | chr3    | 158571637 | 158572037 | Promoter (<=1kb)  | 3       | 158571567 | 158605402 | 70            | ENSG00000178053 | MLF1         |
| NR4A2_Medium | chr3    | 158589408 | 158589808 | Promoter (6-7kb)  | 3       | 158582835 | 158606459 | 6573          | ENSG00000178053 | MLF1         |
| NR4A2_Medium | chr3    | 158653959 | 158654359 | Promoter (1-2kb)  | 3       | 158652198 | 158657518 | 1761          | ENSG00000168827 | GFM1         |
| NR4A2_Medium | chr3    | 160019980 | 160020380 | Promoter (3-4kb)  | 3       | 160016024 | 160031423 | 3956          | NA              | LINC01100    |
| NR4A2_Medium | chr3    | 160439510 | 160439910 | Promoter (8-9kb)  | 3       | 160430929 | 160432443 | 8581          | ENSG00000113810 | SMC4         |
| NR4A2_Medium | chr3    | 160450667 | 160451067 | Promoter (<=1kb)  | 3       | 160227454 | 160449829 | -838          | ENSG00000248710 | TRIM59-IFT80 |
| NR4A2_Medium | chr3    | 160485581 | 160485981 | Promoter (<=1kb)  | 3       | 160439001 | 160485773 | 0             | ENSG00000248710 | TRIM59-IFT80 |
| NR4A2_Medium | chr3    | 163283851 | 163284251 | Promoter (5-6kb)  | 3       | 163199578 | 163278573 | -5278         | ENSG00000241369 | LINC01192    |
| NR4A2_Medium | chr3    | 165192306 | 165192706 | Promoter (3-4kb)  | 3       | 165186720 | 165196384 | 3678          | ENSG00000121871 | SLITRK3      |
| NR4A2_Medium | chr3    | 165196158 | 165196558 | Promoter (<=1kb)  | 3       | 165186720 | 165196384 | 0             | ENSG00000121871 | SLITRK3      |
| NR4A2_Medium | chr3    | 167397821 | 167398221 | Promoter (5-6kb)  | 3       | 167392796 | 167408519 | 5025          | ENSG00000241669 | LINC01327    |
| NR4A2_Medium | chr3    | 167628159 | 167628559 | Promoter (6-7kb)  | 3       | 167478687 | 167621643 | -6516         | ENSG00000174776 | WDR49        |
| NR4A2_Medium | chr3    | 167894080 | 167894480 | Promoter (1-2kb)  | 3       | 167895948 | 167924011 | -1468         | ENSG00000244227 | LRRC77P      |
| NR4A2_Medium | chr3    | 168088879 | 168089279 | Promoter (6-7kb)  | 3       | 168010235 | 168095344 | 6065          | ENSG00000173905 | GOLIM4       |
| NR4A2_Medium | chr3    | 168101619 | 168102019 | Promoter (5-6kb)  | 3       | 168008689 | 168095924 | -5695         | ENSG00000173905 | GOLIM4       |
| NR4A2_Medium | chr3    | 169118550 | 169118950 | Promoter (3-4kb)  | 3       | 169120888 | 169122672 | 3722          | ENSG00000085276 | MECOM        |
| NR4A2_Medium | chr3    | 169902988 | 169903388 | Promoter (8-9kb)  | 3       | 169911572 | 169939175 | -8184         | ENSG00000187033 | SAMD7        |
| NR4A2_Medium | chr3    | 170374527 | 170374927 | Promoter (6-7kb)  | 3       | 170381276 | 170385049 | -6349         | ENSG00000136603 | SKIL         |
| NR4A2_Medium | chr3    | 172309916 | 172310316 | Promoter (2-3kb)  | 3       | 172306936 | 172310927 | 2980          | ENSG00000075420 | FNDC3B       |
| NR4A2_Medium | chr3    | 173402639 | 173403039 | Promoter (4-5kb)  | 3       | 173398448 | 174286644 | 4191          | ENSG00000169760 | NLGN1        |
| NR4A2_Medium | chr3    | 174444473 | 174444873 | Promoter (3-4kb)  | 3       | 174440987 | 175097142 | 3486          | ENSG00000177694 | NAALADL2     |
| NR4A2_Medium | chr3    | 177616760 | 177617160 | Promoter (<=1kb)  | 3       | 177617590 | 177752094 | -430          | ENSG00000228221 | LINC00578    |
| NR4A2_Medium | chr3    | 179456793 | 179457193 | Promoter (5-6kb)  | 3       | 179416521 | 179451476 | -5317         | ENSG00000114450 | GNB4         |
| NR4A2_Medium | chr3    | 180651732 | 180652132 | Promoter (<=1kb)  | 3       | 180614244 | 180652521 | 389           | ENSG00000284862 | CCDC39       |
| NR4A2_Medium | chr3    | 180694587 | 180694987 | Promoter (9-10kb) | 3       | 180643945 | 180684942 | -9645         | ENSG00000284862 | CCDC39       |
| NR4A2_Medium | chr3    | 180859927 | 180860327 | Promoter (7-8kb)  | 3       | 180868141 | 180949326 | -7814         | ENSG00000114416 | FXR1         |
| NR4A2_Medium | chr3    | 180866297 | 180866697 | Promoter (1-2kb)  | 3       | 180868141 | 180949326 | -1444         | ENSG00000114416 | FXR1         |
| NR4A2_Medium | chr3    | 180920139 | 180920539 | Promoter (4-5kb)  | 3       | 180915460 | 180948742 | 4679          | ENSG00000114416 | FXR1         |
| NR4A2_Medium | chr3    | 180966453 | 180966853 | Promoter (1-2kb)  | 3       | 180968051 | 180976282 | -1198         | ENSG00000114416 | FXR1         |
| NR4A2_Medium | chr3    | 181166834 | 181167234 | Promoter (7-8kb)  | 3       | 181174890 | 181700044 | -7656         | ENSG00000242808 | SOX2-OT      |
| NR4A2_Medium | chr3    | 183113385 | 183113785 | Promoter (2-3kb)  | 3       | 183015218 | 183116075 | 2290          | ENSG00000078070 | MCCC1        |
| NR4A2_Medium | chr3    | 183879124 | 183879524 | Promoter (5-6kb)  | 3       | 183833768 | 183884727 | 5203          | ENSG00000175193 | PARL         |
| NR4A2_Medium | chr3    | 183991503 | 183991903 | Promoter (7-8kb)  | 3       | 183977518 | 183983576 | -7927         | ENSG00000114770 | ABCC5        |
| NR4A2_Medium | chr3    | 184196134 | 184196534 | Promoter (2-3kb)  | 3       | 184193150 | 184193769 | 2984          | ENSG00000161204 | ABCF3        |
| NR4A2_Medium | chr3    | 184325517 | 184325917 | Promoter (<=1kb)  | 3       | 184325696 | 184325771 | 0             | ENSG00000212158 | SNORD66      |
| NR4A2_Medium | chr3    | 184580539 | 184580939 | Promoter (<=1kb)  | 3       | 184579748 | 184580700 | 791           | ENSG00000182580 | EPHB3        |
| NR4A2_Medium | chr3    | 185559174 | 185559574 | Promoter (6-7kb)  | 3       |           |           |               |                 |              |

| Condition    | peakChr | peakStart | peakEnd   | annotation        | geneChr | geneStart | geneEnd   | distanceToTSS | geneID          | geneSymbol |
|--------------|---------|-----------|-----------|-------------------|---------|-----------|-----------|---------------|-----------------|------------|
| NR4A2_Medium | chr3    | 192243228 | 192243628 | Promoter (4-5kb)  | 3       | 192238630 | 192283097 | 4598          | ENSG00000231383 | FGF12-AS1  |
| NR4A2_Medium | chr3    | 192411886 | 192412286 | Promoter (2-3kb)  | 3       | 192142509 | 192409049 | -2837         | ENSG00000114279 | FGF12      |
| NR4A2_Medium | chr3    | 192911513 | 192911913 | Promoter (5-6kb)  | 3       | 192796815 | 192917856 | 5943          | ENSG00000180611 | MB21D2     |
| NR4A2_Medium | chr3    | 193649690 | 193650090 | Promoter (<=1kb)  | 3       | 193648766 | 193659514 | 924           | ENSG00000198836 | OPA1       |
| NR4A2_Medium | chr3    | 194071228 | 194071628 | Promoter (<=1kb)  | 3       | 194009449 | 194071025 | -203          | ENSG00000230102 | LINC02028  |
| NR4A2_Medium | chr3    | 194243421 | 194243821 | Promoter (3-4kb)  | 3       | 194247638 | 194258816 | -3817         | ENSG00000238097 | LINC02037  |
| NR4A2_Medium | chr3    | 194324539 | 194324939 | Promoter (1-2kb)  | 3       | 194301199 | 194322871 | -1668         | ENSG00000214145 | LINC00887  |
| NR4A2_Medium | chr3    | 194684304 | 194684704 | Promoter (1-2kb)  | 3       | 194685883 | 194689037 | -1179         | ENSG00000185112 | FAM43A     |
| NR4A2_Medium | chr3    | 195082647 | 195083047 | Promoter (4-5kb)  | 3       | 195069593 | 195087372 | 4325          | ENSG00000173950 | XXYL1      |
| NR4A2_Medium | chr3    | 195137596 | 195137996 | Promoter (3-4kb)  | 3       | 195134506 | 195134580 | -3016         | ENSG00000265333 | MIR3137    |
| NR4A2_Medium | chr3    | 195251451 | 195251851 | Promoter (3-4kb)  | 3       | 195069677 | 195247920 | -3531         | ENSG00000173950 | XXYL1      |
| NR4A2_Medium | chr3    | 195265194 | 195265594 | Promoter (5-6kb)  | 3       | 195180394 | 195260080 | -5114         | ENSG00000173950 | XXYL1      |
| NR4A2_Medium | chr3    | 196076185 | 196076585 | Promoter (5-6kb)  | 3       | 196049284 | 196082090 | 5505          | ENSG00000072274 | TFRC       |
| NR4A2_Medium | chr3    | 196424575 | 196424975 | Promoter (6-7kb)  | 3       | 196431385 | 196432530 | -6410         | NA              | UBXN7-AS1  |
| NR4A2_Medium | chr3    | 196560126 | 196560526 | Promoter (6-7kb)  | 3       | 196560996 | 196567310 | 6784          | ENSG00000185798 | WDR53      |
| NR4A2_Medium | chr3    | 196994813 | 196995262 | Promoter (4-5kb)  | 3       | 196999460 | 197004736 | -4198         | ENSG00000228109 | MELTF-AS1  |
| NR4A2_Medium | chr3    | 197003539 | 197003939 | Promoter (<=1kb)  | 3       | 197003637 | 197004738 | 0             | ENSG00000228109 | MELTF-AS1  |
| NR4A2_Medium | chr3    | 197302415 | 197302815 | Promoter (1-2kb)  | 3       | 197300575 | 197303755 | 1840          | ENSG00000227375 | DLG1-AS1   |
| NR4A2_Medium | chr3    | 197739015 | 197739415 | Promoter (1-2kb)  | 3       | 197737179 | 197777001 | 1836          | ENSG00000122068 | FYTTD1     |
| NR4A2_Medium | chr3    | 197799520 | 197799920 | Promoter (8-9kb)  | 3       | 197791274 | 197871585 | 8246          | ENSG00000186001 | LRCH3      |
| NR4A2_Medium | chr3    | 197876210 | 197876610 | Promoter (<=1kb)  | 3       | 197875694 | 197883685 | 516           | ENSG00000186001 | LRCH3      |
| NR4A2_Medium | chr4    | 205895    | 206295    | Promoter (6-7kb)  | 4       | 212610    | 255985    | -6315         | ENSG00000198155 | ZNF876P    |
| NR4A2_Medium | chr4    | 651881    | 652281    | Promoter (<=1kb)  | 4       | 651985    | 654288    | 0             | ENSG00000133256 | PDE6B      |
| NR4A2_Medium | chr4    | 665058    | 665458    | Promoter (<=1kb)  | 4       | 664910    | 670314    | 148           | ENSG00000133256 | PDE6B      |
| NR4A2_Medium | chr4    | 821935    | 822335    | Promoter (3-4kb)  | 4       | 784958    | 826092    | 3757          | ENSG00000168993 | CPLX1      |
| NR4A2_Medium | chr4    | 869004    | 869404    | Promoter (<=1kb)  | 4       | 849278    | 869957    | 553           | ENSG00000178950 | GAK        |
| NR4A2_Medium | chr4    | 892135    | 892535    | Promoter (2-3kb)  | 4       | 885783    | 894827    | 2292          | ENSG00000178950 | GAK        |
| NR4A2_Medium | chr4    | 898927    | 899327    | Promoter (4-5kb)  | 4       | 885783    | 894827    | -4100         | ENSG00000178950 | GAK        |
| NR4A2_Medium | chr4    | 930713    | 931113    | Promoter (1-2kb)  | 4       | 849676    | 932187    | 1074          | ENSG00000178950 | GAK        |
| NR4A2_Medium | chr4    | 1060976   | 1061376   | Promoter (2-3kb)  | 4       | 1056250   | 1058427   | -2549         | ENSG00000178222 | RNF212     |
| NR4A2_Medium | chr4    | 1211257   | 1211657   | Promoter (1-2kb)  | 4       | 1210120   | 1218591   | 1137          | ENSG00000280927 | CTBP1-AS   |
| NR4A2_Medium | chr4    | 1215516   | 1215916   | Promoter (<=1kb)  | 4       | 1213991   | 1216407   | 491           | ENSG00000159692 | CTBP1      |
| NR4A2_Medium | chr4    | 1230083   | 1230483   | Promoter (<=1kb)  | 4       | 1214421   | 1231144   | 661           | ENSG00000159692 | CTBP1      |
| NR4A2_Medium | chr4    | 1311994   | 1312394   | Promoter (2-3kb)  | 4       | 1309787   | 1339281   | 2207          | ENSG00000090316 | MAEA       |
| NR4A2_Medium | chr4    | 1744075   | 1744475   | Promoter (<=1kb)  | 4       | 1744439   | 1745076   | 0             | ENSG00000013810 | TACC3      |
| NR4A2_Medium | chr4    | 2178037   | 2178437   | Promoter (<=1kb)  | 4       | 2071950   | 2179387   | 950           | ENSG00000130997 | POLN       |
| NR4A2_Medium | chr4    | 2268204   | 2268604   | Promoter (3-4kb)  | 4       | 2270918   | 2271751   | 3147          | ENSG00000159733 | ZFYVE28    |
| NR4A2_Medium | chr4    | 2447715   | 2448115   | Promoter (4-5kb)  | 4       | 2443215   | 2450356   | 4500          | ENSG00000206113 | CFAP99     |
| NR4A2_Medium | chr4    | 2794566   | 2794966   | Promoter (<=1kb)  | 4       | 2794159   | 2824914   | 407           | ENSG00000087266 | SH3BP2     |
| NR4A2_Medium | chr4    | 3025031   | 3025431   | Promoter (2-3kb)  | 4       | 3027911   | 3038878   | -2480         | ENSG00000125388 | GRK4       |
| NR4A2_Medium | chr4    | 3461781   | 3462181   | Promoter (1-2kb)  | 4       | 3463306   | 3494482   | -1125         | ENSG00000175920 | DOK7       |
| NR4A2_Medium | chr4    | 3674605   | 3675005   | Promoter (2-3kb)  | 4       | 3673593   | 3677855   | 2850          | ENSG00000250632 | LINC02171  |
| NR4A2_Medium | chr4    | 3677985   | 3678385   | Promoter (<=1kb)  | 4       | 3673593   | 3677855   | -130          | ENSG00000250632 | LINC02171  |
| NR4A2_Medium | chr4    | 5041950   | 5042350   | Promoter (9-10kb) | 4       | 5051480   | 5500989   | -9130         | ENSG00000152953 | STK32B     |
| NR4A2_Medium | chr4    | 5202562   | 5202962   | Promoter (1-2kb)  | 4       | 5204079   | 5345455   | -1117         | ENSG00000152953 | STK32B     |
| NR4A2_Medium | chr4    | 5924952   | 5925352   | Promoter (1-2kb)  | 4       | 5923275   | 5923328   | -1624         | ENSG00000263631 | MIR378D1   |
| NR4A2_Medium | chr4    | 6299509   | 6299909   | Promoter (4-5kb)  | 4       | 6294771   | 6300807   | 4738          | ENSG00000109501 | WFS1       |
| NR4A2_Medium | chr4    | 6387339   | 6387739   | Promoter (2-3kb)  | 4       | 6333646   | 6384826   | -2513         | ENSG00000074211 | PPP2R2C    |
| NR4A2_Medium | chr4    | 6413933   | 6414333   | Promoter (6-7kb)  | 4       | 6323046   | 6421118   | 6785          | ENSG00000074211 | PPP2R2C    |
| NR4A2_Medium | chr4    | 6463240   | 6463640   | Promoter (8-9kb)  | 4       | 6380033   | 6471686   | 8046          | ENSG00000074211 | PPP2R2C    |
| NR4A2_Medium | chr4    | 6646566   | 6646966   | Promoter (5-6kb)  | 4       | 6640691   | 6642745   | 5875          | ENSG00000179010 | MRFAP1     |
| NR4A2_Medium | chr4    | 6660214   | 6660614   | Promoter (2-3kb)  | 4       | 6663396   | 6676755   | -2782         | ENSG00000170846 | LOC93622   |
| NR4A2_Medium | chr4    | 6690277   | 6690677   | Promoter (<=1kb)  | 4       | 6687448   | 6690519   | 0             | ENSG00000246526 | LINC02481  |
| NR4A2_Medium | chr4    | 6910435   | 6910835   | Promoter (<=1kb)  | 4       | 6910248   | 6923559   | 187           | ENSG00000132405 | TBC1D14    |
| NR4A2_Medium | chr4    | 7033825   | 7034225   | Promoter (7-8kb)  | 4       | 7041899   | 7054431   | -7674         | ENSG00000173011 | TADA2B     |
| NR4A2_Medium | chr4    | 7467289   | 7467689   | Promoter (7-8kb)  | 4       | 7460028   | 7460118   | 7261          | ENSG00000266690 | MIR4274    |
| NR4A2_Medium | chr4    | 7760451   | 7760851   | Promoter (6-7kb)  | 4       | 7754090   | 7778928   | 6361          | ENSG00000272620 | AFAP1-AS1  |
| NR4A2_Medium | chr4    | 7845167   | 7845567   | Promoter (1-2kb)  | 4       | 7842688   | 7843837   | -1330         | ENSG00000196526 | AFAP1      |
| NR4A2_Medium | chr4    | 7866617   | 7867017   | Promoter (4-5kb)  | 4       | 7838588   | 7862311   | -4306         | ENSG00000196526 | AFAP1      |
| NR4A2_Medium | chr4    | 8012381   | 8012781   | Promoter (1-2kb)  | 4       | 8007385   | 8010728   | -1653         | ENSG00000163995 | ABLIM2     |
| NR4A2_Medium | chr4    | 8233703   | 8234168   | Promoter (2-3kb)  | 4       | 8231142   | 8241091   | 2561          | ENSG00000125089 | SH3TC1     |
| NR4A2_Medium | chr4    | 8263531   | 8263931   | Promoter (5-6kb)  | 4       | 8269754   | 8307098   | -5823         | ENSG00000170801 | HTRA3      |
| NR4A2_Medium | chr4    | 8370312   | 8370712   | Promoter (3-4kb)  | 4       | 8366712   | 8373815   | 3103          | ENSG00000087008 | ACOX3      |
| NR4A2_Medium | chr4    | 8422711   | 8423111   | Promoter (5-6kb)  | 4       | 8410282   | 8428461   | 5350          | ENSG00000087008 | ACOX3      |
| NR4A2_Medium | chr4    | 8427463   | 8427863   | Promoter (<=1kb)  | 4       | 8410282   | 8428461   | 598           | ENSG00000087008 | ACOX3      |
| NR4A2_Medium | chr4    | 8470286   | 8470686   | Promoter (<=1kb)  | 4       | 8470926   | 8493531   | -240          | ENSG00000155275 | TRMT44     |
| NR4A2_Medium | chr4    | 8477908   | 8478308   | Promoter (4-5kb)  | 4       | 8473516   | 8493531   | 4392          | ENSG00000155275 | TRMT44     |
| NR4A2_Medium | chr4    | 10018341  | 10018741  | Promoter (<=1kb)  | 4       | 9995669   | 10019075  | 334           | ENSG00000109667 | SLC2A9     |
| NR4A2_Medium | chr4    | 10058621  | 10059021  | Promoter (3-4kb)  | 4       | 9980592   | 10054936  | -3685         | ENSG00000109667 | SLC2A9     |
| NR4A2_Medium | chr4    | 14120304  | 14120704  | Promoter (8-9kb)  | 4       | 14112020  | 14139486  | 8284          | ENSG00000248698 | LINC01085  |
| NR4A2_Medium | chr4    | 14718430  | 14718830  | Promoter (1-2kb)  | 4       | 14628756  | 14716595  | -1835         | ENSG00000248360 | LINC00504  |
| NR4A2_Medium | chr4    | 14722940  | 14723340  | Promoter (6-7kb)  | 4       | 14628756  | 14716595  | -6345         | ENSG00000248360 | LINC00504  |
| NR4A2_Medium | chr4    | 16093028  | 16093428  | Promoter (8-9kb)  | 4       | 15968228  | 16084378  | -8650         | ENSG00000007062 | PROM1      |
| NR4A2_Medium | chr4    | 17499574  | 17499974  | Promoter (7-8kb)  | 4       | 17486800  | 17492513  | -7061         | ENSG00000151552 | QDPR       |
| NR4A2_Medium | chr4    | 17962391  | 17962791  | Promoter (<=1kb)  | 4       | 17845640  | 17962032  | -359          | ENSG00000178177 | LCORL      |
| NR4A2_Medium | chr4    | 20547248  | 20547648  | Promoter (4-5kb)  | 4       | 20542619  | 20568918  | 4629          | ENSG00000145147 | SLIT2      |
| NR4A2_Medium | chr4    | 22461352  | 22461752  | Promoter (5-6kb)  | 4       | 22387708  | 22455834  | -5518         | ENSG00000152990 | ADGRA3     |
| NR4A2_Medium | chr4    | 23822727  | 23823127  | Promoter (6-7kb)  | 4       | 23828490  | 23829671  | 6544          | ENSG00000109819 | PPARGC1A   |
| NR4A2_Medium | chr4    | 24540376  | 24540776  | Promoter (1-2kb)  | 4       | 24539709  | 24541899  | 1123          | ENSG00000109606 | DHX15      |
| NR4A2_Medium | chr4    | 26864576  | 26864976  | Promoter (3-4kb)  | 4       | 26861459  | 26995402  | 3117          | ENSG00000109689 | STM2       |
| NR4A2_Medium | chr4    | 34262621  | 34263021  | Promoter (6-7kb)  | 4       | 34120090  | 34269738  | 6717          | NA              | LINC02484  |
| NR4A2_Medium | chr4    | 36078815  | 36079215  | Promoter (4-5kb)  | 4       | 35948221  | 36073835  | -4980         | ENSG00000047365 | ARAP2      |
| NR4A2_Medium | chr4    | 36237080  | 36237480  | Promoter (6-7kb)  | 4       | 36160112  | 36243862  | 6382          | ENSG00000047365 | ARAP2      |
| NR4A2_Medium | chr4    | 38373643  | 38374043  | Promoter (6-7kb)  | 4       | 38366914  | 38385759  | 6729          | ENSG00000248227 | LINC02513  |
| NR4A2_Medium | chr4    | 38877710  | 38878110  | Promoter (9-10kb) | 4       | 38868032  | 38868127  | 9678          | ENSG00000207944 | MIR574     |
| NR4A2_Medium | chr4    | 39201004  | 39201404  | Promoter (1-2kb)  | 4       | 39199478  | 39206115  | 1526          | ENSG00000157796 | WDR19      |
| NR4A2_Medium | chr4    | 40095983  | 40096383  | Promoter (6-7kb)  | 4       | 40102907  | 40155397  | -6524         | ENSG00000078177 | N4BP2      |
| NR4A2_Medium | chr4    | 40928370  | 40928770  | Promoter (5-6kb)  | 4       | 40826786  | 40934487  | 5717          | ENSG00000163697 | APBB2      |
| NR4A2_Medium | chr4    | 41268283  | 41268683  | Promoter (6-7kb)  | 4       | 41261739  | 41264465  | 6544          | ENSG00000154277 | UCHL1      |
| NR4A2_Medium | chr4    | 42146794  | 42147194  | Promoter (4-5kb)  | 4       | 42117440  | 42152183  | 4989          | ENSG00000188848 | BEND4      |
| NR4A2_Medium | chr4    | 42150802  | 42151202  | Promoter (<=1kb)  | 4       | 42117440  | 42152183  | 981           | ENSG00000188848 | BEND4      |
| NR4A2_Medium | chr4    | 42467218  | 42467618  | Promoter (2-3kb)  | 4       | 42459358  | 42465075  | -2143         | ENSG00000124406 | ATP8A1     |
| NR4A2_Medium | chr4    | 42507624  | 42508024  | Promoter (<=1kb)  | 4       | 42408373  | 42507154  | -470          | ENSG00000124406 | ATP8A1     |
| NR4A2_Medium | chr4    | 44698755  | 44699155  | Promoter (4-5kb)  | 4       | 44694409  | 44700679  | 4346          | ENSG00000151806 | GUF1       |
| NR4A2_Medium | chr4    | 46465362  | 46465762  | Promoter (9-10kb) | 4       | 46248427  | 46475230  | 9468          | ENSG00000151834 | GABRA2     |
| NR4A2_Medium | chr4    | 48277936  | 48278336  | Promoter (8-9kb)  | 4       | 48135783  | 48269838  | -8098         | ENSG00000135605 | TEC        |
| NR4A2_Medium | chr4    | 48351402  | 483       |                   |         |           |           |               |                 |            |



| Condition    | peakChr | peakStart | peakEnd   | annotation        | geneChr | geneStart | geneEnd   | distanceToTSS | geneID          | geneSymbol   |
|--------------|---------|-----------|-----------|-------------------|---------|-----------|-----------|---------------|-----------------|--------------|
| NR4A2_Medium | chr4    | 56470900  | 56471300  | Promoter (3-4kb)  | 4       | 56467736  | 56489401  | 3164          | ENSG00000174780 | SRP72        |
| NR4A2_Medium | chr4    | 56687948  | 56688348  | Promoter (6-7kb)  | 4       | 56647988  | 56681899  | -6049         | ENSG00000171476 | HOPX         |
| NR4A2_Medium | chr4    | 56915938  | 56916338  | Promoter (4-5kb)  | 4       | 56911212  | 56929959  | 4726          | ENSG00000084093 | REST         |
| NR4A2_Medium | chr4    | 67419147  | 67419547  | Promoter (1-2kb)  | 4       | 67418542  | 67421054  | 1507          | ENSG00000250075 | LOC101927237 |
| NR4A2_Medium | chr4    | 67522924  | 67523324  | Promoter (7-8kb)  | 4       | 67472477  | 67530866  | 7542          | ENSG00000145241 | CENPC        |
| NR4A2_Medium | chr4    | 68025606  | 68026006  | Promoter (9-10kb) | 4       | 67991684  | 68015768  | -9838         | ENSG00000229009 | TMPRSS11GP   |
| NR4A2_Medium | chr4    | 69026683  | 69027083  | Promoter (6-7kb)  | 4       | 69004862  | 69020414  | -6269         | ENSG00000109181 | UGT2B10      |
| NR4A2_Medium | chr4    | 70645643  | 70646043  | Promoter (7-8kb)  | 4       | 70637745  | 70686816  | 7898          | ENSG00000132464 | ENAM         |
| NR4A2_Medium | chr4    | 70793583  | 70793983  | Promoter (<=1kb)  | 4       | 70793876  | 70806816  | 0             | ENSG00000018189 | RUFY3        |
| NR4A2_Medium | chr4    | 70840866  | 70841266  | Promoter (<=1kb)  | 4       | 70819531  | 70839897  | -969          | ENSG00000132463 | GRSF1        |
| NR4A2_Medium | chr4    | 71333666  | 71334066  | Promoter (4-5kb)  | 4       | 71339053  | 71473319  | -4987         | ENSG00000080493 | SLC4A4       |
| NR4A2_Medium | chr4    | 71784469  | 71784869  | Promoter (<=1kb)  | 4       | 71741697  | 71784079  | -390          | ENSG00000145321 | GC           |
| NR4A2_Medium | chr4    | 72025134  | 72025534  | Promoter (6-7kb)  | 4       | 72031804  | 72148067  | -6270         | ENSG00000056291 | NPFFR2       |
| NR4A2_Medium | chr4    | 74771090  | 74771490  | Promoter (<=1kb)  | 4       | 74746379  | 74770156  | -934          | ENSG00000174808 | BTC          |
| NR4A2_Medium | chr4    | 75877127  | 75877527  | Promoter (3-4kb)  | 4       | 75860111  | 75873195  | -3932         | ENSG00000156194 | PPEF2        |
| NR4A2_Medium | chr4    | 75968689  | 75969089  | Promoter (4-5kb)  | 4       | 75960122  | 75973391  | 4302          | ENSG00000198301 | SDAD1        |
| NR4A2_Medium | chr4    | 76285709  | 76286109  | Promoter (7-8kb)  | 4       | 76278119  | 76283774  | 7590          | ENSG00000189157 | FAM47E       |
| NR4A2_Medium | chr4    | 76416337  | 76416737  | Promoter (5-6kb)  | 4       | 76384379  | 76421843  | 5106          | ENSG00000163749 | CCDC158      |
| NR4A2_Medium | chr4    | 76551789  | 76552189  | Promoter (3-4kb)  | 4       | 76555614  | 76754586  | -3425         | ENSG00000138771 | SHROOM3      |
| NR4A2_Medium | chr4    | 76572947  | 76573347  | Promoter (<=1kb)  | 4       | 76573568  | 76573632  | -221          | ENSG00000263445 | MIR4450      |
| NR4A2_Medium | chr4    | 76942749  | 76943149  | Promoter (6-7kb)  | 4       | 76949703  | 77038614  | -6554         | ENSG00000138758 | SEPTIN11     |
| NR4A2_Medium | chr4    | 78410753  | 78411153  | Promoter (7-8kb)  | 4       | 78419038  | 78446633  | -7885         | ENSG00000138759 | FRAS1        |
| NR4A2_Medium | chr4    | 78451069  | 78451469  | Promoter (3-4kb)  | 4       | 78448058  | 78450455  | 3011          | ENSG00000138759 | FRAS1        |
| NR4A2_Medium | chr4    | 79205493  | 79205893  | Promoter (7-8kb)  | 4       | 79197541  | 79308655  | 7952          | ENSG00000249307 | LINC01088    |
| NR4A2_Medium | chr4    | 79268401  | 79268801  | Promoter (9-10kb) | 4       | 79258781  | 79308654  | 9620          | ENSG00000249307 | LINC01088    |
| NR4A2_Medium | chr4    | 82037493  | 82037893  | Promoter (6-7kb)  | 4       | 81427065  | 82044069  | 6176          | ENSG00000138670 | RASGEF1B     |
| NR4A2_Medium | chr4    | 82423600  | 82424000  | Promoter (5-6kb)  | 4       | 82424625  | 82429397  | 5397          | ENSG00000152795 | HNRNPDL      |
| NR4A2_Medium | chr4    | 82619849  | 82620249  | Promoter (1-2kb)  | 4       | 82613113  | 82621437  | 1188          | ENSG00000231782 | LINC00575    |
| NR4A2_Medium | chr4    | 83000471  | 83000871  | Promoter (9-10kb) | 4       | 82927586  | 83010709  | 9838          | ENSG00000189308 | LIN54        |
| NR4A2_Medium | chr4    | 83431690  | 83432090  | Promoter (3-4kb)  | 4       | 83407367  | 83427726  | -3964         | ENSG00000163312 | HELQ         |
| NR4A2_Medium | chr4    | 83520638  | 83521038  | Promoter (2-3kb)  | 4       | 83467454  | 83523348  | 2310          | ENSG00000163322 | ABRAXAS1     |
| NR4A2_Medium | chr4    | 85566140  | 85566540  | Promoter (4-5kb)  | 4       | 85570593  | 85722386  | -4053         | ENSG00000138639 | ARHGAP24     |
| NR4A2_Medium | chr4    | 86085635  | 86086035  | Promoter (3-4kb)  | 4       | 86067844  | 86082344  | -3291         | ENSG00000109339 | MAPK10       |
| NR4A2_Medium | chr4    | 86175627  | 86176027  | Promoter (4-5kb)  | 4       | 86016644  | 86171072  | -4555         | ENSG00000109339 | MAPK10       |
| NR4A2_Medium | chr4    | 87434242  | 87434642  | Promoter (7-8kb)  | 4       | 87441871  | 87454456  | -7229         | ENSG00000170502 | NUDT9        |
| NR4A2_Medium | chr4    | 87607239  | 87607639  | Promoter (<=1kb)  | 4       | 87608529  | 87616873  | -890          | ENSG00000152591 | DSPP         |
| NR4A2_Medium | chr4    | 87639986  | 87640386  | Promoter (9-10kb) | 4       | 87650280  | 87664357  | -9894         | ENSG00000152592 | DMP1         |
| NR4A2_Medium | chr4    | 94749437  | 94749837  | Promoter (7-8kb)  | 4       | 94743668  | 94757681  | 7844          | ENSG00000249599 | BMPR1B-DT    |
| NR4A2_Medium | chr4    | 99075742  | 99076142  | Promoter (3-4kb)  | 4       | 99076797  | 99080023  | 3881          | ENSG00000197894 | ADH5         |
| NR4A2_Medium | chr4    | 99884142  | 99884542  | Promoter (9-10kb) | 4       | 99881207  | 99894376  | 9834          | ENSG00000109270 | LAMTOR3      |
| NR4A2_Medium | chr4    | 99914805  | 99915205  | Promoter (8-9kb)  | 4       | 99900635  | 99906597  | -8208         | ENSG00000164031 | DNAJB14      |
| NR4A2_Medium | chr4    | 103013103 | 103013503 | Promoter (6-7kb)  | 4       | 102885049 | 103019650 | 6147          | ENSG00000164037 | SLC9B1       |
| NR4A2_Medium | chr4    | 103060539 | 103060939 | Promoter (2-3kb)  | 4       | 103020230 | 103057942 | -2597         | ENSG00000164038 | SLC9B2       |
| NR4A2_Medium | chr4    | 105483100 | 105483500 | Promoter (9-10kb) | 4       | 105369565 | 105474067 | -9033         | ENSG00000138777 | PPA2         |
| NR4A2_Medium | chr4    | 106226958 | 106227358 | Promoter (3-4kb)  | 4       | 106182353 | 106230446 | 3088          | ENSG00000145348 | TBCK         |
| NR4A2_Medium | chr4    | 108085440 | 108085840 | Promoter (2-3kb)  | 4       | 108048169 | 108083413 | -2027         | ENSG00000138795 | LEF1         |
| NR4A2_Medium | chr4    | 110206024 | 110206424 | Promoter (6-7kb)  | 4       | 110059650 | 110199199 | -6825         | ENSG00000170522 | ELOVL6       |
| NR4A2_Medium | chr4    | 110551011 | 110551411 | Promoter (1-2kb)  | 4       | 110549428 | 110553517 | 1583          | ENSG00000138792 | ENPEP        |
| NR4A2_Medium | chr4    | 110615017 | 110615417 | Promoter (<=1kb)  | 4       | 110603361 | 110615415 | 0             | ENSG00000250103 | PANCR        |
| NR4A2_Medium | chr4    | 112507107 | 112507507 | Promoter (7-8kb)  | 4       | 112515385 | 112518236 | -7878         | NA              | NEUROG2-AS1  |
| NR4A2_Medium | chr4    | 113310374 | 113310774 | Promoter (6-7kb)  | 4       | 113317452 | 113330363 | -6678         | ENSG00000145362 | ANK2         |
| NR4A2_Medium | chr4    | 115114438 | 115114838 | Promoter (<=1kb)  | 4       | 114827773 | 115113876 | -562          | ENSG00000138653 | NDST4        |
| NR4A2_Medium | chr4    | 118311635 | 118312035 | Promoter (1-2kb)  | 4       | 118303278 | 118313276 | 1241          | ENSG00000164099 | PRSS12       |
| NR4A2_Medium | chr4    | 119459959 | 119460359 | Promoter (<=1kb)  | 4       | 119460437 | 119461910 | -78           | ENSG00000245958 | SEPTIN7P14   |
| NR4A2_Medium | chr4    | 119634638 | 119635038 | Promoter (5-6kb)  | 4       | 119494403 | 119628804 | -5834         | ENSG00000138735 | PDE5A        |
| NR4A2_Medium | chr4    | 121216109 | 121216509 | Promoter (<=1kb)  | 4       | 121132040 | 121216627 | 118           | ENSG00000050730 | TNIP3        |
| NR4A2_Medium | chr4    | 121380508 | 121380908 | Promoter (<=1kb)  | 4       | 121329312 | 121380647 | 0             | ENSG00000186867 | QRFP         |
| NR4A2_Medium | chr4    | 121692896 | 121693296 | Promoter (3-4kb)  | 4       | 121668076 | 121696962 | 3666          | ENSG00000164111 | ANXA5        |
| NR4A2_Medium | chr4    | 122825068 | 122825468 | Promoter (1-2kb)  | 4       | 122826708 | 122898236 | -1240         | ENSG00000138685 | FGF2         |
| NR4A2_Medium | chr4    | 123915619 | 123916019 | Promoter (5-6kb)  | 4       | 123910181 | 123930723 | 5438          | ENSG00000249464 | LINC01091    |
| NR4A2_Medium | chr4    | 127671650 | 127672050 | Promoter (2-3kb)  | 4       | 127674154 | 127685950 | -2104         | ENSG00000164066 | INTU         |
| NR4A2_Medium | chr4    | 127725101 | 127725501 | Promoter (4-5kb)  | 4       | 127730400 | 127774292 | -4899         | ENSG00000151475 | SLC25A31     |
| NR4A2_Medium | chr4    | 128447018 | 128447418 | Promoter (7-8kb)  | 4       | 128455169 | 128470647 | -7751         | ENSG00000251432 | LINC02615    |
| NR4A2_Medium | chr4    | 130378596 | 130378996 | Promoter (2-3kb)  | 4       | 130376229 | 130432227 | 2367          | NA              | LINC02479    |
| NR4A2_Medium | chr4    | 139054974 | 139055374 | Promoter (5-6kb)  | 4       | 139028112 | 139060595 | 5221          | ENSG00000109381 | ELF2         |
| NR4A2_Medium | chr4    | 141358488 | 141358888 | Promoter (1-2kb)  | 4       | 141321239 | 141357096 | -1392         | ENSG00000248810 | LINC02432    |
| NR4A2_Medium | chr4    | 142466836 | 142467236 | Promoter (4-5kb)  | 4       | 142028033 | 142462753 | -4083         | ENSG00000109452 | INPP4B       |
| NR4A2_Medium | chr4    | 142482930 | 142483330 | Promoter (8-9kb)  | 4       | 142426481 | 142474408 | -8522         | ENSG00000109452 | INPP4B       |
| NR4A2_Medium | chr4    | 142513633 | 142514033 | Promoter (<=1kb)  | 4       | 142405305 | 142514281 | 248           | ENSG00000109452 | INPP4B       |
| NR4A2_Medium | chr4    | 145184078 | 145184478 | Promoter (3-4kb)  | 4       | 145133650 | 145180589 | -3489         | ENSG00000164164 | OTUD4        |
| NR4A2_Medium | chr4    | 145607248 | 145607648 | Promoter (8-9kb)  | 4       | 145599083 | 145655456 | 8165          | ENSG00000151611 | MMAA         |
| NR4A2_Medium | chr4    | 145871617 | 145872017 | Promoter (<=1kb)  | 4       | 145760721 | 145872212 | 195           | ENSG00000151612 | ZNF827       |
| NR4A2_Medium | chr4    | 150087310 | 150087710 | Promoter (8-9kb)  | 4       | 150079028 | 150257438 | 8282          | ENSG00000170390 | DCLK2        |
| NR4A2_Medium | chr4    | 151237973 | 151238373 | Promoter (9-10kb) | 4       | 151120287 | 151228030 | -9943         | ENSG00000109686 | SH3D19       |
| NR4A2_Medium | chr4    | 151415063 | 151415463 | Promoter (5-6kb)  | 4       | 151409352 | 151566299 | 5711          | ENSG00000164142 | FAM160A1     |
| NR4A2_Medium | chr4    | 151720873 | 151721273 | Promoter (3-4kb)  | 4       | 151670849 | 151724480 | 3207          | ENSG00000059691 | GATB         |
| NR4A2_Medium | chr4    | 152097379 | 152097779 | Promoter (2-3kb)  | 4       | 152100720 | 152104705 | -2941         | ENSG00000245954 | LINC02273    |
| NR4A2_Medium | chr4    | 152533983 | 152534383 | Promoter (<=1kb)  | 4       | 152411160 | 152535191 | 808           | ENSG00000109670 | FBXW7        |
| NR4A2_Medium | chr4    | 152788874 | 152789274 | Promoter (8-9kb)  | 4       | 152780109 | 152810386 | 8765          | ENSG00000164144 | ARFIP1       |
| NR4A2_Medium | chr4    | 152881683 | 152882083 | Promoter (1-2kb)  | 4       | 152883245 | 152910378 | -1162         | ENSG00000164144 | ARFIP1       |
| NR4A2_Medium | chr4    | 153202414 | 153202814 | Promoter (1-2kb)  | 4       | 153204443 | 153339317 | -1629         | ENSG00000109654 | TRIM2        |
| NR4A2_Medium | chr4    | 153309216 | 153309616 | Promoter (<=1kb)  | 4       | 153307792 | 153308717 | -499          | NA              | ANXA2P1      |
| NR4A2_Medium | chr4    | 153636581 | 153636981 | Promoter (3-4kb)  | 4       | 153640168 | 153681180 | -3187         | ENSG00000250771 | LOC100419170 |
| NR4A2_Medium | chr4    | 153647722 | 153648122 | Promoter (7-8kb)  | 4       | 153640168 | 153681180 | 7554          | ENSG00000250771 | LOC100419170 |
| NR4A2_Medium | chr4    | 154621792 | 154622192 | Promoter (4-5kb)  | 4       | 154626961 | 154744533 | -4769         | ENSG00000121207 | LRAT         |
| NR4A2_Medium | chr4    | 158229588 | 158229988 | Promoter (3-4kb)  | 4       | 158233036 | 158255287 | -3048         | ENSG00000164124 | TMEM144      |
| NR4A2_Medium | chr4    | 161491563 | 161491963 | Promoter (8-9kb)  | 4       | 161495136 | 161500074 | 8111          | ENSG00000168843 | FSTL5        |
| NR4A2_Medium | chr4    | 163146413 | 163146813 | Promoter (6-7kb)  | 4       | 163110073 | 163140337 | -6076         | ENSG00000145414 | NAF1         |
| NR4A2_Medium | chr4    | 168713555 | 168713955 | Promoter (1-2kb)  | 4       | 168712159 | 168898686 | 1396          | ENSG00000129116 | PALLD        |
| NR4A2_Medium | chr4    | 173332853 | 173333253 | Promoter (<=1kb)  | 4       | 173331701 | 173333672 | 419           | ENSG00000164104 | HMGB2        |
| NR4A2_Medium | chr4    | 173553157 | 173553557 | Promoter (5-6kb)  | 4       | 173548038 | 173562444 | 5119          | ENSG00000237125 | HAND2-AS1    |
| NR4A2_Medium | chr4    | 173559301 | 173559701 | Promoter (<=1kb)  | 4       | 173559154 | 173583128 | 147           | ENSG00000237125 | HAND2-AS1    |
| NR4A2_Medium | chr4    | 176069232 | 176069632 | Promoter (3-4kb)  | 4       | 176065981 | 176180159 | 3251          | ENSG00000150627 | WDR17        |
| NR4A2_Medium | chr4    | 176275415 | 176275815 | Promoter (6-7kb)  | 4       | 176213673 |           |               |                 |              |

| Condition    | peakChr | peakStart | peakEnd  | annotation        | geneChr | geneStart | geneEnd  | distanceToTSS | geneID          | geneSymbol    |
|--------------|---------|-----------|----------|-------------------|---------|-----------|----------|---------------|-----------------|---------------|
| NR4A2_Medium | chr5    | 88347     | 88747    | Promoter (3-4kb)  | 5       | 92151     | 189970   | -3404         | ENSG00000153404 | PLEKHG4B      |
| NR4A2_Medium | chr5    | 296968    | 297368   | Promoter (6-7kb)  | 5       | 304176    | 434857   | -6808         | ENSG00000286169 | AHRR          |
| NR4A2_Medium | chr5    | 882561    | 882961   | Promoter (<=1kb)  | 5       | 876160    | 883369   | 408           | ENSG00000028310 | BRD9          |
| NR4A2_Medium | chr5    | 1180360   | 1180760  | Promoter (1-2kb)  | 5       | 1173141   | 1178605  | -1755         | ENSG00000249201 | CTD-3080P12.3 |
| NR4A2_Medium | chr5    | 1196485   | 1196885  | Promoter (4-5kb)  | 5       | 1201595   | 1223270  | -4710         | ENSG00000174358 | SLC6A19       |
| NR4A2_Medium | chr5    | 1198775   | 1199175  | Promoter (2-3kb)  | 5       | 1201595   | 1223270  | -2420         | ENSG00000174358 | SLC6A19       |
| NR4A2_Medium | chr5    | 1229598   | 1229998  | Promoter (4-5kb)  | 5       | 1225409   | 1232839  | 4189          | ENSG00000164363 | SLC6A18       |
| NR4A2_Medium | chr5    | 1255023   | 1255423  | Promoter (9-10kb) | 5       | 1254617   | 1264534  | 9111          | ENSG00000164362 | TERT          |
| NR4A2_Medium | chr5    | 1312721   | 1313121  | Promoter (3-4kb)  | 5       | 1309310   | 1309377  | -3344         | ENSG00000263670 | MIR4457       |
| NR4A2_Medium | chr5    | 1703590   | 1703990  | Promoter (4-5kb)  | 5       | 1708785   | 1708868  | 4878          | ENSG00000263746 | MIR4277       |
| NR4A2_Medium | chr5    | 1881280   | 1881680  | Promoter (<=1kb)  | 5       | 1878785   | 1881093  | -187          | ENSG00000113430 | IRX4          |
| NR4A2_Medium | chr5    | 1894082   | 1894482  | Promoter (6-7kb)  | 5       | 1887332   | 1900493  | 6750          | ENSG00000249326 | CTD-2194D22.4 |
| NR4A2_Medium | chr5    | 3503899   | 3504299  | Promoter (<=1kb)  | 5       | 3496229   | 3504004  | 0             | ENSG00000250716 | LINC01017     |
| NR4A2_Medium | chr5    | 3507497   | 3507897  | Promoter (3-4kb)  | 5       | 3496229   | 3504004  | -3493         | ENSG00000250716 | LINC01017     |
| NR4A2_Medium | chr5    | 3595528   | 3595928  | Promoter (<=1kb)  | 5       | 3595832   | 3601403  | 0             | ENSG00000170549 | IRX1          |
| NR4A2_Medium | chr5    | 6591768   | 6592168  | Promoter (5-6kb)  | 5       | 6585772   | 6587925  | 5996          | ENSG00000250056 | LINC01018     |
| NR4A2_Medium | chr5    | 6760028   | 6760428  | Promoter (9-10kb) | 5       | 6750380   | 6751489  | 9648          | ENSG00000112941 | TENT4A        |
| NR4A2_Medium | chr5    | 6823026   | 6823426  | Promoter (4-5kb)  | 5       | 6827853   | 6827921  | 4495          | ENSG00000283420 | MIR4278       |
| NR4A2_Medium | chr5    | 6830790   | 6831190  | Promoter (2-3kb)  | 5       | 6827853   | 6827921  | -2869         | ENSG00000283420 | MIR4278       |
| NR4A2_Medium | chr5    | 7610158   | 7610558  | Promoter (<=1kb)  | 5       | 7611109   | 7695816  | -551          | ENSG00000078295 | ADCY2         |
| NR4A2_Medium | chr5    | 9892886   | 9893286  | Promoter (8-9kb)  | 5       | 9862882   | 9884028  | -8858         | ENSG00000249781 | LINC02112     |
| NR4A2_Medium | chr5    | 10307796  | 10308196 | Promoter (<=1kb)  | 5       | 10277595  | 10307902 | 0             | ENSG00000164237 | CMBL          |
| NR4A2_Medium | chr5    | 10419399  | 10419799 | Promoter (3-4kb)  | 5       | 10415599  | 10417451 | 3800          | ENSG00000145495 | MARCHF6       |
| NR4A2_Medium | chr5    | 13934196  | 13934596 | Promoter (1-2kb)  | 5       | 13911357  | 13932456 | -1740         | ENSG00000039139 | DNAH5         |
| NR4A2_Medium | chr5    | 14135862  | 14136262 | Promoter (7-8kb)  | 5       | 14143342  | 14510204 | -7080         | ENSG00000038382 | TRIO          |
| NR4A2_Medium | chr5    | 14504968  | 14505368 | Promoter (6-7kb)  | 5       | 14498516  | 14508333 | 6452          | ENSG00000038382 | TRIO          |
| NR4A2_Medium | chr5    | 14823332  | 14823732 | Promoter (2-3kb)  | 5       | 14825929  | 14826012 | 2280          | ENSG00000264792 | MIR4637       |
| NR4A2_Medium | chr5    | 15258305  | 15258705 | Promoter (7-8kb)  | 5       | 15192139  | 15266541 | 7836          | NA              | LINC02149     |
| NR4A2_Medium | chr5    | 16731008  | 16731408 | Promoter (7-8kb)  | 5       | 16666380  | 16738414 | 7006          | ENSG00000145555 | MYO10         |
| NR4A2_Medium | chr5    | 17649184  | 17649584 | Promoter (6-7kb)  | 5       | 17654870  | 17655847 | 6263          | ENSG00000269466 | H3Y1          |
| NR4A2_Medium | chr5    | 19890246  | 19890646 | Promoter (3-4kb)  | 5       | 19473573  | 19886272 | -3974         | ENSG00000145526 | CDH18         |
| NR4A2_Medium | chr5    | 19982691  | 19983091 | Promoter (5-6kb)  | 5       | 19473579  | 19988185 | 5094          | ENSG00000145526 | CDH18         |
| NR4A2_Medium | chr5    | 27122320  | 27122720 | Promoter (1-2kb)  | 5       | 26915755  | 27121150 | -1170         | ENSG00000113100 | CDH9          |
| NR4A2_Medium | chr5    | 31539832  | 31540232 | Promoter (1-2kb)  | 5       | 31538173  | 31545714 | 1659          | ENSG00000082213 | C5orf22       |
| NR4A2_Medium | chr5    | 33626356  | 33626756 | Promoter (2-3kb)  | 5       | 33603442  | 33624351 | -2005         | ENSG00000151388 | ADAMTS12      |
| NR4A2_Medium | chr5    | 33626918  | 33627318 | Promoter (2-3kb)  | 5       | 33603442  | 33624351 | -2567         | ENSG00000151388 | ADAMTS12      |
| NR4A2_Medium | chr5    | 34190290  | 34190690 | Promoter (<=1kb)  | 5       | 34190056  | 34193653 | 234           | NA              | LOC646652     |
| NR4A2_Medium | chr5    | 34192358  | 34192758 | Promoter (2-3kb)  | 5       | 34190056  | 34193653 | 2302          | NA              | LOC646652     |
| NR4A2_Medium | chr5    | 34707519  | 34707919 | Promoter (8-9kb)  | 5       | 34716086  | 34807857 | -8167         | ENSG00000039560 | RAI14         |
| NR4A2_Medium | chr5    | 34734343  | 34734743 | Promoter (5-6kb)  | 5       | 34728574  | 34811071 | 5769          | ENSG00000039560 | RAI14         |
| NR4A2_Medium | chr5    | 34935534  | 34935934 | Promoter (<=1kb)  | 5       | 34936204  | 34950342 | -270          | ENSG00000168724 | DNAJC21       |
| NR4A2_Medium | chr5    | 35017092  | 35017492 | Promoter (8-9kb)  | 5       | 35012397  | 35025833 | 8341          | ENSG00000113492 | AGXT2         |
| NR4A2_Medium | chr5    | 35707755  | 35708155 | Promoter (7-8kb)  | 5       | 35700623  | 35705791 | 7132          | ENSG00000152582 | SPEF2         |
| NR4A2_Medium | chr5    | 35708466  | 35708866 | Promoter (7-8kb)  | 5       | 35700623  | 35705791 | 7843          | ENSG00000152582 | SPEF2         |
| NR4A2_Medium | chr5    | 37348324  | 37348724 | Promoter (1-2kb)  | 5       | 37342397  | 37350202 | 1478          | ENSG00000113569 | NUP155        |
| NR4A2_Medium | chr5    | 37356414  | 37356814 | Promoter (6-7kb)  | 5       | 37342397  | 37350202 | -6212         | ENSG00000113569 | NUP155        |
| NR4A2_Medium | chr5    | 37811229  | 37811629 | Promoter (<=1kb)  | 5       | 37811589  | 37874894 | 0             | NA              | GDNF-AS1      |
| NR4A2_Medium | chr5    | 37834387  | 37834787 | Promoter (<=1kb)  | 5       | 37812677  | 37834822 | 35            | ENSG00000168621 | GDNF          |
| NR4A2_Medium | chr5    | 41155271  | 41155671 | Promoter (<=1kb)  | 5       | 41152747  | 41155104 | -167          | ENSG00000039537 | C6            |
| NR4A2_Medium | chr5    | 41218285  | 41218685 | Promoter (4-5kb)  | 5       | 41203138  | 41213595 | -4690         | ENSG00000039537 | C6            |
| NR4A2_Medium | chr5    | 42511696  | 42512096 | Promoter (2-3kb)  | 5       | 42514147  | 42619821 | -2051         | ENSG00000112964 | GHR           |
| NR4A2_Medium | chr5    | 42991475  | 42991875 | Promoter (1-2kb)  | 5       | 42983636  | 42992938 | 1063          | ENSG00000287263 | FLJ32255      |
| NR4A2_Medium | chr5    | 43183034  | 43183434 | Promoter (8-9kb)  | 5       | 43192071  | 43245330 | -8637         | ENSG00000177453 | NIM1K         |
| NR4A2_Medium | chr5    | 54380975  | 54381375 | Promoter (9-10kb) | 5       | 54390838  | 54401829 | -9463         | ENSG00000249069 | LINC01033     |
| NR4A2_Medium | chr5    | 55730053  | 55730453 | Promoter (7-8kb)  | 5       | 55738017  | 55816777 | -7564         | ENSG00000152670 | DDX4          |
| NR4A2_Medium | chr5    | 56889376  | 56889776 | Promoter (3-4kb)  | 5       | 56885953  | 56896152 | 3423          | ENSG00000095015 | MAP3K1        |
| NR4A2_Medium | chr5    | 57243113  | 57243513 | Promoter (1-2kb)  | 5       | 57245468  | 57251012 | -1955         | ENSG00000062194 | GPBP1         |
| NR4A2_Medium | chr5    | 57577099  | 57577499 | Promoter (1-2kb)  | 5       | 57576091  | 57617430 | 1008          | ENSG00000249436 | LINC00003     |
| NR4A2_Medium | chr5    | 58484057  | 58484457 | Promoter (6-7kb)  | 5       | 58491435  | 58494742 | -6978         | ENSG00000175857 | GAPT          |
| NR4A2_Medium | chr5    | 59006632  | 59007032 | Promoter (6-7kb)  | 5       | 58974018  | 58999932 | -6700         | ENSG00000113448 | PDE4D         |
| NR4A2_Medium | chr5    | 59706187  | 59706587 | Promoter (2-3kb)  | 5       | 59703606  | 59703703 | -2484         | ENSG00000202601 | MIR582        |
| NR4A2_Medium | chr5    | 60494023  | 60494423 | Promoter (5-6kb)  | 5       | 60488207  | 60526418 | 5816          | ENSG00000152931 | PART1         |
| NR4A2_Medium | chr5    | 60927927  | 60928327 | Promoter (9-10kb) | 5       | 60898324  | 60918613 | -9314         | ENSG00000049167 | ERCC8         |
| NR4A2_Medium | chr5    | 62398977  | 62399377 | Promoter (4-5kb)  | 5       | 62392812  | 62403891 | 4514          | ENSG00000086189 | DIMT1         |
| NR4A2_Medium | chr5    | 62509797  | 62510197 | Promoter (5-6kb)  | 5       | 62515451  | 62526745 | -5254         | ENSG00000086200 | IPO11         |
| NR4A2_Medium | chr5    | 64173059  | 64173459 | Promoter (6-7kb)  | 5       | 64166162  | 64213647 | 6897          | ENSG00000164197 | RNF180        |
| NR4A2_Medium | chr5    | 64505623  | 64506023 | Promoter (<=1kb)  | 5       | 64506015  | 64612319 | 0             | ENSG00000186479 | RGSTBP        |
| NR4A2_Medium | chr5    | 65268318  | 65268718 | Promoter (5-6kb)  | 5       | 65256390  | 65262937 | -5381         | ENSG00000049192 | ADAMTS6       |
| NR4A2_Medium | chr5    | 65529924  | 65530324 | Promoter (<=1kb)  | 5       | 65528980  | 65529786 | -138          | ENSG00000123219 | CENPK         |
| NR4A2_Medium | chr5    | 65713293  | 65713693 | Promoter (8-9kb)  | 5       | 65665928  | 65722109 | 8416          | ENSG00000197860 | SGTB          |
| NR4A2_Medium | chr5    | 66034644  | 66035044 | Promoter (9-10kb) | 5       | 66025306  | 66025977 | 9338          | ENSG00000112851 | ERBIN         |
| NR4A2_Medium | chr5    | 66062458  | 66062858 | Promoter (6-7kb)  | 5       | 66068877  | 66075230 | -6019         | ENSG00000112851 | ERBIN         |
| NR4A2_Medium | chr5    | 66139702  | 66140102 | Promoter (<=1kb)  | 5       | 66139971  | 66162273 | 0             | ENSG00000153914 | SREK1         |
| NR4A2_Medium | chr5    | 72112335  | 72112735 | Promoter (4-5kb)  | 5       | 72107486  | 72195314 | 4849          | ENSG00000131711 | MAP1B         |
| NR4A2_Medium | chr5    | 72664560  | 72664960 | Promoter (3-4kb)  | 5       | 72574120  | 72660669 | -3891         | ENSG00000248371 | LINC02056     |
| NR4A2_Medium | chr5    | 72846337  | 72846737 | Promoter (1-2kb)  | 5       | 72848170  | 72861915 | -1433         | ENSG00000083312 | TNPO1         |
| NR4A2_Medium | chr5    | 73030138  | 73030538 | Promoter (3-4kb)  | 5       | 73034468  | 73037192 | -3930         | ENSG00000157107 | FCHO2         |
| NR4A2_Medium | chr5    | 73165771  | 73166171 | Promoter (7-8kb)  | 5       | 73173193  | 73175143 | -7022         | ENSG00000164325 | TMEM174       |
| NR4A2_Medium | chr5    | 73440921  | 73441321 | Promoter (7-8kb)  | 5       | 73446266  | 73448777 | 7456          | ENSG00000251493 | FOXD1         |
| NR4A2_Medium | chr5    | 73683989  | 73684389 | Promoter (<=1kb)  | 5       | 73684832  | 73941589 | -443          | ENSG00000214944 | ARHGEF28      |
| NR4A2_Medium | chr5    | 74679614  | 74680014 | Promoter (5-6kb)  | 5       | 74685196  | 74706168 | -5182         | ENSG00000049860 | HEXB          |
| NR4A2_Medium | chr5    | 74744885  | 74745285 | Promoter (3-4kb)  | 5       | 74739989  | 74741848 | -3037         | ENSG00000164347 | GFM2          |
| NR4A2_Medium | chr5    | 75632360  | 75632760 | Promoter (1-2kb)  | 5       | 75634652  | 75669337 | -1892         | ENSG00000189045 | ANKDD1B       |
| NR4A2_Medium | chr5    | 76409193  | 76409593 | Promoter (4-5kb)  | 5       | 76404424  | 76665051 | 4769          | ENSG00000145703 | IQGAP2        |
| NR4A2_Medium | chr5    | 77108566  | 77108966 | Promoter (9-10kb) | 5       | 77118320  | 77148110 | -9354         | ENSG00000250802 | ZBED3-AS1     |
| NR4A2_Medium | chr5    | 77134599  | 77134999 | Promoter (4-5kb)  | 5       | 77139249  | 77148523 | -4250         | ENSG00000250802 | ZBED3-AS1     |
| NR4A2_Medium | chr5    | 77700671  | 77701071 | Promoter (6-7kb)  | 5       | 77691259  | 77694277 | -6394         | ENSG00000171530 | TBCA          |
| NR4A2_Medium | chr5    | 77965623  | 77966023 | Promoter (7-8kb)  | 5       | 77958243  | 77959092 | 7380          | ENSG00000287162 | LOC101929154  |
| NR4A2_Medium | chr5    | 78423445  | 78423845 | Promoter (6-7kb)  | 5       | 78416603  | 78478815 | 6842          | ENSG00000085365 | SCAMP1        |
| NR4A2_Medium | chr5    | 78460998  | 78461398 | Promoter (3-4kb)  | 5       | 78457793  | 78476829 | 3205          | ENSG00000085365 | SCAMP1        |
| NR4A2_Medium | chr5    | 78949504  | 78949904 | Promoter (5-6kb)  | 5       | 78884294  | 78955374 | 5470          | ENSG00000113273 | ARSB          |
| NR4A2_Medium | chr5    | 80027998  | 80028398 | Promoter (6-7kb)  | 5       | 80035348  | 80083287 | -6950         | ENSG00000113296 | THBS4         |
| NR4A2_Medium | chr5    | 80159422  | 80159822 | Promoter (7-8kb)  | 5       | 80156994  | 80167180 | 7358          | ENSG00000164300 | SERINC5       |
| NR4A2_Medium | chr5    | 80570672  | 80571072 | Promoter (<=1kb)  | 5       | 80556755  | 80570280 | -392          | ENSG00000189127 | ANKRD34B      |
| NR4A2_Medium | chr5    | 82281076  | 82281476 | Promoter (1-2kb)  | 5       | 82279462  | 82318803 | 1614          | ENSG00000205464 | ATP6AP1L      |
| NR4A2_Medium | chr5    | 88401458  | 88401858 | Promoter (7-8kb)  | 5       | 88408981  | 88436665 | -7123         | ENSG00000247828 | TMEM161B-AS1  |
| NR4A2_Medium |         |           |          |                   |         |           |          |               |                 |               |



| Condition    | peakChr | peakStart | peakEnd   | annotation        | geneChr | geneStart | geneEnd   | distanceToTSS | geneID          | geneSymbol   |
|--------------|---------|-----------|-----------|-------------------|---------|-----------|-----------|---------------|-----------------|--------------|
| NR4A2_Medium | chr5    | 98871044  | 98871444  | Promoter (<=1kb)  | 5       | 98863408  | 98870790  | -254          | ENSG00000153922 | CHD1         |
| NR4A2_Medium | chr5    | 98896655  | 98897055  | Promoter (8-9kb)  | 5       | 98881247  | 98888186  | -8469         | ENSG00000153922 | CHD1         |
| NR4A2_Medium | chr5    | 100810491 | 100810891 | Promoter (5-6kb)  | 5       | 100816482 | 100816565 | 5674          | ENSG00000221263 | MIR548P      |
| NR4A2_Medium | chr5    | 103550806 | 103551206 | Promoter (4-5kb)  | 5       | 103554502 | 103556089 | 4883          | ENSG00000112874 | NUDT12       |
| NR4A2_Medium | chr5    | 107379124 | 107379524 | Promoter (9-10kb) | 5       | 107380984 | 107388553 | 9029          | ENSG00000184349 | EFNA5        |
| NR4A2_Medium | chr5    | 107510163 | 107510563 | Promoter (3-4kb)  | 5       | 107427217 | 107506191 | -3972         | ENSG00000184349 | EFNA5        |
| NR4A2_Medium | chr5    | 108388600 | 108389000 | Promoter (6-7kb)  | 5       | 107859045 | 108382098 | -6502         | ENSG00000145743 | FBXL17       |
| NR4A2_Medium | chr5    | 111721293 | 111721693 | Promoter (8-9kb)  | 5       | 111730389 | 111732181 | -8696         | ENSG00000246859 | STARD4-AS1   |
| NR4A2_Medium | chr5    | 111757851 | 111758251 | Promoter (<=1kb)  | 5       | 111730658 | 111758070 | 0             | ENSG00000134986 | NREP         |
| NR4A2_Medium | chr5    | 113303415 | 113303815 | Promoter (8-9kb)  | 5       | 113022099 | 113294949 | -8466         | ENSG00000171444 | MCC          |
| NR4A2_Medium | chr5    | 114672104 | 114672504 | Promoter (3-4kb)  | 5       | 114475339 | 114668410 | -3694         | NA              | LOC101927078 |
| NR4A2_Medium | chr5    | 115283699 | 115284099 | Promoter (6-7kb)  | 5       | 115275335 | 115277185 | -6514         | ENSG00000164221 | CCDC112      |
| NR4A2_Medium | chr5    | 115992192 | 115992592 | Promoter (2-3kb)  | 5       | 115995377 | 116026420 | -2785         | ENSG00000172901 | LVRN         |
| NR4A2_Medium | chr5    | 116091666 | 116092066 | Promoter (<=1kb)  | 5       | 116091079 | 116292916 | 587           | ENSG00000145781 | COMMD10      |
| NR4A2_Medium | chr5    | 116492526 | 116492926 | Promoter (2-3kb)  | 5       | 116486749 | 116495445 | 2519          | ENSG00000092421 | SEMA6A       |
| NR4A2_Medium | chr5    | 116549847 | 116550247 | Promoter (4-5kb)  | 5       | 116496251 | 116554896 | 4649          | ENSG00000092421 | SEMA6A       |
| NR4A2_Medium | chr5    | 118571103 | 118571503 | Promoter (8-9kb)  | 5       | 118545739 | 118562199 | -8904         | NA              | LINC02208    |
| NR4A2_Medium | chr5    | 119163710 | 119164110 | Promoter (3-4kb)  | 5       | 119167629 | 119170535 | -3519         | ENSG00000172869 | DMXL1        |
| NR4A2_Medium | chr5    | 122163886 | 122164286 | Promoter (3-4kb)  | 5       | 122160191 | 122180061 | 3695          | ENSG00000250803 | LOC100505841 |
| NR4A2_Medium | chr5    | 122724977 | 122725377 | Promoter (2-3kb)  | 5       | 122699390 | 122722214 | -2763         | ENSG00000251538 | LINC02201    |
| NR4A2_Medium | chr5    | 126596099 | 126596499 | Promoter (<=1kb)  | 5       | 126544153 | 126595362 | -737          | ENSG00000164904 | ALDH7A1      |
| NR4A2_Medium | chr5    | 127034593 | 127034993 | Promoter (4-5kb)  | 5       | 126867714 | 127030558 | -4035         | ENSG00000173926 | MARCHF3      |
| NR4A2_Medium | chr5    | 131178622 | 131179022 | Promoter (6-7kb)  | 5       | 131159478 | 131171735 | -6887         | ENSG00000169567 | HINT1        |
| NR4A2_Medium | chr5    | 131881293 | 131881693 | Promoter (2-3kb)  | 5       | 131807123 | 131879020 | -2273         | ENSG00000239642 | MEIKIN       |
| NR4A2_Medium | chr5    | 131983492 | 131983892 | Promoter (4-5kb)  | 5       | 131981859 | 131988090 | 4198          | ENSG00000164398 | ACSL6        |
| NR4A2_Medium | chr5    | 132007532 | 132007932 | Promoter (3-4kb)  | 5       | 131951790 | 132011563 | 3631          | ENSG00000164398 | ACSL6        |
| NR4A2_Medium | chr5    | 132053215 | 132053615 | Promoter (7-8kb)  | 5       | 132060655 | 132063204 | -7040         | ENSG00000164399 | IL3          |
| NR4A2_Medium | chr5    | 132231916 | 132232316 | Promoter (3-4kb)  | 5       | 132217779 | 132228258 | -3658         | ENSG00000072682 | P4HA2        |
| NR4A2_Medium | chr5    | 132645898 | 132646298 | Promoter (4-5kb)  | 5       | 132630589 | 132641773 | -4125         | ENSG00000223442 | TH2LCRR      |
| NR4A2_Medium | chr5    | 132798911 | 132799311 | Promoter (7-8kb)  | 5       | 132763824 | 132807241 | 7930          | ENSG00000164402 | SEPTIN8      |
| NR4A2_Medium | chr5    | 132929967 | 132930367 | Promoter (2-3kb)  | 5       | 132898283 | 132927562 | -2405         | ENSG00000072364 | AFF4         |
| NR4A2_Medium | chr5    | 133059592 | 133059992 | Promoter (7-8kb)  | 5       | 133052241 | 133103908 | 7351          | ENSG00000170606 | HSPA4        |
| NR4A2_Medium | chr5    | 134145612 | 134146012 | Promoter (2-3kb)  | 5       | 134142792 | 134151865 | 2820          | ENSG00000081059 | TCF7         |
| NR4A2_Medium | chr5    | 134456053 | 134456453 | Promoter (4-5kb)  | 5       | 134429051 | 134460615 | 4162          | ENSG00000250564 | LOC102546229 |
| NR4A2_Medium | chr5    | 134871054 | 134871454 | Promoter (2-3kb)  | 5       | 134873803 | 134901525 | -2349         | ENSG00000113621 | TXNDC15      |
| NR4A2_Medium | chr5    | 135137018 | 135137418 | Promoter (8-9kb)  | 5       | 135128155 | 135337973 | 8863          | ENSG00000224186 | C5orf66      |
| NR4A2_Medium | chr5    | 135237797 | 135238197 | Promoter (9-10kb) | 5       | 135247046 | 135247815 | 9618          | ENSG00000249647 | C5orf66-AS2  |
| NR4A2_Medium | chr5    | 135400314 | 135400714 | Promoter (<=1kb)  | 5       | 135369368 | 135399914 | -400          | ENSG00000113648 | MACROH2A1    |
| NR4A2_Medium | chr5    | 135439066 | 135439466 | Promoter (7-8kb)  | 5       | 135444214 | 135447348 | 7882          | ENSG00000251380 | DCANP1       |
| NR4A2_Medium | chr5    | 136169280 | 136169680 | Promoter (4-5kb)  | 5       | 136174469 | 136188747 | -4789         | ENSG00000113658 | SMAD5        |
| NR4A2_Medium | chr5    | 136217072 | 136217472 | Promoter (8-9kb)  | 5       | 136213349 | 136226437 | 8965          | ENSG00000069018 | TRPC7        |
| NR4A2_Medium | chr5    | 136219358 | 136219758 | Promoter (6-7kb)  | 5       | 136213349 | 136226437 | 6679          | ENSG00000069018 | TRPC7        |
| NR4A2_Medium | chr5    | 137869662 | 137870062 | Promoter (1-2kb)  | 5       | 137867876 | 137887528 | 1786          | ENSG00000120729 | MYOT         |
| NR4A2_Medium | chr5    | 138157935 | 138158335 | Promoter (1-2kb)  | 5       | 138156882 | 138160129 | 1794          | ENSG00000112983 | BRD8         |
| NR4A2_Medium | chr5    | 138197058 | 138197458 | Promoter (1-2kb)  | 5       | 138189670 | 138198623 | 1165          | ENSG00000094880 | CDC23        |
| NR4A2_Medium | chr5    | 138556867 | 138557267 | Promoter (<=1kb)  | 5       | 138555827 | 138557891 | 624           | ENSG00000113013 | HSPA9        |
| NR4A2_Medium | chr5    | 138654719 | 138655119 | Promoter (8-9kb)  | 5       | 138663837 | 138783353 | -8718         | ENSG00000044115 | CTNNA1       |
| NR4A2_Medium | chr5    | 138894213 | 138894613 | Promoter (7-8kb)  | 5       | 138886229 | 138904792 | 7984          | ENSG00000044115 | CTNNA1       |
| NR4A2_Medium | chr5    | 139339698 | 139340098 | Promoter (1-2kb)  | 5       | 139341587 | 139364704 | -1489         | ENSG00000120727 | PAIP2        |
| NR4A2_Medium | chr5    | 139644736 | 139645136 | Promoter (2-3kb)  | 5       | 139647299 | 139680729 | -2163         | ENSG00000171604 | CXXC5        |
| NR4A2_Medium | chr5    | 139671050 | 139671450 | Promoter (3-4kb)  | 5       | 139675436 | 139681066 | -3986         | ENSG00000171604 | CXXC5        |
| NR4A2_Medium | chr5    | 139826582 | 139826982 | Promoter (4-5kb)  | 5       | 139821890 | 139836881 | 4692          | ENSG00000146005 | PSD2         |
| NR4A2_Medium | chr5    | 140272899 | 140273299 | Promoter (8-9kb)  | 5       | 140245347 | 140281535 | 8236          | ENSG00000113068 | PFDN1        |
| NR4A2_Medium | chr5    | 140580343 | 140580743 | Promoter (6-7kb)  | 5       | 140563890 | 140574197 | -6146         | ENSG00000113108 | APBB3        |
| NR4A2_Medium | chr5    | 140581764 | 140582164 | Promoter (7-8kb)  | 5       | 140563890 | 140574197 | -7567         | ENSG00000113108 | APBB3        |
| NR4A2_Medium | chr5    | 141495237 | 141495637 | Promoter (6-7kb)  | 5       | 141489167 | 141491929 | 6070          | ENSG00000240764 | PCDHGC5      |
| NR4A2_Medium | chr5    | 141644861 | 141645261 | Promoter (1-2kb)  | 5       | 141644630 | 141646364 | 1103          | ENSG00000197948 | FCHSD1       |
| NR4A2_Medium | chr5    | 141944441 | 141944841 | Promoter (7-8kb)  | 5       | 141937074 | 141938948 | 7367          | ENSG00000081791 | DELE1        |
| NR4A2_Medium | chr5    | 142382999 | 142383399 | Promoter (6-7kb)  | 5       | 142390322 | 142533702 | -6923         | ENSG00000231185 | SPRY4-AS1    |
| NR4A2_Medium | chr5    | 142646855 | 142647255 | Promoter (2-3kb)  | 5       | 142592179 | 142644301 | -2554         | ENSG00000113578 | FGF1         |
| NR4A2_Medium | chr5    | 142706043 | 142706443 | Promoter (7-8kb)  | 5       | 142592179 | 142698070 | -7973         | ENSG00000113578 | FGF1         |
| NR4A2_Medium | chr5    | 142718537 | 142718937 | Promoter (2-3kb)  | 5       | 142716245 | 142760998 | 2292          | ENSG00000236714 | LINC01844    |
| NR4A2_Medium | chr5    | 146877175 | 146877575 | Promoter (1-2kb)  | 5       | 146589947 | 146878581 | 1006          | ENSG00000156475 | PPP2R2B      |
| NR4A2_Medium | chr5    | 147378660 | 147379060 | Promoter (3-4kb)  | 5       | 147382898 | 147383949 | -3838         | ENSG00000169302 | STK32A       |
| NR4A2_Medium | chr5    | 147445308 | 147445708 | Promoter (7-8kb)  | 5       | 147408728 | 147453665 | 7957          | ENSG00000113657 | DPYSL3       |
| NR4A2_Medium | chr5    | 147862063 | 147862463 | Promoter (8-9kb)  | 5       | 147870682 | 147882190 | -8219         | ENSG00000164265 | SCGB3A2      |
| NR4A2_Medium | chr5    | 148419907 | 148420307 | Promoter (3-4kb)  | 5       | 148423749 | 148427270 | -3442         | ENSG00000145868 | FBXO38       |
| NR4A2_Medium | chr5    | 148815577 | 148815977 | Promoter (9-10kb) | 5       | 148825245 | 148828687 | -9268         | ENSG00000169252 | ADRB2        |
| NR4A2_Medium | chr5    | 149063701 | 149064101 | Promoter (<=1kb)  | 5       | 149063609 | 149107138 | 92            | ENSG00000250072 | SH3TC2-DT    |
| NR4A2_Medium | chr5    | 149275028 | 149275428 | Promoter (3-4kb)  | 5       | 149271919 | 149340121 | 3109          | ENSG00000157510 | AFAP1L1      |
| NR4A2_Medium | chr5    | 149416766 | 149417166 | Promoter (3-4kb)  | 5       | 149420528 | 149425670 | -3362         | NA              | CARMN        |
| NR4A2_Medium | chr5    | 149996433 | 149996833 | Promoter (3-4kb)  | 5       | 150000046 | 150053142 | -3213         | ENSG00000113716 | HMGXB3       |
| NR4A2_Medium | chr5    | 150275438 | 150275838 | Promoter (2-3kb)  | 5       | 150238717 | 150273126 | -2312         | ENSG00000070808 | CAMK2A       |
| NR4A2_Medium | chr5    | 150355781 | 150356181 | Promoter (1-2kb)  | 5       | 150357629 | 150398429 | -1448         | ENSG00000070814 | TCOF1        |
| NR4A2_Medium | chr5    | 150458644 | 150459044 | Promoter (8-9kb)  | 5       | 150442635 | 150449739 | -8905         | ENSG00000164587 | RPS14        |
| NR4A2_Medium | chr5    | 150487388 | 150487788 | Promoter (1-2kb)  | 5       | 150486331 | 150521227 | 1057          | ENSG00000070614 | NDST1        |
| NR4A2_Medium | chr5    | 150542459 | 150542859 | Promoter (9-10kb) | 5       | 150552561 | 150553711 | -9702         | ENSG00000070614 | NDST1        |
| NR4A2_Medium | chr5    | 150602955 | 150603355 | Promoter (1-2kb)  | 5       | 150601080 | 150654232 | 1875          | ENSG00000171992 | SYNPO        |
| NR4A2_Medium | chr5    | 150660597 | 150660997 | Promoter (<=1kb)  | 5       | 150660874 | 150677015 | 0             | ENSG00000164591 | MYOZ3        |
| NR4A2_Medium | chr5    | 151918019 | 151918419 | Promoter (6-7kb)  | 5       | 151849691 | 151924832 | 6413          | ENSG00000145888 | GLRA1        |
| NR4A2_Medium | chr5    | 152191501 | 152191901 | Promoter (2-3kb)  | 5       | 152194423 | 152270412 | -2522         | ENSG00000254226 | LINC01933    |
| NR4A2_Medium | chr5    | 152206865 | 152207265 | Promoter (9-10kb) | 5       | 152217074 | 152270432 | -9809         | ENSG00000254226 | LINC01933    |
| NR4A2_Medium | chr5    | 152408536 | 152408936 | Promoter (3-4kb)  | 5       | 152391532 | 152405279 | -3257         | ENSG00000132911 | NMUR2        |
| NR4A2_Medium | chr5    | 154050202 | 154050602 | Promoter (<=1kb)  | 5       | 154049602 | 154053002 | 600           | ENSG00000037749 | MFAP3        |
| NR4A2_Medium | chr5    | 154185830 | 154186230 | Promoter (4-5kb)  | 5       | 154190730 | 154389581 | -4500         | ENSG00000164574 | GALNT10      |
| NR4A2_Medium | chr5    | 154715499 | 154715899 | Promoter (2-3kb)  | 5       | 154712843 | 154817605 | 2656          | ENSG00000155506 | LARP1        |
| NR4A2_Medium | chr5    | 154760002 | 154760402 | Promoter (2-3kb)  | 5       | 154757174 | 154804208 | 2828          | ENSG00000155506 | LARP1        |
| NR4A2_Medium | chr5    | 155006697 | 155007097 | Promoter (6-7kb)  | 5       | 155013755 | 155018141 | -6658         | ENSG00000226650 | KIF4B        |
| NR4A2_Medium | chr5    | 157386622 | 157387022 | Promoter (2-3kb)  | 5       | 157384306 | 157390638 | 2316          | ENSG00000055163 | CYFIP2       |
| NR4A2_Medium | chr5    | 157453061 | 157453461 | Promoter (6-7kb)  | 5       | 157460019 | 157473100 | -6558         | ENSG00000172548 | NIPAL4       |
| NR4A2_Medium | chr5    | 157466834 | 157467234 | Promoter (6-7kb)  | 5       | 157460329 | 157468740 | 6505          | ENSG00000172548 | NIPAL4       |
| NR4A2_Medium | chr5    | 157575201 | 157575601 | Promoter (<=1kb)  | 5       | 157481227 | 157575741 | 140           | ENSG00000135074 | ADAM19       |
| NR4A2_Medium | chr5    | 157865695 | 157866095 | Promoter (6-7kb)  | 5       | 15        |           |               |                 |              |

| Condition    | peakChr | peakStart | peakEnd   | annotation        | geneChr | geneStart | geneEnd   | distanceToTSS | geneID          | geneSymbol   |
|--------------|---------|-----------|-----------|-------------------|---------|-----------|-----------|---------------|-----------------|--------------|
| NR4A2_Medium | chr5    | 173705215 | 173705615 | Promoter (9–10kb) | 5       | 173708142 | 173714961 | 9346          | ENSG00000253686 | LINC01484    |
| NR4A2_Medium | chr5    | 174067665 | 174068065 | Promoter (5–6kb)  | 5       | 174062572 | 174108447 | 5093          | ENSG00000170091 | NSG2         |
| NR4A2_Medium | chr5    | 174715491 | 174715891 | Promoter (8–9kb)  | 5       | 174724582 | 174730896 | -8691         | ENSG00000120149 | MSX2         |
| NR4A2_Medium | chr5    | 175476252 | 175476652 | Promoter (<=1kb)  | 5       | 175477062 | 175510207 | -410          | ENSG00000164466 | SFXN1        |
| NR4A2_Medium | chr5    | 175680985 | 175681385 | Promoter (1–2kb)  | 5       | 175683168 | 175710725 | -1783         | ENSG00000113749 | HRH2         |
| NR4A2_Medium | chr5    | 176151330 | 176151730 | Promoter (3–4kb)  | 5       | 176143450 | 176148047 | -3283         | ENSG00000248596 | LOC643201    |
| NR4A2_Medium | chr5    | 176413103 | 176413503 | Promoter (2–3kb)  | 5       | 176392642 | 176416261 | 2758          | ENSG00000175416 | CLTB         |
| NR4A2_Medium | chr5    | 176577062 | 176577462 | Promoter (9–10kb) | 5       | 176586651 | 176590661 | -9189         | ENSG00000074276 | CDHR2        |
| NR4A2_Medium | chr5    | 176617132 | 176617532 | Promoter (6–7kb)  | 5       | 176595802 | 176610156 | -6976         | ENSG00000169258 | GPRIN1       |
| NR4A2_Medium | chr5    | 176742957 | 176743357 | Promoter (<=1kb)  | 5       | 176743205 | 176743871 | 0             | ENSG00000248859 | LINC01574    |
| NR4A2_Medium | chr5    | 177089926 | 177090326 | Promoter (<=1kb)  | 5       | 177089603 | 177093068 | 323           | ENSG00000160867 | FGFR4        |
| NR4A2_Medium | chr5    | 177326996 | 177327396 | Promoter (7–8kb)  | 5       | 177331954 | 177334552 | 7156          | ENSG00000169223 | LMAN2        |
| NR4A2_Medium | chr5    | 177544553 | 177544953 | Promoter (5–6kb)  | 5       | 177537987 | 177539351 | -5202         | ENSG00000146067 | FAM193B      |
| NR4A2_Medium | chr5    | 177632161 | 177632561 | Promoter (<=1kb)  | 5       | 177619059 | 177631535 | -626          | NA              | LOC202181    |
| NR4A2_Medium | chr5    | 177704517 | 177704917 | Promoter (9–10kb) | 5       | 177713069 | 177714152 | 9235          | ENSG00000170074 | FAM153A      |
| NR4A2_Medium | chr5    | 178104233 | 178104633 | Promoter (8–9kb)  | 5       | 178113532 | 178126081 | -8899         | ENSG00000145911 | N4BP3        |
| NR4A2_Medium | chr5    | 178269457 | 178269857 | Promoter (3–4kb)  | 5       | 178263208 | 178265834 | -3623         | ENSG00000050767 | COL23A1      |
| NR4A2_Medium | chr5    | 178945327 | 178945727 | Promoter (2–3kb)  | 5       | 178942428 | 178948116 | 2899          | ENSG00000178187 | ZNF454       |
| NR4A2_Medium | chr5    | 178994987 | 178995387 | Promoter (<=1kb)  | 5       | 178978327 | 178995123 | 0             | ENSG00000113262 | GRM6         |
| NR4A2_Medium | chr5    | 179051679 | 179052079 | Promoter (8–9kb)  | 5       | 179060373 | 179083977 | -8294         | ENSG00000177932 | ZNF354C      |
| NR4A2_Medium | chr5    | 180213508 | 180213908 | Promoter (4–5kb)  | 5       | 180100795 | 180209211 | -4297         | ENSG00000146090 | RASGEF1C     |
| NR4A2_Medium | chr5    | 180243815 | 180244215 | Promoter (<=1kb)  | 5       | 180236526 | 180242900 | -915          | ENSG00000050748 | MAPK9        |
| NR4A2_Medium | chr5    | 180503398 | 180503798 | Promoter (8–9kb)  | 5       | 180494707 | 180564682 | 8691          | ENSG00000113300 | CNOT6        |
| NR4A2_Medium | chr5    | 180594779 | 180595179 | Promoter (3–4kb)  | 5       | 180590105 | 180591499 | -3280         | ENSG00000161055 | SCGB3A1      |
| NR4A2_Medium | chr5    | 180599589 | 180599989 | Promoter (8–9kb)  | 5       | 180590105 | 180591499 | -8090         | ENSG00000161055 | SCGB3A1      |
| NR4A2_Medium | chr5    | 181216872 | 181217272 | Promoter (5–6kb)  | 5       | 181222499 | 181234326 | -5227         | ENSG00000146063 | TRIM41       |
| NR4A2_Medium | chr5    | 181227679 | 181228079 | Promoter (2–3kb)  | 5       | 181224691 | 181233524 | 2988          | ENSG00000146063 | TRIM41       |
| NR4A2_Medium | chr6    | 686165    | 686565    | Promoter (6–7kb)  | 6       | 679143    | 693108    | 6543          | ENSG00000112685 | EXOC2        |
| NR4A2_Medium | chr6    | 690801    | 691201    | Promoter (1–2kb)  | 6       | 679143    | 693108    | 1907          | ENSG00000112685 | EXOC2        |
| NR4A2_Medium | chr6    | 1399161   | 1399561   | Promoter (8–9kb)  | 6       | 1390314   | 1390411   | -8750         | ENSG00000275859 | MIR6720      |
| NR4A2_Medium | chr6    | 1964948   | 1965348   | Promoter (4–5kb)  | 6       | 1959706   | 1960909   | -4039         | ENSG00000112699 | GMDS         |
| NR4A2_Medium | chr6    | 1966254   | 1966654   | Promoter (5–6kb)  | 6       | 1959706   | 1960909   | -5345         | ENSG00000112699 | GMDS         |
| NR4A2_Medium | chr6    | 2169856   | 2170256   | Promoter (5–6kb)  | 6       | 1623806   | 2175991   | 5735          | ENSG00000112699 | GMDS         |
| NR4A2_Medium | chr6    | 2635489   | 2635889   | Promoter (<=1kb)  | 6       | 2621947   | 2634619   | -870          | ENSG00000164385 | LINC01600    |
| NR4A2_Medium | chr6    | 2842801   | 2843201   | Promoter (<=1kb)  | 6       | 2835856   | 2841959   | -842          | ENSG00000021355 | SERPINB1     |
| NR4A2_Medium | chr6    | 3003054   | 3003454   | Promoter (<=1kb)  | 6       | 3004167   | 3010189   | -713          | ENSG00000124588 | NQO2         |
| NR4A2_Medium | chr6    | 3226642   | 3227042   | Promoter (<=1kb)  | 6       | 3224277   | 3227653   | 611           | ENSG00000137285 | TUBB2B       |
| NR4A2_Medium | chr6    | 3259512   | 3259912   | Promoter (<=1kb)  | 6       | 3259060   | 3291984   | 452           | ENSG00000180822 | PSMG4        |
| NR4A2_Medium | chr6    | 3437351   | 3437751   | Promoter (1–2kb)  | 6       | 3283874   | 3439418   | 1667          | ENSG00000137266 | SLC22A23     |
| NR4A2_Medium | chr6    | 5011668   | 5012068   | Promoter (7–8kb)  | 6       | 5001776   | 5004063   | -7605         | ENSG00000124787 | RPP40        |
| NR4A2_Medium | chr6    | 7339030   | 7339430   | Promoter (8–9kb)  | 6       | 7301333   | 7347446   | 8016          | ENSG00000124783 | SSR1         |
| NR4A2_Medium | chr6    | 10750110  | 10750510  | Promoter (<=1kb)  | 6       | 10749964  | 10756697  | 146           | ENSG00000137210 | TMEM14B      |
| NR4A2_Medium | chr6    | 11097290  | 11097690  | Promoter (3–4kb)  | 6       | 11094231  | 11135811  | 3059          | ENSG00000224531 | SMIM13       |
| NR4A2_Medium | chr6    | 11780924  | 11781324  | Promoter (1–2kb)  | 6       | 11735570  | 11779628  | -1296         | ENSG00000111863 | ADTRP        |
| NR4A2_Medium | chr6    | 11995123  | 11995523  | Promoter (5–6kb)  | 6       | 11990338  | 12001286  | 5763          | ENSG00000225102 | LOC101928253 |
| NR4A2_Medium | chr6    | 12591214  | 12591614  | Promoter (5–6kb)  | 6       | 12582915  | 12585404  | -5810         | ENSG00000234015 | LINC02530    |
| NR4A2_Medium | chr6    | 13056234  | 13056634  | Promoter (2–3kb)  | 6       | 13053457  | 13230404  | 2777          | ENSG00000112137 | PHACTR1      |
| NR4A2_Medium | chr6    | 14110246  | 14110646  | Promoter (6–7kb)  | 6       | 14117256  | 14136918  | -6610         | ENSG00000112149 | CD83         |
| NR4A2_Medium | chr6    | 15240131  | 15240531  | Promoter (5–6kb)  | 6       | 15246069  | 15522042  | -5538         | ENSG00000008083 | JARID2       |
| NR4A2_Medium | chr6    | 16136370  | 16136770  | Promoter (4–5kb)  | 6       | 16141556  | 16141624  | -4786         | ENSG00000263712 | MIR4639      |
| NR4A2_Medium | chr6    | 19753327  | 19753727  | Promoter (<=1kb)  | 6       | 19689825  | 19753113  | -214          | ENSG00000228412 | LNC-LBCS     |
| NR4A2_Medium | chr6    | 19807183  | 19807583  | Promoter (2–3kb)  | 6       | 19707453  | 19804827  | -2356         | ENSG00000228412 | LNC-LBCS     |
| NR4A2_Medium | chr6    | 19838549  | 19838949  | Promoter (1–2kb)  | 6       | 19837370  | 19842197  | 1179          | ENSG00000172201 | ID4          |
| NR4A2_Medium | chr6    | 20208362  | 20208762  | Promoter (3–4kb)  | 6       | 20099684  | 20212469  | 3707          | ENSG00000172197 | MBOAT1       |
| NR4A2_Medium | chr6    | 20410726  | 20411126  | Promoter (7–8kb)  | 6       | 20403679  | 20493714  | 7047          | ENSG00000112242 | E2F3         |
| NR4A2_Medium | chr6    | 21199111  | 21199511  | Promoter (1–2kb)  | 6       | 21200812  | 21231441  | -1301         | ENSG00000145996 | CDKAL1       |
| NR4A2_Medium | chr6    | 21764851  | 21765251  | Promoter (6–7kb)  | 6       | 21758478  | 22194224  | 6373          | NA              | CASC15       |
| NR4A2_Medium | chr6    | 21907121  | 21907521  | Promoter (<=1kb)  | 6       | 21908313  | 22111146  | -792          | NA              | CASC15       |
| NR4A2_Medium | chr6    | 21946457  | 21946857  | Promoter (7–8kb)  | 6       | 21954422  | 22195127  | -7565         | NA              | CASC15       |
| NR4A2_Medium | chr6    | 21980933  | 21981333  | Promoter (1–2kb)  | 6       | 21978973  | 22194227  | 1960          | NA              | CASC15       |
| NR4A2_Medium | chr6    | 24403344  | 24403744  | Promoter (<=1kb)  | 6       | 24403192  | 24418561  | 152           | ENSG00000124532 | MRS2         |
| NR4A2_Medium | chr6    | 25268012  | 25268412  | Promoter (6–7kb)  | 6       | 25230235  | 25261446  | -6566         | NA              | LOC101928663 |
| NR4A2_Medium | chr6    | 25500839  | 25501239  | Promoter (5–6kb)  | 6       | 25495121  | 25619693  | 5718          | ENSG00000079691 | CARMIL1      |
| NR4A2_Medium | chr6    | 25756473  | 25756873  | Promoter (1–2kb)  | 6       | 25754742  | 25781199  | 1731          | ENSG00000146039 | SLC17A4      |
| NR4A2_Medium | chr6    | 25881353  | 25881753  | Promoter (<=1kb)  | 6       | 25845100  | 25882286  | 533           | ENSG00000124564 | SLC17A3      |
| NR4A2_Medium | chr6    | 25929083  | 25929483  | Promoter (1–2kb)  | 6       | 25912754  | 25930611  | 1128          | ENSG00000112337 | SLC17A2      |
| NR4A2_Medium | chr6    | 26052273  | 26052673  | Promoter (3–4kb)  | 6       | 26055787  | 26056428  | 3755          | ENSG00000187837 | H1-2         |
| NR4A2_Medium | chr6    | 26053399  | 26053799  | Promoter (2–3kb)  | 6       | 26055787  | 26056428  | 2629          | ENSG00000187837 | H1-2         |
| NR4A2_Medium | chr6    | 26077544  | 26077944  | Promoter (9–10kb) | 6       | 26087281  | 26094368  | -9337         | ENSG00000010704 | HFE          |
| NR4A2_Medium | chr6    | 26087588  | 26087988  | Promoter (<=1kb)  | 6       | 26087439  | 26094553  | 149           | ENSG00000010704 | HFE          |
| NR4A2_Medium | chr6    | 26188476  | 26188876  | Promoter (<=1kb)  | 6       | 26188765  | 26189076  | 200           | ENSG00000277157 | H4C4         |
| NR4A2_Medium | chr6    | 26382593  | 26382993  | Promoter (<=1kb)  | 6       | 26383096  | 26394874  | -103          | ENSG00000124508 | BTN2A2       |
| NR4A2_Medium | chr6    | 28255290  | 28255690  | Promoter (3–4kb)  | 6       | 28241697  | 28252269  | -3021         | ENSG00000187626 | ZKSCAN4      |
| NR4A2_Medium | chr6    | 33595969  | 33596369  | Promoter (2–3kb)  | 6       | 33586106  | 33593338  | -2631         | ENSG00000197251 | LINC00336    |
| NR4A2_Medium | chr6    | 34072857  | 34073257  | Promoter (9–10kb) | 6       | 34022138  | 34063635  | -9222         | ENSG00000124493 | GRM4         |
| NR4A2_Medium | chr6    | 34154218  | 34154618  | Promoter (1–2kb)  | 6       | 34021854  | 34155622  | 1004          | ENSG00000124493 | GRM4         |
| NR4A2_Medium | chr6    | 34428855  | 34429255  | Promoter (2–3kb)  | 6       | 34284887  | 34426071  | -2784         | ENSG00000272325 | NUDT3        |
| NR4A2_Medium | chr6    | 34435653  | 34436053  | Promoter (9–10kb) | 6       | 34284887  | 34426071  | -9582         | ENSG00000272325 | NUDT3        |
| NR4A2_Medium | chr6    | 34516589  | 34516989  | Promoter (1–2kb)  | 6       | 34514890  | 34527694  | 1699          | ENSG00000124507 | PACSL1       |
| NR4A2_Medium | chr6    | 35259345  | 35259745  | Promoter (<=1kb)  | 6       | 35259471  | 35292642  | 0             | ENSG00000065029 | ZNF76        |
| NR4A2_Medium | chr6    | 35351670  | 35352070  | Promoter (9–10kb) | 6       | 35342614  | 35428178  | 9056          | ENSG00000112033 | PPARD        |
| NR4A2_Medium | chr6    | 35885600  | 35886000  | Promoter (9–10kb) | 6       | 35874240  | 35895719  | 9719          | ENSG00000096063 | SRPK1        |
| NR4A2_Medium | chr6    | 36379658  | 36380058  | Promoter (7–8kb)  | 6       | 36354091  | 36387566  | 7508          | ENSG00000010030 | ETV7         |
| NR4A2_Medium | chr6    | 36432905  | 36433305  | Promoter (9–10kb) | 6       | 36442767  | 36491143  | -9462         | ENSG00000112078 | KCTD20       |
| NR4A2_Medium | chr6    | 36705420  | 36705820  | Promoter (7–8kb)  | 6       | 36697826  | 36733184  | 7594          | ENSG00000255587 | RAB44        |
| NR4A2_Medium | chr6    | 36943672  | 36944072  | Promoter (4–5kb)  | 6       | 36948263  | 36964820  | -4191         | ENSG00000164530 | PI16         |
| NR4A2_Medium | chr6    | 36990165  | 36990565  | Promoter (3–4kb)  | 6       | 36968141  | 36986298  | -3867         | ENSG00000137409 | MTCH1        |
| NR4A2_Medium | chr6    | 37000735  | 37001135  | Promoter (4–5kb)  | 6       | 37005646  | 37010031  | -4511         | ENSG00000146192 | FGD2         |
| NR4A2_Medium | chr6    | 37266136  | 37266536  | Promoter (7–8kb)  | 6       | 37217324  | 37258155  | -7981         | ENSG00000172738 | TMEM217      |
| NR4A2_Medium | chr6    | 37436377  | 37436777  | Promoter (3–4kb)  | 6       | 37433221  | 37481508  | 3156          | ENSG00000137200 | CMTR1        |
| NR4A2_Medium | chr6    | 37490698  | 37491098  | Promoter (8–9kb)  | 6       | 37482938  | 37499893  | 8795          | ENSG00000198937 | CCDC167      |
| NR4A2_Medium | chr6    | 37556675  | 37557075  | Promoter (1–2kb)  | 6       | 37555365  | 37555422  | -1253         | ENSG00000263926 | MIR4462      |
| NR4A2_Medium | chr6    | 37937270  | 37937670  | Promoter (7–8kb)  | 6       | 37929959  | 38142331  | 7311          | ENSG00000156639 | ZFAND3       |
| NR4A2_Medium | chr6    | 38051591  | 38051991  | Promoter (9–10kb) | 6       | 38061611  | 38062660  | -9620         | ENSG00000156639 | ZFAND3       |
| NR4A2_Medium | chr6    | 39797063  | 39797463  | Promoter (4–5kb)  | 6       | 39793018  | 39904872  | 4045          | ENSG00000146122 | DAAM2        |
| NR4A2_Medium | chr6    | 40345358  |           |                   |         |           |           |               |                 |              |



| Condition    | peakChr | peakStart | peakEnd   | annotation        | geneChr | geneStart | geneEnd   | distanceToTSS | geneID            | geneSymbol   |
|--------------|---------|-----------|-----------|-------------------|---------|-----------|-----------|---------------|-------------------|--------------|
| NR4A2_Medium | chr6    | 42952422  | 42952822  | Promoter (7-8kb)  | 6       | 42960754  | 42963880  | -7932         | ENSG00000124713   | GNMT         |
| NR4A2_Medium | chr6    | 43221673  | 43222073  | Promoter (<=1kb)  | 6       | 43221757  | 43222997  | 0             | ENSG00000112659   | CUL9         |
| NR4A2_Medium | chr6    | 43293838  | 43294238  | Promoter (1-2kb)  | 6       | 43295694  | 43299520  | -1456         | ENSG00000137204   | SLC22A7      |
| NR4A2_Medium | chr6    | 43333923  | 43334323  | Promoter (2-3kb)  | 6       | 43307134  | 43331856  | -2067         | ENSG00000146215   | CRIP3        |
| NR4A2_Medium | chr6    | 43439542  | 43439942  | Promoter (<=1kb)  | 6       | 43438711  | 43442061  | 831           | ENSG00000124574   | ABCC10       |
| NR4A2_Medium | chr6    | 43456878  | 43457278  | Promoter (<=1kb)  | 6       | 43450354  | 43456632  | -246          | ENSG00000171462   | DLK2         |
| NR4A2_Medium | chr6    | 43501966  | 43502366  | Promoter (<=1kb)  | 6       | 43501526  | 43506553  | 440           | ENSG00000137221   | TJAP1        |
| NR4A2_Medium | chr6    | 43534688  | 43535088  | Promoter (5-6kb)  | 6       | 43524534  | 43528913  | -5775         | ENSG00000124571   | XPO5         |
| NR4A2_Medium | chr6    | 43541865  | 43542265  | Promoter (5-6kb)  | 6       | 43528159  | 43547675  | 5410          | ENSG00000124571   | XPO5         |
| NR4A2_Medium | chr6    | 44215536  | 44215936  | Promoter (<=1kb)  | 6       | 44216926  | 44218234  | -990          | ENSG00000262179   | MYMX         |
| NR4A2_Medium | chr6    | 44348997  | 44349397  | Promoter (6-7kb)  | 6       | 44342940  | 44377164  | 6057          | ENSG00000249481   | SPATS1       |
| NR4A2_Medium | chr6    | 46645299  | 46645699  | Promoter (7-8kb)  | 6       | 46549580  | 46652818  | 7119          | ENSG00000146233   | CYP39A1      |
| NR4A2_Medium | chr6    | 46798223  | 46798623  | Promoter (4-5kb)  | 6       | 46793399  | 46839782  | 4824          | ENSG00000112818   | MEP1A        |
| NR4A2_Medium | chr6    | 47033989  | 47034389  | Promoter (4-5kb)  | 6       | 47000111  | 47029090  | -4899         | ENSG00000153292   | ADGRF1       |
| NR4A2_Medium | chr6    | 47686534  | 47686934  | Promoter (<=1kb)  | 6       | 47685864  | 47722021  | 670           | ENSG00000153294   | ADGRF4       |
| NR4A2_Medium | chr6    | 47692432  | 47692832  | Promoter (5-6kb)  | 6       | 47698553  | 47722021  | -5721         | ENSG00000153294   | ADGRF4       |
| NR4A2_Medium | chr6    | 49613210  | 49613610  | Promoter (1-2kb)  | 6       | 49612409  | 49615267  | 1657          | ENSG00000112077   | RHAG         |
| NR4A2_Medium | chr6    | 51598275  | 51598675  | Promoter (1-2kb)  | 6       | 51599723  | 51622541  | -1048         | NA                | LOC101927082 |
| NR4A2_Medium | chr6    | 52577654  | 52578054  | Promoter (<=1kb)  | 6       | 52577634  | 52589888  | 20            | ENSG00000225791   | TRAM2-AS1    |
| NR4A2_Medium | chr6    | 52916961  | 52917361  | Promoter (7-8kb)  | 6       | 52896646  | 52909698  | -7263         | ENSG00000174156   | GSTA3        |
| NR4A2_Medium | chr6    | 52998957  | 52999357  | Promoter (3-4kb)  | 6       | 52995621  | 52995948  | 3336          | ENSG00000202198   | RN7SK        |
| NR4A2_Medium | chr6    | 53049602  | 53050002  | Promoter (1-2kb)  | 6       | 53051991  | 53073638  | -1989         | ENSG00000112146   | FBXO9        |
| NR4A2_Medium | chr6    | 53543271  | 53543671  | Promoter (<=1kb)  | 6       | 53498387  | 53544633  | 962           | ENSG00000001084   | GCLC         |
| NR4A2_Medium | chr6    | 56168010  | 56168410  | Promoter (1-2kb)  | 6       | 56125428  | 56166937  | -1073         | ENSG00000124749   | COL21A1      |
| NR4A2_Medium | chr6    | 56622228  | 56622628  | Promoter (5-6kb)  | 6       | 56617200  | 56628018  | 5390          | ENSG00000151914   | DST          |
| NR4A2_Medium | chr6    | 63575397  | 63575797  | Promoter (<=1kb)  | 6       | 63576488  | 63581462  | -691          | ENSG00000112245   | PTP4A1       |
| NR4A2_Medium | chr6    | 69758044  | 69758444  | Promoter (8-9kb)  | 6       | 69675974  | 69749408  | -8636         | ENSG00000168216   | LMBRD1       |
| NR4A2_Medium | chr6    | 70243453  | 70243853  | Promoter (2-3kb)  | 6       | 70216524  | 70246303  | 2450          | ENSG00000112280   | COL9A1       |
| NR4A2_Medium | chr6    | 70477622  | 70478022  | Promoter (4-5kb)  | 6       | 70482133  | 70504960  | -4111         | ENSG00000082269   | FAM135A      |
| NR4A2_Medium | chr6    | 71885044  | 71885444  | Promoter (1-2kb)  | 6       | 71886703  | 72264004  | -1259         | ENSG00000079841   | RIMS1        |
| NR4A2_Medium | chr6    | 73406074  | 73406474  | Promoter (<=1kb)  | 6       | 73406965  | 73414007  | -491          | ENSG00000080007   | DDX43        |
| NR4A2_Medium | chr6    | 73452247  | 73452647  | Promoter (<=1kb)  | 6       | 73413515  | 73452259  | 0             | ENSG00000164430   | CGAS         |
| NR4A2_Medium | chr6    | 75883728  | 75884128  | Promoter (6-7kb)  | 6       | 75890210  | 75908560  | -6082         | ENSG00000196586   | MYO6         |
| NR4A2_Medium | chr6    | 81905056  | 81905456  | Promoter (9-10kb) | 6       | 81844604  | 81895717  | -9339         | NA                | LINC02542    |
| NR4A2_Medium | chr6    | 83925015  | 83925415  | Promoter (<=1kb)  | 6       | 83926269  | 83955375  | -854          | ENSG00000065615   | CYB5R4       |
| NR4A2_Medium | chr6    | 84036439  | 84036839  | Promoter (2-3kb)  | 6       | 84033772  | 84090881  | 2667          | ENSG00000135324   | MRAP2        |
| NR4A2_Medium | chr6    | 85464744  | 85465144  | Promoter (6-7kb)  | 6       | 85471381  | 85492161  | -6237         | ENSG00000135318   | NT5E         |
| NR4A2_Medium | chr6    | 87654481  | 87654881  | Promoter (3-4kb)  | 6       | 87650930  | 87653214  | 3551          | ENSG00000135336   | ORC3         |
| NR4A2_Medium | chr6    | 89642206  | 89642606  | Promoter (3-4kb)  | 6       | 89636913  | 89638749  | -3457         | ENSG00000083099   | LYRM2        |
| NR4A2_Medium | chr6    | 89646428  | 89646828  | Promoter (7-8kb)  | 6       | 89636913  | 89638749  | -7679         | ENSG00000083099   | LYRM2        |
| NR4A2_Medium | chr6    | 90559042  | 90559442  | Promoter (5-6kb)  | 6       | 90515683  | 90553464  | -5578         | ENSG00000135341   | MAP3K7       |
| NR4A2_Medium | chr6    | 97307449  | 97307849  | Promoter (1-2kb)  | 6       | 97306003  | 97708194  | 1446          | ENSG00000271860   | LOC101927314 |
| NR4A2_Medium | chr6    | 97450680  | 97451080  | Promoter (9-10kb) | 6       | 97440853  | 98099256  | 9827          | ENSG00000271860   | LOC101927314 |
| NR4A2_Medium | chr6    | 99385374  | 99385774  | Promoter (7-8kb)  | 6       | 99369404  | 99377454  | -7920         | ENSG00000132423   | COQ3         |
| NR4A2_Medium | chr6    | 100387292 | 100387692 | Promoter (6-7kb)  | 6       | 100391083 | 100394042 | 6350          | ENSG00000112246   | SIM1         |
| NR4A2_Medium | chr6    | 105137827 | 105138227 | Promoter (<=1kb)  | 6       | 105137823 | 105159037 | 4             | ENSG00000203808   | BVES-AS1     |
| NR4A2_Medium | chr6    | 105188960 | 105189360 | Promoter (8-9kb)  | 6       | 105157900 | 105180014 | -8946         | ENSG00000132429   | POPODC3      |
| NR4A2_Medium | chr6    | 105404945 | 105405345 | Promoter (1-2kb)  | 6       | 105273220 | 105403084 | -1861         | ENSG00000085377   | PREP         |
| NR4A2_Medium | chr6    | 106361869 | 106362269 | Promoter (1-2kb)  | 6       | 106360808 | 106571978 | 1061          | ENSG00000112297   | CRYBG1       |
| NR4A2_Medium | chr6    | 106966181 | 106966581 | Promoter (7-8kb)  | 6       | 106971380 | 106974039 | 7458          | ENSG00000272398   | CD24         |
| NR4A2_Medium | chr6    | 107104633 | 107105033 | Promoter (9-10kb) | 6       | 107065187 | 107114432 | 9399          | ENSG00000178409   | BEND3        |
| NR4A2_Medium | chr6    | 107833205 | 107833605 | Promoter (8-9kb)  | 6       | 107704104 | 107824317 | -8888         | ENSG00000146285   | SCML4        |
| NR4A2_Medium | chr6    | 108289175 | 108289575 | Promoter (5-6kb)  | 6       | 108294991 | 108346990 | -5416         | ENSG00000135537   | AFG1L        |
| NR4A2_Medium | chr6    | 108742747 | 108743147 | Promoter (8-9kb)  | 6       | 108751654 | 108768456 | -8507         | ENSG00000203801   | LINC00222    |
| NR4A2_Medium | chr6    | 108957167 | 108957567 | Promoter (1-2kb)  | 6       | 108959460 | 108965117 | -1893         | ENSG00000118690   | ARMC2        |
| NR4A2_Medium | chr6    | 109227727 | 109228127 | Promoter (8-9kb)  | 6       | 109236614 | 109271014 | -8487         | ENSG00000203799   | CCDC162P     |
| NR4A2_Medium | chr6    | 109234741 | 109235141 | Promoter (1-2kb)  | 6       | 109236614 | 109271014 | -1473         | ENSG00000203799   | CCDC162P     |
| NR4A2_Medium | chr6    | 109510821 | 109511221 | Promoter (4-5kb)  | 6       | 109493274 | 109506418 | -4403         | ENSG00000155085   | AK9          |
| NR4A2_Medium | chr6    | 110419323 | 110419723 | Promoter (3-4kb)  | 6       | 110391784 | 110415575 | -3748         | ENSG00000203797   | DDO          |
| NR4A2_Medium | chr6    | 110854782 | 110855182 | Promoter (6-7kb)  | 6       | 110848546 | 110848673 | 6236          | ENSG00000212587   | SNORA40C     |
| NR4A2_Medium | chr6    | 110974290 | 110974690 | Promoter (7-8kb)  | 6       | 110982015 | 111024327 | -7325         | ENSG00000197498   | RPF2         |
| NR4A2_Medium | chr6    | 111042903 | 111043303 | Promoter (4-5kb)  | 6       | 111046868 | 111047521 | 4218          | NA                | GSTM2P1      |
| NR4A2_Medium | chr6    | 111086337 | 111086737 | Promoter (<=1kb)  | 6       | 111087503 | 111177706 | -766          | ENSG00000112394   | SLC16A10     |
| NR4A2_Medium | chr6    | 113858028 | 113858428 | Promoter (<=1kb)  | 6       | 113857345 | 113863475 | 683           | ENSG00000277443   | MARCKS       |
| NR4A2_Medium | chr6    | 113974500 | 113974900 | Promoter (2-3kb)  | 6       | 113971518 | 113995869 | 2982          | ENSG00000228624   | HDAC2-AS2    |
| NR4A2_Medium | chr6    | 114272551 | 114272951 | Promoter (8-9kb)  | 6       | 114281812 | 114468574 | -8861         | ENSG00000228624   | HDAC2-AS2    |
| NR4A2_Medium | chr6    | 114279648 | 114280048 | Promoter (1-2kb)  | 6       | 114281812 | 114468574 | -1764         | ENSG00000228624   | HDAC2-AS2    |
| NR4A2_Medium | chr6    | 114341029 | 114341429 | Promoter (1-2kb)  | 6       | 114055586 | 114343045 | 1616          | ENSG00000249853   | HS3ST5       |
| NR4A2_Medium | chr6    | 116097798 | 116098198 | Promoter (2-3kb)  | 6       | 116100851 | 116145495 | -2653         | ENSG00000178425   | NT5DC1       |
| NR4A2_Medium | chr6    | 116106091 | 116106491 | Promoter (4-5kb)  | 6       | 116110852 | 116118092 | -4361         | ENSG00000178425   | NT5DC1       |
| NR4A2_Medium | chr6    | 116153304 | 116153704 | Promoter (5-6kb)  | 6       | 116125339 | 116158747 | 5043          | ENSG00000123500   | COL10A1      |
| NR4A2_Medium | chr6    | 116398081 | 116398481 | Promoter (<=1kb)  | 6       | 116399395 | 116463696 | -914          | ENSG00000111817   | DSE          |
| NR4A2_Medium | chr6    | 116691059 | 116691459 | Promoter (9-10kb) | 6       | 116681211 | 116741867 | 9848          | ENSG00000196911   | KPNA5        |
| NR4A2_Medium | chr6    | 117450563 | 117450963 | Promoter (2-3kb)  | 6       | 117453817 | 117503964 | -2854         | ENSG00000164465   | DCBLD1       |
| NR4A2_Medium | chr6    | 117668957 | 117669357 | Promoter (6-7kb)  | 6       | 117675469 | 117710727 | -6112         | ENSG00000153989   | NUS1         |
| NR4A2_Medium | chr6    | 121427095 | 121427495 | Promoter (8-9kb)  | 6       | 121435595 | 121449715 | -8100         | ENSG00000152661   | GJA1         |
| NR4A2_Medium | chr6    | 123445942 | 123446342 | Promoter (6-7kb)  | 6       | 123439738 | 123490956 | 6204          | NA                | TRDN-AS1     |
| NR4A2_Medium | chr6    | 123794783 | 123795183 | Promoter (8-9kb)  | 6       | 123803865 | 124825640 | -8682         | ENSG00000188580   | NKAIN2       |
| NR4A2_Medium | chr6    | 123802941 | 123803341 | Promoter (<=1kb)  | 6       | 123803865 | 124825640 | -524          | ENSG00000188580   | NKAIN2       |
| NR4A2_Medium | chr6    | 124821143 | 124821543 | Promoter (2-3kb)  | 6       | 124818399 | 124823623 | 2744          | ENSG00000188580   | NKAIN2       |
| NR4A2_Medium | chr6    | 124984324 | 124984724 | Promoter (<=1kb)  | 6       | 124983368 | 125083515 | 956           | ENSG00000146373   | RNF217       |
| NR4A2_Medium | chr6    | 127117825 | 127118225 | Promoter (<=1kb)  | 6       | 127118671 | 127199481 | -446          | ENSG00000146374   | RSPO3        |
| NR4A2_Medium | chr6    | 127455580 | 127455980 | Promoter (1-2kb)  | 6       | 127450046 | 127454242 | -1338         | ENSG00000189367   | KIAA0408     |
| NR4A2_Medium | chr6    | 127471161 | 127471561 | Promoter (3-4kb)  | 6       | 127450187 | 127475473 | 3912          | ENSG00000255330   | SOGA3        |
| NR4A2_Medium | chr6    | 130858507 | 130858907 | Promoter (<=1kb)  | 6       | 130840373 | 130858328 | -179          | ENSG00000079819   | EPB41L2      |
| NR4A2_Medium | chr6    | 131586105 | 131586505 | Promoter (5-6kb)  | 6       | 131590410 | 131591984 | 5479          | ENSG00000112282   | MED23        |
| NR4A2_Medium | chr6    | 131806214 | 131806614 | Promoter (1-2kb)  | 6       | 131808016 | 131851423 | -1402         | ENSG00000197594   | ENPP1        |
| NR4A2_Medium | chr6    | 132825722 | 132826122 | Promoter (8-9kb)  | 6       | 132817219 | 132817348 | 8503          | ENSG00000200534   | SNORA33      |
| NR4A2_Medium | chr6    | 134226281 | 134226681 | Promoter (3-4kb)  | 6       | 134173064 | 134230467 | 3786          | ENSG00000118515   | SGK1         |
| NR4A2_Medium | chr6    | 134239117 | 134239517 | Promoter (8-9kb)  | 6       | 134173064 | 134230467 | -8650         | ENSG00000118515   | SGK1         |
| NR4A2_Medium | chr6    | 134241215 | 134241615 | Promoter (7-8kb)  | 6       | 134173081 | 134249540 | 7925          | ENSG00000118515   | SGK1         |
| NR4A2_Medium | chr6    | 134502725 | 134503125 | Promoter (5-6kb)  | 6       | 134496878 | 134504018 | 5847          | ENSG00000236700   | LINC01010    |
| NR4A2_Medium | chr6    | 134932691 | 134933091 | Promoter (3-4kb)  | 6       | 134918530 | 134929161 | -3530         | ENSG00000118514   | ALDH8A1      |
| NR4A2_Medium | chr6    | 135213167 | 135213567 | Promoter (9-10kb) | 6       | 135203217 | 135203950 | 9950          | ENSG00000118513</ |              |

| Condition    | peakChr | peakStart | peakEnd   | annotation        | geneChr | geneStart | geneEnd   | distanceToTSS | geneID          | geneSymbol   |
|--------------|---------|-----------|-----------|-------------------|---------|-----------|-----------|---------------|-----------------|--------------|
| NR4A2_Medium | chr6    | 146595738 | 146596138 | Promoter (2-3kb)  | 6       | 146594516 | 146598931 | 2793          | ENSG00000237468 | LOC101928661 |
| NR4A2_Medium | chr6    | 149248098 | 149248498 | Promoter (9-10kb) | 6       | 149247321 | 149257543 | 9045          | ENSG00000225924 | TAB2-AS1     |
| NR4A2_Medium | chr6    | 149596310 | 149596710 | Promoter (2-3kb)  | 6       | 149594084 | 149594543 | 2226          | NA              | RPS18P9      |
| NR4A2_Medium | chr6    | 149883419 | 149883819 | Promoter (<=1kb)  | 6       | 149884431 | 149919506 | -612          | ENSG00000223701 | RAET1E-AS1   |
| NR4A2_Medium | chr6    | 149922647 | 149923047 | Promoter (<=1kb)  | 6       | 149916913 | 149923010 | 0             | ENSG00000203722 | RAET1G       |
| NR4A2_Medium | chr6    | 149998977 | 149999377 | Promoter (5-6kb)  | 6       | 149998019 | 150005144 | 5767          | ENSG00000218358 | RAET1K       |
| NR4A2_Medium | chr6    | 150906744 | 150907144 | Promoter (1-2kb)  | 6       | 150905670 | 150912948 | 1074          | ENSG00000120254 | MTHFD1L      |
| NR4A2_Medium | chr6    | 150970982 | 150971382 | Promoter (<=1kb)  | 6       | 150971948 | 151009958 | -566          | ENSG00000120254 | MTHFD1L      |
| NR4A2_Medium | chr6    | 151347854 | 151348254 | Promoter (6-7kb)  | 6       | 151341702 | 151349186 | 6152          | ENSG00000131016 | AKAP12       |
| NR4A2_Medium | chr6    | 155280277 | 155280677 | Promoter (4-5kb)  | 6       | 155257977 | 155285199 | 4522          | ENSG00000029639 | TFB1M        |
| NR4A2_Medium | chr6    | 157023828 | 157024228 | Promoter (1-2kb)  | 6       | 157022286 | 157208694 | 1542          | ENSG00000049618 | ARID1B       |
| NR4A2_Medium | chr6    | 157550053 | 157550453 | Promoter (7-8kb)  | 6       | 157542589 | 157628603 | 7464          | ENSG00000175048 | ZDHHC14      |
| NR4A2_Medium | chr6    | 158006086 | 158006486 | Promoter (4-5kb)  | 6       | 158001107 | 158002383 | 4979          | ENSG00000233496 | SYNJ2-IT1    |
| NR4A2_Medium | chr6    | 159719935 | 159720335 | Promoter (5-6kb)  | 6       | 159725585 | 159756319 | -5250         | ENSG00000146457 | WTAP         |
| NR4A2_Medium | chr6    | 159813765 | 159814165 | Promoter (4-5kb)  | 6       | 159808928 | 159816595 | 4837          | ENSG00000146453 | PNLDC1       |
| NR4A2_Medium | chr6    | 160090392 | 160090792 | Promoter (2-3kb)  | 6       | 160093082 | 160096212 | -2290         | ENSG00000213073 | CHP1P2       |
| NR4A2_Medium | chr6    | 160218864 | 160219300 | Promoter (<=1kb)  | 6       | 160217014 | 160218284 | -580          | ENSG00000112499 | SLC22A2      |
| NR4A2_Medium | chr6    | 163044791 | 163045191 | Promoter (1-2kb)  | 6       | 163042557 | 163046685 | 1494          | ENSG00000225437 | PACRG-AS2    |
| NR4A2_Medium | chr6    | 163329363 | 163329763 | Promoter (4-5kb)  | 6       | 163306907 | 163324530 | -4833         | ENSG00000281692 | PACRG-AS1    |
| NR4A2_Medium | chr6    | 166341818 | 166342218 | Promoter (<=1kb)  | 6       | 166319728 | 166342545 | 327           | ENSG00000198818 | SFT2D1       |
| NR4A2_Medium | chr6    | 166415979 | 166416379 | Promoter (7-8kb)  | 6       | 166412296 | 166423984 | 7605          | ENSG00000071242 | RP56KA2      |
| NR4A2_Medium | chr6    | 167169421 | 167169821 | Promoter (<=1kb)  | 6       | 167170619 | 167182908 | -798          | NA              | TCP10L2      |
| NR4A2_Medium | chr6    | 167878821 | 167879221 | Promoter (1-2kb)  | 6       | 167880481 | 167912164 | -1260         | ENSG00000130396 | AFDN         |
| NR4A2_Medium | chr6    | 168026974 | 168027374 | Promoter (3-4kb)  | 6       | 168030535 | 168035773 | -3161         | ENSG00000125337 | KIF25        |
| NR4A2_Medium | chr6    | 168088980 | 168089380 | Promoter (3-4kb)  | 6       | 168053166 | 168093012 | 3632          | ENSG00000153303 | FRMD1        |
| NR4A2_Medium | chr6    | 168659422 | 168659823 | Promoter (6-7kb)  | 6       | 168653203 | 168673445 | 6219          | ENSG00000112562 | SMOC2        |
| NR4A2_Medium | chr6    | 169218760 | 169219160 | Promoter (4-5kb)  | 6       | 169217454 | 169223440 | 4280          | ENSG00000186340 | THBS2        |
| NR4A2_Medium | chr6    | 169650079 | 169650479 | Promoter (<=1kb)  | 6       | 169457212 | 169649233 | -846          | ENSG00000184465 | WDR27        |
| NR4A2_Medium | chr7    | 3737000   | 3741000   | Promoter (5-6kb)  | 7       | 379359    | 382712    | -5259         | ENSG00000249574 | LOC442497    |
| NR4A2_Medium | chr7    | 511187    | 511587    | Promoter (1-2kb)  | 7       | 500778    | 513467    | 1880          | ENSG00000197461 | PDGFA        |
| NR4A2_Medium | chr7    | 527575    | 527975    | Promoter (5-6kb)  | 7       | 522573    | 525232    | 5002          | ENSG00000223855 | HRAT92       |
| NR4A2_Medium | chr7    | 767769    | 768169    | Promoter (<=1kb)  | 7       | 768475    | 786044    | -306          | ENSG00000164818 | DNAAF5       |
| NR4A2_Medium | chr7    | 929812    | 930212    | Promoter (2-3kb)  | 7       | 900533    | 927514    | -2298         | ENSG00000105963 | ADAP1        |
| NR4A2_Medium | chr7    | 1083400   | 1083800   | Promoter (1-2kb)  | 7       | 1082208   | 1092881   | 1192          | ENSG00000164850 | GPER1        |
| NR4A2_Medium | chr7    | 1165397   | 1165797   | Promoter (4-5kb)  | 7       | 1160596   | 1165607   | 4801          | ENSG00000229043 | ZFAND2A-DT   |
| NR4A2_Medium | chr7    | 1461792   | 1462192   | Promoter (2-3kb)  | 7       | 1434359   | 1459470   | -2322         | ENSG00000164877 | MICALL2      |
| NR4A2_Medium | chr7    | 1541529   | 1541929   | Promoter (2-3kb)  | 7       | 1538708   | 1540373   | 2821          | ENSG00000198517 | MAFK         |
| NR4A2_Medium | chr7    | 1551578   | 1551978   | Promoter (<=1kb)  | 7       | 1546229   | 1550930   | -648          | ENSG00000164855 | TMEM184A     |
| NR4A2_Medium | chr7    | 1701129   | 1701529   | Promoter (7-8kb)  | 7       | 1709162   | 1747954   | -7633         | ENSG00000225968 | ELFN1        |
| NR4A2_Medium | chr7    | 1852996   | 1853396   | Promoter (8-9kb)  | 7       | 1844180   | 1844253   | -8743         | ENSG00000265089 | MIR4655      |
| NR4A2_Medium | chr7    | 1866877   | 1867277   | Promoter (5-6kb)  | 7       | 1815793   | 1872756   | 5479          | ENSG00000002822 | MAD1L1       |
| NR4A2_Medium | chr7    | 1934671   | 1935071   | Promoter (5-6kb)  | 7       | 1898200   | 1940549   | 5478          | ENSG00000002822 | MAD1L1       |
| NR4A2_Medium | chr7    | 2095164   | 2095564   | Promoter (5-6kb)  | 7       | 2069194   | 2089251   | -5913         | ENSG00000002822 | MAD1L1       |
| NR4A2_Medium | chr7    | 2200610   | 2201010   | Promoter (7-8kb)  | 7       | 2069194   | 2193475   | -7135         | ENSG00000002822 | MAD1L1       |
| NR4A2_Medium | chr7    | 2216412   | 2216812   | Promoter (<=1kb)  | 7       | 2200265   | 2215927   | -485          | ENSG00000002822 | MAD1L1       |
| NR4A2_Medium | chr7    | 2252797   | 2253197   | Promoter (3-4kb)  | 7       | 2249285   | 2251146   | 3512          | ENSG00000106268 | NUDT1        |
| NR4A2_Medium | chr7    | 2257019   | 2257419   | Promoter (<=1kb)  | 7       | 2257515   | 2257577   | 158           | ENSG00000284047 | MIR6836      |
| NR4A2_Medium | chr7    | 2555473   | 2555873   | Promoter (<=1kb)  | 7       | 2537810   | 2555524   | 0             | ENSG00000106009 | BRAT1        |
| NR4A2_Medium | chr7    | 4230109   | 4230524   | Promoter (2-3kb)  | 7       | 4232887   | 4237671   | -2363         | ENSG00000146555 | SDK1         |
| NR4A2_Medium | chr7    | 4793347   | 4793747   | Promoter (3-4kb)  | 7       | 4789837   | 4791727   | 3510          | ENSG00000242802 | AP5Z1        |
| NR4A2_Medium | chr7    | 4820452   | 4820852   | Promoter (5-6kb)  | 7       | 4805245   | 4815333   | -5119         | ENSG00000157927 | RADIL        |
| NR4A2_Medium | chr7    | 4855623   | 4856023   | Promoter (6-7kb)  | 7       | 4857738   | 4862030   | 6007          | ENSG00000218823 | PAPOLB       |
| NR4A2_Medium | chr7    | 5305195   | 5305595   | Promoter (5-6kb)  | 7       | 5299329   | 5303680   | 5866          | ENSG00000164638 | SLC29A4      |
| NR4A2_Medium | chr7    | 5390242   | 5390642   | Promoter (2-3kb)  | 7       | 5376114   | 5388029   | -2213         | ENSG00000182095 | TNRC18       |
| NR4A2_Medium | chr7    | 5486314   | 5486714   | Promoter (9-10kb) | 7       | 5495819   | 5495917   | 9203          | ENSG00000207973 | MIR589       |
| NR4A2_Medium | chr7    | 5818202   | 5818602   | Promoter (4-5kb)  | 7       | 5823160   | 5847311   | -4558         | NA              | ZNF815P      |
| NR4A2_Medium | chr7    | 6126043   | 6126443   | Promoter (9-10kb) | 7       | 6116480   | 6155147   | 9563          | ENSG00000106346 | USP42        |
| NR4A2_Medium | chr7    | 6608160   | 6608560   | Promoter (7-8kb)  | 7       | 6615610   | 6624290   | -7050         | ENSG00000236609 | ZNF853       |
| NR4A2_Medium | chr7    | 6642697   | 6643097   | Promoter (<=1kb)  | 7       | 6641885   | 6644565   | 812           | ENSG00000205903 | ZNF316       |
| NR4A2_Medium | chr7    | 6702892   | 6703292   | Promoter (1-2kb)  | 7       | 6688433   | 6700914   | -1978         | ENSG00000164631 | ZNF12        |
| NR4A2_Medium | chr7    | 7710696   | 7711096   | Promoter (7-8kb)  | 7       | 7636518   | 7718607   | 7511          | ENSG00000106399 | RPA3         |
| NR4A2_Medium | chr7    | 8152565   | 8152965   | Promoter (4-5kb)  | 7       | 8141765   | 8157764   | 4799          | ENSG00000003147 | ICA1         |
| NR4A2_Medium | chr7    | 8227332   | 8227732   | Promoter (8-9kb)  | 7       | 8113923   | 8235926   | 8194          | ENSG00000003147 | ICA1         |
| NR4A2_Medium | chr7    | 11838664  | 11839064  | Promoter (6-7kb)  | 7       | 11370437  | 11832198  | -6466         | ENSG00000005108 | THSD7A       |
| NR4A2_Medium | chr7    | 12471227  | 12471627  | Promoter (1-2kb)  | 7       | 12469621  | 12542222  | 1606          | ENSG00000226690 | LOC102725191 |
| NR4A2_Medium | chr7    | 15356038  | 15356438  | Promoter (9-10kb) | 7       | 15306235  | 15366187  | 9749          | ENSG00000187546 | AGMO         |
| NR4A2_Medium | chr7    | 15367451  | 15367851  | Promoter (1-2kb)  | 7       | 15358214  | 15366222  | -1229         | ENSG00000187546 | AGMO         |
| NR4A2_Medium | chr7    | 15659975  | 15660375  | Promoter (7-8kb)  | 7       | 15667947  | 15681980  | -7572         | ENSG00000237070 | LOC105375166 |
| NR4A2_Medium | chr7    | 16695975  | 16696375  | Promoter (7-8kb)  | 7       | 16688525  | 16706197  | 7450          | ENSG00000136261 | BZW2         |
| NR4A2_Medium | chr7    | 20211128  | 20211528  | Promoter (5-6kb)  | 7       | 20170228  | 20217352  | 5824          | ENSG00000183742 | MACC1        |
| NR4A2_Medium | chr7    | 21460813  | 21461213  | Promoter (9-10kb) | 7       | 21471058  | 21471146  | -9845         | ENSG00000221783 | MIR1183      |
| NR4A2_Medium | chr7    | 21617466  | 21617866  | Promoter (<=1kb)  | 7       | 21618194  | 21636078  | -328          | ENSG00000105877 | DNAH11       |
| NR4A2_Medium | chr7    | 21910850  | 21911250  | Promoter (5-6kb)  | 7       | 21900901  | 21905709  | -5141         | ENSG00000164649 | CDC47L       |
| NR4A2_Medium | chr7    | 22140329  | 22140729  | Promoter (4-5kb)  | 7       | 22125232  | 22136072  | -4257         | ENSG00000136237 | RAPGEF5      |
| NR4A2_Medium | chr7    | 22290401  | 22290801  | Promoter (<=1kb)  | 7       | 22191439  | 22291241  | 440           | ENSG00000136237 | RAPGEF5      |
| NR4A2_Medium | chr7    | 23441083  | 23441483  | Promoter (9-10kb) | 7       | 23351480  | 23431303  | -9780         | ENSG00000136231 | IGF2BP3      |
| NR4A2_Medium | chr7    | 23726261  | 23726661  | Promoter (3-4kb)  | 7       | 23722760  | 23754327  | 3501          | ENSG00000196335 | STK31        |
| NR4A2_Medium | chr7    | 24654540  | 24654940  | Promoter (8-9kb)  | 7       | 24663474  | 24666046  | -8534         | ENSG00000105926 | MPP6         |
| NR4A2_Medium | chr7    | 24728624  | 24729024  | Promoter (3-4kb)  | 7       | 24708252  | 24724784  | -3840         | ENSG00000105928 | GSDME        |
| NR4A2_Medium | chr7    | 24729531  | 24729931  | Promoter (4-5kb)  | 7       | 24708252  | 24724784  | -4747         | ENSG00000105928 | GSDME        |
| NR4A2_Medium | chr7    | 24982376  | 24982776  | Promoter (<=1kb)  | 7       | 24871983  | 24981634  | -742          | ENSG00000070882 | OSBPL3       |
| NR4A2_Medium | chr7    | 25659303  | 25659703  | Promoter (1-2kb)  | 7       | 25655472  | 25658058  | -1245         | ENSG00000223561 | LOC646588    |
| NR4A2_Medium | chr7    | 26384077  | 26384477  | Promoter (7-8kb)  | 7       | 26372332  | 26376701  | -7376         | ENSG00000225792 | LOC105375304 |
| NR4A2_Medium | chr7    | 27148746  | 27149146  | Promoter (<=1kb)  | 7       | 27150052  | 27152726  | -906          | ENSG00000254369 | HOXA-AS3     |
| NR4A2_Medium | chr7    | 29478929  | 29479329  | Promoter (<=1kb)  | 7       | 29479712  | 29514328  | -383          | ENSG00000106069 | CHN2         |
| NR4A2_Medium | chr7    | 30394371  | 30394771  | Promoter (3-4kb)  | 7       | 30390908  | 30412375  | 3463          | ENSG00000281404 | LINC01176    |
| NR4A2_Medium | chr7    | 30427879  | 30428279  | Promoter (5-6kb)  | 7       | 30425209  | 30433414  | 5135          | ENSG00000106100 | NOD1         |
| NR4A2_Medium | chr7    | 30694942  | 30695342  | Promoter (2-3kb)  | 7       | 30697985  | 30755970  | -2643         | ENSG00000241644 | INMT         |
| NR4A2_Medium | chr7    | 30905379  | 30905779  | Promoter (5-6kb)  | 7       | 30911694  | 30925517  | -5915         | ENSG00000240583 | AQP1         |
| NR4A2_Medium | chr7    | 30913211  | 30913611  | Promoter (<=1kb)  | 7       | 30913291  | 30923662  | 0             | ENSG00000240583 | AQP1         |
| NR4A2_Medium | chr7    | 30979986  | 30980386  | Promoter (3-4kb)  | 7       | 30976429  | 30979531  | 3557          | ENSG00000106128 | GHRHR        |
| NR4A2_Medium | chr7    | 31059927  | 31060327  | Promoter (2-3kb)  | 7       | 31063194  | 31106709  | -2867         | ENSG00000078549 | ADCYAP1R1    |
| NR4A2_Medium | chr7    | 31648890  | 31649290  | Promoter (2-3kb)  | 7       | 31651982  | 31656502  | -2692         | ENSG00000180347 | ITPRID1      |
| NR4A2_Medium | chr7    | 32070456  | 32070856  | Promoter (<=1kb)  | 7       | 31790200  | 32070862  | 6             | ENSG00000154678 | PDE1C        |
| NR4A2_Medium | chr7    | 32545685  | 32546085  | Promoter (2-3kb)  | 7       | 32543255  | 32588711  | 2430          | ENSG00000105778 | AVL9         |
| NR4A2_Medium | chr7    | 33527430  | 33527830  | Promoter (5-6kb)  | 7       | 3353      |           |               |                 |              |



| Condition    | peakChr | peakStart | peakEnd   | annotation        | geneChr | geneStart | geneEnd   | distanceToTSS | geneID          | geneSymbol   |
|--------------|---------|-----------|-----------|-------------------|---------|-----------|-----------|---------------|-----------------|--------------|
| NR4A2_Medium | chr7    | 40082130  | 40082530  | Promoter (3-4kb)  | 7       | 40078414  | 40095462  | 3716          | ENSG00000065883 | CDK13        |
| NR4A2_Medium | chr7    | 42705645  | 42706045  | Promoter (<=1kb)  | 7       | 42661716  | 42706447  | 402           | ENSG00000238284 | LINC01448    |
| NR4A2_Medium | chr7    | 43247811  | 43248211  | Promoter (<=1kb)  | 7       | 43249137  | 43311993  | -926          | ENSG00000002746 | HECW1        |
| NR4A2_Medium | chr7    | 44066533  | 44066933  | Promoter (<=1kb)  | 7       | 44062727  | 44065567  | -966          | ENSG00000164708 | PGAM2        |
| NR4A2_Medium | chr7    | 44088940  | 44089340  | Promoter (6-7kb)  | 7       | 44079733  | 44082530  | -6410         | ENSG00000122678 | POLM         |
| NR4A2_Medium | chr7    | 44205661  | 44206061  | Promoter (1-2kb)  | 7       | 44207333  | 44208580  | -1272         | ENSG00000106636 | YKT6         |
| NR4A2_Medium | chr7    | 44539797  | 44540197  | Promoter (1-2kb)  | 7       | 44512535  | 44541315  | 1118          | ENSG00000015520 | NPC1L1       |
| NR4A2_Medium | chr7    | 44575652  | 44576052  | Promoter (<=1kb)  | 7       | 44565805  | 44575051  | -601          | ENSG00000136271 | DDX56        |
| NR4A2_Medium | chr7    | 45645777  | 45646177  | Promoter (2-3kb)  | 7       | 45648709  | 45680642  | -2532         | ENSG00000164742 | ADCY1        |
| NR4A2_Medium | chr7    | 45657699  | 45658099  | Promoter (8-9kb)  | 7       | 45648709  | 45680642  | 8990          | ENSG00000164742 | ADCY1        |
| NR4A2_Medium | chr7    | 45888433  | 45888833  | Promoter (<=1kb)  | 7       | 45888488  | 45893660  | 0             | ENSG00000146678 | IGFBP1       |
| NR4A2_Medium | chr7    | 46700016  | 46700416  | Promoter (2-3kb)  | 7       | 46687879  | 46697122  | -2894         | ENSG00000233539 | LOC730338    |
| NR4A2_Medium | chr7    | 47832147  | 47832547  | Promoter (4-5kb)  | 7       | 47809117  | 47827466  | -4681         | ENSG00000158683 | PKD1L1       |
| NR4A2_Medium | chr7    | 47952420  | 47952820  | Promoter (3-4kb)  | 7       | 47774652  | 47948491  | -3929         | ENSG00000158683 | PKD1L1       |
| NR4A2_Medium | chr7    | 47989344  | 47989744  | Promoter (<=1kb)  | 7       | 47987148  | 47988963  | -381          | ENSG00000164744 | SUN3         |
| NR4A2_Medium | chr7    | 50335342  | 50335742  | Promoter (7-8kb)  | 7       | 50327649  | 50400009  | 7693          | ENSG00000185811 | IKZF1        |
| NR4A2_Medium | chr7    | 50489711  | 50490111  | Promoter (9-10kb) | 7       | 50458570  | 50479963  | -9748         | ENSG00000132437 | DDC          |
| NR4A2_Medium | chr7    | 54545500  | 54545996  | Promoter (<=1kb)  | 7       | 54546161  | 54569489  | -165          | ENSG00000170419 | VSTM2A       |
| NR4A2_Medium | chr7    | 55864280  | 55864680  | Promoter (1-2kb)  | 7       | 55844537  | 55862755  | -1525         | ENSG00000154997 | SEPTIN14     |
| NR4A2_Medium | chr7    | 56804144  | 56804544  | Promoter (7-8kb)  | 7       | 56811799  | 56812446  | 7902          | NA              | LOC401357    |
| NR4A2_Medium | chr7    | 56817964  | 56818364  | Promoter (5-6kb)  | 7       | 56811799  | 56812446  | -5518         | NA              | LOC401357    |
| NR4A2_Medium | chr7    | 64785439  | 64785839  | Promoter (8-9kb)  | 7       | 64794388  | 64832202  | -8549         | ENSG00000197008 | ZNF138       |
| NR4A2_Medium | chr7    | 65014012  | 65014412  | Promoter (7-8kb)  | 7       | 65003669  | 65006743  | -7269         | ENSG00000213462 | ERV3-1       |
| NR4A2_Medium | chr7    | 65030247  | 65030647  | Promoter (7-8kb)  | 7       | 65038354  | 65074713  | -7707         | ENSG00000234585 | CCT6P3       |
| NR4A2_Medium | chr7    | 66597448  | 66597848  | Promoter (5-6kb)  | 7       | 66553485  | 66592397  | -5051         | ENSG00000229180 | GS1-124K5.11 |
| NR4A2_Medium | chr7    | 66621118  | 66621724  | Promoter (7-8kb)  | 7       | 66628767  | 66644015  | -7043         | ENSG00000243335 | KCTD7        |
| NR4A2_Medium | chr7    | 66744690  | 66745090  | Promoter (3-4kb)  | 7       | 66740733  | 66811464  | 3957          | ENSG00000154710 | RABGEF1      |
| NR4A2_Medium | chr7    | 66932278  | 66932678  | Promoter (1-2kb)  | 7       | 66930624  | 66945098  | 1654          | ENSG00000106609 | TMEM248      |
| NR4A2_Medium | chr7    | 69826521  | 69826921  | Promoter (1-2kb)  | 7       | 69824571  | 70290554  | 1950          | ENSG00000158321 | AUTS2        |
| NR4A2_Medium | chr7    | 70795342  | 70795742  | Promoter (8-9kb)  | 7       | 70786921  | 70790013  | 8421          | ENSG00000158321 | AUTS2        |
| NR4A2_Medium | chr7    | 71125947  | 71126347  | Promoter (5-6kb)  | 7       | 71132144  | 71713599  | -5797         | ENSG00000185274 | GALNT17      |
| NR4A2_Medium | chr7    | 71317571  | 71317971  | Promoter (9-10kb) | 7       | 71307672  | 71307770  | -9801         | ENSG00000265878 | MIR3914-1    |
| NR4A2_Medium | chr7    | 71341246  | 71341646  | Promoter (5-6kb)  | 7       | 71335549  | 71713598  | 5697          | ENSG00000185274 | GALNT17      |
| NR4A2_Medium | chr7    | 72437649  | 72438049  | Promoter (9-10kb) | 7       | 71779491  | 72447061  | 9012          | ENSG00000183166 | CALN1        |
| NR4A2_Medium | chr7    | 72447744  | 72448251  | Promoter (<=1kb)  | 7       | 71787775  | 72447151  | -593          | ENSG00000183166 | CALN1        |
| NR4A2_Medium | chr7    | 72822998  | 72823398  | Promoter (4-5kb)  | 7       | 72558744  | 72828174  | 4776          | ENSG00000277149 | TYW1B        |
| NR4A2_Medium | chr7    | 73553798  | 73554198  | Promoter (2-3kb)  | 7       | 73539716  | 73557112  | 2914          | ENSG00000106635 | BCL7B        |
| NR4A2_Medium | chr7    | 73606601  | 73607001  | Promoter (<=1kb)  | 7       | 73596710  | 73606824  | 0             | ENSG00000009950 | MLXIPL       |
| NR4A2_Medium | chr7    | 73621599  | 73621999  | Promoter (2-3kb)  | 7       | 73593194  | 73624492  | 2493          | ENSG00000009950 | MLXIPL       |
| NR4A2_Medium | chr7    | 73730013  | 73730413  | Promoter (4-5kb)  | 7       | 73735038  | 73736158  | -4625         | NA              | ABHD11-AS1   |
| NR4A2_Medium | chr7    | 73773817  | 73774217  | Promoter (3-4kb)  | 7       | 73768997  | 73770270  | -3547         | ENSG00000165215 | CLDN3        |
| NR4A2_Medium | chr7    | 73866560  | 73866960  | Promoter (5-6kb)  | 7       | 73861172  | 73865890  | 5388          | ENSG00000175877 | TMEM270      |
| NR4A2_Medium | chr7    | 74247366  | 74247766  | Promoter (4-5kb)  | 7       | 74232104  | 74243246  | -4120         | ENSG00000049541 | RFC2         |
| NR4A2_Medium | chr7    | 74549696  | 74550096  | Promoter (3-4kb)  | 7       | 74545762  | 74601106  | 3934          | ENSG00000006704 | GTF2IRD1     |
| NR4A2_Medium | chr7    | 75065654  | 75066054  | Promoter (<=1kb)  | 7       | 75042974  | 75064728  | -926          | ENSG00000274523 | RCC1L        |
| NR4A2_Medium | chr7    | 75615780  | 75616180  | Promoter (3-4kb)  | 7       | 75582092  | 75611843  | -3937         | ENSG00000127946 | HIP1         |
| NR4A2_Medium | chr7    | 75820624  | 75821024  | Promoter (2-3kb)  | 7       | 75811665  | 75823356  | 2332          | ENSG00000106178 | CCL24        |
| NR4A2_Medium | chr7    | 76111638  | 76112038  | Promoter (2-3kb)  | 7       | 76090431  | 76108779  | -2859         | NA              | GTF2IP7      |
| NR4A2_Medium | chr7    | 76243369  | 76243769  | Promoter (8-9kb)  | 7       | 76234982  | 76260034  | 8387          | ENSG00000177679 | SRRM3        |
| NR4A2_Medium | chr7    | 77424015  | 77424415  | Promoter (7-8kb)  | 7       | 77416673  | 77425444  | 7342          | NA              | LOC101927243 |
| NR4A2_Medium | chr7    | 82450958  | 82451358  | Promoter (7-8kb)  | 7       | 81946444  | 82443777  | -7181         | ENSG00000153956 | CACNA2D1     |
| NR4A2_Medium | chr7    | 84535000  | 84535400  | Promoter (2-3kb)  | 7       | 84532476  | 84574843  | 2524          | ENSG00000235139 | LOC101927378 |
| NR4A2_Medium | chr7    | 86653314  | 86653714  | Promoter (8-9kb)  | 7       | 86644845  | 86765406  | 8469          | ENSG00000198822 | GRM3         |
| NR4A2_Medium | chr7    | 87190054  | 87190454  | Promoter (1-2kb)  | 7       | 87188093  | 87193493  | 1961          | ENSG00000135164 | DMTF1        |
| NR4A2_Medium | chr7    | 87209401  | 87209801  | Promoter (6-7kb)  | 7       | 87197718  | 87203043  | -6358         | ENSG00000135185 | TMEM243      |
| NR4A2_Medium | chr7    | 87705071  | 87705471  | Promoter (3-4kb)  | 7       | 87709250  | 87770657  | -3779         | ENSG00000105784 | RUNDC3B      |
| NR4A2_Medium | chr7    | 87720221  | 87720621  | Promoter (6-7kb)  | 7       | 87503863  | 87713323  | -6898         | ENSG00000085563 | ABCB1        |
| NR4A2_Medium | chr7    | 88182241  | 88182641  | Promoter (<=1kb)  | 7       | 88182005  | 88186422  | 236           | ENSG00000008277 | ADAM22       |
| NR4A2_Medium | chr7    | 90250801  | 90251201  | Promoter (5-6kb)  | 7       | 90245425  | 90273994  | 5376          | ENSG00000105792 | CFAP69       |
| NR4A2_Medium | chr7    | 90331042  | 90331442  | Promoter (3-4kb)  | 7       | 90335223  | 90344094  | -3781         | ENSG00000105793 | LOC101927446 |
| NR4A2_Medium | chr7    | 90714333  | 90714733  | Promoter (4-5kb)  | 7       | 90709862  | 90955793  | 4471          | ENSG00000058091 | CDK14        |
| NR4A2_Medium | chr7    | 92078116  | 92078516  | Promoter (5-6kb)  | 7       | 92083576  | 92090641  | -5060         | ENSG00000127914 | AKAP9        |
| NR4A2_Medium | chr7    | 92107807  | 92108207  | Promoter (2-3kb)  | 7       | 92105677  | 92107929  | 2130          | ENSG00000127914 | AKAP9        |
| NR4A2_Medium | chr7    | 93493961  | 93494361  | Promoter (6-7kb)  | 7       | 93426310  | 93487013  | -6948         | ENSG00000004948 | CALCR        |
| NR4A2_Medium | chr7    | 94558626  | 94559026  | Promoter (4-5kb)  | 7       | 94553852  | 94556966  | 4774          | ENSG00000127995 | CASD1        |
| NR4A2_Medium | chr7    | 96328129  | 96328529  | Promoter (5-6kb)  | 7       | 96120221  | 96322147  | -5982         | ENSG00000004864 | SLC25A13     |
| NR4A2_Medium | chr7    | 96492333  | 96492733  | Promoter (3-4kb)  | 7       | 96481626  | 96496342  | 3609          | ENSG00000127922 | SEM1         |
| NR4A2_Medium | chr7    | 97004392  | 97004792  | Promoter (<=1kb)  | 7       | 96965551  | 97004317  | -75           | NA              | DLX6-AS1     |
| NR4A2_Medium | chr7    | 97144352  | 97144752  | Promoter (1-2kb)  | 7       | 97142681  | 97181647  | 1671          | ENSG00000196636 | SDHAF3       |
| NR4A2_Medium | chr7    | 98304616  | 98305016  | Promoter (1-2kb)  | 7       | 98304196  | 98306957  | 1941          | ENSG00000006453 | BAIAP2L1     |
| NR4A2_Medium | chr7    | 99237888  | 99238288  | Promoter (<=1kb)  | 7       | 99238829  | 99306809  | -541          | NA              | MYH16        |
| NR4A2_Medium | chr7    | 99335718  | 99336118  | Promoter (9-10kb) | 7       | 99325927  | 99366226  | 9791          | ENSG00000241685 | ARPC1A       |
| NR4A2_Medium | chr7    | 99355602  | 99356002  | Promoter (1-2kb)  | 7       | 99353935  | 99360242  | 1667          | ENSG00000241685 | ARPC1A       |
| NR4A2_Medium | chr7    | 99437084  | 99437484  | Promoter (1-2kb)  | 7       | 99434810  | 99438647  | 1163          | ENSG00000106246 | PTCD1        |
| NR4A2_Medium | chr7    | 99821091  | 99821491  | Promoter (6-7kb)  | 7       | 99828013  | 99839420  | -6522         | ENSG00000021461 | CYP3A43      |
| NR4A2_Medium | chr7    | 100011738 | 100012138 | Promoter (3-4kb)  | 7       | 100015572 | 100041688 | -3434         | ENSG00000106261 | ZKSCAN1      |
| NR4A2_Medium | chr7    | 100062613 | 100063013 | Promoter (5-6kb)  | 7       | 100056911 | 100064255 | 5702          | ENSG00000166529 | ZSCAN21      |
| NR4A2_Medium | chr7    | 100224110 | 100224510 | Promoter (<=1kb)  | 7       | 100202241 | 100223943 | -167          | ENSG00000239521 | CASTOR3      |
| NR4A2_Medium | chr7    | 100599182 | 100599582 | Promoter (2-3kb)  | 7       | 100600337 | 100601857 | 2275          | ENSG00000224729 | PCOLCE-AS1   |
| NR4A2_Medium | chr7    | 100617091 | 100617491 | Promoter (4-5kb)  | 7       | 100612815 | 100613789 | 4276          | ENSG00000106330 | MOSPD3       |
| NR4A2_Medium | chr7    | 100958487 | 100958908 | Promoter (<=1kb)  | 7       | 100957965 | 100967890 | 522           | ENSG00000169894 | MUC3A        |
| NR4A2_Medium | chr7    | 101085135 | 101085535 | Promoter (<=1kb)  | 7       | 101085481 | 101097967 | 0             | ENSG00000169871 | TRIM56       |
| NR4A2_Medium | chr7    | 101090277 | 101090677 | Promoter (3-4kb)  | 7       | 101086785 | 101087508 | 3492          | ENSG00000169871 | TRIM56       |
| NR4A2_Medium | chr7    | 101170211 | 101170611 | Promoter (4-5kb)  | 7       | 101162509 | 101165569 | -4642         | ENSG00000128564 | VGFB         |
| NR4A2_Medium | chr7    | 101554056 | 101554456 | Promoter (<=1kb)  | 7       | 101553203 | 101557633 | 853           | ENSG00000160963 | COL26A1      |
| NR4A2_Medium | chr7    | 101556411 | 101556811 | Promoter (3-4kb)  | 7       | 101553203 | 101557633 | 3208          | ENSG00000160963 | COL26A1      |
| NR4A2_Medium | chr7    | 102109192 | 102109592 | Promoter (4-5kb)  | 7       | 102104437 | 102115670 | 4755          | ENSG00000257923 | CUX1         |
| NR4A2_Medium | chr7    | 103046565 | 103046965 | Promoter (3-4kb)  | 7       | 102813233 | 103050059 | 3094          | ENSG00000161040 | FBXL13       |
| NR4A2_Medium | chr7    | 105104402 | 105104802 | Promoter (2-3kb)  | 7       | 105101471 | 105102649 | 2931          | ENSG00000005483 | KMT2E        |
| NR4A2_Medium | chr7    | 105382843 | 105383243 | Promoter (5-6kb)  | 7       | 105167377 | 105388894 | 5651          | ENSG00000135250 | SRPK2        |
| NR4A2_Medium | chr7    | 105543686 | 105544086 | Promoter (1-2kb)  | 7       | 105542240 | 105546996 | 1446          | ENSG00000135249 | RINT1        |
| NR4A2_Medium | chr7    | 105559280 | 105559680 | Promoter (9-10kb) | 7       | 105550055 | 105555363 | 9225          | ENSG00000135249 | RINT1        |
| NR4A2_Medium | chr7    | 105685058 | 105685458 | Promoter (5-6kb)  | 7       | 105638369 | 105679206 | -5852         | ENSG00000146776 | ATXN7L1      |
| NR4A2_Medium | chr7    | 106018967 | 106019367 | Promoter (3-4kb)  | 7       | 106015124 | 106022448 | 3843          | ENSG00000128536 | CDHR3        |
| NR4A2_Medium | chr7    | 107770017 | 107770417 | Promoter (6-7kb)  | 7       | 107776015 | 107776752 | 6335          | ENSG00000091138 |              |

| Condition    | peakChr | peakStart | peakEnd   | annotation        | geneChr | geneStart | geneEnd   | distanceToTSS | geneID          | geneSymbol   |
|--------------|---------|-----------|-----------|-------------------|---------|-----------|-----------|---------------|-----------------|--------------|
| NR4A2_Medium | chr7    | 129850469 | 129850869 | Promoter (8-9kb)  | 7       | 129857079 | 129858969 | 8100          | ENSG00000186591 | UBE2H        |
| NR4A2_Medium | chr7    | 130035807 | 130036207 | Promoter (3-4kb)  | 7       | 130023564 | 130039626 | 3419          | ENSG00000091732 | ZC3HC1       |
| NR4A2_Medium | chr7    | 130075990 | 130076390 | Promoter (5-6kb)  | 7       | 130070772 | 130124534 | 5218          | ENSG00000128607 | KLHDC10      |
| NR4A2_Medium | chr7    | 130361147 | 130361547 | Promoter (1-2kb)  | 7       | 130363441 | 130368730 | -1894         | ENSG00000158525 | CPA5         |
| NR4A2_Medium | chr7    | 130530038 | 130530438 | Promoter (8-9kb)  | 7       | 130538954 | 130546900 | -8516         | NA              | COPG2IT1     |
| NR4A2_Medium | chr7    | 130541311 | 130541711 | Promoter (2-3kb)  | 7       | 130538954 | 130546900 | 2357          | NA              | COPG2IT1     |
| NR4A2_Medium | chr7    | 131498461 | 131498861 | Promoter (7-8kb)  | 7       | 131503950 | 131506105 | 7244          | ENSG00000128567 | PODXL        |
| NR4A2_Medium | chr7    | 131910795 | 131911195 | Promoter (<=1kb)  | 7       | 131910220 | 131948953 | 575           | ENSG00000224865 | LOC101928782 |
| NR4A2_Medium | chr7    | 132151331 | 132151731 | Promoter (5-6kb)  | 7       | 132140604 | 132145507 | -5824         | ENSG00000221866 | PLXNA4       |
| NR4A2_Medium | chr7    | 132568190 | 132568590 | Promoter (7-8kb)  | 7       | 132383488 | 132576470 | 7880          | ENSG00000221866 | PLXNA4       |
| NR4A2_Medium | chr7    | 133899530 | 133899930 | Promoter (4-5kb)  | 7       | 133895063 | 133937956 | 4467          | ENSG00000131558 | EXOC4        |
| NR4A2_Medium | chr7    | 135715001 | 135715401 | Promoter (9-10kb) | 7       | 135699364 | 135705807 | -9194         | ENSG00000164707 | SLC13A4      |
| NR4A2_Medium | chr7    | 135977363 | 135977763 | Promoter (<=1kb)  | 7       | 135926760 | 135977359 | -4            | ENSG00000105887 | MTPN         |
| NR4A2_Medium | chr7    | 137400892 | 137401292 | Promoter (4-5kb)  | 7       | 137391085 | 137395973 | -4919         | ENSG00000157680 | DGKI         |
| NR4A2_Medium | chr7    | 138078873 | 138079273 | Promoter (2-3kb)  | 7       | 138076518 | 138097944 | 2355          | ENSG00000122787 | AKR1D1       |
| NR4A2_Medium | chr7    | 138743992 | 138744392 | Promoter (3-4kb)  | 7       | 138734188 | 138747675 | 3283          | ENSG00000105929 | ATP6V0A4     |
| NR4A2_Medium | chr7    | 139069539 | 139069939 | Promoter (9-10kb) | 7       | 139060338 | 139079267 | 9328          | ENSG00000105939 | ZC3HAV1      |
| NR4A2_Medium | chr7    | 139540514 | 139540914 | Promoter (1-2kb)  | 7       | 139539153 | 139544984 | 1361          | ENSG00000236279 | CLEC2L       |
| NR4A2_Medium | chr7    | 140065587 | 140065987 | Promoter (1-2kb)  | 7       | 140023744 | 140063721 | -1866         | ENSG00000059378 | PARP12       |
| NR4A2_Medium | chr7    | 140749241 | 140749641 | Promoter (7-8kb)  | 7       | 140734487 | 140741717 | -7524         | ENSG00000157764 | BRAF         |
| NR4A2_Medium | chr7    | 144748444 | 144748844 | Promoter (8-9kb)  | 7       | 144619181 | 144739477 | -8967         | ENSG00000196511 | TPK1         |
| NR4A2_Medium | chr7    | 146775336 | 146775736 | Promoter (1-2kb)  | 7       | 146774324 | 146782250 | 1012          | ENSG00000174469 | CNTNAP2      |
| NR4A2_Medium | chr7    | 148958427 | 148958827 | Promoter (4-5kb)  | 7       | 148963315 | 148963410 | -4488         | ENSG00000252316 | RNY4         |
| NR4A2_Medium | chr7    | 149279750 | 149280150 | Promoter (1-2kb)  | 7       | 149278138 | 149293488 | 1612          | ENSG00000244560 | LOC155060    |
| NR4A2_Medium | chr7    | 149732741 | 149733141 | Promoter (2-3kb)  | 7       | 149730040 | 149730697 | 2701          | ENSG00000133619 | KRBA1        |
| NR4A2_Medium | chr7    | 149740013 | 149740413 | Promoter (9-10kb) | 7       | 149730040 | 149730697 | 9973          | ENSG00000133619 | KRBA1        |
| NR4A2_Medium | chr7    | 149810606 | 149811006 | Promoter (<=1kb)  | 7       | 149810915 | 149812635 | 0             | ENSG00000197558 | SSPOP        |
| NR4A2_Medium | chr7    | 149815593 | 149815993 | Promoter (4-5kb)  | 7       | 149810915 | 149812635 | 4678          | ENSG00000197558 | SSPOP        |
| NR4A2_Medium | chr7    | 149831302 | 149831702 | Promoter (6-7kb)  | 7       | 149838375 | 149845091 | -6673         | ENSG00000106479 | ZNF862       |
| NR4A2_Medium | chr7    | 150035784 | 150036184 | Promoter (<=1kb)  | 7       | 150035938 | 150045092 | 0             | NA              | LOC100134040 |
| NR4A2_Medium | chr7    | 150969190 | 150969590 | Promoter (8-9kb)  | 7       | 150949899 | 150978100 | 8510          | ENSG00000055118 | KCNH2        |
| NR4A2_Medium | chr7    | 150999418 | 150999818 | Promoter (2-3kb)  | 7       | 151001867 | 151002963 | -2049         | ENSG00000164867 | NOS3         |
| NR4A2_Medium | chr7    | 151014299 | 151014699 | Promoter (<=1kb)  | 7       | 151013295 | 151014304 | 0             | ENSG00000181652 | ATG9B        |
| NR4A2_Medium | chr7    | 151062392 | 151062792 | Promoter (<=1kb)  | 7       | 151062547 | 151076522 | 0             | ENSG00000164889 | SLC4A2       |
| NR4A2_Medium | chr7    | 151197641 | 151198041 | Promoter (<=1kb)  | 7       | 151194256 | 151197302 | -339          | ENSG00000278685 | IQCA1L       |
| NR4A2_Medium | chr7    | 151364119 | 151364519 | Promoter (3-4kb)  | 7       | 151360141 | 151369193 | 3978          | ENSG00000013374 | NUB1         |
| NR4A2_Medium | chr7    | 151401710 | 151402110 | Promoter (5-6kb)  | 7       | 151375909 | 151395917 | -5793         | ENSG00000187260 | WDR86        |
| NR4A2_Medium | chr7    | 151588172 | 151588572 | Promoter (6-7kb)  | 7       | 151571462 | 151595410 | 6838          | ENSG00000106617 | PRKAG2       |
| NR4A2_Medium | chr7    | 151992192 | 151992592 | Promoter (2-3kb)  | 7       | 151994939 | 152007944 | -2347         | ENSG00000106648 | GALNTL5      |
| NR4A2_Medium | chr7    | 152016107 | 152016507 | Promoter (9-10kb) | 7       | 152025674 | 152103277 | -9167         | ENSG00000178234 | GALNT11      |
| NR4A2_Medium | chr7    | 152752971 | 152753371 | Promoter (6-7kb)  | 7       | 152759749 | 152854938 | -6378         | ENSG00000133627 | ACTR3B       |
| NR4A2_Medium | chr7    | 154859313 | 154859713 | Promoter (8-9kb)  | 7       | 154867995 | 154881084 | -8282         | ENSG00000130226 | DPP6         |
| NR4A2_Medium | chr7    | 154873801 | 154874201 | Promoter (1-2kb)  | 7       | 154872624 | 154877143 | 1177          | ENSG00000130226 | DPP6         |
| NR4A2_Medium | chr7    | 154877713 | 154878113 | Promoter (5-6kb)  | 7       | 154872624 | 154877143 | 5089          | ENSG00000130226 | DPP6         |
| NR4A2_Medium | chr7    | 154974158 | 154974558 | Promoter (<=1kb)  | 7       | 154969049 | 154974623 | 65            | ENSG00000157212 | PAXIP1       |
| NR4A2_Medium | chr7    | 155389189 | 155389589 | Promoter (7-8kb)  | 7       | 155382076 | 155396356 | 7113          | NA              | LOC100286906 |
| NR4A2_Medium | chr7    | 155561858 | 155562258 | Promoter (6-7kb)  | 7       | 155502014 | 155555450 | -6408         | ENSG00000146910 | CNPY1        |
| NR4A2_Medium | chr7    | 157134885 | 157135285 | Promoter (3-4kb)  | 7       | 157138916 | 157189296 | -3631         | ENSG00000009335 | UBE3C        |
| NR4A2_Medium | chr7    | 157567595 | 157567995 | Promoter (6-7kb)  | 7       | 157574336 | 157574422 | 6427          | ENSG00000207960 | MIR153-2     |
| NR4A2_Medium | chr7    | 158205547 | 158205947 | Promoter (<=1kb)  | 7       | 158110825 | 158205277 | -270          | ENSG00000155093 | PTPRN2       |
| NR4A2_Medium | chr7    | 158531956 | 158532356 | Promoter (<=1kb)  | 7       | 158532718 | 158532813 | 457           | ENSG00000207637 | MIR595       |
| NR4A2_Medium | chr7    | 158589847 | 158590247 | Promoter (<=1kb)  | 7       | 158590629 | 158591120 | -382          | NA              | LINC01022    |
| NR4A2_Medium | chr7    | 159007595 | 159007995 | Promoter (<=1kb)  | 7       | 159008354 | 159022680 | -359          | ENSG00000231419 | LINC00689    |
| NR4A2_Medium | chr7    | 159104595 | 159104995 | Promoter (7-8kb)  | 7       | 159030455 | 159097204 | -7391         | ENSG00000106018 | VIPR2        |
| NR4A2_Medium | chr7    | 159106634 | 159107034 | Promoter (9-10kb) | 7       | 159030455 | 159097204 | -9430         | ENSG00000106018 | VIPR2        |
| NR4A2_Medium | chr8    | 502993    | 503393    | Promoter (7-8kb)  | 8       | 492630    | 495010    | -7983         | ENSG00000180190 | TDRP         |
| NR4A2_Medium | chr8    | 554687    | 555087    | Promoter (8-9kb)  | 8       | 489803    | 545781    | -8906         | ENSG00000180190 | TDRP         |
| NR4A2_Medium | chr8    | 696652    | 697052    | Promoter (9-10kb) | 8       | 673844    | 686724    | -9928         | ENSG00000104714 | ERICH1       |
| NR4A2_Medium | chr8    | 715129    | 715529    | Promoter (<=1kb)  | 8       | 673767    | 715927    | 398           | ENSG00000104714 | ERICH1       |
| NR4A2_Medium | chr8    | 3105984   | 3106384   | Promoter (<=1kb)  | 8       | 3096902   | 3107155   | 771           | ENSG00000183117 | CSMD1        |
| NR4A2_Medium | chr8    | 3524331   | 3524731   | Promoter (8-9kb)  | 8       | 3468712   | 3515359   | -8972         | ENSG00000183117 | CSMD1        |
| NR4A2_Medium | chr8    | 4993950   | 4994350   | Promoter (<=1kb)  | 8       | 2938099   | 4994701   | 351           | ENSG00000183117 | CSMD1        |
| NR4A2_Medium | chr8    | 16211324  | 16211724  | Promoter (3-4kb)  | 8       | 16175210  | 16215074  | 3350          | ENSG00000038945 | MSR1         |
| NR4A2_Medium | chr8    | 17779456  | 17779856  | Promoter (1-2kb)  | 8       | 17755438  | 17780962  | 1106          | ENSG00000129422 | MTUS1        |
| NR4A2_Medium | chr8    | 18030969  | 18031369  | Promoter (6-7kb)  | 8       | 18024951  | 18027758  | 6018          | ENSG00000078674 | PCM1         |
| NR4A2_Medium | chr8    | 18390188  | 18390588  | Promoter (<=1kb)  | 8       | 18391282  | 18401218  | -694          | ENSG00000156006 | NAT2         |
| NR4A2_Medium | chr8    | 18674831  | 18675231  | Promoter (8-9kb)  | 8       | 18530710  | 18683932  | 8701          | ENSG00000156011 | PSD3         |
| NR4A2_Medium | chr8    | 18896807  | 18897207  | Promoter (9-10kb) | 8       | 18530711  | 18887034  | -9773         | ENSG00000156011 | PSD3         |
| NR4A2_Medium | chr8    | 19532375  | 19532775  | Promoter (<=1kb)  | 8       | 19506037  | 19532020  | -355          | ENSG00000147408 | CSGALNACT1   |
| NR4A2_Medium | chr8    | 19834987  | 19835387  | Promoter (1-2kb)  | 8       | 19837053  | 19852083  | -1666         | ENSG00000104613 | INTS10       |
| NR4A2_Medium | chr8    | 19839599  | 19839999  | Promoter (2-3kb)  | 8       | 19837081  | 19851674  | 2518          | ENSG00000104613 | INTS10       |
| NR4A2_Medium | chr8    | 22447158  | 22447558  | Promoter (5-6kb)  | 8       | 22441365  | 22475667  | 5793          | ENSG00000120910 | PPP3CC       |
| NR4A2_Medium | chr8    | 22625948  | 22626348  | Promoter (<=1kb)  | 8       | 22620436  | 22626542  | 194           | ENSG00000147439 | BIN3         |
| NR4A2_Medium | chr8    | 22698870  | 22699270  | Promoter (5-6kb)  | 8       | 22687659  | 22693480  | -5390         | ENSG00000179388 | EGR3         |
| NR4A2_Medium | chr8    | 23684552  | 23684952  | Promoter (1-2kb)  | 8       | 23678697  | 23682938  | -1614         | ENSG00000167034 | NKX3-1       |
| NR4A2_Medium | chr8    | 24445162  | 24445562  | Promoter (4-5kb)  | 8       | 24441084  | 24509548  | 4078          | ENSG00000069206 | ADAM7        |
| NR4A2_Medium | chr8    | 25411071  | 25411471  | Promoter (1-2kb)  | 8       | 25409997  | 25418082  | 1074          | ENSG00000147459 | DOCK5        |
| NR4A2_Medium | chr8    | 25419319  | 25419719  | Promoter (4-5kb)  | 8       | 25419258  | 25424261  | 4542          | ENSG00000147437 | GNRH1        |
| NR4A2_Medium | chr8    | 25467784  | 25468184  | Promoter (<=1kb)  | 8       | 25468271  | 25485835  | -87           | ENSG00000184661 | CDA2         |
| NR4A2_Medium | chr8    | 27391110  | 27391510  | Promoter (5-6kb)  | 8       | 27397452  | 27459386  | -5942         | ENSG00000120899 | PTK2B        |
| NR4A2_Medium | chr8    | 28748421  | 28748821  | Promoter (4-5kb)  | 8       | 28743976  | 28751094  | 4445          | ENSG0000012232  | EXTL3        |
| NR4A2_Medium | chr8    | 28772198  | 28772598  | Promoter (1-2kb)  | 8       | 28767912  | 28771064  | -1134         | ENSG00000104299 | INTS9        |
| NR4A2_Medium | chr8    | 28805880  | 28806280  | Promoter (7-8kb)  | 8       | 28812357  | 28813700  | 7420          | ENSG00000104299 | INTS9        |
| NR4A2_Medium | chr8    | 29265116  | 29265516  | Promoter (1-2kb)  | 8       | 29145858  | 29263124  | -1992         | ENSG00000197892 | KIF13B       |
| NR4A2_Medium | chr8    | 30747090  | 30747490  | Promoter (2-3kb)  | 8       | 30744190  | 30766394  | 2900          | ENSG00000104691 | UBXN8        |
| NR4A2_Medium | chr8    | 30766046  | 30766446  | Promoter (2-3kb)  | 8       | 30763146  | 30766552  | 2900          | ENSG00000104691 | UBXN8        |
| NR4A2_Medium | chr8    | 32144383  | 32144783  | Promoter (7-8kb)  | 8       | 32136661  | 32139475  | 7722          | ENSG00000253974 | NRG1-IT1     |
| NR4A2_Medium | chr8    | 33383687  | 33384087  | Promoter (5-6kb)  | 8       | 33372079  | 33389250  | 5163          | ENSG00000172728 | FUT10        |
| NR4A2_Medium | chr8    | 34780631  | 34781031  | Promoter (2-3kb)  | 8       | 34784028  | 34865364  | -2997         | NA              | LINC01288    |
| NR4A2_Medium | chr8    | 36919836  | 36920236  | Promoter (8-9kb)  | 8       | 36928905  | 36931145  | -8669         | ENSG00000215262 | KCNU1        |
| NR4A2_Medium | chr8    | 37518251  | 37518651  | Promoter (<=1kb)  | 8       | 37516407  | 37517728  | -523          | ENSG00000253414 | LINC01605    |
| NR4A2_Medium | chr8    | 37559216  | 37559616  | Promoter (5-6kb)  | 8       | 37450763  | 37554183  | -5033         | ENSG00000253414 | LINC01605    |
| NR4A2_Medium | chr8    | 37878450  | 37878850  | Promoter (<=1kb)  | 8       | 37870387  | 37878117  | -333          | ENSG00000156675 | RAB11FIP1    |
| NR4A2_Medium | chr8    | 37902021  | 37902421  | Promoter (2-3kb)  | 8       | 37858618  | 37899497  | -2524         | ENSG00000156675 | RAB11FIP1    |
| NR4A2_Medium | chr8    | 38160514  | 3         |                   |         |           |           |               |                 |              |



| Condition    | peakChr | peakStart | peakEnd   | annotation        | geneChr | geneStart | geneEnd   | distanceToTSS | geneID          | geneSymbol   |
|--------------|---------|-----------|-----------|-------------------|---------|-----------|-----------|---------------|-----------------|--------------|
| NR4A2_Medium | chr8    | 47678684  | 47679084  | Promoter (5-6kb)  | 8       | 47673533  | 47735785  | 5151          | ENSG00000164808 | SPIDR        |
| NR4A2_Medium | chr8    | 47687768  | 47688168  | Promoter (<=1kb)  | 8       | 47688442  | 47713644  | -274          | ENSG00000164808 | SPIDR        |
| NR4A2_Medium | chr8    | 48726306  | 48726706  | Promoter (3-4kb)  | 8       | 48713634  | 48729789  | 3083          | ENSG00000034239 | EFCAB1       |
| NR4A2_Medium | chr8    | 52707155  | 52707555  | Promoter (6-7kb)  | 8       | 52622459  | 52714423  | 6868          | ENSG00000023287 | RB1CC1       |
| NR4A2_Medium | chr8    | 52933652  | 52934052  | Promoter (4-5kb)  | 8       | 52938431  | 52941117  | -4379         | ENSG00000288611 | NPBWR1       |
| NR4A2_Medium | chr8    | 53261173  | 53261573  | Promoter (9-10kb) | 8       | 53225716  | 53251697  | -9476         | ENSG00000082556 | OPRK1        |
| NR4A2_Medium | chr8    | 56217317  | 56217717  | Promoter (2-3kb)  | 8       | 56214445  | 56217590  | 2872          | ENSG00000170791 | CHCHD7       |
| NR4A2_Medium | chr8    | 56395586  | 56395986  | Promoter (<=1kb)  | 8       | 56373064  | 56395365  | -221          | ENSG00000253542 | SDR16C6P     |
| NR4A2_Medium | chr8    | 58021986  | 58022386  | Promoter (9-10kb) | 8       | 58031616  | 58146040  | -9230         | ENSG00000169122 | FAM110B      |
| NR4A2_Medium | chr8    | 58505977  | 58506377  | Promoter (5-6kb)  | 8       | 58490178  | 58500163  | -5814         | ENSG00000167910 | CYP7A1       |
| NR4A2_Medium | chr8    | 65712637  | 65713037  | Promoter (4-5kb)  | 8       | 65707890  | 65720596  | 4747          | ENSG00000066855 | MTFR1        |
| NR4A2_Medium | chr8    | 66963690  | 66964090  | Promoter (1-2kb)  | 8       | 66946501  | 66962591  | -1099         | ENSG00000261787 | TCF24        |
| NR4A2_Medium | chr8    | 66976837  | 66977237  | Promoter (4-5kb)  | 8       | 66964099  | 66982134  | 4897          | ENSG00000178125 | PPP1R42      |
| NR4A2_Medium | chr8    | 67159296  | 67159696  | Promoter (1-2kb)  | 8       | 67157627  | 67195518  | 1669          | ENSG00000104218 | CSPP1        |
| NR4A2_Medium | chr8    | 67265086  | 67265486  | Promoter (6-7kb)  | 8       | 67173511  | 67271708  | 6222          | ENSG00000066777 | ARFGF1       |
| NR4A2_Medium | chr8    | 67270774  | 67271174  | Promoter (<=1kb)  | 8       | 67173511  | 67271708  | 534           | ENSG00000066777 | ARFGF1       |
| NR4A2_Medium | chr8    | 67333524  | 67333924  | Promoter (9-10kb) | 8       | 67299314  | 67343677  | 9753          | ENSG00000066777 | ARFGF1       |
| NR4A2_Medium | chr8    | 68991451  | 68991851  | Promoter (9-10kb) | 8       | 68880139  | 69001468  | 9617          | ENSG00000253658 | LINC01592    |
| NR4A2_Medium | chr8    | 69093927  | 69094327  | Promoter (9-10kb) | 8       | 68911803  | 69104190  | 9863          | ENSG00000253658 | LINC01592    |
| NR4A2_Medium | chr8    | 74555391  | 74555791  | Promoter (6-7kb)  | 8       | 74548550  | 74548609  | -6782         | ENSG00000283505 | MIR5681B     |
| NR4A2_Medium | chr8    | 74602803  | 74603203  | Promoter (2-3kb)  | 8       | 74599866  | 74758352  | 2937          | ENSG00000254349 | MIR2052HG    |
| NR4A2_Medium | chr8    | 78567310  | 78567710  | Promoter (8-9kb)  | 8       | 78533892  | 78558503  | -8807         | ENSG00000254266 | PKIA-AS1     |
| NR4A2_Medium | chr8    | 78749423  | 78749823  | Promoter (9-10kb) | 8       | 78717900  | 78740082  | -9341         | ENSG00000104432 | IL7          |
| NR4A2_Medium | chr8    | 79811063  | 79811463  | Promoter (9-10kb) | 8       | 79819060  | 79821309  | 9846          | ENSG00000249328 | LOC101927040 |
| NR4A2_Medium | chr8    | 80151725  | 80152125  | Promoter (6-7kb)  | 8       | 80064475  | 80158887  | 6762          | ENSG00000076554 | TPD52        |
| NR4A2_Medium | chr8    | 84704449  | 84704849  | Promoter (1-2kb)  | 8       | 84705927  | 84921841  | -1078         | ENSG00000184672 | RALYL        |
| NR4A2_Medium | chr8    | 85714523  | 85714923  | Promoter (<=1kb)  | 8       | 85714922  | 85715833  | 0             | ENSG00000277422 | REXO1L2P     |
| NR4A2_Medium | chr8    | 86332993  | 86333393  | Promoter (9-10kb) | 8       | 86342547  | 86468503  | -9154         | ENSG00000123124 | WWP1         |
| NR4A2_Medium | chr8    | 89786224  | 89786624  | Promoter (6-7kb)  | 8       | 89780088  | 89780778  | 6136          | ENSG00000104312 | RIPK2        |
| NR4A2_Medium | chr8    | 90096458  | 90096858  | Promoter (<=1kb)  | 8       | 90063299  | 90095475  | -983          | ENSG00000104327 | CALB1        |
| NR4A2_Medium | chr8    | 90211164  | 90211564  | Promoter (9-10kb) | 8       | 90221341  | 90388594  | -9777         | ENSG00000253394 | LINC00534    |
| NR4A2_Medium | chr8    | 90599117  | 90599517  | Promoter (6-7kb)  | 8       | 90592804  | 90606065  | 6548          | ENSG00000253799 | LINC01030    |
| NR4A2_Medium | chr8    | 91095143  | 91095543  | Promoter (7-8kb)  | 8       | 91102619  | 91219236  | -7076         | ENSG00000214954 | LRRRC69      |
| NR4A2_Medium | chr8    | 92963474  | 92963874  | Promoter (1-2kb)  | 8       | 92953415  | 92965488  | 1614          | ENSG00000205133 | TRIQQ        |
| NR4A2_Medium | chr8    | 93009514  | 93009914  | Promoter (7-8kb)  | 8       | 92885320  | 93017673  | 7759          | ENSG00000205133 | TRIQQ        |
| NR4A2_Medium | chr8    | 94223523  | 94223923  | Promoter (6-7kb)  | 8       | 94128240  | 94217303  | -6220         | ENSG00000079112 | CDH17        |
| NR4A2_Medium | chr8    | 94729664  | 94730064  | Promoter (3-4kb)  | 8       | 94726402  | 94745084  | 3262          | ENSG00000156162 | DPY19L4      |
| NR4A2_Medium | chr8    | 97883870  | 97884270  | Promoter (3-4kb)  | 8       | 97887834  | 97931106  | -3564         | ENSG00000132561 | MATN2        |
| NR4A2_Medium | chr8    | 98045681  | 98046081  | Promoter (<=1kb)  | 8       | 98042645  | 98045550  | -131          | ENSG00000156482 | RPL30        |
| NR4A2_Medium | chr8    | 99006800  | 99007200  | Promoter (6-7kb)  | 8       | 99013266  | 99209787  | -6066         | ENSG00000132549 | VPS13B       |
| NR4A2_Medium | chr8    | 99998219  | 99998619  | Promoter (5-6kb)  | 8       | 100004583 | 100004649 | -5964         | ENSG00000212414 | SNORD77B     |
| NR4A2_Medium | chr8    | 100163568 | 100163968 | Promoter (5-6kb)  | 8       | 100158428 | 100241902 | 5140          | ENSG00000104450 | SPAG1        |
| NR4A2_Medium | chr8    | 102029673 | 102030073 | Promoter (9-10kb) | 8       | 101719408 | 102020406 | -9267         | ENSG00000104490 | NCALD        |
| NR4A2_Medium | chr8    | 105924698 | 105925098 | Promoter (2-3kb)  | 8       | 105785171 | 105927718 | 2620          | NA              | ZFPM2-AS1    |
| NR4A2_Medium | chr8    | 108069923 | 108070323 | Promoter (2-3kb)  | 8       | 107901102 | 108073089 | 2766          | ENSG00000147655 | RSPO2        |
| NR4A2_Medium | chr8    | 108243453 | 108243853 | Promoter (<=1kb)  | 8       | 108201865 | 108242833 | -620          | ENSG00000104408 | EIF3E        |
| NR4A2_Medium | chr8    | 109608559 | 109608959 | Promoter (<=1kb)  | 8       | 109574653 | 109608075 | -484          | ENSG00000147642 | SYBU         |
| NR4A2_Medium | chr8    | 109645015 | 109645415 | Promoter (<=1kb)  | 8       | 109586135 | 109645389 | 0             | ENSG00000147642 | SYBU         |
| NR4A2_Medium | chr8    | 111239810 | 111240210 | Promoter (3-4kb)  | 8       | 111183292 | 111236203 | -3607         | ENSG00000253103 | LINC01609    |
| NR4A2_Medium | chr8    | 111241159 | 111241559 | Promoter (4-5kb)  | 8       | 111183292 | 111236203 | -4956         | ENSG00000253103 | LINC01609    |
| NR4A2_Medium | chr8    | 115814426 | 115814826 | Promoter (4-5kb)  | 8       | 115619913 | 115809673 | -4753         | ENSG00000104447 | TRPS1        |
| NR4A2_Medium | chr8    | 119645893 | 119646293 | Promoter (7-8kb)  | 8       | 119557521 | 119638839 | -7054         | ENSG00000136960 | ENPP2        |
| NR4A2_Medium | chr8    | 119666437 | 119666837 | Promoter (6-7kb)  | 8       | 119557086 | 119673453 | 6616          | ENSG00000136960 | ENPP2        |
| NR4A2_Medium | chr8    | 119792716 | 119793116 | Promoter (<=1kb)  | 8       | 119789679 | 119791874 | -842          | ENSG00000064313 | TAF2         |
| NR4A2_Medium | chr8    | 119969342 | 119969742 | Promoter (<=1kb)  | 8       | 119969788 | 120049591 | -46           | ENSG00000155792 | DEPTOR       |
| NR4A2_Medium | chr8    | 122662400 | 122662800 | Promoter (8-9kb)  | 8       | 122667539 | 122671390 | 8590          | NA              | LINC01151    |
| NR4A2_Medium | chr8    | 122739840 | 122740240 | Promoter (6-7kb)  | 8       | 122620716 | 122733804 | -6036         | NA              | LINC01151    |
| NR4A2_Medium | chr8    | 123150791 | 123151191 | Promoter (6-7kb)  | 8       | 123157729 | 123165173 | -6538         | ENSG00000156787 | TBC1D31      |
| NR4A2_Medium | chr8    | 123180400 | 123180800 | Promoter (1-2kb)  | 8       | 123179114 | 123180719 | 1286          | ENSG00000147689 | FAM83A       |
| NR4A2_Medium | chr8    | 123659115 | 123659515 | Promoter (6-7kb)  | 8       | 123645527 | 123652950 | -6165         | ENSG00000175946 | KLHL38       |
| NR4A2_Medium | chr8    | 124855867 | 124856267 | Promoter (6-7kb)  | 8       | 124849044 | 124951177 | 6823          | ENSG00000249816 | LINC00964    |
| NR4A2_Medium | chr8    | 125421694 | 125422094 | Promoter (8-9kb)  | 8       | 125430358 | 125438403 | -8264         | ENSG00000173334 | TRIB1        |
| NR4A2_Medium | chr8    | 127946632 | 127947032 | Promoter (1-2kb)  | 8       | 127946880 | 127948345 | 1313          | ENSG00000280055 | TMEM75       |
| NR4A2_Medium | chr8    | 127955449 | 127955849 | Promoter (4-5kb)  | 8       | 127960633 | 127960695 | -4784         | ENSG00000221771 | MIR1205      |
| NR4A2_Medium | chr8    | 127960708 | 127961108 | Promoter (<=1kb)  | 8       | 127960633 | 127960695 | 75            | ENSG00000221771 | MIR1205      |
| NR4A2_Medium | chr8    | 127973672 | 127974072 | Promoter (9-10kb) | 8       | 127983878 | 128101256 | -9806         | ENSG00000249859 | PVT1         |
| NR4A2_Medium | chr8    | 129859085 | 129859485 | Promoter (2-3kb)  | 8       | 129850554 | 129862326 | 2841          | ENSG00000153310 | CYRIB        |
| NR4A2_Medium | chr8    | 129864501 | 129864901 | Promoter (2-3kb)  | 8       | 129850554 | 129862326 | -2175         | ENSG00000153310 | CYRIB        |
| NR4A2_Medium | chr8    | 129930951 | 129931351 | Promoter (8-9kb)  | 8       | 129841484 | 129939694 | 8343          | ENSG00000153310 | CYRIB        |
| NR4A2_Medium | chr8    | 131929078 | 131929478 | Promoter (8-9kb)  | 8       | 131938225 | 132010895 | -8747         | ENSG00000132294 | EFR3A        |
| NR4A2_Medium | chr8    | 132058934 | 132059334 | Promoter (<=1kb)  | 8       | 132024216 | 132059382 | 48            | ENSG00000253117 | OC90         |
| NR4A2_Medium | chr8    | 132454676 | 132455076 | Promoter (7-8kb)  | 8       | 132128980 | 132447262 | -7414         | ENSG00000184156 | KCNQ3        |
| NR4A2_Medium | chr8    | 132630601 | 132631001 | Promoter (5-6kb)  | 8       | 132572199 | 132625387 | -5214         | ENSG00000129295 | LRRRC6       |
| NR4A2_Medium | chr8    | 132822248 | 132822648 | Promoter (4-5kb)  | 8       | 132817408 | 132847580 | 4840          | ENSG00000129292 | PHF20L1      |
| NR4A2_Medium | chr8    | 132893088 | 132893488 | Promoter (4-5kb)  | 8       | 132897689 | 133134897 | -4201         | ENSG00000042832 | TG           |
| NR4A2_Medium | chr8    | 134689596 | 134689996 | Promoter (6-7kb)  | 8       | 134477788 | 134696554 | 6558          | ENSG00000066827 | ZFAT         |
| NR4A2_Medium | chr8    | 134695294 | 134695694 | Promoter (<=1kb)  | 8       | 134477788 | 134696554 | 860           | ENSG00000066827 | ZFAT         |
| NR4A2_Medium | chr8    | 134859687 | 134860087 | Promoter (9-10kb) | 8       | 134849935 | 134881899 | 9752          | ENSG00000251218 | LOC101927845 |
| NR4A2_Medium | chr8    | 138494157 | 138494557 | Promoter (2-3kb)  | 8       | 138132593 | 138496822 | 2265          | ENSG00000147724 | FAM135B      |
| NR4A2_Medium | chr8    | 139651561 | 139651961 | Promoter (2-3kb)  | 8       | 139600845 | 139654330 | 2369          | ENSG00000169427 | KCNK9        |
| NR4A2_Medium | chr8    | 140011376 | 140011776 | Promoter (2-3kb)  | 8       | 139732093 | 140008591 | -2785         | ENSG00000167632 | TRAPPC9      |
| NR4A2_Medium | chr8    | 140229878 | 140230278 | Promoter (8-9kb)  | 8       | 139988740 | 140238493 | 8215          | ENSG00000167632 | TRAPPC9      |
| NR4A2_Medium | chr8    | 140447829 | 140448229 | Promoter (2-3kb)  | 8       | 139730345 | 140450930 | 2701          | ENSG00000167632 | TRAPPC9      |
| NR4A2_Medium | chr8    | 140451483 | 140451883 | Promoter (<=1kb)  | 8       | 139730345 | 140450930 | -553          | ENSG00000167632 | TRAPPC9      |
| NR4A2_Medium | chr8    | 140632192 | 140632592 | Promoter (2-3kb)  | 8       | 140531421 | 140635546 | 2954          | ENSG00000123908 | AGO2         |
| NR4A2_Medium | chr8    | 140844903 | 140845303 | Promoter (<=1kb)  | 8       | 140659071 | 140846290 | 987           | ENSG00000169398 | PTK2         |
| NR4A2_Medium | chr8    | 141119381 | 141119781 | Promoter (2-3kb)  | 8       | 141117278 | 141141276 | 2103          | ENSG00000105339 | DENND3       |
| NR4A2_Medium | chr8    | 141312420 | 141312820 | Promoter (4-5kb)  | 8       | 141218774 | 141308305 | -4115         | ENSG00000022567 | SLC45A4      |
| NR4A2_Medium | chr8    | 141497023 | 141497423 | Promoter (<=1kb)  | 8       | 141494911 | 141496759 | -264          | ENSG00000226807 | MROH5        |
| NR4A2_Medium | chr8    | 142189636 | 142190036 | Promoter (8-9kb)  | 8       | 142198356 | 142209003 | -8320         | ENSG00000254008 | LINC00051    |
| NR4A2_Medium | chr8    | 142190930 | 142191330 | Promoter (7-8kb)  | 8       | 142198356 | 142209003 | -7026         | ENSG00000254008 | LINC00051    |
| NR4A2_Medium | chr8    | 142192677 | 142193077 | Promoter (5-6kb)  | 8       | 142198356 | 142209003 | -5279         | ENSG00000254008 | LINC00051    |
| NR4A2_Medium | chr8    | 142207338 | 142207738 | Promoter (8-9kb)  | 8       | 142198356 | 142209003 | 8982          | ENSG00000254008 | LINC00051    |
| NR4A2_Medium | chr8    | 142285364 | 142285764 | Promoter (5-6kb)  |         |           |           |               |                 |              |

| Condition    | peakChr | peakStart | peakEnd  | annotation        | geneChr | geneStart | geneEnd  | distanceToTSS | geneID          | geneSymbol |
|--------------|---------|-----------|----------|-------------------|---------|-----------|----------|---------------|-----------------|------------|
| NR4A2_Medium | chr9    | 506208    | 506608   | Promoter (1-2kb)  | 9       | 504716    | 746105   | 1492          | ENSG00000107104 | KANK1      |
| NR4A2_Medium | chr9    | 727358    | 727758   | Promoter (4-5kb)  | 9       | 732442    | 746102   | -4684         | ENSG00000107104 | KANK1      |
| NR4A2_Medium | chr9    | 2152507   | 2152907  | Promoter (4-5kb)  | 9       | 2157680   | 2186154  | -4773         | ENSG00000080503 | SMARCA2    |
| NR4A2_Medium | chr9    | 2182516   | 2182916  | Promoter (<=1kb)  | 9       | 2181571   | 2186183  | 945           | ENSG00000080503 | SMARCA2    |
| NR4A2_Medium | chr9    | 2628773   | 2629173  | Promoter (6-7kb)  | 9       | 2421782   | 2622457  | -6316         | ENSG00000236404 | VLDLR-AS1  |
| NR4A2_Medium | chr9    | 3401899   | 3402299  | Promoter (6-7kb)  | 9       | 3247037   | 3395596  | -6303         | ENSG00000080298 | RFX3       |
| NR4A2_Medium | chr9    | 3965694   | 3966094  | Promoter (9-10kb) | 9       | 3825255   | 3975199  | 9105          | ENSG00000107249 | GLIS3      |
| NR4A2_Medium | chr9    | 4485683   | 4486083  | Promoter (4-5kb)  | 9       | 4490468   | 4587469  | -4385         | ENSG00000106688 | SLC1A1     |
| NR4A2_Medium | chr9    | 4976292   | 4976692  | Promoter (7-8kb)  | 9       | 4984390   | 5078444  | -7698         | ENSG00000096968 | JAK2       |
| NR4A2_Medium | chr9    | 5125136   | 5125536  | Promoter (<=1kb)  | 9       | 5125965   | 5126974  | -429          | ENSG00000096968 | JAK2       |
| NR4A2_Medium | chr9    | 5471710   | 5472110  | Promoter (8-9kb)  | 9       | 5462935   | 5465912  | 8775          | ENSG00000120217 | CD274      |
| NR4A2_Medium | chr9    | 6487416   | 6487816  | Promoter (<=1kb)  | 9       | 6486871   | 6507054  | 545           | ENSG00000147854 | UHRF2      |
| NR4A2_Medium | chr9    | 6497877   | 6498277  | Promoter (<=1kb)  | 9       | 6498352   | 6507054  | -75           | ENSG00000147854 | UHRF2      |
| NR4A2_Medium | chr9    | 6803805   | 6804205  | Promoter (1-2kb)  | 9       | 6805617   | 6819079  | -1412         | ENSG00000107077 | KDM4C      |
| NR4A2_Medium | chr9    | 7044597   | 7044997  | Promoter (4-5kb)  | 9       | 7049192   | 7104017  | -4195         | ENSG00000107077 | KDM4C      |
| NR4A2_Medium | chr9    | 7123590   | 7123990  | Promoter (3-4kb)  | 9       | 7127907   | 7169884  | -3917         | ENSG00000107077 | KDM4C      |
| NR4A2_Medium | chr9    | 7808528   | 7808928  | Promoter (8-9kb)  | 9       | 7798199   | 7800148  | -8380         | ENSG00000137038 | DMAC1      |
| NR4A2_Medium | chr9    | 13478193  | 13478593 | Promoter (9-10kb) | 9       | 13407521  | 13488125 | 9532          | ENSG00000270547 | LINC01235  |
| NR4A2_Medium | chr9    | 14325597  | 14325997 | Promoter (3-4kb)  | 9       | 14087629  | 14322338 | -3259         | ENSG00000147862 | NFIB       |
| NR4A2_Medium | chr9    | 14728059  | 14728459 | Promoter (5-6kb)  | 9       | 14719724  | 14722733 | -5326         | ENSG00000147869 | CER1       |
| NR4A2_Medium | chr9    | 14729463  | 14729863 | Promoter (6-7kb)  | 9       | 14719724  | 14722733 | -6730         | ENSG00000147869 | CER1       |
| NR4A2_Medium | chr9    | 16430656  | 16431056 | Promoter (5-6kb)  | 9       | 16418543  | 16436372 | 5316          | ENSG00000173068 | BNC2       |
| NR4A2_Medium | chr9    | 17570709  | 17571109 | Promoter (7-8kb)  | 9       | 17579066  | 17797124 | -7957         | ENSG00000107295 | SH3GL2     |
| NR4A2_Medium | chr9    | 19126544  | 19126944 | Promoter (<=1kb)  | 9       | 19125506  | 19127475 | 531           | ENSG00000147872 | PLIN2      |
| NR4A2_Medium | chr9    | 19129656  | 19130056 | Promoter (2-3kb)  | 9       | 19115761  | 19127492 | -2164         | ENSG00000147872 | PLIN2      |
| NR4A2_Medium | chr9    | 20375591  | 20375991 | Promoter (6-7kb)  | 9       | 20360753  | 20382452 | 6461          | ENSG00000171843 | MLL3       |
| NR4A2_Medium | chr9    | 20931610  | 20932010 | Promoter (2-3kb)  | 9       | 20928944  | 20944717 | 2666          | ENSG00000188352 | FOCAD      |
| NR4A2_Medium | chr9    | 21166884  | 21167284 | Promoter (<=1kb)  | 9       | 21165637  | 21166660 | -224          | ENSG00000137080 | IFNA21     |
| NR4A2_Medium | chr9    | 21488253  | 21488653 | Promoter (5-6kb)  | 9       | 21480839  | 21482313 | -5940         | ENSG00000184995 | IFNE       |
| NR4A2_Medium | chr9    | 22009804  | 22010204 | Promoter (<=1kb)  | 9       | 22002903  | 22009305 | -499          | ENSG00000147883 | CDKN2B     |
| NR4A2_Medium | chr9    | 23820322  | 23820722 | Promoter (<=1kb)  | 9       | 23690104  | 23821275 | 553           | ENSG00000107105 | ELAVL2     |
| NR4A2_Medium | chr9    | 27104296  | 27104696 | Promoter (4-5kb)  | 9       | 27109141  | 27229687 | -4445         | ENSG00000120156 | TEK        |
| NR4A2_Medium | chr9    | 27272512  | 27272912 | Promoter (5-6kb)  | 9       | 27245680  | 27278503 | 5591          | ENSG00000283945 | LINC00032  |
| NR4A2_Medium | chr9    | 31374368  | 31374768 | Promoter (6-7kb)  | 9       | 31371611  | 31381490 | 6722          | ENSG00000260720 | LINC01243  |
| NR4A2_Medium | chr9    | 33335828  | 33336228 | Promoter (6-7kb)  | 9       | 33342812  | 33351882 | -6584         | ENSG00000086102 | NFX1       |
| NR4A2_Medium | chr9    | 33682215  | 33682615 | Promoter (4-5kb)  | 9       | 33673504  | 33677499 | -4716         | ENSG00000237984 | PTENP1     |
| NR4A2_Medium | chr9    | 34101746  | 34102146 | Promoter (7-8kb)  | 9       | 34089412  | 34093779 | -7967         | ENSG00000198876 | DCAF12     |
| NR4A2_Medium | chr9    | 34120400  | 34120800 | Promoter (4-5kb)  | 9       | 34107361  | 34125703 | 4903          | ENSG00000198876 | DCAF12     |
| NR4A2_Medium | chr9    | 34323120  | 34323520 | Promoter (5-6kb)  | 9       | 34329506  | 34343711 | -5986         | ENSG00000164978 | NUDT2      |
| NR4A2_Medium | chr9    | 34667415  | 34667815 | Promoter (1-2kb)  | 9       | 34665028  | 34666112 | -1303         | ENSG00000187186 | LOC730098  |
| NR4A2_Medium | chr9    | 34988157  | 34988557 | Promoter (<=1kb)  | 9       | 34985410  | 34989379 | 822           | ENSG00000281491 | DNAJB5-DT  |
| NR4A2_Medium | chr9    | 35108313  | 35108713 | Promoter (2-3kb)  | 9       | 35104142  | 35111423 | 2710          | ENSG00000005238 | FAM214B    |
| NR4A2_Medium | chr9    | 35548839  | 35549239 | Promoter (9-10kb) | 9       | 35538980  | 35547236 | 9859          | ENSG00000198853 | RUSC2      |
| NR4A2_Medium | chr9    | 35685414  | 35685814 | Promoter (<=1kb)  | 9       | 35684041  | 35685466 | 0             | ENSG00000198467 | TPM2       |
| NR4A2_Medium | chr9    | 35727403  | 35727803 | Promoter (4-5kb)  | 9       | 35723104  | 35732104 | 4301          | ENSG00000137076 | TLN1       |
| NR4A2_Medium | chr9    | 36178785  | 36179185 | Promoter (9-10kb) | 9       | 36169388  | 36171334 | 9397          | ENSG00000185972 | CCIN       |
| NR4A2_Medium | chr9    | 37432053  | 37432453 | Promoter (2-3kb)  | 9       | 37429786  | 37432811 | 2267          | ENSG00000137106 | GRHPR      |
| NR4A2_Medium | chr9    | 37601750  | 37602150 | Promoter (9-10kb) | 9       | 37588458  | 37592604 | -9146         | ENSG00000175768 | TOMM5      |
| NR4A2_Medium | chr9    | 41229311  | 41230116 | Promoter (3-4kb)  | 9       | 41233755  | 41233835 | -3639         | ENSG00000276029 | MIR4477A   |
| NR4A2_Medium | chr9    | 61856647  | 61857054 | Promoter (2-3kb)  | 9       | 61854216  | 62076341 | 2431          | ENSG00000231527 | FAM27C     |
| NR4A2_Medium | chr9    | 62799297  | 62799697 | Promoter (1-2kb)  | 9       | 62801461  | 62810186 | -1764         | ENSG00000238113 | LINC01410  |
| NR4A2_Medium | chr9    | 63816812  | 63817212 | Promoter (2-3kb)  | 9       | 63819574  | 63819654 | -2362         | ENSG00000266017 | MIR4477B   |
| NR4A2_Medium | chr9    | 63817648  | 63818338 | Promoter (1-2kb)  | 9       | 63819574  | 63819654 | -1236         | ENSG00000266017 | MIR4477B   |
| NR4A2_Medium | chr9    | 63823342  | 63823742 | Promoter (3-4kb)  | 9       | 63819574  | 63819654 | 3768          | ENSG00000266017 | MIR4477B   |
| NR4A2_Medium | chr9    | 68355935  | 68356335 | Promoter (<=1kb)  | 9       | 68356611  | 68531061 | -276          | ENSG00000154330 | PGM5       |
| NR4A2_Medium | chr9    | 68491051  | 68491451 | Promoter (5-6kb)  | 9       | 68496825  | 68531061 | -5374         | ENSG00000154330 | PGM5       |
| NR4A2_Medium | chr9    | 69171753  | 69172153 | Promoter (2-3kb)  | 9       | 69174277  | 69255201 | -2124         | ENSG00000119139 | TJP2       |
| NR4A2_Medium | chr9    | 70423483  | 70423883 | Promoter (8-9kb)  | 9       | 70384597  | 70414624 | -8859         | ENSG00000119138 | KLF9       |
| NR4A2_Medium | chr9    | 70810071  | 70810471 | Promoter (<=1kb)  | 9       | 70809975  | 70810084 | 0             | ENSG00000207935 | MIR204     |
| NR4A2_Medium | chr9    | 71437250  | 71437650 | Promoter (9-10kb) | 9       | 70535944  | 71446835 | 9185          | ENSG00000083067 | TRPM3      |
| NR4A2_Medium | chr9    | 72312654  | 72313054 | Promoter (7-8kb)  | 9       | 72305517  | 72315464 | 7137          | ENSG00000225434 | LINC01504  |
| NR4A2_Medium | chr9    | 72519472  | 72519872 | Promoter (1-2kb)  | 9       | 72521608  | 72627969 | -1736         | ENSG00000165091 | TMC1       |
| NR4A2_Medium | chr9    | 76392836  | 76393236 | Promoter (<=1kb)  | 9       | 76387284  | 76393766 | 530           | ENSG00000135002 | RFK        |
| NR4A2_Medium | chr9    | 76434538  | 76434938 | Promoter (6-7kb)  | 9       | 76441666  | 76507414 | -6728         | ENSG00000187210 | GCNT1      |
| NR4A2_Medium | chr9    | 76463750  | 76464150 | Promoter (4-5kb)  | 9       | 76459283  | 76651203 | 4467          | ENSG00000187210 | GCNT1      |
| NR4A2_Medium | chr9    | 76636682  | 76637082 | Promoter (8-9kb)  | 9       | 76641947  | 76645138 | 8056          | ENSG00000106772 | PRUNE2     |
| NR4A2_Medium | chr9    | 76861030  | 76861430 | Promoter (7-8kb)  | 9       | 76846599  | 76869182 | 7752          | ENSG00000106772 | PRUNE2     |
| NR4A2_Medium | chr9    | 77454403  | 77454803 | Promoter (1-2kb)  | 9       | 77456295  | 77526697 | -1492         | ENSG00000231373 | GNA14-AS1  |
| NR4A2_Medium | chr9    | 78295728  | 78296128 | Promoter (<=1kb)  | 9       | 78297125  | 78330093 | -997          | ENSG00000135069 | PSAT1      |
| NR4A2_Medium | chr9    | 83272377  | 83272777 | Promoter (5-6kb)  | 9       | 83242990  | 83267287 | -5090         | ENSG00000172159 | FRMD3      |
| NR4A2_Medium | chr9    | 83288555  | 83288955 | Promoter (6-7kb)  | 9       | 83247972  | 83281608 | -6947         | ENSG00000172159 | FRMD3      |
| NR4A2_Medium | chr9    | 83823144  | 83823544 | Promoter (5-6kb)  | 9       | 83816996  | 83818121 | -5023         | ENSG00000165113 | GKAP1      |
| NR4A2_Medium | chr9    | 83930148  | 83930548 | Promoter (8-9kb)  | 9       | 83836698  | 83921465 | -8683         | ENSG00000165115 | KIF27      |
| NR4A2_Medium | chr9    | 86259703  | 86260103 | Promoter (<=1kb)  | 9       | 86220265  | 86259657 | -46           | ENSG00000187753 | C9orf153   |
| NR4A2_Medium | chr9    | 86262845  | 86263245 | Promoter (3-4kb)  | 9       | 86220265  | 86259657 | -3188         | ENSG00000187753 | C9orf153   |
| NR4A2_Medium | chr9    | 87076401  | 87076801 | Promoter (8-9kb)  | 9       | 87084161  | 87085151 | 8350          | NA              | NFYCP2     |
| NR4A2_Medium | chr9    | 87764881  | 87765281 | Promoter (7-8kb)  | 9       | 87772453  | 87774299 | -7172         | ENSG00000188029 | CTSL3P     |
| NR4A2_Medium | chr9    | 87885115  | 87885515 | Promoter (2-3kb)  | 9       | 87882877  | 87888903 | 2238          | ENSG00000177992 | SPATA31E1  |
| NR4A2_Medium | chr9    | 88542776  | 88543176 | Promoter (7-8kb)  | 9       | 88535186  | 88584274 | 7590          | ENSG00000130045 | NXNL2      |
| NR4A2_Medium | chr9    | 88743230  | 88743630 | Promoter (2-3kb)  | 9       | 88745836  | 88745905 | 2275          | ENSG00000265873 | MIR4289    |
| NR4A2_Medium | chr9    | 88994804  | 88995204 | Promoter (3-4kb)  | 9       | 88991468  | 89005155 | 3336          | ENSG00000213694 | S1PR3      |
| NR4A2_Medium | chr9    | 89423702  | 89424102 | Promoter (4-5kb)  | 9       | 89376386  | 89418833 | -4869         | ENSG00000187764 | SEMA4D     |
| NR4A2_Medium | chr9    | 89649259  | 89649659 | Promoter (9-10kb) | 9       | 89639814  | 89719759 | 9445          | ENSG00000237372 | UNQ6494    |
| NR4A2_Medium | chr9    | 89666319  | 89666719 | Promoter (3-4kb)  | 9       | 89662982  | 89672981 | 3337          | ENSG00000237372 | UNQ6494    |
| NR4A2_Medium | chr9    | 90803406  | 90803806 | Promoter (1-2kb)  | 9       | 90801962  | 90844246 | 1444          | ENSG00000165025 | SYK        |
| NR4A2_Medium | chr9    | 92028479  | 92028879 | Promoter (9-10kb) | 9       | 92032354  | 92038458 | 9579          | ENSG00000090054 | SPTLC1     |
| NR4A2_Medium | chr9    | 92105650  | 92106050 | Promoter (2-3kb)  | 9       | 92079853  | 92108768 | 2718          | ENSG00000090054 | SPTLC1     |
| NR4A2_Medium | chr9    | 92141868  | 92142268 | Promoter (<=1kb)  | 9       | 92141596  | 92145110 | 272           | NA              | LINC00475  |
| NR4A2_Medium | chr9    | 92260576  | 92260976 | Promoter (<=1kb)  | 9       | 92256357  | 92260212 | -364          | ENSG00000196305 | IARS1      |
| NR4A2_Medium | chr9    | 92629370  | 92629770 | Promoter (8-9kb)  | 9       | 92615527  | 92638079 | 8309          | ENSG00000127080 | IPPK       |
| NR4A2_Medium | chr9    | 92812900  | 92813300 | Promoter (<=1kb)  | 9       | 92813907  | 92838457 | -607          | ENSG00000187984 | ANKRD19P   |
| NR4A2_Medium | chr9    | 93136081  | 93136481 | Promoter (1-2kb)  | 9       | 93121496  | 93134251 | -1830         | ENSG00000131669 | NINJ1      |
| NR4A2_Medium | chr9    | 93963622  | 93964022 | Promoter (7-8kb)  | 9       | 93955834  | 93957922 | 7788          | ENSG00000235601 | BARX1-DT   |
| NR4A2_Medium | chr9    | 94958889  | 94959289 | Promoter (2-3kb)  | 9       | 94955946  | 95006200 | 2943          | ENSG00000148120 | AOPEP      |
| NR4A2_Medium | chr9    | 94965375  | 94965775 | Promoter (2-3kb)  | 9       | 94967784  | 95060919 | -2009         | ENSG00000148120 | AOPEP      |
| NR4A2_Medium | chr9    | 95472830  | 95473230 | Promoter (3-4kb)  | 9       | 95467287  | 95469189 | -3641         | ENSG00000185920 | PTCH1      |



| Condition    | peakChr | peakStart | peakEnd   | annotation        | geneChr | geneStart | geneEnd   | distanceToTSS | geneID          | geneSymbol |
|--------------|---------|-----------|-----------|-------------------|---------|-----------|-----------|---------------|-----------------|------------|
| NR4A2_Medium | chr9    | 104509188 | 104509588 | Promoter (4-5kb)  | 9       | 104504263 | 104505222 | 4925          | ENSG00000186881 | OR13F1     |
| NR4A2_Medium | chr9    | 105446954 | 105447354 | Promoter (<=1kb)  | 9       | 105447796 | 105530963 | -442          | ENSG00000106701 | FSD1L      |
| NR4A2_Medium | chr9    | 105986414 | 105986814 | Promoter (6-7kb)  | 9       | 105993310 | 106702662 | -6496         | ENSG00000234323 | LINC01505  |
| NR4A2_Medium | chr9    | 110207578 | 110207978 | Promoter (<=1kb)  | 9       | 110190048 | 110207480 | -98           | ENSG00000188959 | C9orf152   |
| NR4A2_Medium | chr9    | 112181094 | 112181494 | Promoter (5-6kb)  | 9       | 112040785 | 112175408 | -5686         | ENSG00000106868 | SUSD1      |
| NR4A2_Medium | chr9    | 112837665 | 112838065 | Promoter (<=1kb)  | 9       | 112838585 | 112866525 | -520          | ENSG00000148158 | SNX30      |
| NR4A2_Medium | chr9    | 113308091 | 113308491 | Promoter (4-5kb)  | 9       | 113302101 | 113303376 | -4715         | ENSG00000165188 | RNF183     |
| NR4A2_Medium | chr9    | 114278205 | 114278605 | Promoter (9-10kb) | 9       | 114268807 | 114274230 | 9398          | ENSG00000196739 | COL27A1    |
| NR4A2_Medium | chr9    | 114809475 | 114809875 | Promoter (3-4kb)  | 9       | 114784652 | 114806039 | -3436         | ENSG00000181634 | TNFSF15    |
| NR4A2_Medium | chr9    | 117221811 | 117222211 | Promoter (7-8kb)  | 9       | 116425228 | 117214553 | -7258         | ENSG00000148219 | ASTN2      |
| NR4A2_Medium | chr9    | 120876022 | 120876422 | Promoter (<=1kb)  | 9       | 120870487 | 120876433 | 11            | ENSG00000119403 | PHF19      |
| NR4A2_Medium | chr9    | 120890185 | 120890585 | Promoter (4-5kb)  | 9       | 120855698 | 120894896 | 4311          | ENSG00000119403 | PHF19      |
| NR4A2_Medium | chr9    | 121202008 | 121202408 | Promoter (<=1kb)  | 9       | 121178133 | 121201869 | -139          | ENSG00000119396 | RAB14      |
| NR4A2_Medium | chr9    | 121734139 | 121734539 | Promoter (2-3kb)  | 9       | 121737151 | 121785530 | -2612         | ENSG00000136848 | DAB2IP     |
| NR4A2_Medium | chr9    | 122179437 | 122179837 | Promoter (9-10kb) | 9       | 122169661 | 122174754 | 9776          | ENSG00000185681 | MORN5      |
| NR4A2_Medium | chr9    | 122250456 | 122250856 | Promoter (2-3kb)  | 9       | 122241670 | 122247546 | -2910         | ENSG00000119446 | RBM18      |
| NR4A2_Medium | chr9    | 122253742 | 122254142 | Promoter (6-7kb)  | 9       | 122241670 | 122247546 | -6196         | ENSG00000119446 | RBM18      |
| NR4A2_Medium | chr9    | 122844419 | 122844819 | Promoter (6-7kb)  | 9       | 122849799 | 122851569 | 6750          | ENSG00000056586 | RC3H2      |
| NR4A2_Medium | chr9    | 123266641 | 123267041 | Promoter (1-2kb)  | 9       | 123125220 | 123268564 | 1523          | ENSG00000165209 | STRBP      |
| NR4A2_Medium | chr9    | 123347482 | 123347882 | Promoter (8-9kb)  | 9       | 123356170 | 123374099 | -8288         | ENSG00000148204 | CRB2       |
| NR4A2_Medium | chr9    | 123486808 | 123487208 | Promoter (1-2kb)  | 9       | 123485529 | 123485622 | -1186         | ENSG00000274932 | MIR7150    |
| NR4A2_Medium | chr9    | 123584208 | 123584608 | Promoter (<=1kb)  | 9       | 123411293 | 123583217 | -991          | ENSG00000119522 | DENND1A    |
| NR4A2_Medium | chr9    | 124419451 | 124419851 | Promoter (4-5kb)  | 9       | 124396760 | 124415444 | -4007         | ENSG00000136930 | PSMB7      |
| NR4A2_Medium | chr9    | 125255887 | 125256287 | Promoter (5-6kb)  | 9       | 125261794 | 125341864 | -5507         | ENSG00000165219 | GAPVD1     |
| NR4A2_Medium | chr9    | 125507794 | 125508194 | Promoter (1-2kb)  | 9       | 125438813 | 125506366 | -1428         | ENSG00000119487 | MAPKAP1    |
| NR4A2_Medium | chr9    | 125576442 | 125576842 | Promoter (8-9kb)  | 9       | 125559114 | 125585627 | 8785          | ENSG00000119487 | MAPKAP1    |
| NR4A2_Medium | chr9    | 125596583 | 125596983 | Promoter (<=1kb)  | 9       | 125438655 | 125595646 | -937          | ENSG00000119487 | MAPKAP1    |
| NR4A2_Medium | chr9    | 125667134 | 125667534 | Promoter (2-3kb)  | 9       | 125665366 | 125669845 | 2311          | ENSG00000119487 | MAPKAP1    |
| NR4A2_Medium | chr9    | 126620319 | 126620719 | Promoter (5-6kb)  | 9       | 126614469 | 126696549 | 5850          | ENSG00000136944 | LMX1B      |
| NR4A2_Medium | chr9    | 127245787 | 127246187 | Promoter (<=1kb)  | 9       | 127245337 | 127320778 | 450           | ENSG00000136895 | GARNL3     |
| NR4A2_Medium | chr9    | 127367386 | 127367786 | Promoter (5-6kb)  | 9       | 127361716 | 127393538 | 5670          | ENSG00000136895 | GARNL3     |
| NR4A2_Medium | chr9    | 127584431 | 127584831 | Promoter (5-6kb)  | 9       | 127579370 | 127690886 | 5061          | ENSG00000136854 | STXBP1     |
| NR4A2_Medium | chr9    | 127677421 | 127677821 | Promoter (<=1kb)  | 9       | 127678524 | 127684680 | -703          | ENSG00000136854 | STXBP1     |
| NR4A2_Medium | chr9    | 127732749 | 127733149 | Promoter (<=1kb)  | 9       | 127731912 | 127732874 | 0             | ENSG00000160404 | TOR2A      |
| NR4A2_Medium | chr9    | 127775451 | 127775851 | Promoter (1-2kb)  | 9       | 127742849 | 127774144 | -1307         | ENSG00000095370 | SH2D3C     |
| NR4A2_Medium | chr9    | 127795165 | 127795565 | Promoter (<=1kb)  | 9       | 127794682 | 127808301 | 483           | ENSG00000136877 | FPGS       |
| NR4A2_Medium | chr9    | 128077306 | 128077706 | Promoter (9-10kb) | 9       | 128068293 | 128109245 | 9013          | ENSG00000148339 | SLC25A25   |
| NR4A2_Medium | chr9    | 128136555 | 128136955 | Promoter (8-9kb)  | 9       | 128128529 | 128130628 | 8026          | ENSG00000232850 | PTGES2-AS1 |
| NR4A2_Medium | chr9    | 128215385 | 128215785 | Promoter (2-3kb)  | 9       | 128218243 | 128242295 | -2458         | ENSG00000106976 | DNM1       |
| NR4A2_Medium | chr9    | 128264115 | 128264515 | Promoter (1-2kb)  | 9       | 128261685 | 128265937 | 1422          | ENSG00000167110 | GOLGA2     |
| NR4A2_Medium | chr9    | 128427419 | 128427819 | Promoter (<=1kb)  | 9       | 128428388 | 128437344 | -569          | ENSG00000167123 | CERCAM     |
| NR4A2_Medium | chr9    | 128772352 | 128772752 | Promoter (<=1kb)  | 9       | 128753815 | 128772414 | 0             | ENSG00000160445 | ZER1       |
| NR4A2_Medium | chr9    | 128825782 | 128826182 | Promoter (<=1kb)  | 9       | 128822798 | 128826223 | 41            | ENSG00000198917 | SPOUT1     |
| NR4A2_Medium | chr9    | 128845075 | 128845475 | Promoter (<=1kb)  | 9       | 128838275 | 128845408 | 0             | ENSG00000171097 | KYAT1      |
| NR4A2_Medium | chr9    | 128947689 | 128948089 | Promoter (<=1kb)  | 9       | 128947699 | 129007096 | 0             | ENSG00000095319 | NUP188     |
| NR4A2_Medium | chr9    | 129126140 | 129126540 | Promoter (6-7kb)  | 9       | 129119513 | 129129065 | 6627          | ENSG00000119383 | PTPA       |
| NR4A2_Medium | chr9    | 129716597 | 129716997 | Promoter (1-2kb)  | 9       | 129712896 | 129718635 | 1638          | ENSG00000236024 | PRRX2-AS1  |
| NR4A2_Medium | chr9    | 130052211 | 130052611 | Promoter (<=1kb)  | 9       | 130053426 | 130140164 | -815          | ENSG00000148358 | GPR107     |
| NR4A2_Medium | chr9    | 130169784 | 130170184 | Promoter (2-3kb)  | 9       | 130172404 | 130237303 | -2220         | ENSG00000107130 | NCS1       |
| NR4A2_Medium | chr9    | 130299514 | 130299914 | Promoter (7-8kb)  | 9       | 130307519 | 130338606 | -7605         | ENSG00000148357 | HMCN2      |
| NR4A2_Medium | chr9    | 130304407 | 130304807 | Promoter (2-3kb)  | 9       | 130307519 | 130338606 | -2712         | ENSG00000148357 | HMCN2      |
| NR4A2_Medium | chr9    | 130483623 | 130484023 | Promoter (3-4kb)  | 9       | 130479856 | 130501178 | 3767          | ENSG00000130707 | ASS1       |
| NR4A2_Medium | chr9    | 130485266 | 130485666 | Promoter (5-6kb)  | 9       | 130479856 | 130501178 | 5410          | ENSG00000130707 | ASS1       |
| NR4A2_Medium | chr9    | 130573528 | 130573928 | Promoter (5-6kb)  | 9       | 130578965 | 130582086 | -5037         | ENSG00000107164 | FUBP3      |
| NR4A2_Medium | chr9    | 130898726 | 130899126 | Promoter (1-2kb)  | 9       | 130892707 | 130896812 | -1914         | ENSG00000188710 | QRFP       |
| NR4A2_Medium | chr9    | 131135694 | 131136094 | Promoter (<=1kb)  | 9       | 131135988 | 131146193 | 0             | ENSG00000126883 | NUP214     |
| NR4A2_Medium | chr9    | 131462674 | 131463074 | Promoter (7-8kb)  | 9       | 131455143 | 131470791 | 7531          | ENSG00000130723 | PRRC2B     |
| NR4A2_Medium | chr9    | 132071433 | 132071833 | Promoter (7-8kb)  | 9       | 132031886 | 132079645 | 7812          | ENSG00000160563 | MED27      |
| NR4A2_Medium | chr9    | 132281813 | 132282213 | Promoter (3-4kb)  | 9       | 132274923 | 132278109 | -3704         | ENSG00000107290 | SETX       |
| NR4A2_Medium | chr9    | 132355668 | 132356068 | Promoter (<=1kb)  | 9       | 132261356 | 132354986 | -682          | ENSG00000107290 | SETX       |
| NR4A2_Medium | chr9    | 132373915 | 132374315 | Promoter (4-5kb)  | 9       | 132375735 | 132379205 | 4890          | ENSG00000125482 | TTF1       |
| NR4A2_Medium | chr9    | 132974403 | 132974803 | Promoter (3-4kb)  | 9       | 132978651 | 132991650 | -3848         | ENSG00000165702 | GF1B       |
| NR4A2_Medium | chr9    | 133028517 | 133028917 | Promoter (1-2kb)  | 9       | 133030675 | 133058501 | -1758         | ENSG00000148308 | GTF3C5     |
| NR4A2_Medium | chr9    | 133070270 | 133070670 | Promoter (8-9kb)  | 9       | 133061978 | 133071861 | 8292          | ENSG00000170835 | CEL        |
| NR4A2_Medium | chr9    | 133523726 | 133524126 | Promoter (<=1kb)  | 9       | 133514586 | 133524959 | 833           | ENSG00000187616 | MYMK       |
| NR4A2_Medium | chr9    | 133668147 | 133668547 | Promoter (1-2kb)  | 9       | 133663972 | 133667123 | -1024         | ENSG00000123453 | SARDH      |
| NR4A2_Medium | chr9    | 133749688 | 133750088 | Promoter (9-10kb) | 9       | 133725393 | 133739955 | -9733         | ENSG00000123453 | SARDH      |
| NR4A2_Medium | chr9    | 133933535 | 133933935 | Promoter (5-6kb)  | 9       | 133925851 | 133939301 | 5366          | ENSG00000160293 | VAV2       |
| NR4A2_Medium | chr9    | 133983556 | 133983956 | Promoter (8-9kb)  | 9       | 133861212 | 133992259 | 8303          | ENSG00000160293 | VAV2       |
| NR4A2_Medium | chr9    | 134125421 | 134125821 | Promoter (9-10kb) | 9       | 134135365 | 134140790 | -9544         | ENSG00000196363 | WDR5       |
| NR4A2_Medium | chr9    | 134324162 | 134324562 | Promoter (1-2kb)  | 9       | 134326455 | 134440585 | -1893         | ENSG00000186350 | RXRA       |
| NR4A2_Medium | chr9    | 134368784 | 134369184 | Promoter (2-3kb)  | 9       | 134371971 | 134440585 | -2787         | ENSG00000186350 | RXRA       |
| NR4A2_Medium | chr9    | 134653920 | 134654320 | Promoter (<=1kb)  | 9       | 134653185 | 134709227 | 735           | ENSG00000130635 | COL5A1     |
| NR4A2_Medium | chr9    | 134848340 | 134848740 | Promoter (<=1kb)  | 9       | 134849298 | 134849369 | 629           | ENSG00000264744 | MIR3689C   |
| NR4A2_Medium | chr9    | 135084200 | 135084600 | Promoter (1-2kb)  | 9       | 135086554 | 135098352 | -1954         | ENSG00000130558 | OLFM1      |
| NR4A2_Medium | chr9    | 135091549 | 135091949 | Promoter (3-4kb)  | 9       | 135095060 | 135119654 | -3111         | ENSG00000130558 | OLFM1      |
| NR4A2_Medium | chr9    | 135334017 | 135334417 | Promoter (8-9kb)  | 9       | 135343249 | 135346562 | -8832         | ENSG00000178243 | C9orf62    |
| NR4A2_Medium | chr9    | 135572704 | 135573104 | Promoter (1-2kb)  | 9       | 135574935 | 135585364 | -1831         | ENSG00000237339 | LINC01502  |
| NR4A2_Medium | chr9    | 135655208 | 135655608 | Promoter (7-8kb)  | 9       | 135663322 | 135665913 | -7714         | ENSG00000148386 | LCN9       |
| NR4A2_Medium | chr9    | 135726803 | 135727203 | Promoter (9-10kb) | 9       | 135736517 | 135793618 | -9294         | ENSG00000107147 | KCNT1      |
| NR4A2_Medium | chr9    | 135752523 | 135752923 | Promoter (<=1kb)  | 9       | 135753751 | 135786399 | -816          | ENSG00000107147 | KCNT1      |
| NR4A2_Medium | chr9    | 135761519 | 135761919 | Promoter (3-4kb)  | 9       | 135765685 | 135768494 | -3766         | ENSG00000107147 | KCNT1      |
| NR4A2_Medium | chr9    | 135773966 | 135774366 | Promoter (1-2kb)  | 9       | 135772858 | 135784858 | 1108          | ENSG00000107147 | KCNT1      |
| NR4A2_Medium | chr9    | 136049398 | 136049798 | Promoter (<=1kb)  | 9       | 136006537 | 136050580 | 782           | ENSG00000148411 | NACC2      |
| NR4A2_Medium | chr9    | 136085794 | 136086194 | Promoter (9-10kb) | 9       | 136006537 | 136095289 | 9095          | ENSG00000148411 | NACC2      |
| NR4A2_Medium | chr9    | 136208811 | 136209211 | Promoter (3-4kb)  | 9       | 136196250 | 136205128 | -3683         | ENSG00000107187 | LHX3       |
| NR4A2_Medium | chr9    | 136236322 | 136236722 | Promoter (9-10kb) | 9       | 136206333 | 136245841 | 9119          | ENSG00000165661 | QSOX2      |
| NR4A2_Medium | chr9    | 136308111 | 136308511 | Promoter (1-2kb)  | 9       | 136281380 | 136306901 | -1210         | ENSG00000260220 | CCDC187    |
| NR4A2_Medium | chr9    | 136308721 | 136309121 | Promoter (1-2kb)  | 9       | 136281380 | 136306901 | -1820         | ENSG00000260220 | CCDC187    |
| NR4A2_Medium | chr9    | 136446321 | 136446721 | Promoter (2-3kb)  | 9       | 136440103 | 136448842 | 2121          | ENSG00000148396 | SEC16A     |
| NR4A2_Medium | chr9    | 136510494 | 136510894 | Promoter (2-3kb)  | 9       | 136510511 | 136513110 | 2216          | ENSG00000148400 | NOTCH1     |
| NR4A2_Medium | chr9    | 136554275 | 136554675 | Promoter (5-6kb)  | 9       | 136549130 | 136549893 | 5145          | NA              | NALT1      |
| NR4A2_Medium | chr9    | 136775436 | 136775836 | Promoter (9-10kb) | 9       | 136759636 | 13676625  |               |                 |            |

| Condition    | peakChr | peakStart | peakEnd   | annotation        | geneChr | geneStart | geneEnd   | distanceToTSS | geneID           | geneSymbol   |
|--------------|---------|-----------|-----------|-------------------|---------|-----------|-----------|---------------|------------------|--------------|
| NR4A2_Medium | chr9    | 138142724 | 138143124 | Promoter (6-7kb)  | 9       | 138150075 | 138174700 | -6951         | NA               | TUBBP5       |
| NR4A2_Medium | chr9    | 138177322 | 138177722 | Promoter (2-3kb)  | 9       | 138175045 | 138177264 | 2277          | NA               | TUBBP5       |
| NR4A2_Medium | chr9    | 138179592 | 138179992 | Promoter (4-5kb)  | 9       | 138175045 | 138177264 | 4547          | NA               | TUBBP5       |
| NR4A2_Medium | chr10   | 81066     | 81592     | Promoter (6-7kb)  | 10      | 46892     | 74163     | -6903         | ENSG00000261456  | TUBB8        |
| NR4A2_Medium | chr10   | 128890    | 129290    | Promoter (5-6kb)  | 10      | 134465    | 237651    | -5175         | ENSG00000015171  | ZMYND11      |
| NR4A2_Medium | chr10   | 388810    | 389210    | Promoter (<=1kb)  | 10      | 364962    | 390016    | 806           | ENSG000000151240 | DIP2C        |
| NR4A2_Medium | chr10   | 2011106   | 2011506   | Promoter (2-3kb)  | 10      | 1989076   | 2014192   | 2686          | NA               | LINC00700    |
| NR4A2_Medium | chr10   | 2500779   | 2501179   | Promoter (<=1kb)  | 10      | 2446256   | 2501769   | 590           | NA               | LINC02645    |
| NR4A2_Medium | chr10   | 3110614   | 3111014   | Promoter (2-3kb)  | 10      | 3113458   | 3129941   | -2444         | ENSG00000067057  | PFKP         |
| NR4A2_Medium | chr10   | 3124875   | 3125275   | Promoter (3-4kb)  | 10      | 3129007   | 3136793   | -3732         | ENSG00000067057  | PFKP         |
| NR4A2_Medium | chr10   | 3991076   | 3991476   | Promoter (<=1kb)  | 10      | 3991160   | 3991259   | 0             | ENSG00000274809  | MIR6078      |
| NR4A2_Medium | chr10   | 4777612   | 4778012   | Promoter (8-9kb)  | 10      | 4786629   | 4837583   | -8617         | ENSG00000165568  | AKR1E2       |
| NR4A2_Medium | chr10   | 5416805   | 5417205   | Promoter (4-5kb)  | 10      | 5412557   | 5459056   | 4248          | ENSG00000173848  | NET1         |
| NR4A2_Medium | chr10   | 5439652   | 5440052   | Promoter (6-7kb)  | 10      | 5446609   | 5452897   | -6557         | ENSG00000173848  | NET1         |
| NR4A2_Medium | chr10   | 5498018   | 5498418   | Promoter (1-2kb)  | 10      | 5498697   | 5499570   | 1152          | ENSG00000178372  | CALML5       |
| NR4A2_Medium | chr10   | 5640873   | 5641273   | Promoter (<=1kb)  | 10      | 5638867   | 5641812   | 539           | ENSG00000196372  | ASB13        |
| NR4A2_Medium | chr10   | 5736172   | 5736572   | Promoter (5-6kb)  | 10      | 5730662   | 5739813   | 5510          | ENSG00000108021  | TASOR2       |
| NR4A2_Medium | chr10   | 6094927   | 6095327   | Promoter (1-2kb)  | 10      | 6096910   | 6110059   | -1583         | ENSG00000134453  | RBM17        |
| NR4A2_Medium | chr10   | 6121450   | 6121850   | Promoter (7-8kb)  | 10      | 6114147   | 6115872   | 7303          | ENSG00000134453  | RBM17        |
| NR4A2_Medium | chr10   | 6513280   | 6513680   | Promoter (1-2kb)  | 10      | 6427143   | 6512172   | -1108         | ENSG00000065675  | PRKCQ        |
| NR4A2_Medium | chr10   | 6739718   | 6740118   | Promoter (2-3kb)  | 10      | 6737418   | 6840712   | 2300          | ENSG00000238266  | LINC00707    |
| NR4A2_Medium | chr10   | 7576273   | 7576673   | Promoter (<=1kb)  | 10      | 7569162   | 7576597   | 0             | ENSG00000123243  | ITIH5        |
| NR4A2_Medium | chr10   | 7788824   | 7789224   | Promoter (<=1kb)  | 10      | 7788210   | 7799550   | 614           | ENSG00000165629  | ATP5F1C      |
| NR4A2_Medium | chr10   | 7815052   | 7815452   | Promoter (3-4kb)  | 10      | 7818505   | 8016631   | -3053         | ENSG00000165632  | TAF3         |
| NR4A2_Medium | chr10   | 8059462   | 8059862   | Promoter (1-2kb)  | 10      | 8058399   | 8074064   | 1063          | ENSG00000107485  | GATA3        |
| NR4A2_Medium | chr10   | 9273946   | 9274346   | Promoter (1-2kb)  | 10      | 9275833   | 9287057   | -1487         | NA               | LINC00709    |
| NR4A2_Medium | chr10   | 12231250  | 12231650  | Promoter (<=1kb)  | 10      | 12230948  | 12250589  | 302           | ENSG00000151465  | CDC123       |
| NR4A2_Medium | chr10   | 12662851  | 12663251  | Promoter (9-10kb) | 10      | 12653138  | 12653197  | -9654         | ENSG00000283699  | MIR4481      |
| NR4A2_Medium | chr10   | 13348437  | 13348837  | Promoter (<=1kb)  | 10      | 13317439  | 13348298  | -139          | ENSG00000086475  | SEPHS1       |
| NR4A2_Medium | chr10   | 13490430  | 13490830  | Promoter (6-7kb)  | 10      | 13492692  | 13496929  | 6099          | ENSG00000165626  | BEND7        |
| NR4A2_Medium | chr10   | 13521078  | 13521478  | Promoter (4-5kb)  | 10      | 13480885  | 13526187  | 4709          | ENSG00000165626  | BEND7        |
| NR4A2_Medium | chr10   | 13583559  | 13583959  | Promoter (2-3kb)  | 10      | 13586939  | 13614060  | -2980         | ENSG00000165630  | PRPF18       |
| NR4A2_Medium | chr10   | 13715200  | 13715600  | Promoter (7-8kb)  | 10      | 13692169  | 13707757  | -7443         | ENSG00000151474  | FRMD4A       |
| NR4A2_Medium | chr10   | 14467532  | 14467932  | Promoter (5-6kb)  | 10      | 14326175  | 14462142  | -5390         | ENSG00000151474  | FRMD4A       |
| NR4A2_Medium | chr10   | 14541994  | 14542394  | Promoter (6-7kb)  | 10      | 14521089  | 14548640  | 6246          | ENSG00000065809  | FAM107B      |
| NR4A2_Medium | chr10   | 14825909  | 14826309  | Promoter (1-2kb)  | 10      | 14819885  | 14828205  | 1896          | ENSG00000185267  | CDNF         |
| NR4A2_Medium | chr10   | 15136201  | 15136601  | Promoter (4-5kb)  | 10      | 15132817  | 15141353  | 4752          | ENSG00000152465  | NMT2         |
| NR4A2_Medium | chr10   | 15254375  | 15254775  | Promoter (5-6kb)  | 10      | 15214171  | 15248707  | -5668         | ENSG00000148468  | FAM171A1     |
| NR4A2_Medium | chr10   | 15375555  | 15375955  | Promoter (4-5kb)  | 10      | 15211643  | 15371289  | -4266         | ENSG00000148468  | FAM171A1     |
| NR4A2_Medium | chr10   | 18358988  | 18359388  | Promoter (7-8kb)  | 10      | 18366906  | 18540275  | -7518         | ENSG00000165995  | CACNB2       |
| NR4A2_Medium | chr10   | 18555700  | 18556100  | Promoter (3-4kb)  | 10      | 18546062  | 18551822  | -3878         | ENSG00000241058  | NSUN6        |
| NR4A2_Medium | chr10   | 21659086  | 21659486  | Promoter (9-10kb) | 10      | 21668972  | 21671014  | -9486         | ENSG00000078403  | MLLT10       |
| NR4A2_Medium | chr10   | 22004062  | 22004462  | Promoter (<=1kb)  | 10      | 21920610  | 22003769  | -293          | ENSG00000136770  | DNAJC1       |
| NR4A2_Medium | chr10   | 23010388  | 23010788  | Promoter (3-4kb)  | 10      | 23006735  | 23008374  | 3653          | ENSG00000165309  | ARMC3        |
| NR4A2_Medium | chr10   | 23334803  | 23335203  | Promoter (8-9kb)  | 10      | 23343957  | 23345181  | -8754         | ENSG00000224215  | LOC105376453 |
| NR4A2_Medium | chr10   | 23339951  | 23340351  | Promoter (3-4kb)  | 10      | 23343957  | 23345181  | -3606         | ENSG00000224215  | LOC105376453 |
| NR4A2_Medium | chr10   | 25052538  | 25052938  | Promoter (9-10kb) | 10      | 24981980  | 25062279  | 9341          | ENSG00000151023  | ENKUR        |
| NR4A2_Medium | chr10   | 26208229  | 26208629  | Promoter (5-6kb)  | 10      | 26202721  | 26212393  | 5508          | ENSG00000095777  | MYO3A        |
| NR4A2_Medium | chr10   | 27154899  | 27155299  | Promoter (<=1kb)  | 10      | 27145419  | 27155266  | 0             | ENSG00000136758  | YME1L1       |
| NR4A2_Medium | chr10   | 27982624  | 27983024  | Promoter (<=1kb)  | 10      | 27812166  | 27983106  | 82            | ENSG00000169126  | ARMC4        |
| NR4A2_Medium | chr10   | 28295410  | 28295810  | Promoter (6-7kb)  | 10      | 28289258  | 28289350  | -6060         | ENSG00000275036  | MIR8086      |
| NR4A2_Medium | chr10   | 28751086  | 28751486  | Promoter (7-8kb)  | 10      | 28743913  | 28880246  | 7173          | NA               | LINC01517    |
| NR4A2_Medium | chr10   | 29731567  | 29731967  | Promoter (3-4kb)  | 10      | 29457338  | 29735804  | 3837          | ENSG00000197321  | SVIL         |
| NR4A2_Medium | chr10   | 30053661  | 30054061  | Promoter (5-6kb)  | 10      | 30012803  | 30059586  | 5525          | ENSG00000165757  | JCAD         |
| NR4A2_Medium | chr10   | 32277767  | 32278167  | Promoter (5-6kb)  | 10      | 32271554  | 32272249  | -5518         | ENSG00000120616  | EPC1         |
| NR4A2_Medium | chr10   | 32946910  | 32947310  | Promoter (8-9kb)  | 10      | 32928150  | 32955663  | 8353          | ENSG00000150093  | ITGB1        |
| NR4A2_Medium | chr10   | 33176022  | 33176422  | Promoter (9-10kb) | 10      | 33179897  | 33185655  | 9233          | ENSG00000099250  | NRP1         |
| NR4A2_Medium | chr10   | 33190926  | 33191326  | Promoter (5-6kb)  | 10      | 33179897  | 33185655  | -5271         | ENSG00000099250  | NRP1         |
| NR4A2_Medium | chr10   | 34821845  | 34822245  | Promoter (6-7kb)  | 10      | 34815767  | 34816386  | 6078          | ENSG00000226386  | PARD3-AS1    |
| NR4A2_Medium | chr10   | 35065529  | 35065929  | Promoter (5-6kb)  | 10      | 35008551  | 35071339  | 5410          | ENSG00000108094  | CUL2         |
| NR4A2_Medium | chr10   | 35334707  | 35335107  | Promoter (1-2kb)  | 10      | 35336509  | 35572667  | -1402         | ENSG00000108100  | CCNY         |
| NR4A2_Medium | chr10   | 35783028  | 35783428  | Promoter (4-5kb)  | 10      | 35778302  | 35800920  | 4726          | ENSG00000280719  | PCAT5        |
| NR4A2_Medium | chr10   | 38013661  | 38014061  | Promoter (2-3kb)  | 10      | 38010699  | 38054538  | 2962          | ENSG00000189180  | ZNF33A       |
| NR4A2_Medium | chr10   | 42635564  | 42635964  | Promoter (2-3kb)  | 10      | 42631808  | 42638521  | 2557          | ENSG00000196693  | ZNF33B       |
| NR4A2_Medium | chr10   | 42874637  | 42875037  | Promoter (3-4kb)  | 10      | 42871521  | 42874060  | 3116          | ENSG00000234944  | LINC02623    |
| NR4A2_Medium | chr10   | 42997312  | 42997712  | Promoter (<=1kb)  | 10      | 42997563  | 42997681  | 0             | ENSG00000263795  | MIR5100      |
| NR4A2_Medium | chr10   | 43202570  | 43202970  | Promoter (<=1kb)  | 10      | 43199116  | 43202682  | 0             | ENSG00000198915  | RASGEF1A     |
| NR4A2_Medium | chr10   | 43392577  | 43392977  | Promoter (3-4kb)  | 10      | 43387643  | 43396817  | 3840          | ENSG00000169813  | HNRNPF       |
| NR4A2_Medium | chr10   | 43426414  | 43426814  | Promoter (8-9kb)  | 10      | 43417249  | 43417438  | -8976         | ENSG00000221400  | SNORD3J      |
| NR4A2_Medium | chr10   | 43565207  | 43565607  | Promoter (2-3kb)  | 10      | 43556344  | 43568459  | 2852          | ENSG00000196793  | ZNF239       |
| NR4A2_Medium | chr10   | 43846723  | 43847123  | Promoter (<=1kb)  | 10      | 43846415  | 43850835  | 308           | ENSG00000226808  | LINC00619    |
| NR4A2_Medium | chr10   | 44396403  | 44396803  | Promoter (9-10kb) | 10      | 44378557  | 44386493  | -9910         | ENSG00000107562  | CXCL12       |
| NR4A2_Medium | chr10   | 44894961  | 44895361  | Promoter (9-10kb) | 10      | 44827449  | 44885299  | -9662         | ENSG00000224812  | TMEM72-AS1   |
| NR4A2_Medium | chr10   | 46021505  | 46021905  | Promoter (1-2kb)  | 10      | 46005088  | 46023455  | 1550          | ENSG00000266412  | NCOA4        |
| NR4A2_Medium | chr10   | 48250243  | 48250643  | Promoter (<=1kb)  | 10      | 48248543  | 48251611  | 968           | ENSG00000170324  | FRMPD2       |
| NR4A2_Medium | chr10   | 48647355  | 48647755  | Promoter (4-5kb)  | 10      | 48582721  | 48652321  | 4566          | ENSG00000128805  | ARHGAP22     |
| NR4A2_Medium | chr10   | 48970092  | 48970492  | Promoter (1-2kb)  | 10      | 48968984  | 48976959  | 1108          | ENSG00000128815  | WDFY4        |
| NR4A2_Medium | chr10   | 59300495  | 59300895  | Promoter (1-2kb)  | 10      | 59247692  | 59302856  | 1961          | ENSG00000148541  | FAM13C       |
| NR4A2_Medium | chr10   | 59710788  | 59711188  | Promoter (<=1kb)  | 10      | 59650761  | 59710079  | -709          | ENSG00000165449  | SLC16A9      |
| NR4A2_Medium | chr10   | 61657032  | 61657432  | Promoter (5-6kb)  | 10      | 61662961  | 61766400  | -5529         | ENSG00000183346  | CABCOC01     |
| NR4A2_Medium | chr10   | 62383766  | 62384166  | Promoter (7-8kb)  | 10      | 62376194  | 62670301  | 7572          | ENSG00000138311  | ZNF365       |
| NR4A2_Medium | chr10   | 67998930  | 67999330  | Promoter (8-9kb)  | 10      | 67964792  | 67990241  | -8689         | ENSG00000148634  | HERC4        |
| NR4A2_Medium | chr10   | 68534757  | 68535157  | Promoter (7-8kb)  | 10      | 68477998  | 68527523  | -7234         | ENSG00000122912  | SLC25A16     |
| NR4A2_Medium | chr10   | 68978475  | 68978875  | Promoter (9-10kb) | 10      | 68988721  | 69016946  | -9846         | ENSG00000198954  | KIFBP        |
| NR4A2_Medium | chr10   | 69079989  | 69080389  | Promoter (7-8kb)  | 10      | 69088103  | 69104805  | -7714         | ENSG00000122862  | SRGN         |
| NR4A2_Medium | chr10   | 69081189  | 69081589  | Promoter (6-7kb)  | 10      | 69088103  | 69104805  | -6514         | ENSG00000122862  | SRGN         |
| NR4A2_Medium | chr10   | 69278556  | 69278956  | Promoter (<=1kb)  | 10      | 69278585  | 69296326  | 0             | ENSG00000156515  | HK1          |
| NR4A2_Medium | chr10   | 69306914  | 69307314  | Promoter (8-9kb)  | 10      | 69315785  | 69401443  | -8471         | ENSG00000156515  | HK1          |
| NR4A2_Medium | chr10   | 69488224  | 69488624  | Promoter (4-5kb)  | 10      | 69483868  | 69507666  | 4356          | ENSG00000099282  | TSPAN15      |
| NR4A2_Medium | chr10   | 69791720  | 69792120  | Promoter (9-10kb) | 10      | 69801867  | 69959144  | -9747         | ENSG00000197467  | COL13A1      |
| NR4A2_Medium | chr10   | 69877478  | 69877878  | Promoter (<=1kb)  | 10      | 69877296  | 69879427  | 182           | ENSG00000197467  | COL13A1      |
| NR4A2_Medium | chr10   | 70238828  | 70239228  | Promoter (4-5kb)  | 10      | 70218779  | 70233911  | -4917         | ENSG00000180817  | PPA1         |
| NR4A2_Medium | chr10   | 70438529  | 70438929  | Promoter (2-3kb)  | 10      | 70431936  | 70441681  | 2752          | ENSG00000156574  | NODAL        |
| NR4A2_Medium | chr10   | 71791731  | 71792131  | Promoter (<=1kb)  | 10      | 71790747  | 71790800  | 984           | ENSG00000274824  | MIR7152      |
| NR4A2_Medium | chr10   | 71967811  | 71968211  | Promoter (3-4kb)  | 10      | 71964395  | 72013558  | 3416          | ENSG00000122863  | CHST3        |
| NR4A2        |         |           |           |                   |         |           |           |               |                  |              |



| Condition    | peakChr | peakStart | peakEnd   | annotation        | geneChr | geneStart | geneEnd   | distanceToTSS | geneID          | geneSymbol   |
|--------------|---------|-----------|-----------|-------------------|---------|-----------|-----------|---------------|-----------------|--------------|
| NR4A2_Medium | chr10   | 75241063  | 75241463  | Promoter (2-3kb)  | 10      | 75243568  | 75361680  | -2105         | ENSG00000226051 | ZNF503-AS1   |
| NR4A2_Medium | chr10   | 75300491  | 75300891  | Promoter (3-4kb)  | 10      | 75296497  | 75360804  | 3994          | ENSG00000226051 | ZNF503-AS1   |
| NR4A2_Medium | chr10   | 77152112  | 77152512  | Promoter (3-4kb)  | 10      | 77148292  | 77150100  | 3820          | ENSG00000225497 | KCNMA1-AS2   |
| NR4A2_Medium | chr10   | 77628226  | 77628626  | Promoter (8-9kb)  | 10      | 77011994  | 77637335  | 8709          | ENSG00000156113 | KCNMA1       |
| NR4A2_Medium | chr10   | 78031862  | 78032262  | Promoter (1-2kb)  | 10      | 78033760  | 78040713  | -1498         | ENSG00000138326 | RPS24        |
| NR4A2_Medium | chr10   | 79444934  | 79445334  | Promoter (<=1kb)  | 10      | 79382325  | 79445624  | 290           | ENSG00000165424 | ZCCHC24      |
| NR4A2_Medium | chr10   | 79988152  | 79988552  | Promoter (5-6kb)  | 10      | 79941449  | 79982614  | -5538         | ENSG00000133661 | SFTPD        |
| NR4A2_Medium | chr10   | 80142746  | 80143146  | Promoter (<=1kb)  | 10      | 80144048  | 80145030  | -902          | ENSG00000189129 | PLAC9        |
| NR4A2_Medium | chr10   | 80170903  | 80171303  | Promoter (1-2kb)  | 10      | 80155124  | 80172871  | 1568          | ENSG00000122359 | ANXA11       |
| NR4A2_Medium | chr10   | 80213581  | 80213981  | Promoter (5-6kb)  | 10      | 80208209  | 80218614  | 5372          | ENSG00000237523 | LINC00857    |
| NR4A2_Medium | chr10   | 80299127  | 80299527  | Promoter (9-10kb) | 10      | 80271820  | 80289658  | -9469         | ENSG00000151224 | MAT1A        |
| NR4A2_Medium | chr10   | 80656136  | 80656536  | Promoter (6-7kb)  | 10      | 80649797  | 80653732  | 6339          | ENSG00000231082 | LINC02655    |
| NR4A2_Medium | chr10   | 80657934  | 80658334  | Promoter (8-9kb)  | 10      | 80649797  | 80653732  | 8137          | ENSG00000231082 | LINC02655    |
| NR4A2_Medium | chr10   | 80659261  | 80659661  | Promoter (9-10kb) | 10      | 80649797  | 80653732  | 9464          | ENSG00000231082 | LINC02655    |
| NR4A2_Medium | chr10   | 84186482  | 84186882  | Promoter (7-8kb)  | 10      | 84194537  | 84218694  | -7655         | ENSG00000148600 | CDHR1        |
| NR4A2_Medium | chr10   | 84187055  | 84187455  | Promoter (7-8kb)  | 10      | 84194537  | 84218694  | -7082         | ENSG00000148600 | CDHR1        |
| NR4A2_Medium | chr10   | 84255888  | 84256288  | Promoter (<=1kb)  | 10      | 84255170  | 84258915  | 718           | ENSG00000148604 | RGR          |
| NR4A2_Medium | chr10   | 84438951  | 84439351  | Promoter (<=1kb)  | 10      | 84438543  | 84513702  | 408           | ENSG00000107771 | CCSER2       |
| NR4A2_Medium | chr10   | 86373464  | 86373864  | Promoter (6-7kb)  | 10      | 85599552  | 86366795  | -6669         | ENSG00000182771 | GRID1        |
| NR4A2_Medium | chr10   | 88903898  | 88904298  | Promoter (2-3kb)  | 10      | 88901075  | 88923487  | 2823          | ENSG00000138134 | STAMBP1      |
| NR4A2_Medium | chr10   | 89472038  | 89472438  | Promoter (9-10kb) | 10      | 89462615  | 89468140  | 9423          | ENSG00000234452 | SLC16A12-AS1 |
| NR4A2_Medium | chr10   | 89561692  | 89562092  | Promoter (5-6kb)  | 10      | 89462503  | 89556641  | -5051         | ENSG00000152779 | SLC16A12     |
| NR4A2_Medium | chr10   | 91037927  | 91038327  | Promoter (4-5kb)  | 10      | 91033157  | 91062164  | 4770          | NA              | LINC00502    |
| NR4A2_Medium | chr10   | 92501661  | 92502061  | Promoter (3-4kb)  | 10      | 92451684  | 92497761  | -3900         | ENSG00000119912 | IDE          |
| NR4A2_Medium | chr10   | 93063960  | 93064360  | Promoter (<=1kb)  | 10      | 93063646  | 93077424  | 314           | ENSG00000095596 | CYP26A1      |
| NR4A2_Medium | chr10   | 94692795  | 94693195  | Promoter (4-5kb)  | 10      | 94688154  | 94853073  | 4641          | ENSG00000165841 | CYP2C19      |
| NR4A2_Medium | chr10   | 95879899  | 95880299  | Promoter (1-2kb)  | 10      | 95874028  | 95878826  | -1073         | ENSG00000226688 | ENTPD1-AS1   |
| NR4A2_Medium | chr10   | 95882282  | 95882682  | Promoter (3-4kb)  | 10      | 95874028  | 95878826  | -3456         | ENSG00000226688 | ENTPD1-AS1   |
| NR4A2_Medium | chr10   | 96304235  | 96304635  | Promoter (<=1kb)  | 10      | 96304409  | 96338562  | 0             | ENSG00000107447 | DNTT         |
| NR4A2_Medium | chr10   | 97383998  | 97384398  | Promoter (3-4kb)  | 10      | 97373061  | 97380837  | -3161         | ENSG00000052749 | RRP12        |
| NR4A2_Medium | chr10   | 97454569  | 97454969  | Promoter (<=1kb)  | 10      | 97455717  | 97456428  | -748          | ENSG00000171307 | ZDHHC16      |
| NR4A2_Medium | chr10   | 97562860  | 97563260  | Promoter (9-10kb) | 10      | 97572499  | 97583882  | -9239         | ENSG00000165887 | ANKRD2       |
| NR4A2_Medium | chr10   | 97581540  | 97581940  | Promoter (2-3kb)  | 10      | 97584323  | 97600948  | -2383         | ENSG00000241935 | HOGA1        |
| NR4A2_Medium | chr10   | 97857868  | 97858268  | Promoter (1-2kb)  | 10      | 97859449  | 97871577  | -1181         | ENSG00000155265 | GOLGA7B      |
| NR4A2_Medium | chr10   | 98385889  | 98386289  | Promoter (2-3kb)  | 10      | 98387201  | 98388436  | 2147          | ENSG00000119943 | PYROXD2      |
| NR4A2_Medium | chr10   | 98408996  | 98409396  | Promoter (2-3kb)  | 10      | 98383565  | 98411877  | 2481          | ENSG00000119943 | PYROXD2      |
| NR4A2_Medium | chr10   | 99622802  | 99623202  | Promoter (2-3kb)  | 10      | 99610986  | 99620609  | -2193         | ENSG00000155287 | SLC25A28     |
| NR4A2_Medium | chr10   | 100238715 | 100239115 | Promoter (1-2kb)  | 10      | 100237156 | 100237302 | -1413         | ENSG00000212464 | SNORA12      |
| NR4A2_Medium | chr10   | 100259085 | 100259485 | Promoter (4-5kb)  | 10      | 100232305 | 100254619 | -4466         | ENSG00000095485 | CWF19L1      |
| NR4A2_Medium | chr10   | 101143864 | 101144264 | Promoter (9-10kb) | 10      | 101134314 | 101135516 | 9550          | ENSG00000107807 | TLX1         |
| NR4A2_Medium | chr10   | 101223256 | 101223656 | Promoter (5-6kb)  | 10      | 101229577 | 101240838 | -5921         | NA              | LBX1-AS1     |
| NR4A2_Medium | chr10   | 101603534 | 101603934 | Promoter (2-3kb)  | 10      | 101601417 | 101601497 | -2037         | ENSG00000283558 | MIR3158-2    |
| NR4A2_Medium | chr10   | 101823393 | 101823793 | Promoter (4-5kb)  | 10      | 101826973 | 101827955 | 4162          | ENSG00000120049 | KCNIP2       |
| NR4A2_Medium | chr10   | 101826087 | 101826487 | Promoter (1-2kb)  | 10      | 101826973 | 101827955 | 1468          | ENSG00000120049 | KCNIP2       |
| NR4A2_Medium | chr10   | 101993445 | 101993845 | Promoter (8-9kb)  | 10      | 101990551 | 102002064 | 8219          | ENSG00000120029 | ARMH3        |
| NR4A2_Medium | chr10   | 102043288 | 102043688 | Promoter (9-10kb) | 10      | 102029448 | 102033438 | -9850         | ENSG00000120029 | ARMH3        |
| NR4A2_Medium | chr10   | 102051060 | 102051460 | Promoter (4-5kb)  | 10      | 101845599 | 102056173 | 4713          | ENSG00000120029 | ARMH3        |
| NR4A2_Medium | chr10   | 102705739 | 102706139 | Promoter (8-9kb)  | 10      | 102673731 | 102714397 | 8258          | ENSG00000138175 | ARL3         |
| NR4A2_Medium | chr10   | 102716329 | 102716729 | Promoter (1-2kb)  | 10      | 102714659 | 102729506 | 1670          | ENSG00000156398 | SFXN2        |
| NR4A2_Medium | chr10   | 102831659 | 102832059 | Promoter (<=1kb)  | 10      | 102830948 | 102831703 | 0             | ENSG00000148795 | CYP17A1      |
| NR4A2_Medium | chr10   | 103187015 | 103187415 | Promoter (5-6kb)  | 10      | 103169284 | 103181320 | -5695         | ENSG00000076685 | NT5C2        |
| NR4A2_Medium | chr10   | 103285997 | 103286397 | Promoter (8-9kb)  | 10      | 103277138 | 103290346 | 8859          | ENSG00000148798 | INA          |
| NR4A2_Medium | chr10   | 103339782 | 103340182 | Promoter (8-9kb)  | 10      | 103348355 | 103348939 | 8757          | ENSG00000156374 | PCGF6        |
| NR4A2_Medium | chr10   | 103398616 | 103399016 | Promoter (1-2kb)  | 10      | 103396650 | 103405075 | 1966          | ENSG00000148843 | PDCD11       |
| NR4A2_Medium | chr10   | 103524251 | 103524651 | Promoter (6-7kb)  | 10      | 103479603 | 103517393 | -6858         | ENSG00000235470 | NEURL1-AS1   |
| NR4A2_Medium | chr10   | 103570371 | 103570771 | Promoter (<=1kb)  | 10      | 103571677 | 103577902 | -906          | ENSG00000107954 | NEURL1       |
| NR4A2_Medium | chr10   | 103691819 | 103692219 | Promoter (1-2kb)  | 10      | 103599520 | 103693623 | 1404          | ENSG00000107957 | SH3PXD2A     |
| NR4A2_Medium | chr10   | 103701470 | 103701870 | Promoter (7-8kb)  | 10      | 103599520 | 103693623 | -7847         | ENSG00000107957 | SH3PXD2A     |
| NR4A2_Medium | chr10   | 104035932 | 104036332 | Promoter (1-2kb)  | 10      | 104031350 | 104034130 | -1802         | ENSG00000065618 | COL17A1      |
| NR4A2_Medium | chr10   | 104216885 | 104217285 | Promoter (1-2kb)  | 10      | 104218789 | 104218883 | 1598          | ENSG00000208033 | MIR609       |
| NR4A2_Medium | chr10   | 104336207 | 104336607 | Promoter (1-2kb)  | 10      | 104312157 | 104338448 | 1841          | ENSG00000148841 | ITPRIP       |
| NR4A2_Medium | chr10   | 104630894 | 104631294 | Promoter (9-10kb) | 10      | 104641290 | 105265242 | -9996         | ENSG00000156395 | SORCS3       |
| NR4A2_Medium | chr10   | 109872412 | 109872812 | Promoter (1-2kb)  | 10      | 109868636 | 109871032 | -1380         | ENSG00000108039 | XPNPEP1      |
| NR4A2_Medium | chr10   | 110014088 | 110014488 | Promoter (1-2kb)  | 10      | 110016435 | 110117402 | -1947         | ENSG00000148700 | ADD3         |
| NR4A2_Medium | chr10   | 110080725 | 110081125 | Promoter (1-2kb)  | 10      | 110079239 | 110124143 | 1486          | ENSG00000148700 | ADD3         |
| NR4A2_Medium | chr10   | 110130715 | 110131115 | Promoter (4-5kb)  | 10      | 110125902 | 110132727 | 4813          | ENSG00000148700 | ADD3         |
| NR4A2_Medium | chr10   | 110295712 | 110296112 | Promoter (8-9kb)  | 10      | 110298677 | 110304131 | 8019          | ENSG00000119953 | SMNDC1       |
| NR4A2_Medium | chr10   | 112422634 | 112423034 | Promoter (<=1kb)  | 10      | 112421981 | 112426608 | 653           | ENSG00000197142 | ACSL5        |
| NR4A2_Medium | chr10   | 114034953 | 114035353 | Promoter (8-9kb)  | 10      | 114043866 | 114046904 | -8513         | ENSG00000043591 | ADRB1        |
| NR4A2_Medium | chr10   | 114755562 | 114755962 | Promoter (8-9kb)  | 10      | 114764788 | 114779903 | -8826         | ENSG00000228484 | LOC101927692 |
| NR4A2_Medium | chr10   | 115004443 | 115004843 | Promoter (9-10kb) | 10      | 114994657 | 114996593 | 9786          | ENSG00000236799 | LINC02626    |
| NR4A2_Medium | chr10   | 116705824 | 116706224 | Promoter (2-3kb)  | 10      | 116700954 | 116708246 | 2022          | ENSG00000165868 | HSPA12A      |
| NR4A2_Medium | chr10   | 116714513 | 116714913 | Promoter (6-7kb)  | 10      | 116700954 | 116708246 | -6267         | ENSG00000165868 | HSPA12A      |
| NR4A2_Medium | chr10   | 118745521 | 118745921 | Promoter (8-9kb)  | 10      | 118729175 | 118754477 | 8556          | ENSG00000151893 | CACUL1       |
| NR4A2_Medium | chr10   | 119085769 | 119086169 | Promoter (4-5kb)  | 10      | 119035793 | 119080823 | -4946         | ENSG00000107581 | EIF3A        |
| NR4A2_Medium | chr10   | 119379374 | 119379774 | Promoter (1-2kb)  | 10      | 119377972 | 119378043 | 1402          | ENSG00000265719 | MIR4681      |
| NR4A2_Medium | chr10   | 120358177 | 120358577 | Promoter (2-3kb)  | 10      | 120354701 | 120355183 | -2994         | ENSG00000122026 | RPL21        |
| NR4A2_Medium | chr10   | 120454678 | 120455078 | Promoter (1-2kb)  | 10      | 120456954 | 120589855 | -1876         | ENSG00000203805 | PLPP4        |
| NR4A2_Medium | chr10   | 122644054 | 122644454 | Promoter (8-9kb)  | 10      | 122635100 | 122643557 | 8954          | ENSG00000187908 | DMBT1        |
| NR4A2_Medium | chr10   | 122724934 | 122725334 | Promoter (4-5kb)  | 10      | 122729429 | 122826448 | -4095         | ENSG00000176584 | DMBT1L1      |
| NR4A2_Medium | chr10   | 123148007 | 123148407 | Promoter (<=1kb)  | 10      | 123148122 | 123150672 | 0             | ENSG00000188816 | HMX2         |
| NR4A2_Medium | chr10   | 123935839 | 123936239 | Promoter (4-5kb)  | 10      | 123706207 | 123940267 | 4028          | ENSG00000121898 | CPXM2        |
| NR4A2_Medium | chr10   | 124412965 | 124413365 | Promoter (1-2kb)  | 10      | 124408893 | 124414436 | 1071          | ENSG00000065154 | OAT          |
| NR4A2_Medium | chr10   | 124598893 | 124599293 | Promoter (5-6kb)  | 10      | 124605200 | 124613425 | -5907         | ENSG00000107902 | LHPP         |
| NR4A2_Medium | chr10   | 125032622 | 125033022 | Promoter (<=1kb)  | 10      | 125032783 | 125032870 | 0             | ENSG00000264572 | MIR4296      |
| NR4A2_Medium | chr10   | 125717214 | 125717614 | Promoter (1-2kb)  | 10      | 125709006 | 125719448 | 1834          | ENSG00000224023 | EDRF1-DT     |
| NR4A2_Medium | chr10   | 127554592 | 127554992 | Promoter (5-6kb)  | 10      | 127549369 | 127552639 | 5223          | ENSG00000214285 | NPS          |
| NR4A2_Medium | chr10   | 131890373 | 131891149 | Promoter (9-10kb) | 10      | 131901008 | 131959834 | -9859         | ENSG00000175470 | PPP2R2D      |
| NR4A2_Medium | chr10   | 132159063 | 132159463 | Promoter (2-3kb)  | 10      | 132161783 | 132163383 | -2320         | ENSG00000188385 | JAKMIP3      |
| NR4A2_Medium | chr10   | 132364276 | 132364676 | Promoter (<=1kb)  | 10      | 132365471 | 132367001 | -795          | ENSG00000148814 | LRRC27       |
| NR4A2_Medium | chr10   | 132392347 | 132392747 | Promoter (4-5kb)  | 10      | 132397168 | 132417528 | -4421         | ENSG00000171813 | PWWP2B       |
| NR4A2_Medium | chr10   | 132534095 | 132534495 | Promoter (3-4kb)  | 10      | 132537787 | 132783480 | -3292         | ENSG00000068383 | INPP         |

| Condition    | peakChr | peakStart | peakEnd  | annotation        | geneChr | geneStart | geneEnd  | distanceToTSS | geneID          | geneSymbol   |
|--------------|---------|-----------|----------|-------------------|---------|-----------|----------|---------------|-----------------|--------------|
| NR4A2_Medium | chr11   | 218623    | 219023   | Promoter (5-6kb)  | 11      | 213449    | 214556   | 5174          | ENSG00000177963 | RIC8A        |
| NR4A2_Medium | chr11   | 791113    | 791513   | Promoter (<=1kb)  | 11      | 788178    | 790113   | -1000         | ENSG00000184524 | CEND1        |
| NR4A2_Medium | chr11   | 1408562   | 1408962  | Promoter (<=1kb)  | 11      | 1409400   | 1442516  | -438          | ENSG00000174672 | BRSK2        |
| NR4A2_Medium | chr11   | 1469028   | 1469428  | Promoter (4-5kb)  | 11      | 1469457   | 1473436  | 4008          | ENSG00000182208 | MOB2         |
| NR4A2_Medium | chr11   | 1742912   | 1743312  | Promoter (5-6kb)  | 11      | 1735213   | 1749102  | 5790          | ENSG00000244242 | IFITM10      |
| NR4A2_Medium | chr11   | 1749857   | 1750257  | Promoter (<=1kb)  | 11      | 1732410   | 1750580  | 323           | ENSG00000244242 | IFITM10      |
| NR4A2_Medium | chr11   | 1754313   | 1754713  | Promoter (<=1kb)  | 11      | 1753383   | 1754946  | 233           | ENSG00000117984 | CTSD         |
| NR4A2_Medium | chr11   | 1772817   | 1773217  | Promoter (8-9kb)  | 11      | 1759052   | 1764573  | -8244         | ENSG00000117984 | CTSD         |
| NR4A2_Medium | chr11   | 2126509   | 2127284  | Promoter (6-7kb)  | 11      | 2134134   | 2134209  | 6925          | ENSG00000207805 | MIR483       |
| NR4A2_Medium | chr11   | 2408469   | 2408869  | Promoter (6-7kb)  | 11      | 2402293   | 2403875  | 6176          | ENSG00000184281 | TSSC4        |
| NR4A2_Medium | chr11   | 2430538   | 2430938  | Promoter (7-8kb)  | 11      | 2404515   | 2423045  | -7493         | ENSG00000070985 | TRPM5        |
| NR4A2_Medium | chr11   | 4085684   | 4086084  | Promoter (<=1kb)  | 11      | 4086205   | 4091966  | -121          | ENSG00000167323 | STIM1        |
| NR4A2_Medium | chr11   | 5250489   | 5250889  | Promoter (<=1kb)  | 11      | 5248079   | 5249859  | -630          | ENSG00000213934 | HBG1         |
| NR4A2_Medium | chr11   | 5258772   | 5259172  | Promoter (3-4kb)  | 11      | 5248270   | 5254783  | -3989         | ENSG00000196565 | HBG2         |
| NR4A2_Medium | chr11   | 5441403   | 5441803  | Promoter (<=1kb)  | 11      | 5440570   | 5441514  | 0             | ENSG00000167359 | OR5111       |
| NR4A2_Medium | chr11   | 5486531   | 5486931  | Promoter (1-2kb)  | 11      | 5488685   | 5489749  | -1754         | ENSG00000181609 | OR52D1       |
| NR4A2_Medium | chr11   | 5537268   | 5537668  | Promoter (7-8kb)  | 11      | 5544489   | 5545549  | 7881          | ENSG00000181616 | OR52H1       |
| NR4A2_Medium | chr11   | 5821712   | 5822112  | Promoter (1-2kb)  | 11      | 5820314   | 5821348  | 1398          | ENSG00000180988 | OR52N2       |
| NR4A2_Medium | chr11   | 5833221   | 5833621  | Promoter (8-9kb)  | 11      | 5840928   | 5841897  | 8276          | ENSG00000205409 | OR52E6       |
| NR4A2_Medium | chr11   | 5994681   | 5995081  | Promoter (7-8kb)  | 11      | 5985892   | 5986985  | -7696         | ENSG00000183313 | OR52L1       |
| NR4A2_Medium | chr11   | 6386330   | 6386730  | Promoter (3-4kb)  | 11      | 6390473   | 6394991  | -3743         | ENSG00000166311 | SMPD1        |
| NR4A2_Medium | chr11   | 6534727   | 6535127  | Promoter (<=1kb)  | 11      | 6533924   | 6549035  | 803           | ENSG00000179532 | DNHD1        |
| NR4A2_Medium | chr11   | 6656059   | 6656459  | Promoter (<=1kb)  | 11      | 6621330   | 6655809  | -250          | ENSG00000166341 | DCHS1        |
| NR4A2_Medium | chr11   | 6664135   | 6664535  | Promoter (8-9kb)  | 11      | 6621330   | 6655809  | -8326         | ENSG00000166341 | DCHS1        |
| NR4A2_Medium | chr11   | 7663958   | 7664358  | Promoter (2-3kb)  | 11      | 7665282   | 7666684  | 2326          | ENSG00000166394 | CYB5R2       |
| NR4A2_Medium | chr11   | 8643281   | 8643771  | Promoter (4-5kb)  | 11      | 8645722   | 8648066  | 4295          | ENSG00000166436 | TRIM66       |
| NR4A2_Medium | chr11   | 8650870   | 8651270  | Promoter (2-3kb)  | 11      | 8645722   | 8648066  | -2804         | ENSG00000166436 | TRIM66       |
| NR4A2_Medium | chr11   | 8660429   | 8660829  | Promoter (1-2kb)  | 11      | 8615539   | 8658836  | -1593         | ENSG00000166436 | TRIM66       |
| NR4A2_Medium | chr11   | 8763067   | 8763467  | Promoter (3-4kb)  | 11      | 8730305   | 8766670  | 3203          | ENSG00000166444 | DENND2B      |
| NR4A2_Medium | chr11   | 8801380   | 8801780  | Promoter (6-7kb)  | 11      | 8715781   | 8794842  | -6538         | ENSG00000166444 | DENND2B      |
| NR4A2_Medium | chr11   | 8828767   | 8829167  | Promoter (2-3kb)  | 11      | 8731133   | 8831939  | 2772          | ENSG00000166444 | DENND2B      |
| NR4A2_Medium | chr11   | 9180771   | 9181171  | Promoter (1-2kb)  | 11      | 9177930   | 9178949  | -1822         | ENSG00000184014 | DENND5A      |
| NR4A2_Medium | chr11   | 9455525   | 9455925  | Promoter (4-5kb)  | 11      | 9460319   | 9478424  | -4394         | ENSG00000166478 | ZNF143       |
| NR4A2_Medium | chr11   | 9655511   | 9655911  | Promoter (8-9kb)  | 11      | 9664077   | 9751821  | -8166         | ENSG00000133789 | SWAP70       |
| NR4A2_Medium | chr11   | 9723746   | 9724146  | Promoter (2-3kb)  | 11      | 9726895   | 9750491  | -2749         | ENSG00000133789 | SWAP70       |
| NR4A2_Medium | chr11   | 10291099  | 10291499 | Promoter (2-3kb)  | 11      | 9778667   | 10294207 | 2708          | ENSG00000133812 | SBF2         |
| NR4A2_Medium | chr11   | 10658520  | 10658920 | Promoter (6-7kb)  | 11      | 10576324  | 10652376 | -6144         | ENSG00000072952 | IRAG1        |
| NR4A2_Medium | chr11   | 10812479  | 10812879 | Promoter (3-4kb)  | 11      | 10809204  | 10822931 | 3275          | ENSG00000246308 | LOC101928053 |
| NR4A2_Medium | chr11   | 11621640  | 11622040 | Promoter (<=1kb)  | 11      | 11270877  | 11622005 | 0             | ENSG00000110328 | GALNT18      |
| NR4A2_Medium | chr11   | 12130108  | 12130508 | Promoter (7-8kb)  | 11      | 12138388  | 12262919 | -7880         | ENSG00000133816 | MICAL2       |
| NR4A2_Medium | chr11   | 12204255  | 12204655 | Promoter (3-4kb)  | 11      | 12207725  | 12263785 | -3070         | ENSG00000133816 | MICAL2       |
| NR4A2_Medium | chr11   | 12287577  | 12287977 | Promoter (<=1kb)  | 11      | 12286900  | 12359144 | 677           | ENSG00000133816 | MICALCL      |
| NR4A2_Medium | chr11   | 12889290  | 12889690 | Promoter (9-10kb) | 11      | 12879443  | 12944483 | 9847          | ENSG00000187079 | TEAD1        |
| NR4A2_Medium | chr11   | 14348973  | 14349373 | Promoter (5-6kb)  | 11      | 14278939  | 14354500 | 5127          | ENSG00000133818 | RRAS2        |
| NR4A2_Medium | chr11   | 14372904  | 14373304 | Promoter (8-9kb)  | 11      | 14278682  | 14364506 | -8398         | ENSG00000133818 | RRAS2        |
| NR4A2_Medium | chr11   | 14878071  | 14878471 | Promoter (7-8kb)  | 11      | 14878012  | 14885841 | 7370          | ENSG00000186104 | CYP2R1       |
| NR4A2_Medium | chr11   | 15147446  | 15147846 | Promoter (1-2kb)  | 11      | 15149102  | 15246526 | -1256         | ENSG00000188487 | INSC         |
| NR4A2_Medium | chr11   | 16483161  | 16483561 | Promoter (6-7kb)  | 11      | 15966449  | 16476388 | -6773         | ENSG00000110693 | SOX6         |
| NR4A2_Medium | chr11   | 17010153  | 17010553 | Promoter (2-3kb)  | 11      | 16854894  | 17013342 | 2789          | ENSG00000166689 | PLEKHA7      |
| NR4A2_Medium | chr11   | 17046484  | 17046884 | Promoter (5-6kb)  | 11      | 17052025  | 17053024 | -5141         | ENSG00000184669 | OR7E14P      |
| NR4A2_Medium | chr11   | 17289842  | 17290242 | Promoter (5-6kb)  | 11      | 17295322  | 17331523 | -5080         | ENSG00000070081 | NUCB2        |
| NR4A2_Medium | chr11   | 17438233  | 17438633 | Promoter (4-5kb)  | 11      | 17430597  | 17442791 | 4158          | ENSG00000006071 | ABCC8        |
| NR4A2_Medium | chr11   | 17494577  | 17494977 | Promoter (1-2kb)  | 11      | 17494162  | 17496913 | 1936          | ENSG00000006611 | USH1C        |
| NR4A2_Medium | chr11   | 17544638  | 17545038 | Promoter (<=1kb)  | 11      | 17493900  | 17544416 | -222          | ENSG00000006611 | USH1C        |
| NR4A2_Medium | chr11   | 17782526  | 17782926 | Promoter (3-4kb)  | 11      | 17779172  | 17783055 | 3354          | ENSG00000129159 | KCNC1        |
| NR4A2_Medium | chr11   | 18016032  | 18016432 | Promoter (2-3kb)  | 11      | 17788048  | 18013047 | -2985         | ENSG00000129158 | SERGEF       |
| NR4A2_Medium | chr11   | 18111278  | 18111678 | Promoter (4-5kb)  | 11      | 18112472  | 18116132 | 4454          | ENSG00000166787 | SAA3P        |
| NR4A2_Medium | chr11   | 18235654  | 18236054 | Promoter (<=1kb)  | 11      | 18231355  | 18236802 | 748           | ENSG00000148965 | SAA4         |
| NR4A2_Medium | chr11   | 18707479  | 18707879 | Promoter (1-2kb)  | 11      | 18705418  | 18706129 | -1350         | ENSG00000179057 | IGSF22       |
| NR4A2_Medium | chr11   | 18802214  | 18802614 | Promoter (9-10kb) | 11      | 18727930  | 18792721 | -9493         | ENSG00000110786 | PTPN5        |
| NR4A2_Medium | chr11   | 19209010  | 19209410 | Promoter (1-2kb)  | 11      | 19182037  | 19210571 | 1161          | ENSG00000129170 | CSRP3        |
| NR4A2_Medium | chr11   | 20045127  | 20045527 | Promoter (3-4kb)  | 11      | 20043846  | 20049303 | 3776          | ENSG00000254453 | NAV2-AS2     |
| NR4A2_Medium | chr11   | 20096998  | 20097398 | Promoter (6-7kb)  | 11      | 20104211  | 20118581 | -6813         | ENSG00000166833 | NAV2         |
| NR4A2_Medium | chr11   | 21287512  | 21287912 | Promoter (3-4kb)  | 11      | 21283737  | 21504199 | 3775          | ENSG00000165973 | NELL1        |
| NR4A2_Medium | chr11   | 22631041  | 22631441 | Promoter (5-6kb)  | 11      | 22622890  | 22625841 | -5200         | ENSG00000183161 | FANCF        |
| NR4A2_Medium | chr11   | 22672471  | 22672871 | Promoter (<=1kb)  | 11      | 22672577  | 22737760 | 0             | ENSG00000148935 | GAS2         |
| NR4A2_Medium | chr11   | 27366824  | 27367224 | Promoter (3-4kb)  | 11      | 27348869  | 27363234 | -3590         | ENSG00000109881 | CCDC34       |
| NR4A2_Medium | chr11   | 28117852  | 28118252 | Promoter (7-8kb)  | 11      | 28110315  | 28164136 | 7537          | ENSG00000169519 | METTL15      |
| NR4A2_Medium | chr11   | 29591939  | 29592339 | Promoter (1-2kb)  | 11      | 29594326  | 29631509 | -1987         | ENSG00000255117 | LINC02546    |
| NR4A2_Medium | chr11   | 30012174  | 30012574 | Promoter (3-4kb)  | 11      | 30012939  | 30016359 | 3785          | ENSG00000182255 | KCNA4        |
| NR4A2_Medium | chr11   | 30016414  | 30016814 | Promoter (<=1kb)  | 11      | 30012939  | 30016359 | -55           | ENSG00000182255 | KCNA4        |
| NR4A2_Medium | chr11   | 31807110  | 31807510 | Promoter (<=1kb)  | 11      | 31801742  | 31807619 | 109           | ENSG00000007372 | PAX6         |
| NR4A2_Medium | chr11   | 31808582  | 31808982 | Promoter (<=1kb)  | 11      | 31790791  | 31808802 | 0             | ENSG00000007372 | PAX6         |
| NR4A2_Medium | chr11   | 32402034  | 32402434 | Promoter (1-2kb)  | 11      | 32389092  | 32400615 | -1419         | ENSG00000184937 | WT1          |
| NR4A2_Medium | chr11   | 32640955  | 32641355 | Promoter (5-6kb)  | 11      | 32602725  | 32635832 | -5123         | ENSG00000186714 | CCDC73       |
| NR4A2_Medium | chr11   | 33079073  | 33079473 | Promoter (2-3kb)  | 11      | 33076149  | 33079454 | 2924          | ENSG00000280798 | LINC00294    |
| NR4A2_Medium | chr11   | 35171139  | 35171539 | Promoter (5-6kb)  | 11      | 35176575  | 35214861 | -5036         | ENSG0000026508  | CD44         |
| NR4A2_Medium | chr11   | 35657347  | 35657747 | Promoter (5-6kb)  | 11      | 35662775  | 35818007 | -5028         | ENSG00000166326 | TRIM44       |
| NR4A2_Medium | chr11   | 36010749  | 36011149 | Promoter (<=1kb)  | 11      | 36010098  | 36010204 | 651           | ENSG00000263389 | MIR3973      |
| NR4A2_Medium | chr11   | 36168029  | 36168429 | Promoter (4-5kb)  | 11      | 36163299  | 36227429 | 4730          | ENSG00000179241 | LDLRAD3      |
| NR4A2_Medium | chr11   | 43303164  | 43303564 | Promoter (8-9kb)  | 11      | 43311963  | 43342676 | -8399         | ENSG00000166181 | API5         |
| NR4A2_Medium | chr11   | 43590234  | 43590634 | Promoter (8-9kb)  | 11      | 43581394  | 43581483 | 8840          | ENSG00000199077 | MIR129-2     |
| NR4A2_Medium | chr11   | 43825352  | 43825752 | Promoter (4-5kb)  | 11      | 43830063  | 43856404 | -4311         | ENSG00000149084 | HSD17B12     |
| NR4A2_Medium | chr11   | 44051620  | 44052020 | Promoter (3-4kb)  | 11      | 44048015  | 44059950 | 3605          | ENSG00000205126 | ACCSL        |
| NR4A2_Medium | chr11   | 44596119  | 44596519 | Promoter (<=1kb)  | 11      | 44596856  | 44618253 | -337          | ENSG00000085117 | CD82         |
| NR4A2_Medium | chr11   | 44721119  | 44721519 | Promoter (4-5kb)  | 11      | 44726465  | 44919318 | -4946         | ENSG00000157570 | TSPAN18      |
| NR4A2_Medium | chr11   | 44943632  | 44944032 | Promoter (<=1kb)  | 11      | 44936843  | 44943191 | -441          | ENSG00000175274 | TP53I11      |
| NR4A2_Medium | chr11   | 44963513  | 44963913 | Promoter (9-10kb) | 11      | 44973770  | 44978028 | -9857         | ENSG00000254654 | LINC02685    |
| NR4A2_Medium | chr11   | 44974606  | 44975006 | Promoter (<=1kb)  | 11      | 44974143  | 44974905 | 463           | ENSG00000254654 | LINC02685    |
| NR4A2_Medium | chr11   | 45730351  | 45730751 | Promoter (6-7kb)  | 11      | 45723515  | 45736285 | 6836          | ENSG00000254519 | LOC100507384 |
| NR4A2_Medium | chr11   | 45859790  | 45860190 | Promoter (<=1kb)  | 11      | 45860980  | 45867940 | -790          | ENSG00000121671 | CRY2         |
| NR4A2_Medium | chr11   | 46351105  | 46351505 | Promoter (3-4kb)  | 11      | 46347588  | 46380367 | 3517          | ENSG00000149091 | DGKZ         |
| NR4A2_Medium | chr11   | 46637527  | 46637927 | Promoter (6-7kb)  | 11      | 46644337  | 46656398 | -6410         | ENSG00000175224 | ATG13        |
| NR4A2_Medium | chr11   | 46657673  | 46658073 | Promoter (<=1kb)  | 11      | 46657060  | 46659402 | 613           | ENSG00000175224 | ATG13        |
| NR4A2_Medium | chr11   | 46723577  | 46723977 | Promoter (<=1kb)  | 11      | 46723180  | 46726064 | 397           | ENSG00000180210 |              |



| Condition    | peakChr | peakStart | peakEnd  | annotation        | geneChr | geneStart | geneEnd  | distanceToTSS | geneID          | geneSymbol   |
|--------------|---------|-----------|----------|-------------------|---------|-----------|----------|---------------|-----------------|--------------|
| NR4A2_Medium | chr11   | 57796079  | 57796479 | Promoter (4-5kb)  | 11      | 57791559  | 57801794 | 4520          | ENSG00000288534 | TMX2-CTNND1  |
| NR4A2_Medium | chr11   | 58567838  | 58568238 | Promoter (7-8kb)  | 11      | 58526871  | 58575836 | 7598          | ENSG00000110031 | LPXN         |
| NR4A2_Medium | chr11   | 58934110  | 58934510 | Promoter (4-5kb)  | 11      | 58939448  | 58947949 | -4938         | ENSG00000166840 | GLYATL1      |
| NR4A2_Medium | chr11   | 59422140  | 59422540 | Promoter (3-4kb)  | 11      | 59416969  | 59426412 | 3872          | ENSG00000172324 | OR5A2        |
| NR4A2_Medium | chr11   | 59504624  | 59505024 | Promoter (1-2kb)  | 11      | 59503576  | 59504511 | 1048          | ENSG00000176200 | OR4D11       |
| NR4A2_Medium | chr11   | 59605902  | 59606302 | Promoter (5-6kb)  | 11      | 59576833  | 59600856 | -5046         | ENSG00000110048 | OSBP         |
| NR4A2_Medium | chr11   | 59765012  | 59765412 | Promoter (9-10kb) | 11      | 59755459  | 59789201 | 9553          | ENSG00000166900 | STX3         |
| NR4A2_Medium | chr11   | 59849409  | 59849809 | Promoter (3-4kb)  | 11      | 59842467  | 59845499 | -3910         | ENSG00000134812 | CBLIF        |
| NR4A2_Medium | chr11   | 60391588  | 60391988 | Promoter (2-3kb)  | 11      | 60389182  | 60393977 | 2406          | ENSG00000166927 | MS4A7        |
| NR4A2_Medium | chr11   | 60457550  | 60457950 | Promoter (1-2kb)  | 11      | 60455859  | 60465944 | 1691          | ENSG00000156738 | MS4A1        |
| NR4A2_Medium | chr11   | 61491939  | 61492339 | Promoter (2-3kb)  | 11      | 61489038  | 61490927 | 2901          | ENSG00000162148 | PPP1R32      |
| NR4A2_Medium | chr11   | 61496970  | 61497370 | Promoter (7-8kb)  | 11      | 61489038  | 61490927 | 7932          | ENSG00000162148 | PPP1R32      |
| NR4A2_Medium | chr11   | 61774420  | 61774820 | Promoter (2-3kb)  | 11      | 61777606  | 61786417 | -2786         | ENSG00000124920 | MYRF         |
| NR4A2_Medium | chr11   | 62138378  | 62138778 | Promoter (7-8kb)  | 11      | 62130559  | 62141745 | 7819          | ENSG00000149503 | INCENP       |
| NR4A2_Medium | chr11   | 62383968  | 62384368 | Promoter (7-8kb)  | 11      | 62391498  | 62392585 | -7130         | ENSG00000162174 | ASRGL1       |
| NR4A2_Medium | chr11   | 62884733  | 62885133 | Promoter (<=1kb)  | 11      | 62885177  | 62888860 | -44           | ENSG00000168003 | SLC3A2       |
| NR4A2_Medium | chr11   | 63619047  | 63619447 | Promoter (2-3kb)  | 11      | 63590339  | 63616883 | -2164         | ENSG00000176485 | PLAAT3       |
| NR4A2_Medium | chr11   | 63771789  | 63772189 | Promoter (3-4kb)  | 11      | 63759892  | 63768775 | -3014         | ENSG00000188070 | C11orf95     |
| NR4A2_Medium | chr11   | 63922375  | 63922775 | Promoter (5-6kb)  | 11      | 63911230  | 63917164 | -5211         | ENSG00000167771 | RCOR2        |
| NR4A2_Medium | chr11   | 63969178  | 63969578 | Promoter (5-6kb)  | 11      | 63974620  | 63976543 | -5042         | ENSG00000176340 | COX8A        |
| NR4A2_Medium | chr11   | 63979669  | 63980069 | Promoter (5-6kb)  | 11      | 63974620  | 63988346 | 5049          | ENSG00000167770 | OTUB1        |
| NR4A2_Medium | chr11   | 63980684  | 63981084 | Promoter (4-5kb)  | 11      | 63985853  | 63998411 | -4769         | ENSG00000167770 | OTUB1        |
| NR4A2_Medium | chr11   | 64133466  | 64133866 | Promoter (6-7kb)  | 11      | 63999383  | 64126934 | -6532         | ENSG00000133315 | MACROD1      |
| NR4A2_Medium | chr11   | 64633689  | 64634089 | Promoter (3-4kb)  | 11      | 64630405  | 64637445 | 3356          | ENSG00000110076 | NRXN2        |
| NR4A2_Medium | chr11   | 64724924  | 64725324 | Promoter (1-2kb)  | 11      | 64606176  | 64723188 | -1736         | ENSG00000110076 | NRXN2        |
| NR4A2_Medium | chr11   | 64733194  | 64733594 | Promoter (1-2kb)  | 11      | 64726946  | 64735266 | 1672          | ENSG00000068831 | RASGRP2      |
| NR4A2_Medium | chr11   | 64900802  | 64901202 | Promoter (1-2kb)  | 11      | 64902387  | 64902455 | 1253          | ENSG00000274314 | MIR6749      |
| NR4A2_Medium | chr11   | 64992326  | 64992726 | Promoter (2-3kb)  | 11      | 64988784  | 64990274 | -2052         | ENSG00000168062 | BATF2        |
| NR4A2_Medium | chr11   | 65040227  | 65040627 | Promoter (<=1kb)  | 11      | 65040901  | 65044799 | -274          | ENSG00000168061 | SAC3D1       |
| NR4A2_Medium | chr11   | 65489832  | 65490232 | Promoter (7-8kb)  | 11      | 65497688  | 65506431 | -7456         | ENSG00000251562 | MALAT1       |
| NR4A2_Medium | chr11   | 65643407  | 65643807 | Promoter (1-2kb)  | 11      | 65642118  | 65642553 | 1289          | ENSG00000213445 | SIPA1        |
| NR4A2_Medium | chr11   | 65657012  | 65657412 | Promoter (2-3kb)  | 11      | 65655707  | 65659743 | 2331          | ENSG00000173039 | RELA         |
| NR4A2_Medium | chr11   | 65772161  | 65772561 | Promoter (8-9kb)  | 11      | 65773898  | 65780976 | 8415          | ENSG00000254470 | AP5B1        |
| NR4A2_Medium | chr11   | 65862005  | 65862405 | Promoter (<=1kb)  | 11      | 65855358  | 65862026 | 0             | ENSG00000172757 | CFL1         |
| NR4A2_Medium | chr11   | 65868451  | 65868851 | Promoter (<=1kb)  | 11      | 65866825  | 65868512 | 0             | ENSG00000172638 | EFEMP2       |
| NR4A2_Medium | chr11   | 65882819  | 65883219 | Promoter (2-3kb)  | 11      | 65883741  | 65885572 | 2353          | ENSG00000172500 | FIBP         |
| NR4A2_Medium | chr11   | 66099728  | 66100128 | Promoter (<=1kb)  | 11      | 66100763  | 66216250 | -635          | ENSG00000175115 | PACS1        |
| NR4A2_Medium | chr11   | 66235140  | 66235540 | Promoter (1-2kb)  | 11      | 66233820  | 66235517 | 1320          | ENSG00000175115 | PACS1        |
| NR4A2_Medium | chr11   | 66277024  | 66277424 | Promoter (<=1kb)  | 11      | 66278175  | 66284206 | -751          | ENSG00000174871 | CNIH2        |
| NR4A2_Medium | chr11   | 66685409  | 66685809 | Promoter (<=1kb)  | 11      | 66685652  | 66686517 | 708           | ENSG00000173898 | SPTBN2       |
| NR4A2_Medium | chr11   | 66798827  | 66799227 | Promoter (2-3kb)  | 11      | 66795897  | 66804168 | 2930          | ENSG00000173715 | C11orf80     |
| NR4A2_Medium | chr11   | 66877579  | 66877979 | Promoter (5-6kb)  | 11      | 66860448  | 66872039 | -5540         | ENSG00000173599 | PC           |
| NR4A2_Medium | chr11   | 67347936  | 67348336 | Promoter (4-5kb)  | 11      | 67351548  | 67353078 | 4742          | ENSG00000175482 | POLD4        |
| NR4A2_Medium | chr11   | 67669170  | 67669570 | Promoter (1-2kb)  | 11      | 67666157  | 67667970 | -1200         | ENSG00000132746 | ALDH3B2      |
| NR4A2_Medium | chr11   | 68000175  | 68000575 | Promoter (<=1kb)  | 11      | 67991104  | 67999194 | -981          | ENSG00000110057 | UNC93B1      |
| NR4A2_Medium | chr11   | 68042297  | 68042697 | Promoter (<=1kb)  | 11      | 68042980  | 68050895 | -283          | ENSG00000110719 | TCIRG1       |
| NR4A2_Medium | chr11   | 68319491  | 68319891 | Promoter (6-7kb)  | 11      | 68312684  | 68449272 | 6807          | ENSG00000162337 | LRP5         |
| NR4A2_Medium | chr11   | 68460587  | 68460987 | Promoter (<=1kb)  | 11      | 68460731  | 68537669 | 0             | ENSG00000110075 | PPP6R3       |
| NR4A2_Medium | chr11   | 68675196  | 68675596 | Promoter (8-9kb)  | 11      | 68684544  | 68691175 | -8948         | ENSG00000069482 | GAL          |
| NR4A2_Medium | chr11   | 68769586  | 68769986 | Promoter (3-4kb)  | 11      | 68762627  | 68773887 | 3901          | ENSG00000110090 | CPT1A        |
| NR4A2_Medium | chr11   | 69009246  | 69009646 | Promoter (2-3kb)  | 11      | 69012283  | 69014066 | -2637         | ENSG00000256508 | MRGPRF-AS1   |
| NR4A2_Medium | chr11   | 69063813  | 69064213 | Promoter (8-9kb)  | 11      | 69055162  | 69090604 | 8651          | ENSG00000162341 | TPCN2        |
| NR4A2_Medium | chr11   | 69479119  | 69479519 | Promoter (2-3kb)  | 11      | 69481662  | 69493219 | -2143         | NA              | LINC01488    |
| NR4A2_Medium | chr11   | 69490026  | 69490426 | Promoter (4-5kb)  | 11      | 69485611  | 69494952 | 4415          | NA              | LINC01488    |
| NR4A2_Medium | chr11   | 69809246  | 69809646 | Promoter (7-8kb)  | 11      | 69809990  | 69817550 | 7904          | ENSG00000186895 | FGF3         |
| NR4A2_Medium | chr11   | 70092898  | 70093298 | Promoter (7-8kb)  | 11      | 70085422  | 70189252 | 7476          | ENSG00000131620 | ANO1         |
| NR4A2_Medium | chr11   | 70194941  | 70195341 | Promoter (7-8kb)  | 11      | 70203163  | 70207390 | -7822         | ENSG00000168040 | FADD         |
| NR4A2_Medium | chr11   | 70500109  | 70500509 | Promoter (2-3kb)  | 11      | 70469435  | 70502859 | 2350          | ENSG00000162105 | SHANK2       |
| NR4A2_Medium | chr11   | 71097012  | 71097412 | Promoter (2-3kb)  | 11      | 70952702  | 71094688 | -2324         | ENSG00000162105 | SHANK2       |
| NR4A2_Medium | chr11   | 71458969  | 71459369 | Promoter (3-4kb)  | 11      | 71455125  | 71501541 | 3844          | ENSG00000172890 | NADSYN1      |
| NR4A2_Medium | chr11   | 71485023  | 71485423 | Promoter (2-3kb)  | 11      | 71482723  | 71484392 | 2300          | ENSG00000172890 | NADSYN1      |
| NR4A2_Medium | chr11   | 71577496  | 71577896 | Promoter (4-5kb)  | 11      | 71581855  | 71582875 | 4979          | ENSG00000204571 | KRTAP5-11    |
| NR4A2_Medium | chr11   | 71591981  | 71592381 | Promoter (9-10kb) | 11      | 71581855  | 71582875 | -9106         | ENSG00000204571 | KRTAP5-11    |
| NR4A2_Medium | chr11   | 71925257  | 71925657 | Promoter (2-3kb)  | 11      | 71917717  | 71928403 | 2746          | ENSG00000254469 | LOC100133315 |
| NR4A2_Medium | chr11   | 71931426  | 71931826 | Promoter (2-3kb)  | 11      | 71929082  | 71997591 | 2344          | ENSG00000137522 | RNF121       |
| NR4A2_Medium | chr11   | 72045825  | 72046225 | Promoter (3-4kb)  | 11      | 72019556  | 72042142 | -3683         | ENSG00000137497 | NUMA1        |
| NR4A2_Medium | chr11   | 72348720  | 72349120 | Promoter (3-4kb)  | 11      | 72302308  | 72352566 | 3446          | ENSG00000162129 | CLPB         |
| NR4A2_Medium | chr11   | 72650718  | 72651118 | Promoter (7-8kb)  | 11      | 72642254  | 72658121 | 7003          | ENSG00000186642 | PDE2A        |
| NR4A2_Medium | chr11   | 73847597  | 73847997 | Promoter (5-6kb)  | 11      | 73842113  | 73864599 | 5484          | ENSG00000175581 | MRPL48       |
| NR4A2_Medium | chr11   | 74124657  | 74125057 | Promoter (8-9kb)  | 11      | 74129174  | 74133630 | 8573          | ENSG00000168014 | C2CD3        |
| NR4A2_Medium | chr11   | 74310258  | 74310658 | Promoter (<=1kb)  | 11      | 74311362  | 74324705 | -704          | ENSG00000246211 | P4HA3-AS1    |
| NR4A2_Medium | chr11   | 75318238  | 75318638 | Promoter (6-7kb)  | 11      | 75278677  | 75312155 | -6083         | ENSG00000137486 | ARRB1        |
| NR4A2_Medium | chr11   | 75438667  | 75439067 | Promoter (<=1kb)  | 11      | 75434939  | 75438848 | 0             | ENSG00000158555 | GDPD5        |
| NR4A2_Medium | chr11   | 75567148  | 75567548 | Promoter (<=1kb)  | 11      | 75567782  | 75572782 | -234          | ENSG00000149257 | SERPINH1     |
| NR4A2_Medium | chr11   | 75585797  | 75586197 | Promoter (2-3kb)  | 11      | 75583196  | 75594665 | 2601          | ENSG00000255326 | LOC105369391 |
| NR4A2_Medium | chr11   | 76705688  | 76706088 | Promoter (1-2kb)  | 11      | 76703274  | 76704479 | -1209         | NA              | GUCY2EP      |
| NR4A2_Medium | chr11   | 76710094  | 76710494 | Promoter (5-6kb)  | 11      | 76703274  | 76704479 | -5615         | NA              | GUCY2EP      |
| NR4A2_Medium | chr11   | 76713468  | 76713868 | Promoter (5-6kb)  | 11      | 76694041  | 76719801 | 5933          | NA              | GUCY2EP      |
| NR4A2_Medium | chr11   | 77184202  | 77184602 | Promoter (<=1kb)  | 11      | 77184686  | 77191187 | -84           | ENSG00000137474 | MYO7A        |
| NR4A2_Medium | chr11   | 77200250  | 77200650 | Promoter (2-3kb)  | 11      | 77203186  | 77215239 | -2536         | ENSG00000137474 | MYO7A        |
| NR4A2_Medium | chr11   | 77474789  | 77475189 | Promoter (<=1kb)  | 11      | 77392443  | 77474635 | -154          | ENSG00000149269 | PAK1         |
| NR4A2_Medium | chr11   | 78199444  | 78199844 | Promoter (<=1kb)  | 11      | 78198970  | 78214707 | 474           | ENSG00000118369 | USP35        |
| NR4A2_Medium | chr11   | 78906928  | 78907328 | Promoter (3-4kb)  | 11      | 78889933  | 78903886 | -3042         | ENSG00000149256 | TENM4        |
| NR4A2_Medium | chr11   | 78912805  | 78913205 | Promoter (8-9kb)  | 11      | 78889933  | 78903886 | -8919         | ENSG00000149256 | TENM4        |
| NR4A2_Medium | chr11   | 79079425  | 79079825 | Promoter (3-4kb)  | 11      | 79067903  | 79076393 | -3032         | ENSG00000149256 | TENM4        |
| NR4A2_Medium | chr11   | 82856646  | 82857046 | Promoter (1-2kb)  | 11      | 82853194  | 82858771 | 1725          | ENSG00000137509 | PRCP         |
| NR4A2_Medium | chr11   | 82922392  | 82922792 | Promoter (<=1kb)  | 11      | 82922614  | 82931956 | 0             | ENSG00000165490 | DDIAS        |
| NR4A2_Medium | chr11   | 82930654  | 82931054 | Promoter (8-9kb)  | 11      | 82922614  | 82931956 | 8040          | ENSG00000165490 | DDIAS        |
| NR4A2_Medium | chr11   | 83287229  | 83287629 | Promoter (<=1kb)  | 11      | 83259097  | 83286407 | -822          | ENSG00000137500 | CCDC90B      |
| NR4A2_Medium | chr11   | 85856296  | 85856696 | Promoter (<=1kb)  | 11      | 85855397  | 85920021 | 899           | ENSG00000150676 | CCDC83       |
| NR4A2_Medium | chr11   | 85873974  | 85874374 | Promoter (<=1kb)  | 11      | 85873231  | 85919583 | 743           | ENSG00000150676 | CCDC83       |
| NR4A2_Medium | chr11   | 86377626  | 86378026 | Promoter (2-3kb)  | 11      | 86374887  | 86423106 | 2739          | ENSG00000149201 | CCDC81       |
| NR4A2_Medium | chr11   | 86664841  | 86665241 | Promoter (6-7kb)  | 11      | 86667739  | 86671822 | 6581          | ENSG00000151376 | ME3          |
| NR4A2_Medium | chr11   | 86802937  | 86803337 | Promoter (2-3kb)  | 11      | 86800544  | 86932934 | 2393          | ENSG00000150687 | PRSS23       |
| NR4A2_Medium | chr11   | 89579     |          |                   |         |           |          |               |                 |              |

| Condition    | peakChr | peakStart | peakEnd   | annotation        | geneChr | geneStart | geneEnd   | distanceToTSS | geneID          | geneSymbol   |
|--------------|---------|-----------|-----------|-------------------|---------|-----------|-----------|---------------|-----------------|--------------|
| NR4A2_Medium | chr11   | 102454286 | 102454686 | Promoter (1-2kb)  | 11      | 102452919 | 102462008 | 1367          | ENSG00000255337 | LOC101928424 |
| NR4A2_Medium | chr11   | 102742289 | 102742689 | Promoter (4-5kb)  | 11      | 102746968 | 102831511 | -4279         | ENSG00000255282 | WTAPP1       |
| NR4A2_Medium | chr11   | 105517228 | 105517628 | Promoter (1-2kb)  | 11      | 105137721 | 105516002 | -1226         | ENSG00000255501 | CARD18       |
| NR4A2_Medium | chr11   | 107023650 | 107024050 | Promoter (5-6kb)  | 11      | 106674012 | 107018524 | -5126         | ENSG00000152402 | GUCY1A2      |
| NR4A2_Medium | chr11   | 107465722 | 107466122 | Promoter (7-8kb)  | 11      | 107326345 | 107457844 | -7878         | ENSG00000152404 | CWF19L2      |
| NR4A2_Medium | chr11   | 107571349 | 107571749 | Promoter (5-6kb)  | 11      | 107502726 | 107565746 | -5603         | ENSG00000137760 | ALKBH8       |
| NR4A2_Medium | chr11   | 108132789 | 108133189 | Promoter (<=1kb)  | 11      | 108133894 | 108139164 | -705          | ENSG00000075239 | ACAT1        |
| NR4A2_Medium | chr11   | 108143004 | 108143404 | Promoter (2-3kb)  | 11      | 108146121 | 108147588 | -2717         | ENSG00000075239 | ACAT1        |
| NR4A2_Medium | chr11   | 108229088 | 108229488 | Promoter (4-5kb)  | 11      | 108224783 | 108231594 | 4305          | ENSG00000149311 | ATM          |
| NR4A2_Medium | chr11   | 108234156 | 108234556 | Promoter (9-10kb) | 11      | 108224783 | 108231594 | 9373          | ENSG00000149311 | ATM          |
| NR4A2_Medium | chr11   | 108359671 | 108360071 | Promoter (5-6kb)  | 11      | 108353756 | 108365738 | 5915          | ENSG00000149311 | ATM          |
| NR4A2_Medium | chr11   | 110225344 | 110225744 | Promoter (7-8kb)  | 11      | 110185073 | 110233466 | 7722          | ENSG00000137710 | RDX          |
| NR4A2_Medium | chr11   | 110272225 | 110272625 | Promoter (7-8kb)  | 11      | 110258114 | 110264824 | -7401         | ENSG00000137710 | RDX          |
| NR4A2_Medium | chr11   | 110710586 | 110710986 | Promoter (1-2kb)  | 11      | 110577054 | 110712050 | 1064          | ENSG00000137727 | ARHGAP20     |
| NR4A2_Medium | chr11   | 111358278 | 111358678 | Promoter (<=1kb)  | 11      | 111354537 | 111359406 | 728           | ENSG00000110777 | POU2AF1      |
| NR4A2_Medium | chr11   | 111502350 | 111502750 | Promoter (7-8kb)  | 11      | 111510600 | 111513888 | -7850         | ENSG00000286028 | LOC728196    |
| NR4A2_Medium | chr11   | 111726621 | 111727021 | Promoter (7-8kb)  | 11      | 111718742 | 111720674 | 7879          | ENSG00000170145 | SIK2         |
| NR4A2_Medium | chr11   | 111811509 | 111811909 | Promoter (1-2kb)  | 11      | 111786284 | 111809709 | -1800         | ENSG00000086848 | ALG9         |
| NR4A2_Medium | chr11   | 113840643 | 113841043 | Promoter (7-8kb)  | 11      | 113815264 | 113833552 | -7091         | ENSG00000048028 | USP28        |
| NR4A2_Medium | chr11   | 114435979 | 114436379 | Promoter (3-4kb)  | 11      | 114439386 | 114450276 | -3007         | ENSG00000076043 | REXO2        |
| NR4A2_Medium | chr11   | 115178000 | 115178400 | Promoter (<=1kb)  | 11      | 115176327 | 115179111 | 711           | ENSG00000182985 | CADM1        |
| NR4A2_Medium | chr11   | 117139253 | 117139653 | Promoter (4-5kb)  | 11      | 117144284 | 117176874 | -4631         | ENSG00000168092 | PAFAH1B2     |
| NR4A2_Medium | chr11   | 117146479 | 117146879 | Promoter (2-3kb)  | 11      | 117144382 | 117164122 | 2097          | ENSG00000168092 | PAFAH1B2     |
| NR4A2_Medium | chr11   | 117178850 | 117179250 | Promoter (<=1kb)  | 11      | 117178932 | 117197441 | 0             | ENSG00000149577 | SIDT2        |
| NR4A2_Medium | chr11   | 118133377 | 118133777 | Promoter (8-9kb)  | 11      | 118136573 | 118141864 | 8087          | ENSG00000177098 | SCN4B        |
| NR4A2_Medium | chr11   | 118156968 | 118157368 | Promoter (4-5kb)  | 11      | 118136961 | 118152888 | -4080         | ENSG00000177098 | SCN4B        |
| NR4A2_Medium | chr11   | 118164581 | 118164981 | Promoter (6-7kb)  | 11      | 118168168 | 118171659 | 6678          | ENSG00000149575 | SCN2B        |
| NR4A2_Medium | chr11   | 118303984 | 118304384 | Promoter (<=1kb)  | 11      | 118304545 | 118316175 | -161          | ENSG00000198851 | CD3E         |
| NR4A2_Medium | chr11   | 118401728 | 118402128 | Promoter (<=1kb)  | 11      | 118401652 | 118407493 | 76            | ENSG00000167283 | ATP5MG       |
| NR4A2_Medium | chr11   | 118435237 | 118435637 | Promoter (<=1kb)  | 11      | 118436490 | 118523917 | -853          | ENSG00000118058 | KMT2A        |
| NR4A2_Medium | chr11   | 118511292 | 118511692 | Promoter (1-2kb)  | 11      | 118509548 | 118525576 | 1744          | ENSG00000118058 | KMT2A        |
| NR4A2_Medium | chr11   | 118554476 | 118554876 | Promoter (<=1kb)  | 11      | 118545825 | 118555627 | 751           | ENSG00000118096 | IFT46        |
| NR4A2_Medium | chr11   | 118602141 | 118602541 | Promoter (3-4kb)  | 11      | 118606440 | 118658031 | -3899         | ENSG00000019144 | PHLDB1       |
| NR4A2_Medium | chr11   | 118651420 | 118651820 | Promoter (<=1kb)  | 11      | 118650601 | 118657490 | 819           | ENSG00000019144 | PHLDB1       |
| NR4A2_Medium | chr11   | 118947650 | 118948050 | Promoter (8-9kb)  | 11      | 118956298 | 118958559 | -8248         | ENSG00000110375 | UPK2         |
| NR4A2_Medium | chr11   | 118950152 | 118950552 | Promoter (5-6kb)  | 11      | 118956298 | 118958559 | -5746         | ENSG00000110375 | UPK2         |
| NR4A2_Medium | chr11   | 119180078 | 119180478 | Promoter (2-3kb)  | 11      | 119177777 | 119180198 | 2301          | ENSG00000160703 | NLRX1        |
| NR4A2_Medium | chr11   | 119188523 | 119188923 | Promoter (3-4kb)  | 11      | 119185487 | 119186466 | 3036          | ENSG00000172367 | PDZD3        |
| NR4A2_Medium | chr11   | 119382407 | 119382807 | Promoter (<=1kb)  | 11      | 119381854 | 119510426 | 553           | NA              | USP2-AS1     |
| NR4A2_Medium | chr11   | 119720840 | 119721240 | Promoter (7-8kb)  | 11      | 119638098 | 119728553 | 7313          | ENSG00000110400 | NECTIN1      |
| NR4A2_Medium | chr11   | 119736294 | 119736694 | Promoter (6-7kb)  | 11      | 119729583 | 119739623 | 6711          | ENSG00000254854 | LOC102724301 |
| NR4A2_Medium | chr11   | 120384596 | 120384996 | Promoter (<=1kb)  | 11      | 120385294 | 120489034 | -298          | ENSG00000196914 | ARHGEF12     |
| NR4A2_Medium | chr11   | 121619913 | 121620313 | Promoter (5-6kb)  | 11      | 121614286 | 121622269 | 5627          | ENSG00000137642 | SORL1        |
| NR4A2_Medium | chr11   | 122883798 | 122884198 | Promoter (1-2kb)  | 11      | 122882683 | 122905892 | 1115          | ENSG00000109944 | JHY          |
| NR4A2_Medium | chr11   | 123350622 | 123351022 | Promoter (7-8kb)  | 11      | 123358428 | 123627767 | -7406         | ENSG00000023171 | GRAMD1B      |
| NR4A2_Medium | chr11   | 123464329 | 123464729 | Promoter (9-10kb) | 11      | 123454658 | 123600547 | 9671          | ENSG00000023171 | GRAMD1B      |
| NR4A2_Medium | chr11   | 123583070 | 123583562 | Promoter (7-8kb)  | 11      | 123591087 | 123627774 | -7525         | ENSG00000023171 | GRAMD1B      |
| NR4A2_Medium | chr11   | 123946981 | 123947381 | Promoter (3-4kb)  | 11      | 123942785 | 123943873 | -3108         | ENSG00000181499 | OR6T1        |
| NR4A2_Medium | chr11   | 124176051 | 124176451 | Promoter (8-9kb)  | 11      | 124185216 | 124186245 | -8765         | ENSG00000197309 | OR10D3       |
| NR4A2_Medium | chr11   | 124424738 | 124425138 | Promoter (<=1kb)  | 11      | 124423904 | 124424893 | 0             | ENSG00000280090 | OR8B4        |
| NR4A2_Medium | chr11   | 124435625 | 124436025 | Promoter (5-6kb)  | 11      | 124440126 | 124441158 | 5133          | ENSG00000197125 | OR8B8        |
| NR4A2_Medium | chr11   | 124576009 | 124576409 | Promoter (6-7kb)  | 11      | 124569997 | 124571374 | 6012          | ENSG00000196119 | OR8A1        |
| NR4A2_Medium | chr11   | 124684074 | 124684474 | Promoter (7-8kb)  | 11      | 124636847 | 124676303 | -7771         | ENSG00000110013 | SIAE         |
| NR4A2_Medium | chr11   | 125904895 | 125905295 | Promoter (<=1kb)  | 11      | 125904669 | 125910394 | 226           | ENSG00000109832 | DDX25        |
| NR4A2_Medium | chr11   | 126271942 | 126272342 | Promoter (<=1kb)  | 11      | 126273034 | 126274089 | -692          | ENSG00000110074 | FOXRED1      |
| NR4A2_Medium | chr11   | 128752096 | 128752496 | Promoter (5-6kb)  | 11      | 128758106 | 128768516 | -5610         | ENSG00000151702 | FLI1         |
| NR4A2_Medium | chr11   | 129031540 | 129031940 | Promoter (7-8kb)  | 11      | 128967947 | 129024193 | -7347         | ENSG00000134909 | ARHGAP32     |
| NR4A2_Medium | chr11   | 129810966 | 129811366 | Promoter (4-5kb)  | 11      | 129815848 | 129860003 | -4482         | ENSG00000151715 | TMEM45B      |
| NR4A2_Medium | chr11   | 129943446 | 129943846 | Promoter (<=1kb)  | 11      | 129902340 | 129942590 | -856          | ENSG00000170325 | PRDM10       |
| NR4A2_Medium | chr11   | 129954813 | 129955213 | Promoter (7-8kb)  | 11      | 129899717 | 129947622 | -7191         | ENSG00000170325 | PRDM10       |
| NR4A2_Medium | chr11   | 130102503 | 130102903 | Promoter (5-6kb)  | 11      | 130108605 | 130109602 | -5702         | ENSG00000084234 | APLP2        |
| NR4A2_Medium | chr11   | 130308813 | 130309213 | Promoter (5-6kb)  | 11      | 130226677 | 130314612 | 5399          | ENSG00000196323 | ZBTB44       |
| NR4A2_Medium | chr11   | 130451153 | 130451553 | Promoter (2-3kb)  | 11      | 130448974 | 130476641 | 2179          | ENSG00000166106 | ADAMTS15     |
| NR4A2_Medium | chr11   | 130899807 | 130900207 | Promoter (5-6kb)  | 11      | 130879713 | 130905999 | 5792          | ENSG00000120451 | SNX19        |
| NR4A2_Medium | chr11   | 133531415 | 133531815 | Promoter (<=1kb)  | 11      | 132419860 | 133532402 | 587           | ENSG00000183715 | OPCML        |
| NR4A2_Medium | chr11   | 134065382 | 134065782 | Promoter (3-4kb)  | 11      | 134069071 | 134144826 | -3289         | ENSG00000166086 | JAM3         |
| NR4A2_Medium | chr11   | 134152227 | 134152627 | Promoter (1-2kb)  | 11      | 134150119 | 134154049 | 1422          | ENSG00000151503 | NCAPD3       |
| NR4A2_Medium | chr11   | 134230894 | 134231294 | Promoter (3-4kb)  | 11      | 134234962 | 134243196 | -3668         | ENSG00000151502 | VPS26B       |
| NR4A2_Medium | chr11   | 134308003 | 134308579 | Promoter (<=1kb)  | 11      | 134307192 | 134319284 | 811           | ENSG00000166105 | GLB1L3       |
| NR4A2_Medium | chr11   | 134322906 | 134323306 | Promoter (8-9kb)  | 11      | 134331874 | 134376321 | -8568         | ENSG00000149328 | GLB1L2       |
| NR4A2_Medium | chr11   | 134406877 | 134407277 | Promoter (2-3kb)  | 11      | 134383999 | 134409881 | 2604          | ENSG00000109956 | B3GAT1       |
| NR4A2_Medium | chr11   | 134442355 | 134442755 | Promoter (5-6kb)  | 11      | 134436735 | 134505173 | 5620          | ENSG00000255545 | B3GAT1-DT    |
| NR4A2_Medium | chr11   | 134480967 | 134481367 | Promoter (1-2kb)  | 11      | 134479299 | 134505661 | 1668          | ENSG00000255545 | B3GAT1-DT    |
| NR4A2_Medium | chr11   | 134486236 | 134486636 | Promoter (6-7kb)  | 11      | 134479299 | 134505661 | 6937          | ENSG00000255545 | B3GAT1-DT    |
| NR4A2_Medium | chr11   | 134977343 | 134977743 | Promoter (7-8kb)  | 11      | 134985683 | 134986799 | -7940         | NA              | LOC100507548 |
| NR4A2_Medium | chr12   | 59087     | 59487     | Promoter (7-8kb)  | 12      | 66767     | 178455    | -7280         | ENSG00000120645 | IQSEC3       |
| NR4A2_Medium | chr12   | 609207    | 609607    | Promoter (<=1kb)  | 12      | 564376    | 610418    | 811           | ENSG00000171840 | NINJ2        |
| NR4A2_Medium | chr12   | 626077    | 626477    | Promoter (4-5kb)  | 12      | 630858    | 645380    | -4381         | ENSG00000177406 | NINJ2-AS1    |
| NR4A2_Medium | chr12   | 879010    | 879410    | Promoter (<=1kb)  | 12      | 878015    | 881971    | 995           | ENSG00000060237 | WNK1         |
| NR4A2_Medium | chr12   | 1614920   | 1615320   | Promoter (1-2kb)  | 12      | 1616660   | 1631323   | -1340         | ENSG00000111186 | WNT5B        |
| NR4A2_Medium | chr12   | 2794461   | 2794861   | Promoter (<=1kb)  | 12      | 2794970   | 2805423   | -109          | ENSG00000004478 | FKBP4        |
| NR4A2_Medium | chr12   | 2807881   | 2808281   | Promoter (4-5kb)  | 12      | 2805134   | 2812381   | 4100          | ENSG00000256150 | ITFG2-AS1    |
| NR4A2_Medium | chr12   | 3019948   | 3020348   | Promoter (8-9kb)  | 12      | 3011044   | 3021920   | 8904          | ENSG00000197905 | TEAD4        |
| NR4A2_Medium | chr12   | 3677698   | 3678098   | Promoter (4-5kb)  | 12      | 3606633   | 3673524   | -4174         | ENSG00000130038 | CRACR2A      |
| NR4A2_Medium | chr12   | 4724646   | 4725046   | Promoter (4-5kb)  | 12      | 4720400   | 4772726   | 4246          | ENSG00000130035 | GALNT8       |
| NR4A2_Medium | chr12   | 5615628   | 5616028   | Promoter (<=1kb)  | 12      | 5608729   | 5615295   | -333          | ENSG00000047617 | ANO2         |
| NR4A2_Medium | chr12   | 6230448   | 6230848   | Promoter (1-2kb)  | 12      | 6232186   | 6236262   | -1338         | ENSG00000010278 | CD9          |
| NR4A2_Medium | chr12   | 6597762   | 6598162   | Promoter (1-2kb)  | 12      | 6570319   | 6596030   | -1732         | ENSG00000111642 | CHD4         |
| NR4A2_Medium | chr12   | 6621919   | 6622319   | Promoter (9-10kb) | 12      | 6618835   | 6631649   | 9330          | ENSG00000184574 | LPAR5        |
| NR4A2_Medium | chr12   | 6741108   | 6741508   | Promoter (8-9kb)  | 12      | 6748721   | 6750318   | 8810          | ENSG00000089693 | MLF2         |
| NR4A2_Medium | chr12   | 6795028   | 6795428   | Promoter (5-6kb)  | 12      | 6789568   | 6800393   | 5460          | ENSG00000010610 | CD4          |
| NR4A2_Medium | chr12   | 7470009   | 7470409   | Promoter (1-2kb)  | 12      | 7471171   | 7471936   | 1527          | ENSG00000177575 | CD163        |
| NR4A2_Medium |         |           |           |                   |         |           |           |               |                 |              |



| Condition    | peakChr | peakStart | peakEnd  | annotation        | geneChr | geneStart | geneEnd  | distanceToTSS | geneID          | geneSymbol   |
|--------------|---------|-----------|----------|-------------------|---------|-----------|----------|---------------|-----------------|--------------|
| NR4A2_Medium | chr12   | 13052561  | 13052961 | Promoter (8-9kb)  | 12      | 13044381  | 13083449 | 8180          | ENSG00000084444 | FAM234B      |
| NR4A2_Medium | chr12   | 13387693  | 13388093 | Promoter (<=1kb)  | 12      | 13376229  | 13387167 | -526          | ENSG00000180861 | LINC01559    |
| NR4A2_Medium | chr12   | 14700020  | 14700420 | Promoter (3-4kb)  | 12      | 14612632  | 14696599 | -3421         | ENSG00000070019 | GUCY2C       |
| NR4A2_Medium | chr12   | 15156637  | 15157037 | Promoter (4-5kb)  | 12      | 15151923  | 15155283 | 4714          | ENSG00000255660 | RERG-AS1     |
| NR4A2_Medium | chr12   | 15350383  | 15350783 | Promoter (1-2kb)  | 12      | 15121065  | 15348598 | -1785         | ENSG00000134533 | RERG         |
| NR4A2_Medium | chr12   | 15735244  | 15735644 | Promoter (6-7kb)  | 12      | 15669519  | 15728265 | -6979         | ENSG00000151491 | EPS8         |
| NR4A2_Medium | chr12   | 18691744  | 18692144 | Promoter (2-3kb)  | 12      | 18683182  | 18695037 | 2893          | ENSG00000139151 | PLCZ1        |
| NR4A2_Medium | chr12   | 21128462  | 21128862 | Promoter (2-3kb)  | 12      | 21131194  | 21239796 | -2332         | ENSG00000134538 | SLCO1B1      |
| NR4A2_Medium | chr12   | 21365805  | 21366205 | Promoter (6-7kb)  | 12      | 21372902  | 21379980 | -6697         | ENSG00000121351 | IAPP         |
| NR4A2_Medium | chr12   | 21467397  | 21467797 | Promoter (<=1kb)  | 12      | 21467290  | 21468826 | 107           | ENSG00000121350 | PYROXD1      |
| NR4A2_Medium | chr12   | 21491444  | 21491844 | Promoter (9-10kb) | 12      | 21469802  | 21501551 | 9707          | ENSG00000004700 | RECQL        |
| NR4A2_Medium | chr12   | 21630384  | 21630784 | Promoter (4-5kb)  | 12      | 21556914  | 21635644 | 4860          | ENSG0000011713  | GYS2         |
| NR4A2_Medium | chr12   | 22058147  | 22058547 | Promoter (2-3kb)  | 12      | 22060642  | 22062413 | -2095         | ENSG0000011726  | CMAS         |
| NR4A2_Medium | chr12   | 25162309  | 25162709 | Promoter (3-4kb)  | 12      | 25108420  | 25158563 | -3746         | ENSG00000118307 | CFAP94       |
| NR4A2_Medium | chr12   | 25163343  | 25163743 | Promoter (4-5kb)  | 12      | 25108420  | 25158563 | -4780         | ENSG00000118307 | CFAP94       |
| NR4A2_Medium | chr12   | 25205550  | 25205950 | Promoter (9-10kb) | 12      | 25195553  | 25204147 | 9997          | ENSG00000205707 | ETFRF1       |
| NR4A2_Medium | chr12   | 25543345  | 25543745 | Promoter (9-10kb) | 12      | 25476082  | 25553244 | 9499          | ENSG00000152936 | LMNTD1       |
| NR4A2_Medium | chr12   | 26896807  | 26897207 | Promoter (9-10kb) | 12      | 26905185  | 26906484 | 9277          | ENSG00000064102 | INTS13       |
| NR4A2_Medium | chr12   | 27025020  | 27025420 | Promoter (2-3kb)  | 12      | 27022577  | 27066240 | 2443          | ENSG00000152944 | MED21        |
| NR4A2_Medium | chr12   | 29371799  | 29372199 | Promoter (<=1kb)  | 12      | 29337356  | 29371661 | -138          | ENSG00000087502 | ERGIC2       |
| NR4A2_Medium | chr12   | 29634745  | 29635145 | Promoter (6-7kb)  | 12      | 29505982  | 29641238 | 6093          | ENSG00000133687 | TMTC1        |
| NR4A2_Medium | chr12   | 31420733  | 31421133 | Promoter (5-6kb)  | 12      | 31424569  | 31426751 | 5618          | ENSG00000170456 | DENND5B      |
| NR4A2_Medium | chr12   | 31580674  | 31581074 | Promoter (8-9kb)  | 12      | 31589923  | 31615351 | -8849         | ENSG00000255867 | DENND5B-AS1  |
| NR4A2_Medium | chr12   | 31650370  | 31650770 | Promoter (3-4kb)  | 12      | 31647160  | 31668075 | 3210          | ENSG00000139160 | ETFBKMT      |
| NR4A2_Medium | chr12   | 32730892  | 32731292 | Promoter (<=1kb)  | 12      | 32731469  | 32738151 | -177          | ENSG00000087470 | DNM1L        |
| NR4A2_Medium | chr12   | 34027646  | 34028046 | Promoter (5-6kb)  | 12      | 34022496  | 34028302 | 5150          | ENSG00000139133 | ALG10        |
| NR4A2_Medium | chr12   | 39434825  | 39435225 | Promoter (7-8kb)  | 12      | 39293229  | 39442943 | 7718          | ENSG00000139116 | KIF21A       |
| NR4A2_Medium | chr12   | 42486262  | 42486662 | Promoter (1-2kb)  | 12      | 42456763  | 42484444 | -1818         | ENSG00000139174 | PRICKLE1     |
| NR4A2_Medium | chr12   | 43748914  | 43749314 | Promoter (9-10kb) | 12      | 43728607  | 43758758 | 9444          | ENSG00000129317 | PUS7L        |
| NR4A2_Medium | chr12   | 44067909  | 44068309 | Promoter (5-6kb)  | 12      | 44073512  | 44376724 | -5203         | ENSG00000139173 | TMEM117      |
| NR4A2_Medium | chr12   | 47078338  | 47078738 | Promoter (<=1kb)  | 12      | 47079603  | 47236662 | -865          | ENSG00000179715 | PCED1B       |
| NR4A2_Medium | chr12   | 47374097  | 47374497 | Promoter (3-4kb)  | 12      | 47377638  | 47420179 | -3141         | NA              | LINC02156    |
| NR4A2_Medium | chr12   | 47701543  | 47701943 | Promoter (<=1kb)  | 12      | 47700015  | 47702816 | 873           | ENSG00000005175 | RPAP3        |
| NR4A2_Medium | chr12   | 48010688  | 48011088 | Promoter (6-7kb)  | 12      | 47999697  | 48004554 | -6134         | ENSG00000139219 | COL2A1       |
| NR4A2_Medium | chr12   | 48184968  | 48185368 | Promoter (1-2kb)  | 12      | 48183644  | 48185926 | 1324          | ENSG00000177875 | CCDC184      |
| NR4A2_Medium | chr12   | 48502765  | 48503165 | Promoter (9-10kb) | 12      | 48492894  | 48496386 | 9871          | ENSG00000177627 | C12orf54     |
| NR4A2_Medium | chr12   | 48995215  | 48995615 | Promoter (2-3kb)  | 12      | 48998367  | 49019235 | -2752         | ENSG00000257913 | DDN-AS1      |
| NR4A2_Medium | chr12   | 49316900  | 49317300 | Promoter (5-6kb)  | 12      | 49323236  | 49324296 | -5936         | ENSG00000135451 | TROAP        |
| NR4A2_Medium | chr12   | 49383389  | 49383789 | Promoter (5-6kb)  | 12      | 49389516  | 49390162 | -5727         | NA              | LOC100335030 |
| NR4A2_Medium | chr12   | 49528935  | 49529335 | Promoter (6-7kb)  | 12      | 49522749  | 49526198 | 6186          | ENSG00000123352 | SPATS2       |
| NR4A2_Medium | chr12   | 49598954  | 49599354 | Promoter (<=1kb)  | 12      | 49582885  | 49598789 | -165          | ENSG00000135436 | FAM186B      |
| NR4A2_Medium | chr12   | 49798987  | 49799387 | Promoter (1-2kb)  | 12      | 49791146  | 49797002 | -1985         | ENSG00000167566 | NCKAP5L      |
| NR4A2_Medium | chr12   | 49921303  | 49921703 | Promoter (2-3kb)  | 12      | 49923936  | 49930325 | -2233         | ENSG00000257771 | LINC02395    |
| NR4A2_Medium | chr12   | 50141724  | 50142124 | Promoter (<=1kb)  | 12      | 50134573  | 50142093 | 0             | ENSG00000139624 | CERS5        |
| NR4A2_Medium | chr12   | 50161822  | 50162222 | Promoter (5-6kb)  | 12      | 50135519  | 50167300 | 5078          | ENSG00000139624 | CERS5        |
| NR4A2_Medium | chr12   | 50343532  | 50343932 | Promoter (6-7kb)  | 12      | 50326230  | 50350885 | 6953          | ENSG00000185958 | FAM186A      |
| NR4A2_Medium | chr12   | 50347696  | 50348096 | Promoter (2-3kb)  | 12      | 50326230  | 50350885 | 2789          | ENSG00000185958 | FAM186A      |
| NR4A2_Medium | chr12   | 50431707  | 50432107 | Promoter (8-9kb)  | 12      | 50440439  | 50476456 | -8332         | ENSG00000161813 | LARP4        |
| NR4A2_Medium | chr12   | 50680168  | 50680568 | Promoter (5-6kb)  | 12      | 50685848  | 50686892 | -5280         | ENSG00000066084 | DIP2B        |
| NR4A2_Medium | chr12   | 50914894  | 50915294 | Promoter (8-9kb)  | 12      | 50923472  | 50932510 | -8178         | ENSG00000185432 | METTL7A      |
| NR4A2_Medium | chr12   | 51058525  | 51058925 | Promoter (2-3kb)  | 12      | 51056371  | 51059649 | 2154          | ENSG00000050426 | LETMD1       |
| NR4A2_Medium | chr12   | 51328870  | 51329270 | Promoter (4-5kb)  | 12      | 51281282  | 51324668 | -4202         | ENSG00000110934 | BIN2         |
| NR4A2_Medium | chr12   | 51362316  | 51362716 | Promoter (2-3kb)  | 12      | 51353769  | 51360226 | -2090         | ENSG00000139629 | GALNT6       |
| NR4A2_Medium | chr12   | 52223240  | 52223640 | Promoter (1-2kb)  | 12      | 52221339  | 52223749 | 1901          | ENSG00000258279 | LINC00592    |
| NR4A2_Medium | chr12   | 52233869  | 52234269 | Promoter (<=1kb)  | 12      | 52233592  | 52241508 | 277           | ENSG00000135480 | KRT7         |
| NR4A2_Medium | chr12   | 52313204  | 52313604 | Promoter (7-8kb)  | 12      | 52314301  | 52321398 | 7794          | ENSG00000170523 | KRT83        |
| NR4A2_Medium | chr12   | 52408786  | 52409186 | Promoter (2-3kb)  | 12      | 52393931  | 52406355 | -2431         | ENSG00000161850 | KRT82        |
| NR4A2_Medium | chr12   | 53174016  | 53174416 | Promoter (<=1kb)  | 12      | 53173269  | 53173944 | -72           | ENSG00000139631 | CSAD         |
| NR4A2_Medium | chr12   | 53210371  | 53210771 | Promoter (3-4kb)  | 12      | 53191323  | 53207282 | -3089         | ENSG00000139626 | ITGB7        |
| NR4A2_Medium | chr12   | 53223182  | 53223582 | Promoter (2-3kb)  | 12      | 53211393  | 53220413 | -2769         | ENSG00000172819 | RARG         |
| NR4A2_Medium | chr12   | 53272725  | 53273125 | Promoter (<=1kb)  | 12      | 53274081  | 53274952 | -956          | ENSG00000135476 | ESPL1        |
| NR4A2_Medium | chr12   | 53476820  | 53477220 | Promoter (5-6kb)  | 12      | 53481122  | 53482587 | 5367          | ENSG00000139625 | MAP3K12      |
| NR4A2_Medium | chr12   | 54297390  | 54297790 | Promoter (<=1kb)  | 12      | 54292465  | 54297884 | 94            | ENSG00000123405 | NFE2         |
| NR4A2_Medium | chr12   | 54422768  | 54423168 | Promoter (2-3kb)  | 12      | 54419785  | 54437104 | 2983          | ENSG00000258137 | LOC102724050 |
| NR4A2_Medium | chr12   | 54585053  | 54585453 | Promoter (<=1kb)  | 12      | 54580112  | 54584316 | -737          | ENSG00000135447 | PPP1R1A      |
| NR4A2_Medium | chr12   | 55370183  | 55370583 | Promoter (5-6kb)  | 12      | 55365111  | 55366049 | 5072          | ENSG00000187857 | OR6C75       |
| NR4A2_Medium | chr12   | 55697349  | 55697749 | Promoter (<=1kb)  | 12      | 55697752  | 55698162 | 413           | ENSG00000135424 | ITGA7        |
| NR4A2_Medium | chr12   | 55765162  | 55765562 | Promoter (4-5kb)  | 12      | 55757271  | 55760785 | -4377         | ENSG00000205323 | SARNP        |
| NR4A2_Medium | chr12   | 56034625  | 56035025 | Promoter (2-3kb)  | 12      | 56032280  | 56034600 | 2345          | ENSG00000123411 | IKZF4        |
| NR4A2_Medium | chr12   | 56259342  | 56259742 | Promoter (<=1kb)  | 12      | 56237807  | 56258384 | -958          | ENSG00000139645 | ANKRD52      |
| NR4A2_Medium | chr12   | 56725973  | 56726373 | Promoter (<=1kb)  | 12      | 56712428  | 56725542 | -431          | ENSG00000196531 | NACA         |
| NR4A2_Medium | chr12   | 56794877  | 56795277 | Promoter (8-9kb)  | 12      | 56785929  | 56787345 | 8948          | ENSG00000025423 | HSD17B6      |
| NR4A2_Medium | chr12   | 57191722  | 57192122 | Promoter (2-3kb)  | 12      | 57194504  | 57194576 | -2382         | ENSG00000221365 | MIR1228      |
| NR4A2_Medium | chr12   | 57286552  | 57286952 | Promoter (8-9kb)  | 12      | 57254733  | 57295479 | 8527          | ENSG00000179912 | R3HDM2       |
| NR4A2_Medium | chr12   | 57344298  | 57344698 | Promoter (2-3kb)  | 12      | 57254756  | 57341482 | -2816         | ENSG00000179912 | R3HDM2       |
| NR4A2_Medium | chr12   | 57814954  | 57815354 | Promoter (<=1kb)  | 12      | 57797740  | 57816058 | 704           | ENSG00000135407 | AVIL         |
| NR4A2_Medium | chr12   | 57927911  | 57928311 | Promoter (7-8kb)  | 12      | 57931569  | 57936059 | 7748          | ENSG00000257698 | GIHCG        |
| NR4A2_Medium | chr12   | 58922633  | 58923033 | Promoter (2-3kb)  | 12      | 58872149  | 58920522 | -2111         | ENSG00000139263 | LRIG3        |
| NR4A2_Medium | chr12   | 62579045  | 62579445 | Promoter (<=1kb)  | 12      | 62578454  | 62585745 | 591           | ENSG00000061987 | MON2         |
| NR4A2_Medium | chr12   | 64407196  | 64407596 | Promoter (2-3kb)  | 12      | 64409657  | 64420185 | -2061         | ENSG00000184575 | XPOT         |
| NR4A2_Medium | chr12   | 64489140  | 64489540 | Promoter (4-5kb)  | 12      | 64484407  | 64488586 | 4733          | ENSG00000183735 | TBK1         |
| NR4A2_Medium | chr12   | 64509402  | 64509802 | Promoter (2-3kb)  | 12      | 64507001  | 64694912 | 2401          | ENSG00000153179 | RASSF3       |
| NR4A2_Medium | chr12   | 64817732  | 64818132 | Promoter (6-7kb)  | 12      | 64824647  | 64881033 | -6515         | ENSG00000111490 | TBC1D30      |
| NR4A2_Medium | chr12   | 65120983  | 65121383 | Promoter (<=1kb)  | 12      | 65050626  | 65121305 | 0             | ENSG00000156076 | WIF1         |
| NR4A2_Medium | chr12   | 65554948  | 65555348 | Promoter (1-2kb)  | 12      | 65544238  | 65557311 | 1963          | ENSG00000250748 | LOC105369187 |
| NR4A2_Medium | chr12   | 65611430  | 65611830 | Promoter (1-2kb)  | 12      | 65608471  | 65613229 | 1399          | NA              | LOC100507065 |
| NR4A2_Medium | chr12   | 65882897  | 65883297 | Promoter (<=1kb)  | 12      | 65851340  | 65882167 | -730          | ENSG00000197301 | HMG2-AS1     |
| NR4A2_Medium | chr12   | 66396801  | 66397201 | Promoter (4-5kb)  | 12      | 66371864  | 66392532 | -4269         | ENSG00000155974 | GRIP1        |
| NR4A2_Medium | chr12   | 66565057  | 66565457 | Promoter (5-6kb)  | 12      | 66371819  | 66571058 | 5601          | ENSG00000155974 | GRIP1        |
| NR4A2_Medium | chr12   | 68252194  | 68252594 | Promoter (<=1kb)  | 12      | 68248789  | 68253502 | 908           | ENSG00000127318 | IL22         |
| NR4A2_Medium | chr12   | 68296289  | 68296689 | Promoter (6-7kb)  | 12      | 68294815  | 68302872 | 6183          | ENSG00000111554 | MDM1         |
| NR4A2_Medium | chr12   | 69367074  | 69367474 | Promoter (7-8kb)  | 12      | 69359779  | 69370971 | 7295          | ENSG00000127337 | YEATS4       |
| NR4A2_Medium | chr12   | 69617475  | 69617875 | Promoter (6-7kb)  | 12      | 69608564  | 69610907 | -6568         | ENSG00000198812 | LRRIC10      |
| NR4A2_Medium | chr12   | 69692924  | 69693324 | Promoter (<=1kb)  | 12      | 69671573  | 69694072 | 748           | ENSG00000127325 |              |

| Condition    | peakChr | peakStart | peakEnd   | annotation        | geneChr | geneStart | geneEnd   | distanceToTSS | geneID          | geneSymbol   |
|--------------|---------|-----------|-----------|-------------------|---------|-----------|-----------|---------------|-----------------|--------------|
| NR4A2_Medium | chr12   | 78359860  | 78360260  | Promoter (<=1kb)  | 12      | 78326680  | 78359746  | -114          | ENSG00000258220 | LINC02424    |
| NR4A2_Medium | chr12   | 79785129  | 79785529  | Promoter (1-2kb)  | 12      | 79775918  | 79786914  | 1385          | ENSG00000058272 | PPP1R12A     |
| NR4A2_Medium | chr12   | 79873096  | 79873496  | Promoter (<=1kb)  | 12      | 79828371  | 79872872  | -224          | ENSG00000058272 | PPP1R12A     |
| NR4A2_Medium | chr12   | 79930317  | 79930717  | Promoter (3-4kb)  | 12      | 79821112  | 79934715  | 3998          | ENSG00000058272 | PPP1R12A     |
| NR4A2_Medium | chr12   | 80824007  | 80824407  | Promoter (8-9kb)  | 12      | 80832533  | 80832629  | 8222          | ENSG00000207763 | MIR617       |
| NR4A2_Medium | chr12   | 89356454  | 89356854  | Promoter (3-4kb)  | 12      | 89347235  | 89352501  | -3953         | ENSG00000139318 | DUSP6        |
| NR4A2_Medium | chr12   | 90998777  | 90999177  | Promoter (3-4kb)  | 12      | 90972556  | 91002469  | 3292          | ENSG00000083782 | EPYC         |
| NR4A2_Medium | chr12   | 91058998  | 91059398  | Promoter (1-2kb)  | 12      | 91050491  | 91057983  | -1015         | ENSG00000139330 | KERA         |
| NR4A2_Medium | chr12   | 93169399  | 93169799  | Promoter (3-4kb)  | 12      | 93173470  | 93180254  | -3671         | NA              | LINC02412    |
| NR4A2_Medium | chr12   | 93447568  | 93447968  | Promoter (5-6kb)  | 12      | 93405684  | 93441947  | -5621         | ENSG00000177889 | UBE2N        |
| NR4A2_Medium | chr12   | 93935984  | 93936384  | Promoter (7-8kb)  | 12      | 93894965  | 93943603  | 7219          | ENSG00000257283 | LOC105369911 |
| NR4A2_Medium | chr12   | 94264178  | 94264578  | Promoter (<=1kb)  | 12      | 94265131  | 94279986  | -553          | ENSG00000136040 | PLXNC1       |
| NR4A2_Medium | chr12   | 95288857  | 95289257  | Promoter (5-6kb)  | 12      | 95294272  | 95300562  | -5015         | ENSG00000028203 | VEZT         |
| NR4A2_Medium | chr12   | 95668804  | 95669204  | Promoter (2-3kb)  | 12      | 95663397  | 95665859  | -2945         | ENSG00000074527 | NTN4         |
| NR4A2_Medium | chr12   | 95976900  | 95977300  | Promoter (3-4kb)  | 12      | 95976103  | 95980668  | 3368          | ENSG00000084110 | HAL          |
| NR4A2_Medium | chr12   | 98520036  | 98520436  | Promoter (3-4kb)  | 12      | 98512973  | 98516422  | -3614         | ENSG00000257167 | TMPO-AS1     |
| NR4A2_Medium | chr12   | 98600123  | 98600523  | Promoter (<=1kb)  | 12      | 98599858  | 98601708  | 265           | ENSG00000075415 | SLC25A3      |
| NR4A2_Medium | chr12   | 98650355  | 98650755  | Promoter (1-2kb)  | 12      | 98648360  | 98732566  | 1995          | ENSG00000120868 | APAF1        |
| NR4A2_Medium | chr12   | 100415953 | 100416353 | Promoter (5-6kb)  | 12      | 100410621 | 100420089 | 5332          | ENSG00000179520 | SLC17A8      |
| NR4A2_Medium | chr12   | 100613207 | 100613607 | Promoter (1-2kb)  | 12      | 100612101 | 100618687 | 1106          | ENSG00000139354 | GAS2L3       |
| NR4A2_Medium | chr12   | 101040433 | 101040833 | Promoter (1-2kb)  | 12      | 101042380 | 101086813 | -1547         | ENSG00000151572 | AN04         |
| NR4A2_Medium | chr12   | 101870940 | 101871340 | Promoter (6-7kb)  | 12      | 101877580 | 101923612 | -6240         | ENSG00000136048 | DRAM1        |
| NR4A2_Medium | chr12   | 102042807 | 102043207 | Promoter (2-3kb)  | 12      | 102012946 | 102040434 | -2373         | ENSG00000120860 | WASHC3       |
| NR4A2_Medium | chr12   | 103943752 | 103944152 | Promoter (<=1kb)  | 12      | 103943796 | 103953645 | 0             | ENSG00000166598 | HSP90B1      |
| NR4A2_Medium | chr12   | 104252385 | 104252785 | Promoter (<=1kb)  | 12      | 104251546 | 104284406 | 839           | ENSG00000198431 | TXNRD1       |
| NR4A2_Medium | chr12   | 105735563 | 105735963 | Promoter (<=1kb)  | 12      | 105736742 | 105743998 | -779          | ENSG00000257859 | CASC18       |
| NR4A2_Medium | chr12   | 107578112 | 107578512 | Promoter (2-3kb)  | 12      | 107580650 | 107659642 | -2138         | ENSG00000151136 | BTBD11       |
| NR4A2_Medium | chr12   | 108472220 | 108472620 | Promoter (1-2kb)  | 12      | 108459425 | 108473689 | 1069          | ENSG00000247213 | LINC01498    |
| NR4A2_Medium | chr12   | 108690537 | 108690937 | Promoter (5-6kb)  | 12      | 108647380 | 108696402 | 5465          | ENSG00000110880 | CORO1C       |
| NR4A2_Medium | chr12   | 109065576 | 109065976 | Promoter (1-2kb)  | 12      | 109067594 | 109081628 | -1618         | ENSG00000135093 | USP30        |
| NR4A2_Medium | chr12   | 109119229 | 109119629 | Promoter (2-3kb)  | 12      | 109116595 | 109268226 | 2634          | ENSG00000076555 | ACACB        |
| NR4A2_Medium | chr12   | 109132027 | 109132427 | Promoter (<=1kb)  | 12      | 109131358 | 109139910 | 669           | ENSG00000076555 | ACACB        |
| NR4A2_Medium | chr12   | 109161676 | 109162076 | Promoter (6-7kb)  | 12      | 109154682 | 109172311 | 6994          | ENSG00000076555 | ACACB        |
| NR4A2_Medium | chr12   | 109279446 | 109279846 | Promoter (6-7kb)  | 12      | 109277979 | 109286723 | 6877          | ENSG00000139445 | FOXN4        |
| NR4A2_Medium | chr12   | 109309220 | 109309620 | Promoter (<=1kb)  | 12      | 109277978 | 109309284 | 0             | ENSG00000139445 | FOXN4        |
| NR4A2_Medium | chr12   | 109712059 | 109712459 | Promoter (1-2kb)  | 12      | 109714228 | 109770507 | -1769         | ENSG00000139438 | FAM222A      |
| NR4A2_Medium | chr12   | 109934498 | 109934898 | Promoter (4-5kb)  | 12      | 109933038 | 109938977 | 4079          | ENSG00000139436 | GIT2         |
| NR4A2_Medium | chr12   | 110475668 | 110476068 | Promoter (6-7kb)  | 12      | 110468280 | 110469268 | -6400         | ENSG00000111231 | GPN3         |
| NR4A2_Medium | chr12   | 110678148 | 110678548 | Promoter (4-5kb)  | 12      | 110648686 | 110683267 | 4719          | ENSG00000122986 | HVCN1        |
| NR4A2_Medium | chr12   | 111680992 | 111681392 | Promoter (4-5kb)  | 12      | 111644082 | 111685720 | 4328          | ENSG00000089234 | BRAP         |
| NR4A2_Medium | chr12   | 111903191 | 111903591 | Promoter (3-4kb)  | 12      | 111899263 | 111901391 | 3928          | NA              | ADAM1A       |
| NR4A2_Medium | chr12   | 112386968 | 112387368 | Promoter (4-5kb)  | 12      | 112160190 | 112382439 | -4529         | ENSG00000173064 | HECTD4       |
| NR4A2_Medium | chr12   | 112574570 | 112574970 | Promoter (<=1kb)  | 12      | 112575027 | 112865465 | -57           | ENSG00000089169 | RPH3A        |
| NR4A2_Medium | chr12   | 112793808 | 112794208 | Promoter (1-2kb)  | 12      | 112792247 | 112866799 | 1561          | ENSG00000089169 | RPH3A        |
| NR4A2_Medium | chr12   | 112798679 | 112799079 | Promoter (6-7kb)  | 12      | 112792247 | 112866799 | 6432          | ENSG00000089169 | RPH3A        |
| NR4A2_Medium | chr12   | 113291748 | 113292148 | Promoter (<=1kb)  | 12      | 113291523 | 113291608 | 225           | ENSG00000274822 | MIR6762      |
| NR4A2_Medium | chr12   | 113314979 | 113315379 | Promoter (3-4kb)  | 12      | 113298773 | 113319325 | 3946          | ENSG00000089060 | SLC8B1       |
| NR4A2_Medium | chr12   | 113476715 | 113477115 | Promoter (4-5kb)  | 12      | 113472003 | 113480624 | 4712          | NA              | LHX5-AS1     |
| NR4A2_Medium | chr12   | 113923788 | 113924188 | Promoter (3-4kb)  | 12      | 113914969 | 113927431 | 3243          | ENSG00000122965 | RBM19        |
| NR4A2_Medium | chr12   | 117558907 | 117559307 | Promoter (3-4kb)  | 12      | 117539472 | 117555229 | -3678         | ENSG00000171435 | KSR2         |
| NR4A2_Medium | chr12   | 117677744 | 117678144 | Promoter (<=1kb)  | 12      | 117517706 | 117677251 | -493          | ENSG00000171435 | KSR2         |
| NR4A2_Medium | chr12   | 117969466 | 117969866 | Promoter (<=1kb)  | 12      | 117453012 | 117968990 | -476          | ENSG00000171435 | KSR2         |
| NR4A2_Medium | chr12   | 118082921 | 118083321 | Promoter (<=1kb)  | 12      | 118079454 | 118082278 | -643          | ENSG00000176834 | VSIG10       |
| NR4A2_Medium | chr12   | 118841017 | 118841417 | Promoter (7-8kb)  | 12      | 118818804 | 118833536 | -7481         | ENSG00000255814 | LINC02439    |
| NR4A2_Medium | chr12   | 119127474 | 119127874 | Promoter (2-3kb)  | 12      | 119130678 | 119151220 | -2804         | ENSG00000139767 | SRRM4        |
| NR4A2_Medium | chr12   | 120378343 | 120378743 | Promoter (9-10kb) | 12      | 120341330 | 120369164 | -9179         | ENSG00000135097 | MS1          |
| NR4A2_Medium | chr12   | 120550459 | 120550859 | Promoter (3-4kb)  | 12      | 120554350 | 120557368 | -3491         | ENSG00000022840 | RNF10        |
| NR4A2_Medium | chr12   | 121308521 | 121308921 | Promoter (1-2kb)  | 12      | 121308245 | 121310394 | 1473          | ENSG00000089053 | ANAPC5       |
| NR4A2_Medium | chr12   | 121502656 | 121503056 | Promoter (6-7kb)  | 12      | 121429509 | 121509706 | 6650          | ENSG00000089094 | KDM2B        |
| NR4A2_Medium | chr12   | 121553714 | 121554114 | Promoter (4-5kb)  | 12      | 121429509 | 121549639 | -4075         | ENSG00000089094 | KDM2B        |
| NR4A2_Medium | chr12   | 121667521 | 121667921 | Promoter (1-2kb)  | 12      | 121651392 | 121669650 | 1729          | ENSG00000139714 | MORN3        |
| NR4A2_Medium | chr12   | 121868327 | 121868727 | Promoter (4-5kb)  | 12      | 121839530 | 121863596 | -4731         | ENSG00000158104 | HPD          |
| NR4A2_Medium | chr12   | 121965107 | 121965507 | Promoter (3-4kb)  | 12      | 121961994 | 121969966 | 3113          | ENSG00000158023 | CFAP251      |
| NR4A2_Medium | chr12   | 122159102 | 122159502 | Promoter (8-9kb)  | 12      | 122167738 | 122191474 | -8236         | ENSG00000158113 | LRRC43       |
| NR4A2_Medium | chr12   | 122221645 | 122222045 | Promoter (<=1kb)  | 12      | 122207842 | 122222556 | 511           | ENSG00000184047 | DIABLO       |
| NR4A2_Medium | chr12   | 122352548 | 122352948 | Promoter (3-4kb)  | 12      | 122341088 | 122356160 | 3212          | ENSG00000130779 | CLIP1        |
| NR4A2_Medium | chr12   | 122610744 | 122611144 | Promoter (<=1kb)  | 12      | 122610861 | 122613669 | 0             | ENSG00000184445 | KNTC1        |
| NR4A2_Medium | chr12   | 122977757 | 122978157 | Promoter (<=1kb)  | 12      | 122977425 | 122979265 | 332           | ENSG00000111325 | OGFOD2       |
| NR4A2_Medium | chr12   | 123088878 | 123089278 | Promoter (6-7kb)  | 12      | 123082790 | 123084129 | 6088          | ENSG00000251497 | PITPNM2-AS1  |
| NR4A2_Medium | chr12   | 123115960 | 123116360 | Promoter (5-6kb)  | 12      | 122983480 | 123110495 | -5465         | ENSG00000090975 | PITPNM2      |
| NR4A2_Medium | chr12   | 123368630 | 123369030 | Promoter (3-4kb)  | 12      | 123364953 | 123366113 | 3677          | NA              | SBNO1-AS1    |
| NR4A2_Medium | chr12   | 123511752 | 123512152 | Promoter (2-3kb)  | 12      | 123472068 | 123514428 | 2276          | ENSG00000188026 | RILPL1       |
| NR4A2_Medium | chr12   | 123581226 | 123581626 | Promoter (2-3kb)  | 12      | 123584533 | 123590446 | -2907         | ENSG00000086598 | TMED2        |
| NR4A2_Medium | chr12   | 123596049 | 123596449 | Promoter (5-6kb)  | 12      | 123602077 | 123619716 | -5628         | ENSG00000111364 | DDX55        |
| NR4A2_Medium | chr12   | 123654247 | 123654647 | Promoter (4-5kb)  | 12      | 123659363 | 123660628 | -4716         | ENSG00000111358 | GTF2H3       |
| NR4A2_Medium | chr12   | 123675874 | 123676274 | Promoter (4-5kb)  | 12      | 123671113 | 123708399 | 4761          | ENSG00000168778 | TCTN2        |
| NR4A2_Medium | chr12   | 124943569 | 124943969 | Promoter (4-5kb)  | 12      | 124947601 | 124948615 | 4646          | ENSG00000150990 | DHX37        |
| NR4A2_Medium | chr12   | 124971643 | 124972043 | Promoter (4-5kb)  | 12      | 124964393 | 124967005 | -4638         | ENSG00000150990 | DHX37        |
| NR4A2_Medium | chr12   | 125119638 | 125120038 | Promoter (<=1kb)  | 12      | 125119858 | 125143333 | 0             | ENSG00000081760 | AACS         |
| NR4A2_Medium | chr12   | 125329254 | 125329654 | Promoter (2-3kb)  | 12      | 125326616 | 125662371 | 2638          | ENSG00000139364 | TMEM132B     |
| NR4A2_Medium | chr12   | 126971530 | 126971930 | Promoter (1-2kb)  | 12      | 126915293 | 126973789 | 1859          | ENSG00000249345 | LINC02405    |
| NR4A2_Medium | chr12   | 128864602 | 128865002 | Promoter (<=1kb)  | 12      | 128864136 | 128983739 | 466           | ENSG00000151948 | GLT1D1       |
| NR4A2_Medium | chr12   | 129910070 | 129910470 | Promoter (6-7kb)  | 12      | 129071726 | 129904025 | -6045         | ENSG00000151952 | TMEM132D     |
| NR4A2_Medium | chr12   | 130051834 | 130052234 | Promoter (6-7kb)  | 12      | 130033454 | 130045057 | -6777         | ENSG00000214039 | LINC02418    |
| NR4A2_Medium | chr12   | 130055017 | 130055417 | Promoter (9-10kb) | 12      | 130033454 | 130045057 | -9960         | ENSG00000214039 | LINC02418    |
| NR4A2_Medium | chr12   | 130641149 | 130641549 | Promoter (7-8kb)  | 12      | 130456496 | 130633861 | -7288         | ENSG00000060709 | RIMBP2       |
| NR4A2_Medium | chr12   | 130848863 | 130849263 | Promoter (9-10kb) | 12      | 130789600 | 130839266 | -9597         | ENSG00000111450 | STX2         |
| NR4A2_Medium | chr12   | 130993576 | 130993976 | Promoter (<=1kb)  | 12      | 130990138 | 130993976 | 0             | NA              | ADGRD1-AS1   |
| NR4A2_Medium | chr12   | 131204005 | 131204405 | Promoter (2-3kb)  | 12      | 131207154 | 131217648 | -2749         | ENSG00000204603 | LINC01257    |
| NR4A2_Medium | chr12   | 132496491 | 132496891 | Promoter (6-7kb)  | 12      | 132489551 | 132585188 | 6940          | ENSG00000112787 | FBRS1        |
| NR4A2_Medium | chr12   | 132552624 | 132553024 | Promoter (7-8kb)  | 12      | 132560047 | 132570104 | -7023         | ENSG00000112787 | FBRS1        |
| NR4A2_Medium | chr12   | 132626378 | 132626778 | Promoter (<=1kb)  | 12      | 132623753 | 132625951 | -427          | ENSG0000        |              |



| Condition    | peakChr | peakStart | peakEnd   | annotation        | geneChr | geneStart | geneEnd   | distanceToTSS | geneID          | geneSymbol   |
|--------------|---------|-----------|-----------|-------------------|---------|-----------|-----------|---------------|-----------------|--------------|
| NR4A2_Medium | chr13   | 24336181  | 24336581  | Promoter (4-5kb)  | 13      | 24331450  | 24337121  | 4731          | ENSG00000261498 | LINC00566    |
| NR4A2_Medium | chr13   | 24674373  | 24674773  | Promoter (5-6kb)  | 13      | 24680411  | 24711783  | -5638         | ENSG00000075673 | ATP12A       |
| NR4A2_Medium | chr13   | 25466558  | 25466958  | Promoter (2-3kb)  | 13      | 25468977  | 25534225  | -2019         | ENSG00000132932 | ATP8A2       |
| NR4A2_Medium | chr13   | 26762729  | 26763129  | Promoter (1-2kb)  | 13      | 26755200  | 26760786  | -1943         | ENSG00000132975 | GFR12        |
| NR4A2_Medium | chr13   | 29512948  | 29513348  | Promoter (6-7kb)  | 13      | 29516867  | 29519510  | 6162          | ENSG00000139514 | SLC7A1       |
| NR4A2_Medium | chr13   | 30386752  | 30387152  | Promoter (9-10kb) | 13      | 30357742  | 30377145  | -9607         | ENSG00000238121 | LINC00426    |
| NR4A2_Medium | chr13   | 30427480  | 30427880  | Promoter (4-5kb)  | 13      | 30422493  | 30429758  | 4987          | ENSG00000236444 | UBE2L5       |
| NR4A2_Medium | chr13   | 34351148  | 34351548  | Promoter (3-4kb)  | 13      | 34348043  | 34614170  | 3105          | ENSG00000271850 | LINC02343    |
| NR4A2_Medium | chr13   | 35706722  | 35707122  | Promoter (9-10kb) | 13      | 35697525  | 35699256  | 9197          | ENSG00000236036 | LINC00445    |
| NR4A2_Medium | chr13   | 35851857  | 35852257  | Promoter (3-4kb)  | 13      | 35771339  | 35855642  | 3385          | ENSG00000133083 | DCLK1        |
| NR4A2_Medium | chr13   | 36126395  | 36126795  | Promoter (4-5kb)  | 13      | 35768963  | 36131306  | 4511          | ENSG00000133083 | DCLK1        |
| NR4A2_Medium | chr13   | 36359596  | 36359996  | Promoter (2-3kb)  | 13      | 36362119  | 36366781  | -2123         | ENSG00000120664 | SPART-AS1    |
| NR4A2_Medium | chr13   | 38989402  | 38989802  | Promoter (1-2kb)  | 13      | 38965925  | 38990831  | 1029          | ENSG00000133115 | STOML3       |
| NR4A2_Medium | chr13   | 40536212  | 40536612  | Promoter (<=1kb)  | 13      | 40458903  | 40535807  | -405          | ENSG00000215483 | LINC00598    |
| NR4A2_Medium | chr13   | 40567102  | 40567502  | Promoter (4-5kb)  | 13      | 40560759  | 40562764  | -4338         | ENSG00000150907 | FOXO1        |
| NR4A2_Medium | chr13   | 41189014  | 41189414  | Promoter (5-6kb)  | 13      | 41189834  | 41194569  | 5155          | ENSG00000120696 | KBTBD7       |
| NR4A2_Medium | chr13   | 41197906  | 41198306  | Promoter (3-4kb)  | 13      | 41189834  | 41194569  | -3337         | ENSG00000120696 | KBTBD7       |
| NR4A2_Medium | chr13   | 42348443  | 42348843  | Promoter (9-10kb) | 13      | 42339188  | 42444144  | 9255          | ENSG00000283554 | LINC02341    |
| NR4A2_Medium | chr13   | 42848017  | 42848417  | Promoter (5-6kb)  | 13      | 42842414  | 42842887  | -5130         | NA              | LINC00428    |
| NR4A2_Medium | chr13   | 42983840  | 42984240  | Promoter (6-7kb)  | 13      | 42926377  | 42991231  | 6991          | ENSG00000133106 | EPST11       |
| NR4A2_Medium | chr13   | 44023035  | 44023435  | Promoter (<=1kb)  | 13      | 44022459  | 44027179  | 576           | ENSG00000233725 | NRAD1        |
| NR4A2_Medium | chr13   | 44373083  | 44373483  | Promoter (<=1kb)  | 13      | 44373665  | 44397441  | -182          | ENSG00000151778 | SERP2        |
| NR4A2_Medium | chr13   | 45460146  | 45460546  | Promoter (4-5kb)  | 13      | 45464898  | 45465658  | -4352         | ENSG00000136152 | COG3         |
| NR4A2_Medium | chr13   | 46298396  | 46298796  | Promoter (<=1kb)  | 13      | 46296445  | 46297844  | -552          | ENSG00000261097 | LINC00563    |
| NR4A2_Medium | chr13   | 46511849  | 46512249  | Promoter (3-4kb)  | 13      | 46455132  | 46515958  | 3709          | ENSG00000231817 | LINC01198    |
| NR4A2_Medium | chr13   | 46516562  | 46516962  | Promoter (<=1kb)  | 13      | 46455132  | 46515958  | -604          | ENSG00000231817 | LINC01198    |
| NR4A2_Medium | chr13   | 46678943  | 46679343  | Promoter (<=1kb)  | 13      | 46679836  | 46692577  | -493          | ENSG00000136141 | LRCH1        |
| NR4A2_Medium | chr13   | 47929471  | 47929871  | Promoter (2-3kb)  | 13      | 47930153  | 47932622  | 2751          | ENSG00000260388 | LINC00562    |
| NR4A2_Medium | chr13   | 48230377  | 48230777  | Promoter (1-2kb)  | 13      | 48232612  | 48261875  | -1835         | ENSG00000136156 | ITM2B        |
| NR4A2_Medium | chr13   | 48384544  | 48384944  | Promoter (3-4kb)  | 13      | 48381250  | 48599436  | 3294          | ENSG00000139687 | RB1          |
| NR4A2_Medium | chr13   | 49456974  | 49457374  | Promoter (2-3kb)  | 13      | 49459908  | 49495002  | -2534         | ENSG00000136169 | SETDB2       |
| NR4A2_Medium | chr13   | 49633669  | 49634069  | Promoter (5-6kb)  | 13      | 49628523  | 49632237  | 5146          | ENSG00000152213 | ARL11        |
| NR4A2_Medium | chr13   | 49884126  | 49884526  | Promoter (6-7kb)  | 13      | 49890591  | 49892998  | -6065         | ENSG00000181358 | CTAGE10P     |
| NR4A2_Medium | chr13   | 49891849  | 49892249  | Promoter (1-2kb)  | 13      | 49890591  | 49892998  | 1258          | ENSG00000181358 | CTAGE10P     |
| NR4A2_Medium | chr13   | 51771784  | 51772184  | Promoter (1-2kb)  | 13      | 51768615  | 51774124  | 1940          | ENSG00000102796 | DHRS12       |
| NR4A2_Medium | chr13   | 52178639  | 52179039  | Promoter (6-7kb)  | 13      | 52169095  | 52171826  | -6813         | ENSG00000243406 | MRPS31P5     |
| NR4A2_Medium | chr13   | 52424605  | 52425005  | Promoter (4-5kb)  | 13      | 52425770  | 52429367  | 4362          | ENSG00000136100 | VPS36        |
| NR4A2_Medium | chr13   | 54312406  | 54312806  | Promoter (<=1kb)  | 13      | 54311972  | 54312048  | -358          | ENSG00000283126 | MIR1297      |
| NR4A2_Medium | chr13   | 60014293  | 60014693  | Promoter (<=1kb)  | 13      | 60013306  | 60044357  | 987           | ENSG00000227528 | DIAPH3-AS1   |
| NR4A2_Medium | chr13   | 60170284  | 60170684  | Promoter (6-7kb)  | 13      | 59665583  | 60163928  | -6356         | ENSG00000139734 | DIAPH3       |
| NR4A2_Medium | chr13   | 60172600  | 60173000  | Promoter (8-9kb)  | 13      | 59665583  | 60163928  | -8672         | ENSG00000139734 | DIAPH3       |
| NR4A2_Medium | chr13   | 64077316  | 64077716  | Promoter (1-2kb)  | 13      | 63851197  | 64076044  | -1272         | ENSG00000227674 | LINC00355    |
| NR4A2_Medium | chr13   | 67328946  | 67329346  | Promoter (2-3kb)  | 13      | 67326177  | 67379994  | 2769          | ENSG00000230040 | LINC00364    |
| NR4A2_Medium | chr13   | 71016644  | 71017044  | Promoter (1-2kb)  | 13      | 71015101  | 71168414  | 1543          | ENSG00000226846 | LINC00348    |
| NR4A2_Medium | chr13   | 75323178  | 75323578  | Promoter (2-3kb)  | 13      | 75312782  | 75326250  | 2672          | ENSG00000136111 | TBC1D4       |
| NR4A2_Medium | chr13   | 75528517  | 75528917  | Promoter (1-2kb)  | 13      | 75526436  | 75530504  | 1587          | ENSG00000188243 | COMMD6       |
| NR4A2_Medium | chr13   | 77106492  | 77106892  | Promoter (8-9kb)  | 13      | 77093286  | 77097646  | -8846         | ENSG00000005810 | MYCBP2       |
| NR4A2_Medium | chr13   | 77278739  | 77279139  | Promoter (5-6kb)  | 13      | 77270031  | 77273511  | -5228         | ENSG00000005810 | MYCBP2       |
| NR4A2_Medium | chr13   | 77711624  | 77712024  | Promoter (7-8kb)  | 13      | 77719598  | 77764229  | -7574         | ENSG00000139737 | SLAIN1       |
| NR4A2_Medium | chr13   | 78063846  | 78064246  | Promoter (8-9kb)  | 13      | 78055155  | 78578813  | 8691          | ENSG00000234377 | OBI1-AS1     |
| NR4A2_Medium | chr13   | 78586902  | 78587302  | Promoter (8-9kb)  | 13      | 78578476  | 78617328  | 8426          | ENSG00000234377 | OBI1-AS1     |
| NR4A2_Medium | chr13   | 79808291  | 79808691  | Promoter (3-4kb)  | 13      | 79804418  | 79805685  | 3873          | ENSG00000229011 | LINC01038    |
| NR4A2_Medium | chr13   | 80341643  | 80342043  | Promoter (<=1kb)  | 13      | 80335976  | 80341126  | -517          | ENSG00000136158 | SPRY2        |
| NR4A2_Medium | chr13   | 85354666  | 85355066  | Promoter (8-9kb)  | 13      | 85363601  | 85544570  | -8535         | ENSG00000226317 | LINC00351    |
| NR4A2_Medium | chr13   | 85796092  | 85796492  | Promoter (2-3kb)  | 13      | 85792790  | 85799419  | 2927          | ENSG00000184564 | SLITRK6      |
| NR4A2_Medium | chr13   | 89500155  | 89500555  | Promoter (<=1kb)  | 13      | 89477608  | 89500509  | 0             | ENSG00000226037 | LINC01040    |
| NR4A2_Medium | chr13   | 91346154  | 91346554  | Promoter (1-2kb)  | 13      | 91347820  | 91352402  | -1266         | ENSG00000215417 | MIR17HG      |
| NR4A2_Medium | chr13   | 93833478  | 93833878  | Promoter (2-3kb)  | 13      | 93818424  | 93836144  | 2266          | NA              | GPC6-AS2     |
| NR4A2_Medium | chr13   | 95057803  | 95058203  | Promoter (3-4kb)  | 13      | 95021676  | 95053933  | -3870         | ENSG00000125257 | ABCC4        |
| NR4A2_Medium | chr13   | 95058728  | 95059128  | Promoter (4-5kb)  | 13      | 95021676  | 95053933  | -4795         | ENSG00000125257 | ABCC4        |
| NR4A2_Medium | chr13   | 98144087  | 98144487  | Promoter (<=1kb)  | 13      | 98143480  | 98245304  | 607           | ENSG00000152767 | FARP1        |
| NR4A2_Medium | chr13   | 98207337  | 98207737  | Promoter (<=1kb)  | 13      | 98208524  | 98208600  | -787          | ENSG00000263399 | MIR3170      |
| NR4A2_Medium | chr13   | 100108978 | 100109378 | Promoter (6-7kb)  | 13      | 100102899 | 100530437 | 6079          | ENSG00000175198 | PCCA         |
| NR4A2_Medium | chr13   | 100672880 | 100673280 | Promoter (1-2kb)  | 13      | 100604871 | 100674774 | 1494          | ENSG00000125247 | TMTC4        |
| NR4A2_Medium | chr13   | 101418602 | 101419002 | Promoter (2-3kb)  | 13      | 101053776 | 101416508 | -2094         | ENSG00000102452 | NALCN        |
| NR4A2_Medium | chr13   | 102675084 | 102675484 | Promoter (1-2kb)  | 13      | 102673836 | 102678232 | 1248          | ENSG00000134900 | TPP2         |
| NR4A2_Medium | chr13   | 102780817 | 102781217 | Promoter (7-8kb)  | 13      | 102766110 | 102773811 | -7006         | ENSG00000151287 | TEX30        |
| NR4A2_Medium | chr13   | 102828545 | 102828945 | Promoter (8-9kb)  | 13      | 102820387 | 102840163 | 8158          | ENSG00000134897 | BIVM         |
| NR4A2_Medium | chr13   | 102892955 | 102893355 | Promoter (1-2kb)  | 13      | 102891311 | 102895685 | 1644          | ENSG00000250878 | METTL21EP    |
| NR4A2_Medium | chr13   | 103073633 | 103074033 | Promoter (7-8kb)  | 13      | 103043998 | 103066417 | -7216         | ENSG00000125255 | SLC10A2      |
| NR4A2_Medium | chr13   | 110419950 | 110420350 | Promoter (4-5kb)  | 13      | 110424802 | 110429842 | -4452         | ENSG00000134871 | COL4A2       |
| NR4A2_Medium | chr13   | 110464580 | 110464980 | Promoter (1-2kb)  | 13      | 110456396 | 110463287 | -1293         | ENSG00000224821 | COL4A2-AS2   |
| NR4A2_Medium | chr13   | 110877779 | 110878179 | Promoter (7-8kb)  | 13      | 110863987 | 110870251 | -7528         | ENSG00000255874 | PRECSIT      |
| NR4A2_Medium | chr13   | 111589927 | 111590327 | Promoter (5-6kb)  | 13      | 111596009 | 111642079 | -5682         | ENSG00000215881 | LINC02337    |
| NR4A2_Medium | chr13   | 112107869 | 112108269 | Promoter (<=1kb)  | 13      | 112107119 | 112108015 | 750           | ENSG00000224243 | SOX1-OT      |
| NR4A2_Medium | chr13   | 112900426 | 112900826 | Promoter (6-7kb)  | 13      | 112894378 | 113096861 | 6048          | ENSG00000126217 | MCF2L        |
| NR4A2_Medium | chr13   | 113056462 | 113057180 | Promoter (7-8kb)  | 13      | 113064312 | 113070394 | -7132         | ENSG00000126217 | MCF2L        |
| NR4A2_Medium | chr13   | 113112205 | 113112605 | Promoter (1-2kb)  | 13      | 113110679 | 113114903 | 1526          | ENSG00000057593 | F7           |
| NR4A2_Medium | chr13   | 113119070 | 113119470 | Promoter (3-4kb)  | 13      | 113122799 | 113149529 | -3329         | ENSG00000126218 | F10          |
| NR4A2_Medium | chr13   | 113487206 | 113487606 | Promoter (3-4kb)  | 13      | 113459312 | 113490608 | 3002          | ENSG00000150401 | DCUN1D2      |
| NR4A2_Medium | chr13   | 113506079 | 113506479 | Promoter (6-7kb)  | 13      | 113500024 | 113506062 | 6055          | ENSG00000150403 | TMCO3        |
| NR4A2_Medium | chr13   | 113593064 | 113593464 | Promoter (7-8kb)  | 13      | 113585426 | 113633287 | 7638          | ENSG00000198176 | TFDP1        |
| NR4A2_Medium | chr13   | 113774465 | 113774865 | Promoter (6-7kb)  | 13      | 113768136 | 113799857 | 6329          | ENSG00000184497 | TMEM255B     |
| NR4A2_Medium | chr13   | 113774899 | 113775299 | Promoter (6-7kb)  | 13      | 113768136 | 113799857 | 6763          | ENSG00000184497 | TMEM255B     |
| NR4A2_Medium | chr13   | 113795480 | 113795880 | Promoter (4-5kb)  | 13      | 113799888 | 113804890 | -4008         | ENSG00000184497 | TMEM255B     |
| NR4A2_Medium | chr13   | 113841318 | 113841718 | Promoter (5-6kb)  | 13      | 113820552 | 113836044 | -5274         | ENSG00000183087 | GAS6         |
| NR4A2_Medium | chr14   | 20691323  | 20691723  | Promoter (2-3kb)  | 14      | 20688782  | 20700602  | 2541          | ENSG00000258818 | RNASE4       |
| NR4A2_Medium | chr14   | 20774060  | 20774460  | Promoter (5-6kb)  | 14      | 20768404  | 20770948  | 5656          | ENSG00000181552 | EDDM3B       |
| NR4A2_Medium | chr14   | 21479206  | 21479606  | Promoter (1-2kb)  | 14      | 21477264  | 21487693  | 1942          | ENSG00000092203 | TOX4         |
| NR4A2_Medium | chr14   | 22436010  | 22436410  | Promoter (3-4kb)  | 14      | 22379466  | 22432740  | -3270         | ENSG00000251002 | LOC105370401 |
| NR4A2_Medium | chr14   | 22898511  | 22898911  | Promoter (3-4kb)  | 14      | 22901672  | 22902241  | 3330          | ENSG00000100461 | RBM23        |
| NR4A2_Medium | chr14   | 22916718  | 22917118  | Promoter (<=1kb)  | 14      | 22909483  | 22917556  | 438           | ENSG00000100461 | RBM23        |
| NR4A2_Medium | chr14   | 22968785  | 22969185  | Promoter (6-7kb)  | 14      | 22974655  | 22975295  | 6110          |                 |              |

| Condition    | peakChr | peakStart | peakEnd  | annotation        | geneChr | geneStart | geneEnd  | distanceToTSS | geneID          | geneSymbol   |
|--------------|---------|-----------|----------|-------------------|---------|-----------|----------|---------------|-----------------|--------------|
| NR4A2_Medium | chr14   | 37161927  | 37162327 | Promoter (9-10kb) | 14      | 37171888  | 37173811 | -9561         | ENSG00000258708 | SLC25A21-AS1 |
| NR4A2_Medium | chr14   | 38263128  | 38263528 | Promoter (7-8kb)  | 14      | 38254000  | 38256093 | -7035         | ENSG00000176435 | CLEC14A      |
| NR4A2_Medium | chr14   | 39225350  | 39225750 | Promoter (4-5kb)  | 14      | 39230231  | 39240588 | -4481         | ENSG00000150527 | MIA2         |
| NR4A2_Medium | chr14   | 45096400  | 45096800 | Promoter (<=1kb)  | 14      | 45096906  | 45110176 | -106          | ENSG00000185246 | PRPF39       |
| NR4A2_Medium | chr14   | 49701873  | 49702273 | Promoter (8-9kb)  | 14      | 49693129  | 49740177 | 8744          | ENSG00000197776 | KLHDC1       |
| NR4A2_Medium | chr14   | 50171377  | 50171777 | Promoter (8-9kb)  | 14      | 50155892  | 50180654 | 8877          | ENSG00000100485 | SOS2         |
| NR4A2_Medium | chr14   | 50337475  | 50337875 | Promoter (1-2kb)  | 14      | 50330112  | 50339029 | 1154          | ENSG00000100490 | CDKL1        |
| NR4A2_Medium | chr14   | 50476659  | 50477059 | Promoter (6-7kb)  | 14      | 50462693  | 50483149 | 6090          | ENSG0000012983  | MAP4K5       |
| NR4A2_Medium | chr14   | 50564389  | 50564789 | Promoter (3-4kb)  | 14      | 50475092  | 50561126 | -3263         | ENSG0000012983  | MAP4K5       |
| NR4A2_Medium | chr14   | 50624765  | 50625165 | Promoter (3-4kb)  | 14      | 50628166  | 50632320 | -3001         | ENSG00000198513 | ATL1         |
| NR4A2_Medium | chr14   | 50641980  | 50642380 | Promoter (2-3kb)  | 14      | 50635113  | 50644809 | 2429          | ENSG00000151748 | SAV1         |
| NR4A2_Medium | chr14   | 51365567  | 51365967 | Promoter (4-5kb)  | 14      | 51360718  | 51365545 | 4849          | NA              | LINC00640    |
| NR4A2_Medium | chr14   | 51844082  | 51844482 | Promoter (2-3kb)  | 14      | 51847126  | 51979342 | -2644         | ENSG00000186469 | GNB2         |
| NR4A2_Medium | chr14   | 53956711  | 53957111 | Promoter (<=1kb)  | 14      | 53949736  | 53956811 | 0             | ENSG00000125378 | BMP4         |
| NR4A2_Medium | chr14   | 54518359  | 54518759 | Promoter (8-9kb)  | 14      | 54510185  | 54531117 | 8174          | ENSG00000100532 | CGRRF1       |
| NR4A2_Medium | chr14   | 55385561  | 55385961 | Promoter (5-6kb)  | 14      | 55366392  | 55391302 | 5341          | ENSG00000126775 | ATG14        |
| NR4A2_Medium | chr14   | 55674854  | 55675254 | Promoter (<=1kb)  | 14      | 55675050  | 55683723 | 0             | ENSG00000126777 | KTN1         |
| NR4A2_Medium | chr14   | 55686417  | 55686817 | Promoter (6-7kb)  | 14      | 55679663  | 55684253 | 6754          | ENSG00000126777 | KTN1         |
| NR4A2_Medium | chr14   | 55775792  | 55776192 | Promoter (9-10kb) | 14      | 55766245  | 55767717 | 9547          | ENSG00000177350 | RPL13AP3     |
| NR4A2_Medium | chr14   | 57792472  | 57792872 | Promoter (6-7kb)  | 14      | 57594045  | 57799507 | 6635          | ENSG00000151812 | SLC35F4      |
| NR4A2_Medium | chr14   | 58189998  | 58190398 | Promoter (9-10kb) | 14      | 58200080  | 58234760 | -9682         | ENSG00000131966 | ACTR10       |
| NR4A2_Medium | chr14   | 58258160  | 58258560 | Promoter (<=1kb)  | 14      | 58257925  | 58272006 | 235           | ENSG00000100567 | PSMA3        |
| NR4A2_Medium | chr14   | 58259257  | 58259657 | Promoter (1-2kb)  | 14      | 58257925  | 58272006 | 1332          | ENSG00000100567 | PSMA3        |
| NR4A2_Medium | chr14   | 58542845  | 58543245 | Promoter (2-3kb)  | 14      | 58539867  | 58548054 | 2978          | ENSG00000100578 | KIAA0586     |
| NR4A2_Medium | chr14   | 59614808  | 59615208 | Promoter (7-8kb)  | 14      | 59596014  | 59607607 | -7201         | ENSG00000139970 | RTN1         |
| NR4A2_Medium | chr14   | 59644721  | 59645121 | Promoter (1-2kb)  | 14      | 59646962  | 59647020 | 1899          | ENSG00000263629 | MIR5586      |
| NR4A2_Medium | chr14   | 60175409  | 60175809 | Promoter (5-6kb)  | 14      | 60144120  | 60169856 | -5553         | ENSG00000100612 | DHRS7        |
| NR4A2_Medium | chr14   | 61685879  | 61686279 | Promoter (9-10kb) | 14      | 61695513  | 61721824 | -9234         | ENSG00000100644 | HIF1A        |
| NR4A2_Medium | chr14   | 62088971  | 62089371 | Promoter (9-10kb) | 14      | 62079347  | 62101709 | 9624          | ENSG00000139973 | SYT16        |
| NR4A2_Medium | chr14   | 63045591  | 63045991 | Promoter (<=1kb)  | 14      | 62699464  | 63045458 | -133          | ENSG00000140015 | KCNH5        |
| NR4A2_Medium | chr14   | 63103181  | 63103581 | Promoter (1-2kb)  | 14      | 62949818  | 63102037 | -1144         | ENSG00000140015 | KCNH5        |
| NR4A2_Medium | chr14   | 63326297  | 63326697 | Promoter (7-8kb)  | 14      | 63312835  | 63318935 | -7362         | ENSG00000179600 | GPHB5        |
| NR4A2_Medium | chr14   | 64330694  | 64331094 | Promoter (5-6kb)  | 14      | 64329431  | 64336569 | 5475          | ENSG00000140009 | ESR2         |
| NR4A2_Medium | chr14   | 64370091  | 64370491 | Promoter (8-9kb)  | 14      | 64346135  | 64379318 | 8827          | NA              | TEX21P       |
| NR4A2_Medium | chr14   | 64414383  | 64414783 | Promoter (<=1kb)  | 14      | 64415638  | 64421598 | -855          | ENSG00000100714 | MTHFD1       |
| NR4A2_Medium | chr14   | 64735718  | 64736118 | Promoter (1-2kb)  | 14      | 64738015  | 64744343 | -1897         | ENSG00000126822 | PLEKHG3      |
| NR4A2_Medium | chr14   | 64775825  | 64776225 | Promoter (6-7kb)  | 14      | 64748937  | 64782550 | 6325          | ENSG00000070182 | SPTB         |
| NR4A2_Medium | chr14   | 64822208  | 64822608 | Promoter (<=1kb)  | 14      | 64746284  | 64823148 | 540           | ENSG00000070182 | SPTB         |
| NR4A2_Medium | chr14   | 65633150  | 65633550 | Promoter (2-3kb)  | 14      | 65636516  | 65721912 | -2966         | ENSG00000033170 | FUT8         |
| NR4A2_Medium | chr14   | 67438928  | 67439328 | Promoter (2-3kb)  | 14      | 67441855  | 67441930 | 2602          | ENSG00000265993 | MIR5694      |
| NR4A2_Medium | chr14   | 67489539  | 67489939 | Promoter (<=1kb)  | 14      | 67473685  | 67488732 | -807          | ENSG00000198133 | TMEM229B     |
| NR4A2_Medium | chr14   | 67572517  | 67572917 | Promoter (<=1kb)  | 14      | 67571788  | 67573376 | 729           | ENSG00000054690 | PLEKHH1      |
| NR4A2_Medium | chr14   | 67579123  | 67579523 | Promoter (<=1kb)  | 14      | 67579294  | 67580307 | 0             | ENSG00000054690 | PLEKHH1      |
| NR4A2_Medium | chr14   | 67736604  | 67737004 | Promoter (9-10kb) | 14      | 67727164  | 67729746 | 9440          | ENSG00000139988 | RDH12        |
| NR4A2_Medium | chr14   | 67990273  | 67990673 | Promoter (9-10kb) | 14      | 68000279  | 68497257 | -9606         | ENSG00000182185 | RAD51B       |
| NR4A2_Medium | chr14   | 68898884  | 68899284 | Promoter (8-9kb)  | 14      | 68879046  | 68890142 | -8742         | ENSG00000072110 | ACTN1        |
| NR4A2_Medium | chr14   | 69484611  | 69485011 | Promoter (<=1kb)  | 14      | 69484692  | 69503690 | 0             | ENSG00000175985 | PLEKHD1      |
| NR4A2_Medium | chr14   | 70189433  | 70189833 | Promoter (<=1kb)  | 14      | 70044220  | 70189070 | -363          | ENSG00000100678 | SLC8A3       |
| NR4A2_Medium | chr14   | 70245350  | 70245750 | Promoter (1-2kb)  | 14      | 70245491  | 70247660 | 1910          | ENSG00000235812 | ADAM21P1     |
| NR4A2_Medium | chr14   | 70255705  | 70256105 | Promoter (7-8kb)  | 14      | 70245753  | 70247801 | -7904         | ENSG00000235812 | ADAM21P1     |
| NR4A2_Medium | chr14   | 70330899  | 70331299 | Promoter (2-3kb)  | 14      | 70326068  | 70328230 | -2669         | ENSG00000133983 | COX16        |
| NR4A2_Medium | chr14   | 70355854  | 70356254 | Promoter (3-4kb)  | 14      | 70326282  | 70359590 | 3336          | ENSG00000133983 | COX16        |
| NR4A2_Medium | chr14   | 70585825  | 70586225 | Promoter (5-6kb)  | 14      | 70584665  | 70591814 | 5589          | ENSG00000133997 | MED6         |
| NR4A2_Medium | chr14   | 71050803  | 71051203 | Promoter (<=1kb)  | 14      | 71050658  | 71060742 | 145           | ENSG00000100731 | PCNX1        |
| NR4A2_Medium | chr14   | 71529501  | 71529901 | Promoter (<=1kb)  | 14      | 71529325  | 71741229 | 176           | ENSG00000197555 | SIPA1L1      |
| NR4A2_Medium | chr14   | 72517147  | 72517547 | Promoter (<=1kb)  | 14      | 72516820  | 72516898 | 327           | ENSG00000273830 | MIR7843      |
| NR4A2_Medium | chr14   | 73162489  | 73162889 | Promoter (4-5kb)  | 14      | 73167829  | 73220401 | -4940         | ENSG00000080815 | PSEN1        |
| NR4A2_Medium | chr14   | 73246393  | 73246793 | Promoter (<=1kb)  | 14      | 73242651  | 73245979 | -414          | NA              | LOC101928123 |
| NR4A2_Medium | chr14   | 73355839  | 73356239 | Promoter (<=1kb)  | 14      | 73275210  | 73355769 | -70           | ENSG00000133961 | NUMB         |
| NR4A2_Medium | chr14   | 73416838  | 73417238 | Promoter (6-7kb)  | 14      | 73284251  | 73410071 | -6767         | ENSG00000133961 | NUMB         |
| NR4A2_Medium | chr14   | 73658022  | 73658422 | Promoter (<=1kb)  | 14      | 73658847  | 73689517 | -425          | ENSG00000119661 | DNAL1        |
| NR4A2_Medium | chr14   | 74089022  | 74089422 | Promoter (3-4kb)  | 14      | 74085505  | 74097860 | 3517          | ENSG00000205659 | LIN52        |
| NR4A2_Medium | chr14   | 74718049  | 74718449 | Promoter (2-3kb)  | 14      | 74715672  | 74732793 | 2377          | ENSG00000119616 | FCF1         |
| NR4A2_Medium | chr14   | 74918336  | 74918736 | Promoter (<=1kb)  | 14      | 74909969  | 74918550 | 0             | ENSG00000198208 | RPS6KL1      |
| NR4A2_Medium | chr14   | 75007238  | 75007638 | Promoter (<=1kb)  | 14      | 75006304  | 75009563 | 934           | ENSG00000119718 | EIF2B2       |
| NR4A2_Medium | chr14   | 75638802  | 75639202 | Promoter (1-2kb)  | 14      | 75640732  | 75641976 | -1530         | ENSG00000119686 | FLVCR2       |
| NR4A2_Medium | chr14   | 75963001  | 75963401 | Promoter (2-3kb)  | 14      | 75959289  | 75960957 | -2044         | ENSG00000119699 | TGFB3        |
| NR4A2_Medium | chr14   | 75974490  | 75974890 | Promoter (3-4kb)  | 14      | 75960861  | 75970790 | -3700         | ENSG00000119699 | TGFB3        |
| NR4A2_Medium | chr14   | 75978897  | 75979297 | Promoter (1-2kb)  | 14      | 75963062  | 75980993 | 1696          | ENSG00000119699 | TGFB3        |
| NR4A2_Medium | chr14   | 76400160  | 76400560 | Promoter (6-7kb)  | 14      | 76407402  | 76501835 | -6842         | ENSG00000119715 | ESRRB        |
| NR4A2_Medium | chr14   | 77085036  | 77085436 | Promoter (8-9kb)  | 14      | 77073907  | 77076392 | -8644         | ENSG00000258819 | LINC02289    |
| NR4A2_Medium | chr14   | 77187993  | 77188393 | Promoter (6-7kb)  | 14      | 77181827  | 77218963 | 6166          | ENSG00000165548 | TMEM63C      |
| NR4A2_Medium | chr14   | 77243226  | 77243626 | Promoter (8-9kb)  | 14      | 77251709  | 77256794 | -8083         | ENSG00000165548 | TMEM63C      |
| NR4A2_Medium | chr14   | 78165527  | 78165927 | Promoter (4-5kb)  | 14      | 78170373  | 79862033 | -4446         | ENSG00000021645 | NRXN3        |
| NR4A2_Medium | chr14   | 79308468  | 79308868 | Promoter (5-6kb)  | 14      | 79314051  | 79861959 | -5183         | ENSG00000021645 | NRXN3        |
| NR4A2_Medium | chr14   | 79322064  | 79322464 | Promoter (8-9kb)  | 14      | 79314051  | 79861959 | 8013          | ENSG00000021645 | NRXN3        |
| NR4A2_Medium | chr14   | 80578606  | 80579006 | Promoter (1-2kb)  | 14      | 80490479  | 80580425 | 1419          | ENSG00000100629 | CEP128       |
| NR4A2_Medium | chr14   | 81317386  | 81317786 | Promoter (5-6kb)  | 14      | 81278476  | 81323683 | 5897          | ENSG00000140022 | STON2        |
| NR4A2_Medium | chr14   | 85423157  | 85423557 | Promoter (8-9kb)  | 14      | 85414333  | 85419861 | 8824          | ENSG00000259107 | LINC00911    |
| NR4A2_Medium | chr14   | 88269969  | 88270369 | Promoter (<=1kb)  | 14      | 88184893  | 88270911 | 542           | ENSG00000100433 | KCNK10       |
| NR4A2_Medium | chr14   | 88724519  | 88724919 | Promoter (9-10kb) | 14      | 88621757  | 88715130 | -9389         | ENSG00000165521 | EML5         |
| NR4A2_Medium | chr14   | 89624733  | 89625133 | Promoter (5-6kb)  | 14      | 89162362  | 89619149 | -5584         | ENSG00000053254 | FOXN3        |
| NR4A2_Medium | chr14   | 90268209  | 90268609 | Promoter (<=1kb)  | 14      | 90267476  | 90272624 | 733           | ENSG00000100764 | PSMC1        |
| NR4A2_Medium | chr14   | 90611041  | 90611441 | Promoter (<=1kb)  | 14      | 90541318  | 90610776 | -265          | ENSG00000165914 | TTC7B        |
| NR4A2_Medium | chr14   | 91260043  | 91260443 | Promoter (6-7kb)  | 14      | 91232532  | 91253925 | -6118         | ENSG00000119714 | GPR68        |
| NR4A2_Medium | chr14   | 91405524  | 91405924 | Promoter (2-3kb)  | 14      | 91342143  | 91408758 | 2834          | ENSG00000151333 | CCDC88C      |
| NR4A2_Medium | chr14   | 92553193  | 92553593 | Promoter (2-3kb)  | 14      | 92555840  | 92616028 | -2247         | ENSG00000100599 | RIN3         |
| NR4A2_Medium | chr14   | 94519505  | 94519905 | Promoter (1-2kb)  | 14      | 94487283  | 94517844 | -1661         | ENSG00000165953 | SERPINA12    |
| NR4A2_Medium | chr14   | 94586150  | 94586550 | Promoter (4-5kb)  | 14      | 94581971  | 94587435 | 4179          | ENSG00000188488 | SERPINA5     |
| NR4A2_Medium | chr14   | 94637787  | 94638187 | Promoter (2-3kb)  | 14      | 94640725  | 94646994 | -2538         | ENSG00000187483 | SERPINA13P   |
| NR4A2_Medium | chr14   | 94650942  | 94651402 | Promoter (9-10kb) | 14      | 94641318  | 94645026 | 9624          | ENSG00000187483 | SERPINA13P   |
| NR4A2_Medium | chr14   | 95455568  | 95455968 | Promoter (<=1kb)  | 14      | 95417604  | 95456189 | 221           | ENSG00000176438 | SYNE3        |
| NR4A2_Medium | chr14   | 96849188  | 96849588 | Promoter (3-4kb)  | 14      | 96852888  | 96931722 | -3300         | ENSG00000100749 | VRK1         |
| NR4A2_Medium | chr14   | 97968701  | 97969101 | Promoter (8-9kb)  | 14      | 97933062  | 97978056 | 8955          | ENSG00000246223 | LINC         |



| Condition    | peakChr | peakStart | peakEnd   | annotation        | geneChr | geneStart | geneEnd   | distanceToTSS | geneID          | geneSymbol   |
|--------------|---------|-----------|-----------|-------------------|---------|-----------|-----------|---------------|-----------------|--------------|
| NR4A2_Medium | chr14   | 100480647 | 100481047 | Promoter (4-5kb)  | 14      | 100476474 | 100530007 | 4173          | ENSG00000176473 | WDR25        |
| NR4A2_Medium | chr14   | 100503535 | 100503935 | Promoter (<=1kb)  | 14      | 100503700 | 100530021 | 0             | ENSG00000176473 | WDR25        |
| NR4A2_Medium | chr14   | 100890287 | 100890687 | Promoter (4-5kb)  | 14      | 100894770 | 100906968 | -4083         | NA              | MEG8         |
| NR4A2_Medium | chr14   | 101027955 | 101028355 | Promoter (<=1kb)  | 14      | 101027100 | 101027183 | 855           | ENSG00000207762 | MIR329-2     |
| NR4A2_Medium | chr14   | 101130442 | 101130842 | Promoter (9-10kb) | 14      | 101120840 | 101123545 | 9602          | ENSG00000259004 | LINC02285    |
| NR4A2_Medium | chr14   | 101550424 | 101550824 | Promoter (4-5kb)  | 14      | 101552223 | 101555676 | 4852          | ENSG00000258498 | DIO3OS       |
| NR4A2_Medium | chr14   | 101553061 | 101553461 | Promoter (2-3kb)  | 14      | 101552223 | 101555676 | 2215          | ENSG00000258498 | DIO3OS       |
| NR4A2_Medium | chr14   | 101958293 | 101958693 | Promoter (5-6kb)  | 14      | 101964573 | 102011733 | -5880         | ENSG00000197102 | DYNC1H1      |
| NR4A2_Medium | chr14   | 102367700 | 102368100 | Promoter (4-5kb)  | 14      | 102363079 | 102465671 | 4621          | ENSG00000196663 | TECPR2       |
| NR4A2_Medium | chr14   | 102500517 | 102500917 | Promoter (2-3kb)  | 14      | 102497539 | 102498412 | 2978          | ENSG00000196663 | TECPR2       |
| NR4A2_Medium | chr14   | 102539103 | 102539503 | Promoter (<=1kb)  | 14      | 102539644 | 102539726 | -141          | ENSG00000266015 | MIR4309      |
| NR4A2_Medium | chr14   | 103082154 | 103082554 | Promoter (1-2kb)  | 14      | 103084210 | 103090027 | -1656         | ENSG00000283071 | LBHD2        |
| NR4A2_Medium | chr14   | 103134510 | 103134910 | Promoter (1-2kb)  | 14      | 103132748 | 103136682 | 1762          | ENSG00000185215 | TNFAIP2      |
| NR4A2_Medium | chr14   | 103387880 | 103388280 | Promoter (1-2kb)  | 14      | 103386239 | 103451995 | 1641          | ENSG00000075413 | MARK3        |
| NR4A2_Medium | chr14   | 103736198 | 103736598 | Promoter (1-2kb)  | 14      | 103733753 | 103737696 | 1098          | ENSG00000088808 | PPP1R13B     |
| NR4A2_Medium | chr14   | 104089643 | 104090043 | Promoter (3-4kb)  | 14      | 104093491 | 104105382 | -3448         | ENSG00000166183 | ASPG         |
| NR4A2_Medium | chr14   | 104104350 | 104104750 | Promoter (<=1kb)  | 14      | 104104929 | 104107233 | -179          | ENSG00000166183 | ASPG         |
| NR4A2_Medium | chr14   | 104114205 | 104114605 | Promoter (2-3kb)  | 14      | 104111621 | 104112708 | 2584          | ENSG00000166183 | ASPG         |
| NR4A2_Medium | chr14   | 104215256 | 104215700 | Promoter (7-8kb)  | 14      | 104223584 | 104288069 | -7884         | ENSG00000258913 | LINC02691    |
| NR4A2_Medium | chr14   | 104231881 | 104232281 | Promoter (8-9kb)  | 14      | 104223655 | 104244622 | 8226          | ENSG00000258913 | LINC02691    |
| NR4A2_Medium | chr14   | 104664865 | 104665265 | Promoter (<=1kb)  | 14      | 104661120 | 104665558 | 293           | ENSG00000260792 | LINC02280    |
| NR4A2_Medium | chr14   | 104685920 | 104686320 | Promoter (3-4kb)  | 14      | 104689606 | 104722535 | -3286         | ENSG00000203485 | INF2         |
| NR4A2_Medium | chr14   | 104699522 | 104699922 | Promoter (7-8kb)  | 14      | 104707864 | 104719605 | -7942         | ENSG00000203485 | INF2         |
| NR4A2_Medium | chr14   | 104742611 | 104743011 | Promoter (<=1kb)  | 14      | 104741943 | 104744963 | 668           | ENSG00000185100 | ADSS1        |
| NR4A2_Medium | chr14   | 104778439 | 104778839 | Promoter (<=1kb)  | 14      | 104769352 | 104778571 | 0             | ENSG00000142208 | AKT1         |
| NR4A2_Medium | chr14   | 104824405 | 104824805 | Promoter (3-4kb)  | 14      | 104821201 | 104823718 | 3204          | ENSG00000258701 | LINC00638    |
| NR4A2_Medium | chr14   | 104859323 | 104859723 | Promoter (5-6kb)  | 14      | 104865268 | 104896747 | -5545         | ENSG00000099814 | CEP170B      |
| NR4A2_Medium | chr14   | 104869027 | 104869427 | Promoter (3-4kb)  | 14      | 104865313 | 104896770 | 3714          | ENSG00000099814 | CEP170B      |
| NR4A2_Medium | chr14   | 104890574 | 104890974 | Promoter (2-3kb)  | 14      | 104893934 | 104895059 | -2960         | ENSG00000099814 | CEP170B      |
| NR4A2_Medium | chr14   | 105073579 | 105073979 | Promoter (8-9kb)  | 14      | 105049397 | 105065445 | -8134         | ENSG00000183484 | GPR132       |
| NR4A2_Medium | chr14   | 105143565 | 105143965 | Promoter (3-4kb)  | 14      | 105141755 | 105147358 | 3393          | ENSG00000184916 | JAG2         |
| NR4A2_Medium | chr14   | 105182541 | 105182941 | Promoter (1-2kb)  | 14      | 105175488 | 105181323 | -1218         | ENSG00000183828 | NUDT14       |
| NR4A2_Medium | chr14   | 105244133 | 105244533 | Promoter (1-2kb)  | 14      | 105221648 | 105242605 | -1528         | ENSG00000185024 | BRF1         |
| NR4A2_Medium | chr14   | 105327822 | 105328222 | Promoter (8-9kb)  | 14      | 105336425 | 105367250 | -8203         | ENSG00000179364 | PACS2        |
| NR4A2_Medium | chr14   | 105464025 | 105464425 | Promoter (<=1kb)  | 14      | 105463553 | 105467192 | 472           | ENSG00000182979 | MTA1         |
| NR4A2_Medium | chr15   | 25221577  | 25221977  | Promoter (<=1kb)  | 15      | 25222348  | 25222428  | -371          | ENSG00000200801 | SNORD115-28  |
| NR4A2_Medium | chr15   | 25225368  | 25225768  | Promoter (<=1kb)  | 15      | 25225203  | 25225284  | 165           | ENSG00000200987 | SNORD115-30  |
| NR4A2_Medium | chr15   | 25233919  | 25234319  | Promoter (<=1kb)  | 15      | 25234247  | 25234328  | 0             | ENSG00000201992 | SNORD115-35  |
| NR4A2_Medium | chr15   | 25236335  | 25236735  | Promoter (<=1kb)  | 15      | 25236088  | 25420336  | 247           | NA              | SNHG14       |
| NR4A2_Medium | chr15   | 25410961  | 25411361  | Promoter (1-2kb)  | 15      | 25375707  | 25409412  | -1549         | ENSG00000114062 | UBE3A        |
| NR4A2_Medium | chr15   | 26553193  | 26553593  | Promoter (3-4kb)  | 15      | 26548059  | 26550114  | -3079         | ENSG00000166206 | GABRB3       |
| NR4A2_Medium | chr15   | 26968037  | 26968437  | Promoter (2-3kb)  | 15      | 26971181  | 27541984  | -2744         | ENSG00000182256 | GABRG3       |
| NR4A2_Medium | chr15   | 27518987  | 27519387  | Promoter (<=1kb)  | 15      | 27519972  | 27530920  | -585          | ENSG00000182256 | GABRG3       |
| NR4A2_Medium | chr15   | 28105568  | 28105968  | Promoter (6-7kb)  | 15      | 27754875  | 28099315  | -6253         | ENSG00000104044 | OCA2         |
| NR4A2_Medium | chr15   | 33244460  | 33244860  | Promoter (<=1kb)  | 15      | 33243739  | 33244987  | 127           | NA              | TMCO5B       |
| NR4A2_Medium | chr15   | 33318052  | 33318452  | Promoter (6-7kb)  | 15      | 33311068  | 33503738  | 6984          | ENSG00000198838 | RYR3         |
| NR4A2_Medium | chr15   | 33833288  | 33833688  | Promoter (1-2kb)  | 15      | 33834979  | 33850669  | -1291         | ENSG00000198838 | RYR3         |
| NR4A2_Medium | chr15   | 34518594  | 34518994  | Promoter (9-10kb) | 15      | 34528290  | 34528371  | 9377          | ENSG00000221649 | MIR1233-1    |
| NR4A2_Medium | chr15   | 34590929  | 34591329  | Promoter (2-3kb)  | 15      | 34525282  | 34588503  | -2426         | ENSG00000215252 | GOLGA8B      |
| NR4A2_Medium | chr15   | 34764616  | 34765016  | Promoter (9-10kb) | 15      | 34755162  | 34790869  | 9454          | ENSG00000250007 | LOC101928174 |
| NR4A2_Medium | chr15   | 35368553  | 35368953  | Promoter (3-4kb)  | 15      | 35372256  | 35372364  | 3411          | ENSG00000265102 | MIR3942      |
| NR4A2_Medium | chr15   | 38036321  | 38036721  | Promoter (3-4kb)  | 15      | 38040393  | 38062340  | -3672         | ENSG00000259225 | LINC02345    |
| NR4A2_Medium | chr15   | 38461155  | 38461555  | Promoter (2-3kb)  | 15      | 38464149  | 38470662  | -2594         | ENSG00000171262 | FAM98B       |
| NR4A2_Medium | chr15   | 39245432  | 39245832  | Promoter (4-5kb)  | 15      | 39250684  | 39254845  | -4852         | ENSG00000175746 | C15orf54     |
| NR4A2_Medium | chr15   | 39832763  | 39833163  | Promoter (3-4kb)  | 15      | 39800949  | 39829276  | -3487         | ENSG00000166073 | GPR176       |
| NR4A2_Medium | chr15   | 40013945  | 40014345  | Promoter (6-7kb)  | 15      | 40020526  | 40022597  | -6181         | ENSG00000128829 | EIF2AK4      |
| NR4A2_Medium | chr15   | 40044227  | 40044627  | Promoter (4-5kb)  | 15      | 40039349  | 40057000  | 4878          | ENSG00000248508 | SRP14-AS1    |
| NR4A2_Medium | chr15   | 40265780  | 40266180  | Promoter (<=1kb)  | 15      | 40266014  | 40266982  | 0             | ENSG00000137843 | PAK6         |
| NR4A2_Medium | chr15   | 40267291  | 40267691  | Promoter (<=1kb)  | 15      | 40266612  | 40272354  | 679           | ENSG00000137843 | PAK6         |
| NR4A2_Medium | chr15   | 40284638  | 40285038  | Promoter (2-3kb)  | 15      | 40281444  | 40282586  | -2052         | ENSG00000230778 | ANKRD63      |
| NR4A2_Medium | chr15   | 40327560  | 40327960  | Promoter (3-4kb)  | 15      | 40323692  | 40326715  | 3868          | ENSG00000259330 | INAFM2       |
| NR4A2_Medium | chr15   | 40418472  | 40418872  | Promoter (2-3kb)  | 15      | 40416167  | 40424473  | 2305          | ENSG00000128928 | IVD          |
| NR4A2_Medium | chr15   | 40895847  | 40896247  | Promoter (1-2kb)  | 15      | 40894467  | 40902861  | 1380          | ENSG00000104142 | VPS18        |
| NR4A2_Medium | chr15   | 40934968  | 40935368  | Promoter (4-5kb)  | 15      | 40930880  | 40934921  | 4088          | ENSG00000128917 | DLL4         |
| NR4A2_Medium | chr15   | 40951641  | 40952041  | Promoter (<=1kb)  | 15      | 40952962  | 40955822  | -921          | ENSG00000128965 | CHAC1        |
| NR4A2_Medium | chr15   | 41184541  | 41184941  | Promoter (5-6kb)  | 15      | 41182735  | 41190370  | 5429          | ENSG00000178997 | EXD1         |
| NR4A2_Medium | chr15   | 41260892  | 41261292  | Promoter (3-4kb)  | 15      | 41256910  | 41272375  | 3982          | ENSG00000187446 | CHP1         |
| NR4A2_Medium | chr15   | 41320673  | 41321073  | Promoter (<=1kb)  | 15      | 41320794  | 41381021  | 0             | ENSG00000137804 | NUSAP1       |
| NR4A2_Medium | chr15   | 41421527  | 41421927  | Promoter (4-5kb)  | 15      | 41417132  | 41452994  | 4395          | ENSG00000137815 | RTF1         |
| NR4A2_Medium | chr15   | 41534050  | 41534450  | Promoter (<=1kb)  | 15      | 41527988  | 41533394  | -656          | ENSG00000103932 | RPAP1        |
| NR4A2_Medium | chr15   | 41539506  | 41539906  | Promoter (3-4kb)  | 15      | 41534805  | 41536375  | -3131         | ENSG00000103932 | RPAP1        |
| NR4A2_Medium | chr15   | 41812056  | 41812456  | Promoter (1-2kb)  | 15      | 41810761  | 41811326  | 1295          | ENSG00000137802 | MAPKBP1      |
| NR4A2_Medium | chr15   | 41968083  | 41968483  | Promoter (4-5kb)  | 15      | 41941604  | 41972552  | 4069          | ENSG00000103966 | EHD4         |
| NR4A2_Medium | chr15   | 42044605  | 42045005  | Promoter (6-7kb)  | 15      | 41981582  | 42051190  | 6185          | ENSG00000188089 | PLA2G4E      |
| NR4A2_Medium | chr15   | 42067474  | 42067874  | Promoter (4-5kb)  | 15      | 42067009  | 42071878  | 4004          | ENSG00000159337 | PLA2G4D      |
| NR4A2_Medium | chr15   | 42077012  | 42077412  | Promoter (5-6kb)  | 15      | 42067009  | 42071878  | -5134         | ENSG00000159337 | PLA2G4D      |
| NR4A2_Medium | chr15   | 42149747  | 42150147  | Promoter (2-3kb)  | 15      | 42146675  | 42147733  | -2014         | ENSG00000168907 | PLA2G4F      |
| NR4A2_Medium | chr15   | 42266169  | 42266569  | Promoter (5-6kb)  | 15      | 42239668  | 42271601  | 5032          | ENSG00000103978 | TMEM87A      |
| NR4A2_Medium | chr15   | 42539920  | 42540320  | Promoter (5-6kb)  | 15      | 42543967  | 42545449  | 5129          | ENSG00000180979 | LIRC57       |
| NR4A2_Medium | chr15   | 42682182  | 42682582  | Promoter (6-7kb)  | 15      | 42675496  | 42682213  | 6686          | ENSG00000159433 | STARD9       |
| NR4A2_Medium | chr15   | 42687707  | 42688107  | Promoter (1-2kb)  | 15      | 42689595  | 42720859  | -1488         | ENSG00000159433 | STARD9       |
| NR4A2_Medium | chr15   | 42901456  | 42901856  | Promoter (6-7kb)  | 15      | 42829941  | 42908275  | 6419          | ENSG00000128881 | TTBK2        |
| NR4A2_Medium | chr15   | 43522835  | 43523235  | Promoter (5-6kb)  | 15      | 43517608  | 43531611  | 5227          | ENSG00000166963 | MAP1A        |
| NR4A2_Medium | chr15   | 43855639  | 43856039  | Promoter (2-3kb)  | 15      | 43858507  | 43867018  | -2468         | ENSG00000092470 | WDR76        |
| NR4A2_Medium | chr15   | 43867066  | 43867466  | Promoter (8-9kb)  | 15      | 43858507  | 43867018  | 8559          | ENSG00000092470 | WDR76        |
| NR4A2_Medium | chr15   | 43931225  | 43931625  | Promoter (6-7kb)  | 15      | 43870761  | 43924314  | -6911         | ENSG00000171877 | FRMD5        |
| NR4A2_Medium | chr15   | 44400386  | 44400786  | Promoter (2-3kb)  | 15      | 44403051  | 44414761  | -2265         | ENSG00000166734 | GOLM2        |
| NR4A2_Medium | chr15   | 45379533  | 45379933  | Promoter (<=1kb)  | 15      | 45363631  | 45378547  | -986          | ENSG00000171766 | GATM         |
| NR4A2_Medium | chr15   | 45883073  | 45883473  | Promoter (3-4kb)  | 15      | 45879637  | 45928936  | 3436          | ENSG00000259200 | LOC105370802 |
| NR4A2_Medium | chr15   | 48322204  | 48322604  | Promoter (8-9kb)  | 15      | 48331011  | 48341495  | -8407         | ENSG00000128951 | DUT          |
| NR4A2_Medium | chr15   | 48815487  | 48815887  | Promoter (4-5kb)  | 15      | 48772515  | 48811146  | -4341         | ENSG00000103995 | CEP152       |
| NR4A2_Medium | chr15   | 49318721  | 49319121  | Promoter (<=1kb)  | 15      | 49319682  | 49328982  | -561          | ENSG00000156958 | GALK2        |
| NR4A2_Medium | chr15   | 49499229  | 49499629  | Promoter (8-9kb)  | 15      | 49489061  | 49508294  |               |                 |              |

| Condition    | peakChr | peakStart | peakEnd  | annotation        | geneChr | geneStart | geneEnd  | distanceToTSS | geneID          | geneSymbol   |
|--------------|---------|-----------|----------|-------------------|---------|-----------|----------|---------------|-----------------|--------------|
| NR4A2_Medium | chr15   | 55331685  | 55332085 | Promoter (8-9kb)  | 15      | 55340373  | 55350830 | -8288         | ENSG00000069943 | PIGB         |
| NR4A2_Medium | chr15   | 55491386  | 55491786 | Promoter (6-7kb)  | 15      | 55377024  | 55498341 | 6555          | ENSG00000261771 | DNAAF4-CCPG1 |
| NR4A2_Medium | chr15   | 55749103  | 55749503 | Promoter (5-6kb)  | 15      | 55611544  | 55743152 | -5951         | ENSG00000166450 | PRTG         |
| NR4A2_Medium | chr15   | 56466321  | 56466721 | Promoter (1-2kb)  | 15      | 56428724  | 56465137 | -1184         | ENSG00000138587 | MNS1         |
| NR4A2_Medium | chr15   | 57678691  | 57679091 | Promoter (1-2kb)  | 15      | 57680698  | 57714745 | -1607         | ENSG00000137878 | GCOM1        |
| NR4A2_Medium | chr15   | 57687088  | 57687488 | Promoter (6-7kb)  | 15      | 57680698  | 57714745 | 6390          | ENSG00000137878 | GCOM1        |
| NR4A2_Medium | chr15   | 57702337  | 57702737 | Promoter (3-4kb)  | 15      | 57706695  | 57714882 | -3958         | ENSG00000255529 | POLR2M       |
| NR4A2_Medium | chr15   | 58270850  | 58271250 | Promoter (8-9kb)  | 15      | 57955063  | 58279263 | 8013          | ENSG00000128918 | ALDH1A2      |
| NR4A2_Medium | chr15   | 59610223  | 59610623 | Promoter (1-2kb)  | 15      | 59611783  | 59622723 | -1160         | ENSG00000140297 | GCNT3        |
| NR4A2_Medium | chr15   | 60480897  | 60481297 | Promoter (1-2kb)  | 15      | 60479207  | 60630516 | 1690          | ENSG00000245534 | RORA-AS1     |
| NR4A2_Medium | chr15   | 61735964  | 61736364 | Promoter (6-7kb)  | 15      | 61729850  | 61731389 | 6114          | ENSG00000259284 | LINC02349    |
| NR4A2_Medium | chr15   | 62000153  | 62000553 | Promoter (8-9kb)  | 15      | 61983713  | 61991748 | -8405         | ENSG00000129003 | VPS13C       |
| NR4A2_Medium | chr15   | 63058049  | 63058449 | Promoter (1-2kb)  | 15      | 63057006  | 63066091 | 1043          | ENSG00000140416 | TPM1         |
| NR4A2_Medium | chr15   | 63331400  | 63331800 | Promoter (<=1kb)  | 15      | 63325980  | 63331813 | 13            | ENSG00000074410 | CA12         |
| NR4A2_Medium | chr15   | 63336593  | 63336993 | Promoter (4-5kb)  | 15      | 63325980  | 63331813 | -4780         | ENSG00000074410 | CA12         |
| NR4A2_Medium | chr15   | 64141751  | 64142151 | Promoter (5-6kb)  | 15      | 64136330  | 64143308 | 5421          | ENSG00000028528 | SNX1         |
| NR4A2_Medium | chr15   | 64323543  | 64323943 | Promoter (6-7kb)  | 15      | 64216591  | 64317007 | -6536         | ENSG00000169118 | CSNK1G1      |
| NR4A2_Medium | chr15   | 64904849  | 64905249 | Promoter (6-7kb)  | 15      | 64911902  | 64931967 | -6653         | ENSG00000166839 | ANKDD1A      |
| NR4A2_Medium | chr15   | 65065758  | 65066158 | Promoter (1-2kb)  | 15      | 65054228  | 65067943 | 1785          | ENSG00000103710 | RASL12       |
| NR4A2_Medium | chr15   | 65075043  | 65075443 | Promoter (1-2kb)  | 15      | 65054777  | 65076690 | 1247          | ENSG00000103710 | RASL12       |
| NR4A2_Medium | chr15   | 65164417  | 65164817 | Promoter (1-2kb)  | 15      | 65158191  | 65162647 | -1770         | ENSG00000166855 | CLPX         |
| NR4A2_Medium | chr15   | 65254295  | 65254695 | Promoter (6-7kb)  | 15      | 65234460  | 65261007 | 6312          | ENSG00000138617 | PARP16       |
| NR4A2_Medium | chr15   | 65309237  | 65309637 | Promoter (4-5kb)  | 15      | 65304677  | 65304792 | 4560          | ENSG00000200156 | RNU5B-1      |
| NR4A2_Medium | chr15   | 65380117  | 65380517 | Promoter (2-3kb)  | 15      | 65327127  | 65378002 | -2115         | ENSG00000174498 | IGDCC3       |
| NR4A2_Medium | chr15   | 65399199  | 65399599 | Promoter (2-3kb)  | 15      | 65381487  | 65396429 | -2770         | ENSG00000103742 | IGDCC4       |
| NR4A2_Medium | chr15   | 65799014  | 65799414 | Promoter (6-7kb)  | 15      | 65792447  | 65877819 | 6567          | ENSG00000103769 | RAB11A       |
| NR4A2_Medium | chr15   | 66382235  | 66382635 | Promoter (4-5kb)  | 15      | 66349302  | 66386712 | 4077          | ENSG00000075131 | TIPIN        |
| NR4A2_Medium | chr15   | 66994514  | 66994914 | Promoter (<=1kb)  | 15      | 66986368  | 66994187 | -327          | NA              | LOC102723493 |
| NR4A2_Medium | chr15   | 67191224  | 67191624 | Promoter (4-5kb)  | 15      | 67186662  | 67191521 | 4562          | ENSG00000166949 | SMAD3        |
| NR4A2_Medium | chr15   | 67429245  | 67429645 | Promoter (2-3kb)  | 15      | 67418886  | 67431837 | 2192          | ENSG00000259673 | IQCH-AS1     |
| NR4A2_Medium | chr15   | 67439592  | 67439992 | Promoter (7-8kb)  | 15      | 67418886  | 67431837 | -7755         | ENSG00000259673 | IQCH-AS1     |
| NR4A2_Medium | chr15   | 68607611  | 68608011 | Promoter (8-9kb)  | 15      | 68616540  | 68727803 | -8529         | ENSG00000103647 | CORO2B       |
| NR4A2_Medium | chr15   | 68934256  | 68934656 | Promoter (3-4kb)  | 15      | 68930634  | 69056725 | 3622          | ENSG00000255346 | NOX5         |
| NR4A2_Medium | chr15   | 69021986  | 69022386 | Promoter (7-8kb)  | 15      | 69014732  | 69057122 | 7254          | ENSG00000255346 | NOX5         |
| NR4A2_Medium | chr15   | 69421299  | 69421699 | Promoter (1-2kb)  | 15      | 69422900  | 69447918 | -1201         | ENSG00000137807 | KIF23        |
| NR4A2_Medium | chr15   | 69477580  | 69477980 | Promoter (9-10kb) | 15      | 69468036  | 69571083 | 9544          | ENSG00000245750 | DRAIC        |
| NR4A2_Medium | chr15   | 69598004  | 69598404 | Promoter (5-6kb)  | 15      | 69592213  | 69695730 | 5791          | ENSG00000245750 | PCAT29       |
| NR4A2_Medium | chr15   | 69678788  | 69679188 | Promoter (7-8kb)  | 15      | 69671748  | 69695750 | 7040          | ENSG00000245750 | PCAT29       |
| NR4A2_Medium | chr15   | 72105435  | 72105835 | Promoter (8-9kb)  | 15      | 72114258  | 72140962 | -8423         | ENSG00000166192 | SENP8        |
| NR4A2_Medium | chr15   | 72267995  | 72268395 | Promoter (<=1kb)  | 15      | 72241182  | 72267649 | -346          | ENSG00000137817 | PARP6        |
| NR4A2_Medium | chr15   | 72682165  | 72682565 | Promoter (3-4kb)  | 15      | 72686179  | 72738475 | -3614         | ENSG00000140463 | BBS4         |
| NR4A2_Medium | chr15   | 73300470  | 73300870 | Promoter (2-3kb)  | 15      | 73298299  | 73301550 | 2171          | ENSG00000067141 | NEO1         |
| NR4A2_Medium | chr15   | 73373613  | 73374013 | Promoter (4-5kb)  | 15      | 73319859  | 73368958 | -4655         | ENSG00000138622 | HCN4         |
| NR4A2_Medium | chr15   | 73571176  | 73571576 | Promoter (1-2kb)  | 15      | 73567012  | 73569294 | -1882         | ENSG00000281183 | NPTN-IT1     |
| NR4A2_Medium | chr15   | 73716387  | 73716787 | Promoter (5-6kb)  | 15      | 73711132  | 73714514 | 5255          | ENSG00000103855 | CD276        |
| NR4A2_Medium | chr15   | 73996920  | 73997320 | Promoter (<=1kb)  | 15      | 73998024  | 74028442 | -704          | ENSG00000140464 | PML          |
| NR4A2_Medium | chr15   | 74599758  | 74600158 | Promoter (8-9kb)  | 15      | 74608372  | 74630201 | -8214         | ENSG00000179335 | CLK3         |
| NR4A2_Medium | chr15   | 74837480  | 74837880 | Promoter (<=1kb)  | 15      | 74836805  | 74837956 | 76            | ENSG00000140474 | ULK3         |
| NR4A2_Medium | chr15   | 74952358  | 74952758 | Promoter (4-5kb)  | 15      | 74957219  | 75019277 | -4461         | ENSG00000198794 | SCAMP5       |
| NR4A2_Medium | chr15   | 75197507  | 75197907 | Promoter (<=1kb)  | 15      | 75198866  | 75206135 | -959          | ENSG00000167173 | C15orf39     |
| NR4A2_Medium | chr15   | 75623746  | 75624146 | Promoter (1-2kb)  | 15      | 75617520  | 75625179 | 1033          | ENSG00000169371 | SNUPN        |
| NR4A2_Medium | chr15   | 75877252  | 75877652 | Promoter (<=1kb)  | 15      | 75878186  | 75897062 | -534          | ENSG00000140367 | UBE2Q2       |
| NR4A2_Medium | chr15   | 77043720  | 77044120 | Promoter (8-9kb)  | 15      | 77035694  | 77037332 | 8026          | ENSG00000140368 | PSTPIP1      |
| NR4A2_Medium | chr15   | 77525362  | 77525762 | Promoter (<=1kb)  | 15      | 77525540  | 77534110 | 0             | ENSG00000259362 | LOC101929457 |
| NR4A2_Medium | chr15   | 77623691  | 77624091 | Promoter (8-9kb)  | 15      | 77613027  | 77632490 | 8399          | ENSG00000169783 | LINGO1       |
| NR4A2_Medium | chr15   | 77823343  | 77823743 | Promoter (2-3kb)  | 15      | 77615833  | 77820900 | -2443         | ENSG00000169783 | LINGO1       |
| NR4A2_Medium | chr15   | 77825666  | 77826066 | Promoter (4-5kb)  | 15      | 77615833  | 77820900 | -4766         | ENSG00000169783 | LINGO1       |
| NR4A2_Medium | chr15   | 78493312  | 78493712 | Promoter (<=1kb)  | 15      | 78494210  | 78497338 | -498          | ENSG00000136381 | IREB2        |
| NR4A2_Medium | chr15   | 78618318  | 78618718 | Promoter (<=1kb)  | 15      | 78618630  | 78619278 | 560           | ENSG00000080644 | CHRNA3       |
| NR4A2_Medium | chr15   | 78868487  | 78868887 | Promoter (3-4kb)  | 15      | 78872814  | 78898133 | -3927         | ENSG00000185778 | MORF4L1      |
| NR4A2_Medium | chr15   | 79091819  | 79092219 | Promoter (1-2kb)  | 15      | 78959947  | 79090773 | -1046         | ENSG00000058335 | RASGRF1      |
| NR4A2_Medium | chr15   | 79203625  | 79204025 | Promoter (5-6kb)  | 15      | 79209788  | 79209871 | -5763         | ENSG00000207695 | MIR184       |
| NR4A2_Medium | chr15   | 80331974  | 80332374 | Promoter (9-10kb) | 15      | 80320999  | 80341767 | 9393          | ENSG00000259361 | LINC00927    |
| NR4A2_Medium | chr15   | 80396626  | 80397026 | Promoter (7-8kb)  | 15      | 80404350  | 80475580 | -7324         | ENSG00000172379 | ARNT2        |
| NR4A2_Medium | chr15   | 80550505  | 80550905 | Promoter (<=1kb)  | 15      | 80551104  | 80574184 | -199          | ENSG00000172379 | ARNT2        |
| NR4A2_Medium | chr15   | 83208883  | 83209283 | Promoter (1-2kb)  | 15      | 83127753  | 83207823 | -1060         | ENSG00000166503 | HDGFL3       |
| NR4A2_Medium | chr15   | 84660246  | 84660646 | Promoter (1-2kb)  | 15      | 84655129  | 84658563 | -1683         | ENSG00000197696 | NMB          |
| NR4A2_Medium | chr15   | 85388320  | 85388720 | Promoter (7-8kb)  | 15      | 85380756  | 85521508 | 7564          | ENSG00000170776 | AKAP13       |
| NR4A2_Medium | chr15   | 85789269  | 85789669 | Promoter (5-6kb)  | 15      | 85760617  | 85794918 | 5249          | ENSG00000183655 | KLHL25       |
| NR4A2_Medium | chr15   | 85799352  | 85799752 | Promoter (4-5kb)  | 15      | 85759326  | 85794925 | -4427         | ENSG00000183655 | KLHL25       |
| NR4A2_Medium | chr15   | 85801498  | 85801898 | Promoter (6-7kb)  | 15      | 85759326  | 85794925 | -6573         | ENSG00000183655 | KLHL25       |
| NR4A2_Medium | chr15   | 85819284  | 85819684 | Promoter (5-6kb)  | 15      | 85825635  | 85825730 | -5951         | ENSG00000264406 | MIR548AP     |
| NR4A2_Medium | chr15   | 86143622  | 86144022 | Promoter (1-2kb)  | 15      | 86142011  | 86674452 | 1611          | ENSG00000273540 | AGBL1        |
| NR4A2_Medium | chr15   | 87949646  | 87950046 | Promoter (8-9kb)  | 15      | 87931082  | 87940735 | -8911         | ENSG00000140538 | NTRK3        |
| NR4A2_Medium | chr15   | 88137157  | 88137557 | Promoter (<=1kb)  | 15      | 88131969  | 88136478 | -679          | ENSG00000140538 | NTRK3        |
| NR4A2_Medium | chr15   | 88478589  | 88478989 | Promoter (1-2kb)  | 15      | 88476725  | 88478267 | 1864          | ENSG00000181991 | MRPS11       |
| NR4A2_Medium | chr15   | 89191442  | 89191842 | Promoter (6-7kb)  | 15      | 89185415  | 89193453 | 6027          | ENSG00000140526 | ABHD2        |
| NR4A2_Medium | chr15   | 89474943  | 89475343 | Promoter (4-5kb)  | 15      | 89471445  | 89479430 | 4087          | ENSG00000140519 | RHCG         |
| NR4A2_Medium | chr15   | 89746946  | 89747346 | Promoter (3-4kb)  | 15      | 89749891  | 89751137 | 3791          | ENSG00000166823 | MESP1        |
| NR4A2_Medium | chr15   | 89805203  | 89805603 | Promoter (<=1kb)  | 15      | 89804277  | 89805372 | 0             | ENSG00000166825 | ANPEP        |
| NR4A2_Medium | chr15   | 89819020  | 89819420 | Promoter (3-4kb)  | 15      | 89806273  | 89815401 | -3619         | ENSG00000166825 | ANPEP        |
| NR4A2_Medium | chr15   | 90165119  | 90165519 | Promoter (4-5kb)  | 15      | 90160604  | 90217786 | 4515          | ENSG00000185033 | SEMA4B       |
| NR4A2_Medium | chr15   | 90182700  | 90183100 | Promoter (1-2kb)  | 15      | 90184918  | 90219843 | -1818         | ENSG00000185033 | SEMA4B       |
| NR4A2_Medium | chr15   | 90195703  | 90196103 | Promoter (3-4kb)  | 15      | 90191928  | 90217810 | 3775          | ENSG00000185033 | SEMA4B       |
| NR4A2_Medium | chr15   | 90669942  | 90670342 | Promoter (9-10kb) | 15      | 90660739  | 90664686 | 9203          | ENSG00000245479 | LINC01585    |
| NR4A2_Medium | chr15   | 90808929  | 90809329 | Promoter (<=1kb)  | 15      | 90808771  | 90815629 | 158           | ENSG00000197299 | BLM          |
| NR4A2_Medium | chr15   | 91224118  | 91224518 | Promoter (1-2kb)  | 15      | 91225870  | 91301308 | -1352         | ENSG00000185518 | SV2B         |
| NR4A2_Medium | chr15   | 92116392  | 92116792 | Promoter (9-10kb) | 15      | 92126184  | 92171847 | -9392         | ENSG00000176463 | SLCO3A1      |
| NR4A2_Medium | chr15   | 92571766  | 92572166 | Promoter (<=1kb)  | 15      | 92567820  | 92571697 | -69           | NA              | LINC00930    |
| NR4A2_Medium | chr15   | 92907796  | 92908196 | Promoter (3-4kb)  | 15      | 92904473  | 92949231 | 3323          | ENSG00000173575 | CHD2         |
| NR4A2_Medium | chr15   | 93887696  | 93888096 | Promoter (6-7kb)  | 15      | 93894431  | 93973720 | -6335         | ENSG00000258785 | LINC01580    |
| NR4A2_Medium | chr15   | 97866521  | 97866921 | Promoter (7-8kb)  | 15      | 97838814  | 97874005 | 7084          | ENSG00000251209 | LINC00923    |
| NR4A2_Medium | chr15   | 97876562  | 97876962 | Promoter (<=1kb)  | 15      | 97873321  | 97875650 | -912          | ENSG00000251209 | LINC00923    |
| NR4A2_Medium | chr15   | 98002048  | 98002448 | Promoter (<=1kb)  | 15      | 98003038  | 98022009 | -590          | ENSG00000258483 |              |



| Condition    | peakChr | peakStart | peakEnd  | annotation        | geneChr | geneStart | geneEnd  | distanceToTSS | geneID           | geneSymbol   |
|--------------|---------|-----------|----------|-------------------|---------|-----------|----------|---------------|------------------|--------------|
| NR4A2_Medium | chr16   | 902508    | 902908   | Promoter (9–10kb) | 16      | 870874    | 893252   | -9256         | ENSG00000103227  | LMF1         |
| NR4A2_Medium | chr16   | 1213939   | 1214339  | Promoter (3–4kb)  | 16      | 1210608   | 1211448  | 3331          | ENSG00000196557  | CACNA1H      |
| NR4A2_Medium | chr16   | 1218384   | 1218997  | Promoter (5–6kb)  | 16      | 1222659   | 1224775  | 5778          | ENSG00000116176  | TPSG1        |
| NR4A2_Medium | chr16   | 1339675   | 1340075  | Promoter (3–4kb)  | 16      | 1343318   | 1345073  | -3243         | ENSG00000007516  | BAIAP3       |
| NR4A2_Medium | chr16   | 1611861   | 1612261  | Promoter (<=1kb)  | 16      | 1510427   | 1612072  | 0             | ENSG00000187535  | IFT140       |
| NR4A2_Medium | chr16   | 1698795   | 1699195  | Promoter (6–7kb)  | 16      | 1706183   | 1770317  | -6988         | ENSG00000138834  | MAPK8IP3     |
| NR4A2_Medium | chr16   | 1746922   | 1747322  | Promoter (<=1kb)  | 16      | 1747068   | 1748800  | 0             | ENSG00000138834  | MAPK8IP3     |
| NR4A2_Medium | chr16   | 1833247   | 1833647  | Promoter (6–7kb)  | 16      | 1827220   | 1838126  | 6027          | ENSG00000180185  | FAHD1        |
| NR4A2_Medium | chr16   | 1971285   | 1971685  | Promoter (<=1kb)  | 16      | 1972053   | 1982929  | -368          | ENSG00000183751  | TBL3         |
| NR4A2_Medium | chr16   | 2261359   | 2261759  | Promoter (2–3kb)  | 16      | 2253126   | 2264331  | 2572          | ENSG00000205937  | RNPS1        |
| NR4A2_Medium | chr16   | 3041968   | 3042368  | Promoter (4–5kb)  | 16      | 3046561   | 3060726  | -4193         | ENSG00000008516  | MMP25        |
| NR4A2_Medium | chr16   | 3261203   | 3261603  | Promoter (2–3kb)  | 16      | 3263743   | 3267567  | -2140         | ENSG00000281005  | LINC00921    |
| NR4A2_Medium | chr16   | 3551161   | 3551561  | Promoter (5–6kb)  | 16      | 3548135   | 3556994  | 5433          | ENSG00000167984  | NLRC3        |
| NR4A2_Medium | chr16   | 3870957   | 3871357  | Promoter (8–9kb)  | 16      | 3727539   | 3880120  | 8763          | ENSG00000005339  | CREBBP       |
| NR4A2_Medium | chr16   | 4698074   | 4698474  | Promoter (<=1kb)  | 16      | 4698143   | 4699195  | 721           | ENSG00000168096  | ANKS3        |
| NR4A2_Medium | chr16   | 4732745   | 4733145  | Promoter (<=1kb)  | 16      | 4714156   | 4734127  | 982           | ENSG00000168096  | ANKS3        |
| NR4A2_Medium | chr16   | 4939769   | 4940169  | Promoter (2–3kb)  | 16      | 4882507   | 4937148  | -2621         | ENSG00000118898  | PPL          |
| NR4A2_Medium | chr16   | 4952664   | 4953064  | Promoter (5–6kb)  | 16      | 4958330   | 5019157  | -5266         | ENSG00000103184  | SEC14L5      |
| NR4A2_Medium | chr16   | 4965986   | 4966386  | Promoter (5–6kb)  | 16      | 4883572   | 4960741  | -5245         | ENSG00000118898  | PPL          |
| NR4A2_Medium | chr16   | 5029512   | 5029912  | Promoter (<=1kb)  | 16      | 5024872   | 5030158  | 246           | ENSG00000103174  | NAGPA        |
| NR4A2_Medium | chr16   | 5038087   | 5038487  | Promoter (3–4kb)  | 16      | 5031843   | 5034141  | -3946         | ENSG00000103174  | NAGPA        |
| NR4A2_Medium | chr16   | 5248646   | 5249046  | Promoter (8–9kb)  | 16      | 5239802   | 7711458  | 8844          | ENSG00000078328  | RBFOX1       |
| NR4A2_Medium | chr16   | 5623731   | 5624131  | Promoter (7–8kb)  | 16      | 5609911   | 5616373  | -7358         | NA               | LINC01570    |
| NR4A2_Medium | chr16   | 6772771   | 6773171  | Promoter (<=1kb)  | 16      | 6773809   | 7710844  | -638          | ENSG00000078328  | RBFOX1       |
| NR4A2_Medium | chr16   | 7655232   | 7655632  | Promoter (1–2kb)  | 16      | 7653866   | 7710819  | 1366          | ENSG00000078328  | RBFOX1       |
| NR4A2_Medium | chr16   | 8580005   | 8580405  | Promoter (7–8kb)  | 16      | 8569706   | 8572302  | -7703         | ENSG00000232258  | TMEM114      |
| NR4A2_Medium | chr16   | 8749309   | 8749709  | Promoter (3–4kb)  | 16      | 8746002   | 8760429  | 3307          | ENSG00000183044  | ABAT         |
| NR4A2_Medium | chr16   | 8766293   | 8766693  | Promoter (<=1kb)  | 16      | 8765785   | 8768846  | 508           | ENSG00000183044  | ABAT         |
| NR4A2_Medium | chr16   | 10380077  | 10380477 | Promoter (5–6kb)  | 16      | 10386055  | 10430672 | -5578         | ENSG00000166669  | ATF7IP2      |
| NR4A2_Medium | chr16   | 10432513  | 10432913 | Promoter (1–2kb)  | 16      | 10430595  | 10483637 | 1918          | ENSG00000166669  | ATF7IP2      |
| NR4A2_Medium | chr16   | 10763586  | 10763986 | Promoter (1–2kb)  | 16      | 10765024  | 10769313 | -1038         | ENSG00000103274  | NUBP1        |
| NR4A2_Medium | chr16   | 11384157  | 11384557 | Promoter (<=1kb)  | 16      | 11359845  | 11383705 | -452          | ENSG00000188897  | LOC400499    |
| NR4A2_Medium | chr16   | 11819287  | 11819687 | Promoter (9–10kb) | 16      | 11819850  | 11828811 | 9124          | ENSG00000262117  | BCAR4        |
| NR4A2_Medium | chr16   | 12728523  | 12728923 | Promoter (8–9kb)  | 16      | 12720321  | 12720371 | 8202          | ENSG00000264733  | MIR4718      |
| NR4A2_Medium | chr16   | 18921021  | 18921421 | Promoter (4–5kb)  | 16      | 18890889  | 18925750 | 4329          | ENSG00000157106  | SMG1         |
| NR4A2_Medium | chr16   | 18986102  | 18986502 | Promoter (1–2kb)  | 16      | 18984287  | 19063942 | 1815          | ENSG00000170537  | TMC7         |
| NR4A2_Medium | chr16   | 19064554  | 19064954 | Promoter (2–3kb)  | 16      | 19062754  | 19067424 | 2470          | ENSG00000261465  | LOC102723385 |
| NR4A2_Medium | chr16   | 19311448  | 19311848 | Promoter (6–7kb)  | 16      | 19304881  | 19310947 | 6567          | ENSG00000261210  | CLEC19A      |
| NR4A2_Medium | chr16   | 19413400  | 19413800 | Promoter (2–3kb)  | 16      | 19410735  | 19499113 | 2665          | ENSG00000103534  | TMC5         |
| NR4A2_Medium | chr16   | 19888038  | 19888438 | Promoter (1–2kb)  | 16      | 19858971  | 19886167 | -1871         | ENSG00000167191  | GPRC5B       |
| NR4A2_Medium | chr16   | 20070935  | 20071335 | Promoter (2–3kb)  | 16      | 20031659  | 20073767 | 2432          | ENSG00000180269  | GPR139       |
| NR4A2_Medium | chr16   | 20360346  | 20360746 | Promoter (4–5kb)  | 16      | 20333069  | 20356301 | -4045         | ENSG00000169344  | UMOD         |
| NR4A2_Medium | chr16   | 20614622  | 20615022 | Promoter (4–5kb)  | 16      | 20610243  | 20775920 | 4379          | ENSG00000005187  | ACSM3        |
| NR4A2_Medium | chr16   | 20740834  | 20741234 | Promoter (<=1kb)  | 16      | 20737089  | 20741803 | 569           | ENSG00000066654  | THUMPD1      |
| NR4A2_Medium | chr16   | 21658698  | 21659098 | Promoter (4–5kb)  | 16      | 21663971  | 21760729 | -4873         | ENSG00000155719  | OTOA         |
| NR4A2_Medium | chr16   | 23150368  | 23150768 | Promoter (1–2kb)  | 16      | 23061406  | 23149270 | -1098         | ENSG00000103404  | USP31        |
| NR4A2_Medium | chr16   | 23181580  | 23181980 | Promoter (<=1kb)  | 16      | 23182745  | 23216883 | -765          | ENSG00000166828  | SCNN1G       |
| NR4A2_Medium | chr16   | 23274698  | 23275098 | Promoter (3–4kb)  | 16      | 23278231  | 23352913 | -3133         | ENSG00000168447  | SCNN1B       |
| NR4A2_Medium | chr16   | 23356858  | 23357258 | Promoter (1–2kb)  | 16      | 23355417  | 23372183 | 1441          | ENSG00000168447  | SCNN1B       |
| NR4A2_Medium | chr16   | 23400409  | 23400809 | Promoter (6–7kb)  | 16      | 23388641  | 23393581 | -6828         | ENSG00000168434  | COG7         |
| NR4A2_Medium | chr16   | 23652543  | 23652943 | Promoter (9–10kb) | 16      | 23642587  | 23665701 | 9956          | ENSG00000166847  | DCTN5        |
| NR4A2_Medium | chr16   | 23697597  | 23697997 | Promoter (2–3kb)  | 16      | 23690638  | 23694760 | -2837         | ENSG00000134398  | ERN2         |
| NR4A2_Medium | chr16   | 25880013  | 25880413 | Promoter (6–7kb)  | 16      | 25886746  | 26136207 | -6333         | ENSG00000182601  | HS3ST4       |
| NR4A2_Medium | chr16   | 25894962  | 25895362 | Promoter (8–9kb)  | 16      | 25886746  | 26136207 | 8216          | ENSG00000182601  | HS3ST4       |
| NR4A2_Medium | chr16   | 27249967  | 27250367 | Promoter (7–8kb)  | 16      | 27233070  | 27258151 | 7784          | ENSG00000169189  | NSMCE1       |
| NR4A2_Medium | chr16   | 27252374  | 27252774 | Promoter (5–6kb)  | 16      | 27233070  | 27258151 | 5377          | ENSG00000169189  | NSMCE1       |
| NR4A2_Medium | chr16   | 27286257  | 27286657 | Promoter (<=1kb)  | 16      | 27286657  | 27290492 | 0             | ENSG00000245888  | NSMCE1-DT    |
| NR4A2_Medium | chr16   | 27335523  | 27335923 | Promoter (4–5kb)  | 16      | 27340204  | 27341200 | -4281         | ENSG00000077238  | IL4R         |
| NR4A2_Medium | chr16   | 27462097  | 27462497 | Promoter (3–4kb)  | 16      | 27461296  | 27466327 | 3830          | ENSG00000077235  | GTF3C1       |
| NR4A2_Medium | chr16   | 27625795  | 27626195 | Promoter (2–3kb)  | 16      | 27628588  | 27654698 | -2393         | ENSG00000047578  | KATNIP       |
| NR4A2_Medium | chr16   | 28294280  | 28294680 | Promoter (1–2kb)  | 16      | 28292525  | 28323849 | 1755          | ENSG00000188322  | SBK1         |
| NR4A2_Medium | chr16   | 28949821  | 28950221 | Promoter (<=1kb)  | 16      | 28950807  | 28965698 | -586          | ENSG00000176953  | NFATC2IP     |
| NR4A2_Medium | chr16   | 29308854  | 29309254 | Promoter (3–4kb)  | 16      | 29312350  | 29331277 | -3096         | NA               | SNX29P2      |
| NR4A2_Medium | chr16   | 29755427  | 29755827 | Promoter (9–10kb) | 16      | 29742463  | 29745990 | -9437         | ENSG00000185905  | C16orf54     |
| NR4A2_Medium | chr16   | 29938381  | 29938781 | Promoter (2–3kb)  | 16      | 29940885  | 29973050 | -2104         | ENSG00000149932  | TMEM219      |
| NR4A2_Medium | chr16   | 30414645  | 30415045 | Promoter (4–5kb)  | 16      | 30419625  | 30419759 | 4714          | ENSG00000199787  | SNORA80C     |
| NR4A2_Medium | chr16   | 30420762  | 30421162 | Promoter (1–2kb)  | 16      | 30419625  | 30419759 | -1003         | ENSG00000199787  | SNORA80C     |
| NR4A2_Medium | chr16   | 30472516  | 30472916 | Promoter (<=1kb)  | 16      | 30472719  | 30474607 | 0             | ENSG00000005844  | ITGAL        |
| NR4A2_Medium | chr16   | 30506764  | 30507164 | Promoter (1–2kb)  | 16      | 30504872  | 30506772 | 1892          | ENSG00000005844  | ITGAL        |
| NR4A2_Medium | chr16   | 30567416  | 30567816 | Promoter (3–4kb)  | 16      | 30570220  | 30571320 | 3504          | ENSG00000229809  | ZNF688       |
| NR4A2_Medium | chr16   | 30580853  | 30581253 | Promoter (4–5kb)  | 16      | 30583129  | 30585497 | 4244          | ENSG00000197162  | ZNF785       |
| NR4A2_Medium | chr16   | 30610205  | 30610605 | Promoter (<=1kb)  | 16      | 30602558  | 30610389 | 0             | ENSG00000156853  | ZNF689       |
| NR4A2_Medium | chr16   | 30689438  | 30689838 | Promoter (8–9kb)  | 16      | 30698209  | 30704309 | -8371         | ENSG00000080603  | SRCAP        |
| NR4A2_Medium | chr16   | 30785331  | 30785731 | Promoter (1–2kb)  | 16      | 30778456  | 30787205 | 1474          | ENSG00000102870  | ZNF629       |
| NR4A2_Medium | chr16   | 30998960  | 30999360 | Promoter (1–2kb)  | 16      | 30996199  | 30997044 | -1916         | ENSG00000099365  | STX1B        |
| NR4A2_Medium | chr16   | 31131094  | 31131494 | Promoter (<=1kb)  | 16      | 31130456  | 31131359 | 638           | ENSG00000103510  | KAT8         |
| NR4A2_Medium | chr16   | 31133270  | 31133670 | Promoter (1–2kb)  | 16      | 31132439  | 31135640 | 1970          | ENSG000000052344 | PRSS8        |
| NR4A2_Medium | chr16   | 31205339  | 31205739 | Promoter (1–2kb)  | 16      | 31202194  | 31203450 | -1889         | ENSG00000103490  | PYCARD       |
| NR4A2_Medium | chr16   | 31268664  | 31269064 | Promoter (2–3kb)  | 16      | 31271885  | 31273684 | -2821         | ENSG00000169896  | ITGAM        |
| NR4A2_Medium | chr16   | 31328412  | 31329045 | Promoter (<=1kb)  | 16      | 31329002  | 31330052 | 0             | ENSG00000169896  | ITGAM        |
| NR4A2_Medium | chr16   | 31428421  | 31428821 | Promoter (<=1kb)  | 16      | 31427731  | 31428360 | -61           | ENSG00000156885  | COX6A2       |
| NR4A2_Medium | chr16   | 31693692  | 31694092 | Promoter (6–7kb)  | 16      | 31700590  | 31707437 | -6498         | ENSG00000131797  | CLUHP3       |
| NR4A2_Medium | chr16   | 33337958  | 33338400 | Promoter (7–8kb)  | 16      | 33206431  | 33330342 | -7616         | NA               | LOC105369266 |
| NR4A2_Medium | chr16   | 35742189  | 35742589 | Promoter (<=1kb)  | 16      | 35743268  | 35755626 | -679          | ENSG00000261122  | LINC02167    |
| NR4A2_Medium | chr16   | 46770311  | 46770711 | Promoter (7–8kb)  | 16      | 46707666  | 46763246 | -7065         | ENSG00000140795  | MYLK3        |
| NR4A2_Medium | chr16   | 46915300  | 46915781 | Promoter (<=1kb)  | 16      | 46915298  | 46929007 | 2             | ENSG00000166123  | GPT2         |
| NR4A2_Medium | chr16   | 46918456  | 46918856 | Promoter (3–4kb)  | 16      | 46915298  | 46929007 | 3158          | ENSG00000166123  | GPT2         |
| NR4A2_Medium | chr16   | 47593155  | 47593555 | Promoter (<=1kb)  | 16      | 47594150  | 47598036 | -595          | ENSG00000102893  | PHKB         |
| NR4A2_Medium | chr16   | 47854369  | 47854911 | Promoter (3–4kb)  | 16      | 47858579  | 47908431 | -3668         | ENSG00000261231  | LINC02133    |
| NR4A2_Medium | chr16   | 48114292  | 48114692 | Promoter (<=1kb)  | 16      | 48111448  | 48115433 | 741           | ENSG00000140798  | ABCC12       |
| NR4A2_Medium | chr16   | 48180069  | 48180469 | Promoter (6–7kb)  | 16      | 48166910  | 48187390 | 6921          | ENSG00000121270  | ABCC11       |
| NR4A2_Medium | chr16   | 48219427  | 48219827 | Promoter (3–4kb)  | 16      | 48215232  | 48223707 | 3880          | ENSG00000121270  | ABCC11       |
| NR4A2_Medium | chr16   | 49373913  | 49374313 | Promoter (<=1kb)  | 16      | 49373804  | 49399431 | 109           | ENSG00000166152  | C16orf78     |
| NR4A2_Medium | chr16   | 49380998  | 49381398 | Promoter (7–8kb)  | 16      | 49373804  | 49399431 | 7194          | ENSG00000166152  | C16orf78     |
| NR4A2_Medium | chr16   | 49640190  | 49640590 | Promoter (<=1kb)  | 16      | 49490951  | 49640852 | 262           | ENSG00000102935  |              |

| Condition    | peakChr | peakStart | peakEnd  | annotation        | geneChr | geneStart | geneEnd  | distanceToTSS | geneID          | geneSymbol   |
|--------------|---------|-----------|----------|-------------------|---------|-----------|----------|---------------|-----------------|--------------|
| NR4A2_Medium | chr16   | 57014750  | 57015150 | Promoter (1-2kb)  | 16      | 57017074  | 57083524 | -1924         | ENSG00000140853 | NLRC5        |
| NR4A2_Medium | chr16   | 57070535  | 57070935 | Promoter (<=1kb)  | 16      | 57069877  | 57077369 | 658           | ENSG00000140853 | NLRC5        |
| NR4A2_Medium | chr16   | 57579641  | 57580041 | Promoter (4-5kb)  | 16      | 57574816  | 57591681 | 4825          | ENSG00000159618 | ADGRG5       |
| NR4A2_Medium | chr16   | 57705903  | 57706343 | Promoter (<=1kb)  | 16      | 57704907  | 57707861 | 996           | ENSG00000159625 | DRC7         |
| NR4A2_Medium | chr16   | 57728991  | 57729391 | Promoter (3-4kb)  | 16      | 57725474  | 57731453 | 3517          | ENSG00000159625 | DRC7         |
| NR4A2_Medium | chr16   | 57758433  | 57758833 | Promoter (2-3kb)  | 16      | 57758320  | 57760945 | 2112          | ENSG00000140859 | KIFC3        |
| NR4A2_Medium | chr16   | 57762724  | 57763124 | Promoter (1-2kb)  | 16      | 57759753  | 57764389 | 1265          | ENSG00000140859 | KIFC3        |
| NR4A2_Medium | chr16   | 57915601  | 57916001 | Promoter (3-4kb)  | 16      | 57897856  | 57911901 | -3700         | ENSG00000070729 | CNGB1        |
| NR4A2_Medium | chr16   | 58028544  | 58028944 | Promoter (2-3kb)  | 16      | 58025754  | 58046901 | 2790          | ENSG00000102996 | MMP15        |
| NR4A2_Medium | chr16   | 58031511  | 58031911 | Promoter (5-6kb)  | 16      | 58025754  | 58046901 | 5757          | ENSG00000102996 | MMP15        |
| NR4A2_Medium | chr16   | 58503996  | 58504396 | Promoter (<=1kb)  | 16      | 58503833  | 58507819 | 163           | ENSG00000103034 | NDRG4        |
| NR4A2_Medium | chr16   | 65068034  | 65068434 | Promoter (3-4kb)  | 16      | 65004766  | 65072213 | 3779          | ENSG00000140937 | CDH11        |
| NR4A2_Medium | chr16   | 66466876  | 66467276 | Promoter (2-3kb)  | 16      | 66469714  | 66485503 | -2438         | ENSG00000166546 | BEAN1        |
| NR4A2_Medium | chr16   | 66474390  | 66474790 | Promoter (1-2kb)  | 16      | 66469796  | 66475867 | 1077          | ENSG00000261656 | BEAN1-AS1    |
| NR4A2_Medium | chr16   | 66495035  | 66495435 | Promoter (9-10kb) | 16      | 66485804  | 66493214 | 9231          | ENSG00000166546 | BEAN1        |
| NR4A2_Medium | chr16   | 66592130  | 66592530 | Promoter (5-6kb)  | 16      | 66586909  | 66588275 | 5221          | ENSG00000140932 | CMTM2        |
| NR4A2_Medium | chr16   | 66882441  | 66882841 | Promoter (1-2kb)  | 16      | 66880607  | 66885011 | 1834          | ENSG00000172840 | PDP2         |
| NR4A2_Medium | chr16   | 67288054  | 67288454 | Promoter (<=1kb)  | 16      | 67287950  | 67289072 | 104           | ENSG00000196155 | PLEKHG4      |
| NR4A2_Medium | chr16   | 67332150  | 67332550 | Promoter (5-6kb)  | 16      | 67326980  | 67347591 | 5170          | ENSG00000159708 | LRRC36       |
| NR4A2_Medium | chr16   | 67626947  | 67627347 | Promoter (<=1kb)  | 16      | 67626509  | 67639130 | 438           | ENSG00000102974 | CTCF         |
| NR4A2_Medium | chr16   | 67627739  | 67628139 | Promoter (1-2kb)  | 16      | 67626509  | 67639130 | 1230          | ENSG00000102974 | CTCF         |
| NR4A2_Medium | chr16   | 68023362  | 68023762 | Promoter (<=1kb)  | 16      | 68021274  | 68023442 | 0             | ENSG00000182810 | DDX28        |
| NR4A2_Medium | chr16   | 68284792  | 68285192 | Promoter (2-3kb)  | 16      | 68287760  | 68294907 | -2568         | ENSG00000103064 | SLC7A6       |
| NR4A2_Medium | chr16   | 69327503  | 69327903 | Promoter (2-3kb)  | 16      | 69326913  | 69330588 | 2685          | ENSG00000258429 | PDF          |
| NR4A2_Medium | chr16   | 70132671  | 70133071 | Promoter (<=1kb)  | 16      | 70131933  | 70156859 | 738           | ENSG00000090857 | PDPR         |
| NR4A2_Medium | chr16   | 70133520  | 70133920 | Promoter (1-2kb)  | 16      | 70131933  | 70156859 | 1587          | ENSG00000090857 | PDPR         |
| NR4A2_Medium | chr16   | 70257929  | 70258329 | Promoter (<=1kb)  | 16      | 70253456  | 70258215 | 0             | ENSG00000090861 | AARS1        |
| NR4A2_Medium | chr16   | 70269156  | 70269556 | Promoter (1-2kb)  | 16      | 70259036  | 70267796 | -1360         | ENSG00000090861 | AARS1        |
| NR4A2_Medium | chr16   | 70303506  | 70303906 | Promoter (4-5kb)  | 16      | 70299334  | 70317942 | 4172          | ENSG00000157349 | DDX19B       |
| NR4A2_Medium | chr16   | 70357335  | 70357735 | Promoter (<=1kb)  | 16      | 70356861  | 70372329 | 474           | ENSG00000168872 | DDX19A       |
| NR4A2_Medium | chr16   | 70412720  | 70413120 | Promoter (9-10kb) | 16      | 70399083  | 70423073 | 9953          | ENSG00000157350 | ST3GAL2      |
| NR4A2_Medium | chr16   | 70447504  | 70447904 | Promoter (6-7kb)  | 16      | 70454595  | 70466206 | -6691         | ENSG00000157353 | FCSK         |
| NR4A2_Medium | chr16   | 70482944  | 70483344 | Promoter (<=1kb)  | 16      | 70480867  | 70482794 | -150          | ENSG00000103051 | COG4         |
| NR4A2_Medium | chr16   | 70644891  | 70645291 | Promoter (1-2kb)  | 16      | 70646563  | 70656671 | -1272         | ENSG00000157368 | IL34         |
| NR4A2_Medium | chr16   | 71513471  | 71513871 | Promoter (<=1kb)  | 16      | 71513863  | 71517849 | 0             | ENSG00000260520 | LOC105371335 |
| NR4A2_Medium | chr16   | 71573979  | 71574379 | Promoter (2-3kb)  | 16      | 71565660  | 71577092 | 2713          | ENSG00000198650 | TAT          |
| NR4A2_Medium | chr16   | 71699511  | 71699911 | Promoter (<=1kb)  | 16      | 71698567  | 71698701 | -810          | ENSG00000263666 | SNORA70D     |
| NR4A2_Medium | chr16   | 71811725  | 71812125 | Promoter (2-3kb)  | 16      | 71732385  | 71809201 | -2524         | ENSG00000166747 | AP1G1        |
| NR4A2_Medium | chr16   | 71891885  | 71892285 | Promoter (1-2kb)  | 16      | 71890569  | 71927890 | 1316          | ENSG00000182149 | IST1         |
| NR4A2_Medium | chr16   | 74697911  | 74698311 | Promoter (2-3kb)  | 16      | 74671855  | 74700790 | 2479          | ENSG00000168404 | MLKL         |
| NR4A2_Medium | chr16   | 74765822  | 74766222 | Promoter (8-9kb)  | 16      | 74712969  | 74774820 | 8598          | ENSG00000103089 | FA2H         |
| NR4A2_Medium | chr16   | 75313516  | 75313916 | Promoter (6-7kb)  | 16      | 75293698  | 75306545 | -6971         | ENSG00000153774 | CFDP1        |
| NR4A2_Medium | chr16   | 77712775  | 77713175 | Promoter (9-10kb) | 16      | 77722492  | 77742260 | -9317         | ENSG00000140876 | NUDT7        |
| NR4A2_Medium | chr16   | 78414684  | 78415084 | Promoter (9-10kb) | 16      | 78424871  | 78432752 | -9787         | ENSG00000186153 | VWOX         |
| NR4A2_Medium | chr16   | 80575989  | 80576389 | Promoter (3-4kb)  | 16      | 80567103  | 80572808 | -3181         | ENSG00000260737 | LINC01227    |
| NR4A2_Medium | chr16   | 80864057  | 80864457 | Promoter (6-7kb)  | 16      | 80830494  | 80870520 | 6063          | ENSG00000260896 | ARLNC1       |
| NR4A2_Medium | chr16   | 81116353  | 81116753 | Promoter (2-3kb)  | 16      | 81110875  | 81113981 | -2372         | ENSG00000166473 | PKD1L2       |
| NR4A2_Medium | chr16   | 81614975  | 81615375 | Promoter (3-4kb)  | 16      | 81611348  | 81611408 | 3627          | ENSG00000275109 | MIR6504      |
| NR4A2_Medium | chr16   | 81744599  | 81744999 | Promoter (5-6kb)  | 16      | 81739097  | 81859163 | 5502          | ENSG00000197943 | PLCG2        |
| NR4A2_Medium | chr16   | 83507818  | 83508218 | Promoter (<=1kb)  | 16      | 83508346  | 83508408 | -128          | ENSG00000263785 | MIR3182      |
| NR4A2_Medium | chr16   | 84186033  | 84186433 | Promoter (<=1kb)  | 16      | 84177877  | 84186981 | 548           | ENSG00000103168 | TAF1C        |
| NR4A2_Medium | chr16   | 84365184  | 84365584 | Promoter (2-3kb)  | 16      | 84368527  | 84464178 | -2943         | ENSG00000064270 | ATP2C2       |
| NR4A2_Medium | chr16   | 84376108  | 84376508 | Promoter (7-8kb)  | 16      | 84368527  | 84464187 | 7581          | ENSG00000064270 | ATP2C2       |
| NR4A2_Medium | chr16   | 84397471  | 84397871 | Promoter (6-7kb)  | 16      | 84404427  | 84464000 | -6556         | ENSG00000064270 | ATP2C2       |
| NR4A2_Medium | chr16   | 85651877  | 85652277 | Promoter (2-3kb)  | 16      | 85654432  | 85676204 | -2155         | ENSG00000131149 | GSE1         |
| NR4A2_Medium | chr16   | 85716376  | 85716776 | Promoter (5-6kb)  | 16      | 85707517  | 85710850 | -5526         | ENSG00000154102 | C16orf74     |
| NR4A2_Medium | chr16   | 86295130  | 86295530 | Promoter (5-6kb)  | 16      | 86225580  | 86301303 | 5773          | NA              | LINC01081    |
| NR4A2_Medium | chr16   | 86557698  | 86558098 | Promoter (2-3kb)  | 16      | 86555320  | 86557299 | 2378          | ENSG00000280278 | FLJ30679     |
| NR4A2_Medium | chr16   | 87052551  | 87052951 | Promoter (4-5kb)  | 16      | 87057784  | 87063991 | -4833         | ENSG00000232190 | LINC02181    |
| NR4A2_Medium | chr16   | 87210137  | 87210537 | Promoter (1-2kb)  | 16      | 87212122  | 87226430 | -1585         | ENSG00000261095 | LOC101928708 |
| NR4A2_Medium | chr16   | 87343826  | 87344226 | Promoter (9-10kb) | 16      | 87302876  | 87334273 | -9553         | ENSG00000260456 | C16orf95     |
| NR4A2_Medium | chr16   | 87438642  | 87439042 | Promoter (5-6kb)  | 16      | 87411412  | 87433134 | -5508         | ENSG00000140948 | ZCCHC14      |
| NR4A2_Medium | chr16   | 87502228  | 87502628 | Promoter (8-9kb)  | 16      | 87494187  | 87515635 | 8041          | ENSG00000288568 | LOC101928737 |
| NR4A2_Medium | chr16   | 87700473  | 87700873 | Promoter (7-8kb)  | 16      | 87703026  | 87708387 | 7514          | ENSG00000104731 | KLHDC4       |
| NR4A2_Medium | chr16   | 87718676  | 87719076 | Promoter (7-8kb)  | 16      | 87707816  | 87710877 | -7799         | ENSG00000104731 | KLHDC4       |
| NR4A2_Medium | chr16   | 87938165  | 87938565 | Promoter (1-2kb)  | 16      | 87881549  | 87936580 | -1585         | ENSG00000174990 | CA5A         |
| NR4A2_Medium | chr16   | 88015232  | 88015632 | Promoter (1-2kb)  | 16      | 88017190  | 88033219 | -1558         | ENSG00000172530 | BANP         |
| NR4A2_Medium | chr16   | 88037904  | 88038304 | Promoter (<=1kb)  | 16      | 88037273  | 88072130 | 631           | ENSG00000172530 | BANP         |
| NR4A2_Medium | chr16   | 88103618  | 88104018 | Promoter (2-3kb)  | 16      | 88099409  | 88100985 | -2633         | ENSG00000205037 | LOC400553    |
| NR4A2_Medium | chr16   | 88192859  | 88193259 | Promoter (1-2kb)  | 16      | 88194281  | 88195217 | -1022         | ENSG00000260420 | LINC02182    |
| NR4A2_Medium | chr16   | 88460680  | 88461080 | Promoter (7-8kb)  | 16      | 88453627  | 88516646 | 7053          | ENSG00000179588 | ZFPM1        |
| NR4A2_Medium | chr16   | 88521436  | 88521836 | Promoter (9-10kb) | 16      | 88512960  | 88531053 | 9217          | ENSG00000261744 | LOC100128882 |
| NR4A2_Medium | chr16   | 88726282  | 88726682 | Promoter (<=1kb)  | 16      | 88722982  | 88726344 | 0             | ENSG00000103335 | PIEZO1       |
| NR4A2_Medium | chr16   | 88824114  | 88824514 | Promoter (2-3kb)  | 16      | 88824789  | 88827116 | 2602          | ENSG00000141012 | GALNS        |
| NR4A2_Medium | chr16   | 88889028  | 88889428 | Promoter (5-6kb)  | 16      | 88883272  | 88887136 | 5756          | ENSG00000259881 | LOC101927793 |
| NR4A2_Medium | chr16   | 89132480  | 89132880 | Promoter (3-4kb)  | 16      | 89136548  | 89155846 | -3668         | ENSG00000176715 | ACSF3        |
| NR4A2_Medium | chr16   | 89293598  | 89293998 | Promoter (2-3kb)  | 16      | 89296128  | 89298316 | -2130         | ENSG00000260279 | LOC105371414 |
| NR4A2_Medium | chr16   | 89313904  | 89314304 | Promoter (<=1kb)  | 16      | 89300645  | 89313585 | -319          | ENSG00000167522 | ANKRD11      |
| NR4A2_Medium | chr16   | 89316442  | 89316842 | Promoter (<=1kb)  | 16      | 89300120  | 89316998 | 156           | ENSG00000167522 | ANKRD11      |
| NR4A2_Medium | chr16   | 89325469  | 89325869 | Promoter (2-3kb)  | 16      | 89323224  | 89324923 | 2245          | ENSG00000261253 | LOC100287036 |
| NR4A2_Medium | chr16   | 89482985  | 89483385 | Promoter (5-6kb)  | 16      | 89291728  | 89489193 | 5808          | ENSG00000167522 | ANKRD11      |
| NR4A2_Medium | chr16   | 89651622  | 89652022 | Promoter (2-3kb)  | 16      | 89645836  | 89649593 | -2029         | ENSG00000131165 | CHMP1A       |
| NR4A2_Medium | chr16   | 89763889  | 89764289 | Promoter (<=1kb)  | 16      | 89748764  | 89764947 | 658           | ENSG00000187741 | FANCA        |
| NR4A2_Medium | chr16   | 89784208  | 89784608 | Promoter (4-5kb)  | 16      | 89773320  | 89779957 | -4251         | ENSG00000187741 | FANCA        |
| NR4A2_Medium | chr16   | 89906547  | 89906947 | Promoter (<=1kb)  | 16      | 89906157  | 89918233 | 390           | ENSG00000141002 | TCF25        |
| NR4A2_Medium | chr16   | 89907836  | 89908236 | Promoter (<=1kb)  | 16      | 89908966  | 89911379 | -730          | ENSG00000141002 | TCF25        |
| NR4A2_Medium | chr16   | 90032465  | 90032865 | Promoter (2-3kb)  | 16      | 90028908  | 90029901 | -2564         | ENSG00000221819 | GAS8-AS1     |
| NR4A2_Medium | chr17   | 866498    | 866898   | Promoter (2-3kb)  | 17      | 799313    | 864111   | -2387         | ENSG00000167693 | NXN          |
| NR4A2_Medium | chr17   | 1283846   | 1284246  | Promoter (4-5kb)  | 17      | 1279662   | 1300978  | 4184          | ENSG00000184811 | TRARG1       |
| NR4A2_Medium | chr17   | 1849502   | 1849902  | Promoter (5-6kb)  | 17      | 1843920   | 1854274  | 5582          | ENSG00000132383 | RPA1         |
| NR4A2_Medium | chr17   | 2043612   | 2044012  | Promoter (1-2kb)  | 17      | 2042022   | 2043425  | 1590          | ENSG00000262664 | OVCA2        |
| NR4A2_Medium | chr17   | 2231132   | 2231532  | Promoter (1-2kb)  | 17      | 2232680   | 2233610  | -1148         | ENSG00000225084 | LOC101927839 |
| NR4A2_Medium | chr17   | 2323711   | 2324111  | Promoter (5-6kb)  | 17      | 2329119   | 2329213  | 5102          | NA              | SNORD91B     |
| NR4A2_Medium | chr17   | 2677141   | 2677541  | Promoter (2-3kb)  | 17      | 2679687   | 2681744  | -2146         | ENSG00000       |              |



| Condition    | peakChr | peakStart | peakEnd  | annotation        | geneChr | geneStart | geneEnd  | distanceToTSS | geneID          | geneSymbol         |
|--------------|---------|-----------|----------|-------------------|---------|-----------|----------|---------------|-----------------|--------------------|
| NR4A2_Medium | chr17   | 5337979   | 5338379  | Promoter (5-6kb)  | 17      | 5332055   | 5336689  | 5924          | ENSG00000029725 | RABEP1             |
| NR4A2_Medium | chr17   | 5384082   | 5384482  | Promoter (2-3kb)  | 17      | 5386104   | 5387132  | 2650          | ENSG00000108559 | NUP88              |
| NR4A2_Medium | chr17   | 6560511   | 6560911  | Promoter (3-4kb)  | 17      | 6451263   | 6556555  | -3956         | ENSG00000091622 | PITPNM3            |
| NR4A2_Medium | chr17   | 6564310   | 6564710  | Promoter (7-8kb)  | 17      | 6451263   | 6556555  | -7755         | ENSG00000091622 | PITPNM3            |
| NR4A2_Medium | chr17   | 6839985   | 6840385  | Promoter (8-9kb)  | 17      | 6799661   | 6831761  | -8224         | ENSG00000167858 | TEKT1              |
| NR4A2_Medium | chr17   | 7195408   | 7195808  | Promoter (1-2kb)  | 17      | 7190798   | 7196809  | 1001          | ENSG00000132535 | DLG4               |
| NR4A2_Medium | chr17   | 7234474   | 7234874  | Promoter (<=1kb)  | 17      | 7225342   | 7234517  | 0             | ENSG0000004975  | DVL2               |
| NR4A2_Medium | chr17   | 7552703   | 7553103  | Promoter (2-3kb)  | 17      | 7549778   | 7557574  | 2925          | ENSG00000239697 | TNFSF12            |
| NR4A2_Medium | chr17   | 7845065   | 7845465  | Promoter (<=1kb)  | 17      | 7844915   | 7847571  | 150           | ENSG00000132510 | KDM6B              |
| NR4A2_Medium | chr17   | 7925150   | 7925550  | Promoter (<=1kb)  | 17      | 7923456   | 7925975  | 425           | ENSG00000170049 | KCNAB3             |
| NR4A2_Medium | chr17   | 8031570   | 8031970  | Promoter (7-8kb)  | 17      | 8039034   | 8048844  | -7064         | ENSG00000179593 | ALOX15B            |
| NR4A2_Medium | chr17   | 8116935   | 8117335  | Promoter (1-2kb)  | 17      | 8095900   | 8118489  | 1154          | ENSG00000179148 | ALOXE3             |
| NR4A2_Medium | chr17   | 8538304   | 8538704  | Promoter (6-7kb)  | 17      | 8542050   | 8545533  | 6829          | ENSG00000133026 | MYH10              |
| NR4A2_Medium | chr17   | 8596430   | 8596830  | Promoter (8-9kb)  | 17      | 8553928   | 8604893  | 8063          | ENSG00000133026 | MYH10              |
| NR4A2_Medium | chr17   | 8613092   | 8613492  | Promoter (8-9kb)  | 17      | 8553928   | 8604893  | -8199         | ENSG00000133026 | MYH10              |
| NR4A2_Medium | chr17   | 8736800   | 8737200  | Promoter (7-8kb)  | 17      | 8729950   | 8744787  | 7587          | ENSG00000161973 | CCDC42             |
| NR4A2_Medium | chr17   | 9020049   | 9020449  | Promoter (1-2kb)  | 17      | 9021510   | 9244000  | -1061         | ENSG00000065320 | NTN1               |
| NR4A2_Medium | chr17   | 9643946   | 9644346  | Promoter (<=1kb)  | 17      | 9644698   | 9729101  | -352          | ENSG00000154914 | USP43              |
| NR4A2_Medium | chr17   | 9658868   | 9659268  | Promoter (2-3kb)  | 17      | 9656436   | 9729684  | 2432          | ENSG00000154914 | USP43              |
| NR4A2_Medium | chr17   | 10372981  | 10373381 | Promoter (<=1kb)  | 17      | 10300865  | 10373006 | 0             | ENSG00000006788 | MYH13              |
| NR4A2_Medium | chr17   | 10385744  | 10386144 | Promoter (2-3kb)  | 17      | 10383156  | 10535231 | 2588          | NA              | MYHAS              |
| NR4A2_Medium | chr17   | 10419466  | 10419866 | Promoter (2-3kb)  | 17      | 10390322  | 10421950 | 2084          | ENSG00000133020 | MYH8               |
| NR4A2_Medium | chr17   | 10759351  | 10759751 | Promoter (6-7kb)  | 17      | 10766677  | 10769071 | -6926         | ENSG00000263400 | TMEM220-AS1        |
| NR4A2_Medium | chr17   | 10846630  | 10847036 | Promoter (8-9kb)  | 17      | 10794906  | 10838094 | -8536         | ENSG00000263429 | TMEM238L           |
| NR4A2_Medium | chr17   | 13025834  | 13026234 | Promoter (7-8kb)  | 17      | 13011693  | 13018065 | -7769         | ENSG00000006744 | ELAC2              |
| NR4A2_Medium | chr17   | 13598204  | 13598604 | Promoter (3-4kb)  | 17      | 13494032  | 13601929 | 3325          | ENSG00000153976 | HS3ST3A1           |
| NR4A2_Medium | chr17   | 15317918  | 15318318 | Promoter (9-10kb) | 17      | 15303811  | 15308863 | -9055         | ENSG00000125409 | TEKT3              |
| NR4A2_Medium | chr17   | 15685030  | 15685430 | Promoter (<=1kb)  | 17      | 15682854  | 15684311 | -719          | ENSG00000221926 | TRIM16             |
| NR4A2_Medium | chr17   | 16320083  | 16320483 | Promoter (2-3kb)  | 17      | 16317391  | 16325904 | 2692          | ENSG00000108474 | PIGL               |
| NR4A2_Medium | chr17   | 16932565  | 16932965 | Promoter (<=1kb)  | 17      | 16929281  | 16932792 | 0             | NA              | TBC1D27P           |
| NR4A2_Medium | chr17   | 16965933  | 16966333 | Promoter (5-6kb)  | 17      | 16940506  | 16972078 | 5745          | ENSG00000240505 | TNFRSF13B          |
| NR4A2_Medium | chr17   | 17346660  | 17347320 | Promoter (1-2kb)  | 17      | 17345269  | 17347152 | 1391          | ENSG00000205309 | NT5M               |
| NR4A2_Medium | chr17   | 17525049  | 17525579 | Promoter (5-6kb)  | 17      | 17505563  | 17519080 | -5969         | ENSG00000133027 | PEMT               |
| NR4A2_Medium | chr17   | 17581470  | 17581870 | Promoter (<=1kb)  | 17      | 17505563  | 17582431 | 561           | ENSG00000133027 | PEMT               |
| NR4A2_Medium | chr17   | 17864274  | 17864674 | Promoter (1-2kb)  | 17      | 17861903  | 17862780 | -1494         | ENSG00000175662 | TOM1L2             |
| NR4A2_Medium | chr17   | 17972322  | 17972722 | Promoter (<=1kb)  | 17      | 17843511  | 17972410 | 0             | ENSG00000175662 | TOM1L2             |
| NR4A2_Medium | chr17   | 17991105  | 17991505 | Promoter (1-2kb)  | 17      | 17992765  | 18016651 | -1260         | ENSG00000171962 | DRC3               |
| NR4A2_Medium | chr17   | 18000009  | 18000409 | Promoter (5-6kb)  | 17      | 17994355  | 18004451 | 5654          | ENSG00000171962 | DRC3               |
| NR4A2_Medium | chr17   | 18102100  | 18102500 | Promoter (2-3kb)  | 17      | 18104560  | 18107941 | -2060         | ENSG00000108591 | DRG2               |
| NR4A2_Medium | chr17   | 18111281  | 18111681 | Promoter (2-3kb)  | 17      | 18108756  | 18179800 | 2525          | ENSG00000091536 | MYO15A             |
| NR4A2_Medium | chr17   | 18217694  | 18218094 | Promoter (7-8kb)  | 17      | 18225635  | 18244875 | -7541         | ENSG00000131899 | LLGL1              |
| NR4A2_Medium | chr17   | 18875612  | 18876012 | Promoter (6-7kb)  | 17      | 18882589  | 18930935 | -6577         | ENSG00000141127 | PRPSAP2            |
| NR4A2_Medium | chr17   | 18968098  | 18968498 | Promoter (9-10kb) | 17      | 18976931  | 18977888 | 9390          | ENSG00000188522 | FAM83G             |
| NR4A2_Medium | chr17   | 19750289  | 19750689 | Promoter (1-2kb)  | 17      | 19743232  | 19748943 | -1346         | ENSG00000108602 | ALDH3A1            |
| NR4A2_Medium | chr17   | 19966137  | 19966537 | Promoter (8-9kb)  | 17      | 19947141  | 19958124 | -8013         | ENSG00000108599 | AKAP10             |
| NR4A2_Medium | chr17   | 20298702  | 20299102 | Promoter (1-2kb)  | 17      | 20297034  | 20306173 | 1668          | ENSG00000128487 | SPECC1             |
| NR4A2_Medium | chr17   | 20894394  | 20894794 | Promoter (1-2kb)  | 17      | 20863478  | 20895953 | 1159          | ENSG00000205212 | CCDC144NL          |
| NR4A2_Medium | chr17   | 22401758  | 22402158 | Promoter (3-4kb)  | 17      | 22406019  | 22413744 | -3861         | ENSG00000276399 | FLJ36000           |
| NR4A2_Medium | chr17   | 27418149  | 27418549 | Promoter (<=1kb)  | 17      | 27418005  | 27431623 | 144           | ENSG00000266433 | TBC1D3P5           |
| NR4A2_Medium | chr17   | 27577401  | 27577801 | Promoter (<=1kb)  | 17      | 27577456  | 27585960 | 0             | ENSG00000141068 | KSR1               |
| NR4A2_Medium | chr17   | 27607154  | 27607554 | Promoter (2-3kb)  | 17      | 27609843  | 27623694 | -2289         | ENSG00000141068 | KSR1               |
| NR4A2_Medium | chr17   | 27805639  | 27806039 | Promoter (5-6kb)  | 17      | 27756766  | 27800529 | -5110         | ENSG00000007171 | NOS2               |
| NR4A2_Medium | chr17   | 28253205  | 28253605 | Promoter (5-6kb)  | 17      | 28247444  | 28248289 | 5761          | ENSG00000265060 | PPY2P              |
| NR4A2_Medium | chr17   | 28300358  | 28300758 | Promoter (6-7kb)  | 17      | 28275986  | 28307382 | 6624          | ENSG00000265480 | KRT18P55           |
| NR4A2_Medium | chr17   | 28340394  | 28340794 | Promoter (<=1kb)  | 17      | 28340406  | 28342512 | 0             | ENSG00000109079 | TNFAIP1            |
| NR4A2_Medium | chr17   | 28732551  | 28732951 | Promoter (2-3kb)  | 17      | 28735278  | 28738245 | -2327         | ENSG00000160602 | NEK8               |
| NR4A2_Medium | chr17   | 28741552  | 28741952 | Promoter (2-3kb)  | 17      | 28744005  | 28749577 | -2053         | ENSG00000076604 | TRAF4              |
| NR4A2_Medium | chr17   | 28959528  | 28959928 | Promoter (1-2kb)  | 17      | 28960240  | 28960973 | 1045          | ENSG00000063015 | SEZ6               |
| NR4A2_Medium | chr17   | 28974216  | 28974616 | Promoter (6-7kb)  | 17      | 28954906  | 28981592 | 6976          | ENSG00000063015 | SEZ6               |
| NR4A2_Medium | chr17   | 29044472  | 29044872 | Promoter (<=1kb)  | 17      | 29044251  | 29055067 | 221           | ENSG00000179761 | PIPOX              |
| NR4A2_Medium | chr17   | 29384210  | 29384610 | Promoter (5-6kb)  | 17      | 29390464  | 29475703 | -5854         | ENSG00000160551 | TAOK1              |
| NR4A2_Medium | chr17   | 29757312  | 29757712 | Promoter (3-4kb)  | 17      | 29673840  | 29761390 | 3678          | ENSG00000141298 | SSH2               |
| NR4A2_Medium | chr17   | 30061436  | 30061836 | Promoter (5-6kb)  | 17      | 30055895  | 30059883 | 5541          | ENSG00000176927 | EFCAB5             |
| NR4A2_Medium | chr17   | 30576345  | 30576745 | Promoter (<=1kb)  | 17      | 30576485  | 30600186 | 0             | NA              | SMURF2P1-LRRC37BP1 |
| NR4A2_Medium | chr17   | 30710971  | 30711371 | Promoter (1-2kb)  | 17      | 30709608  | 30768876 | 1363          | NA              | SUZ12P1            |
| NR4A2_Medium | chr17   | 31055246  | 31055646 | Promoter (3-4kb)  | 17      | 31041971  | 31059121 | 3475          | NA              | LOC646030          |
| NR4A2_Medium | chr17   | 31092378  | 31092778 | Promoter (1-2kb)  | 17      | 31094350  | 31094425 | 1647          | ENSG00000265444 | MIR4733            |
| NR4A2_Medium | chr17   | 31494994  | 31495394 | Promoter (6-7kb)  | 17      | 31488192  | 31521184 | 6802          | ENSG00000131242 | RAB11FIP4          |
| NR4A2_Medium | chr17   | 31911090  | 31911490 | Promoter (9-10kb) | 17      | 31880181  | 31901708 | -9382         | ENSG00000108651 | UTP6               |
| NR4A2_Medium | chr17   | 32743159  | 32743559 | Promoter (5-6kb)  | 17      | 32734725  | 32749005 | 5446          | ENSG00000176658 | MYO1D              |
| NR4A2_Medium | chr17   | 32923969  | 32924369 | Promoter (3-4kb)  | 17      | 32927910  | 32941613 | -3541         | ENSG00000006042 | TMEM98             |
| NR4A2_Medium | chr17   | 35050293  | 35050693 | Promoter (7-8kb)  | 17      | 35011679  | 35042351 | -7942         | ENSG00000092871 | RFFL               |
| NR4A2_Medium | chr17   | 39111594  | 39111994 | Promoter (<=1kb)  | 17      | 39107407  | 39112177 | 183           | ENSG00000161381 | PLXDC1             |
| NR4A2_Medium | chr17   | 39134223  | 39134623 | Promoter (2-3kb)  | 17      | 39067132  | 39132037 | -2186         | ENSG00000161381 | PLXDC1             |
| NR4A2_Medium | chr17   | 39604641  | 39605041 | Promoter (2-3kb)  | 17      | 39603768  | 39607920 | 2879          | ENSG00000171532 | NEUROD2            |
| NR4A2_Medium | chr17   | 39971130  | 39971530 | Promoter (5-6kb)  | 17      | 39965523  | 39970565 | 5607          | ENSG00000167914 | GSDMA              |
| NR4A2_Medium | chr17   | 40091410  | 40091810 | Promoter (6-7kb)  | 17      | 40084434  | 40087001 | 6976          | ENSG00000126351 | THRA               |
| NR4A2_Medium | chr17   | 40148994  | 40149394 | Promoter (8-9kb)  | 17      | 40140842  | 40161864 | 8152          | ENSG00000108349 | CASC3              |
| NR4A2_Medium | chr17   | 40347475  | 40347875 | Promoter (2-3kb)  | 17      | 40345241  | 40354409 | 2234          | ENSG00000131759 | RARA               |
| NR4A2_Medium | chr17   | 40364173  | 40364573 | Promoter (<=1kb)  | 17      | 40360652  | 40364737 | 164           | ENSG00000183153 | GJD3               |
| NR4A2_Medium | chr17   | 40700148  | 40700548 | Promoter (3-4kb)  | 17      | 40697991  | 40703752 | 3204          | ENSG00000167916 | KRT24              |
| NR4A2_Medium | chr17   | 41169299  | 41169699 | Promoter (1-2kb)  | 17      | 41167231  | 41168221 | -1078         | ENSG00000196156 | KRTAP4-3           |
| NR4A2_Medium | chr17   | 41612229  | 41612629 | Promoter (<=1kb)  | 17      | 41609778  | 41612767 | 138           | ENSG00000186832 | KRT16              |
| NR4A2_Medium | chr17   | 41903456  | 41903856 | Promoter (1-2kb)  | 17      | 41904440  | 41905641 | 1785          | ENSG00000131473 | ACLY               |
| NR4A2_Medium | chr17   | 41904216  | 41904616 | Promoter (1-2kb)  | 17      | 41904440  | 41905641 | 1025          | ENSG00000131473 | ACLY               |
| NR4A2_Medium | chr17   | 41975955  | 41976355 | Promoter (4-5kb)  | 17      | 41971609  | 41973962 | 4346          | ENSG00000173786 | CNP                |
| NR4A2_Medium | chr17   | 42124049  | 42124449 | Promoter (1-2kb)  | 17      | 42122804  | 42123352 | 1245          | ENSG00000260325 | HSPB9              |
| NR4A2_Medium | chr17   | 42126322  | 42126722 | Promoter (<=1kb)  | 17      | 42119674  | 42125866 | -456          | ENSG00000108773 | KAT2A              |
| NR4A2_Medium | chr17   | 42221818  | 42222218 | Promoter (3-4kb)  | 17      | 42210417  | 42217871 | -3947         | ENSG00000173757 | STAT5B             |
| NR4A2_Medium | chr17   | 42419583  | 42419983 | Promoter (3-4kb)  | 17      | 42402449  | 42423256 | 3273          | ENSG00000177469 | CAVIN1             |
| NR4A2_Medium | chr17   | 42471738  | 42472138 | Promoter (1-2kb)  | 17      | 42470182  | 42480965 | 1556          | ENSG00000033627 | ATP6V0A1           |
| NR4A2_Medium | chr17   | 42524966  | 42525366 | Promoter (4-5kb)  | 17      | 42520383  | 42521785 | 4583          | ENSG00000033627 | ATP6V0A1           |
| NR4A2_Medium | chr17   | 42540388  | 42540788 | Promoter (<=1kb)  | 17      | 42541091  | 42543549 | -303          | ENSG00000108784 | NAGLU              |
| NR4A2_Medium | chr17   | 42566184  | 42566584 | Promoter (<=1kb)  | 17      | 42567068  | 42573239 | -484          | ENSG00000108788 | MLX                |
| NR4A2_Medium | chr17   | 42753819  | 42754219 | Promoter (4-5kb)  | 17      | 42758447  | 42761899 | -4228         | EN              |                    |

| Condition    | peakChr | peakStart | peakEnd  | annotation        | geneChr | geneStart | geneEnd  | distanceToTSS | geneID          | geneSymbol   |
|--------------|---------|-----------|----------|-------------------|---------|-----------|----------|---------------|-----------------|--------------|
| NR4A2_Medium | chr17   | 44343381  | 44343781 | Promoter (1-2kb)  | 17      | 44345246  | 44349894 | -1465         | ENSG00000030582 | GRN          |
| NR4A2_Medium | chr17   | 44470078  | 44470478 | Promoter (4-5kb)  | 17      | 44395284  | 44465935 | -4143         | ENSG00000186566 | GPATCH8      |
| NR4A2_Medium | chr17   | 44504009  | 44504409 | Promoter (<=1kb)  | 17      | 44473290  | 44503430 | -579          | ENSG00000186566 | GPATCH8      |
| NR4A2_Medium | chr17   | 44705738  | 44706138 | Promoter (2-3kb)  | 17      | 44708608  | 44752264 | -2470         | ENSG00000161692 | DBF4B        |
| NR4A2_Medium | chr17   | 44760757  | 44761157 | Promoter (1-2kb)  | 17      | 44759325  | 44779875 | 1432          | ENSG00000073670 | ADAM11       |
| NR4A2_Medium | chr17   | 44765346  | 44765746 | Promoter (4-5kb)  | 17      | 44769986  | 44780610 | -4240         | ENSG00000073670 | ADAM11       |
| NR4A2_Medium | chr17   | 44853277  | 44853677 | Promoter (<=1kb)  | 17      | 44851257  | 44854662 | 985           | ENSG00000108883 | EFTUD2       |
| NR4A2_Medium | chr17   | 45144141  | 45144541 | Promoter (3-4kb)  | 17      | 45148502  | 45152101 | -3961         | ENSG00000186834 | HEXIM1       |
| NR4A2_Medium | chr17   | 45276437  | 45276837 | Promoter (2-3kb)  | 17      | 45263135  | 45273966 | -2471         | ENSG0000006062  | MAP3K14      |
| NR4A2_Medium | chr17   | 47136806  | 47137206 | Promoter (<=1kb)  | 17      | 47120810  | 47137244 | 38            | ENSG0000004897  | CDC27        |
| NR4A2_Medium | chr17   | 47313101  | 47313501 | Promoter (7-8kb)  | 17      | 47303460  | 47305685 | -7416         | ENSG00000263293 | THCAT158     |
| NR4A2_Medium | chr17   | 47687956  | 47688356 | Promoter (5-6kb)  | 17      | 47694081  | 47698726 | -5725         | ENSG00000198933 | TBKBP1       |
| NR4A2_Medium | chr17   | 47809442  | 47809842 | Promoter (<=1kb)  | 17      | 47808216  | 47809115 | -327          | ENSG0000006025  | OSBPL7       |
| NR4A2_Medium | chr17   | 48104599  | 48104999 | Promoter (1-2kb)  | 17      | 48103357  | 48119164 | 1242          | ENSG0000002919  | SNX11        |
| NR4A2_Medium | chr17   | 48140061  | 48140461 | Promoter (2-3kb)  | 17      | 48133446  | 48137334 | -2727         | ENSG00000141293 | SKAP1        |
| NR4A2_Medium | chr17   | 48142809  | 48143209 | Promoter (5-6kb)  | 17      | 48133446  | 48137334 | -5475         | ENSG00000141293 | SKAP1        |
| NR4A2_Medium | chr17   | 48158276  | 48158676 | Promoter (1-2kb)  | 17      | 48156427  | 48156511 | -1765         | ENSG00000221739 | MIR1203      |
| NR4A2_Medium | chr17   | 48339884  | 48340284 | Promoter (5-6kb)  | 17      | 48180108  | 48345965 | 5681          | ENSG00000141293 | SKAP1        |
| NR4A2_Medium | chr17   | 48915934  | 48916334 | Promoter (<=1kb)  | 17      | 48915720  | 48927155 | 214           | ENSG00000159202 | UBE2Z        |
| NR4A2_Medium | chr17   | 49225548  | 49225948 | Promoter (<=1kb)  | 17      | 49223660  | 49226761 | 813           | ENSG00000173868 | PHOSPHO1     |
| NR4A2_Medium | chr17   | 49374687  | 49375087 | Promoter (<=1kb)  | 17      | 49375380  | 49380094 | -293          | NA              | LOC102724596 |
| NR4A2_Medium | chr17   | 50650378  | 50650778 | Promoter (7-8kb)  | 17      | 50658143  | 50663855 | -7365         | ENSG00000108846 | ABCC3        |
| NR4A2_Medium | chr17   | 50734882  | 50735282 | Promoter (1-2kb)  | 17      | 50736635  | 50741673 | -1353         | ENSG00000108848 | LUC7L3       |
| NR4A2_Medium | chr17   | 50757865  | 50758265 | Promoter (6-7kb)  | 17      | 50751051  | 50752550 | 6814          | ENSG00000108848 | LUC7L3       |
| NR4A2_Medium | chr17   | 51144103  | 51144503 | Promoter (9-10kb) | 17      | 51153536  | 51162195 | -9033         | ENSG00000239672 | NME1         |
| NR4A2_Medium | chr17   | 51210847  | 51211247 | Promoter (1-2kb)  | 17      | 51192657  | 51209404 | -1443         | ENSG0000011258  | MBTD1        |
| NR4A2_Medium | chr17   | 51435988  | 51436388 | Promoter (<=1kb)  | 17      | 51435841  | 51444037 | 147           | ENSG00000267452 | LINC02073    |
| NR4A2_Medium | chr17   | 54910629  | 54911029 | Promoter (2-3kb)  | 17      | 54913819  | 54930379 | -2790         | ENSG00000141198 | TOM1L1       |
| NR4A2_Medium | chr17   | 54930827  | 54931227 | Promoter (5-6kb)  | 17      | 54936413  | 54937484 | -5186         | ENSG00000141198 | TOM1L1       |
| NR4A2_Medium | chr17   | 55752052  | 55752452 | Promoter (<=1kb)  | 17      | 55751400  | 55777374 | 652           | ENSG00000141179 | PCTP         |
| NR4A2_Medium | chr17   | 56182978  | 56183378 | Promoter (8-9kb)  | 17      | 56174175  | 56353895 | 8803          | ENSG00000153930 | ANKFN1       |
| NR4A2_Medium | chr17   | 56463002  | 56463402 | Promoter (6-7kb)  | 17      | 56456947  | 56463906 | 6055          | ENSG00000153930 | ANKFN1       |
| NR4A2_Medium | chr17   | 56794203  | 56794603 | Promoter (<=1kb)  | 17      | 56791913  | 56795292 | 689           | ENSG00000214226 | C17orf67     |
| NR4A2_Medium | chr17   | 56986449  | 56986849 | Promoter (<=1kb)  | 17      | 56987090  | 56997102 | -241          | ENSG00000121064 | SCPEP1       |
| NR4A2_Medium | chr17   | 57433511  | 57433911 | Promoter (6-7kb)  | 17      | 57440690  | 57675059 | -6779         | ENSG00000153944 | MSI2         |
| NR4A2_Medium | chr17   | 58190405  | 58190805 | Promoter (1-2kb)  | 17      | 58192726  | 58205174 | -1921         | ENSG00000121053 | EPX          |
| NR4A2_Medium | chr17   | 58518955  | 58519355 | Promoter (<=1kb)  | 17      | 58519837  | 58556925 | -482          | ENSG00000264672 | SEPTIN4-AS1  |
| NR4A2_Medium | chr17   | 58553331  | 58553731 | Promoter (8-9kb)  | 17      | 58541587  | 58544368 | -8963         | ENSG00000108387 | SEPTIN4      |
| NR4A2_Medium | chr17   | 58565372  | 58565772 | Promoter (1-2kb)  | 17      | 58556680  | 58564258 | -1114         | ENSG00000121101 | TEX14        |
| NR4A2_Medium | chr17   | 58740673  | 58741073 | Promoter (8-9kb)  | 17      | 58732332  | 58734331 | 8341          | ENSG00000108384 | RAD51C       |
| NR4A2_Medium | chr17   | 59106939  | 59107339 | Promoter (<=1kb)  | 17      | 58982651  | 59106921 | -18           | ENSG00000108395 | TRIM37       |
| NR4A2_Medium | chr17   | 59369121  | 59369521 | Promoter (3-4kb)  | 17      | 59366083  | 59366154 | 3038          | ENSG00000263857 | MIR4729      |
| NR4A2_Medium | chr17   | 59739789  | 59740189 | Promoter (4-5kb)  | 17      | 59735338  | 59840106 | 4451          | ENSG00000062716 | VMP1         |
| NR4A2_Medium | chr17   | 59891712  | 59892112 | Promoter (<=1kb)  | 17      | 59859490  | 59892715 | 603           | ENSG00000108423 | TUBD1        |
| NR4A2_Medium | chr17   | 61023639  | 61024039 | Promoter (6-7kb)  | 17      | 61016964  | 61074988 | 6675          | ENSG00000141376 | BCAS3        |
| NR4A2_Medium | chr17   | 61486380  | 61486780 | Promoter (8-9kb)  | 17      | 61478363  | 61481346 | 8017          | ENSG00000121075 | TBX4         |
| NR4A2_Medium | chr17   | 61792191  | 61792591 | Promoter (1-2kb)  | 17      | 61776401  | 61793673 | 1082          | ENSG00000136492 | BRIP1        |
| NR4A2_Medium | chr17   | 62349430  | 62349830 | Promoter (6-7kb)  | 17      | 62355864  | 62416476 | -6034         | ENSG00000172421 | EFCAB3       |
| NR4A2_Medium | chr17   | 62696641  | 62697041 | Promoter (2-3kb)  | 17      | 62699244  | 62736107 | -2203         | ENSG00000265702 | LOC105371855 |
| NR4A2_Medium | chr17   | 63543024  | 63543424 | Promoter (7-8kb)  | 17      | 63550477  | 63594266 | -7053         | ENSG00000136485 | DCAF7        |
| NR4A2_Medium | chr17   | 64048584  | 64048984 | Promoter (5-6kb)  | 17      | 64053967  | 64054767 | 5783          | ENSG00000178607 | ERN1         |
| NR4A2_Medium | chr17   | 64178315  | 64178715 | Promoter (9-10kb) | 17      | 64154947  | 64188454 | 9739          | ENSG00000136478 | TEX2         |
| NR4A2_Medium | chr17   | 64187152  | 64187552 | Promoter (<=1kb)  | 17      | 64154947  | 64188454 | 902           | ENSG00000136478 | TEX2         |
| NR4A2_Medium | chr17   | 64239850  | 64240250 | Promoter (9-10kb) | 17      | 64147674  | 64230756 | -9094         | ENSG00000136478 | TEX2         |
| NR4A2_Medium | chr17   | 64411222  | 64411622 | Promoter (2-3kb)  | 17      | 64375051  | 64413776 | 2154          | ENSG00000261371 | PECAM1       |
| NR4A2_Medium | chr17   | 64572593  | 64572993 | Promoter (9-10kb) | 17      | 64557641  | 64563165 | -9428         | ENSG00000108854 | SMURF2       |
| NR4A2_Medium | chr17   | 64662570  | 64662970 | Promoter (<=1kb)  | 17      | 64542282  | 64662307 | -263          | ENSG00000108854 | SMURF2       |
| NR4A2_Medium | chr17   | 65103375  | 65103775 | Promoter (2-3kb)  | 17      | 65100986  | 65227690 | 2389          | ENSG00000108370 | RGS9         |
| NR4A2_Medium | chr17   | 65829502  | 65829902 | Promoter (2-3kb)  | 17      | 65635816  | 65826543 | -2959         | ENSG00000154240 | CEP112       |
| NR4A2_Medium | chr17   | 66974465  | 66974865 | Promoter (9-10kb) | 17      | 66964707  | 67033398 | 9758          | ENSG00000075461 | CACNG4       |
| NR4A2_Medium | chr17   | 67042828  | 67043228 | Promoter (1-2kb)  | 17      | 67044554  | 67056797 | -1326         | ENSG00000108878 | CACNG1       |
| NR4A2_Medium | chr17   | 67242124  | 67242524 | Promoter (1-2kb)  | 17      | 67244282  | 67273503 | -1758         | NA              | LOC101928021 |
| NR4A2_Medium | chr17   | 67562172  | 67562572 | Promoter (8-9kb)  | 17      | 67553186  | 67693367 | 8986          | ENSG00000154217 | PITPNC1      |
| NR4A2_Medium | chr17   | 67998055  | 67998455 | Promoter (1-2kb)  | 17      | 67991101  | 67996431 | -1624         | ENSG00000186665 | C17orf58     |
| NR4A2_Medium | chr17   | 68356349  | 68356749 | Promoter (9-10kb) | 17      | 68347145  | 68359786 | 9204          | ENSG00000141337 | ARSG         |
| NR4A2_Medium | chr17   | 68466536  | 68466936 | Promoter (9-10kb) | 17      | 68433509  | 68457513 | -9023         | ENSG00000070540 | WIPI1        |
| NR4A2_Medium | chr17   | 68874015  | 68874415 | Promoter (3-4kb)  | 17      | 68876314  | 68877646 | 3231          | ENSG00000141338 | ABCA8        |
| NR4A2_Medium | chr17   | 68986561  | 68986961 | Promoter (2-3kb)  | 17      | 68986608  | 68989141 | 2180          | ENSG00000154258 | ABCA9        |
| NR4A2_Medium | chr17   | 69087838  | 69088238 | Promoter (<=1kb)  | 17      | 69085654  | 69087618 | -220          | ENSG00000154262 | ABCA6        |
| NR4A2_Medium | chr17   | 69316025  | 69316425 | Promoter (<=1kb)  | 17      | 69246951  | 69315425 | -600          | ENSG00000154265 | ABCA5        |
| NR4A2_Medium | chr17   | 69539552  | 69539952 | Promoter (3-4kb)  | 17      | 69536066  | 69542011 | 3486          | ENSG00000108984 | MAP2K6       |
| NR4A2_Medium | chr17   | 69826725  | 69827125 | Promoter (7-8kb)  | 17      | 69819276  | 69902921 | 7449          | ENSG00000227517 | LINC01483    |
| NR4A2_Medium | chr17   | 70178418  | 70178818 | Promoter (8-9kb)  | 17      | 70169535  | 70180048 | 8883          | ENSG00000123700 | KCNJ2        |
| NR4A2_Medium | chr17   | 71131661  | 71132061 | Promoter (<=1kb)  | 17      | 71097786  | 71131324 | -337          | ENSG00000260785 | CASC17       |
| NR4A2_Medium | chr17   | 72048059  | 72048459 | Promoter (9-10kb) | 17      | 72037314  | 72057719 | 9260          | NA              | LOC102723517 |
| NR4A2_Medium | chr17   | 72415699  | 72416099 | Promoter (5-6kb)  | 17      | 72404660  | 72421224 | 5125          | ENSG00000227036 | LINC00673    |
| NR4A2_Medium | chr17   | 72531022  | 72531422 | Promoter (3-4kb)  | 17      | 72428267  | 72527035 | -3987         | ENSG00000227036 | LINC00673    |
| NR4A2_Medium | chr17   | 72567081  | 72567481 | Promoter (7-8kb)  | 17      | 72428267  | 72574867 | 7386          | ENSG00000227036 | LINC00673    |
| NR4A2_Medium | chr17   | 72649313  | 72649713 | Promoter (8-9kb)  | 17      | 72598040  | 72640472 | -8841         | ENSG00000227036 | LINC00511    |
| NR4A2_Medium | chr17   | 73155880  | 73156280 | Promoter (8-9kb)  | 17      | 73164977  | 73196593 | -8697         | ENSG00000180616 | SSTR2        |
| NR4A2_Medium | chr17   | 73198852  | 73199252 | Promoter (5-6kb)  | 17      | 73193093  | 73197081 | 5759          | ENSG00000166685 | COG1         |
| NR4A2_Medium | chr17   | 73232487  | 73232887 | Promoter (<=1kb)  | 17      | 73232529  | 73235810 | 0             | ENSG00000141219 | C17orf80     |
| NR4A2_Medium | chr17   | 73754603  | 73755003 | Promoter (4-5kb)  | 17      | 73750120  | 73756134 | 4483          | ENSG00000263574 | LOC100134391 |
| NR4A2_Medium | chr17   | 74465105  | 74465505 | Promoter (<=1kb)  | 17      | 74466399  | 74484794 | -894          | ENSG00000167851 | CD300A       |
| NR4A2_Medium | chr17   | 74472014  | 74472414 | Promoter (5-6kb)  | 17      | 74466862  | 74484296 | 5152          | ENSG00000167851 | CD300A       |
| NR4A2_Medium | chr17   | 74525140  | 74525540 | Promoter (5-6kb)  | 17      | 74523153  | 74531474 | 5934          | ENSG00000178789 | CD300LB      |
| NR4A2_Medium | chr17   | 74531260  | 74531660 | Promoter (<=1kb)  | 17      | 74521174  | 74531475 | 0             | ENSG00000178789 | CD300LB      |
| NR4A2_Medium | chr17   | 74734854  | 74735254 | Promoter (1-2kb)  | 17      | 74736598  | 74746192 | -1344         | ENSG00000172794 | RAB37        |
| NR4A2_Medium | chr17   | 74749816  | 74750216 | Promoter (1-2kb)  | 17      | 74748652  | 74768582 | 1164          | ENSG00000109062 | SLC9A3R1     |
| NR4A2_Medium | chr17   | 74916781  | 74917181 | Promoter (6-7kb)  | 17      | 74916083  | 74923255 | 6074          | ENSG00000182040 | USH1G        |
| NR4A2_Medium | chr17   | 74958671  | 74959071 | Promoter (<=1kb)  | 17      | 74958203  | 74959001 | 0             | ENSG00000167861 | HID1         |
| NR4A2_Medium | chr17   | 75083416  | 75083816 | Promoter (3-4kb)  | 17      | 75087727  | 75106162 | -3911         | ENSG00000170190 | SLC16A5      |
| NR4A2_Medium | chr17   | 75161445  | 75161845 | Promoter (6-7kb)  | 17      | 75147538  | 75168261 | 6416          | ENSG00000189159 | JPT1         |
| NR4A2_Medium | chr17   | 75173743  | 75174143 | Promoter (5-6kb)  | 17      | 75136148  | 75168281 | -5462         |                 |              |



| Condition    | peakChr | peakStart | peakEnd  | annotation        | geneChr | geneStart | geneEnd  | distanceToTSS | geneID          | geneSymbol  |
|--------------|---------|-----------|----------|-------------------|---------|-----------|----------|---------------|-----------------|-------------|
| NR4A2_Medium | chr17   | 75973148  | 75973548 | Promoter (5-6kb)  | 17      | 75973309  | 75978693 | 5145          | ENSG00000161533 | ACOX1       |
| NR4A2_Medium | chr17   | 76068038  | 76068438 | Promoter (3-4kb)  | 17      | 76071961  | 76079778 | -3523         | ENSG00000186919 | ZACN        |
| NR4A2_Medium | chr17   | 76101218  | 76101618 | Promoter (<=1kb)  | 17      | 76083577  | 76101853 | 235           | ENSG00000182473 | EXOC7       |
| NR4A2_Medium | chr17   | 76176718  | 76177118 | Promoter (9-10kb) | 17      | 76162761  | 76167082 | -9636         | ENSG00000141576 | RNF157      |
| NR4A2_Medium | chr17   | 76491125  | 76491525 | Promoter (1-2kb)  | 17      | 76481383  | 76493154 | 1629          | ENSG00000129667 | RHBFDF2     |
| NR4A2_Medium | chr17   | 76647925  | 76648325 | Promoter (4-5kb)  | 17      | 76624761  | 76643786 | -4139         | ENSG00000070526 | ST6GALNAC1  |
| NR4A2_Medium | chr17   | 76780463  | 76780863 | Promoter (7-8kb)  | 17      | 76773097  | 76778338 | 7366          | ENSG00000092931 | MFSD11      |
| NR4A2_Medium | chr17   | 76841134  | 76841534 | Promoter (8-9kb)  | 17      | 76849840  | 76861836 | -8306         | ENSG00000267535 | LINC00868   |
| NR4A2_Medium | chr17   | 77379539  | 77379939 | Promoter (<=1kb)  | 17      | 77380123  | 77402483 | -184          | ENSG00000184640 | SEPTIN9     |
| NR4A2_Medium | chr17   | 77484881  | 77485281 | Promoter (2-3kb)  | 17      | 77481913  | 77488788 | 2968          | ENSG00000184640 | SEPTIN9     |
| NR4A2_Medium | chr17   | 77507513  | 77507913 | Promoter (8-9kb)  | 17      | 77516887  | 77536592 | -8974         | ENSG00000267665 | LOC400622   |
| NR4A2_Medium | chr17   | 77509272  | 77509672 | Promoter (7-8kb)  | 17      | 77516887  | 77536592 | -7215         | ENSG00000267665 | LOC400622   |
| NR4A2_Medium | chr17   | 78198228  | 78198628 | Promoter (3-4kb)  | 17      | 78202509  | 78207202 | -3881         | ENSG00000183077 | AFMID       |
| NR4A2_Medium | chr17   | 78239049  | 78239449 | Promoter (7-8kb)  | 17      | 78232041  | 78240507 | 7008          | ENSG00000204278 | TMEM235     |
| NR4A2_Medium | chr17   | 78402058  | 78402458 | Promoter (1-2kb)  | 17      | 78400831  | 78421911 | 1227          | ENSG00000087157 | PGS1        |
| NR4A2_Medium | chr17   | 78444446  | 78444846 | Promoter (5-6kb)  | 17      | 78423700  | 78450298 | 5452          | ENSG00000187775 | DNAH17      |
| NR4A2_Medium | chr17   | 78478000  | 78478400 | Promoter (5-6kb)  | 17      | 78423697  | 78472774 | -5226         | ENSG00000187775 | DNAH17      |
| NR4A2_Medium | chr17   | 78492725  | 78493125 | Promoter (1-2kb)  | 17      | 78423905  | 78491490 | -1235         | ENSG00000187775 | DNAH17      |
| NR4A2_Medium | chr17   | 78831031  | 78831431 | Promoter (2-3kb)  | 17      | 78812860  | 78828964 | -2067         | ENSG00000055483 | USP36       |
| NR4A2_Medium | chr17   | 78927636  | 78928036 | Promoter (2-3kb)  | 17      | 78852977  | 78925387 | -2249         | ENSG00000035862 | TIMP2       |
| NR4A2_Medium | chr17   | 79007413  | 79007813 | Promoter (1-2kb)  | 17      | 78997666  | 79006213 | -1200         | ENSG00000171302 | CANT1       |
| NR4A2_Medium | chr17   | 79111778  | 79112178 | Promoter (3-4kb)  | 17      | 79089367  | 79115580 | 3402          | ENSG00000167281 | RBFOX3      |
| NR4A2_Medium | chr17   | 79498952  | 79499352 | Promoter (9-10kb) | 17      | 79094257  | 79508868 | 9516          | ENSG00000167281 | RBFOX3      |
| NR4A2_Medium | chr17   | 79521165  | 79521565 | Promoter (5-6kb)  | 17      | 79090816  | 79516148 | -5017         | ENSG00000167281 | RBFOX3      |
| NR4A2_Medium | chr17   | 79714697  | 79715097 | Promoter (7-8kb)  | 17      | 79707266  | 79712317 | 7431          | ENSG00000267719 | LINC02078   |
| NR4A2_Medium | chr17   | 79783559  | 79783959 | Promoter (5-6kb)  | 17      | 79778194  | 79782532 | 5365          | ENSG00000173894 | CBX2        |
| NR4A2_Medium | chr17   | 80041252  | 80041652 | Promoter (1-2kb)  | 17      | 80040005  | 80050224 | 1247          | ENSG00000141519 | CCDC40      |
| NR4A2_Medium | chr17   | 80185803  | 80186203 | Promoter (1-2kb)  | 17      | 80187800  | 80198924 | -1597         | ENSG00000141527 | CARD14      |
| NR4A2_Medium | chr17   | 80261003  | 80261403 | Promoter (<=1kb)  | 17      | 80260870  | 80321463 | 133           | ENSG00000173821 | RNF213      |
| NR4A2_Medium | chr17   | 80338963  | 80339363 | Promoter (1-2kb)  | 17      | 80337514  | 80339446 | 1449          | ENSG00000173821 | RNF213      |
| NR4A2_Medium | chr17   | 80700562  | 80700962 | Promoter (7-8kb)  | 17      | 80708933  | 80754104 | -7971         | ENSG00000141564 | RPTOR       |
| NR4A2_Medium | chr17   | 80711744  | 80712144 | Promoter (2-3kb)  | 17      | 80708933  | 80754104 | 2811          | ENSG00000141564 | RPTOR       |
| NR4A2_Medium | chr17   | 80930167  | 80930567 | Promoter (7-8kb)  | 17      | 80922724  | 80924172 | 7443          | ENSG00000141564 | RPTOR       |
| NR4A2_Medium | chr17   | 81047315  | 81047715 | Promoter (5-6kb)  | 17      | 81053362  | 81099977 | -5647         | ENSG00000175866 | BAIAP2      |
| NR4A2_Medium | chr17   | 81065723  | 81066123 | Promoter (1-2kb)  | 17      | 81063740  | 81100080 | 1983          | ENSG00000175866 | BAIAP2      |
| NR4A2_Medium | chr17   | 81103526  | 81103926 | Promoter (<=1kb)  | 17      | 81104002  | 81116048 | -76           | ENSG00000175866 | BAIAP2      |
| NR4A2_Medium | chr17   | 81169852  | 81170252 | Promoter (3-4kb)  | 17      | 81117295  | 81166221 | -3631         | ENSG00000181409 | AATK        |
| NR4A2_Medium | chr17   | 81192428  | 81192828 | Promoter (<=1kb)  | 17      | 81189827  | 81192376 | -52           | ENSG00000141577 | CEP131      |
| NR4A2_Medium | chr17   | 81253175  | 81253575 | Promoter (<=1kb)  | 17      | 81246178  | 81252273 | -902          | ENSG00000157637 | SLC38A10    |
| NR4A2_Medium | chr17   | 81310889  | 81311289 | Promoter (1-2kb)  | 17      | 81303771  | 81309248 | -1641         | NA              | LINC00482   |
| NR4A2_Medium | chr17   | 81676872  | 81677272 | Promoter (5-6kb)  | 17      | 81671589  | 81672102 | 5283          | ENSG00000185298 | CCDC137     |
| NR4A2_Medium | chr17   | 81846735  | 81847135 | Promoter (<=1kb)  | 17      | 81843961  | 81846671 | -64           | ENSG00000185624 | P4HB        |
| NR4A2_Medium | chr17   | 82005911  | 82006311 | Promoter (<=1kb)  | 17      | 82006642  | 82017404 | -331          | ENSG00000169696 | ASPSCR1     |
| NR4A2_Medium | chr17   | 82147383  | 82147783 | Promoter (3-4kb)  | 17      | 82135112  | 82151606 | 3823          | ENSG00000176155 | CCDC57      |
| NR4A2_Medium | chr17   | 82211322  | 82211722 | Promoter (1-2kb)  | 17      | 82101470  | 82212813 | 1091          | ENSG00000176155 | CCDC57      |
| NR4A2_Medium | chr17   | 82447270  | 82447670 | Promoter (<=1kb)  | 17      | 82444073  | 82447681 | 11            | ENSG00000178927 | CYBC1       |
| NR4A2_Medium | chr17   | 82561596  | 82561996 | Promoter (2-3kb)  | 17      | 82559364  | 82584030 | 2232          | ENSG00000141568 | FOXK2       |
| NR4A2_Medium | chr17   | 82662950  | 82663350 | Promoter (1-2kb)  | 17      | 82657793  | 82664895 | 1545          | ENSG00000141542 | RAB40B      |
| NR4A2_Medium | chr17   | 82690084  | 82690484 | Promoter (6-7kb)  | 17      | 82661011  | 82696870 | 6386          | ENSG00000141542 | RAB40B      |
| NR4A2_Medium | chr17   | 82846017  | 82846417 | Promoter (5-6kb)  | 17      | 82829929  | 82840022 | -5995         | ENSG00000141579 | ZNF750      |
| NR4A2_Medium | chr18   | 107981    | 108393   | Promoter (<=1kb)  | 18      | 109065    | 122219   | -672          | ENSG00000263006 | ROCK1P1     |
| NR4A2_Medium | chr18   | 110205    | 110608   | Promoter (1-2kb)  | 18      | 109065    | 122219   | 1140          | ENSG00000263006 | ROCK1P1     |
| NR4A2_Medium | chr18   | 692483    | 692883   | Promoter (<=1kb)  | 18      | 670324    | 693277   | 394           | ENSG00000132199 | ENOSF1      |
| NR4A2_Medium | chr18   | 708863    | 709263   | Promoter (2-3kb)  | 18      | 688574    | 706789   | -2074         | ENSG00000132199 | ENOSF1      |
| NR4A2_Medium | chr18   | 1409648   | 1410048  | Promoter (2-3kb)  | 18      | 1269528   | 1407244  | -2404         | NA              | LINC00470   |
| NR4A2_Medium | chr18   | 2714965   | 2715365  | Promoter (7-8kb)  | 18      | 2707444   | 2722550  | 7521          | ENSG00000101596 | SMCHD1      |
| NR4A2_Medium | chr18   | 2794868   | 2795268  | Promoter (<=1kb)  | 18      | 2796099   | 2801263  | -831          | ENSG00000101596 | SMCHD1      |
| NR4A2_Medium | chr18   | 3595802   | 3596202  | Promoter (1-2kb)  | 18      | 3594449   | 3598363  | 1353          | NA              | DLGAP1-AS1  |
| NR4A2_Medium | chr18   | 3610500   | 3610900  | Promoter (6-7kb)  | 18      | 3603738   | 3608336  | 6762          | NA              | DLGAP1-AS2  |
| NR4A2_Medium | chr18   | 5585824   | 5586224  | Promoter (8-9kb)  | 18      | 5478399   | 5577648  | -8176         | ENSG00000082397 | EPB41L3     |
| NR4A2_Medium | chr18   | 5624803   | 5625203  | Promoter (3-4kb)  | 18      | 5393103   | 5628991  | 3788          | ENSG00000082397 | EPB41L3     |
| NR4A2_Medium | chr18   | 5830869   | 5831269  | Promoter (9-10kb) | 18      | 5840695   | 5840833  | -9426         | ENSG00000272380 | MIR3976     |
| NR4A2_Medium | chr18   | 5889675   | 5890075  | Promoter (5-6kb)  | 18      | 5882072   | 5895955  | 5880          | ENSG00000206432 | TMEM200C    |
| NR4A2_Medium | chr18   | 6251803   | 6252203  | Promoter (4-5kb)  | 18      | 6256747   | 6260934  | -4544         | ENSG00000264707 | L3MBTL4-AS1 |
| NR4A2_Medium | chr18   | 6371743   | 6372143  | Promoter (2-3kb)  | 18      | 6374361   | 6374425  | 2282          | ENSG00000283532 | MIR4317     |
| NR4A2_Medium | chr18   | 6407081   | 6407481  | Promoter (6-7kb)  | 18      | 6311600   | 6414184  | 6703          | ENSG00000154655 | L3MBTL4     |
| NR4A2_Medium | chr18   | 6504800   | 6505200  | Promoter (6-7kb)  | 18      | 6511416   | 6590653  | -6216         | ENSG00000265944 | LINC01387   |
| NR4A2_Medium | chr18   | 6827530   | 6827930  | Promoter (6-7kb)  | 18      | 6834475   | 6868234  | -6545         | ENSG00000088756 | ARHGAP28    |
| NR4A2_Medium | chr18   | 6939051   | 6939451  | Promoter (9-10kb) | 18      | 6928349   | 6929966  | -9085         | ENSG00000265933 | LINC00668   |
| NR4A2_Medium | chr18   | 7125684   | 7126084  | Promoter (7-8kb)  | 18      | 6941742   | 7117797  | -7887         | ENSG00000101680 | LAMA1       |
| NR4A2_Medium | chr18   | 8129841   | 8130241  | Promoter (7-8kb)  | 18      | 8121852   | 8406666  | 7989          | ENSG00000173482 | PTPRM       |
| NR4A2_Medium | chr18   | 8600154   | 8600554  | Promoter (8-9kb)  | 18      | 8609437   | 8639381  | -8883         | ENSG00000206418 | RAB12       |
| NR4A2_Medium | chr18   | 8807984   | 8808384  | Promoter (1-2kb)  | 18      | 8809818   | 8813157  | -1434         | ENSG00000168502 | MTCL1       |
| NR4A2_Medium | chr18   | 9343035   | 9343435  | Promoter (8-9kb)  | 18      | 9334850   | 9397067  | 8185          | ENSG00000128791 | TWSG1       |
| NR4A2_Medium | chr18   | 10756336  | 10756736 | Promoter (2-3kb)  | 18      | 10759584  | 10759649 | 2860          | ENSG00000274838 | MIR6788     |
| NR4A2_Medium | chr18   | 10756977  | 10757377 | Promoter (2-3kb)  | 18      | 10759584  | 10759649 | 2272          | ENSG00000274838 | MIR6788     |
| NR4A2_Medium | chr18   | 11487257  | 11487657 | Promoter (<=1kb)  | 18      | 11487344  | 11506981 | 0             | ENSG00000267252 | LINC01255   |
| NR4A2_Medium | chr18   | 11494607  | 11495007 | Promoter (4-5kb)  | 18      | 11490224  | 11491789 | 4383          | ENSG00000267252 | LINC01255   |
| NR4A2_Medium | chr18   | 12027251  | 12027651 | Promoter (<=1kb)  | 18      | 12028608  | 12030875 | -957          | ENSG00000141401 | IMPA2       |
| NR4A2_Medium | chr18   | 12366881  | 12367281 | Promoter (6-7kb)  | 18      | 12358805  | 12360233 | -6648         | ENSG00000141385 | AFG3L2      |
| NR4A2_Medium | chr18   | 12408410  | 12408810 | Promoter (<=1kb)  | 18      | 12407948  | 12431424 | 462           | ENSG00000141391 | PRELID3A    |
| NR4A2_Medium | chr18   | 12667586  | 12667986 | Promoter (8-9kb)  | 18      | 12658738  | 12725740 | 8848          | ENSG00000128789 | PSMG2       |
| NR4A2_Medium | chr18   | 13071299  | 13071699 | Promoter (1-2kb)  | 18      | 13073116  | 13125036 | -1417         | ENSG00000101639 | CEP192      |
| NR4A2_Medium | chr18   | 13117039  | 13117439 | Promoter (<=1kb)  | 18      | 13116404  | 13125030 | 635           | ENSG00000101639 | CEP192      |
| NR4A2_Medium | chr18   | 13236575  | 13236975 | Promoter (2-3kb)  | 18      | 13239543  | 13242076 | -2568         | ENSG00000279020 | C18orf15    |
| NR4A2_Medium | chr18   | 13452870  | 13453270 | Promoter (6-7kb)  | 18      | 13459947  | 13460026 | -6677         | ENSG00000266146 | MIR5190     |
| NR4A2_Medium | chr18   | 13823062  | 13823462 | Promoter (<=1kb)  | 18      | 13824149  | 13827323 | -687          | ENSG00000176136 | MC5R        |
| NR4A2_Medium | chr18   | 21659855  | 21660255 | Promoter (2-3kb)  | 18      | 21654889  | 21656956 | -2899         | ENSG00000158201 | ABHD3       |
| NR4A2_Medium | chr18   | 22998365  | 22998765 | Promoter (4-5kb)  | 18      | 22993484  | 23026467 | 4881          | ENSG00000101773 | RBBP8       |
| NR4A2_Medium | chr18   | 23327721  | 23328121 | Promoter (3-4kb)  | 18      | 23204387  | 23331215 | 3094          | ENSG00000134490 | TMEM241     |
| NR4A2_Medium | chr18   | 23469128  | 23469528 | Promoter (2-3kb)  | 18      | 23466169  | 23481365 | 2959          | ENSG00000101782 | RIOK3       |
| NR4A2_Medium | chr18   | 23696439  | 23696839 | Promoter (6-7kb)  | 18      | 23689684  | 23954648 | 6755          | ENSG00000053747 | LAMA3       |
| NR4A2_Medium | chr18   | 24104487  | 24104887 | Promoter (8-9kb)  | 18      | 24113353  | 24135610 | -8466         | ENSG00000168234 | TTC39C      |
| NR4A2_Medium | chr18   | 24171252  | 24171652 | Promoter (8-9kb)  | 18      | 24163157  | 24179835 | 8183          | ENSG00000141447 | OSBPL1A     |
| NR4A2_Medium | chr18   | 24642185  | 24642585 | Promoter (9-10kb) | 18      | 2463      |          |               |                 |             |

| Condition    | peakChr | peakStart | peakEnd  | annotation        | geneChr | geneStart | geneEnd  | distanceToTSS | geneID          | geneSymbol   |
|--------------|---------|-----------|----------|-------------------|---------|-----------|----------|---------------|-----------------|--------------|
| NR4A2_Medium | chr18   | 35656688  | 35657088 | Promoter (2-3kb)  | 18      | 35654656  | 35709780 | 2032          | ENSG00000141429 | GALNT1       |
| NR4A2_Medium | chr18   | 36699598  | 36699998 | Promoter (6-7kb)  | 18      | 36692976  | 36717971 | 6622          | ENSG00000134775 | FHOD3        |
| NR4A2_Medium | chr18   | 36804597  | 36804997 | Promoter (2-3kb)  | 18      | 36796926  | 36807934 | 2937          | ENSG00000134779 | TPGS2        |
| NR4A2_Medium | chr18   | 37056564  | 37056964 | Promoter (9-10kb) | 18      | 37066866  | 37075648 | -9902         | ENSG00000150477 | KIAA1328     |
| NR4A2_Medium | chr18   | 37492277  | 37492677 | Promoter (6-7kb)  | 18      | 37274865  | 37486034 | -6243         | ENSG00000101489 | CELF4        |
| NR4A2_Medium | chr18   | 39807405  | 39807805 | Promoter (7-8kb)  | 18      | 39648848  | 39800322 | -7083         | ENSG00000267374 | MIR924HG     |
| NR4A2_Medium | chr18   | 41639266  | 41639666 | Promoter (7-8kb)  | 18      | 41482476  | 41632185 | -7081         | ENSG00000267313 | KC6          |
| NR4A2_Medium | chr18   | 42031036  | 42031436 | Promoter (2-3kb)  | 18      | 42033842  | 42049683 | -2406         | ENSG00000078142 | PIK3C3       |
| NR4A2_Medium | chr18   | 44976402  | 44976802 | Promoter (6-7kb)  | 18      | 44970082  | 44970166 | -6236         | ENSG00000265957 | MIR4319      |
| NR4A2_Medium | chr18   | 45848807  | 45849207 | Promoter (9-10kb) | 18      | 45855353  | 45858651 | 9444          | ENSG00000152223 | EPG5         |
| NR4A2_Medium | chr18   | 46033323  | 46033723 | Promoter (6-7kb)  | 18      | 45984233  | 46040287 | 6564          | ENSG00000152229 | PSTPIP2      |
| NR4A2_Medium | chr18   | 46089827  | 46090227 | Promoter (1-2kb)  | 18      | 46089429  | 46092198 | 1971          | ENSG00000152234 | ATP5F1A      |
| NR4A2_Medium | chr18   | 46556706  | 46557106 | Promoter (<=1kb)  | 18      | 46476972  | 46556769 | 0             | ENSG00000167210 | LOXHD1       |
| NR4A2_Medium | chr18   | 46563278  | 46563678 | Promoter (3-4kb)  | 18      | 46476974  | 46559312 | -3966         | ENSG00000167210 | LOXHD1       |
| NR4A2_Medium | chr18   | 46721422  | 46721822 | Promoter (9-10kb) | 18      | 46679243  | 46731763 | 9941          | ENSG00000101638 | ST8SIA5      |
| NR4A2_Medium | chr18   | 47074621  | 47075021 | Promoter (5-6kb)  | 18      | 47069586  | 47098948 | 5035          | ENSG00000167216 | KATNAL2      |
| NR4A2_Medium | chr18   | 47079292  | 47079692 | Promoter (9-10kb) | 18      | 47069586  | 47098948 | 9706          | ENSG00000167216 | KATNAL2      |
| NR4A2_Medium | chr18   | 48407755  | 48408155 | Promoter (1-2kb)  | 18      | 48041033  | 48409292 | 1137          | ENSG00000184828 | ZBTB7C       |
| NR4A2_Medium | chr18   | 49019474  | 49019874 | Promoter (3-4kb)  | 18      | 49023703  | 49048474 | -3829         | ENSG00000264269 | LOC100129878 |
| NR4A2_Medium | chr18   | 49360422  | 49360822 | Promoter (<=1kb)  | 18      | 49286452  | 49359872 | -550          | ENSG00000141627 | DYM          |
| NR4A2_Medium | chr18   | 49372372  | 49372772 | Promoter (3-4kb)  | 18      | 49286489  | 49368713 | -3659         | ENSG00000141627 | DYM          |
| NR4A2_Medium | chr18   | 51026503  | 51026903 | Promoter (1-2kb)  | 18      | 51028394  | 51048816 | -1491         | ENSG00000141646 | SMAD4        |
| NR4A2_Medium | chr18   | 54232253  | 54232653 | Promoter (7-8kb)  | 18      | 54151606  | 54224669 | -7584         | ENSG00000134046 | MBD2         |
| NR4A2_Medium | chr18   | 56075260  | 56075660 | Promoter (6-7kb)  | 18      | 56040332  | 56068370 | -6890         | ENSG00000206129 | LOC642484    |
| NR4A2_Medium | chr18   | 57609304  | 57609704 | Promoter (2-3kb)  | 18      | 57605934  | 57607190 | -2114         | ENSG00000134440 | NARS1        |
| NR4A2_Medium | chr18   | 57701287  | 57701687 | Promoter (6-7kb)  | 18      | 57697670  | 57708558 | 6871          | ENSG00000081923 | ATP8B1       |
| NR4A2_Medium | chr18   | 57741093  | 57741493 | Promoter (9-10kb) | 18      | 57669423  | 57731754 | -9339         | ENSG00000081923 | ATP8B1       |
| NR4A2_Medium | chr18   | 58798264  | 58798664 | Promoter (9-10kb) | 18      | 58808468  | 58834357 | -9804         | ENSG00000267593 | LINC01926    |
| NR4A2_Medium | chr18   | 59334743  | 59335143 | Promoter (1-2kb)  | 18      | 59331463  | 59333691 | -1052         | ENSG00000074695 | LMAN1        |
| NR4A2_Medium | chr18   | 61897748  | 61898148 | Promoter (3-4kb)  | 18      | 61888125  | 61894247 | -3501         | ENSG00000176641 | RNF152       |
| NR4A2_Medium | chr18   | 62181179  | 62181579 | Promoter (3-4kb)  | 18      | 62045681  | 62184671 | 3092          | ENSG00000197563 | PIGN         |
| NR4A2_Medium | chr18   | 63399913  | 63400313 | Promoter (2-3kb)  | 18      | 63390863  | 63397124 | -2789         | ENSG00000119541 | VPS4B        |
| NR4A2_Medium | chr18   | 63767368  | 63767768 | Promoter (7-8kb)  | 18      | 63775375  | 63805376 | -7607         | ENSG00000166396 | SERPINB7     |
| NR4A2_Medium | chr18   | 64110242  | 64110642 | Promoter (6-7kb)  | 18      | 64104091  | 64423601 | 6151          | ENSG00000267134 | LINC01924    |
| NR4A2_Medium | chr18   | 65758922  | 65759322 | Promoter (3-4kb)  | 18      | 65763008  | 65803810 | -3686         | ENSG00000081138 | CDH7         |
| NR4A2_Medium | chr18   | 68792622  | 68793022 | Promoter (5-6kb)  | 18      | 68798080  | 69055189 | -5058         | ENSG00000150636 | CCDC102B     |
| NR4A2_Medium | chr18   | 70014106  | 70014506 | Promoter (5-6kb)  | 18      | 70003820  | 70009032 | -5074         | ENSG00000176225 | RTTN         |
| NR4A2_Medium | chr18   | 72543877  | 72544277 | Promoter (<=1kb)  | 18      | 72536681  | 72544342 | 65            | ENSG00000141668 | CBLN2        |
| NR4A2_Medium | chr18   | 74489619  | 74490019 | Promoter (5-6kb)  | 18      | 74495816  | 74508874 | -5797         | ENSG00000133313 | CNDP2        |
| NR4A2_Medium | chr18   | 74551436  | 74551836 | Promoter (9-10kb) | 18      | 74560963  | 74576735 | -9127         | ENSG00000150656 | CNDP1        |
| NR4A2_Medium | chr18   | 76206317  | 76206717 | Promoter (2-3kb)  | 18      | 76209422  | 76215824 | -2705         | ENSG00000264260 | LINC01893    |
| NR4A2_Medium | chr18   | 76217730  | 76218130 | Promoter (8-9kb)  | 18      | 76209476  | 76215824 | 8254          | ENSG00000264260 | LINC01893    |
| NR4A2_Medium | chr18   | 76531633  | 76532033 | Promoter (<=1kb)  | 18      | 76532380  | 76558493 | -347          | ENSG00000266256 | LINC00908    |
| NR4A2_Medium | chr18   | 76896001  | 76896401 | Promoter (1-2kb)  | 18      | 76898092  | 76899123 | -1691         | ENSG00000130856 | ZNF236       |
| NR4A2_Medium | chr18   | 77258606  | 77259006 | Promoter (4-5kb)  | 18      | 77253740  | 77256217 | 4866          | ENSG00000166573 | GALR1        |
| NR4A2_Medium | chr18   | 79452555  | 79452955 | Promoter (1-2kb)  | 18      | 79451079  | 79452131 | 1476          | ENSG00000131196 | NFATC1       |
| NR4A2_Medium | chr18   | 79866763  | 79867163 | Promoter (3-4kb)  | 18      | 79863668  | 79899816 | 3095          | ENSG00000178342 | KCNG2        |
| NR4A2_Medium | chr18   | 79992749  | 79993149 | Promoter (4-5kb)  | 18      | 79973534  | 79988581 | -4168         | ENSG00000141759 | TXNL4A       |
| NR4A2_Medium | chr19   | 301496    | 301896   | Promoter (7-8kb)  | 19      | 305573    | 308923   | 7027          | ENSG00000105556 | MIER2        |
| NR4A2_Medium | chr19   | 304015    | 304415   | Promoter (4-5kb)  | 19      | 305573    | 308923   | 4508          | ENSG00000105556 | MIER2        |
| NR4A2_Medium | chr19   | 309362    | 309762   | Promoter (<=1kb)  | 19      | 305573    | 308923   | -439          | ENSG00000105556 | MIER2        |
| NR4A2_Medium | chr19   | 311995    | 312395   | Promoter (3-4kb)  | 19      | 305573    | 308923   | -3072         | ENSG00000105556 | MIER2        |
| NR4A2_Medium | chr19   | 466969    | 467369   | Promoter (5-6kb)  | 19      | 464167    | 472615   | 5246          | ENSG00000181781 | ODF3L2       |
| NR4A2_Medium | chr19   | 526115    | 526515   | Promoter (5-6kb)  | 19      | 531760    | 542087   | -5245         | ENSG00000099804 | CDC34        |
| NR4A2_Medium | chr19   | 650045    | 650445   | Promoter (<=1kb)  | 19      | 647530    | 650594   | 149           | ENSG00000070423 | RNF126       |
| NR4A2_Medium | chr19   | 713901    | 714301   | Promoter (4-5kb)  | 19      | 709131    | 736139   | 4770          | ENSG00000099864 | PALM         |
| NR4A2_Medium | chr19   | 756426    | 756826   | Promoter (1-2kb)  | 19      | 758063    | 760505   | -1237         | ENSG00000099812 | MISP         |
| NR4A2_Medium | chr19   | 759546    | 759946   | Promoter (1-2kb)  | 19      | 758063    | 760505   | 1483          | ENSG00000099812 | MISP         |
| NR4A2_Medium | chr19   | 818273    | 818673   | Promoter (3-4kb)  | 19      | 812488    | 821952   | 3279          | ENSG00000129951 | PLPPR3       |
| NR4A2_Medium | chr19   | 938295    | 938695   | Promoter (5-6kb)  | 19      | 932565    | 964366   | 5730          | ENSG00000116017 | ARID3A       |
| NR4A2_Medium | chr19   | 977651    | 978051   | Promoter (6-7kb)  | 19      | 984271    | 994570   | -6220         | ENSG00000065268 | WDR18        |
| NR4A2_Medium | chr19   | 1106025   | 1106425  | Promoter (<=1kb)  | 19      | 1105454   | 1106779  | 571           | ENSG00000167468 | GPX4         |
| NR4A2_Medium | chr19   | 1282433   | 1282833  | Promoter (3-4kb)  | 19      | 1285873   | 1301431  | -3040         | ENSG00000099617 | EFNA2        |
| NR4A2_Medium | chr19   | 1570516   | 1570916  | Promoter (2-3kb)  | 19      | 1554669   | 1568058  | -2458         | ENSG00000181588 | MEX3D        |
| NR4A2_Medium | chr19   | 1846235   | 1846635  | Promoter (1-2kb)  | 19      | 1827648   | 1848446  | 1811          | ENSG00000079313 | REXO1        |
| NR4A2_Medium | chr19   | 1868051   | 1868451  | Promoter (4-5kb)  | 19      | 1852399   | 1863579  | -4472         | ENSG00000129911 | KLF16        |
| NR4A2_Medium | chr19   | 1946901   | 1947301  | Promoter (4-5kb)  | 19      | 1942459   | 1978345  | 4442          | ENSG00000133275 | CSNK1G2      |
| NR4A2_Medium | chr19   | 2036836   | 2037236  | Promoter (1-2kb)  | 19      | 1993101   | 2034881  | -1955         | ENSG00000133243 | BTBD2        |
| NR4A2_Medium | chr19   | 2054934   | 2055334  | Promoter (3-4kb)  | 19      | 2046461   | 2051244  | -3690         | ENSG00000099875 | MKMK2        |
| NR4A2_Medium | chr19   | 2104328   | 2104728  | Promoter (5-6kb)  | 19      | 2098902   | 2099588  | 5426          | ENSG00000099840 | IZUMO4       |
| NR4A2_Medium | chr19   | 2279891   | 2280291  | Promoter (1-2kb)  | 19      | 2274631   | 2282175  | 1884          | ENSG00000188305 | PEAK3        |
| NR4A2_Medium | chr19   | 2330163   | 2330563  | Promoter (1-2kb)  | 19      | 2328696   | 2342503  | 1467          | ENSG00000005206 | SPPL2B       |
| NR4A2_Medium | chr19   | 2336535   | 2336935  | Promoter (<=1kb)  | 19      | 2337111   | 2339877  | -176          | ENSG00000005206 | SPPL2B       |
| NR4A2_Medium | chr19   | 2357255   | 2357959  | Promoter (2-3kb)  | 19      | 2360238   | 2426239  | -2279         | ENSG00000178297 | TMPRSS9      |
| NR4A2_Medium | chr19   | 2415981   | 2416381  | Promoter (<=1kb)  | 19      | 2416243   | 2418026  | 0             | ENSG00000178297 | TMPRSS9      |
| NR4A2_Medium | chr19   | 2744008   | 2744408  | Promoter (3-4kb)  | 19      | 2717769   | 2740048  | -3960         | ENSG00000141873 | SLC39A3      |
| NR4A2_Medium | chr19   | 2936274   | 2936674  | Promoter (8-9kb)  | 19      | 2933218   | 2944971  | 8297          | ENSG00000175691 | ZNF77        |
| NR4A2_Medium | chr19   | 3042055   | 3042455  | Promoter (3-4kb)  | 19      | 3013791   | 3045730  | 3275          | ENSG00000065717 | TLE2         |
| NR4A2_Medium | chr19   | 3069420   | 3069820  | Promoter (6-7kb)  | 19      | 3052910   | 3063107  | -6313         | ENSG00000104964 | TLE5         |
| NR4A2_Medium | chr19   | 3110327   | 3110727  | Promoter (2-3kb)  | 19      | 3113463   | 3121457  | -2736         | ENSG00000088256 | GNA11        |
| NR4A2_Medium | chr19   | 3115672   | 3116072  | Promoter (<=1kb)  | 19      | 3114947   | 3115428  | 725           | ENSG00000088256 | GNA11        |
| NR4A2_Medium | chr19   | 3121388   | 3121788  | Promoter (2-3kb)  | 19      | 3118813   | 3119353  | 2575          | ENSG00000088256 | GNA11        |
| NR4A2_Medium | chr19   | 3138609   | 3139009  | Promoter (2-3kb)  | 19      | 3136442   | 3151822  | 2167          | ENSG00000060558 | GNA15        |
| NR4A2_Medium | chr19   | 3233411   | 3233811  | Promoter (7-8kb)  | 19      | 3225485   | 3297016  | 7926          | ENSG00000161082 | CELF5        |
| NR4A2_Medium | chr19   | 3235464   | 3235864  | Promoter (9-10kb) | 19      | 3225485   | 3297016  | 9979          | ENSG00000161082 | CELF5        |
| NR4A2_Medium | chr19   | 3310696   | 3311096  | Promoter (3-4kb)  | 19      | 3314403   | 3469217  | -3307         | ENSG00000141905 | NFIC         |
| NR4A2_Medium | chr19   | 3322708   | 3323108  | Promoter (8-9kb)  | 19      | 3314403   | 3469217  | 8305          | ENSG00000141905 | NFIC         |
| NR4A2_Medium | chr19   | 3491929   | 3492329  | Promoter (1-2kb)  | 19      | 3491310   | 3494171  | 1842          | ENSG00000129932 | DOHH         |
| NR4A2_Medium | chr19   | 3511642   | 3512042  | Promoter (5-6kb)  | 19      | 3506377   | 3527060  | 5265          | ENSG00000105325 | FZR1         |
| NR4A2_Medium | chr19   | 3529171   | 3529571  | Promoter (2-3kb)  | 19      | 3532483   | 3533748  | -2912         | ENSG00000105325 | FZR1         |
| NR4A2_Medium | chr19   | 3672768   | 3673168  | Promoter (5-6kb)  | 19      | 3661930   | 3667344  | -5424         | ENSG00000186111 | PIP5K1C      |
| NR4A2_Medium | chr19   | 3675386   | 3675786  | Promoter (8-9kb)  | 19      | 3661930   | 3667344  | -8042         | ENSG00000186111 | PIP5K1C      |
| NR4A2_Medium | chr19   | 3923523   | 3923923  | Promoter (9-10kb) | 19      | 3933103   | 3942414  | -9180         | ENSG00000077009 | NMRK2        |
| NR4A2_Medium | chr19   | 3942876   | 3943276  | Promoter (6-7kb)  | 19      | 3936622   | 3942174  | 6254          | ENSG00000077009 | NMRK2        |
| NR4A2_Medium | chr19   | 4096860   | 4097260  | Promoter (2-3kb)  | 19      | 4095388   | 4100072  | 2812          | ENSG00000126934 | MAP2K2       |
| NR4A2_Medium | chr19   | 4151300   | 4151700  | Promoter (1-2kb)  | 19      | 4153631   |          |               |                 |              |



| Condition    | peakChr | peakStart | peakEnd  | annotation        | geneChr | geneStart | geneEnd  | distanceToTSS | geneID          | geneSymbol    |
|--------------|---------|-----------|----------|-------------------|---------|-----------|----------|---------------|-----------------|---------------|
| NR4A2_Medium | chr19   | 5087880   | 5088280  | Promoter (5-6kb)  | 19      | 5082452   | 5141503  | 5428          | ENSG00000127663 | KDM4B         |
| NR4A2_Medium | chr19   | 5119097   | 5119497  | Promoter (6-7kb)  | 19      | 5112358   | 5119682  | 6739          | ENSG00000127663 | KDM4B         |
| NR4A2_Medium | chr19   | 5296476   | 5296876  | Promoter (3-4kb)  | 19      | 5273549   | 5293252  | -3224         | ENSG00000105426 | PTPRS         |
| NR4A2_Medium | chr19   | 5566164   | 5566564  | Promoter (1-2kb)  | 19      | 5561632   | 5567831  | 1267          | ENSG00000223573 | TINCR         |
| NR4A2_Medium | chr19   | 5988574   | 5988974  | Promoter (8-9kb)  | 19      | 5994816   | 5997373  | 8399          | ENSG00000087903 | RFX2          |
| NR4A2_Medium | chr19   | 6225335   | 6225735  | Promoter (8-9kb)  | 19      | 6213120   | 6216968  | -8367         | ENSG00000130382 | MLLT1         |
| NR4A2_Medium | chr19   | 6429310   | 6429710  | Promoter (4-5kb)  | 19      | 6426039   | 6433762  | 4052          | ENSG00000181240 | SLC25A41      |
| NR4A2_Medium | chr19   | 6709962   | 6710362  | Promoter (<=1kb)  | 19      | 6709756   | 6710957  | 595           | ENSG00000125730 | C3            |
| NR4A2_Medium | chr19   | 7175417   | 7175817  | Promoter (7-8kb)  | 19      | 7159423   | 7167978  | -7439         | ENSG00000171105 | INSR          |
| NR4A2_Medium | chr19   | 7363396   | 7363796  | Promoter (7-8kb)  | 19      | 7355616   | 7383385  | 7780          | ENSG00000104880 | ARHGEF18      |
| NR4A2_Medium | chr19   | 7474012   | 7474412  | Promoter (8-9kb)  | 19      | 7476894   | 7483312  | 8900          | ENSG00000104883 | PEX11G        |
| NR4A2_Medium | chr19   | 7739710   | 7740110  | Promoter (5-6kb)  | 19      | 7730821   | 7733906  | -5804         | ENSG00000182566 | CLEC4G        |
| NR4A2_Medium | chr19   | 7928724   | 7929124  | Promoter (2-3kb)  | 19      | 7927824   | 7931381  | 2257          | ENSG00000104980 | TIMM44        |
| NR4A2_Medium | chr19   | 8044762   | 8045162  | Promoter (7-8kb)  | 19      | 8052767   | 8062622  | -7605         | ENSG00000131142 | CCL25         |
| NR4A2_Medium | chr19   | 8090252   | 8090652  | Promoter (<=1kb)  | 19      | 8087204   | 8090233  | -19           | ENSG00000142449 | FBN3          |
| NR4A2_Medium | chr19   | 8149656   | 8150056  | Promoter (<=1kb)  | 19      | 8065402   | 8149592  | -64           | ENSG00000142449 | FBN3          |
| NR4A2_Medium | chr19   | 8310372   | 8310772  | Promoter (2-3kb)  | 19      | 8302127   | 8308358  | -2014         | ENSG00000167775 | CD320         |
| NR4A2_Medium | chr19   | 8331562   | 8331962  | Promoter (2-3kb)  | 19      | 8332745   | 8334430  | 2468          | ENSG00000186994 | KANK3         |
| NR4A2_Medium | chr19   | 8408017   | 8408417  | Promoter (4-5kb)  | 19      | 8413270   | 8439004  | -4853         | ENSG00000099785 | MARCHF2       |
| NR4A2_Medium | chr19   | 8459745   | 8460145  | Promoter (1-2kb)  | 19      | 8461969   | 8465372  | -1824         | ENSG00000099783 | HNRNPM        |
| NR4A2_Medium | chr19   | 8518341   | 8518741  | Promoter (4-5kb)  | 19      | 8509678   | 8514167  | -4174         | ENSG00000133250 | ZNF414        |
| NR4A2_Medium | chr19   | 8528628   | 8529028  | Promoter (1-2kb)  | 19      | 8522810   | 8527387  | -1241         | ENSG00000142347 | MYO1F         |
| NR4A2_Medium | chr19   | 8867525   | 8867925  | Promoter (<=1kb)  | 19      | 8863316   | 8867014  | -511          | ENSG00000181143 | MUC16         |
| NR4A2_Medium | chr19   | 9325463   | 9325863  | Promoter (<=1kb)  | 19      | 9324712   | 9380132  | 751           | ENSG00000270011 | ZNF559-ZNF177 |
| NR4A2_Medium | chr19   | 9587790   | 9588190  | Promoter (3-4kb)  | 19      | 9565782   | 9584533  | -3257         | ENSG00000197961 | ZNF121        |
| NR4A2_Medium | chr19   | 9767914   | 9768314  | Promoter (<=1kb)  | 19      | 9757475   | 9768305  | 0             | ENSG00000196605 | ZNF846        |
| NR4A2_Medium | chr19   | 9819241   | 9819641  | Promoter (<=1kb)  | 19      | 9811550   | 9819103  | -138          | ENSG00000127452 | FBXL12        |
| NR4A2_Medium | chr19   | 10122166  | 10122566 | Promoter (2-3kb)  | 19      | 10118887  | 10119918 | -2248         | ENSG00000130811 | EIF3G         |
| NR4A2_Medium | chr19   | 10137182  | 10137582 | Promoter (<=1kb)  | 19      | 10137467  | 10138470 | 888           | ENSG00000130816 | DNMT1         |
| NR4A2_Medium | chr19   | 10162623  | 10163023 | Promoter (<=1kb)  | 19      | 10160207  | 10162983 | 0             | ENSG00000130816 | DNMT1         |
| NR4A2_Medium | chr19   | 10263325  | 10263725 | Promoter (7-8kb)  | 19      | 10271093  | 10285583 | -7368         | ENSG00000090339 | ICAM1         |
| NR4A2_Medium | chr19   | 10545386  | 10545786 | Promoter (<=1kb)  | 19      | 10545120  | 10552121 | 266           | ENSG00000130734 | ATG4D         |
| NR4A2_Medium | chr19   | 10820415  | 10820815 | Promoter (2-3kb)  | 19      | 10823224  | 10833484 | -2409         | ENSG00000079805 | DNM2          |
| NR4A2_Medium | chr19   | 10992611  | 10993011 | Promoter (1-2kb)  | 19      | 10991260  | 11062266 | 1351          | ENSG00000127616 | SMARCA4       |
| NR4A2_Medium | chr19   | 11197733  | 11198133 | Promoter (<=1kb)  | 19      | 11192432  | 11197791 | 0             | ENSG00000197256 | KANK2         |
| NR4A2_Medium | chr19   | 11247799  | 11248199 | Promoter (5-6kb)  | 19      | 11252404  | 11253667 | 5468          | ENSG00000130158 | DOCK6         |
| NR4A2_Medium | chr19   | 11310694  | 11311094 | Promoter (3-4kb)  | 19      | 11306724  | 11312322 | 3970          | ENSG00000130167 | TSPAN16       |
| NR4A2_Medium | chr19   | 11409048  | 11409448 | Promoter (1-2kb)  | 19      | 11394056  | 11411270 | 1822          | ENSG00000205517 | RGL3          |
| NR4A2_Medium | chr19   | 11579286  | 11579686 | Promoter (<=1kb)  | 19      | 11577160  | 11579008 | -278          | ENSG00000102575 | ACP5          |
| NR4A2_Medium | chr19   | 11649163  | 11649563 | Promoter (9-10kb) | 19      | 11639776  | 11686569 | 9387          | NA              | ZNF833P       |
| NR4A2_Medium | chr19   | 11871690  | 11872090 | Promoter (5-6kb)  | 19      | 11865957  | 11869491 | 5733          | ENSG00000171291 | ZNF439        |
| NR4A2_Medium | chr19   | 11950843  | 11951243 | Promoter (<=1kb)  | 19      | 11950242  | 11977198 | 601           | ENSG00000197054 | ZNF763        |
| NR4A2_Medium | chr19   | 11961647  | 11962047 | Promoter (2-3kb)  | 19      | 11965037  | 11978395 | -2990         | ENSG00000197054 | ZNF763        |
| NR4A2_Medium | chr19   | 11975543  | 11975943 | Promoter (<=1kb)  | 19      | 11976822  | 11978275 | -879          | ENSG00000197054 | ZNF763        |
| NR4A2_Medium | chr19   | 12153321  | 12153721 | Promoter (2-3kb)  | 19      | 12144890  | 12156714 | 2993          | ENSG00000257591 | ZNF625        |
| NR4A2_Medium | chr19   | 12155364  | 12155764 | Promoter (<=1kb)  | 19      | 12144890  | 12156714 | 950           | ENSG00000257591 | ZNF625        |
| NR4A2_Medium | chr19   | 12766140  | 12766540 | Promoter (<=1kb)  | 19      | 12764348  | 12766523 | 0             | ENSG00000095066 | HOOK2         |
| NR4A2_Medium | chr19   | 12933145  | 12933545 | Promoter (<=1kb)  | 19      | 12928410  | 12933642 | 97            | ENSG00000179115 | FARSA         |
| NR4A2_Medium | chr19   | 13219995  | 13220395 | Promoter (4-5kb)  | 19      | 13214440  | 13224956 | 4561          | ENSG00000141837 | CACNA1A       |
| NR4A2_Medium | chr19   | 14427147  | 14427547 | Promoter (5-6kb)  | 19      | 14433053  | 14446436 | -5506         | ENSG00000123143 | PKN1          |
| NR4A2_Medium | chr19   | 14442977  | 14443377 | Promoter (2-3kb)  | 19      | 14440373  | 14441434 | 2604          | ENSG00000123143 | PKN1          |
| NR4A2_Medium | chr19   | 14508170  | 14508570 | Promoter (8-9kb)  | 19      | 14517085  | 14563738 | -8515         | ENSG00000099797 | TECR          |
| NR4A2_Medium | chr19   | 14542795  | 14543195 | Promoter (2-3kb)  | 19      | 14545724  | 14564073 | -2529         | ENSG00000099797 | TECR          |
| NR4A2_Medium | chr19   | 14685582  | 14685982 | Promoter (3-4kb)  | 19      | 14689801  | 14707262 | -3819         | ENSG00000160961 | ZNF333        |
| NR4A2_Medium | chr19   | 14763562  | 14763962 | Promoter (8-9kb)  | 19      | 14743764  | 14772374 | 8412          | ENSG00000127507 | ADGRE2        |
| NR4A2_Medium | chr19   | 14877352  | 14877752 | Promoter (3-4kb)  | 19      | 14880326  | 14881452 | 3700          | ENSG00000185385 | OR7A17        |
| NR4A2_Medium | chr19   | 14980408  | 14980808 | Promoter (<=1kb)  | 19      | 14961310  | 14980298 | -110          | ENSG00000105143 | SLC1A6        |
| NR4A2_Medium | chr19   | 15055507  | 15055907 | Promoter (<=1kb)  | 19      | 15054902  | 15056278 | 605           | ENSG00000105141 | CASP14        |
| NR4A2_Medium | chr19   | 15099074  | 15099474 | Promoter (7-8kb)  | 19      | 15107401  | 15114974 | -7927         | ENSG00000105137 | SYDE1         |
| NR4A2_Medium | chr19   | 15223123  | 15223523 | Promoter (8-9kb)  | 19      | 15226919  | 15232448 | 8925          | ENSG00000105131 | EPHX3         |
| NR4A2_Medium | chr19   | 15247734  | 15248134 | Promoter (7-8kb)  | 19      | 15253751  | 15255366 | 7232          | ENSG00000141867 | BRD4          |
| NR4A2_Medium | chr19   | 15248295  | 15248695 | Promoter (6-7kb)  | 19      | 15253751  | 15255366 | 6671          | ENSG00000141867 | BRD4          |
| NR4A2_Medium | chr19   | 15804153  | 15804553 | Promoter (3-4kb)  | 19      | 15807003  | 15808126 | 3573          | ENSG00000186723 | OR10H1        |
| NR4A2_Medium | chr19   | 15812380  | 15812780 | Promoter (4-5kb)  | 19      | 15807003  | 15808126 | -4254         | ENSG00000186723 | OR10H1        |
| NR4A2_Medium | chr19   | 16017278  | 16017678 | Promoter (<=1kb)  | 19      | 16016905  | 16018755 | 373           | ENSG00000205396 | LINC00661     |
| NR4A2_Medium | chr19   | 16069150  | 16069550 | Promoter (1-2kb)  | 19      | 16067733  | 16102875 | 1417          | ENSG00000167460 | TPM4          |
| NR4A2_Medium | chr19   | 16203391  | 16203791 | Promoter (<=1kb)  | 19      | 16203463  | 16206494 | 0             | ENSG00000072958 | AP1M1         |
| NR4A2_Medium | chr19   | 16407949  | 16408349 | Promoter (4-5kb)  | 19      | 16382989  | 16403745 | -4204         | ENSG00000127527 | EPS15L1       |
| NR4A2_Medium | chr19   | 16531980  | 16532380 | Promoter (5-6kb)  | 19      | 16518957  | 16526274 | -5706         | ENSG00000085872 | CHERP         |
| NR4A2_Medium | chr19   | 16560787  | 16561187 | Promoter (3-4kb)  | 19      | 16553389  | 16564255 | 3068          | ENSG00000127526 | SLC35E1       |
| NR4A2_Medium | chr19   | 16874812  | 16875212 | Promoter (<=1kb)  | 19      | 16875931  | 16878706 | -719          | ENSG00000127511 | SIN3B         |
| NR4A2_Medium | chr19   | 17082852  | 17083252 | Promoter (7-8kb)  | 19      | 17075786  | 17213284 | 7066          | ENSG00000099331 | MYO9B         |
| NR4A2_Medium | chr19   | 17188540  | 17188940 | Promoter (4-5kb)  | 19      | 17184511  | 17186000 | 4029          | ENSG00000099331 | MYO9B         |
| NR4A2_Medium | chr19   | 17286446  | 17286846 | Promoter (3-4kb)  | 19      | 17264107  | 17282786 | -3660         | ENSG00000130307 | USHBP1        |
| NR4A2_Medium | chr19   | 17350769  | 17351169 | Promoter (9-10kb) | 19      | 17340946  | 17341664 | 9823          | ENSG00000130299 | GTPBP3        |
| NR4A2_Medium | chr19   | 17367977  | 17368377 | Promoter (1-2kb)  | 19      | 17351450  | 17366151 | -1826         | ENSG00000130300 | PLVAP         |
| NR4A2_Medium | chr19   | 17509203  | 17509603 | Promoter (1-2kb)  | 19      | 17503436  | 17511468 | 1865          | ENSG00000269439 | LOC100507551  |
| NR4A2_Medium | chr19   | 17633454  | 17633854 | Promoter (5-6kb)  | 19      | 17626288  | 17628337 | -5117         | ENSG00000130477 | UNC13A        |
| NR4A2_Medium | chr19   | 18215173  | 18215573 | Promoter (5-6kb)  | 19      | 18210929  | 18221122 | 5549          | ENSG00000105650 | PDE4C         |
| NR4A2_Medium | chr19   | 18441978  | 18442378 | Promoter (3-4kb)  | 19      | 18444516  | 18445399 | 3021          | ENSG00000105656 | ELL           |
| NR4A2_Medium | chr19   | 18446320  | 18446720 | Promoter (<=1kb)  | 19      | 18444516  | 18445399 | -921          | ENSG00000105656 | ELL           |
| NR4A2_Medium | chr19   | 18475081  | 18475481 | Promoter (<=1kb)  | 19      | 18444751  | 18475933 | 452           | ENSG00000105656 | ELL           |
| NR4A2_Medium | chr19   | 18535362  | 18535762 | Promoter (1-2kb)  | 19      | 18532129  | 18537704 | 1942          | ENSG00000105701 | FKBP8         |
| NR4A2_Medium | chr19   | 18647423  | 18647823 | Promoter (2-3kb)  | 19      | 18644638  | 18667992 | 2785          | ENSG00000167487 | KLHL26        |
| NR4A2_Medium | chr19   | 18783533  | 18783933 | Promoter (3-4kb)  | 19      | 18786118  | 18787035 | 3102          | ENSG00000105664 | COMP          |
| NR4A2_Medium | chr19   | 18795005  | 18795405 | Promoter (3-4kb)  | 19      | 18782774  | 18791305 | -3700         | ENSG00000105664 | COMP          |
| NR4A2_Medium | chr19   | 18870769  | 18871169 | Promoter (7-8kb)  | 19      | 18862933  | 18868229 | 7836          | ENSG00000005007 | UPF1          |
| NR4A2_Medium | chr19   | 18950222  | 18950622 | Promoter (8-9kb)  | 19      | 18931586  | 18941261 | -8961         | ENSG00000051128 | HOMER3        |
| NR4A2_Medium | chr19   | 19061494  | 19061894 | Promoter (2-3kb)  | 19      | 19063994  | 19113030 | -2100         | ENSG00000181035 | SLC25A42      |
| NR4A2_Medium | chr19   | 19141484  | 19141884 | Promoter (2-3kb)  | 19      | 19130265  | 19138513 | -2971         | ENSG00000064545 | TMEM161A      |
| NR4A2_Medium | chr19   | 19239727  | 19240127 | Promoter (1-2kb)  | 19      | 19238392  | 19249019 | 1335          | ENSG00000130287 | NCAN          |
| NR4A2_Medium | chr19   | 19262218  | 19262618 | Promoter (<=1kb)  | 19      | 19254756  | 19262804 | 186           | ENSG00000187664 | HAPLN4        |
| NR4A2_Medium | chr19   | 19480717  | 19481117 | Promoter (8-9kb)  | 19      | 19472410  | 19492429 | 8307          | ENSG00000167491 | GATAD2A       |
| NR4A2_Medium | chr19   | 19534226  | 19534626 | Promoter (3-4kb)  | 19      | 19538248  | 19546659 | -3622         | ENSG00000160161 | CILP2         |
| NR4A2_Medium | chr19   | 19538800  | 19539200 | Promoter (<=1kb)  | 19      | 19538265  | 19546659 | 535           | ENSG000001601   |               |

| Condition    | peakChr | peakStart | peakEnd  | annotation        | geneChr | geneStart | geneEnd  | distanceToTSS | geneID          | geneSymbol  |
|--------------|---------|-----------|----------|-------------------|---------|-----------|----------|---------------|-----------------|-------------|
| NR4A2_Medium | chr19   | 29517460  | 29517860 | Promoter (7-8kb)  | 19      | 29412231  | 29525734 | 7874          | ENSG00000264515 | LOC284395   |
| NR4A2_Medium | chr19   | 32570850  | 32571250 | Promoter (9-10kb) | 19      | 32581190  | 32587453 | -9940         | ENSG00000105185 | PDCD5       |
| NR4A2_Medium | chr19   | 32581688  | 32582088 | Promoter (<=1kb)  | 19      | 32581526  | 32587414 | 162           | ENSG00000105185 | PDCD5       |
| NR4A2_Medium | chr19   | 32635832  | 32636232 | Promoter (7-8kb)  | 19      | 32626807  | 32643300 | 7068          | ENSG00000105186 | ANKRD27     |
| NR4A2_Medium | chr19   | 32673267  | 32673667 | Promoter (1-2kb)  | 19      | 32644397  | 32675147 | 1480          | ENSG00000105186 | ANKRD27     |
| NR4A2_Medium | chr19   | 32818081  | 32818481 | Promoter (2-3kb)  | 19      | 32815563  | 32829580 | 2518          | ENSG00000173809 | TDRD12      |
| NR4A2_Medium | chr19   | 32998511  | 32998911 | Promoter (2-3kb)  | 19      | 32994022  | 32996461 | -2050         | ENSG00000131941 | RHPN2       |
| NR4A2_Medium | chr19   | 34463270  | 34463670 | Promoter (3-4kb)  | 19      | 34467025  | 34469116 | -3355         | ENSG00000126261 | UBA2        |
| NR4A2_Medium | chr19   | 34602740  | 34603140 | Promoter (8-9kb)  | 19      | 34593442  | 34594585 | -8155         | ENSG00000205209 | SCGB2B2     |
| NR4A2_Medium | chr19   | 35045608  | 35046008 | Promoter (3-4kb)  | 19      | 35049271  | 35060081 | -3263         | ENSG00000105707 | HPN         |
| NR4A2_Medium | chr19   | 35271465  | 35271865 | Promoter (<=1kb)  | 19      | 35271083  | 35279813 | 382           | ENSG00000105698 | USF2        |
| NR4A2_Medium | chr19   | 35444021  | 35444421 | Promoter (3-4kb)  | 19      | 35448301  | 35451767 | -3880         | ENSG00000126262 | FFAR2       |
| NR4A2_Medium | chr19   | 35482074  | 35482474 | Promoter (7-8kb)  | 19      | 35487324  | 35490464 | 7990          | ENSG00000188508 | KRTDAP      |
| NR4A2_Medium | chr19   | 35562699  | 35563099 | Promoter (<=1kb)  | 19      | 35560819  | 35563339 | 240           | ENSG00000105675 | ATP4A       |
| NR4A2_Medium | chr19   | 35720183  | 35720583 | Promoter (2-3kb)  | 19      | 35718019  | 35738878 | 2164          | ENSG00000272333 | KMT2B       |
| NR4A2_Medium | chr19   | 36067587  | 36067987 | Promoter (3-4kb)  | 19      | 36071606  | 36075417 | -3619         | ENSG00000075702 | WDR62       |
| NR4A2_Medium | chr19   | 36070969  | 36071369 | Promoter (<=1kb)  | 19      | 36071606  | 36075417 | -237          | ENSG00000075702 | WDR62       |
| NR4A2_Medium | chr19   | 36071717  | 36072117 | Promoter (<=1kb)  | 19      | 36071606  | 36075417 | 111           | ENSG00000075702 | WDR62       |
| NR4A2_Medium | chr19   | 36249859  | 36250259 | Promoter (3-4kb)  | 19      | 36182294  | 36246257 | -3602         | ENSG00000196357 | ZNF565      |
| NR4A2_Medium | chr19   | 36602780  | 36603180 | Promoter (1-2kb)  | 19      | 36604817  | 36627992 | -1637         | ENSG00000161298 | ZNF382      |
| NR4A2_Medium | chr19   | 36714412  | 36714812 | Promoter (1-2kb)  | 19      | 36712482  | 36727701 | 1930          | ENSG00000189042 | ZNF567      |
| NR4A2_Medium | chr19   | 36771176  | 36771576 | Promoter (1-2kb)  | 19      | 36743480  | 36772807 | 1231          | ENSG00000267041 | ZNF850      |
| NR4A2_Medium | chr19   | 36798205  | 36798605 | Promoter (<=1kb)  | 19      | 36797592  | 36813667 | 613           | ENSG00000267254 | ZNF790-AS1  |
| NR4A2_Medium | chr19   | 36844287  | 36844687 | Promoter (5-6kb)  | 19      | 36818322  | 36850267 | 5580          | ENSG00000197863 | ZNF790      |
| NR4A2_Medium | chr19   | 37303461  | 37303995 | Promoter (<=1kb)  | 19      | 37235507  | 37304340 | 345           | NA              | LOC284412   |
| NR4A2_Medium | chr19   | 37375100  | 37375500 | Promoter (3-4kb)  | 19      | 37371194  | 37392894 | 3906          | ENSG00000189164 | ZNF527      |
| NR4A2_Medium | chr19   | 37582950  | 37583350 | Promoter (<=1kb)  | 19      | 37566185  | 37584156 | 806           | ENSG00000180479 | ZNF571      |
| NR4A2_Medium | chr19   | 37693194  | 37693594 | Promoter (<=1kb)  | 19      | 37647813  | 37692337 | -857          | ENSG00000196381 | ZNF781      |
| NR4A2_Medium | chr19   | 37905989  | 37906389 | Promoter (<=1kb)  | 19      | 37884823  | 37906594 | 205           | ENSG00000171804 | WDR87       |
| NR4A2_Medium | chr19   | 38102339  | 38102739 | Promoter (2-3kb)  | 19      | 38099982  | 38110315 | 2357          | ENSG00000105738 | SIPA1L3     |
| NR4A2_Medium | chr19   | 38220217  | 38220617 | Promoter (<=1kb)  | 19      | 38211717  | 38219939 | -278          | ENSG00000011332 | DPF1        |
| NR4A2_Medium | chr19   | 38223623  | 38224023 | Promoter (<=1kb)  | 19      | 38216242  | 38223961 | 0             | ENSG00000011332 | DPF1        |
| NR4A2_Medium | chr19   | 38234015  | 38234415 | Promoter (4-5kb)  | 19      | 38211043  | 38229714 | -4301         | ENSG00000011332 | DPF1        |
| NR4A2_Medium | chr19   | 38312653  | 38313053 | Promoter (2-3kb)  | 19      | 38307428  | 38315736 | 2683          | ENSG00000167645 | YIF1B       |
| NR4A2_Medium | chr19   | 38467884  | 38468284 | Promoter (1-2kb)  | 19      | 38466128  | 38467886 | 1756          | ENSG00000196218 | RYR1        |
| NR4A2_Medium | chr19   | 38530189  | 38530589 | Promoter (2-3kb)  | 19      | 38528090  | 38536062 | 2099          | ENSG00000196218 | RYR1        |
| NR4A2_Medium | chr19   | 39019227  | 39019627 | Promoter (7-8kb)  | 19      | 38990714  | 39026960 | 7333          | ENSG00000161243 | FBXO27      |
| NR4A2_Medium | chr19   | 39288667  | 39289067 | Promoter (7-8kb)  | 19      | 39296407  | 39298673 | -7340         | ENSG00000182393 | IFNL1       |
| NR4A2_Medium | chr19   | 39319338  | 39319738 | Promoter (4-5kb)  | 19      | 39306568  | 39315336 | -4002         | ENSG00000128011 | LRFN1       |
| NR4A2_Medium | chr19   | 39333745  | 39334145 | Promoter (1-2kb)  | 19      | 39328359  | 39335531 | 1386          | ENSG00000130755 | GMFG        |
| NR4A2_Medium | chr19   | 39441932  | 39442332 | Promoter (<=1kb)  | 19      | 39441643  | 39476670 | 289           | ENSG00000196235 | SUPT5H      |
| NR4A2_Medium | chr19   | 40268599  | 40268999 | Promoter (<=1kb)  | 19      | 40255244  | 40269589 | 590           | ENSG00000105221 | AKT2        |
| NR4A2_Medium | chr19   | 40396030  | 40396430 | Promoter (5-6kb)  | 19      | 40379271  | 40390181 | -5849         | ENSG00000160396 | HIPK4       |
| NR4A2_Medium | chr19   | 40411819  | 40412219 | Promoter (1-2kb)  | 19      | 40393768  | 40413364 | 1145          | ENSG00000105227 | PRX         |
| NR4A2_Medium | chr19   | 40433079  | 40433479 | Promoter (7-8kb)  | 19      | 40421589  | 40425992 | -7087         | ENSG00000197019 | SERTAD1     |
| NR4A2_Medium | chr19   | 40690830  | 40691230 | Promoter (<=1kb)  | 19      | 40680987  | 40690972 | 0             | ENSG00000105245 | NUMBL       |
| NR4A2_Medium | chr19   | 40776608  | 40777008 | Promoter (<=1kb)  | 19      | 40776794  | 40777490 | 0             | ENSG00000261857 | MIA         |
| NR4A2_Medium | chr19   | 40785962  | 40786362 | Promoter (<=1kb)  | 19      | 40785533  | 40796938 | 429           | ENSG00000167578 | RAB4B       |
| NR4A2_Medium | chr19   | 40848896  | 40849296 | Promoter (1-2kb)  | 19      | 40844922  | 40850440 | 1144          | ENSG00000255974 | CYP2A6      |
| NR4A2_Medium | chr19   | 40880776  | 40881176 | Promoter (<=1kb)  | 19      | 40877075  | 40880090 | -686          | ENSG00000198077 | CYP2A7      |
| NR4A2_Medium | chr19   | 40917268  | 40917668 | Promoter (6-7kb)  | 19      | 40924219  | 40939517 | -6551         | ENSG00000256612 | CYP2B7P     |
| NR4A2_Medium | chr19   | 41185333  | 41185733 | Promoter (7-8kb)  | 19      | 41193210  | 41205975 | -7477         | ENSG00000167600 | CYP2S1      |
| NR4A2_Medium | chr19   | 41230350  | 41230750 | Promoter (3-4kb)  | 19      | 41226755  | 41260204 | 3595          | ENSG00000167601 | AXL         |
| NR4A2_Medium | chr19   | 41438663  | 41439063 | Promoter (<=1kb)  | 19      | 41431319  | 41439537 | 474           | ENSG00000105341 | DMAC2       |
| NR4A2_Medium | chr19   | 41718235  | 41718635 | Promoter (8-9kb)  | 19      | 41709914  | 41717630 | 8321          | ENSG00000105388 | CEACAM5     |
| NR4A2_Medium | chr19   | 41741666  | 41742066 | Promoter (8-9kb)  | 19      | 41750977  | 41756635 | -8911         | ENSG00000086548 | CEACAM6     |
| NR4A2_Medium | chr19   | 41870576  | 41870976 | Promoter (<=1kb)  | 19      | 41869627  | 41869698 | 949           | ENSG00000276926 | MIR6797     |
| NR4A2_Medium | chr19   | 41880020  | 41880420 | Promoter (2-3kb)  | 19      | 41877305  | 41880980 | 2715          | ENSG00000105369 | CD79A       |
| NR4A2_Medium | chr19   | 41990975  | 41991375 | Promoter (<=1kb)  | 19      | 41988508  | 41990951 | -24           | ENSG00000105409 | ATP1A3      |
| NR4A2_Medium | chr19   | 42441903  | 42442303 | Promoter (<=1kb)  | 19      | 42428533  | 42442852 | 549           | ENSG00000189377 | CXCL17      |
| NR4A2_Medium | chr19   | 43414723  | 43415123 | Promoter (<=1kb)  | 19      | 43414888  | 43418597 | 0             | ENSG00000131126 | TEX101      |
| NR4A2_Medium | chr19   | 43532413  | 43532813 | Promoter (<=1kb)  | 19      | 43532964  | 43535252 | -151          | ENSG00000176472 | ZNF575      |
| NR4A2_Medium | chr19   | 43659253  | 43659653 | Promoter (1-2kb)  | 19      | 43656566  | 43661548 | 1895          | ENSG00000011422 | PLAUR       |
| NR4A2_Medium | chr19   | 43708314  | 43708714 | Promoter (7-8kb)  | 19      | 43716076  | 43720021 | -7362         | ENSG00000124449 | IRGC        |
| NR4A2_Medium | chr19   | 43719797  | 43720197 | Promoter (3-4kb)  | 19      | 43716110  | 43719272 | 3687          | ENSG00000124449 | IRGC        |
| NR4A2_Medium | chr19   | 43798948  | 43799348 | Promoter (<=1kb)  | 19      | 43797682  | 43799067 | 0             | ENSG00000159871 | LYPD5       |
| NR4A2_Medium | chr19   | 44684173  | 44684573 | Promoter (6-7kb)  | 19      | 44677585  | 44684359 | 6588          | ENSG00000186567 | CEACAM19    |
| NR4A2_Medium | chr19   | 44740931  | 44741331 | Promoter (6-7kb)  | 19      | 44747705  | 44759486 | -6374         | ENSG00000069399 | BCL3        |
| NR4A2_Medium | chr19   | 44910326  | 44910726 | Promoter (3-4kb)  | 19      | 44914247  | 44919342 | -3521         | ENSG00000130208 | APOC1       |
| NR4A2_Medium | chr19   | 44916564  | 44916964 | Promoter (1-2kb)  | 19      | 44914869  | 44919349 | 1695          | ENSG00000130208 | APOC1       |
| NR4A2_Medium | chr19   | 44945717  | 44946117 | Promoter (<=1kb)  | 19      | 44945971  | 44949566 | 0             | NA              | APOC4-APOC2 |
| NR4A2_Medium | chr19   | 45029336  | 45029736 | Promoter (2-3kb)  | 19      | 45032424  | 45037568 | -2688         | ENSG00000104856 | RELB        |
| NR4A2_Medium | chr19   | 45070920  | 45071320 | Promoter (1-2kb)  | 19      | 45069839  | 45070956 | 1081          | ENSG00000104859 | CLASRP      |
| NR4A2_Medium | chr19   | 45096819  | 45097219 | Promoter (2-3kb)  | 19      | 45100064  | 45141386 | -2845         | ENSG00000104866 | PPP1R37     |
| NR4A2_Medium | chr19   | 45382815  | 45383215 | Promoter (<=1kb)  | 19      | 45379638  | 45382592 | -223          | ENSG00000104881 | PPP1R13L    |
| NR4A2_Medium | chr19   | 45827684  | 45828084 | Promoter (3-4kb)  | 19      | 45815410  | 45824161 | -3523         | ENSG00000125755 | SYMPK       |
| NR4A2_Medium | chr19   | 45867152  | 45867552 | Promoter (2-3kb)  | 19      | 45864326  | 45873797 | 2826          | ENSG00000170608 | FOXA3       |
| NR4A2_Medium | chr19   | 45923716  | 45924116 | Promoter (8-9kb)  | 19      | 45913214  | 45914778 | -8938         | ENSG00000188425 | NANOS2      |
| NR4A2_Medium | chr19   | 45954624  | 45955024 | Promoter (7-8kb)  | 19      | 45940894  | 45962606 | 7582          | ENSG00000104967 | NOVA2       |
| NR4A2_Medium | chr19   | 46119044  | 46119444 | Promoter (5-6kb)  | 19      | 46120067  | 46124688 | 5244          | ENSG00000188624 | IGFL3       |
| NR4A2_Medium | chr19   | 46307987  | 46308387 | Promoter (<=1kb)  | 19      | 46309221  | 46312653 | -834          | ENSG00000124440 | HIF3A       |
| NR4A2_Medium | chr19   | 46372991  | 46373391 | Promoter (2-3kb)  | 19      | 46375604  | 46376703 | -2213         | ENSG00000011485 | PPP5C       |
| NR4A2_Medium | chr19   | 46393059  | 46393459 | Promoter (5-6kb)  | 19      | 46387926  | 46390610 | 5133          | ENSG00000011485 | PPP5C       |
| NR4A2_Medium | chr19   | 46405991  | 46406391 | Promoter (7-8kb)  | 19      | 46410329  | 46413564 | 7173          | ENSG00000169515 | CCDC8       |
| NR4A2_Medium | chr19   | 46651308  | 46651708 | Promoter (2-3kb)  | 19      | 46647612  | 46654657 | 2949          | ENSG00000197380 | DACT3       |
| NR4A2_Medium | chr19   | 46708577  | 46708977 | Promoter (<=1kb)  | 19      | 46709293  | 46709345 | 368           | NA              | MIR320E     |
| NR4A2_Medium | chr19   | 46837517  | 46837917 | Promoter (<=1kb)  | 19      | 46838172  | 46838820 | 903           | ENSG00000042753 | AP2S1       |
| NR4A2_Medium | chr19   | 46844573  | 46844973 | Promoter (1-2kb)  | 19      | 46838172  | 46846148 | 1175          | ENSG00000042753 | AP2S1       |
| NR4A2_Medium | chr19   | 47119773  | 47120173 | Promoter (5-6kb)  | 19      | 47064187  | 47113776 | -5997         | ENSG00000130749 | ZC3H4       |
| NR4A2_Medium | chr19   | 47271417  | 47271817 | Promoter (3-4kb)  | 19      | 47274885  | 47275723 | -3068         | ENSG00000257704 | INAFM1      |
| NR4A2_Medium | chr19   | 47422594  | 47422994 | Promoter (3-4kb)  | 19      | 47403124  | 47419527 | -3067         | ENSG00000105419 | MEIS3       |
| NR4A2_Medium | chr19   | 47470894  | 47471294 | Promoter (<=1kb)  | 19      | 47429740  | 47471863 | 569           | ENSG00000118160 | SLC8A2      |
| NR4A2_Medium | chr19   | 47490140  | 47490540 | Promoter (<=1kb)  | 19      | 47487662  | 47491475 | 935           | ENSG00000105402 | NAPA        |
| NR4A2_Medium | chr19   | 47672220  | 47672620 | Promoter (6-7kb)  | 19      | 47678962  | 47703222 | -6342         | ENSG00000063169 | BICRA       |
| NR4A2_Medium | chr1    |           |          |                   |         |           |          |               |                 |             |



| Condition    | peakChr | peakStart | peakEnd  | annotation        | geneChr | geneStart | geneEnd  | distanceToTSS | geneID          | geneSymbol   |
|--------------|---------|-----------|----------|-------------------|---------|-----------|----------|---------------|-----------------|--------------|
| NR4A2_Medium | chr19   | 48797434  | 48797834 | Promoter (<=1kb)  | 19      | 48796247  | 48797543 | 0             | ENSG00000105552 | BCAT2        |
| NR4A2_Medium | chr19   | 48813718  | 48814118 | Promoter (<=1kb)  | 19      | 48813018  | 48815072 | 954           | ENSG00000087076 | HSD17B14     |
| NR4A2_Medium | chr19   | 49056481  | 49056881 | Promoter (<=1kb)  | 19      | 49054275  | 49055779 | -702          | ENSG00000196337 | CGB7         |
| NR4A2_Medium | chr19   | 49061738  | 49062138 | Promoter (2-3kb)  | 19      | 49054275  | 49058860 | -2878         | ENSG00000196337 | CGB7         |
| NR4A2_Medium | chr19   | 49140581  | 49140981 | Promoter (2-3kb)  | 19      | 49142984  | 49151026 | -2003         | ENSG00000177380 | PPFIA3       |
| NR4A2_Medium | chr19   | 49166852  | 49167252 | Promoter (<=1kb)  | 19      | 49167644  | 49168337 | -392          | ENSG00000130529 | TRPM4        |
| NR4A2_Medium | chr19   | 49181919  | 49182319 | Promoter (<=1kb)  | 19      | 49182526  | 49211836 | -207          | ENSG00000130529 | TRPM4        |
| NR4A2_Medium | chr19   | 49218147  | 49218547 | Promoter (7-8kb)  | 19      | 49210734  | 49211834 | 7413          | ENSG00000130529 | TRPM4        |
| NR4A2_Medium | chr19   | 49409544  | 49409944 | Promoter (1-2kb)  | 19      | 49408273  | 49409862 | 1271          | ENSG00000161609 | KASH5        |
| NR4A2_Medium | chr19   | 49514487  | 49514887 | Promoter (<=1kb)  | 19      | 49514058  | 49526333 | 429           | ENSG00000104870 | FCGRT        |
| NR4A2_Medium | chr19   | 49532669  | 49533069 | Promoter (4-5kb)  | 19      | 49528626  | 49546962 | 4043          | ENSG00000142552 | RCN3         |
| NR4A2_Medium | chr19   | 49621187  | 49621587 | Promoter (<=1kb)  | 19      | 49620449  | 49621760 | 738           | ENSG00000126464 | PRR12        |
| NR4A2_Medium | chr19   | 49791808  | 49792208 | Promoter (<=1kb)  | 19      | 49791866  | 49791934 | 0             | ENSG00000276270 | MIR6799      |
| NR4A2_Medium | chr19   | 49825504  | 49825904 | Promoter (4-5kb)  | 19      | 49830843  | 49832415 | -4939         | ENSG00000104973 | MED25        |
| NR4A2_Medium | chr19   | 50076206  | 50076606 | Promoter (1-2kb)  | 19      | 50075123  | 50075902 | 1083          | ENSG00000204666 | LOC400710    |
| NR4A2_Medium | chr19   | 50290524  | 50290924 | Promoter (5-6kb)  | 19      | 50284764  | 50310539 | 5760          | ENSG00000105357 | MYH14        |
| NR4A2_Medium | chr19   | 50292297  | 50292697 | Promoter (7-8kb)  | 19      | 50284764  | 50310539 | 7533          | ENSG00000105357 | MYH14        |
| NR4A2_Medium | chr19   | 50364392  | 50364792 | Promoter (<=1kb)  | 19      | 50359606  | 50365625 | 833           | ENSG00000131400 | NAPSA        |
| NR4A2_Medium | chr19   | 50497712  | 50498112 | Promoter (9-10kb) | 19      | 50506446  | 50508029 | 9917          | ENSG00000161677 | JOSD2        |
| NR4A2_Medium | chr19   | 50499604  | 50500189 | Promoter (7-8kb)  | 19      | 50506446  | 50508029 | 7840          | ENSG00000161677 | JOSD2        |
| NR4A2_Medium | chr19   | 50571855  | 50572255 | Promoter (3-4kb)  | 19      | 50516892  | 50568435 | -3420         | ENSG00000131409 | LRR4C4B      |
| NR4A2_Medium | chr19   | 50616240  | 50616640 | Promoter (9-10kb) | 19      | 50622420  | 50626134 | 9494          | ENSG00000213023 | SYT3         |
| NR4A2_Medium | chr19   | 50626192  | 50626592 | Promoter (<=1kb)  | 19      | 50622420  | 50626134 | -58           | ENSG00000213023 | SYT3         |
| NR4A2_Medium | chr19   | 50638262  | 50638662 | Promoter (<=1kb)  | 19      | 50621977  | 50638045 | -217          | ENSG00000213023 | SYT3         |
| NR4A2_Medium | chr19   | 50645115  | 50645515 | Promoter (3-4kb)  | 19      | 50649445  | 50659306 | -3930         | ENSG00000235034 | C19orf81     |
| NR4A2_Medium | chr19   | 50810172  | 50810572 | Promoter (1-2kb)  | 19      | 50808874  | 50818880 | 1298          | ENSG00000180279 | LINC01869    |
| NR4A2_Medium | chr19   | 50846383  | 50846783 | Promoter (8-9kb)  | 19      | 50854915  | 50858540 | -8132         | ENSG00000142515 | KLK3         |
| NR4A2_Medium | chr19   | 50858176  | 50858576 | Promoter (<=1kb)  | 19      | 50857391  | 50860130 | 785           | ENSG00000142515 | KLK3         |
| NR4A2_Medium | chr19   | 50911686  | 50912086 | Promoter (<=1kb)  | 19      | 50906934  | 50910738 | -948          | ENSG00000167749 | KLK4         |
| NR4A2_Medium | chr19   | 50944267  | 50944667 | Promoter (8-9kb)  | 19      | 50943308  | 50952668 | 8001          | ENSG00000167754 | KLK5         |
| NR4A2_Medium | chr19   | 50980937  | 50981438 | Promoter (2-3kb)  | 19      | 50976488  | 50983815 | 2377          | ENSG00000169035 | KLK7         |
| NR4A2_Medium | chr19   | 50982349  | 50982749 | Promoter (1-2kb)  | 19      | 50976488  | 50983815 | 1066          | ENSG00000169035 | KLK7         |
| NR4A2_Medium | chr19   | 51023651  | 51024051 | Promoter (<=1kb)  | 19      | 51022236  | 51024211 | 160           | ENSG00000167757 | KLK11        |
| NR4A2_Medium | chr19   | 51086335  | 51086735 | Promoter (2-3kb)  | 19      | 51077897  | 51084245 | -2090         | ENSG00000129437 | KLK14        |
| NR4A2_Medium | chr19   | 51247079  | 51247479 | Promoter (<=1kb)  | 19      | 51246348  | 51267383 | 731           | ENSG00000179213 | SIGLECL1     |
| NR4A2_Medium | chr19   | 51357254  | 51357654 | Promoter (<=1kb)  | 19      | 51345169  | 51357106 | -148          | ENSG00000105379 | ETFB         |
| NR4A2_Medium | chr19   | 51358334  | 51358734 | Promoter (1-2kb)  | 19      | 51345169  | 51357106 | -1228         | ENSG00000105379 | ETFB         |
| NR4A2_Medium | chr19   | 51391734  | 51392134 | Promoter (1-2kb)  | 19      | 51388289  | 51390591 | -1143         | ENSG00000262874 | C19orf84     |
| NR4A2_Medium | chr19   | 51488501  | 51488901 | Promoter (9-10kb) | 19      | 51478622  | 51490952 | 9879          | ENSG00000213822 | CEACAM18     |
| NR4A2_Medium | chr19   | 51693978  | 51694378 | Promoter (<=1kb)  | 19      | 51694210  | 51701770 | 0             | ENSG00000182310 | SPACA6       |
| NR4A2_Medium | chr19   | 51875045  | 51875445 | Promoter (3-4kb)  | 19      | 51855804  | 51871847 | -3198         | ENSG00000161551 | ZNF577       |
| NR4A2_Medium | chr19   | 52087062  | 52087462 | Promoter (2-3kb)  | 19      | 52064466  | 52084888 | -2174         | ENSG00000197608 | ZNF841       |
| NR4A2_Medium | chr19   | 52101487  | 52101887 | Promoter (5-6kb)  | 19      | 52064466  | 52095765 | -5722         | ENSG00000197608 | ZNF841       |
| NR4A2_Medium | chr19   | 52214003  | 52214403 | Promoter (1-2kb)  | 19      | 52212830  | 52219734 | 1173          | ENSG00000105568 | PPP2R1A      |
| NR4A2_Medium | chr19   | 52231541  | 52231941 | Promoter (9-10kb) | 19      | 52222020  | 52222098 | 9521          | ENSG00000274380 | MIR6801      |
| NR4A2_Medium | chr19   | 52376137  | 52376537 | Promoter (6-7kb)  | 19      | 52370093  | 52373151 | 6044          | ENSG00000221923 | ZNF880       |
| NR4A2_Medium | chr19   | 52719465  | 52719865 | Promoter (8-9kb)  | 19      | 52704732  | 52728786 | 8921          | ENSG00000213020 | ZNF611       |
| NR4A2_Medium | chr19   | 52993392  | 52993792 | Promoter (<=1kb)  | 19      | 52968251  | 52993524 | 0             | ENSG00000242779 | ZNF702P      |
| NR4A2_Medium | chr19   | 53196834  | 53197234 | Promoter (3-4kb)  | 19      | 53179568  | 53193386 | -3448         | ENSG00000197497 | ZNF665       |
| NR4A2_Medium | chr19   | 53279218  | 53279618 | Promoter (2-3kb)  | 19      | 53282290  | 53284349 | -2672         | ENSG00000189348 | FAM90A27P    |
| NR4A2_Medium | chr19   | 53387312  | 53387712 | Promoter (2-3kb)  | 19      | 53389793  | 53423097 | -2081         | ENSG00000196417 | ZNF765       |
| NR4A2_Medium | chr19   | 53515431  | 53515831 | Promoter (3-4kb)  | 19      | 53519527  | 53532808 | -3696         | ENSG00000130844 | ZNF331       |
| NR4A2_Medium | chr19   | 53529196  | 53529596 | Promoter (6-7kb)  | 19      | 53536323  | 53580269 | -6727         | ENSG00000130844 | ZNF331       |
| NR4A2_Medium | chr19   | 53627129  | 53627529 | Promoter (4-5kb)  | 19      | 53632056  | 53637009 | -4527         | ENSG00000204595 | DPRX         |
| NR4A2_Medium | chr19   | 53757601  | 53758001 | Promoter (<=1kb)  | 19      | 53758232  | 53758318 | -231          | ENSG00000221548 | MIR1283-2    |
| NR4A2_Medium | chr19   | 53788701  | 53789101 | Promoter (<=1kb)  | 19      | 53788705  | 53788773 | 0             | ENSG00000199143 | MIR373       |
| NR4A2_Medium | chr19   | 53794402  | 53794802 | Promoter (5-6kb)  | 19      | 53788705  | 53788773 | 5697          | ENSG00000199143 | MIR373       |
| NR4A2_Medium | chr19   | 53961221  | 53961621 | Promoter (1-2kb)  | 19      | 53963040  | 53990215 | -1419         | ENSG00000142408 | CACNG8       |
| NR4A2_Medium | chr19   | 55199784  | 55200184 | Promoter (7-8kb)  | 19      | 55205392  | 55207239 | 7055          | ENSG00000080031 | PTPRH        |
| NR4A2_Medium | chr19   | 55292589  | 55292989 | Promoter (8-9kb)  | 19      | 55284421  | 55302921 | 8168          | ENSG00000160469 | BRSK1        |
| NR4A2_Medium | chr19   | 55448688  | 55449088 | Promoter (5-6kb)  | 19      | 55428740  | 55442863 | -5825         | ENSG00000187902 | SHISA7       |
| NR4A2_Medium | chr19   | 55542257  | 55542657 | Promoter (2-3kb)  | 19      | 55544248  | 55545522 | 2759          | ENSG00000231274 | SBK3         |
| NR4A2_Medium | chr19   | 55622464  | 55622864 | Promoter (1-2kb)  | 19      | 55621296  | 55624566 | 1702          | ENSG00000179922 | ZNF784       |
| NR4A2_Medium | chr19   | 55661436  | 55661836 | Promoter (<=1kb)  | 19      | 55662409  | 55674239 | -663          | ENSG00000063244 | U2AF2        |
| NR4A2_Medium | chr19   | 55750818  | 55751218 | Promoter (7-8kb)  | 19      | 55759014  | 55763175 | -7796         | ENSG00000223638 | RFPL4A       |
| NR4A2_Medium | chr19   | 55945370  | 55945770 | Promoter (2-3kb)  | 19      | 55947832  | 55988629 | -2062         | ENSG00000179709 | NLRP8        |
| NR4A2_Medium | chr19   | 56009149  | 56009549 | Promoter (5-6kb)  | 19      | 56003735  | 56020423 | 5414          | ENSG00000171487 | NLRP5        |
| NR4A2_Medium | chr19   | 56056416  | 56056816 | Promoter (9-10kb) | 19      | 56066684  | 56078801 | -9868         | ENSG00000267522 | LINC01864    |
| NR4A2_Medium | chr19   | 56098724  | 56099124 | Promoter (4-5kb)  | 19      | 56089053  | 56103484 | 4360          | ENSG00000142409 | ZNF787       |
| NR4A2_Medium | chr19   | 56158866  | 56159266 | Promoter (1-2kb)  | 19      | 56157309  | 56159967 | 1557          | ENSG00000167685 | ZNF444       |
| NR4A2_Medium | chr19   | 56169338  | 56169738 | Promoter (6-7kb)  | 19      | 56176008  | 56185775 | -6270         | ENSG00000197487 | GALP         |
| NR4A2_Medium | chr19   | 56220116  | 56220516 | Promoter (7-8kb)  | 19      | 56219670  | 56228290 | 7774          | ENSG00000131848 | ZSCAN5A      |
| NR4A2_Medium | chr19   | 56287594  | 56287994 | Promoter (3-4kb)  | 19      | 56284181  | 56310450 | 3413          | ENSG00000267710 | EDDM13       |
| NR4A2_Medium | chr19   | 56296134  | 56296534 | Promoter (<=1kb)  | 19      | 56295828  | 56297869 | 306           | ENSG00000267710 | EDDM13       |
| NR4A2_Medium | chr19   | 56467465  | 56467865 | Promoter (5-6kb)  | 19      | 56439325  | 56473068 | 5203          | ENSG00000198046 | ZNF667       |
| NR4A2_Medium | chr19   | 57116363  | 57116763 | Promoter (2-3kb)  | 19      | 57119138  | 57128767 | -2375         | ENSG00000131864 | USP29        |
| NR4A2_Medium | chr19   | 57324044  | 57324444 | Promoter (3-4kb)  | 19      | 57320472  | 57330770 | 3572          | ENSG00000178229 | ZNF543       |
| NR4A2_Medium | chr19   | 57548978  | 57549378 | Promoter (<=1kb)  | 19      | 57542636  | 57547993 | -985          | ENSG00000251369 | ZNF550       |
| NR4A2_Medium | chr19   | 57669124  | 57669524 | Promoter (<=1kb)  | 19      | 57668935  | 57679152 | 189           | ENSG00000180532 | ZSCAN4       |
| NR4A2_Medium | chr19   | 57701328  | 57701728 | Promoter (7-8kb)  | 19      | 57697367  | 57709168 | 7440          | ENSG00000179909 | ZNF154       |
| NR4A2_Medium | chr19   | 57806885  | 57807285 | Promoter (6-7kb)  | 19      | 57803841  | 57813404 | 6119          | ENSG00000178935 | ZNF552       |
| NR4A2_Medium | chr19   | 58079699  | 58080099 | Promoter (7-8kb)  | 19      | 58086174  | 58087377 | 7278          | ENSG00000121413 | ZSCAN18      |
| NR4A2_Medium | chr19   | 58116185  | 58116585 | Promoter (1-2kb)  | 19      | 58108802  | 58118366 | 1781          | ENSG00000121413 | ZSCAN18      |
| NR4A2_Medium | chr19   | 58196202  | 58196602 | Promoter (9-10kb) | 19      | 58186947  | 58202468 | 9255          | ENSG00000171606 | ZNF274       |
| NR4A2_Medium | chr19   | 58343254  | 58343654 | Promoter (3-4kb)  | 19      | 58345178  | 58347634 | 3980          | ENSG00000121410 | A1BG         |
| NR4A2_Medium | chr19   | 58384451  | 58384851 | Promoter (1-2kb)  | 19      | 58386400  | 58394806 | -1549         | ENSG00000083845 | RPS5         |
| NR4A2_Medium | chr19   | 58391081  | 58391481 | Promoter (1-2kb)  | 19      | 58393056  | 58394802 | -1575         | NA              | MIR10394     |
| NR4A2_Medium | chr20   | 354214    | 354614   | Promoter (4-5kb)  | 20      | 349726    | 354848   | 4488          | ENSG00000125841 | NRSN2        |
| NR4A2_Medium | chr20   | 360922    | 361322   | Promoter (1-2kb)  | 20      | 362835    | 391386   | -1513         | ENSG00000101255 | TRIB3        |
| NR4A2_Medium | chr20   | 452990    | 453390   | Promoter (9-10kb) | 20      | 435480    | 462531   | 9141          | ENSG00000125875 | TBC1D20      |
| NR4A2_Medium | chr20   | 453951    | 454351   | Promoter (8-9kb)  | 20      | 435480    | 462531   | 8180          | ENSG00000125875 | TBC1D20      |
| NR4A2_Medium | chr20   | 1182607   | 1183007  | Promoter (1-2kb)  | 20      | 1180561   | 1184473  | 1466          | ENSG00000125895 | TMEM74B      |
| NR4A2_Medium | chr20   | 1295476   | 1295876  | Promoter (<=1kb)  | 20      | 1295774   | 1309325  | 0             | ENSG00000101298 | SNPH         |
| NR4A2_Medium | chr20   | 1779580   | 1779980  | Promoter (<=1kb)  | 20      | 1773365   | 1779746  | 0             | ENSG00000232528 | LOC100289473 |
| NR4A2_Medium | chr     |           |          |                   |         |           |          |               |                 |              |

| Condition    | peakChr | peakStart | peakEnd  | annotation        | geneChr | geneStart | geneEnd  | distanceToTSS | geneID          | geneSymbol   |
|--------------|---------|-----------|----------|-------------------|---------|-----------|----------|---------------|-----------------|--------------|
| NR4A2_Medium | chr20   | 7361877   | 7362277  | Promoter (9-10kb) | 20      | 7371608   | 7371692  | -9331         | ENSG00000278159 | MIR8062      |
| NR4A2_Medium | chr20   | 8135049   | 8135449  | Promoter (2-3kb)  | 20      | 8132649   | 8802493  | 2400          | ENSG00000182621 | PLCB1        |
| NR4A2_Medium | chr20   | 10294323  | 10294723 | Promoter (1-2kb)  | 20      | 10296230  | 10307418 | -1507         | ENSG00000132639 | SNAP25       |
| NR4A2_Medium | chr20   | 10606303  | 10606703 | Promoter (7-8kb)  | 20      | 10598675  | 10636829 | 7628          | ENSG00000149346 | SLX4IP       |
| NR4A2_Medium | chr20   | 10654283  | 10654683 | Promoter (1-2kb)  | 20      | 10641580  | 10652722 | -1561         | ENSG00000101384 | JAG1         |
| NR4A2_Medium | chr20   | 12953697  | 12954097 | Promoter (1-2kb)  | 20      | 12865202  | 12952519 | -1178         | ENSG00000233048 | LINC01722    |
| NR4A2_Medium | chr20   | 13220241  | 13220641 | Promoter (<=1kb)  | 20      | 13221274  | 13300651 | -633          | ENSG00000101230 | ISM1         |
| NR4A2_Medium | chr20   | 13240419  | 13240819 | Promoter (<=1kb)  | 20      | 13237801  | 13239674 | -745          | NA              | ISM1-AS1     |
| NR4A2_Medium | chr20   | 17514876  | 17515276 | Promoter (<=1kb)  | 20      | 17506828  | 17514741 | -135          | ENSG00000125864 | BFSP1        |
| NR4A2_Medium | chr20   | 17649184  | 17649584 | Promoter (6-7kb)  | 20      | 17641445  | 17643085 | -6099         | ENSG00000125844 | RRBP1        |
| NR4A2_Medium | chr20   | 18580529  | 18580929 | Promoter (6-7kb)  | 20      | 18587893  | 18763917 | -6964         | ENSG00000125821 | DTD1         |
| NR4A2_Medium | chr20   | 18836293  | 18836693 | Promoter (6-7kb)  | 20      | 18809728  | 18830153 | -6140         | NA              | SCP2D1-AS1   |
| NR4A2_Medium | chr20   | 23095668  | 23096068 | Promoter (9-10kb) | 20      | 23079360  | 23086324 | -9344         | ENSG00000125810 | CD93         |
| NR4A2_Medium | chr20   | 23875808  | 23876208 | Promoter (3-4kb)  | 20      | 23875934  | 23879748 | 3540          | ENSG00000170367 | CST5         |
| NR4A2_Medium | chr20   | 23980040  | 23980440 | Promoter (6-7kb)  | 20      | 23985050  | 23986795 | 6355          | ENSG00000149435 | GGTLC1       |
| NR4A2_Medium | chr20   | 23982007  | 23982407 | Promoter (4-5kb)  | 20      | 23985050  | 23986795 | 4388          | ENSG00000149435 | GGTLC1       |
| NR4A2_Medium | chr20   | 24942848  | 24943248 | Promoter (6-7kb)  | 20      | 24949269  | 24959928 | -6021         | ENSG00000077984 | CST7         |
| NR4A2_Medium | chr20   | 25022846  | 25023246 | Promoter (9-10kb) | 20      | 25006230  | 25032706 | 9460          | ENSG00000154930 | ACSS1        |
| NR4A2_Medium | chr20   | 25298619  | 25299019 | Promoter (4-5kb)  | 20      | 25293901  | 25296636 | 4718          | ENSG00000100994 | PYGB         |
| NR4A2_Medium | chr20   | 25325825  | 25326225 | Promoter (5-6kb)  | 20      | 25303578  | 25319825 | -6000         | ENSG00000100997 | ABHD12       |
| NR4A2_Medium | chr20   | 25468278  | 25468678 | Promoter (5-6kb)  | 20      | 25455673  | 25462742 | -5536         | ENSG00000101004 | NINL         |
| NR4A2_Medium | chr20   | 25867691  | 25868091 | Promoter (<=1kb)  | 20      | 25774222  | 25868132 | 41            | NA              | LOC101926935 |
| NR4A2_Medium | chr20   | 25986548  | 25986948 | Promoter (1-2kb)  | 20      | 25985210  | 26082964 | 1338          | ENSG00000125804 | FAM182A      |
| NR4A2_Medium | chr20   | 25987597  | 25987997 | Promoter (2-3kb)  | 20      | 25985210  | 26082964 | 2387          | ENSG00000125804 | FAM182A      |
| NR4A2_Medium | chr20   | 26058634  | 26059034 | Promoter (<=1kb)  | 20      | 26059639  | 26082959 | -605          | ENSG00000125804 | FAM182A      |
| NR4A2_Medium | chr20   | 26074050  | 26074452 | Promoter (1-2kb)  | 20      | 26072673  | 26082955 | 1377          | ENSG00000125804 | FAM182A      |
| NR4A2_Medium | chr20   | 30283707  | 30284107 | Promoter (5-6kb)  | 20      | 30278906  | 30289205 | 5098          | NA              | LINC01597    |
| NR4A2_Medium | chr20   | 31485702  | 31486102 | Promoter (<=1kb)  | 20      | 31485778  | 31487574 | 0             | ENSG00000233354 | LINC00028    |
| NR4A2_Medium | chr20   | 31558674  | 31559074 | Promoter (<=1kb)  | 20      | 31559616  | 31577923 | -542          | ENSG00000101294 | HM13         |
| NR4A2_Medium | chr20   | 31873201  | 31873601 | Promoter (2-3kb)  | 20      | 31871127  | 31944962 | 2074          | ENSG00000131044 | TTL9         |
| NR4A2_Medium | chr20   | 31973403  | 31973803 | Promoter (5-6kb)  | 20      | 31968151  | 32003387 | 5252          | ENSG00000260903 | XKR7         |
| NR4A2_Medium | chr20   | 32112166  | 32112566 | Promoter (2-3kb)  | 20      | 32109767  | 32141606 | 2399          | ENSG00000101337 | TM9SF4       |
| NR4A2_Medium | chr20   | 32528372  | 32528772 | Promoter (6-7kb)  | 20      | 32527765  | 32535598 | 6826          | ENSG00000197183 | NOL4L        |
| NR4A2_Medium | chr20   | 32567757  | 32568157 | Promoter (2-3kb)  | 20      | 32564992  | 32608890 | 2765          | ENSG00000204393 | NOL4L-DT     |
| NR4A2_Medium | chr20   | 32653476  | 32653876 | Promoter (1-2kb)  | 20      | 32650390  | 32651759 | -1717         | ENSG00000198547 | C20orf203    |
| NR4A2_Medium | chr20   | 32767892  | 32768292 | Promoter (5-6kb)  | 20      | 32762642  | 32808069 | 5250          | ENSG00000088305 | DNMT3B       |
| NR4A2_Medium | chr20   | 33288415  | 33288815 | Promoter (5-6kb)  | 20      | 33283214  | 33309871 | 5201          | ENSG00000125999 | BPIFB1       |
| NR4A2_Medium | chr20   | 33295614  | 33296014 | Promoter (2-3kb)  | 20      | 33298713  | 33307966 | -2699         | ENSG00000125999 | BPIFB1       |
| NR4A2_Medium | chr20   | 33792605  | 33793005 | Promoter (<=1kb)  | 20      | 33787373  | 33793027 | 22            | ENSG00000230753 | ZNF341-AS1   |
| NR4A2_Medium | chr20   | 33821121  | 33821521 | Promoter (9-10kb) | 20      | 33811348  | 33854366 | 9773          | ENSG00000101421 | CHMP4B       |
| NR4A2_Medium | chr20   | 34044433  | 34044833 | Promoter (4-5kb)  | 20      | 34049119  | 34049190 | -4286         | ENSG00000264616 | MIR4755      |
| NR4A2_Medium | chr20   | 34077065  | 34077465 | Promoter (<=1kb)  | 20      | 34077213  | 34108308 | 0             | ENSG00000125970 | RALY         |
| NR4A2_Medium | chr20   | 34257664  | 34258064 | Promoter (2-3kb)  | 20      | 34260365  | 34269344 | -2301         | ENSG00000101440 | ASIP         |
| NR4A2_Medium | chr20   | 34463708  | 34464108 | Promoter (2-3kb)  | 20      | 34466325  | 34466418 | -2217         | ENSG00000207997 | MIR644A      |
| NR4A2_Medium | chr20   | 34561218  | 34561618 | Promoter (2-3kb)  | 20      | 34558775  | 34560345 | 2443          | ENSG00000101460 | MAP1LC3A     |
| NR4A2_Medium | chr20   | 34619131  | 34619531 | Promoter (3-4kb)  | 20      | 34560903  | 34616093 | -3038         | ENSG00000101464 | PIGU         |
| NR4A2_Medium | chr20   | 34858346  | 34858746 | Promoter (5-6kb)  | 20      | 34845013  | 34852481 | -5865         | ENSG00000131067 | GGT7         |
| NR4A2_Medium | chr20   | 34919321  | 34919721 | Promoter (<=1kb)  | 20      | 34920532  | 34926276 | -811          | ENSG00000131069 | ACSS2        |
| NR4A2_Medium | chr20   | 35281467  | 35281867 | Promoter (1-2kb)  | 20      | 35267885  | 35280043 | -1424         | ENSG00000242372 | EIF6         |
| NR4A2_Medium | chr20   | 35314302  | 35314702 | Promoter (<=1kb)  | 20      | 35303971  | 35315436 | 734           | ENSG00000101019 | UQCC1        |
| NR4A2_Medium | chr20   | 35396981  | 35397381 | Promoter (2-3kb)  | 20      | 35303453  | 35394203 | -2778         | ENSG00000101019 | UQCC1        |
| NR4A2_Medium | chr20   | 35415704  | 35416104 | Promoter (3-4kb)  | 20      | 35302566  | 35412031 | -3673         | ENSG00000101019 | UQCC1        |
| NR4A2_Medium | chr20   | 35467605  | 35468005 | Promoter (1-2kb)  | 20      | 35465764  | 35467316 | 1841          | ENSG00000126001 | CEP250       |
| NR4A2_Medium | chr20   | 35515872  | 35516272 | Promoter (5-6kb)  | 20      | 35509998  | 35517531 | 5874          | ENSG00000126001 | CEP250       |
| NR4A2_Medium | chr20   | 35850024  | 35850424 | Promoter (<=1kb)  | 20      | 35849389  | 35863376 | 635           | ENSG0000025293  | PHF20        |
| NR4A2_Medium | chr20   | 35865874  | 35866274 | Promoter (3-4kb)  | 20      | 35869530  | 35871893 | -3256         | ENSG0000025293  | PHF20        |
| NR4A2_Medium | chr20   | 35870793  | 35871193 | Promoter (1-2kb)  | 20      | 35869530  | 35871893 | 1263          | ENSG0000025293  | PHF20        |
| NR4A2_Medium | chr20   | 35966863  | 35967263 | Promoter (1-2kb)  | 20      | 35968590  | 36030700 | -1327         | ENSG00000149646 | CNBD2        |
| NR4A2_Medium | chr20   | 36193722  | 36194122 | Promoter (2-3kb)  | 20      | 36190765  | 36221944 | 2957          | ENSG00000088367 | EPB41L1      |
| NR4A2_Medium | chr20   | 36314757  | 36315157 | Promoter (8-9kb)  | 20      | 36306381  | 36528633 | 8376          | ENSG00000080845 | DLGAP4       |
| NR4A2_Medium | chr20   | 36483709  | 36484109 | Promoter (8-9kb)  | 20      | 36492383  | 36527231 | -8274         | ENSG00000080845 | DLGAP4       |
| NR4A2_Medium | chr20   | 36617301  | 36617701 | Promoter (9-10kb) | 20      | 36607805  | 36612557 | 9496          | ENSG00000101084 | RAB5IF       |
| NR4A2_Medium | chr20   | 36724873  | 36725273 | Promoter (3-4kb)  | 20      | 36652375  | 36721787 | -3086         | ENSG00000101079 | NDRG3        |
| NR4A2_Medium | chr20   | 36896058  | 36896458 | Promoter (8-9kb)  | 20      | 36887455  | 36894235 | 8603          | ENSG00000101342 | TLDC2        |
| NR4A2_Medium | chr20   | 37261789  | 37262189 | Promoter (<=1kb)  | 20      | 37251082  | 37261835 | 0             | ENSG00000118702 | GHRH         |
| NR4A2_Medium | chr20   | 37911073  | 37911473 | Promoter (7-8kb)  | 20      | 37903142  | 37944136 | 7931          | ENSG00000132821 | VSTM2L       |
| NR4A2_Medium | chr20   | 38070864  | 38071264 | Promoter (4-5kb)  | 20      | 38066181  | 38070617 | 4683          | ENSG00000101413 | RPRD1B       |
| NR4A2_Medium | chr20   | 38313636  | 38314036 | Promoter (3-4kb)  | 20      | 38317649  | 38337325 | -3613         | ENSG00000101425 | BPI          |
| NR4A2_Medium | chr20   | 38421271  | 38421671 | Promoter (<=1kb)  | 20      | 38420592  | 38421392 | 0             | ENSG00000196756 | SNHG17       |
| NR4A2_Medium | chr20   | 38652970  | 38653370 | Promoter (5-6kb)  | 20      | 38647063  | 38651035 | 5907          | ENSG00000124143 | ARHGAP40     |
| NR4A2_Medium | chr20   | 38920727  | 38921127 | Promoter (5-6kb)  | 20      | 38926312  | 38953106 | -5185         | ENSG00000101447 | FAM83D       |
| NR4A2_Medium | chr20   | 39226159  | 39226559 | Promoter (1-2kb)  | 20      | 39213777  | 39224748 | -1411         | ENSG00000230324 | LINC01734    |
| NR4A2_Medium | chr20   | 41128738  | 41129138 | Promoter (7-8kb)  | 20      | 41136960  | 41175721 | -7822         | ENSG00000124181 | PLCG1        |
| NR4A2_Medium | chr20   | 41262023  | 41262423 | Promoter (9-10kb) | 20      | 41238727  | 41272245 | 9822          | ENSG00000174306 | ZHX3         |
| NR4A2_Medium | chr20   | 42480689  | 42481089 | Promoter (8-9kb)  | 20      | 42072774  | 42472569 | -8120         | ENSG00000196090 | PTPRT        |
| NR4A2_Medium | chr20   | 42680766  | 42681166 | Promoter (4-5kb)  | 20      | 42685404  | 42686217 | -4238         | ENSG00000229042 | LOC101927159 |
| NR4A2_Medium | chr20   | 42958237  | 42958637 | Promoter (7-8kb)  | 20      | 42885842  | 42966419 | 7782          | ENSG00000196090 | PTPRT        |
| NR4A2_Medium | chr20   | 43667989  | 43668389 | Promoter (<=1kb)  | 20      | 43667114  | 43716482 | 875           | ENSG00000101057 | MYBL2        |
| NR4A2_Medium | chr20   | 43903805  | 43904205 | Promoter (9-10kb) | 20      | 43894720  | 43895468 | 9085          | ENSG00000233277 | LINC01728    |
| NR4A2_Medium | chr20   | 44050483  | 44050883 | Promoter (3-4kb)  | 20      | 44054351  | 44069616 | -3468         | ENSG00000124191 | TOX2         |
| NR4A2_Medium | chr20   | 44179722  | 44180122 | Promoter (6-7kb)  | 20      | 44176817  | 44187093 | 6971          | ENSG00000149596 | JPH2         |
| NR4A2_Medium | chr20   | 44536413  | 44536813 | Promoter (4-5kb)  | 20      | 44531916  | 44624247 | 4497          | ENSG00000168734 | PKIG         |
| NR4A2_Medium | chr20   | 44559847  | 44560247 | Promoter (3-4kb)  | 20      | 44564201  | 44614768 | -3954         | ENSG00000168734 | PKIG         |
| NR4A2_Medium | chr20   | 45109108  | 45109508 | Promoter (5-6kb)  | 20      | 45109452  | 45115162 | 5654          | ENSG00000175121 | WFDC5        |
| NR4A2_Medium | chr20   | 45913221  | 45913621 | Promoter (1-2kb)  | 20      | 45898806  | 45912155 | -1066         | ENSG00000100979 | PLTP         |
| NR4A2_Medium | chr20   | 45962469  | 45962869 | Promoter (1-2kb)  | 20      | 45961506  | 45964516 | 1647          | ENSG00000198026 | ZNF335       |
| NR4A2_Medium | chr20   | 46312107  | 46312507 | Promoter (3-4kb)  | 20      | 46173739  | 46308498 | -3609         | ENSG00000149654 | CDH22        |
| NR4A2_Medium | chr20   | 47302736  | 47303136 | Promoter (3-4kb)  | 20      | 47210413  | 47298900 | -3836         | ENSG00000101040 | ZMYND8       |
| NR4A2_Medium | chr20   | 48659123  | 48659523 | Promoter (1-2kb)  | 20      | 48624252  | 48657127 | -1996         | ENSG00000124126 | PREX1        |
| NR4A2_Medium | chr20   | 49153373  | 49153773 | Promoter (<=1kb)  | 20      | 49113341  | 49154068 | 295           | ENSG00000124214 | STAU1        |
| NR4A2_Medium | chr20   | 49261865  | 49262265 | Promoter (8-9kb)  | 20      | 49255933  | 49271223 | 8958          | ENSG00000124201 | ZNFX1        |
| NR4A2_Medium | chr20   | 49923626  | 49924026 | Promoter (8-9kb)  | 20      | 49903391  | 49915529 | -8097         | ENSG00000158480 | SPATA2       |
| NR4A2_Medium | chr20   | 50330248  | 50330648 | Promoter (8-9kb)  | 20      | 50310711  | 50321342 | -8906         | ENSG00000233077 | LINC01271    |
| NR4A2_Medium | chr20   | 50804571  | 50804971 | Promoter (9-10kb) | 20      | 50795100  | 50833020 | 9471          | ENSG00000124243 | BCAS4        |
| NR4A2_Medium |         |           |          |                   |         |           |          |               |                 |              |



| Condition    | peakChr | peakStart | peakEnd  | annotation        | geneChr | geneStart | geneEnd  | distanceToTSS | geneID          | geneSymbol     |
|--------------|---------|-----------|----------|-------------------|---------|-----------|----------|---------------|-----------------|----------------|
| NR4A2_Medium | chr20   | 57392167  | 57392567 | Promoter (<=1kb)  | 20      | 57392230  | 57407860 | 0             | ENSG00000132819 | RBM38          |
| NR4A2_Medium | chr20   | 58520046  | 58520446 | Promoter (2-3kb)  | 20      | 58523160  | 58573824 | -2714         | ENSG00000231290 | APCDD1L-DT     |
| NR4A2_Medium | chr20   | 58694934  | 58695334 | Promoter (<=1kb)  | 20      | 58694421  | 58713580 | 513           | ENSG00000254995 | STX16-NPEPL1   |
| NR4A2_Medium | chr20   | 58814762  | 58815162 | Promoter (2-3kb)  | 20      | 58817615  | 58817694 | 2532          | ENSG00000284040 | MIR296         |
| NR4A2_Medium | chr20   | 58986664  | 58987064 | Promoter (<=1kb)  | 20      | 58987710  | 58995133 | -646          | ENSG00000101158 | NELFCD         |
| NR4A2_Medium | chr20   | 59187715  | 59188115 | Promoter (2-3kb)  | 20      | 59191020  | 59259110 | -2905         | ENSG00000124203 | ZNF831         |
| NR4A2_Medium | chr20   | 59604604  | 59605004 | Promoter (<=1kb)  | 20      | 59604540  | 59847711 | 64            | ENSG00000087495 | PHACTR3        |
| NR4A2_Medium | chr20   | 59828943  | 59829343 | Promoter (6-7kb)  | 20      | 59835853  | 59847711 | -6510         | ENSG00000087495 | PHACTR3        |
| NR4A2_Medium | chr20   | 59980170  | 59980570 | Promoter (5-6kb)  | 20      | 59986014  | 59989153 | -5444         | ENSG00000124215 | CDH26          |
| NR4A2_Medium | chr20   | 60298769  | 60299169 | Promoter (9-10kb) | 20      | 60308474  | 60308567 | -9305         | ENSG00000207802 | MIR646         |
| NR4A2_Medium | chr20   | 61721469  | 61721869 | Promoter (1-2kb)  | 20      | 61717506  | 61719748 | -1721         | ENSG00000179253 | LOC100128310   |
| NR4A2_Medium | chr20   | 62177628  | 62178028 | Promoter (5-6kb)  | 20      | 62183029  | 62194053 | -5001         | ENSG00000101181 | MTG2           |
| NR4A2_Medium | chr20   | 62293744  | 62294144 | Promoter (2-3kb)  | 20      | 62291562  | 62294114 | 2182          | ENSG00000130703 | OSBPL2         |
| NR4A2_Medium | chr20   | 62327180  | 62327580 | Promoter (<=1kb)  | 20      | 62325140  | 62326631 | -549          | ENSG00000130702 | LAMA5          |
| NR4A2_Medium | chr20   | 62433399  | 62433799 | Promoter (5-6kb)  | 20      | 62410237  | 62427539 | -5860         | ENSG00000130701 | RBBP8NL        |
| NR4A2_Medium | chr20   | 62757625  | 62758025 | Promoter (<=1kb)  | 20      | 62756631  | 62762771 | 994           | ENSG00000101188 | NTSR1          |
| NR4A2_Medium | chr20   | 62782948  | 62783348 | Promoter (5-6kb)  | 20      | 62774121  | 62776996 | -5952         | ENSG00000228705 | LINC00659      |
| NR4A2_Medium | chr20   | 62824766  | 62825166 | Promoter (2-3kb)  | 20      | 62822609  | 62828976 | 2157          | ENSG00000092758 | COL9A3         |
| NR4A2_Medium | chr20   | 62913032  | 62913432 | Promoter (<=1kb)  | 20      | 62905006  | 62914406 | 974           | ENSG00000101191 | DIDO1          |
| NR4A2_Medium | chr20   | 62963944  | 62964344 | Promoter (<=1kb)  | 20      | 62965006  | 62968597 | -662          | ENSG00000101194 | SLC17A9        |
| NR4A2_Medium | chr20   | 63033455  | 63033855 | Promoter (2-3kb)  | 20      | 63034383  | 63036353 | 2498          | NA              | LINC00029      |
| NR4A2_Medium | chr20   | 63172436  | 63172836 | Promoter (5-6kb)  | 20      | 63178500  | 63178586 | -5664         | ENSG00000207598 | MIR124-3       |
| NR4A2_Medium | chr20   | 63242536  | 63242936 | Promoter (3-4kb)  | 20      | 63238779  | 63238842 | 3757          | ENSG00000266463 | MIR3196        |
| NR4A2_Medium | chr20   | 63270057  | 63270457 | Promoter (2-3kb)  | 20      | 63241390  | 63272694 | 2237          | ENSG00000101198 | NKAIN4         |
| NR4A2_Medium | chr20   | 63309333  | 63309733 | Promoter (9-10kb) | 20      | 63319086  | 63328498 | -9353         | ENSG00000101203 | COL20A1        |
| NR4A2_Medium | chr20   | 63314039  | 63314439 | Promoter (4-5kb)  | 20      | 63319086  | 63328498 | -4647         | ENSG00000101203 | COL20A1        |
| NR4A2_Medium | chr20   | 63492324  | 63492724 | Promoter (6-7kb)  | 20      | 63490081  | 63498748 | 6024          | ENSG00000101210 | EEF1A2         |
| NR4A2_Medium | chr20   | 63523313  | 63523713 | Promoter (2-3kb)  | 20      | 63520777  | 63521949 | 2536          | ENSG00000125534 | PPDPF          |
| NR4A2_Medium | chr20   | 63617996  | 63618396 | Promoter (1-2kb)  | 20      | 63587602  | 63619876 | 1480          | ENSG00000101216 | GMEB2          |
| NR4A2_Medium | chr20   | 63627887  | 63628287 | Promoter (<=1kb)  | 20      | 63627250  | 63628707 | 637           | ENSG00000232442 | MHENCN         |
| NR4A2_Medium | chr20   | 63670728  | 63671128 | Promoter (5-6kb)  | 20      | 63665066  | 63674052 | 5662          | ENSG00000258366 | RTEL1          |
| NR4A2_Medium | chr20   | 63868825  | 63869225 | Promoter (3-4kb)  | 20      | 63865294  | 63891545 | 3531          | ENSG00000101150 | TPD52L2        |
| NR4A2_Medium | chr20   | 64042103  | 64042503 | Promoter (3-4kb)  | 20      | 64038140  | 64039778 | 3963          | ENSG00000196421 | C20orf204      |
| NR4A2_Medium | chr20   | 64075560  | 64075960 | Promoter (1-2kb)  | 20      | 64076955  | 64077010 | 1050          | ENSG00000274034 | MIR6813        |
| NR4A2_Medium | chr21   | 8219749   | 8220176  | Promoter (7-8kb)  | 21      | 8212572   | 8212724  | 7177          | ENSG00000276700 | RNA5-8SN4      |
| NR4A2_Medium | chr21   | 8991772   | 8992172  | Promoter (4-5kb)  | 21      | 8986999   | 8987178  | 4773          | ENSG00000275708 | MIR3648-1      |
| NR4A2_Medium | chr21   | 9823879   | 9824279  | Promoter (7-8kb)  | 21      | 9781910   | 9816833  | -7046         | ENSG00000280081 | LINC01667      |
| NR4A2_Medium | chr21   | 13403339  | 13403739 | Promoter (2-3kb)  | 21      | 13406384  | 13406460 | 2721          | ENSG00000266211 | MIR3156-3      |
| NR4A2_Medium | chr21   | 13514289  | 13514689 | Promoter (1-2kb)  | 21      | 13516107  | 13574999 | -1418         | ENSG00000228159 | LINC01674      |
| NR4A2_Medium | chr21   | 14842234  | 14842634 | Promoter (8-9kb)  | 21      | 14824254  | 14833656 | -8578         | NA              | LINC02246      |
| NR4A2_Medium | chr21   | 16425235  | 16425635 | Promoter (4-5kb)  | 21      | 16420576  | 16609792 | 4659          | ENSG00000215386 | MIR99AHG       |
| NR4A2_Medium | chr21   | 22098342  | 22098742 | Promoter (<=1kb)  | 21      | 22009158  | 22098459 | 0             | ENSG00000233215 | LINC01687      |
| NR4A2_Medium | chr21   | 25406348  | 25406748 | Promoter (6-7kb)  | 21      | 25385823  | 25399363 | -6985         | ENSG00000185433 | LINC00158      |
| NR4A2_Medium | chr21   | 26089159  | 26089559 | Promoter (<=1kb)  | 21      | 25945524  | 26090061 | 502           | ENSG00000142192 | APP            |
| NR4A2_Medium | chr21   | 26117314  | 26117714 | Promoter (5-6kb)  | 21      | 26089511  | 26112083 | -5231         | ENSG00000142192 | APP            |
| NR4A2_Medium | chr21   | 26951305  | 26951705 | Promoter (2-3kb)  | 21      | 26953961  | 26954043 | -2256         | ENSG00000266133 | MIR4759        |
| NR4A2_Medium | chr21   | 28175977  | 28176377 | Promoter (5-6kb)  | 21      | 28163602  | 28170143 | -5834         | ENSG00000236532 | LINC01695      |
| NR4A2_Medium | chr21   | 29056230  | 29056630 | Promoter (4-5kb)  | 21      | 29052123  | 29054488 | 4107          | ENSG00000156256 | USP16          |
| NR4A2_Medium | chr21   | 29075296  | 29075696 | Promoter (1-2kb)  | 21      | 29056322  | 29073797 | -1499         | ENSG00000156261 | CCT8           |
| NR4A2_Medium | chr21   | 29309721  | 29310121 | Promoter (4-5kb)  | 21      | 29305203  | 29326336 | 4518          | ENSG00000156273 | BACH1          |
| NR4A2_Medium | chr21   | 30322536  | 30322936 | Promoter (2-3kb)  | 21      | 30319124  | 30320315 | -2221         | ENSG00000197683 | KRTAP26-1      |
| NR4A2_Medium | chr21   | 30597732  | 30598132 | Promoter (<=1kb)  | 21      | 30598590  | 30598902 | 770           | ENSG00000186930 | KRTAP6-2       |
| NR4A2_Medium | chr21   | 31157453  | 31157853 | Promoter (3-4kb)  | 21      | 31118458  | 31160909 | 3056          | ENSG00000156299 | TIAM1          |
| NR4A2_Medium | chr21   | 31334954  | 31335354 | Promoter (8-9kb)  | 21      | 31266296  | 31344279 | 8925          | ENSG00000156299 | TIAM1          |
| NR4A2_Medium | chr21   | 31657327  | 31657727 | Promoter (1-2kb)  | 21      | 31659622  | 31668931 | -1895         | ENSG00000142168 | SOD1           |
| NR4A2_Medium | chr21   | 31878349  | 31878749 | Promoter (5-6kb)  | 21      | 31873020  | 32004064 | 5329          | ENSG00000142149 | HUNK           |
| NR4A2_Medium | chr21   | 32289012  | 32289412 | Promoter (2-3kb)  | 21      | 32291813  | 32312290 | -2401         | ENSG00000170262 | MRAP           |
| NR4A2_Medium | chr21   | 32575785  | 32576185 | Promoter (<=1kb)  | 21      | 32572238  | 32575881 | 0             | ENSG00000265590 | CFAP298-TCP10L |
| NR4A2_Medium | chr21   | 32586063  | 32586463 | Promoter (<=1kb)  | 21      | 32576659  | 32585533 | -530          | ENSG00000242220 | TCP10L         |
| NR4A2_Medium | chr21   | 32600549  | 32600949 | Promoter (2-3kb)  | 21      | 32592079  | 32603237 | 2288          | ENSG00000159079 | CFAP298        |
| NR4A2_Medium | chr21   | 32958273  | 32958673 | Promoter (<=1kb)  | 21      | 32958888  | 32960566 | -215          | ENSG00000228961 | LINC01690      |
| NR4A2_Medium | chr21   | 33065686  | 33066086 | Promoter (4-5kb)  | 21      | 33070141  | 33072413 | -4055         | ENSG00000184221 | OLIG1          |
| NR4A2_Medium | chr21   | 33591740  | 33592140 | Promoter (<=1kb)  | 21      | 33589461  | 33591718 | -22           | ENSG00000205758 | CRYZL1         |
| NR4A2_Medium | chr21   | 33879021  | 33879421 | Promoter (3-4kb)  | 21      | 33875360  | 33886354 | 3661          | ENSG00000205726 | ITSN1          |
| NR4A2_Medium | chr21   | 34072929  | 34073329 | Promoter (<=1kb)  | 21      | 34073224  | 34143034 | 0             | ENSG00000243927 | MRPS6          |
| NR4A2_Medium | chr21   | 34562431  | 34562831 | Promoter (2-3kb)  | 21      | 34516484  | 34560179 | -2252         | ENSG00000159200 | RCAN1          |
| NR4A2_Medium | chr21   | 34823940  | 34824340 | Promoter (5-6kb)  | 21      | 34821279  | 34829970 | 5630          | ENSG00000159216 | RUNX1          |
| NR4A2_Medium | chr21   | 34889629  | 34890029 | Promoter (<=1kb)  | 21      | 34834410  | 34889790 | 0             | ENSG00000159216 | RUNX1          |
| NR4A2_Medium | chr21   | 35040501  | 35040901 | Promoter (8-9kb)  | 21      | 34892925  | 35049270 | 8369          | ENSG00000159216 | RUNX1          |
| NR4A2_Medium | chr21   | 36133265  | 36133665 | Promoter (<=1kb)  | 21      | 36132801  | 36134006 | 341           | ENSG00000236830 | CBR3-AS1       |
| NR4A2_Medium | chr21   | 36371492  | 36371892 | Promoter (1-2kb)  | 21      | 36369611  | 36386148 | 1881          | ENSG00000159256 | MORC3          |
| NR4A2_Medium | chr21   | 36983533  | 36983933 | Promoter (2-3kb)  | 21      | 36750888  | 36980964 | -2569         | ENSG00000159267 | HLCS           |
| NR4A2_Medium | chr21   | 37117483  | 37117883 | Promoter (9-10kb) | 21      | 37107738  | 37203112 | 9745          | ENSG00000182670 | TTC3           |
| NR4A2_Medium | chr21   | 38743051  | 38743451 | Promoter (<=1kb)  | 21      | 38739021  | 38742517 | -534          | ENSG00000223806 | LINC00114      |
| NR4A2_Medium | chr21   | 39375953  | 39376353 | Promoter (1-2kb)  | 21      | 39377698  | 39406615 | -1345         | ENSG00000182093 | GET1           |
| NR4A2_Medium | chr21   | 39405628  | 39406028 | Promoter (4-5kb)  | 21      | 39410869  | 39428528 | -4841         | ENSG00000182093 | GET1           |
| NR4A2_Medium | chr21   | 39409318  | 39409718 | Promoter (1-2kb)  | 21      | 39410869  | 39428528 | -1151         | ENSG00000182093 | GET1           |
| NR4A2_Medium | chr21   | 39555397  | 39555797 | Promoter (<=1kb)  | 21      | 39556442  | 39673137 | -645          | ENSG00000183778 | B3GALT5        |
| NR4A2_Medium | chr21   | 39760583  | 39760983 | Promoter (9-10kb) | 21      | 39751172  | 39788188 | 9411          | ENSG00000183067 | IGSF5          |
| NR4A2_Medium | chr21   | 40639099  | 40639499 | Promoter (8-9kb)  | 21      | 40618507  | 40630767 | -8332         | ENSG00000233756 | DSCAM-IT1      |
| NR4A2_Medium | chr21   | 41179023  | 41179423 | Promoter (1-2kb)  | 21      | 41175231  | 41180818 | 1395          | ENSG00000280109 | PLAC4          |
| NR4A2_Medium | chr21   | 41508885  | 41509285 | Promoter (<=1kb)  | 21      | 41466009  | 41508158 | -727          | ENSG00000184012 | TMPRSS2        |
| NR4A2_Medium | chr21   | 41756431  | 41756831 | Promoter (9-10kb) | 21      | 41746772  | 41746841 | -9590         | ENSG00000275166 | MIR6814        |
| NR4A2_Medium | chr21   | 41830344  | 41830744 | Promoter (4-5kb)  | 21      | 41821191  | 41835518 | 4774          | ENSG00000141956 | PRDM15         |
| NR4A2_Medium | chr21   | 41840125  | 41840525 | Promoter (3-4kb)  | 21      | 41828321  | 41836932 | -3193         | ENSG00000141956 | PRDM15         |
| NR4A2_Medium | chr21   | 42026994  | 42027394 | Promoter (4-5kb)  | 21      | 42022267  | 42024924 | 4727          | ENSG00000237232 | ZNF295-AS1     |
| NR4A2_Medium | chr21   | 42106410  | 42106810 | Promoter (1-2kb)  | 21      | 42102134  | 42108534 | 1724          | ENSG00000184385 | UMODL1-AS1     |
| NR4A2_Medium | chr21   | 42273365  | 42273765 | Promoter (2-3kb)  | 21      | 42276344  | 42297244 | -2579         | ENSG00000160179 | ABCG1          |
| NR4A2_Medium | chr21   | 42349061  | 42349461 | Promoter (1-2kb)  | 21      | 42346357  | 42350994 | 1533          | ENSG00000160181 | TFF2           |
| NR4A2_Medium | chr21   | 42388318  | 42388718 | Promoter (<=1kb)  | 21      | 42371890  | 42389118 | 400           | ENSG00000160183 | TMPRSS3        |
| NR4A2_Medium | chr21   | 42617151  | 42617551 | Promoter (2-3kb)  | 21      | 42599280  | 42615058 | -2093         | ENSG00000225431 | LINC01671      |
| NR4A2_Medium | chr21   | 42690917  | 42691317 | Promoter (4-5kb)  | 21      | 42686197  | 42762139 | 4720          | ENSG00000160191 | PDE9A          |
| NR4A2_Medium | chr21   | 43340864  | 43341264 | Promoter (8-9kb)  | 21      | 43322417  | 43332039 | -8825         | NA              | LINC00322      |
| NR4A2_Medium | chr21   | 43467697  | 43468097 | Promoter (2-3kb)  | 21      | 43462094  | 43464973 | -2            |                 |                |

| Condition    | peakChr | peakStart | peakEnd  | annotation        | geneChr | geneStart | geneEnd  | distanceToTSS | geneID          | geneSymbol   |
|--------------|---------|-----------|----------|-------------------|---------|-----------|----------|---------------|-----------------|--------------|
| NR4A2_Medium | chr21   | 45507303  | 45507703 | Promoter (1-2kb)  | 21      | 45506019  | 45512567 | 1284          | ENSG00000182871 | COL18A1      |
| NR4A2_Medium | chr21   | 45508167  | 45508567 | Promoter (2-3kb)  | 21      | 45506019  | 45512567 | 2148          | ENSG00000182871 | COL18A1      |
| NR4A2_Medium | chr21   | 45529362  | 45529762 | Promoter (1-2kb)  | 21      | 45493572  | 45531541 | 1779          | ENSG00000173638 | SLC19A1      |
| NR4A2_Medium | chr21   | 45635684  | 45636084 | Promoter (7-8kb)  | 21      | 45643694  | 45788739 | -7610         | ENSG00000183570 | PCBP3        |
| NR4A2_Medium | chr21   | 45896373  | 45896773 | Promoter (<=1kb)  | 21      | 45896294  | 45941706 | 79            | ENSG00000183570 | PCBP3        |
| NR4A2_Medium | chr21   | 45910869  | 45911269 | Promoter (2-3kb)  | 21      | 45914038  | 45941883 | -2769         | ENSG00000183570 | PCBP3        |
| NR4A2_Medium | chr21   | 45912215  | 45912615 | Promoter (1-2kb)  | 21      | 45914038  | 45941883 | -1423         | ENSG00000183570 | PCBP3        |
| NR4A2_Medium | chr21   | 45984744  | 45985421 | Promoter (1-2kb)  | 21      | 45987109  | 45987633 | -1688         | ENSG00000142156 | COL6A1       |
| NR4A2_Medium | chr21   | 45999846  | 46000246 | Promoter (<=1kb)  | 21      | 45999400  | 46000928 | 446           | ENSG00000142156 | COL6A1       |
| NR4A2_Medium | chr21   | 46123557  | 46124120 | Promoter (2-3kb)  | 21      | 46120560  | 46125894 | 2997          | ENSG00000142173 | COL6A2       |
| NR4A2_Medium | chr21   | 46268090  | 46268490 | Promoter (<=1kb)  | 21      | 46235133  | 46268062 | -28           | ENSG00000160294 | MCM3AP       |
| NR4A2_Medium | chr21   | 46307004  | 46307404 | Promoter (4-5kb)  | 21      | 46301710  | 46311631 | 4227          | ENSG00000160298 | C21orf58     |
| NR4A2_Medium | chr21   | 46466994  | 46467394 | Promoter (4-5kb)  | 21      | 46462471  | 46469306 | 4523          | ENSG00000223692 | DIP2A-IT1    |
| NR4A2_Medium | chr22   | 17076153  | 17076553 | Promoter (8-9kb)  | 22      | 17084954  | 17100469 | -8401         | ENSG00000177663 | IL17RA       |
| NR4A2_Medium | chr22   | 17185024  | 17185424 | Promoter (3-4kb)  | 22      | 17182641  | 17188727 | 3303          | ENSG00000093072 | ADA2         |
| NR4A2_Medium | chr22   | 17886822  | 17887222 | Promoter (8-9kb)  | 22      | 17860163  | 17895288 | 8066          | ENSG00000243156 | MICAL3       |
| NR4A2_Medium | chr22   | 18991454  | 18991854 | Promoter (1-2kb)  | 22      | 18989919  | 19020248 | 1535          | ENSG00000273032 | DGCR5        |
| NR4A2_Medium | chr22   | 18995916  | 18996316 | Promoter (1-2kb)  | 22      | 18998274  | 19014786 | -1958         | ENSG00000273032 | DGCR5        |
| NR4A2_Medium | chr22   | 19006782  | 19007182 | Promoter (8-9kb)  | 22      | 18998274  | 19014786 | 8508          | ENSG00000273032 | DGCR5        |
| NR4A2_Medium | chr22   | 19054565  | 19054965 | Promoter (2-3kb)  | 22      | 19037837  | 19057053 | 2088          | ENSG00000070413 | DGCR2        |
| NR4A2_Medium | chr22   | 19219487  | 19219887 | Promoter (6-7kb)  | 22      | 19221573  | 19226320 | 6433          | ENSG00000070371 | CLTCL1       |
| NR4A2_Medium | chr22   | 19223493  | 19223893 | Promoter (2-3kb)  | 22      | 19221573  | 19226320 | 2427          | ENSG00000070371 | CLTCL1       |
| NR4A2_Medium | chr22   | 19297834  | 19298234 | Promoter (6-7kb)  | 22      | 19179473  | 19291719 | -6115         | ENSG00000070371 | CLTCL1       |
| NR4A2_Medium | chr22   | 19896060  | 19896460 | Promoter (1-2kb)  | 22      | 19875522  | 19898041 | 1581          | ENSG00000184470 | TXNRD2       |
| NR4A2_Medium | chr22   | 19999556  | 19999956 | Promoter (8-9kb)  | 22      | 19971228  | 19990794 | -8762         | ENSG00000099889 | ARVCF        |
| NR4A2_Medium | chr22   | 20122984  | 20123384 | Promoter (<=1kb)  | 22      | 20122607  | 20127353 | 377           | ENSG00000099901 | RANBP1       |
| NR4A2_Medium | chr22   | 20691341  | 20691741 | Promoter (1-2kb)  | 22      | 20690031  | 20691317 | 1310          | NA              | POM121L4P    |
| NR4A2_Medium | chr22   | 21735108  | 21735508 | Promoter (<=1kb)  | 22      | 21704082  | 21735755 | 247           | ENSG00000100027 | YPEL1        |
| NR4A2_Medium | chr22   | 21975322  | 21975722 | Promoter (<=1kb)  | 22      | 21972219  | 21975796 | 74            | ENSG00000100038 | TOP3B        |
| NR4A2_Medium | chr22   | 22291684  | 22292084 | Promoter (6-7kb)  | 22      | 22298124  | 22329122 | -6040         | NA              | BMS1P20      |
| NR4A2_Medium | chr22   | 23120006  | 23120406 | Promoter (1-2kb)  | 22      | 23122378  | 23123342 | -1972         | ENSG00000128266 | GNAZ         |
| NR4A2_Medium | chr22   | 23533779  | 23534179 | Promoter (2-3kb)  | 22      | 23536881  | 23539480 | -2702         | NA              | PCAT14       |
| NR4A2_Medium | chr22   | 24545136  | 24545536 | Promoter (1-2kb)  | 22      | 24542830  | 24544083 | -1053         | ENSG00000138867 | GUCD1        |
| NR4A2_Medium | chr22   | 24556224  | 24556624 | Promoter (<=1kb)  | 22      | 24556032  | 24609150 | 192           | ENSG00000100028 | SNRPD3       |
| NR4A2_Medium | chr22   | 24633441  | 24633841 | Promoter (<=1kb)  | 22      | 24632954  | 24650012 | 487           | NA              | BCRP3        |
| NR4A2_Medium | chr22   | 24660928  | 24661328 | Promoter (9-10kb) | 22      | 24645171  | 24651657 | -9271         | NA              | POM121L10P   |
| NR4A2_Medium | chr22   | 24777752  | 24778152 | Promoter (3-4kb)  | 22      | 24719472  | 24774720 | -3032         | ENSG00000184571 | PIWIL3       |
| NR4A2_Medium | chr22   | 25115892  | 25116292 | Promoter (3-4kb)  | 22      | 25102433  | 25112692 | -3200         | ENSG00000203280 | KIAA1671-AS1 |
| NR4A2_Medium | chr22   | 25203320  | 25203720 | Promoter (3-4kb)  | 22      | 25199873  | 25207267 | 3447          | ENSG00000100053 | CRYBB3       |
| NR4A2_Medium | chr22   | 25740812  | 25741212 | Promoter (<=1kb)  | 22      | 25742144  | 26027766 | -932          | ENSG00000133454 | MYO18B       |
| NR4A2_Medium | chr22   | 26373753  | 26374153 | Promoter (9-10kb) | 22      | 26364749  | 26377720 | 9004          | ENSG00000100095 | SEZ6L        |
| NR4A2_Medium | chr22   | 26692368  | 26692768 | Promoter (<=1kb)  | 22      | 26693693  | 26719686 | -925          | NA              | MIATNB       |
| NR4A2_Medium | chr22   | 27069605  | 27070005 | Promoter (8-9kb)  | 22      | 27057513  | 27061247 | -8358         | ENSG00000236858 | LOC284898    |
| NR4A2_Medium | chr22   | 27310191  | 27310591 | Promoter (<=1kb)  | 22      | 27310651  | 27317456 | -60           | ENSG00000226741 | LINC02554    |
| NR4A2_Medium | chr22   | 28791029  | 28791429 | Promoter (5-6kb)  | 22      | 28794559  | 28797045 | 5616          | ENSG00000100219 | XBP1         |
| NR4A2_Medium | chr22   | 28984548  | 28984948 | Promoter (2-3kb)  | 22      | 28987052  | 29053965 | -2104         | ENSG00000183579 | ZNRF3        |
| NR4A2_Medium | chr22   | 29053903  | 29054303 | Promoter (7-8kb)  | 22      | 29058672  | 29061844 | 7541          | ENSG00000100249 | C22orf31     |
| NR4A2_Medium | chr22   | 29122152  | 29122552 | Promoter (<=1kb)  | 22      | 29121441  | 29138771 | 711           | ENSG00000183762 | KREMEN1      |
| NR4A2_Medium | chr22   | 29139254  | 29139654 | Promoter (2-3kb)  | 22      | 29142030  | 29154769 | -2376         | ENSG00000183762 | KREMEN1      |
| NR4A2_Medium | chr22   | 29308903  | 29309303 | Promoter (<=1kb)  | 22      | 29310279  | 29311107 | -976          | ENSG00000185340 | GAS2L1       |
| NR4A2_Medium | chr22   | 29350465  | 29350865 | Promoter (<=1kb)  | 22      | 29349273  | 29351747 | 882           | ENSG00000100280 | AP1B1        |
| NR4A2_Medium | chr22   | 29509426  | 29509826 | Promoter (1-2kb)  | 22      | 29508329  | 29511442 | 1616          | ENSG00000100296 | THOC5        |
| NR4A2_Medium | chr22   | 29644324  | 29644724 | Promoter (9-10kb) | 22      | 29654657  | 29695059 | -9933         | ENSG00000186575 | NF2          |
| NR4A2_Medium | chr22   | 30637724  | 30638124 | Promoter (1-2kb)  | 22      | 30636523  | 30669016 | 1201          | ENSG00000100036 | SLC35E4      |
| NR4A2_Medium | chr22   | 30811477  | 30811877 | Promoter (8-9kb)  | 22      | 30803086  | 30889635 | 8391          | ENSG00000184792 | OSBP2        |
| NR4A2_Medium | chr22   | 30933445  | 30933845 | Promoter (<=1kb)  | 22      | 30926611  | 30932894 | -551          | ENSG00000133422 | MORC2        |
| NR4A2_Medium | chr22   | 31094376  | 31094776 | Promoter (<=1kb)  | 22      | 31095560  | 31104624 | -784          | ENSG00000183963 | SMTN         |
| NR4A2_Medium | chr22   | 31107834  | 31108234 | Promoter (<=1kb)  | 22      | 31104779  | 31107568 | -266          | ENSG00000198832 | SELENOM      |
| NR4A2_Medium | chr22   | 31145999  | 31146399 | Promoter (5-6kb)  | 22      | 31134807  | 31140508 | -5491         | ENSG00000100078 | PLA2G3       |
| NR4A2_Medium | chr22   | 31208619  | 31209019 | Promoter (3-4kb)  | 22      | 31212239  | 31259046 | -3220         | ENSG00000182541 | LIMK2        |
| NR4A2_Medium | chr22   | 31390579  | 31390979 | Promoter (8-9kb)  | 22      | 31399604  | 31434452 | -8625         | ENSG00000185721 | DRG1         |
| NR4A2_Medium | chr22   | 31417761  | 31418161 | Promoter (8-9kb)  | 22      | 31426513  | 31434155 | -8352         | ENSG00000185721 | DRG1         |
| NR4A2_Medium | chr22   | 31791856  | 31792256 | Promoter (<=1kb)  | 22      | 31792687  | 31804219 | -431          | ENSG00000100150 | DEPDC5       |
| NR4A2_Medium | chr22   | 31828326  | 31828726 | Promoter (5-6kb)  | 22      | 31833849  | 31838721 | -5123         | ENSG00000100150 | DEPDC5       |
| NR4A2_Medium | chr22   | 32162907  | 32163307 | Promoter (3-4kb)  | 22      | 32149006  | 32159322 | -3585         | ENSG00000205856 | C22orf42     |
| NR4A2_Medium | chr22   | 32206295  | 32206695 | Promoter (1-2kb)  | 22      | 32205165  | 32273615 | 1130          | ENSG00000242082 | SLC5A4-AS1   |
| NR4A2_Medium | chr22   | 32798830  | 32799230 | Promoter (2-3kb)  | 22      | 32801701  | 32863043 | -2471         | ENSG00000100234 | TIMP3        |
| NR4A2_Medium | chr22   | 33709802  | 33710202 | Promoter (4-5kb)  | 22      | 33704786  | 33704922 | -4880         | ENSG00000253007 | SNORA50B     |
| NR4A2_Medium | chr22   | 33873695  | 33874095 | Promoter (<=1kb)  | 22      | 33650595  | 33873405 | -290          | ENSG00000133424 | LARGE1       |
| NR4A2_Medium | chr22   | 35543694  | 35544094 | Promoter (2-3kb)  | 22      | 35540831  | 35553999 | 2863          | ENSG00000100302 | RASD2        |
| NR4A2_Medium | chr22   | 36033193  | 36033593 | Promoter (4-5kb)  | 22      | 35738736  | 36028824 | -4369         | ENSG00000100320 | RBFOX2       |
| NR4A2_Medium | chr22   | 36498861  | 36499261 | Promoter (<=1kb)  | 22      | 36488599  | 36498397 | -464          | ENSG00000100350 | FOXRED2      |
| NR4A2_Medium | chr22   | 37079417  | 37079817 | Promoter (5-6kb)  | 22      | 37082850  | 37084825 | 5008          | ENSG00000187045 | TMPRSS6      |
| NR4A2_Medium | chr22   | 37091024  | 37091424 | Promoter (6-7kb)  | 22      | 37082850  | 37084825 | -6199         | ENSG00000187045 | TMPRSS6      |
| NR4A2_Medium | chr22   | 37141947  | 37142347 | Promoter (1-2kb)  | 22      | 37139143  | 37143621 | 1274          | ENSG00000100385 | IL2RB        |
| NR4A2_Medium | chr22   | 37511195  | 37511595 | Promoter (<=1kb)  | 22      | 37507882  | 37510565 | -630          | ENSG00000100065 | CARD10       |
| NR4A2_Medium | chr22   | 37630866  | 37631266 | Promoter (<=1kb)  | 22      | 37630668  | 37632677 | 198           | ENSG00000100083 | GGA1         |
| NR4A2_Medium | chr22   | 37939726  | 37940126 | Promoter (7-8kb)  | 22      | 37932595  | 37941187 | 7131          | ENSG00000100139 | MICALL1      |
| NR4A2_Medium | chr22   | 37941324  | 37941724 | Promoter (8-9kb)  | 22      | 37932595  | 37941187 | 8729          | ENSG00000100139 | MICALL1      |
| NR4A2_Medium | chr22   | 37957938  | 37958338 | Promoter (4-5kb)  | 22      | 37953788  | 37972272 | 4150          | ENSG00000100142 | POLR2F       |
| NR4A2_Medium | chr22   | 38109004  | 38109404 | Promoter (1-2kb)  | 22      | 38084903  | 38110645 | 1241          | ENSG00000128298 | BAIAP2L2     |
| NR4A2_Medium | chr22   | 38200501  | 38200901 | Promoter (1-2kb)  | 22      | 38201932  | 38216503 | -1031         | ENSG00000185022 | MAFF         |
| NR4A2_Medium | chr22   | 38202618  | 38203018 | Promoter (<=1kb)  | 22      | 38202796  | 38214760 | 0             | ENSG00000185022 | MAFF         |
| NR4A2_Medium | chr22   | 38217663  | 38218063 | Promoter (2-3kb)  | 22      | 38111754  | 38214778 | -2885         | ENSG00000184381 | PLA2G6       |
| NR4A2_Medium | chr22   | 38250964  | 38251364 | Promoter (4-5kb)  | 22      | 38225578  | 38246738 | -4226         | ENSG00000198792 | TMEM184B     |
| NR4A2_Medium | chr22   | 39093197  | 39093597 | Promoter (3-4kb)  | 22      | 39097224  | 39102558 | -3627         | ENSG00000100298 | APOBEC3H     |
| NR4A2_Medium | chr22   | 39137092  | 39137492 | Promoter (2-3kb)  | 22      | 39133691  | 39134779 | -2313         | ENSG00000100307 | CBX7         |
| NR4A2_Medium | chr22   | 39249766  | 39250166 | Promoter (4-5kb)  | 22      | 39223359  | 39244982 | -4784         | ENSG00000100311 | PDGFB        |
| NR4A2_Medium | chr22   | 39565877  | 39566277 | Promoter (4-5kb)  | 22      | 39570753  | 39684528 | -4476         | ENSG00000100346 | CACNA1I      |
| NR4A2_Medium | chr22   | 39887912  | 39888312 | Promoter (5-6kb)  | 22      | 39743044  | 39893760 | 5448          | ENSG00000176177 | ENTHD1       |
| NR4A2_Medium | chr22   | 40007336  | 40007736 | Promoter (1-2kb)  | 22      | 40009688  | 40030031 | -1952         | ENSG00000133477 | FAM83F       |
| NR4A2_Medium | chr22   | 40017088  | 40017488 | Promoter (7-8kb)  | 22      | 40009688  | 40030031 | 7400          | ENSG00000133477 | FAM83F       |
| NR4A2_Medium | chr22   | 40440214  | 40440614 | Promoter (3-4kb)  | 22      | 40410282  | 40436310 | -3904         | ENSG00000196588 | MRTFA        |
| NR4A2_Medium | chr22   | 41085788  | 41086188 | Promoter (6-7kb)  | 22      | 41092513  | 41092566 | -6325         | ENSG00000284015 | MIR1281      |
| NR4A2_Medium | chr22   | 4         |          |                   |         |           |          |               |                 |              |



| Condition    | peakChr | peakStart  | peakEnd  | annotation        | geneChr | geneStart | geneEnd  | distanceToTSS | geneID          | geneSymbol   |
|--------------|---------|------------|----------|-------------------|---------|-----------|----------|---------------|-----------------|--------------|
| NR4A2_Medium | chr22   | 43940296   | 43940696 | Promoter (7-8kb)  | 22      | 43933007  | 43939393 | 7289          | ENSG00000100344 | PNPLA3       |
| NR4A2_Medium | chr22   | 44091004   | 44091404 | Promoter (4-5kb)  | 22      | 44086684  | 44100089 | 4320          | ENSG00000188677 | PARVB        |
| NR4A2_Medium | chr22   | 44175370   | 44175770 | Promoter (2-3kb)  | 22      | 44172984  | 44187172 | 2386          | ENSG00000138964 | PARVG        |
| NR4A2_Medium | chr22   | 44194185   | 44194585 | Promoter (1-2kb)  | 22      | 44196098  | 44219533 | -1513         | ENSG00000138964 | PARVG        |
| NR4A2_Medium | chr22   | 44617631   | 44618031 | Promoter (7-8kb)  | 22      | 44606939  | 44625419 | 7388          | NA              | LINC00229    |
| NR4A2_Medium | chr22   | 44798995   | 44799395 | Promoter (2-3kb)  | 22      | 44801820  | 44825551 | -2425         | ENSG00000241484 | ARHGAP8      |
| NR4A2_Medium | chr22   | 44858977   | 44859377 | Promoter (<=1kb)  | 22      | 44859661  | 44862463 | -284          | ENSG00000241484 | ARHGAP8      |
| NR4A2_Medium | chr22   | 45001566   | 45001966 | Promoter (1-2kb)  | 22      | 45000565  | 45003619 | 1653          | ENSG00000230922 | LOC101927551 |
| NR4A2_Medium | chr22   | 45528050   | 45528450 | Promoter (2-3kb)  | 22      | 45525675  | 45542214 | 2375          | ENSG00000077942 | FBLN1        |
| NR4A2_Medium | chr22   | 45571681   | 45572081 | Promoter (4-5kb)  | 22      | 45577039  | 45578434 | -4958         | ENSG00000077942 | FBLN1        |
| NR4A2_Medium | chr22   | 45733199   | 45733599 | Promoter (3-4kb)  | 22      | 45729441  | 45823277 | 3758          | ENSG00000130638 | ATXN10       |
| NR4A2_Medium | chr22   | 46000078   | 46000478 | Promoter (6-7kb)  | 22      | 46006616  | 46010777 | -6138         | ENSG00000280424 | LOC730668    |
| NR4A2_Medium | chr22   | 46057609   | 46058009 | Promoter (2-3kb)  | 22      | 46054915  | 46057210 | 2694          | NA              | PRR34-AS1    |
| NR4A2_Medium | chr22   | 46244813   | 46245213 | Promoter (3-4kb)  | 22      | 46244011  | 46248285 | 3072          | ENSG00000205643 | CDPF1        |
| NR4A2_Medium | chr22   | 46326231   | 46326631 | Promoter (2-3kb)  | 22      | 46328923  | 46330152 | -2292         | ENSG00000075218 | GTSE1        |
| NR4A2_Medium | chr22   | 46347649   | 46348049 | Promoter (2-3kb)  | 22      | 46350345  | 46352841 | -2296         | ENSG00000100416 | TRMU         |
| NR4A2_Medium | chr22   | 46911226   | 46911626 | Promoter (4-5kb)  | 22      | 46915328  | 46915908 | 4282          | ENSG00000280080 | TBC1D22A-AS1 |
| NR4A2_Medium | chr22   | 47487818   | 47488218 | Promoter (<=1kb)  | 22      | 47461299  | 47487111 | -707          | ENSG00000218357 | LINC01644    |
| NR4A2_Medium | chr22   | 48542201   | 48542868 | Promoter (4-5kb)  | 22      | 48538902  | 48547342 | 4474          | ENSG00000281732 | LOC284933    |
| NR4A2_Medium | chr22   | 48585052   | 48585452 | Promoter (8-9kb)  | 22      | 48576453  | 48750488 | 8599          | ENSG00000219438 | TAF5         |
| NR4A2_Medium | chr22   | 48686885   | 48687344 | Promoter (5-6kb)  | 22      | 48693247  | 48750408 | -5903         | ENSG00000219438 | TAF5         |
| NR4A2_Medium | chr22   | 48689218   | 48689618 | Promoter (3-4kb)  | 22      | 48693247  | 48750408 | -3629         | ENSG00000219438 | TAF5         |
| NR4A2_Medium | chr22   | 48858812   | 48859212 | Promoter (7-8kb)  | 22      | 48866770  | 48898386 | -7558         | ENSG00000205632 | LINC01310    |
| NR4A2_Medium | chr22   | 48887863   | 48888263 | Promoter (4-5kb)  | 22      | 48892713  | 48897220 | -4450         | ENSG00000205632 | LINC01310    |
| NR4A2_Medium | chr22   | 50062218   | 50062618 | Promoter (5-6kb)  | 22      | 50015127  | 50056935 | -5283         | ENSG00000138892 | TTL8         |
| NR4A2_Medium | chr22   | 50213723   | 50214123 | Promoter (6-7kb)  | 22      | 50217694  | 50220416 | 6293          | ENSG00000128159 | TUBGCP6      |
| NR4A2_Medium | chr22   | 50436331   | 50436731 | Promoter (3-4kb)  | 22      | 50439753  | 50441074 | -3022         | ENSG00000100239 | PPP6R2       |
| NR4A2_Medium | chr22   | 50457392   | 50457792 | Promoter (<=1kb)  | 22      | 50456589  | 50457347 | -45           | ENSG00000100241 | SBF1         |
| NR4A2_Medium | chr22   | 50521798   | 50522198 | Promoter (<=1kb)  | 22      | 50522525  | 50523471 | -327          | ENSG00000052770 | NCAPH2       |
| NR4A2_Medium | chr22   | 50536729   | 50537129 | Promoter (4-5kb)  | 22      | 50531745  | 50532580 | -4149         | ENSG00000177989 | ODF3B        |
| NR4A2_R848   | chr1    | 770185     | 770585   | Promoter (3-4kb)  | 1       | 764723    | 774280   | 3695          | NA              | LOC100288069 |
| NR4A2_R848   | chr1    | 1176962    | 1177362  | Promoter (2-3kb)  | 1       | 1179697   | 1185864  | -2335         | ENSG00000162571 | TTL10        |
| NR4A2_R848   | chr1    | 1479336    | 1479762  | Promoter (<=1kb)  | 1       | 1479049   | 1482662  | 287           | ENSG00000160072 | ATAD3B       |
| NR4A2_R848   | chr1    | 1595040    | 1595440  | Promoter (4-5kb)  | 1       | 1598012   | 1600135  | 4695          | ENSG00000228594 | FNDC10       |
| NR4A2_R848   | chr1    | 1595944    | 1596408  | Promoter (3-4kb)  | 1       | 1598012   | 1600135  | 3727          | ENSG00000228594 | FNDC10       |
| NR4A2_R848   | chr1    | 1612678    | 1613078  | Promoter (2-3kb)  | 1       | 1615415   | 1630605  | -2337         | ENSG00000197530 | MIB2         |
| NR4A2_R848   | chr1    | 1985375    | 1985775  | Promoter (5-6kb)  | 1       | 1987962   | 1990929  | 5154          | ENSG00000142609 | CFAP74       |
| NR4A2_R848   | chr1    | 2155198    | 2155598  | Promoter (9-10kb) | 1       | 2145387   | 2185116  | 9811          | ENSG00000067606 | PRKCZ        |
| NR4A2_R848   | chr1    | 2166023    | 2166423  | Promoter (2-3kb)  | 1       | 2168848   | 2185393  | -2425         | ENSG00000067606 | PRKCZ        |
| NR4A2_R848   | chr1    | 2435914    | 2436604  | Promoter (9-10kb) | 1       | 2425980   | 2479804  | 9934          | ENSG00000149527 | PLCH2        |
| NR4A2_R848   | chr1    | 3016023    | 3016423  | Promoter (5-6kb)  | 1       | 3021467   | 3022903  | -5044         | ENSG00000169717 | ACTRT2       |
| NR4A2_R848   | chr1    | 3025879    | 3026390  | Promoter (4-5kb)  | 1       | 3021467   | 3022903  | 4412          | ENSG00000169717 | ACTRT2       |
| NR4A2_R848   | chr1    | 3051801    | 3052201  | Promoter (9-10kb) | 1       | 3059617   | 3061751  | 9550          | ENSG00000177133 | PRDM16-DT    |
| NR4A2_R848   | chr1    | 3128897    | 3129297  | Promoter (<=1kb)  | 1       | 3127975   | 3128035  | 922           | ENSG00000283572 | MIR4251      |
| NR4A2_R848   | chr1    | 3133524    | 3133924  | Promoter (5-6kb)  | 1       | 3127975   | 3128035  | 5549          | ENSG00000283572 | MIR4251      |
| NR4A2_R848   | chr1    | 3470484    | 3470884  | Promoter (<=1kb)  | 1       | 3471607   | 3474457  | -723          | ENSG00000130762 | ARHGEF16     |
| NR4A2_R848   | chr1    | 3473841    | 3474241  | Promoter (1-2kb)  | 1       | 3472769   | 3481113  | 1072          | ENSG00000130762 | ARHGEF16     |
| NR4A2_R848   | chr1    | 3605241    | 3605641  | Promoter (5-6kb)  | 1       | 3490562   | 3611277  | 5636          | ENSG00000162591 | MEGF6        |
| NR4A2_R848   | chr1    | 3679589    | 3679989  | Promoter (2-3kb)  | 1       | 3682366   | 3733079  | -2377         | ENSG00000078900 | TP73         |
| NR4A2_R848   | chr1    | 3698671    | 3699071  | Promoter (<=1kb)  | 1       | 3698058   | 3733091  | 613           | ENSG00000078900 | TP73         |
| NR4A2_R848   | chr1    | 3725454    | 3725961  | Promoter (1-2kb)  | 1       | 3727478   | 3733367  | -1517         | ENSG00000078900 | TP73         |
| NR4A2_R848   | chr1    | 3726575    | 3726975  | Promoter (<=1kb)  | 1       | 3727478   | 3733367  | -503          | ENSG00000078900 | TP73         |
| NR4A2_R848   | chr1    | 3769709    | 3770109  | Promoter (2-3kb)  | 1       | 3772761   | 3775908  | -2652         | ENSG00000235169 | SMIM1        |
| NR4A2_R848   | chr1    | 3930350    | 3930750  | Promoter (9-10kb) | 1       | 3940486   | 3949866  | -9736         | NA              | LINC01346    |
| NR4A2_R848   | chr1    | 4647108    | 4647598  | Promoter (7-8kb)  | 1       | 4654609   | 4792534  | -7011         | ENSG00000196581 | AJAP1        |
| NR4A2_R848   | chr1    | 5868719    | 5869119  | Promoter (<=1kb)  | 1       | 5862811   | 5868375  | -344          | ENSG00000131697 | NPHP4        |
| NR4A2_R848   | chr1    | 5873370    | 5873770  | Promoter (<=1kb)  | 1       | 5867082   | 5873841  | 71            | ENSG00000131697 | NPHP4        |
| NR4A2_R848   | chr1    | 5879625    | 5880025  | Promoter (2-3kb)  | 1       | 5874905   | 5877466  | -2159         | ENSG00000131697 | NPHP4        |
| NR4A2_R848   | chr1    | 5996320    | 5996720  | Promoter (3-4kb)  | 1       | 5992760   | 6086371  | 3560          | ENSG00000069424 | KCNAB2       |
| NR4A2_R848   | chr1    | 6097161    | 6097561  | Promoter (2-3kb)  | 1       | 6094483   | 6101187  | 2678          | ENSG00000069424 | KCNAB2       |
| NR4A2_R848   | chr1    | 6106964    | 6107364  | Promoter (<=1kb)  | 1       | 6105081   | 6106772  | -192          | ENSG00000116254 | CHD5         |
| NR4A2_R848   | chr1    | 6108699    | 6109099  | Promoter (1-2kb)  | 1       | 6105081   | 6106772  | -1927         | ENSG00000116254 | CHD5         |
| NR4A2_R848   | chr1    | 6149487    | 6149887  | Promoter (5-6kb)  | 1       | 6105081   | 6144104  | -5383         | ENSG00000116254 | CHD5         |
| NR4A2_R848   | chr1    | 6174330    | 6174730  | Promoter (5-6kb)  | 1       | 6105091   | 6180023  | 5293          | ENSG00000116254 | CHD5         |
| NR4A2_R848   | chr1    | 6175328    | 6175728  | Promoter (4-5kb)  | 1       | 6105091   | 6180023  | 4295          | ENSG00000116254 | CHD5         |
| NR4A2_R848   | chr1    | 6352266    | 6352666  | Promoter (<=1kb)  | 1       | 6281130   | 6352249  | -17           | ENSG00000097021 | ACOT7        |
| NR4A2_R848   | chr1    | 6426146    | 6426546  | Promoter (1-2kb)  | 1       | 6424788   | 6456671  | 1358          | ENSG00000187017 | ESPN         |
| NR4A2_R848   | chr1    | 10166999   | 10167399 | Promoter (3-4kb)  | 1       | 10170956  | 10180016 | -3557         | ENSG00000130939 | UBE4B        |
| NR4A2_R848   | chr1    | 10661756   | 10662156 | Promoter (<=1kb)  | 1       | 10658007  | 10661398 | -358          | ENSG00000130940 | CASZ1        |
| NR4A2_R848   | chr1    | 11033218   | 11033618 | Promoter (9-10kb) | 1       | 11037693  | 11043198 | 9580          | ENSG00000009724 | MASP2        |
| NR4A2_R848   | chr1    | 11041251   | 11041651 | Promoter (1-2kb)  | 1       | 11037693  | 11043198 | 1547          | ENSG00000009724 | MASP2        |
| NR4A2_R848   | chr1    | 11042078   | 11042695 | Promoter (<=1kb)  | 1       | 11037693  | 11043198 | 503           | ENSG00000009724 | MASP2        |
| NR4A2_R848   | chr1    | 11608888   | 11609288 | Promoter (<=1kb)  | 1       | 11609468  | 11613358 | -180          | ENSG00000235643 | LINC01647    |
| NR4A2_R848   | chr1    | 12585136   | 12585536 | Promoter (6-7kb)  | 1       | 12578957  | 12579023 | -6113         | ENSG00000276830 | MIR6730      |
| NR4A2_R848   | chr1    | 12647960   | 12648360 | Promoter (3-4kb)  | 1       | 12644547  | 12667086 | 3413          | ENSG00000204518 | AADA4L4      |
| NR4A2_R848   | chr1    | 13372099   | 13372499 | Promoter (<=1kb)  | 1       | 13369067  | 13371900 | -199          | ENSG00000204480 | PRAMEF19     |
| NR4A2_R848   | chr1    | 15396622   | 15397022 | Promoter (5-6kb)  | 1       | 15391147  | 15400283 | 5475          | ENSG00000142621 | FHAD1        |
| NR4A2_R848   | chr1    | 16045456   | 16045856 | Promoter (1-2kb)  | 1       | 16043777  | 16057308 | 1679          | ENSG00000184908 | CLCNKB       |
| NR4A2_R848   | chr1    | 16624606   | 16625006 | Promoter (1-2kb)  | 1       | 16618253  | 16626386 | 1380          | ENSG00000215908 | CROCCP2      |
| NR4A2_R848   | chr1    | 16632251   | 16632651 | Promoter (1-2kb)  | 1       | 16618256  | 16631109 | -1142         | ENSG00000215908 | CROCCP2      |
| NR4A2_R848   | chr1    | 16716412   | 16716812 | Promoter (3-4kb)  | 1       | 16692280  | 16720157 | 3345          | NA              | ESPNP        |
| NR4A2_R848   | chr1    | 16999227   | 16999627 | Promoter (<=1kb)  | 1       | 16995859  | 17000291 | 664           | ENSG00000159363 | ATP13A2      |
| NR4A2_R848   | chr1    | 18356825   | 18357220 | Promoter (4-5kb)  | 1       | 18361367  | 18378483 | -4097         | ENSG00000117154 | IGSF21       |
| NR4A2_R848   | chr1    | 18384608   | 18385163 | Promoter (8-9kb)  | 1       | 18375957  | 18376920 | 8651          | ENSG00000117154 | IGSF21       |
| NR4A2_R848   | chr1    | 21832632   | 21833032 | Promoter (<=1kb)  | 1       | 21829993  | 21833577 | 545           | ENSG00000142798 | HSPG2        |
| NR4A2_R848   | chr1    | 23625899   | 23626299 | Promoter (1-2kb)  | 1       | 23627334  | 23640568 | -1035         | ENSG00000197880 | MDS2         |
| NR4A2_R848   | chr1    | 25767638   | 25768061 | Promoter (4-5kb)  | 1       | 25772069  | 25782700 | -4008         | ENSG00000117643 | MAN1C1       |
| NR4A2_R848   | chr1    | 25768953   | 25769353 | Promoter (2-3kb)  | 1       | 25772069  | 25782700 | -2716         | ENSG00000117643 | MAN1C1       |
| NR4A2_R848   | chr1    | 27595261   | 27595661 | Promoter (7-8kb)  | 1       | 27552496  | 27603414 | 7753          | ENSG00000126705 | AHDC1        |
| NR4A2_R848   | chr1    | 29315799   | 29316199 | Promoter (1-2kb)  | 1       | 29317760  | 29325298 | -1561         | ENSG00000060656 | PTPRU        |
| NR4A2_R848   | chr1    | 31637345   | 31637745 | Promoter (1-2kb)  | 1       | 31633275  | 31635472 | -1873         | ENSG00000162517 | PEF1         |
| NR4A2_R848   | chr1    | 32898801   | 32899201 | Promoter (1-2kb)  | 1       | 32895305  | 32897756 | -1045         | ENSG00000121900 | TMEM54       |
| NR4A2_R848   | chr1    | 34777539   | 34777939 | Promoter (3-4kb)  | 1       | 34781214  | 34786364 | -3275         | ENSG00000188910 | GJB3         |
| NR4A2_R848   | chr1    | 38040286   | 38040686 | Promoter (6-7kb)  | 1       | 38043829  | 38046793 | 6107          | ENSG00000185668 | POU3F1       |
| NR4A2_R848   | chr1    | 42166444   | 42166844 | Promoter (1-2kb)  | 1       | 42162690  | 42164745 | -1699         | ENSG00000197273 | GUCA2A       |
| NR4A2_R848   | chr1    | 43423302</ |          |                   |         |           |          |               |                 |              |

| Condition  | peakChr | peakStart | peakEnd   | annotation        | geneChr | geneStart | geneEnd   | distanceToTSS | geneID          | geneSymbol |
|------------|---------|-----------|-----------|-------------------|---------|-----------|-----------|---------------|-----------------|------------|
| NR4A2_R848 | chr1    | 54790715  | 54791115  | Promoter (2-3kb)  | 1       | 54781596  | 54787995  | -2720         | ENSG00000006555 | TTC22      |
| NR4A2_R848 | chr1    | 85284629  | 85285029  | Promoter (7-8kb)  | 1       | 85276715  | 85399963  | 7914          | NA              | LOC646626  |
| NR4A2_R848 | chr1    | 109271138 | 109271538 | Promoter (<=1kb)  | 1       | 109270824 | 109275607 | 314           | ENSG00000143126 | CELSR2     |
| NR4A2_R848 | chr1    | 116428500 | 116428900 | Promoter (9-10kb) | 1       | 116396629 | 116418635 | -9865         | ENSG00000203865 | ATP1A1-AS1 |
| NR4A2_R848 | chr1    | 151651481 | 151651881 | Promoter (6-7kb)  | 1       | 151658235 | 151661536 | -6354         | ENSG00000143376 | SNX27      |
| NR4A2_R848 | chr1    | 152218704 | 152219104 | Promoter (5-6kb)  | 1       | 152212076 | 152224193 | 5089          | ENSG00000197915 | HRNR       |
| NR4A2_R848 | chr1    | 153938602 | 153939002 | Promoter (1-2kb)  | 1       | 153939588 | 153940652 | 1650          | ENSG00000198837 | DENND4B    |
| NR4A2_R848 | chr1    | 155066573 | 155066973 | Promoter (2-3kb)  | 1       | 155063761 | 155069538 | 2812          | ENSG00000243364 | EFNA4      |
| NR4A2_R848 | chr1    | 156244312 | 156244712 | Promoter (2-3kb)  | 1       | 156242189 | 156243289 | 2123          | ENSG00000242252 | BGLAP      |
| NR4A2_R848 | chr1    | 160194317 | 160194717 | Promoter (1-2kb)  | 1       | 160192638 | 160199053 | 1679          | ENSG00000143318 | CASQ1      |
| NR4A2_R848 | chr1    | 161066477 | 161066877 | Promoter (2-3kb)  | 1       | 161046948 | 161069666 | 2789          | ENSG00000186517 | ARHGAP30   |
| NR4A2_R848 | chr1    | 161144683 | 161145083 | Promoter (7-8kb)  | 1       | 161152776 | 161158199 | -7693         | ENSG00000143222 | UFC1       |
| NR4A2_R848 | chr1    | 182061443 | 182061843 | Promoter (<=1kb)  | 1       | 182054570 | 182061712 | 0             | ENSG00000179930 | ZNF648     |
| NR4A2_R848 | chr1    | 182379361 | 182379761 | Promoter (6-7kb)  | 1       | 182384415 | 182385939 | 6178          | ENSG00000135821 | GLUL       |
| NR4A2_R848 | chr1    | 182439576 | 182439976 | Promoter (7-8kb)  | 1       | 182447886 | 182472408 | -7910         | ENSG00000121446 | RGSL1      |
| NR4A2_R848 | chr1    | 182451821 | 182452221 | Promoter (1-2kb)  | 1       | 182453382 | 182471375 | -1161         | ENSG00000121446 | RGSL1      |
| NR4A2_R848 | chr1    | 201007030 | 201007835 | Promoter (1-2kb)  | 1       | 201001407 | 201005590 | -1440         | ENSG00000116852 | KIF21B     |
| NR4A2_R848 | chr1    | 201208745 | 201209145 | Promoter (3-4kb)  | 1       | 201212642 | 201228952 | -3497         | ENSG00000163395 | IGFN1      |
| NR4A2_R848 | chr1    | 201211137 | 201211537 | Promoter (1-2kb)  | 1       | 201212642 | 201228952 | -1105         | ENSG00000163395 | IGFN1      |
| NR4A2_R848 | chr1    | 202205157 | 202205623 | Promoter (1-2kb)  | 1       | 202203777 | 202319690 | 1380          | ENSG00000133067 | LGR6       |
| NR4A2_R848 | chr1    | 203228393 | 203228793 | Promoter (<=1kb)  | 1       | 203216670 | 203229645 | 852           | ENSG00000133063 | CHIT1      |
| NR4A2_R848 | chr1    | 203482554 | 203482954 | Promoter (6-7kb)  | 1       | 203475806 | 203491352 | 6748          | ENSG00000188783 | PRELP      |
| NR4A2_R848 | chr1    | 203792583 | 203792983 | Promoter (2-3kb)  | 1       | 203795654 | 203802173 | -2671         | ENSG00000058673 | ZC3H11A    |
| NR4A2_R848 | chr1    | 204080187 | 204080587 | Promoter (2-3kb)  | 1       | 204078129 | 204116627 | 2058          | ENSG00000143842 | SOX13      |
| NR4A2_R848 | chr1    | 205330843 | 205331243 | Promoter (8-9kb)  | 1       | 205337523 | 205339861 | 8618          | ENSG00000162873 | KLHDC8A    |
| NR4A2_R848 | chr1    | 211499250 | 211499650 | Promoter (6-7kb)  | 1       | 211476522 | 211492917 | -6333         | ENSG00000198570 | RD3        |
| NR4A2_R848 | chr1    | 212378121 | 212378521 | Promoter (<=1kb)  | 1       | 212375221 | 212377706 | -415          | ENSG00000065600 | PACC1      |
| NR4A2_R848 | chr1    | 224352587 | 224352987 | Promoter (3-4kb)  | 1       | 224356858 | 224379452 | -3871         | ENSG00000143771 | CNIH4      |
| NR4A2_R848 | chr1    | 226891827 | 226892227 | Promoter (1-2kb)  | 1       | 226890819 | 226895544 | 1008          | ENSG00000143801 | PSEN2      |
| NR4A2_R848 | chr1    | 226977951 | 226978351 | Promoter (<=1kb)  | 1       | 226977404 | 226987544 | 547           | ENSG00000163050 | COQ8A      |
| NR4A2_R848 | chr1    | 227560113 | 227560526 | Promoter (3-4kb)  | 1       | 227563543 | 227677443 | -3017         | ENSG00000181450 | ZNF678     |
| NR4A2_R848 | chr1    | 227719568 | 227719968 | Promoter (8-9kb)  | 1       | 227728539 | 227734352 | -8571         | ENSG00000143740 | SNAP47     |
| NR4A2_R848 | chr1    | 227952972 | 227953372 | Promoter (5-6kb)  | 1       | 227918656 | 227947932 | -5040         | ENSG00000143816 | WNT9A      |
| NR4A2_R848 | chr1    | 228070846 | 228071246 | Promoter (5-6kb)  | 1       | 228073909 | 228076550 | 5304          | ENSG00000276255 | LINC02809  |
| NR4A2_R848 | chr1    | 228071633 | 228072488 | Promoter (4-5kb)  | 1       | 228073909 | 228076550 | 4062          | ENSG00000276255 | LINC02809  |
| NR4A2_R848 | chr1    | 228152347 | 228152747 | Promoter (2-3kb)  | 1       | 228149930 | 228159826 | 2417          | ENSG00000198835 | GJC2       |
| NR4A2_R848 | chr1    | 228182546 | 228182946 | Promoter (7-8kb)  | 1       | 228174550 | 228175575 | 7996          | ENSG00000181873 | IBA57      |
| NR4A2_R848 | chr1    | 228622019 | 228622419 | Promoter (<=1kb)  | 1       | 228621447 | 228621565 | -454          | ENSG00000199352 | RNA5S1     |
| NR4A2_R848 | chr1    | 228635412 | 228635812 | Promoter (4-5kb)  | 1       | 228630390 | 228630508 | -4904         | ENSG00000199352 | RNA5S1     |
| NR4A2_R848 | chr1    | 230335584 | 230335984 | Promoter (<=1kb)  | 1       | 230323542 | 230336295 | 311           | ENSG00000177614 | PGBD5      |
| NR4A2_R848 | chr1    | 236685503 | 236685903 | Promoter (<=1kb)  | 1       | 236686454 | 236762943 | -551          | ENSG00000077522 | ACTN2      |
| NR4A2_R848 | chr1    | 248752846 | 248753246 | Promoter (2-3kb)  | 1       | 248739415 | 248755759 | 2228          | ENSG00000259823 | LYPD8      |
| NR4A2_R848 | chr2    | 318826    | 319521    | Promoter (<=1kb)  | 2       | 318053    | 342118    | 773           | NA              | LINC01865  |
| NR4A2_R848 | chr2    | 878512    | 878912    | Promoter (9-10kb) | 2       | 791614    | 868608    | -9904         | ENSG00000237667 | LINC01115  |
| NR4A2_R848 | chr2    | 1679052   | 1679452   | Promoter (2-3kb)  | 2       | 1666356   | 1676578   | -2474         | ENSG00000130508 | PXDN       |
| NR4A2_R848 | chr2    | 1866331   | 1866976   | Promoter (4-5kb)  | 2       | 1789241   | 1861677   | -4654         | ENSG00000186487 | MYT1L      |
| NR4A2_R848 | chr2    | 3287532   | 3287932   | Promoter (4-5kb)  | 2       | 3214186   | 3282826   | -4706         | ENSG00000032389 | EIPR1      |
| NR4A2_R848 | chr2    | 3527723   | 3528123   | Promoter (5-6kb)  | 2       | 3531990   | 3533370   | 5247          | ENSG00000171865 | RNASEH1    |
| NR4A2_R848 | chr2    | 3971383   | 3971783   | Promoter (1-2kb)  | 2       | 3972846   | 3973678   | 1895          | ENSG00000237401 | LINC01304  |
| NR4A2_R848 | chr2    | 6759929   | 6760329   | Promoter (9-10kb) | 2       | 6729168   | 6770311   | 9982          | ENSG00000205837 | LINC00487  |
| NR4A2_R848 | chr2    | 8390579   | 8390979   | Promoter (6-7kb)  | 2       | 8321904   | 8383819   | -6760         | ENSG00000236790 | LINC00299  |
| NR4A2_R848 | chr2    | 10189933  | 10190439  | Promoter (2-3kb)  | 2       | 10192614  | 10192671  | 2232          | ENSG00000265418 | MIR4261    |
| NR4A2_R848 | chr2    | 10312380  | 10312780  | Promoter (8-9kb)  | 2       | 10303700  | 10427617  | 8680          | ENSG00000115756 | HPCAL1     |
| NR4A2_R848 | chr2    | 10364289  | 10364689  | Promoter (3-4kb)  | 2       | 10368678  | 10427616  | -3989         | ENSG00000115756 | HPCAL1     |
| NR4A2_R848 | chr2    | 16073598  | 16073998  | Promoter (<=1kb)  | 2       | 16073398  | 16081117  | 200           | ENSG00000236289 | GACAT3     |
| NR4A2_R848 | chr2    | 20218355  | 20218755  | Promoter (4-5kb)  | 2       | 20204002  | 20223388  | 4633          | ENSG00000115884 | SDC1       |
| NR4A2_R848 | chr2    | 25124583  | 25124983  | Promoter (2-3kb)  | 2       | 25121673  | 25154361  | 2910          | ENSG00000084710 | EFR3B      |
| NR4A2_R848 | chr2    | 26461101  | 26461501  | Promoter (4-5kb)  | 2       | 26463506  | 26466325  | 4824          | ENSG00000115155 | OTOF       |
| NR4A2_R848 | chr2    | 26482714  | 26483114  | Promoter (4-5kb)  | 2       | 26457203  | 26478042  | -4672         | ENSG00000115155 | OTOF       |
| NR4A2_R848 | chr2    | 27147569  | 27147969  | Promoter (1-2kb)  | 2       | 27149004  | 27156974  | -1035         | ENSG00000163792 | TCF23      |
| NR4A2_R848 | chr2    | 27333969  | 27334369  | Promoter (1-2kb)  | 2       | 27326497  | 27335428  | 1059          | ENSG00000115207 | GTF3C2     |
| NR4A2_R848 | chr2    | 28989110  | 28989510  | Promoter (7-8kb)  | 2       | 28981298  | 29061373  | 7812          | ENSG00000189350 | TOGARAM2   |
| NR4A2_R848 | chr2    | 31388341  | 31388741  | Promoter (<=1kb)  | 2       | 31383001  | 31389633  | 892           | ENSG00000158125 | XDH        |
| NR4A2_R848 | chr2    | 33701490  | 33701890  | Promoter (4-5kb)  | 2       | 33706886  | 34297753  | -4996         | ENSG00000228262 | LINC01317  |
| NR4A2_R848 | chr2    | 46828419  | 46829113  | Promoter (<=1kb)  | 2       | 46827864  | 46859007  | 555           | ENSG00000239332 | LINC01119  |
| NR4A2_R848 | chr2    | 71577338  | 71577738  | Promoter (<=1kb)  | 2       | 71576899  | 71686763  | 439           | ENSG00000135636 | DYSF       |
| NR4A2_R848 | chr2    | 71612856  | 71613256  | Promoter (2-3kb)  | 2       | 71610779  | 71644033  | 2077          | ENSG00000135636 | DYSF       |
| NR4A2_R848 | chr2    | 71618295  | 71618710  | Promoter (7-8kb)  | 2       | 71610779  | 71644033  | 7516          | ENSG00000135636 | DYSF       |
| NR4A2_R848 | chr2    | 74138260  | 74138660  | Promoter (6-7kb)  | 2       | 74135401  | 74145508  | 6848          | ENSG00000163170 | BOLA3      |
| NR4A2_R848 | chr2    | 74330044  | 74330444  | Promoter (1-2kb)  | 2       | 74265232  | 74328235  | -1809         | ENSG00000188687 | SLC4A5     |
| NR4A2_R848 | chr2    | 74330514  | 74330914  | Promoter (2-3kb)  | 2       | 74265232  | 74328235  | -2279         | ENSG00000188687 | SLC4A5     |
| NR4A2_R848 | chr2    | 75560480  | 75560880  | Promoter (<=1kb)  | 2       | 75469302  | 75560923  | 43            | ENSG00000115363 | EVA1A      |
| NR4A2_R848 | chr2    | 84909606  | 84910006  | Promoter (2-3kb)  | 2       | 84870589  | 84907008  | -2598         | ENSG00000186854 | TRABD2A    |
| NR4A2_R848 | chr2    | 85334449  | 85334849  | Promoter (6-7kb)  | 2       | 85318020  | 85328296  | -6153         | ENSG00000152291 | TGOLN2     |
| NR4A2_R848 | chr2    | 85666002  | 85666402  | Promoter (1-2kb)  | 2       | 85658255  | 85668172  | 1770          | ENSG00000168878 | SFTPB      |
| NR4A2_R848 | chr2    | 86191452  | 86191852  | Promoter (1-2kb)  | 2       | 86193026  | 86193108  | 1256          | ENSG00000265420 | MIR4779    |
| NR4A2_R848 | chr2    | 94212374  | 94212774  | Promoter (3-4kb)  | 2       | 94195806  | 94208379  | -3995         | NA              | BMS1P14    |
| NR4A2_R848 | chr2    | 94214175  | 94214575  | Promoter (5-6kb)  | 2       | 94195806  | 94208379  | -5796         | NA              | BMS1P14    |
| NR4A2_R848 | chr2    | 94946529  | 94947156  | Promoter (<=1kb)  | 2       | 94908030  | 94947326  | 170           | ENSG00000259848 | LOC442028  |
| NR4A2_R848 | chr2    | 95310812  | 95311212  | Promoter (<=1kb)  | 2       | 95310222  | 95386076  | 590           | ENSG00000115041 | KCNIP3     |
| NR4A2_R848 | chr2    | 96801439  | 96801839  | Promoter (3-4kb)  | 2       | 96798278  | 96798353  | 3161          | ENSG00000264157 | MIR3127    |
| NR4A2_R848 | chr2    | 100613680 | 100614209 | Promoter (6-7kb)  | 2       | 100607121 | 100611542 | 6559          | ENSG00000234988 | LINC01849  |
| NR4A2_R848 | chr2    | 101992288 | 101992688 | Promoter (<=1kb)  | 2       | 101991960 | 102028544 | 328           | ENSG00000115590 | IL1R2      |
| NR4A2_R848 | chr2    | 110724792 | 110725192 | Promoter (7-8kb)  | 2       | 110732573 | 111094344 | -7381         | ENSG00000153093 | ACOXL      |
| NR4A2_R848 | chr2    | 120730429 | 120730829 | Promoter (4-5kb)  | 2       | 120735623 | 120951466 | -4794         | ENSG00000074047 | GLI2       |
| NR4A2_R848 | chr2    | 129933703 | 129934103 | Promoter (<=1kb)  | 2       | 129922863 | 129934317 | 214           | ENSG00000214100 | PLAC9P1    |
| NR4A2_R848 | chr2    | 131590783 | 131591183 | Promoter (<=1kb)  | 2       | 131591752 | 131628147 | -569          | NA              | POTEKP     |
| NR4A2_R848 | chr2    | 132258620 | 132259020 | Promoter (<=1kb)  | 2       | 132147591 | 132257969 | -651          | ENSG00000163046 | ANKRD30BL  |
| NR4A2_R848 | chr2    | 132266308 | 132266708 | Promoter (8-9kb)  | 2       | 132147591 | 132257969 | -8339         | ENSG00000163046 | ANKRD30BL  |
| NR4A2_R848 | chr2    | 132267234 | 132267680 | Promoter (9-10kb) | 2       | 132147591 | 132257969 | -9265         | ENSG00000163046 | ANKRD30BL  |
| NR4A2_R848 | chr2    | 135117360 | 135117791 | Promoter (6-7kb)  | 2       | 135124080 | 135130705 | -6289         | ENSG00000115839 | RAB3GAP1   |
| NR4A2_R848 | chr2    | 158673141 | 158673541 | Promoter (3-4kb)  | 2       | 158669170 | 158677355 | 3971          | ENSG00000144283 | PKP4       |
| NR4A2_R848 | chr2    | 170828384 | 170828836 | Promoter (<=1kb)  | 2       | 170828968 | 170831090 | -132          | EN              |            |



| Condition  | peakChr | peakStart | peakEnd   | annotation        | geneChr | geneStart | geneEnd   | distanceToTSS | geneID          | geneSymbol  |
|------------|---------|-----------|-----------|-------------------|---------|-----------|-----------|---------------|-----------------|-------------|
| NR4A2_R848 | chr2    | 233014549 | 233014949 | Promoter (1-2kb)  | 2       | 232878701 | 233013256 | -1293         | ENSG00000066248 | NGEF        |
| NR4A2_R848 | chr2    | 233035488 | 233035888 | Promoter (2-3kb)  | 2       | 233032672 | 233035057 | 2816          | ENSG00000115488 | NEU2        |
| NR4A2_R848 | chr2    | 237397188 | 237397588 | Promoter (<=1kb)  | 2       | 237324774 | 237396817 | -371          | ENSG00000163359 | COL6A3      |
| NR4A2_R848 | chr2    | 237517499 | 237517899 | Promoter (<=1kb)  | 2       | 237518029 | 237553991 | -130          | ENSG00000115648 | MLPH        |
| NR4A2_R848 | chr2    | 237518014 | 237518414 | Promoter (<=1kb)  | 2       | 237518029 | 237553991 | 0             | ENSG00000115648 | MLPH        |
| NR4A2_R848 | chr2    | 237578684 | 237579084 | Promoter (<=1kb)  | 2       | 237574326 | 237579570 | 486           | ENSG00000124839 | RAB17       |
| NR4A2_R848 | chr2    | 238117857 | 238118338 | Promoter (9-10kb) | 2       | 238127390 | 238133287 | -9052         | ENSG00000144488 | ESPNL       |
| NR4A2_R848 | chr2    | 238119035 | 238119435 | Promoter (7-8kb)  | 2       | 238127390 | 238133287 | -7955         | ENSG00000144488 | ESPNL       |
| NR4A2_R848 | chr2    | 238126925 | 238127325 | Promoter (<=1kb)  | 2       | 238127390 | 238133287 | -65           | ENSG00000144488 | ESPNL       |
| NR4A2_R848 | chr2    | 239150244 | 239150644 | Promoter (4-5kb)  | 2       | 239126633 | 239155013 | 4369          | ENSG00000068024 | HDAC4       |
| NR4A2_R848 | chr2    | 239159307 | 239159707 | Promoter (3-4kb)  | 2       | 239134349 | 239155575 | -3732         | ENSG00000068024 | HDAC4       |
| NR4A2_R848 | chr2    | 239345616 | 239346016 | Promoter (5-6kb)  | 2       | 239351724 | 239351804 | 5788          | ENSG00000264292 | MIR2467     |
| NR4A2_R848 | chr2    | 240443033 | 240443433 | Promoter (<=1kb)  | 2       | 240442327 | 240466358 | 706           | ENSG00000063660 | GPC1        |
| NR4A2_R848 | chr2    | 240509054 | 240509454 | Promoter (1-2kb)  | 2       | 240500524 | 240507809 | -1245         | ENSG00000144504 | ANKMY1      |
| NR4A2_R848 | chr2    | 240509935 | 240510335 | Promoter (2-3kb)  | 2       | 240500524 | 240507809 | -2126         | ENSG00000144504 | ANKMY1      |
| NR4A2_R848 | chr2    | 240527194 | 240527914 | Promoter (<=1kb)  | 2       | 240521939 | 240527881 | 0             | ENSG00000144504 | ANKMY1      |
| NR4A2_R848 | chr2    | 240593846 | 240594246 | Promoter (<=1kb)  | 2       | 240594241 | 240595103 | 0             | ENSG00000142330 | CAPN10      |
| NR4A2_R848 | chr2    | 240680648 | 240681048 | Promoter (1-2kb)  | 2       | 240676419 | 240679368 | -1280         | ENSG00000185176 | AQP12B      |
| NR4A2_R848 | chr2    | 240812622 | 240813022 | Promoter (5-6kb)  | 2       | 240788117 | 240818966 | 5944          | ENSG00000130294 | KIF1A       |
| NR4A2_R848 | chr2    | 240872165 | 240872565 | Promoter (<=1kb)  | 2       | 240871189 | 240876013 | 976           | ENSG00000172482 | AGXT        |
| NR4A2_R848 | chr2    | 240914819 | 240915219 | Promoter (8-9kb)  | 2       | 240906330 | 240993311 | 8489          | ENSG00000226321 | CROCC2      |
| NR4A2_R848 | chr2    | 240950833 | 240951233 | Promoter (1-2kb)  | 2       | 240949655 | 240950929 | 1178          | ENSG00000226321 | CROCC2      |
| NR4A2_R848 | chr2    | 240951482 | 240951882 | Promoter (1-2kb)  | 2       | 240949655 | 240950929 | 1827          | ENSG00000226321 | CROCC2      |
| NR4A2_R848 | chr2    | 240961878 | 240962278 | Promoter (2-3kb)  | 2       | 240959096 | 240959800 | -2078         | ENSG00000233392 | UICLM       |
| NR4A2_R848 | chr2    | 241139916 | 241140316 | Promoter (<=1kb)  | 2       | 241137007 | 241139595 | -321          | ENSG00000115687 | PASK        |
| NR4A2_R848 | chr2    | 241212731 | 241213131 | Promoter (<=1kb)  | 2       | 241212148 | 241212876 | 583           | ENSG00000146205 | ANO7        |
| NR4A2_R848 | chr2    | 241516432 | 241516836 | Promoter (6-7kb)  | 2       | 241500143 | 241509730 | -6702         | ENSG00000115694 | STK25       |
| NR4A2_R848 | chr2    | 241545659 | 241546265 | Promoter (5-6kb)  | 2       | 241551424 | 241562476 | -5159         | ENSG00000176720 | BOK         |
| NR4A2_R848 | chr3    | 10348206  | 10348606  | Promoter (2-3kb)  | 3       | 10326228  | 10346069  | -2137         | ENSG00000157087 | ATP2B2      |
| NR4A2_R848 | chr3    | 10450197  | 10450597  | Promoter (<=1kb)  | 3       | 10328203  | 10449780  | -417          | ENSG00000157087 | ATP2B2      |
| NR4A2_R848 | chr3    | 10510812  | 10511212  | Promoter (5-6kb)  | 3       | 10324023  | 10505586  | -5226         | ENSG00000157087 | ATP2B2      |
| NR4A2_R848 | chr3    | 10991945  | 10992345  | Promoter (<=1kb)  | 3       | 10992186  | 11039174  | 0             | ENSG00000157103 | SLC6A1      |
| NR4A2_R848 | chr3    | 12669142  | 12669542  | Promoter (4-5kb)  | 3       | 12583601  | 12664226  | -4916         | ENSG00000132155 | RAF1        |
| NR4A2_R848 | chr3    | 13617273  | 13617727  | Promoter (3-4kb)  | 3       | 13613898  | 13618993  | 3375          | ENSG00000163520 | FBLN2       |
| NR4A2_R848 | chr3    | 13629344  | 13629744  | Promoter (1-2kb)  | 3       | 13631329  | 13638380  | -1585         | ENSG00000163520 | FBLN2       |
| NR4A2_R848 | chr3    | 13868969  | 13869526  | Promoter (5-6kb)  | 3       | 13863668  | 13875113  | 5587          | ENSG00000154764 | WNT7A       |
| NR4A2_R848 | chr3    | 13935427  | 13935827  | Promoter (1-2kb)  | 3       | 13937273  | 14064237  | -1446         | ENSG00000180438 | TPRXL       |
| NR4A2_R848 | chr3    | 14683661  | 14684061  | Promoter (8-9kb)  | 3       | 14675179  | 14773034  | 8482          | ENSG00000131379 | C3orf20     |
| NR4A2_R848 | chr3    | 32068769  | 32069169  | Promoter (8-9kb)  | 3       | 31876433  | 32077580  | 8411          | ENSG00000144645 | OSBPL10     |
| NR4A2_R848 | chr3    | 37991296  | 37991696  | Promoter (<=1kb)  | 3       | 37991134  | 37997187  | 162           | ENSG00000136059 | VILL        |
| NR4A2_R848 | chr3    | 38115673  | 38116073  | Promoter (<=1kb)  | 3       | 38117043  | 38124025  | -970          | ENSG00000008226 | DLEC1       |
| NR4A2_R848 | chr3    | 42505306  | 42505706  | Promoter (2-3kb)  | 3       | 42502664  | 42532333  | 2642          | ENSG00000114812 | VIPR1       |
| NR4A2_R848 | chr3    | 45782268  | 45782668  | Promoter (9-10kb) | 3       | 45758504  | 45772339  | -9929         | ENSG00000163817 | SLC6A20     |
| NR4A2_R848 | chr3    | 46861918  | 46862318  | Promoter (<=1kb)  | 3       | 46857877  | 46861684  | -234          | ENSG00000160808 | MYL3        |
| NR4A2_R848 | chr3    | 47389646  | 47390046  | Promoter (8-9kb)  | 3       | 47381070  | 47396291  | 8576          | ENSG00000076201 | PTPN23      |
| NR4A2_R848 | chr3    | 47865677  | 47866077  | Promoter (8-9kb)  | 3       | 47855125  | 47857478  | -8199         | ENSG00000047849 | MAP4        |
| NR4A2_R848 | chr3    | 48411419  | 48411819  | Promoter (<=1kb)  | 3       | 48410015  | 48411967  | 148           | ENSG00000164050 | PLXNB1      |
| NR4A2_R848 | chr3    | 48582542  | 48582942  | Promoter (1-2kb)  | 3       | 48564073  | 48584520  | 1578          | ENSG00000114270 | COL7A1      |
| NR4A2_R848 | chr3    | 48976063  | 48976463  | Promoter (2-3kb)  | 3       | 48973615  | 48975111  | 2448          | ENSG00000177479 | ARIH2       |
| NR4A2_R848 | chr3    | 49272442  | 49272842  | Promoter (1-2kb)  | 3       | 49274120  | 49274186  | -1278         | ENSG00000264633 | MIR4271     |
| NR4A2_R848 | chr3    | 49895391  | 49895791  | Promoter (<=1kb)  | 3       | 49891771  | 49895439  | 0             | ENSG00000164078 | MST1R       |
| NR4A2_R848 | chr3    | 49922455  | 49922855  | Promoter (6-7kb)  | 3       | 49907160  | 49929526  | 6671          | ENSG00000164077 | MON1A       |
| NR4A2_R848 | chr3    | 50162760  | 50163160  | Promoter (3-4kb)  | 3       | 50159019  | 50189073  | 3741          | ENSG00000001617 | SEMA3F      |
| NR4A2_R848 | chr3    | 50372597  | 50372997  | Promoter (5-6kb)  | 3       | 50367465  | 50368197  | 5132          | ENSG00000114395 | CYB561D2    |
| NR4A2_R848 | chr3    | 51964283  | 51964683  | Promoter (1-2kb)  | 3       | 51957460  | 51963256  | -1027         | ENSG00000090097 | PCBP4       |
| NR4A2_R848 | chr3    | 52405196  | 52405596  | Promoter (<=1kb)  | 3       | 52403703  | 52405653  | 57            | ENSG00000163930 | BAP1        |
| NR4A2_R848 | chr3    | 53805610  | 53806010  | Promoter (1-2kb)  | 3       | 53807511  | 53812385  | -1501         | ENSG00000157388 | CACNA1D     |
| NR4A2_R848 | chr3    | 58652471  | 58652871  | Promoter (4-5kb)  | 3       | 58637155  | 58657696  | 4825          | ENSG00000198643 | FAM3D       |
| NR4A2_R848 | chr3    | 75669053  | 75669498  | Promoter (2-3kb)  | 3       | 75672300  | 75742048  | -2802         | ENSG00000242516 | LINC00960   |
| NR4A2_R848 | chr3    | 122452479 | 122452879 | Promoter (7-8kb)  | 3       | 122425680 | 122459885 | 7006          | ENSG00000114030 | KPNA1       |
| NR4A2_R848 | chr3    | 126104583 | 126104983 | Promoter (<=1kb)  | 3       | 126103640 | 126108069 | 943           | ENSG00000250218 | ALDH1L1-AS1 |
| NR4A2_R848 | chr3    | 126146430 | 126146830 | Promoter (9-10kb) | 3       | 126128390 | 126156683 | 9853          | ENSG00000144908 | ALDH1L1     |
| NR4A2_R848 | chr3    | 126205019 | 126205419 | Promoter (1-2kb)  | 3       | 126207255 | 126210166 | -1836         | ENSG00000246022 | ALDH1L1-AS2 |
| NR4A2_R848 | chr3    | 126212240 | 126212640 | Promoter (4-5kb)  | 3       | 126207255 | 126210166 | 4985          | ENSG00000246022 | ALDH1L1-AS2 |
| NR4A2_R848 | chr3    | 126481784 | 126482184 | Promoter (5-6kb)  | 3       | 126437601 | 126475891 | -5893         | ENSG00000070476 | ZXDC        |
| NR4A2_R848 | chr3    | 126995023 | 126995423 | Promoter (6-7kb)  | 3       | 126988594 | 127037392 | 6429          | ENSG00000114554 | PLXNA1      |
| NR4A2_R848 | chr3    | 127387144 | 127387544 | Promoter (3-4kb)  | 3       | 127322307 | 127390670 | 3126          | ENSG00000244215 | LINC02016   |
| NR4A2_R848 | chr3    | 127536877 | 127537277 | Promoter (<=1kb)  | 3       | 127480690 | 127536960 | 0             | ENSG00000239921 | LINC01471   |
| NR4A2_R848 | chr3    | 127576705 | 127577105 | Promoter (1-2kb)  | 3       | 127574978 | 127575683 | -1022         | ENSG00000163870 | TPRA1       |
| NR4A2_R848 | chr3    | 128466854 | 128467254 | Promoter (<=1kb)  | 3       | 128462439 | 128466968 | 0             | ENSG00000179407 | DNAJB8      |
| NR4A2_R848 | chr3    | 129010371 | 129010771 | Promoter (7-8kb)  | 3       | 128977013 | 129002690 | -7681         | ENSG00000114656 | CFAP92      |
| NR4A2_R848 | chr3    | 129394559 | 129394959 | Promoter (1-2kb)  | 3       | 129393172 | 129396293 | 1334          | ENSG00000251474 | RPL32P3     |
| NR4A2_R848 | chr3    | 129543963 | 129544363 | Promoter (<=1kb)  | 3       | 129543214 | 129551361 | 749           | ENSG00000178804 | H1-8        |
| NR4A2_R848 | chr3    | 133935470 | 133935870 | Promoter (5-6kb)  | 3       | 133928148 | 133929812 | -5658         | ENSG00000288547 | C3orf36     |
| NR4A2_R848 | chr3    | 134791455 | 134791855 | Promoter (3-4kb)  | 3       | 134795260 | 135260467 | -3405         | ENSG00000154928 | EPHB1       |
| NR4A2_R848 | chr3    | 141665397 | 141665797 | Promoter (2-3kb)  | 3       | 141663092 | 141729405 | 2305          | NA              | LINC02618   |
| NR4A2_R848 | chr3    | 142895177 | 142895577 | Promoter (5-6kb)  | 3       | 142817926 | 142889206 | -5971         | ENSG00000163710 | PCOLCE2     |
| NR4A2_R848 | chr3    | 150633735 | 150634135 | Promoter (6-7kb)  | 3       | 150626911 | 150627990 | 6824          | ENSG00000198843 | SELENOT     |
| NR4A2_R848 | chr3    | 150712221 | 150712621 | Promoter (4-5kb)  | 3       | 150707967 | 150719995 | 4254          | ENSG00000240137 | ERICH6-AS1  |
| NR4A2_R848 | chr3    | 156035284 | 156035684 | Promoter (2-3kb)  | 3       | 156037701 | 156453260 | -2017         | ENSG00000169282 | KCNAB1      |
| NR4A2_R848 | chr3    | 158571455 | 158571855 | Promoter (<=1kb)  | 3       | 158571567 | 158605402 | 0             | ENSG00000178053 | MLF1        |
| NR4A2_R848 | chr3    | 183819366 | 183819766 | Promoter (5-6kb)  | 3       | 183820163 | 183825225 | 5459          | ENSG00000180834 | MAP6D1      |
| NR4A2_R848 | chr3    | 184044811 | 184045211 | Promoter (7-8kb)  | 3       | 184053047 | 184060673 | -7836         | ENSG00000178084 | HTR3C       |
| NR4A2_R848 | chr3    | 184050641 | 184051041 | Promoter (2-3kb)  | 3       | 184053047 | 184060673 | -2006         | ENSG00000178084 | HTR3C       |
| NR4A2_R848 | chr3    | 184197665 | 184198065 | Promoter (4-5kb)  | 3       | 184193150 | 184193769 | 4515          | ENSG00000161204 | ABCF3       |
| NR4A2_R848 | chr3    | 184342923 | 184343323 | Promoter (<=1kb)  | 3       | 184342122 | 184343139 | 801           | ENSG00000175182 | FAM131A     |
| NR4A2_R848 | chr3    | 184414268 | 184414668 | Promoter (5-6kb)  | 3       | 184419869 | 184457891 | -5201         | ENSG00000224153 | LINC02054   |
| NR4A2_R848 | chr3    | 185576971 | 185577371 | Promoter (5-6kb)  | 3       | 185582496 | 185609285 | -5125         | ENSG00000163904 | SEN2P2      |
| NR4A2_R848 | chr3    | 186811761 | 186812161 | Promoter (4-5kb)  | 3       | 186804583 | 186807058 | -4703         | ENSG00000163918 | RFC4        |
| NR4A2_R848 | chr3    | 194324549 | 194325166 | Promoter (1-2kb)  | 3       | 194301199 | 194322871 | -1678         | ENSG00000214145 | LINC00887   |
| NR4A2_R848 | chr3    | 194327000 | 194327647 | Promoter (4-5kb)  | 3       | 194301199 | 194322871 | -4129         | ENSG00000214145 | LINC00887   |
| NR4A2_R848 | chr3    | 194680566 | 194680966 | Promoter (4-5kb)  | 3       | 194685883 | 194689037 | -4917         | ENSG00000185112 | FAM43A      |

| Condition  | peakChr | peakStart | peakEnd   | annotation        | geneChr | geneStart | geneEnd   | distanceToTSS | geneID          | geneSymbol    |
|------------|---------|-----------|-----------|-------------------|---------|-----------|-----------|---------------|-----------------|---------------|
| NR4A2_R848 | chr4    | 2826411   | 2826811   | Promoter (<=1kb)  | 4       | 2826696   | 2834289   | 0             | ENSG00000087266 | SH3BP2        |
| NR4A2_R848 | chr4    | 3234551   | 3234951   | Promoter (<=1kb)  | 4       | 3235424   | 3236179   | -473          | ENSG00000197386 | HTT           |
| NR4A2_R848 | chr4    | 3362375   | 3362775   | Promoter (7-8kb)  | 4       | 3369879   | 3439905   | -7104         | ENSG00000159788 | RGS12         |
| NR4A2_R848 | chr4    | 3468341   | 3468741   | Promoter (5-6kb)  | 4       | 3463311   | 3501473   | 5030          | ENSG00000175920 | DOK7          |
| NR4A2_R848 | chr4    | 3578091   | 3578491   | Promoter (1-2kb)  | 4       | 3576934   | 3590711   | 1157          | NA              | LINC00955     |
| NR4A2_R848 | chr4    | 3678643   | 3679043   | Promoter (<=1kb)  | 4       | 3673593   | 3677855   | -788          | ENSG00000250632 | LINC02171     |
| NR4A2_R848 | chr4    | 4226326   | 4226726   | Promoter (<=1kb)  | 4       | 4188803   | 4226889   | 163           | ENSG00000163982 | OTOP1         |
| NR4A2_R848 | chr4    | 4413425   | 4413825   | Promoter (9-10kb) | 4       | 4420221   | 4423688   | 9863          | ENSG00000168818 | STX18         |
| NR4A2_R848 | chr4    | 6299423   | 6299823   | Promoter (4-5kb)  | 4       | 6294771   | 6300807   | 4652          | ENSG00000109501 | WFS1          |
| NR4A2_R848 | chr4    | 6569785   | 6570185   | Promoter (5-6kb)  | 4       | 6575189   | 6621354   | -5004         | ENSG0000013288  | MAN2B2        |
| NR4A2_R848 | chr4    | 6579015   | 6579504   | Promoter (3-4kb)  | 4       | 6575215   | 6622401   | 3800          | ENSG0000013288  | MAN2B2        |
| NR4A2_R848 | chr4    | 6660540   | 6660940   | Promoter (2-3kb)  | 4       | 6663396   | 6676755   | -2456         | ENSG00000170846 | LOC93622      |
| NR4A2_R848 | chr4    | 6725895   | 6726295   | Promoter (9-10kb) | 4       | 6716174   | 6717664   | 9721          | ENSG00000186222 | BLOC1S4       |
| NR4A2_R848 | chr4    | 7316075   | 7316475   | Promoter (5-6kb)  | 4       | 7310450   | 7310524   | 5625          | ENSG00000264658 | MIR4798       |
| NR4A2_R848 | chr4    | 7400921   | 7401321   | Promoter (4-5kb)  | 4       | 7396278   | 7742836   | 4643          | ENSG00000184985 | SORCS2        |
| NR4A2_R848 | chr4    | 7724571   | 7725034   | Promoter (9-10kb) | 4       | 7734280   | 7740720   | -9246         | ENSG00000184985 | SORCS2        |
| NR4A2_R848 | chr4    | 7754823   | 7755223   | Promoter (<=1kb)  | 4       | 7754090   | 7778928   | 733           | ENSG00000272620 | AFAP1-AS1     |
| NR4A2_R848 | chr4    | 8011840   | 8012240   | Promoter (1-2kb)  | 4       | 8007385   | 8010728   | -1112         | ENSG00000163995 | ABLIM2        |
| NR4A2_R848 | chr4    | 8012286   | 8012686   | Promoter (1-2kb)  | 4       | 8007385   | 8010728   | -1558         | ENSG00000163995 | ABLIM2        |
| NR4A2_R848 | chr4    | 8033275   | 8033675   | Promoter (7-8kb)  | 4       | 8020213   | 8041436   | 7761          | ENSG00000163995 | ABLIM2        |
| NR4A2_R848 | chr4    | 8069477   | 8069877   | Promoter (1-2kb)  | 4       | 8008063   | 8071827   | 1950          | ENSG00000163995 | ABLIM2        |
| NR4A2_R848 | chr4    | 8149770   | 8150170   | Promoter (8-9kb)  | 4       | 7966990   | 8158689   | 8519          | ENSG00000163995 | ABLIM2        |
| NR4A2_R848 | chr4    | 8233765   | 8234406   | Promoter (2-3kb)  | 4       | 8231142   | 8241091   | 2623          | ENSG00000125089 | SH3TC1        |
| NR4A2_R848 | chr4    | 8367783   | 8368183   | Promoter (5-6kb)  | 4       | 8366712   | 8373815   | 5632          | ENSG00000087008 | ACOX3         |
| NR4A2_R848 | chr4    | 9368617   | 9369017   | Promoter (<=1kb)  | 4       | 9367874   | 9369070   | 743           | ENSG00000205946 | USP17L6P      |
| NR4A2_R848 | chr4    | 26492340  | 26492740  | Promoter (1-2kb)  | 4       | 26481396  | 26490484  | -1856         | ENSG00000163394 | CCKAR         |
| NR4A2_R848 | chr4    | 79258342  | 79258742  | Promoter (<=1kb)  | 4       | 79258781  | 79308654  | -39           | ENSG00000249307 | LINC01088     |
| NR4A2_R848 | chr4    | 99086492  | 99086892  | Promoter (<=1kb)  | 4       | 99076435  | 99085623  | -869          | ENSG00000197894 | ADH5          |
| NR4A2_R848 | chr4    | 108180162 | 108180932 | Promoter (6-7kb)  | 4       | 108173419 | 108176430 | 6743          | ENSG00000232021 | LEF1-AS1      |
| NR4A2_R848 | chr4    | 119406310 | 119406710 | Promoter (6-7kb)  | 4       | 119409892 | 119413366 | 6656          | NA              | LINC01061     |
| NR4A2_R848 | chr4    | 122145734 | 122146134 | Promoter (6-7kb)  | 4       | 122152333 | 122362752 | -6199         | ENSG00000138688 | KIAA1109      |
| NR4A2_R848 | chr4    | 131727810 | 131728210 | Promoter (<=1kb)  | 4       | 131727587 | 131791487 | 223           | ENSG00000251676 | SNHG27        |
| NR4A2_R848 | chr4    | 155383091 | 155383491 | Promoter (6-7kb)  | 4       | 155352684 | 155376970 | -6121         | ENSG00000164114 | MAP9          |
| NR4A2_R848 | chr4    | 184219999 | 184220399 | Promoter (<=1kb)  | 4       | 184116863 | 184221230 | 831           | ENSG00000164303 | ENPP6         |
| NR4A2_R848 | chr4    | 186160116 | 186160516 | Promoter (3-4kb)  | 4       | 186163558 | 186167655 | -3042         | ENSG00000109794 | FAM149A       |
| NR4A2_R848 | chr4    | 186604607 | 186605007 | Promoter (2-3kb)  | 4       | 186600331 | 186601700 | -2907         | ENSG00000083857 | FAT1          |
| NR4A2_R848 | chr5    | 142302    | 142702    | Promoter (1-2kb)  | 5       | 140566    | 157110    | 1736          | ENSG00000153404 | PLEKHG4B      |
| NR4A2_R848 | chr5    | 175799    | 176199    | Promoter (6-7kb)  | 5       | 169053    | 182589    | 6746          | ENSG00000153404 | PLEKHG4B      |
| NR4A2_R848 | chr5    | 193403    | 193803    | Promoter (1-2kb)  | 5       | 191495    | 196334    | 1908          | ENSG00000185028 | LRRC14B       |
| NR4A2_R848 | chr5    | 344454    | 344854    | Promoter (<=1kb)  | 5       | 343528    | 353911    | 926           | ENSG00000286169 | AHRR          |
| NR4A2_R848 | chr5    | 426533    | 426933    | Promoter (<=1kb)  | 5       | 427918    | 434409    | -985          | ENSG00000286169 | AHRR          |
| NR4A2_R848 | chr5    | 766227    | 766627    | Promoter (<=1kb)  | 5       | 716808    | 766919    | 292           | ENSG00000206077 | ZDHHC11B      |
| NR4A2_R848 | chr5    | 882672    | 883072    | Promoter (<=1kb)  | 5       | 876160    | 883369    | 297           | ENSG0000028310  | BRD9          |
| NR4A2_R848 | chr5    | 1180535   | 1180935   | Promoter (1-2kb)  | 5       | 1173141   | 1178605   | -1930         | ENSG00000249201 | CTD-3080P12.3 |
| NR4A2_R848 | chr5    | 1196783   | 1197183   | Promoter (4-5kb)  | 5       | 1201595   | 1223270   | -4412         | ENSG00000174358 | SLC6A19       |
| NR4A2_R848 | chr5    | 1198710   | 1199270   | Promoter (2-3kb)  | 5       | 1201595   | 1223270   | -2325         | ENSG00000174358 | SLC6A19       |
| NR4A2_R848 | chr5    | 1258887   | 1259287   | Promoter (5-6kb)  | 5       | 1254617   | 1264534   | 5247          | ENSG00000164362 | TERT          |
| NR4A2_R848 | chr5    | 1870965   | 1871365   | Promoter (9-10kb) | 5       | 1878785   | 1881093   | 9728          | ENSG00000113430 | IRX4          |
| NR4A2_R848 | chr5    | 2708666   | 2709066   | Promoter (3-4kb)  | 5       | 2712591   | 2715237   | -3525         | ENSG00000281560 | LSINCT5       |
| NR4A2_R848 | chr5    | 6334352   | 6334752   | Promoter (2-3kb)  | 5       | 6310441   | 6337292   | 2540          | ENSG00000250490 | LINC02145     |
| NR4A2_R848 | chr5    | 6447219   | 6447621   | Promoter (1-2kb)  | 5       | 6448859   | 6496723   | -1238         | ENSG00000215218 | UBE2QL1       |
| NR4A2_R848 | chr5    | 6785293   | 6785693   | Promoter (9-10kb) | 5       | 6775818   | 6833120   | 9475          | ENSG00000251365 | LINC02236     |
| NR4A2_R848 | chr5    | 28808888  | 28809288  | Promoter (<=1kb)  | 5       | 28809331  | 29163382  | -43           | NA              | LINC02109     |
| NR4A2_R848 | chr5    | 33626043  | 33626443  | Promoter (1-2kb)  | 5       | 33603442  | 33624351  | -1692         | ENSG00000151388 | ADAMTS12      |
| NR4A2_R848 | chr5    | 34190697  | 34191097  | Promoter (<=1kb)  | 5       | 34190056  | 34193653  | 641           | NA              | LOC646652     |
| NR4A2_R848 | chr5    | 34192129  | 34192529  | Promoter (2-3kb)  | 5       | 34190056  | 34193653  | 2073          | NA              | LOC646652     |
| NR4A2_R848 | chr5    | 61731361  | 61731761  | Promoter (3-4kb)  | 5       | 61732774  | 61735668  | 3907          | ENSG00000251575 | C5orf64-AS1   |
| NR4A2_R848 | chr5    | 113108161 | 113108561 | Promoter (3-4kb)  | 5       | 113101543 | 113104625 | -3536         | ENSG00000171444 | MCC           |
| NR4A2_R848 | chr5    | 119629918 | 119630318 | Promoter (<=1kb)  | 5       | 119629686 | 119635082 | 232           | ENSG00000164334 | FAM170A       |
| NR4A2_R848 | chr5    | 122477714 | 122478114 | Promoter (<=1kb)  | 5       | 122454248 | 122478881 | 767           | ENSG00000250328 | MGC32805      |
| NR4A2_R848 | chr5    | 126589876 | 126590276 | Promoter (3-4kb)  | 5       | 126591928 | 126594138 | 3862          | ENSG00000164904 | ALDH7A1       |
| NR4A2_R848 | chr5    | 131987311 | 131987711 | Promoter (<=1kb)  | 5       | 131981859 | 131988090 | 379           | ENSG00000164398 | ACSL6         |
| NR4A2_R848 | chr5    | 133244751 | 133245151 | Promoter (7-8kb)  | 5       | 133220773 | 133252264 | 7113          | ENSG00000053108 | FSTL4         |
| NR4A2_R848 | chr5    | 133254358 | 133254758 | Promoter (2-3kb)  | 5       | 133220773 | 133252264 | -2094         | ENSG00000053108 | FSTL4         |
| NR4A2_R848 | chr5    | 134615790 | 134616190 | Promoter (<=1kb)  | 5       | 134606430 | 134614903 | -887          | ENSG00000152700 | SAR1B         |
| NR4A2_R848 | chr5    | 134629381 | 134629781 | Promoter (2-3kb)  | 5       | 134607037 | 134632769 | 2988          | ENSG00000152700 | SAR1B         |
| NR4A2_R848 | chr5    | 134745258 | 134745658 | Promoter (6-7kb)  | 5       | 134738583 | 134751377 | 6675          | ENSG00000164615 | CAMLG         |
| NR4A2_R848 | chr5    | 138326887 | 138327287 | Promoter (1-2kb)  | 5       | 138325918 | 138328882 | 1595          | ENSG00000158402 | CDC25C        |
| NR4A2_R848 | chr5    | 138433016 | 138433416 | Promoter (5-6kb)  | 5       | 138439057 | 138446965 | -5641         | ENSG00000132563 | REEP2         |
| NR4A2_R848 | chr5    | 147873075 | 147873475 | Promoter (1-2kb)  | 5       | 147872018 | 147882191 | 1057          | ENSG00000164265 | SCGB3A2       |
| NR4A2_R848 | chr5    | 150475803 | 150476203 | Promoter (9-10kb) | 5       | 150485818 | 150521458 | -9615         | ENSG00000070614 | NDST1         |
| NR4A2_R848 | chr5    | 150501955 | 150502355 | Promoter (4-5kb)  | 5       | 150497927 | 150521323 | 4028          | ENSG00000070614 | NDST1         |
| NR4A2_R848 | chr5    | 171378615 | 171379015 | Promoter (7-8kb)  | 5       | 171386656 | 171386760 | 7745          | ENSG00000264249 | MIR3912       |
| NR4A2_R848 | chr5    | 172089338 | 172089738 | Promoter (3-4kb)  | 5       | 172092428 | 172093577 | 3839          | ENSG00000072786 | STK10         |
| NR4A2_R848 | chr5    | 172098786 | 172099186 | Promoter (5-6kb)  | 5       | 172092428 | 172093577 | -5209         | ENSG00000072786 | STK10         |
| NR4A2_R848 | chr5    | 174097483 | 174097883 | Promoter (6-7kb)  | 5       | 174091205 | 174108346 | 6278          | ENSG00000170091 | NSG2          |
| NR4A2_R848 | chr5    | 176132652 | 176133052 | Promoter (8-9kb)  | 5       | 176123834 | 176125138 | 8818          | NA              | NA            |
| NR4A2_R848 | chr5    | 176588281 | 176588681 | Promoter (1-2kb)  | 5       | 176586659 | 176589570 | 1622          | ENSG00000074276 | CDHR2         |
| NR4A2_R848 | chr5    | 176591697 | 176592097 | Promoter (1-2kb)  | 5       | 176590601 | 176591690 | 1096          | ENSG00000074276 | CDHR2         |
| NR4A2_R848 | chr5    | 177096828 | 177097228 | Promoter (<=1kb)  | 5       | 177097191 | 177097764 | 0             | ENSG00000160867 | FGFR4         |
| NR4A2_R848 | chr5    | 177101189 | 177101589 | Promoter (3-4kb)  | 5       | 177097191 | 177097764 | 3998          | ENSG00000160867 | FGFR4         |
| NR4A2_R848 | chr5    | 178269363 | 178269763 | Promoter (3-4kb)  | 5       | 178263208 | 178265834 | -3529         | ENSG00000050767 | COL23A1       |
| NR4A2_R848 | chr5    | 178945182 | 178945582 | Promoter (2-3kb)  | 5       | 178942428 | 178948116 | 2754          | ENSG00000178187 | ZNF454        |
| NR4A2_R848 | chr6    | 302372    | 302772    | Promoter (9-10kb) | 6       | 292540    | 350950    | 9832          | ENSG00000112679 | DUSP22        |
| NR4A2_R848 | chr6    | 2907164   | 2907564   | Promoter (3-4kb)  | 6       | 2887270   | 2903309   | -3855         | ENSG00000170542 | SERPINB9      |
| NR4A2_R848 | chr6    | 5999541   | 5999941   | Promoter (3-4kb)  | 6       | 5998715   | 6002963   | 3022          | ENSG00000124785 | NRN1          |
| NR4A2_R848 | chr6    | 21980430  | 21980830  | Promoter (1-2kb)  | 6       | 21978973  | 22194227  | 1457          | NA              | CASC15        |
| NR4A2_R848 | chr6    | 33803458  | 33803858  | Promoter (<=1kb)  | 6       | 33794787  | 33803980  | 122           | ENSG00000096395 | MLN           |
| NR4A2_R848 | chr6    | 34008024  | 34008424  | Promoter (7-8kb)  | 6       | 33999972  | 34000051  | -7973         | ENSG00000221697 | MIR1275       |
| NR4A2_R848 | chr6    | 34071766  | 34072166  | Promoter (8-9kb)  | 6       | 34022138  | 34063635  | -8131         | ENSG00000124493 | GRM4          |
| NR4A2_R848 | chr6    | 34072835  | 34073260  | Promoter (9-10kb) | 6       | 34022138  | 34063635  | -9200         | ENSG00000124493 | GRM4          |
| NR4A2_R848 | chr6    | 34457783  | 34458183  | Promoter (7-8kb)  | 6       | 34466061  | 34535221  | -7878         | ENSG00000124507 | PACSIN1       |
| NR4A2_R848 | chr6    | 34517376  | 34517776  | Promoter (2-3kb)  | 6       | 34514890  | 34527694  | 2486          | ENSG00000124507 | PACSIN1       |
| NR4A2_R848 | chr6    | 35056247  | 35056647  | Promoter (1-2kb)  | 6       | 35058248  | 35081053  | -1601         | ENSG00000064999 | ANKS1A        |
| NR4A2_R848 | chr6    | 35292064  | 35292464  | Promoter (<=1kb)  | 6       | 35292323  | 352945    |               |                 |               |



| Condition  | peakChr | peakStart | peakEnd   | annotation        | geneChr | geneStart | geneEnd   | distanceToTSS | geneID          | geneSymbol   |
|------------|---------|-----------|-----------|-------------------|---------|-----------|-----------|---------------|-----------------|--------------|
| NR4A2_R848 | chr6    | 160668682 | 160669082 | Promoter (4-5kb)  | 6       | 160531483 | 160664259 | -4423         | ENSG00000198670 | LPA          |
| NR4A2_R848 | chr6    | 166507210 | 166507610 | Promoter (1-2kb)  | 6       | 166509354 | 166509433 | 1823          | ENSG00000222958 | MIR1913      |
| NR4A2_R848 | chr6    | 166900772 | 166901172 | Promoter (2-3kb)  | 6       | 166903698 | 166904835 | -2526         | NA              | RPS6KA2-AS1  |
| NR4A2_R848 | chr6    | 167671822 | 167672222 | Promoter (7-8kb)  | 6       | 167666840 | 167679270 | 7048          | ENSG00000272549 | LINC02538    |
| NR4A2_R848 | chr6    | 168043810 | 168044210 | Promoter (8-9kb)  | 6       | 168035488 | 168038670 | 8322          | ENSG00000125337 | KIF25        |
| NR4A2_R848 | chr6    | 168070002 | 168070402 | Promoter (2-3kb)  | 6       | 168056989 | 168067523 | -2479         | ENSG00000153303 | FRMD1        |
| NR4A2_R848 | chr6    | 168243473 | 168243873 | Promoter (<=1kb)  | 6       | 168243014 | 168259700 | 459           | ENSG00000234647 | LOC101929420 |
| NR4A2_R848 | chr6    | 168659453 | 168659936 | Promoter (6-7kb)  | 6       | 168653203 | 168673445 | 6250          | ENSG00000112562 | SMOC2        |
| NR4A2_R848 | chr6    | 169167411 | 169167811 | Promoter (4-5kb)  | 6       | 169157207 | 169162992 | -4419         | ENSG00000223485 | LINC01615    |
| NR4A2_R848 | chr6    | 169218919 | 169219319 | Promoter (4-5kb)  | 6       | 169217454 | 169223440 | 4121          | ENSG00000186340 | THBS2        |
| NR4A2_R848 | chr6    | 169233241 | 169233641 | Promoter (3-4kb)  | 6       | 169234510 | 169237412 | 3771          | ENSG00000186340 | THBS2        |
| NR4A2_R848 | chr6    | 169233802 | 169234202 | Promoter (3-4kb)  | 6       | 169234510 | 169237412 | 3210          | ENSG00000186340 | THBS2        |
| NR4A2_R848 | chr6    | 169650015 | 169650762 | Promoter (<=1kb)  | 6       | 169457212 | 169649233 | -782          | ENSG00000184465 | WDR27        |
| NR4A2_R848 | chr7    | 566348    | 566748    | Promoter (4-5kb)  | 7       | 561958    | 565619    | 4390          | ENSG00000229380 | PRKAR1B-AS2  |
| NR4A2_R848 | chr7    | 767915    | 768315    | Promoter (<=1kb)  | 7       | 768475    | 786044    | -160          | ENSG00000164818 | DNAAF5       |
| NR4A2_R848 | chr7    | 784199    | 784599    | Promoter (4-5kb)  | 7       | 779904    | 785573    | 4295          | ENSG00000164818 | DNAAF5       |
| NR4A2_R848 | chr7    | 889176    | 889576    | Promoter (1-2kb)  | 7       | 887486    | 892474    | 1690          | ENSG00000239857 | GET4         |
| NR4A2_R848 | chr7    | 989577    | 989977    | Promoter (2-3kb)  | 7       | 986657    | 988804    | 2920          | ENSG00000073067 | CYP2W1       |
| NR4A2_R848 | chr7    | 1015968   | 1016368   | Promoter (6-7kb)  | 7       | 1022933   | 1023026   | 6658          | ENSG00000199023 | MIR339       |
| NR4A2_R848 | chr7    | 1032176   | 1032576   | Promoter (3-4kb)  | 7       | 1024502   | 1028352   | -3824         | ENSG00000146540 | C7orf50      |
| NR4A2_R848 | chr7    | 1438929   | 1439329   | Promoter (<=1kb)  | 7       | 1434366   | 1438962   | 0             | ENSG00000164877 | MICALL2      |
| NR4A2_R848 | chr7    | 1483516   | 1483916   | Promoter (7-8kb)  | 7       | 1474200   | 1476150   | -7366         | ENSG00000164880 | INTS1        |
| NR4A2_R848 | chr7    | 1541266   | 1541666   | Promoter (2-3kb)  | 7       | 1538708   | 1540373   | 2558          | ENSG00000198517 | MAFK         |
| NR4A2_R848 | chr7    | 1606953   | 1607353   | Promoter (7-8kb)  | 7       | 1614590   | 1615325   | -7237         | NA              | TFAMP1       |
| NR4A2_R848 | chr7    | 1618413   | 1618813   | Promoter (3-4kb)  | 7       | 1614590   | 1615325   | 3823          | NA              | TFAMP1       |
| NR4A2_R848 | chr7    | 1689991   | 1690835   | Promoter (1-2kb)  | 7       | 1688119   | 1747954   | 1872          | ENSG00000225968 | ELFN1        |
| NR4A2_R848 | chr7    | 1938895   | 1939295   | Promoter (1-2kb)  | 7       | 1898200   | 1940549   | 1254          | ENSG00000002822 | MAD1L1       |
| NR4A2_R848 | chr7    | 2102150   | 2102550   | Promoter (5-6kb)  | 7       | 2014506   | 2107708   | 5158          | ENSG00000002822 | MAD1L1       |
| NR4A2_R848 | chr7    | 2252679   | 2253079   | Promoter (3-4kb)  | 7       | 2249285   | 2251146   | 3394          | ENSG00000106268 | NUDT1        |
| NR4A2_R848 | chr7    | 2272008   | 2272408   | Promoter (<=1kb)  | 7       | 2257666   | 2271896   | -112          | ENSG00000106266 | SNX8         |
| NR4A2_R848 | chr7    | 2379473   | 2379873   | Promoter (<=1kb)  | 7       | 2378687   | 2379841   | 786           | ENSG00000106263 | EIF3B        |
| NR4A2_R848 | chr7    | 2514440   | 2514840   | Promoter (1-2kb)  | 7       | 2512529   | 2528427   | 1911          | ENSG00000106003 | LFNG         |
| NR4A2_R848 | chr7    | 2514914   | 2515314   | Promoter (2-3kb)  | 7       | 2512529   | 2528427   | 2385          | ENSG00000106003 | LFNG         |
| NR4A2_R848 | chr7    | 2912804   | 2913204   | Promoter (9-10kb) | 7       | 2917290   | 2923040   | 9836          | ENSG00000198286 | CARD11       |
| NR4A2_R848 | chr7    | 2917771   | 2918171   | Promoter (4-5kb)  | 7       | 2917290   | 2923040   | 4869          | ENSG00000198286 | CARD11       |
| NR4A2_R848 | chr7    | 4125027   | 4125630   | Promoter (4-5kb)  | 7       | 4129685   | 4269000   | -4055         | ENSG00000146555 | SDK1         |
| NR4A2_R848 | chr7    | 4230098   | 4230696   | Promoter (2-3kb)  | 7       | 4232887   | 4237671   | -2191         | ENSG00000146555 | SDK1         |
| NR4A2_R848 | chr7    | 4807459   | 4808031   | Promoter (3-4kb)  | 7       | 4799105   | 4804068   | -3391         | ENSG00000157927 | RADIL        |
| NR4A2_R848 | chr7    | 5311629   | 5312029   | Promoter (8-9kb)  | 7       | 5313111   | 5320607   | 8578          | ENSG00000182095 | TNRC18       |
| NR4A2_R848 | chr7    | 5497866   | 5498266   | Promoter (1-2kb)  | 7       | 5495819   | 5495917   | -1949         | ENSG00000207973 | MIR589       |
| NR4A2_R848 | chr7    | 8152559   | 8152959   | Promoter (4-5kb)  | 7       | 8141765   | 8157764   | 4805          | ENSG00000003147 | ICA1         |
| NR4A2_R848 | chr7    | 23321675  | 23322075  | Promoter (3-4kb)  | 7       | 23312373  | 23317833  | -3842         | ENSG00000136231 | IGF2BP3      |
| NR4A2_R848 | chr7    | 26177054  | 26177454  | Promoter (<=1kb)  | 7       | 26178003  | 26183874  | -549          | ENSG00000050344 | NFE2L3       |
| NR4A2_R848 | chr7    | 26642328  | 26642728  | Promoter (3-4kb)  | 7       | 26638457  | 26647305  | 3871          | ENSG00000222004 | LINC02860    |
| NR4A2_R848 | chr7    | 29649171  | 29649571  | Promoter (<=1kb)  | 7       | 29650227  | 29742594  | -656          | ENSG00000227855 | DPY19L2P3    |
| NR4A2_R848 | chr7    | 30754259  | 30754659  | Promoter (2-3kb)  | 7       | 30752153  | 30791179  | 2106          | ENSG00000254959 | INMT-MINDY4  |
| NR4A2_R848 | chr7    | 31077513  | 31077913  | Promoter (9-10kb) | 7       | 31086971  | 31104899  | -9058         | ENSG00000078549 | ADCYAP1R1    |
| NR4A2_R848 | chr7    | 36515699  | 36516099  | Promoter (1-2kb)  | 7       | 36513002  | 36514676  | -1023         | ENSG00000136250 | AOAH         |
| NR4A2_R848 | chr7    | 37847634  | 37848034  | Promoter (<=1kb)  | 7       | 37848597  | 37900397  | -563          | ENSG00000086288 | NME8         |
| NR4A2_R848 | chr7    | 43247674  | 43248074  | Promoter (1-2kb)  | 7       | 43249137  | 43311993  | -1063         | ENSG00000002746 | HECW1        |
| NR4A2_R848 | chr7    | 44184832  | 44185232  | Promoter (3-4kb)  | 7       | 44145132  | 44188987  | 3755          | ENSG00000106633 | GCK          |
| NR4A2_R848 | chr7    | 44254434  | 44254965  | Promoter (4-5kb)  | 7       | 44243251  | 44259581  | 4616          | ENSG00000058404 | CAMK2B       |
| NR4A2_R848 | chr7    | 50713348  | 50713814  | Promoter (8-9kb)  | 7       | 50590063  | 50705301  | -8047         | ENSG00000106070 | GRB10        |
| NR4A2_R848 | chr7    | 54545239  | 54545995  | Promoter (<=1kb)  | 7       | 54546161  | 54569489  | -166          | ENSG00000170419 | VSTM2A       |
| NR4A2_R848 | chr7    | 56081397  | 56081797  | Promoter (4-5kb)  | 7       | 56076603  | 56079747  | 4794          | ENSG00000129103 | SUMF2        |
| NR4A2_R848 | chr7    | 56091762  | 56092162  | Promoter (<=1kb)  | 7       | 56081717  | 56092932  | 770           | ENSG00000164776 | PHKG1        |
| NR4A2_R848 | chr7    | 57181985  | 57182385  | Promoter (1-2kb)  | 7       | 57177409  | 57180052  | -1933         | NA              | GUSBP10      |
| NR4A2_R848 | chr7    | 57182954  | 57183354  | Promoter (2-3kb)  | 7       | 57177409  | 57180052  | -2902         | NA              | GUSBP10      |
| NR4A2_R848 | chr7    | 57218243  | 57218643  | Promoter (3-4kb)  | 7       | 57209865  | 57222159  | 3516          | ENSG00000234089 | LOC105375297 |
| NR4A2_R848 | chr7    | 64230164  | 64230564  | Promoter (1-2kb)  | 7       | 64228474  | 64266931  | 1690          | ENSG00000197123 | ZNF679       |
| NR4A2_R848 | chr7    | 64577010  | 64577410  | Promoter (5-6kb)  | 7       | 64582733  | 64583207  | -5323         | NA              | LOC641746    |
| NR4A2_R848 | chr7    | 73428172  | 73428673  | Promoter (5-6kb)  | 7       | 73433778  | 73436120  | -5105         | ENSG00000188763 | FZD9         |
| NR4A2_R848 | chr7    | 73597549  | 73597949  | Promoter (<=1kb)  | 7       | 73596174  | 73597362  | -187          | ENSG00000009950 | MLXIPL       |
| NR4A2_R848 | chr7    | 73762463  | 73762863  | Promoter (7-8kb)  | 7       | 73768997  | 73770270  | 7407          | ENSG00000165215 | CLDN3        |
| NR4A2_R848 | chr7    | 73867073  | 73867473  | Promoter (5-6kb)  | 7       | 73861172  | 73865890  | 5901          | ENSG00000175877 | TMEM270      |
| NR4A2_R848 | chr7    | 74049259  | 74049659  | Promoter (2-3kb)  | 7       | 74046659  | 74052236  | 2600          | ENSG00000049540 | ELN          |
| NR4A2_R848 | chr7    | 74112840  | 74113240  | Promoter (2-3kb)  | 7       | 74115368  | 74121029  | -2128         | ENSG00000106683 | LIMK1        |
| NR4A2_R848 | chr7    | 74496325  | 74496725  | Promoter (9-10kb) | 7       | 74505992  | 74602591  | -9267         | ENSG00000006704 | GTF2IRD1     |
| NR4A2_R848 | chr7    | 74517065  | 74517465  | Promoter (8-9kb)  | 7       | 74508075  | 74559660  | 8990          | ENSG00000006704 | GTF2IRD1     |
| NR4A2_R848 | chr7    | 76258978  | 76259378  | Promoter (6-7kb)  | 7       | 76265407  | 76269992  | -6029         | ENSG00000177679 | SRRM3        |
| NR4A2_R848 | chr7    | 76298615  | 76299015  | Promoter (3-4kb)  | 7       | 76302673  | 76304292  | -3658         | ENSG00000106211 | HSPB1        |
| NR4A2_R848 | chr7    | 83460640  | 83461040  | Promoter (1-2kb)  | 7       | 83407140  | 83462160  | 1120          | ENSG00000170381 | SEMA3E       |
| NR4A2_R848 | chr7    | 87209423  | 87209823  | Promoter (6-7kb)  | 7       | 87197718  | 87203043  | -6380         | ENSG00000135185 | TMEM243      |
| NR4A2_R848 | chr7    | 99823076  | 99823476  | Promoter (4-5kb)  | 7       | 99828013  | 99839420  | -4537         | ENSG00000021461 | CYP3A43      |
| NR4A2_R848 | chr7    | 100245460 | 100245860 | Promoter (<=1kb)  | 7       | 100222645 | 100246548 | 688           | ENSG00000239521 | CASTOR3      |
| NR4A2_R848 | chr7    | 100459361 | 100459761 | Promoter (4-5kb)  | 7       | 100456924 | 100463873 | 4112          | ENSG00000185955 | C7orf61      |
| NR4A2_R848 | chr7    | 100650120 | 100650520 | Promoter (2-3kb)  | 7       | 100643142 | 100647738 | -2382         | ENSG00000077080 | ACTL6B       |
| NR4A2_R848 | chr7    | 100861949 | 100862349 | Promoter (<=1kb)  | 7       | 100861520 | 100865555 | 429           | ENSG00000146828 | SLC12A9      |
| NR4A2_R848 | chr7    | 100952915 | 100953315 | Promoter (3-4kb)  | 7       | 100949625 | 100967308 | 3290          | ENSG00000169894 | MUC3A        |
| NR4A2_R848 | chr7    | 100958480 | 100958969 | Promoter (<=1kb)  | 7       | 100957965 | 100967890 | 515           | ENSG00000169894 | MUC3A        |
| NR4A2_R848 | chr7    | 101210973 | 101211373 | Promoter (<=1kb)  | 7       | 101210356 | 101211103 | 0             | ENSG00000106397 | PLOD3        |
| NR4A2_R848 | chr7    | 101231036 | 101231436 | Promoter (6-7kb)  | 7       | 101232405 | 101237477 | 6041          | ENSG00000106404 | CLDN15       |
| NR4A2_R848 | chr7    | 101636063 | 101636463 | Promoter (6-7kb)  | 7       | 101613330 | 101629296 | -6767         | ENSG00000106436 | MYL10        |
| NR4A2_R848 | chr7    | 101637371 | 101637771 | Promoter (8-9kb)  | 7       | 101613330 | 101629296 | -8075         | ENSG00000106436 | MYL10        |
| NR4A2_R848 | chr7    | 102281763 | 102282163 | Promoter (2-3kb)  | 7       | 102285091 | 102314547 | -2928         | ENSG00000160999 | SH2B2        |
| NR4A2_R848 | chr7    | 107888026 | 107888426 | Promoter (2-3kb)  | 7       | 107891162 | 107893554 | -2736         | ENSG00000091140 | DLD          |
| NR4A2_R848 | chr7    | 128464516 | 128464916 | Promoter (8-9kb)  | 7       | 128455937 | 128469197 | 8579          | ENSG00000135245 | HILPDA       |
| NR4A2_R848 | chr7    | 128887391 | 128887791 | Promoter (6-7kb)  | 7       | 128862451 | 128880923 | -6468         | ENSG00000135253 | KCP          |
| NR4A2_R848 | chr7    | 128888115 | 128888515 | Promoter (7-8kb)  | 7       | 128862451 | 128880923 | -7192         | ENSG00000135253 | KCP          |
| NR4A2_R848 | chr7    | 130055518 | 130055918 | Promoter (4-5kb)  | 7       | 130018287 | 130051451 | -4067         | ENSG00000091732 | ZC3HC1       |
| NR4A2_R848 | chr7    | 130532155 | 130532555 | Promoter (6-7kb)  | 7       | 130538954 | 130546900 | -6399         | NA              | COPG2IT1     |
| NR4A2_R848 | chr7    | 135698397 | 135698797 | Promoter (7-8kb)  | 7       | 135699364 | 135705807 | 7010          | ENSG00000164707 | SLC13A4      |
| NR4A2_R848 | chr7    | 138632208 | 138632608 | Promoter (4-5kb)  | 7       | 138594437 | 138627444 | -4764         | ENSG00000157703 | SVOPL        |
| NR4A2_R848 | chr7    | 149801025 | 149801425 | Promoter (9-10kb) | 7       | 149810915 | 149812635 | -9490         | ENSG00000197558 | SSPOP        |
| NR4A2_R848 | chr7    | 151121758 | 151       |                   |         |           |           |               |                 |              |

| Condition  | peakChr | peakStart | peakEnd   | annotation        | geneChr | geneStart | geneEnd   | distanceToTSS | geneID          | geneSymbol |
|------------|---------|-----------|-----------|-------------------|---------|-----------|-----------|---------------|-----------------|------------|
| NR4A2_R848 | chr8    | 26566936  | 26567336  | Promoter (9-10kb) | 8       | 26577062  | 26583965  | -9726         | ENSG00000092964 | DPYSL2     |
| NR4A2_R848 | chr8    | 27265759  | 27266159  | Promoter (7-8kb)  | 8       | 27236475  | 27258420  | -7339         | ENSG00000015592 | STMN4      |
| NR4A2_R848 | chr8    | 37518334  | 37518734  | Promoter (<=1kb)  | 8       | 37516407  | 37517728  | -606          | ENSG00000253414 | LINC01605  |
| NR4A2_R848 | chr8    | 37559335  | 37559868  | Promoter (5-6kb)  | 8       | 37450763  | 37554183  | -5152         | ENSG00000253414 | LINC01605  |
| NR4A2_R848 | chr8    | 37788457  | 37788857  | Promoter (4-5kb)  | 8       | 37784191  | 37829993  | 4266          | ENSG00000020181 | ADGRA2     |
| NR4A2_R848 | chr8    | 38292459  | 38292859  | Promoter (1-2kb)  | 8       | 38289421  | 38290748  | -1711         | ENSG00000147548 | NSD3       |
| NR4A2_R848 | chr8    | 43205773  | 43206173  | Promoter (9-10kb) | 8       | 43196168  | 43199858  | 9605          | ENSG00000165102 | HGSNAT     |
| NR4A2_R848 | chr8    | 54124924  | 54125324  | Promoter (9-10kb) | 8       | 54135241  | 54148514  | -9917         | ENSG00000137547 | MRPL15     |
| NR4A2_R848 | chr8    | 65662616  | 65663016  | Promoter (6-7kb)  | 8       | 65669871  | 65707976  | -6855         | ENSG00000066855 | MTFR1      |
| NR4A2_R848 | chr8    | 72241591  | 72241991  | Promoter (9-10kb) | 8       | 72202751  | 72251565  | 9574          | NA              | LOC392232  |
| NR4A2_R848 | chr8    | 85663627  | 85664027  | Promoter (<=1kb)  | 8       | 85661524  | 85663497  | -130          | ENSG00000277422 | REXO1L2P   |
| NR4A2_R848 | chr8    | 85714395  | 85714813  | Promoter (<=1kb)  | 8       | 85714922  | 85715833  | -109          | ENSG00000277422 | REXO1L2P   |
| NR4A2_R848 | chr8    | 96288713  | 96289113  | Promoter (5-6kb)  | 8       | 96283597  | 96304157  | 5116          | ENSG00000156471 | PTDSS1     |
| NR4A2_R848 | chr8    | 101049121 | 101049521 | Promoter (<=1kb)  | 8       | 101050342 | 101076215 | -821          | ENSG00000248599 | FLJ42969   |
| NR4A2_R848 | chr8    | 125422495 | 125422895 | Promoter (7-8kb)  | 8       | 125430358 | 125438403 | -7463         | ENSG00000173334 | TRIB1      |
| NR4A2_R848 | chr8    | 132187545 | 132187945 | Promoter (<=1kb)  | 8       | 132120859 | 132187213 | -332          | ENSG00000184156 | KCNQ3      |
| NR4A2_R848 | chr8    | 132673897 | 132674297 | Promoter (1-2kb)  | 8       | 132638052 | 132675525 | 1228          | ENSG00000129295 | LRRC6      |
| NR4A2_R848 | chr8    | 134695593 | 134695993 | Promoter (<=1kb)  | 8       | 134477788 | 134696554 | 561           | ENSG00000066827 | ZFAT       |
| NR4A2_R848 | chr8    | 138882329 | 138882729 | Promoter (<=1kb)  | 8       | 138588897 | 138883211 | 482           | ENSG00000169436 | COL22A1    |
| NR4A2_R848 | chr8    | 139696690 | 139697439 | Promoter (5-6kb)  | 8       | 139600839 | 139702956 | 5517          | ENSG00000169427 | KCNK9      |
| NR4A2_R848 | chr8    | 139804469 | 139804869 | Promoter (1-2kb)  | 8       | 139731006 | 139806233 | 1364          | ENSG00000167632 | TRAPPC9    |
| NR4A2_R848 | chr8    | 139871847 | 139872675 | Promoter (8-9kb)  | 8       | 139730996 | 139881295 | 8620          | ENSG00000167632 | TRAPPC9    |
| NR4A2_R848 | chr8    | 141488169 | 141488569 | Promoter (8-9kb)  | 8       | 141494911 | 141496759 | 8190          | ENSG00000226807 | MROH5      |
| NR4A2_R848 | chr8    | 141515021 | 141515523 | Promoter (7-8kb)  | 8       | 141433832 | 141507230 | -7791         | ENSG00000226807 | MROH5      |
| NR4A2_R848 | chr8    | 142190658 | 142191058 | Promoter (7-8kb)  | 8       | 142198356 | 142209003 | -7298         | ENSG00000254008 | LINC00051  |
| NR4A2_R848 | chr8    | 142192650 | 142193050 | Promoter (5-6kb)  | 8       | 142198356 | 142209003 | -5306         | ENSG00000254008 | LINC00051  |
| NR4A2_R848 | chr8    | 142271916 | 142272575 | Promoter (7-8kb)  | 8       | 142271567 | 142279997 | 7422          | ENSG00000171045 | TSNARE1    |
| NR4A2_R848 | chr8    | 142284987 | 142285387 | Promoter (4-5kb)  | 8       | 142271567 | 142279997 | -4990         | ENSG00000171045 | TSNARE1    |
| NR4A2_R848 | chr8    | 142396744 | 142397144 | Promoter (5-6kb)  | 8       | 142344260 | 142402888 | 5744          | ENSG00000171045 | TSNARE1    |
| NR4A2_R848 | chr8    | 142398349 | 142398749 | Promoter (4-5kb)  | 8       | 142344260 | 142402888 | 4139          | ENSG00000171045 | TSNARE1    |
| NR4A2_R848 | chr8    | 142413140 | 142413540 | Promoter (9-10kb) | 8       | 142344353 | 142403182 | -9958         | ENSG00000171045 | TSNARE1    |
| NR4A2_R848 | chr8    | 142469045 | 142469445 | Promoter (5-6kb)  | 8       | 142464016 | 142545006 | 5029          | ENSG00000181790 | ADGRB1     |
| NR4A2_R848 | chr8    | 142547832 | 142548232 | Promoter (4-5kb)  | 8       | 142543501 | 142544684 | 4331          | ENSG00000181790 | ADGRB1     |
| NR4A2_R848 | chr8    | 142743877 | 142744277 | Promoter (1-2kb)  | 8       | 142740949 | 142742406 | -1471         | ENSG00000126233 | SLURP1     |
| NR4A2_R848 | chr8    | 142744640 | 142745040 | Promoter (2-3kb)  | 8       | 142740949 | 142742406 | -2234         | ENSG00000126233 | SLURP1     |
| NR4A2_R848 | chr8    | 142791367 | 142791769 | Promoter (4-5kb)  | 8       | 142784882 | 142786539 | -4828         | ENSG00000167656 | LY6D       |
| NR4A2_R848 | chr8    | 143313590 | 143313990 | Promoter (1-2kb)  | 8       | 143304384 | 143315807 | 1817          | ENSG00000184428 | TOP1MT     |
| NR4A2_R848 | chr8    | 143410679 | 143411095 | Promoter (6-7kb)  | 8       | 143417679 | 143419150 | -6584         | ENSG00000254338 | MAFA-AS1   |
| NR4A2_R848 | chr8    | 143981708 | 143982217 | Promoter (2-3kb)  | 8       | 143977153 | 143984358 | 2141          | ENSG00000178685 | PARP10     |
| NR4A2_R848 | chr8    | 144066064 | 144066464 | Promoter (2-3kb)  | 8       | 144058887 | 144063965 | -2099         | ENSG00000178814 | OPLAH      |
| NR4A2_R848 | chr8    | 144453619 | 144454019 | Promoter (3-4kb)  | 8       | 144449582 | 144457641 | 3622          | ENSG00000187954 | CYHR1      |
| NR4A2_R848 | chr9    | 22440015  | 22440415  | Promoter (6-7kb)  | 9       | 22446824  | 22455740  | -6409         | ENSG00000176399 | DMRTA1     |
| NR4A2_R848 | chr9    | 38629409  | 38629809  | Promoter (8-9kb)  | 9       | 38621088  | 38624990  | 8321          | NA              | FAM201A    |
| NR4A2_R848 | chr9    | 41229417  | 41230068  | Promoter (3-4kb)  | 9       | 41233755  | 41233835  | -3687         | ENSG00000276029 | MIR4477A   |
| NR4A2_R848 | chr9    | 61856412  | 61857145  | Promoter (2-3kb)  | 9       | 61854216  | 62076341  | 2196          | ENSG00000231527 | FAM27C     |
| NR4A2_R848 | chr9    | 62799318  | 62799830  | Promoter (1-2kb)  | 9       | 62801461  | 62810186  | -1631         | ENSG00000238113 | LINC01410  |
| NR4A2_R848 | chr9    | 62801224  | 62801624  | Promoter (<=1kb)  | 9       | 62801461  | 62810186  | 0             | ENSG00000238113 | LINC01410  |
| NR4A2_R848 | chr9    | 63817670  | 63818070  | Promoter (1-2kb)  | 9       | 63819574  | 63819654  | -1504         | ENSG00000266017 | MIR4477B   |
| NR4A2_R848 | chr9    | 63823317  | 63823745  | Promoter (3-4kb)  | 9       | 63819574  | 63819654  | 3743          | ENSG00000266017 | MIR4477B   |
| NR4A2_R848 | chr9    | 87869473  | 87869873  | Promoter (9-10kb) | 9       | 87858103  | 87859599  | -9874         | NA              | LOC392364  |
| NR4A2_R848 | chr9    | 89364348  | 89364748  | Promoter (<=1kb)  | 9       | 89361601  | 89364651  | 0             | ENSG00000187764 | SEMA4D     |
| NR4A2_R848 | chr9    | 92162019  | 92162419  | Promoter (9-10kb) | 9       | 92152594  | 92158488  | 9425          | NA              | LINC00475  |
| NR4A2_R848 | chr9    | 92803880  | 92804403  | Promoter (4-5kb)  | 9       | 92809388  | 92888693  | -4985         | ENSG00000187984 | ANKRD19P   |
| NR4A2_R848 | chr9    | 93295512  | 93296240  | Promoter (2-3kb)  | 9       | 93293133  | 93300326  | 2379          | ENSG00000165238 | WNK2       |
| NR4A2_R848 | chr9    | 93296614  | 93297014  | Promoter (3-4kb)  | 9       | 93293133  | 93300326  | 3481          | ENSG00000165238 | WNK2       |
| NR4A2_R848 | chr9    | 93587606  | 93588006  | Promoter (6-7kb)  | 9       | 93594841  | 93594894  | -6835         | ENSG00000283146 | MIR548AU   |
| NR4A2_R848 | chr9    | 93818573  | 93818973  | Promoter (<=1kb)  | 9       | 93819357  | 93819421  | -384          | ENSG00000265347 | MIR4291    |
| NR4A2_R848 | chr9    | 94555273  | 94555673  | Promoter (<=1kb)  | 9       | 94555083  | 94570916  | 190           | NA              | PCAT7      |
| NR4A2_R848 | chr9    | 96358634  | 96359034  | Promoter (1-2kb)  | 9       | 96320998  | 96360192  | 1158          | ENSG00000130958 | SLC35D2    |
| NR4A2_R848 | chr9    | 96410638  | 96411038  | Promoter (7-8kb)  | 9       | 96385941  | 96418370  | 7332          | ENSG00000165244 | ZNF367     |
| NR4A2_R848 | chr9    | 97221976  | 97222376  | Promoter (<=1kb)  | 9       | 97156570  | 97221235  | -741          | NA              | ANKRD18CP  |
| NR4A2_R848 | chr9    | 98392766  | 98393208  | Promoter (3-4kb)  | 9       | 98362555  | 98388887  | -3879         | ENSG00000136928 | GABBR2     |
| NR4A2_R848 | chr9    | 114165876 | 114166561 | Promoter (1-2kb)  | 9       | 114167715 | 114218579 | -1154         | ENSG00000196739 | COL27A1    |
| NR4A2_R848 | chr9    | 114250127 | 114250527 | Promoter (9-10kb) | 9       | 114240220 | 114246121 | 9907          | ENSG00000196739 | COL27A1    |
| NR4A2_R848 | chr9    | 114278296 | 114278696 | Promoter (9-10kb) | 9       | 114268807 | 114274230 | 9489          | ENSG00000196739 | COL27A1    |
| NR4A2_R848 | chr9    | 114301815 | 114302215 | Promoter (1-2kb)  | 9       | 114300362 | 114301542 | 1453          | ENSG00000196739 | COL27A1    |
| NR4A2_R848 | chr9    | 115144001 | 115144401 | Promoter (2-3kb)  | 9       | 115141818 | 115402644 | 2183          | ENSG00000173077 | DELEC1     |
| NR4A2_R848 | chr9    | 120382992 | 120383392 | Promoter (6-7kb)  | 9       | 120389195 | 120390277 | 6885          | ENSG00000136861 | CDK5RAP2   |
| NR4A2_R848 | chr9    | 123347332 | 123347732 | Promoter (8-9kb)  | 9       | 123356170 | 123374099 | -8438         | ENSG00000148204 | CRB2       |
| NR4A2_R848 | chr9    | 128301254 | 128301654 | Promoter (9-10kb) | 9       | 128309784 | 128311354 | 9700          | ENSG00000167112 | TRUB2      |
| NR4A2_R848 | chr9    | 128643509 | 128643909 | Promoter (6-7kb)  | 9       | 128635323 | 128637028 | -6481         | ENSG00000119333 | DYNC2I2    |
| NR4A2_R848 | chr9    | 128676797 | 128677197 | Promoter (6-7kb)  | 9       | 128683655 | 128696400 | -6458         | ENSG00000119335 | SET        |
| NR4A2_R848 | chr9    | 130169102 | 130169502 | Promoter (2-3kb)  | 9       | 130172404 | 130237303 | -2902         | ENSG00000107130 | NCS1       |
| NR4A2_R848 | chr9    | 130188515 | 130188915 | Promoter (4-5kb)  | 9       | 130193828 | 130217920 | -4913         | ENSG00000107130 | NCS1       |
| NR4A2_R848 | chr9    | 130299896 | 130300296 | Promoter (7-8kb)  | 9       | 130307519 | 130338606 | -7223         | ENSG00000148357 | HMCN2      |
| NR4A2_R848 | chr9    | 130390576 | 130390976 | Promoter (6-7kb)  | 9       | 130384449 | 130419582 | 6127          | ENSG00000148357 | HMCN2      |
| NR4A2_R848 | chr9    | 130454733 | 130455133 | Promoter (2-3kb)  | 9       | 130452223 | 130471514 | 2510          | ENSG00000130707 | ASS1       |
| NR4A2_R848 | chr9    | 130933383 | 130933783 | Promoter (2-3kb)  | 9       | 130903676 | 130936376 | 2593          | ENSG00000130720 | FIBCD1     |
| NR4A2_R848 | chr9    | 132854713 | 132855113 | Promoter (8-9kb)  | 9       | 132861396 | 132863712 | 8599          | ENSG00000165695 | AK8        |
| NR4A2_R848 | chr9    | 133514899 | 133515299 | Promoter (9-10kb) | 9       | 133514586 | 133524959 | 9660          | ENSG00000187616 | MYMK       |
| NR4A2_R848 | chr9    | 133657137 | 133657537 | Promoter (<=1kb)  | 9       | 133654586 | 133657313 | 0             | ENSG00000225756 | DBH-AS1    |
| NR4A2_R848 | chr9    | 133930109 | 133930509 | Promoter (8-9kb)  | 9       | 133925851 | 133939301 | 8792          | ENSG00000160293 | VAV2       |
| NR4A2_R848 | chr9    | 133933673 | 133934073 | Promoter (5-6kb)  | 9       | 133925851 | 133939301 | 5228          | ENSG00000160293 | VAV2       |
| NR4A2_R848 | chr9    | 134847453 | 134847853 | Promoter (1-2kb)  | 9       | 134849298 | 134849369 | 1516          | ENSG00000264744 | MIR3689C   |
| NR4A2_R848 | chr9    | 134870568 | 134870968 | Promoter (9-10kb) | 9       | 134880810 | 134887523 | -9842         | ENSG00000160339 | FCN2       |
| NR4A2_R848 | chr9    | 135069186 | 135069775 | Promoter (5-6kb)  | 9       | 135075422 | 135077391 | -5647         | ENSG00000130558 | OLFM1      |
| NR4A2_R848 | chr9    | 135726759 | 135727209 | Promoter (9-10kb) | 9       | 135736517 | 135793618 | -9308         | ENSG00000107147 | KCNT1      |
| NR4A2_R848 | chr9    | 135752745 | 135753145 | Promoter (<=1kb)  | 9       | 135753751 | 135786399 | -606          | ENSG00000107147 | KCNT1      |
| NR4A2_R848 | chr9    | 135756335 | 135756735 | Promoter (2-3kb)  | 9       | 135753751 | 135786399 | 2584          | ENSG00000107147 | KCNT1      |
| NR4A2_R848 | chr9    | 135758354 | 135758754 | Promoter (4-5kb)  | 9       | 135753751 | 135786399 | 4603          | ENSG00000107147 | KCNT1      |
| NR4A2_R848 | chr9    | 135773956 | 135774708 | Promoter (1-2kb)  | 9       | 135772858 | 135784858 | 1098          | ENSG00000107147 | KCNT1      |
| NR4A2_R848 | chr9    | 135836358 | 135837009 | Promoter (9-10kb) | 9       | 135810423 | 135826409 | -9949         | ENSG00000130559 | CAMSAP1    |
| NR4A2_R848 | chr9    | 1361249   |           |                   |         |           |           |               |                 |            |



| Condition  | peakChr | peakStart | peakEnd   | annotation        | geneChr | geneStart | geneEnd   | distanceToTSS | geneID          | geneSymbol   |
|------------|---------|-----------|-----------|-------------------|---------|-----------|-----------|---------------|-----------------|--------------|
| NR4A2_R848 | chr9    | 137900394 | 137900794 | Promoter (7-8kb)  | 9       | 137867925 | 137892570 | -7824         | ENSG00000203987 | LOC100133077 |
| NR4A2_R848 | chr10   | 81174     | 81574     | Promoter (7-8kb)  | 10      | 46892     | 74163     | -7011         | ENSG00000261456 | TUBB8        |
| NR4A2_R848 | chr10   | 337108    | 337896    | Promoter (7-8kb)  | 10      | 324639    | 329526    | -7582         | ENSG00000151240 | DIP2C        |
| NR4A2_R848 | chr10   | 480218    | 480618    | Promoter (5-6kb)  | 10      | 274190    | 486558    | 5940          | ENSG00000151240 | DIP2C        |
| NR4A2_R848 | chr10   | 624310    | 624710    | Promoter (3-4kb)  | 10      | 628638    | 631255    | -3928         | ENSG00000225140 | LOC101930421 |
| NR4A2_R848 | chr10   | 1010678   | 1011078   | Promoter (1-2kb)  | 10      | 1012400   | 1017197   | -1322         | ENSG00000107937 | GTPBP4       |
| NR4A2_R848 | chr10   | 1157243   | 1157643   | Promoter (2-3kb)  | 10      | 1159768   | 1165112   | -2125         | ENSG00000229205 | LINC00200    |
| NR4A2_R848 | chr10   | 5497428   | 5497828   | Promoter (1-2kb)  | 10      | 5498697   | 5499570   | 1742          | ENSG00000178372 | CALML5       |
| NR4A2_R848 | chr10   | 5497838   | 5498238   | Promoter (1-2kb)  | 10      | 5498697   | 5499570   | 1332          | ENSG00000178372 | CALML5       |
| NR4A2_R848 | chr10   | 14825932  | 14826332  | Promoter (1-2kb)  | 10      | 14819885  | 14828205  | 1873          | ENSG00000185267 | CDNF         |
| NR4A2_R848 | chr10   | 15136073  | 15136473  | Promoter (4-5kb)  | 10      | 15132817  | 15141353  | 4880          | ENSG00000152465 | NMT2         |
| NR4A2_R848 | chr10   | 15149260  | 15149660  | Promoter (5-6kb)  | 10      | 15154802  | 15155320  | 5660          | ENSG00000206448 | PPIAP30      |
| NR4A2_R848 | chr10   | 23010014  | 23010414  | Promoter (3-4kb)  | 10      | 23006735  | 23008374  | 3279          | ENSG00000165309 | ARMC3        |
| NR4A2_R848 | chr10   | 24538212  | 24538612  | Promoter (3-4kb)  | 10      | 24542420  | 24543708  | -3808         | ENSG00000120549 | KIAA1217     |
| NR4A2_R848 | chr10   | 46267412  | 46267812  | Promoter (5-6kb)  | 10      | 46233885  | 46273557  | 5745          | NA              | ANTXRLP1     |
| NR4A2_R848 | chr10   | 46298532  | 46298932  | Promoter (1-2kb)  | 10      | 46297404  | 46310499  | 1128          | ENSG00000274209 | ANTXRL       |
| NR4A2_R848 | chr10   | 47329490  | 47329890  | Promoter (7-8kb)  | 10      | 47322454  | 47327588  | 7036          | ENSG00000263761 | GDF2         |
| NR4A2_R848 | chr10   | 49105214  | 49105614  | Promoter (9-10kb) | 10      | 49102172  | 49115509  | 9895          | ENSG00000165633 | VSTM4        |
| NR4A2_R848 | chr10   | 49621756  | 49622156  | Promoter (5-6kb)  | 10      | 49615757  | 49619856  | 5999          | ENSG00000070748 | CHAT         |
| NR4A2_R848 | chr10   | 49741728  | 49742455  | Promoter (2-3kb)  | 10      | 49734646  | 49739499  | -2229         | ENSG00000197444 | OGDHL        |
| NR4A2_R848 | chr10   | 68929547  | 68929947  | Promoter (9-10kb) | 10      | 68919854  | 68946553  | 9693          | ENSG00000107625 | DDX50        |
| NR4A2_R848 | chr10   | 69945942  | 69946342  | Promoter (1-2kb)  | 10      | 69944125  | 69964275  | 1817          | ENSG00000197467 | COL13A1      |
| NR4A2_R848 | chr10   | 71432366  | 71432766  | Promoter (7-8kb)  | 10      | 71439832  | 71717907  | -7066         | ENSG00000107736 | CDH23        |
| NR4A2_R848 | chr10   | 75101927  | 75102327  | Promoter (2-3kb)  | 10      | 75099586  | 75168627  | 2341          | ENSG00000156671 | SAMD8        |
| NR4A2_R848 | chr10   | 75345049  | 75345449  | Promoter (2-3kb)  | 10      | 75342280  | 75360850  | 2769          | ENSG00000226051 | ZNF503-AS1   |
| NR4A2_R848 | chr10   | 75422400  | 75422800  | Promoter (8-9kb)  | 10      | 75431624  | 76560168  | -8824         | ENSG00000148655 | LRMDA        |
| NR4A2_R848 | chr10   | 78266053  | 78266453  | Promoter (<=1kb)  | 10      | 78267310  | 78279707  | -857          | ENSG00000230417 | LINC00595    |
| NR4A2_R848 | chr10   | 80656039  | 80656478  | Promoter (6-7kb)  | 10      | 80649797  | 80653732  | 6242          | ENSG00000231082 | LINC02655    |
| NR4A2_R848 | chr10   | 84186274  | 84186674  | Promoter (7-8kb)  | 10      | 84194537  | 84218694  | -7863         | ENSG00000148600 | CDHR1        |
| NR4A2_R848 | chr10   | 84186754  | 84187154  | Promoter (7-8kb)  | 10      | 84194537  | 84218694  | -7383         | ENSG00000148600 | CDHR1        |
| NR4A2_R848 | chr10   | 86452831  | 86453231  | Promoter (8-9kb)  | 10      | 86435256  | 86444032  | -8799         | ENSG00000062650 | WAPL         |
| NR4A2_R848 | chr10   | 86653862  | 86654262  | Promoter (<=1kb)  | 10      | 86654547  | 86666460  | -285          | ENSG00000122375 | OPN4         |
| NR4A2_R848 | chr10   | 96504131  | 96504531  | Promoter (9-10kb) | 10      | 96395193  | 96513918  | 9387          | ENSG00000095587 | TLL2         |
| NR4A2_R848 | chr10   | 96721594  | 96721994  | Promoter (1-2kb)  | 10      | 96593315  | 96720514  | -1080         | ENSG00000155629 | PIK3AP1      |
| NR4A2_R848 | chr10   | 97626720  | 97627120  | Promoter (6-7kb)  | 10      | 97619410  | 97633491  | 6371          | ENSG00000171160 | MORN4        |
| NR4A2_R848 | chr10   | 104035953 | 104036416 | Promoter (1-2kb)  | 10      | 104031350 | 104034130 | -1823         | ENSG00000065618 | COL17A1      |
| NR4A2_R848 | chr10   | 104040345 | 104040745 | Promoter (6-7kb)  | 10      | 104031350 | 104034130 | -6215         | ENSG00000065618 | COL17A1      |
| NR4A2_R848 | chr10   | 114305356 | 114305756 | Promoter (<=1kb)  | 10      | 114300516 | 114305133 | -223          | ENSG00000169129 | AFAP1L2      |
| NR4A2_R848 | chr10   | 117126149 | 117126549 | Promoter (<=1kb)  | 10      | 116900312 | 117126586 | 37            | ENSG00000187164 | SHTN1        |
| NR4A2_R848 | chr10   | 122566254 | 122566654 | Promoter (<=1kb)  | 10      | 122565881 | 122582692 | 373           | ENSG00000187908 | DMBT1        |
| NR4A2_R848 | chr10   | 122599018 | 122599418 | Promoter (<=1kb)  | 10      | 122598849 | 122602120 | 169           | ENSG00000187908 | DMBT1        |
| NR4A2_R848 | chr10   | 122725035 | 122725636 | Promoter (3-4kb)  | 10      | 122729429 | 122826448 | -3793         | ENSG00000176584 | DMBT1L1      |
| NR4A2_R848 | chr10   | 124598675 | 124599075 | Promoter (6-7kb)  | 10      | 124605200 | 124613425 | -6125         | ENSG00000107902 | LHPP         |
| NR4A2_R848 | chr10   | 124621857 | 124622257 | Promoter (9-10kb) | 10      | 124612833 | 124613384 | 9024          | ENSG00000107902 | LHPP         |
| NR4A2_R848 | chr10   | 125697371 | 125697771 | Promoter (<=1kb)  | 10      | 125697529 | 125707028 | 0             | ENSG00000228021 | LOC283038    |
| NR4A2_R848 | chr10   | 125774614 | 125775014 | Promoter (<=1kb)  | 10      | 125757509 | 125774078 | -536          | ENSG00000154485 | MMP21        |
| NR4A2_R848 | chr10   | 128066931 | 128067331 | Promoter (1-2kb)  | 10      | 128068382 | 128072682 | -1051         | ENSG00000132334 | PTPRE        |
| NR4A2_R848 | chr10   | 130971485 | 130971885 | Promoter (8-9kb)  | 10      | 130962588 | 130962668 | -8817         | ENSG00000264803 | MIR378C      |
| NR4A2_R848 | chr10   | 131938849 | 131939249 | Promoter (<=1kb)  | 10      | 131939776 | 131944006 | -527          | ENSG00000175470 | PPP2R2D      |
| NR4A2_R848 | chr10   | 132067224 | 132067624 | Promoter (1-2kb)  | 10      | 132066015 | 132184844 | 1209          | ENSG00000188385 | JAKMIP3      |
| NR4A2_R848 | chr10   | 132139119 | 132139519 | Promoter (1-2kb)  | 10      | 132140528 | 132184805 | -1009         | ENSG00000188385 | JAKMIP3      |
| NR4A2_R848 | chr10   | 132154860 | 132155265 | Promoter (6-7kb)  | 10      | 132161783 | 132163383 | -6518         | ENSG00000188385 | JAKMIP3      |
| NR4A2_R848 | chr10   | 132195337 | 132195737 | Promoter (2-3kb)  | 10      | 132192760 | 132205235 | 2577          | ENSG00000151640 | DPYSL4       |
| NR4A2_R848 | chr10   | 132208514 | 132208914 | Promoter (4-5kb)  | 10      | 132203553 | 132204907 | 4961          | ENSG00000151640 | DPYSL4       |
| NR4A2_R848 | chr10   | 132298798 | 132299198 | Promoter (8-9kb)  | 10      | 132207492 | 132307214 | 8016          | ENSG00000165752 | STK32C       |
| NR4A2_R848 | chr10   | 132364268 | 132364676 | Promoter (<=1kb)  | 10      | 132365471 | 132367001 | -795          | ENSG00000148814 | LRRC27       |
| NR4A2_R848 | chr10   | 132392328 | 132392807 | Promoter (4-5kb)  | 10      | 132397168 | 132417528 | -4361         | ENSG00000171813 | PWWP2B       |
| NR4A2_R848 | chr10   | 132405687 | 132406087 | Promoter (8-9kb)  | 10      | 132397200 | 132417859 | 8487          | ENSG00000171813 | PWWP2B       |
| NR4A2_R848 | chr10   | 132514370 | 132514770 | Promoter (2-3kb)  | 10      | 132511623 | 132517139 | 2369          | NA              | LOC107984282 |
| NR4A2_R848 | chr10   | 132611124 | 132611584 | Promoter (3-4kb)  | 10      | 132607926 | 132777782 | 3198          | ENSG00000068383 | INPP5A       |
| NR4A2_R848 | chr10   | 132616436 | 132616836 | Promoter (8-9kb)  | 10      | 132607926 | 132777782 | 8510          | ENSG00000068383 | INPP5A       |
| NR4A2_R848 | chr10   | 132707831 | 132708231 | Promoter (2-3kb)  | 10      | 132710348 | 132753972 | -2117         | ENSG00000068383 | INPP5A       |
| NR4A2_R848 | chr10   | 132712904 | 132713304 | Promoter (2-3kb)  | 10      | 132710348 | 132753972 | 2556          | ENSG00000068383 | INPP5A       |
| NR4A2_R848 | chr10   | 132764288 | 132764688 | Promoter (1-2kb)  | 10      | 132765824 | 132782405 | -1136         | ENSG00000068383 | INPP5A       |
| NR4A2_R848 | chr10   | 132774931 | 132775371 | Promoter (9-10kb) | 10      | 132765824 | 132782405 | 9107          | ENSG00000068383 | INPP5A       |
| NR4A2_R848 | chr10   | 132821633 | 132822033 | Promoter (8-9kb)  | 10      | 132808443 | 132812804 | -8829         | ENSG00000171811 | CFAP46       |
| NR4A2_R848 | chr10   | 132822187 | 132822587 | Promoter (9-10kb) | 10      | 132808443 | 132812804 | -9383         | ENSG00000171811 | CFAP46       |
| NR4A2_R848 | chr10   | 132924388 | 132924788 | Promoter (7-8kb)  | 10      | 132898517 | 132916682 | -7706         | ENSG00000171811 | CFAP46       |
| NR4A2_R848 | chr10   | 132946606 | 132947006 | Promoter (3-4kb)  | 10      | 132929185 | 132942823 | -3783         | ENSG00000171811 | CFAP46       |
| NR4A2_R848 | chr10   | 133334045 | 133334743 | Promoter (2-3kb)  | 10      | 133327427 | 133336872 | 2129          | ENSG00000130643 | CALY         |
| NR4A2_R848 | chr11   | 359888    | 360288    | Promoter (9-10kb) | 11      | 369499    | 382117    | -9211         | ENSG00000182272 | B4GALNT4     |
| NR4A2_R848 | chr11   | 740250    | 740650    | Promoter (6-7kb)  | 11      | 747415    | 763520    | -6765         | ENSG00000177156 | TALDO1       |
| NR4A2_R848 | chr11   | 858767    | 859167    | Promoter (3-4kb)  | 11      | 862297    | 867109    | -3130         | ENSG00000214063 | TSPAN4       |
| NR4A2_R848 | chr11   | 884208    | 884608    | Promoter (<=1kb)  | 11      | 870122    | 884163    | -45           | ENSG00000177830 | CHID1        |
| NR4A2_R848 | chr11   | 1241082   | 1241482   | Promoter (8-9kb)  | 11      | 1242261   | 1249676   | 8194          | ENSG00000255177 | MUC5B-AS1    |
| NR4A2_R848 | chr11   | 1246006   | 1246406   | Promoter (3-4kb)  | 11      | 1242261   | 1249676   | 3270          | ENSG00000255177 | MUC5B-AS1    |
| NR4A2_R848 | chr11   | 1296417   | 1296817   | Promoter (4-5kb)  | 11      | 1288636   | 1292170   | -4247         | ENSG00000078902 | TOLLIP       |
| NR4A2_R848 | chr11   | 1408619   | 1409159   | Promoter (<=1kb)  | 11      | 1409400   | 1442516   | -241          | ENSG00000174672 | BRSK2        |
| NR4A2_R848 | chr11   | 2124939   | 2125494   | Promoter (8-9kb)  | 11      | 2134134   | 2134209   | 8715          | ENSG00000207805 | MIR483       |
| NR4A2_R848 | chr11   | 2126712   | 2127168   | Promoter (7-8kb)  | 11      | 2134134   | 2134209   | 7041          | ENSG00000207805 | MIR483       |
| NR4A2_R848 | chr11   | 2131507   | 2131907   | Promoter (2-3kb)  | 11      | 2134134   | 2134209   | 2302          | ENSG00000207805 | MIR483       |
| NR4A2_R848 | chr11   | 2305835   | 2306235   | Promoter (<=1kb)  | 11      | 2306945   | 2316187   | -710          | ENSG00000064201 | TSPAN32      |
| NR4A2_R848 | chr11   | 2306794   | 2307194   | Promoter (<=1kb)  | 11      | 2306945   | 2316187   | 0             | ENSG00000064201 | TSPAN32      |
| NR4A2_R848 | chr11   | 2430663   | 2431063   | Promoter (7-8kb)  | 11      | 2404515   | 2423045   | -7618         | ENSG00000070985 | TRPM5        |
| NR4A2_R848 | chr11   | 2471774   | 2472174   | Promoter (9-10kb) | 11      | 2461887   | 2527973   | 9887          | ENSG00000053918 | KCNQ1        |
| NR4A2_R848 | chr11   | 3131256   | 3131757   | Promoter (1-2kb)  | 11      | 3122026   | 3129329   | -1927         | ENSG00000021762 | OSBPL5       |
| NR4A2_R848 | chr11   | 3231306   | 3231706   | Promoter (<=1kb)  | 11      | 3225030   | 3232417   | 711           | ENSG00000184350 | MIRGPRE      |
| NR4A2_R848 | chr11   | 6656151   | 6656551   | Promoter (<=1kb)  | 11      | 6621330   | 6655809   | -342          | ENSG00000166341 | DCHS1        |
| NR4A2_R848 | chr11   | 8776300   | 8776700   | Promoter (<=1kb)  | 11      | 8730981   | 8776679   | 0             | ENSG00000166444 | DENND2B      |
| NR4A2_R848 | chr11   | 16887641  | 16888041  | Promoter (6-7kb)  | 11      | 16854889  | 16881619  | -6022         | ENSG00000166689 | PLEKHA7      |
| NR4A2_R848 | chr11   | 17423224  | 17423624  | Promoter (4-5kb)  | 11      | 17392935  | 17427919  | 4295          | ENSG00000006071 | ABCC8        |
| NR4A2_R848 | chr11   | 17763778  | 17764178  | Promoter (1-2kb)  | 11      | 17765799  | 17772455  | -1621         | ENSG00000129159 | KCNC1        |
| NR4A2_R848 | chr11   | 20786811  | 2078721   |                   |         |           |           |               |                 |              |

| Condition  | peakChr | peakStart | peakEnd   | annotation        | geneChr | geneStart   | geneEnd   | distanceToTSS | geneID          | geneSymbol   |
|------------|---------|-----------|-----------|-------------------|---------|-------------|-----------|---------------|-----------------|--------------|
| NR4A2_R848 | chr11   | 61103691  | 61104091  | Promoter (1-2kb)  | 11      | 61102509    | 61119359  | 1182          | ENSG00000110448 | CD5          |
| NR4A2_R848 | chr11   | 61497020  | 61497420  | Promoter (7-8kb)  | 11      | 61489038    | 61490927  | 7982          | ENSG00000162148 | PPP1R32      |
| NR4A2_R848 | chr11   | 63926735  | 63927135  | Promoter (9-10kb) | 11      | 63911230    | 63917164  | -9571         | ENSG00000167771 | RCOR2        |
| NR4A2_R848 | chr11   | 64581991  | 64582400  | Promoter (8-9kb)  | 11      | 64590641    | 64602348  | -8241         | ENSG00000197891 | SLC22A12     |
| NR4A2_R848 | chr11   | 64797183  | 64797583  | Promoter (<=1kb)  | 11      | 64789137    | 64797343  | 0             | ENSG00000168067 | MAP4K2       |
| NR4A2_R848 | chr11   | 65185828  | 65186228  | Promoter (<=1kb)  | 11      | 65185932    | 65187686  | 0             | ENSG00000014216 | CAPN1        |
| NR4A2_R848 | chr11   | 65980690  | 65981090  | Promoter (2-3kb)  | 11      | 65978487    | 65979089  | 2203          | ENSG00000175467 | SART1        |
| NR4A2_R848 | chr11   | 66214357  | 66214757  | Promoter (1-2kb)  | 11      | 66216198    | 66220677  | -1441         | ENSG00000175115 | PACS1        |
| NR4A2_R848 | chr11   | 66327416  | 66327816  | Promoter (5-6kb)  | 11      | 66332590    | 66333553  | 5737          | ENSG00000174791 | RIN1         |
| NR4A2_R848 | chr11   | 66501543  | 66501943  | Promoter (2-3kb)  | 11      | 66504645    | 66509331  | -2702         | ENSG00000254986 | DPP3         |
| NR4A2_R848 | chr11   | 66864419  | 66864819  | Promoter (7-8kb)  | 11      | 66860448    | 66872039  | 7220          | ENSG00000173599 | PC           |
| NR4A2_R848 | chr11   | 66979138  | 66979538  | Promoter (3-4kb)  | 11      | 66975277    | 66977004  | 3861          | ENSG00000173237 | C11orf86     |
| NR4A2_R848 | chr11   | 67669017  | 67669663  | Promoter (1-2kb)  | 11      | 67666157    | 67667970  | -1047         | ENSG00000132746 | ALDH3B2      |
| NR4A2_R848 | chr11   | 68264401  | 68264801  | Promoter (7-8kb)  | 11      | 68267180    | 68271916  | 7115          | ENSG00000171067 | C11orf24     |
| NR4A2_R848 | chr11   | 68816963  | 68817363  | Promoter (1-2kb)  | 11      | 68807516    | 68818692  | 1329          | ENSG00000110090 | CPT1A        |
| NR4A2_R848 | chr11   | 69064893  | 69065293  | Promoter (7-8kb)  | 11      | 69072915    | 69162440  | -7622         | ENSG00000284713 | SMIM38       |
| NR4A2_R848 | chr11   | 69069683  | 69070083  | Promoter (2-3kb)  | 11      | 69072915    | 69162440  | -2832         | ENSG00000284713 | SMIM38       |
| NR4A2_R848 | chr11   | 69291332  | 69291732  | Promoter (2-3kb)  | 11      | 69294151    | 69341682  | -2419         | ENSG00000172927 | MYEOV        |
| NR4A2_R848 | chr11   | 69813540  | 69814054  | Promoter (3-4kb)  | 11      | 69809990    | 69817550  | 3496          | ENSG00000186895 | FGF3         |
| NR4A2_R848 | chr11   | 69814888  | 69815380  | Promoter (2-3kb)  | 11      | 69809990    | 69817550  | 2170          | ENSG00000186895 | FGF3         |
| NR4A2_R848 | chr11   | 70669010  | 70669410  | Promoter (6-7kb)  | 11      | 70467856    | 70662197  | -6813         | ENSG00000162105 | SHANK2       |
| NR4A2_R848 | chr11   | 70702069  | 70702618  | Promoter (3-4kb)  | 11      | 70492432    | 70698769  | -3300         | ENSG00000162105 | SHANK2       |
| NR4A2_R848 | chr11   | 70905756  | 70906156  | Promoter (9-10kb) | 11      | 70820364    | 70896567  | -9189         | ENSG00000162105 | SHANK2       |
| NR4A2_R848 | chr11   | 71440197  | 71440597  | Promoter (<=1kb)  | 11      | 71438749    | 71441347  | 750           | ENSG00000172893 | DHCR7        |
| NR4A2_R848 | chr11   | 71577513  | 71577913  | Promoter (4-5kb)  | 11      | 71581855    | 71582875  | 4962          | ENSG00000204571 | KRTAP5-11    |
| NR4A2_R848 | chr11   | 72640034  | 72640434  | Promoter (1-2kb)  | 11      | 72590199    | 72642411  | 1977          | ENSG00000186642 | PDE2A        |
| NR4A2_R848 | chr11   | 72674354  | 72674754  | Promoter (<=1kb)  | 11      | 72576141    | 72674422  | 0             | ENSG00000186642 | PDE2A        |
| NR4A2_R848 | chr11   | 75281302  | 75281702  | Promoter (<=1kb)  | 11      | 75281006    | 75282132  | 430           | ENSG00000137486 | ARRB1        |
| NR4A2_R848 | chr11   | 75439103  | 75439503  | Promoter (<=1kb)  | 11      | 75434939    | 75438848  | -255          | ENSG00000158555 | GDPD5        |
| NR4A2_R848 | chr11   | 76713104  | 76713504  | Promoter (6-7kb)  | 11      | 76694041    | 76719801  | 6297          | NA              | GUCY2EP      |
| NR4A2_R848 | chr11   | 77178142  | 77178542  | Promoter (1-2kb)  | 11      | 77179825    | 77215238  | -1283         | ENSG00000137474 | MYO7A        |
| NR4A2_R848 | chr11   | 77192755  | 77193190  | Promoter (8-9kb)  | 11      | 77184686    | 77191187  | 8069          | ENSG00000137474 | MYO7A        |
| NR4A2_R848 | chr11   | 77289643  | 77290043  | Promoter (2-3kb)  | 11      | 77216558    | 77287418  | -2225         | ENSG00000178795 | GDPD4        |
| NR4A2_R848 | chr11   | 78136167  | 78136567  | Promoter (2-3kb)  | 11      | 78121137    | 78139258  | 2691          | ENSG00000159063 | ALG8         |
| NR4A2_R848 | chr11   | 90547467  | 90547867  | Promoter (7-8kb)  | 11      | 90555774    | 90555857  | 7990          | ENSG00000266703 | MIR4490      |
| NR4A2_R848 | chr11   | 102730990 | 102731390 | Promoter (3-4kb)  | 11      | 102712632   | 102727050 | -3940         | ENSG00000118113 | MMP8         |
| NR4A2_R848 | chr11   | 107465802 | 107466202 | Promoter (7-8kb)  | 11      | 107326345   | 107457844 | -7958         | ENSG00000152404 | CWF19L2      |
| NR4A2_R848 | chr11   | 111264632 | 111265032 | Promoter (8-9kb)  | 11      | 111255983   | 111286248 | 8649          | ENSG00000150750 | C11orf53     |
| NR4A2_R848 | chr11   | 111358341 | 111358756 | Promoter (<=1kb)  | 11      | 111354537   | 111359406 | 650           | ENSG00000110777 | POU2AF1      |
| NR4A2_R848 | chr11   | 112254062 | 112254462 | Promoter (5-6kb)  | 11      | 112260265   | 112261396 | -5803         | ENSG00000268472 | LOC100132686 |
| NR4A2_R848 | chr11   | 113698693 | 113699093 | Promoter (4-5kb)  | 11      | 113690952   | 113694414 | -4279         | ENSG00000166682 | TMPRSS5      |
| NR4A2_R848 | chr11   | 116635337 | 116635737 | Promoter (3-4kb)  | 11      | 116639422   | 116658252 | -3685         | ENSG00000237937 | LINC02702    |
| NR4A2_R848 | chr11   | 117193044 | 117193444 | Promoter (<=1kb)  | 11      | 117192617   | 117197279 | 427           | ENSG00000149577 | SIDT2        |
| NR4A2_R848 | chr11   | 118639235 | 118639635 | Promoter (<=1kb)  | 11      | 118639407   | 118645783 | 0             | ENSG00000019144 | PHLDB1       |
| NR4A2_R848 | chr11   | 118641867 | 118642329 | Promoter (<=1kb)  | 11      | 118642039   | 118644565 | 0             | ENSG00000019144 | PHLDB1       |
| NR4A2_R848 | chr11   | 118651476 | 118651876 | Promoter (<=1kb)  | 11      | 118650601   | 118657490 | 875           | ENSG00000019144 | PHLDB1       |
| NR4A2_R848 | chr11   | 120122790 | 120123190 | Promoter (<=1kb)  | 11      | 120112410   | 120123032 | 0             | ENSG00000137699 | TRIM29       |
| NR4A2_R848 | chr11   | 123583146 | 123583546 | Promoter (7-8kb)  | 11      | 123591087   | 123627774 | -7541         | ENSG00000023171 | GRAMD1B      |
| NR4A2_R848 | chr11   | 124907964 | 124908364 | Promoter (9-10kb) | 11      | 124895861   | 124898500 | -9464         | ENSG00000154133 | ROBO4        |
| NR4A2_R848 | chr11   | 130195624 | 130196024 | Promoter (5-6kb)  | 11      | 130190223   | 130196610 | 5401          | ENSG00000149418 | ST14         |
| NR4A2_R848 | chr11   | 133902356 | 133902756 | Promoter (3-4kb)  | 11      | 133898504   | 133898581 | -3775         | ENSG00000284020 | MIR4697      |
| NR4A2_R848 | chr11   | 133947647 | 133948047 | Promoter (1-2kb)  | 11      | 133937407   | 133946292 | -1355         | ENSG00000080854 | IGSF9B       |
| NR4A2_R848 | chr11   | 134397097 | 134397497 | Promoter (4-5kb)  | 11      | 134381645   | 134392353 | -4744         | ENSG00000109956 | B3GAT1       |
| NR4A2_R848 | chr12   | 944354    | 944754    | Promoter (4-5kb)  | 12      | 929772      | 949519    | 4765          | ENSG00000002016 | RAD52        |
| NR4A2_R848 | chr12   | 5865606   | 5866006   | Promoter (4-5kb)  | 12      | 5827805     | 5870436   | 4430          | ENSG00000047617 | ANO2         |
| NR4A2_R848 | chr12   | 48841417  | 48841817  | Promoter (1-2kb)  | 12      | 48830057    | 48839855  | -1562         | ENSG00000174243 | DDX23        |
| NR4A2_R848 | chr12   | 49700533  | 49700933  | Promoter (6-7kb)  | 12      | 49644931    | 49707220  | 6287          | ENSG00000161791 | FMNL3        |
| NR4A2_R848 | chr12   | 49969995  | 49970395  | Promoter (2-3kb)  | 12      | 49972837    | 49974007  | -2442         | ENSG00000086159 | AQP6         |
| NR4A2_R848 | chr12   | 50135106  | 50135506  | Promoter (<=1kb)  | 12      | 50133785    | 50135537  | 31            | ENSG00000139624 | CERS5        |
| NR4A2_R848 | chr12   | 50252209  | 50252609  | Promoter (2-3kb)  | 12      | 50222318    | 50249893  | -2316         | ENSG00000050405 | LIMA1        |
| NR4A2_R848 | chr12   | 51066199  | 51066599  | Promoter (9-10kb) | 12      | 51056371    | 51059649  | 9828          | ENSG00000050426 | LETMD1       |
| NR4A2_R848 | chr12   | 52405822  | 52406222  | Promoter (<=1kb)  | 12      | 52393931    | 52406355  | 133           | ENSG00000161850 | KRT82        |
| NR4A2_R848 | chr12   | 53316072  | 53316472  | Promoter (<=1kb)  | 12      | 53307890    | 53315784  | -288          | ENSG00000094914 | AAAS         |
| NR4A2_R848 | chr12   | 56033525  | 56033925  | Promoter (1-2kb)  | 12      | 56032280    | 56034600  | 1245          | ENSG00000123411 | IKZF4        |
| NR4A2_R848 | chr12   | 56084477  | 56084877  | Promoter (1-2kb)  | 12      | 56083319    | 56102336  | 1158          | ENSG00000065361 | ERBB3        |
| NR4A2_R848 | chr12   | 56692785  | 56693185  | Promoter (4-5kb)  | 12      | 56663343    | 56688408  | -4377         | ENSG00000110958 | PTGES3       |
| NR4A2_R848 | chr12   | 57023180  | 57023580  | Promoter (5-6kb)  | 12      | 57012378    | 57028883  | 5303          | ENSG00000166863 | TAC3         |
| NR4A2_R848 | chr12   | 57187722  | 57188122  | Promoter (<=1kb)  | 12      | 57187369    | 57192969  | 353           | ENSG00000123384 | LRP1         |
| NR4A2_R848 | chr12   | 57191667  | 57192156  | Promoter (2-3kb)  | 12      | 57194504    | 57194576  | -2348         | ENSG00000221365 | MIR1228      |
| NR4A2_R848 | chr12   | 57210262  | 57210662  | Promoter (6-7kb)  | 12      | 57216794    | 57226449  | -6132         | ENSG00000182379 | NXPH4        |
| NR4A2_R848 | chr12   | 57732909  | 57733309  | Promoter (1-2kb)  | 12      | 57730383    | 57731829  | -1080         | ENSG00000135439 | AGAP2        |
| NR4A2_R848 | chr12   | 62795730  | 62796130  | Promoter (7-8kb)  | 12      | 62689750    | 62788484  | -7246         | ENSG00000111110 | PPM1H        |
| NR4A2_R848 | chr12   | 62938165  | 62938565  | Promoter (3-4kb)  | 12      | 62643994    | 62935150  | -3015         | ENSG00000111110 | PPM1H        |
| NR4A2_R848 | chr12   | 64131264  | 64131664  | Promoter (3-4kb)  | 12      | 64127637    | 64142566  | 3627          | ENSG00000196935 | SRGAP1       |
| NR4A2_R848 | chr12   | 80823210  | 80823610  | Promoter (9-10kb) | 12      | 80832533    | 80832629  | 9019          | ENSG00000207763 | MIR617       |
| NR4A2_R848 | chr12   | 108341926 | 108342326 | Promoter (2-3kb)  | 12      | 108288044   | 108339317 | -2609         | ENSG00000174600 | CMKLR1       |
| NR4A2_R848 | chr12   | 108595268 | 108595668 | Promoter (2-3kb)  | 12      | 108592252   | 108598008 | 2340          | ENSG00000183160 | TMEM119      |
| NR4A2_R848 | chr12   | 108895069 | 108895469 | Promoter (3-4kb)  | 12      | 108898472   | 108900493 | -3003         | ENSG00000110887 | DAO          |
| NR4A2_R848 | chr12   | 109284971 | 109285371 | Promoter (1-2kb)  | 12      | 109277979   | 109286723 | 1352          | ENSG00000139445 | FOXN4        |
| NR4A2_R848 | chr12   | 109398387 | 109398787 | Promoter (2-3kb)  | 12      | 109401405   | 109407881 | -2618         | ENSG00000174527 | MYO1H        |
| NR4A2_R848 | chr12   | 109808792 | 109809488 | Promoter (5-6kb)  | 12      | 109783621   | 109814796 | 5308          | ENSG00000111199 | TRPV4        |
| NR4A2_R848 | chr12   | 110406848 | 110407248 | Promoter (3-4kb)  | 12      | 110375477   | 110403730 | -3118         | ENSG00000196510 | ANAPC7       |
| NR4A2_R848 | chr12   | 112574534 | 112575008 | Promoter (<=1kb)  | 12      | 112575027   | 112865465 | -19           | ENSG00000089169 | RPH3A        |
| NR4A2_R848 | chr12   | 113437542 | 113437942 | Promoter (2-3kb)  | 12      | 113435507   | 113437109 | 2035          | ENSG00000139410 | SDSL         |
| NR4A2_R848 | chr12   | 114243650 | 114244050 | Promoter (1-2kb)  | 12      | 114238970   | 114241770 | -1880         | ENSG00000257476 | LINC02459    |
| NR4A2_R848 | chr12   | 116839327 | 116839727 | Promoter (3-4kb)  | 12      | 116835997   | 116852945 | 3330          | ENSG00000135119 | RNF22        |
| NR4A2_R848 | chr12   | 117199945 | 117200345 | Promoter (9-10kb) | 12      | 117141988   | 117190531 | -9414         | ENSG00000135108 | FBXO21       |
| NR4A2_R848 | chr12   | 117321963 | 117322647 | Promoter (8-9kb)  | 12      | 117215259   | 117331074 | 8427          | ENSG00000089250 | NOS1         |
| NR4A2_R848 | chr12   | 117454694 | 117455094 | Promoter (2-3kb)  | 12      | 117331433   | 117452170 | -2524         | ENSG00000089250 | NOS1         |
| NR4A2_R848 | chr12   | 117558520 | 117558920 | Promoter (3-4kb)  | 12      | 117539472   | 117555229 | -3291         | ENSG00000171435 | KSR2         |
| NR4A2_R848 | chr12   | 120525030 | 120525430 | Promoter (3-4kb)  | 12      | 120503969   | 120529140 | 3710          | ENSG00000110871 | COQ5         |
| NR4A2_R848 | chr12   | 120914101 | 120914501 | Promoter (9-10kb) | 12      | 120904702</ |           |               |                 |              |



| Condition  | peakChr | peakStart | peakEnd   | annotation        | geneChr | geneStart | geneEnd   | distanceToTSS | geneID          | geneSymbol   |
|------------|---------|-----------|-----------|-------------------|---------|-----------|-----------|---------------|-----------------|--------------|
| NR4A2_R848 | chr12   | 132597274 | 132597776 | Promoter (8-9kb)  | 12      | 132604015 | 132606264 | 8488          | ENSG00000204583 | LRCOL1       |
| NR4A2_R848 | chr13   | 18903874  | 18904274  | Promoter (1-2kb)  | 13      | 18905419  | 18908443  | -1145         | ENSG00000226250 | LINC00408    |
| NR4A2_R848 | chr13   | 19118807  | 19119207  | Promoter (<=1kb)  | 13      | 19074038  | 19118315  | -492          | ENSG00000287861 | LOC107984132 |
| NR4A2_R848 | chr13   | 24682010  | 24682410  | Promoter (1-2kb)  | 13      | 24680577  | 24712493  | 1433          | ENSG00000075673 | ATP12A       |
| NR4A2_R848 | chr13   | 24895125  | 24895525  | Promoter (5-6kb)  | 13      | 24884330  | 24889355  | -5770         | ENSG00000151849 | CENPJ        |
| NR4A2_R848 | chr13   | 29491742  | 29492142  | Promoter (1-2kb)  | 13      | 29476515  | 29490105  | -1637         | NA              | MTUS2-AS1    |
| NR4A2_R848 | chr13   | 35706659  | 35707059  | Promoter (9-10kb) | 13      | 35697525  | 35699256  | 9134          | ENSG00000236036 | LINC00445    |
| NR4A2_R848 | chr13   | 49565356  | 49565756  | Promoter (1-2kb)  | 13      | 49531946  | 49567323  | 1567          | ENSG00000136144 | RCBTB1       |
| NR4A2_R848 | chr13   | 52815770  | 52816170  | Promoter (5-6kb)  | 13      | 52810050  | 52810140  | 5720          | ENSG00000211579 | MIR759       |
| NR4A2_R848 | chr13   | 63837794  | 63838194  | Promoter (4-5kb)  | 13      | 63832361  | 63833531  | -4263         | ENSG00000285566 | LOC647264    |
| NR4A2_R848 | chr13   | 75792274  | 75792674  | Promoter (3-4kb)  | 13      | 75788838  | 75817278  | 3436          | ENSG00000136153 | LMO7         |
| NR4A2_R848 | chr13   | 110043415 | 110043888 | Promoter (9-10kb) | 13      | 110053285 | 110054952 | -9397         | ENSG00000231428 | LINC00396    |
| NR4A2_R848 | chr13   | 110873609 | 110874009 | Promoter (3-4kb)  | 13      | 110863987 | 110870251 | -3358         | ENSG00000255874 | PRECSIT      |
| NR4A2_R848 | chr13   | 111590107 | 111590507 | Promoter (5-6kb)  | 13      | 111596009 | 111642079 | -5502         | ENSG00000215881 | LINC02337    |
| NR4A2_R848 | chr13   | 112078609 | 112079136 | Promoter (<=1kb)  | 13      | 112080005 | 112099924 | -869          | ENSG00000224243 | SOX1-OT      |
| NR4A2_R848 | chr13   | 112778491 | 112778891 | Promoter (6-7kb)  | 13      | 112785145 | 112860798 | -6254         | ENSG0000068650  | ATP11A       |
| NR4A2_R848 | chr13   | 112840037 | 112840773 | Promoter (1-2kb)  | 13      | 112842309 | 112886113 | -1536         | ENSG0000068650  | ATP11A       |
| NR4A2_R848 | chr13   | 112962028 | 112962428 | Promoter (6-7kb)  | 13      | 112968500 | 113099739 | -6072         | ENSG00000126217 | MCF2L        |
| NR4A2_R848 | chr13   | 112972386 | 112972786 | Promoter (3-4kb)  | 13      | 112969214 | 113099742 | 3172          | ENSG00000126217 | MCF2L        |
| NR4A2_R848 | chr13   | 113056842 | 113057753 | Promoter (6-7kb)  | 13      | 113064312 | 113070394 | -6559         | ENSG00000126217 | MCF2L        |
| NR4A2_R848 | chr13   | 113058276 | 113058821 | Promoter (5-6kb)  | 13      | 113064312 | 113070394 | -5491         | ENSG00000126217 | MCF2L        |
| NR4A2_R848 | chr13   | 113111996 | 113112396 | Promoter (1-2kb)  | 13      | 113110679 | 113114903 | 1317          | ENSG00000057593 | F7           |
| NR4A2_R848 | chr13   | 113112651 | 113113051 | Promoter (1-2kb)  | 13      | 113110679 | 113114903 | 1972          | ENSG00000057593 | F7           |
| NR4A2_R848 | chr13   | 113119050 | 113119450 | Promoter (3-4kb)  | 13      | 113122799 | 113149529 | -3349         | ENSG00000126218 | F10          |
| NR4A2_R848 | chr13   | 113122966 | 113123366 | Promoter (<=1kb)  | 13      | 113122838 | 113147472 | 128           | ENSG00000126218 | F10          |
| NR4A2_R848 | chr13   | 113546112 | 113546512 | Promoter (<=1kb)  | 13      | 113545755 | 113549915 | 357           | ENSG00000150403 | TMCO3        |
| NR4A2_R848 | chr13   | 113588677 | 113589077 | Promoter (3-4kb)  | 13      | 113585426 | 113633287 | 3251          | ENSG00000198176 | TFDP1        |
| NR4A2_R848 | chr13   | 113796251 | 113796651 | Promoter (3-4kb)  | 13      | 113799888 | 113804890 | -3237         | ENSG00000184497 | TMEM255B     |
| NR4A2_R848 | chr13   | 113919792 | 113920192 | Promoter (3-4kb)  | 13      | 113915941 | 113920995 | 3851          | ENSG00000229373 | LINC00452    |
| NR4A2_R848 | chr14   | 19865953  | 19866353  | Promoter (2-3kb)  | 14      | 19868197  | 19869143  | 2790          | ENSG00000176290 | OR4K3        |
| NR4A2_R848 | chr14   | 21443468  | 21443868  | Promoter (6-7kb)  | 14      | 21385495  | 21437308  | -6160         | ENSG00000100888 | CHD8         |
| NR4A2_R848 | chr14   | 34589223  | 34589623  | Promoter (2-3kb)  | 14      | 34575591  | 34586316  | -2907         | ENSG00000129515 | SNX6         |
| NR4A2_R848 | chr14   | 59508195  | 59508595  | Promoter (2-3kb)  | 14      | 59504539  | 59510713  | 2118          | ENSG00000151838 | CCDC175      |
| NR4A2_R848 | chr14   | 67399480  | 67399880  | Promoter (1-2kb)  | 14      | 67387388  | 67397820  | -1660         | ENSG00000100558 | PLEK2        |
| NR4A2_R848 | chr14   | 68898839  | 68899399  | Promoter (8-9kb)  | 14      | 68879046  | 68890142  | -8697         | ENSG00000072110 | ACTN1        |
| NR4A2_R848 | chr14   | 69269611  | 69270011  | Promoter (9-10kb) | 14      | 69260291  | 69348092  | 9320          | ENSG00000100626 | GALNT16      |
| NR4A2_R848 | chr14   | 72943523  | 72943923  | Promoter (<=1kb)  | 14      | 72942719  | 72946029  | 804           | ENSG00000119599 | DCAF4        |
| NR4A2_R848 | chr14   | 74287405  | 74287805  | Promoter (<=1kb)  | 14      | 74286526  | 74288641  | 836           | ENSG00000119688 | ABCD4        |
| NR4A2_R848 | chr14   | 77807300  | 77807700  | Promoter (7-8kb)  | 14      | 77800139  | 77933952  | 7161          | ENSG00000063761 | ADCK1        |
| NR4A2_R848 | chr14   | 92046906  | 92047306  | Promoter (6-7kb)  | 14      | 92015833  | 92040896  | -6010         | ENSG00000100815 | TRIP11       |
| NR4A2_R848 | chr14   | 94519554  | 94519954  | Promoter (1-2kb)  | 14      | 94487283  | 94517844  | -1710         | ENSG00000165953 | SERPINA12    |
| NR4A2_R848 | chr14   | 94651061  | 94651535  | Promoter (9-10kb) | 14      | 94641318  | 94645026  | 9743          | ENSG00000187483 | SERPINA13P   |
| NR4A2_R848 | chr14   | 99927896  | 99928304  | Promoter (7-8kb)  | 14      | 99936167  | 99940174  | -7863         | ENSG0000066629  | EML1         |
| NR4A2_R848 | chr14   | 100144965 | 100145365 | Promoter (3-4kb)  | 14      | 100141180 | 100142235 | 3785          | ENSG00000196405 | EVL          |
| NR4A2_R848 | chr14   | 100526654 | 100527054 | Promoter (<=1kb)  | 14      | 100525946 | 100529624 | 708           | ENSG00000176473 | WDR25        |
| NR4A2_R848 | chr14   | 100722589 | 100722989 | Promoter (2-3kb)  | 14      | 100725705 | 100732070 | -2716         | ENSG00000185559 | DLK1         |
| NR4A2_R848 | chr14   | 100861884 | 100862284 | Promoter (4-5kb)  | 14      | 100857624 | 100861021 | 4260          | ENSG00000214548 | MEG3         |
| NR4A2_R848 | chr14   | 100873191 | 100873591 | Promoter (<=1kb)  | 14      | 100874493 | 100874585 | -902          | ENSG00000199151 | MIR337       |
| NR4A2_R848 | chr14   | 101019492 | 101019892 | Promoter (2-3kb)  | 14      | 101022066 | 101022132 | -2174         | ENSG00000199088 | MIR379       |
| NR4A2_R848 | chr14   | 101020087 | 101020539 | Promoter (1-2kb)  | 14      | 101022066 | 101022132 | -1527         | ENSG00000199088 | MIR379       |
| NR4A2_R848 | chr14   | 101117616 | 101118016 | Promoter (2-3kb)  | 14      | 101120840 | 101123545 | -2824         | ENSG00000259004 | LINC02285    |
| NR4A2_R848 | chr14   | 101548239 | 101548973 | Promoter (6-7kb)  | 14      | 101552223 | 101555676 | 6703          | ENSG00000258498 | DIO3OS       |
| NR4A2_R848 | chr14   | 101555677 | 101556077 | Promoter (<=1kb)  | 14      | 101552223 | 101555676 | -1            | ENSG00000258498 | DIO3OS       |
| NR4A2_R848 | chr14   | 102497578 | 102497978 | Promoter (<=1kb)  | 14      | 102497539 | 102498412 | 39            | ENSG00000196663 | TECPR2       |
| NR4A2_R848 | chr14   | 102950713 | 102951113 | Promoter (4-5kb)  | 14      | 102943813 | 102945724 | -4989         | ENSG00000198752 | CDC42BPB     |
| NR4A2_R848 | chr14   | 103084325 | 103084725 | Promoter (<=1kb)  | 14      | 103084210 | 103090027 | 115           | ENSG00000283071 | LBHD2        |
| NR4A2_R848 | chr14   | 103621127 | 103621527 | Promoter (7-8kb)  | 14      | 103629177 | 103714249 | -7650         | ENSG00000126214 | KLC1         |
| NR4A2_R848 | chr14   | 104231938 | 104232338 | Promoter (8-9kb)  | 14      | 104223655 | 104244622 | 8283          | ENSG00000258913 | LINC02691    |
| NR4A2_R848 | chr14   | 104664970 | 104665370 | Promoter (<=1kb)  | 14      | 104661120 | 104665558 | 188           | ENSG00000260792 | LINC02280    |
| NR4A2_R848 | chr14   | 104685480 | 104685880 | Promoter (3-4kb)  | 14      | 104689606 | 104722535 | -3726         | ENSG00000203485 | INF2         |
| NR4A2_R848 | chr14   | 104858930 | 104859991 | Promoter (5-6kb)  | 14      | 104865268 | 104896747 | -5277         | ENSG00000099814 | CEP170B      |
| NR4A2_R848 | chr14   | 104860193 | 104860593 | Promoter (4-5kb)  | 14      | 104865268 | 104896747 | -4675         | ENSG00000099814 | CEP170B      |
| NR4A2_R848 | chr14   | 104872253 | 104872653 | Promoter (6-7kb)  | 14      | 104865313 | 104896770 | 6940          | ENSG00000099814 | CEP170B      |
| NR4A2_R848 | chr14   | 104946968 | 104947368 | Promoter (8-9kb)  | 14      | 104953537 | 104955402 | 8034          | ENSG00000185567 | AHNAK2       |
| NR4A2_R848 | chr14   | 105083881 | 105084281 | Promoter (9-10kb) | 14      | 105093609 | 105095699 | -9328         | NA              | LINC02298    |
| NR4A2_R848 | chr14   | 105215447 | 105215847 | Promoter (2-3kb)  | 14      | 105210078 | 105213428 | -2019         | ENSG00000185024 | BRF1         |
| NR4A2_R848 | chr14   | 105449245 | 105449645 | Promoter (<=1kb)  | 14      | 105449240 | 105460953 | 5             | ENSG00000182979 | MTA1         |
| NR4A2_R848 | chr15   | 25693514  | 25693914  | Promoter (<=1kb)  | 15      | 25683447  | 25694825  | 911           | ENSG00000206190 | ATP10A       |
| NR4A2_R848 | chr15   | 28104671  | 28105071  | Promoter (5-6kb)  | 15      | 27754875  | 28099315  | -5356         | ENSG00000104044 | OCA2         |
| NR4A2_R848 | chr15   | 28105351  | 28105751  | Promoter (6-7kb)  | 15      | 27754875  | 28099315  | -6036         | ENSG00000104044 | OCA2         |
| NR4A2_R848 | chr15   | 28915017  | 28915478  | Promoter (3-4kb)  | 15      | 28919367  | 29054094  | -3889         | ENSG0000034053  | APBA2        |
| NR4A2_R848 | chr15   | 35081626  | 35082026  | Promoter (3-4kb)  | 15      | 35084193  | 35085110  | 3084          | ENSG00000255192 | NANOGP8      |
| NR4A2_R848 | chr15   | 41522380  | 41522780  | Promoter (<=1kb)  | 15      | 41517176  | 41521791  | -589          | ENSG00000103932 | RPAP1        |
| NR4A2_R848 | chr15   | 43802743  | 43803143  | Promoter (2-3kb)  | 15      | 43800627  | 43801928  | 2116          | ENSG00000242028 | HYPK         |
| NR4A2_R848 | chr15   | 44618199  | 44618599  | Promoter (1-2kb)  | 15      | 44613509  | 44620305  | 1706          | ENSG00000104133 | SPG11        |
| NR4A2_R848 | chr15   | 65201533  | 65201933  | Promoter (9-10kb) | 15      | 65194760  | 65211473  | 9540          | ENSG00000138615 | CILP         |
| NR4A2_R848 | chr15   | 65366084  | 65366484  | Promoter (8-9kb)  | 15      | 65373489  | 65375300  | 8816          | ENSG00000174498 | IGDCC3       |
| NR4A2_R848 | chr15   | 65396234  | 65396634  | Promoter (<=1kb)  | 15      | 65381487  | 65396429  | 0             | ENSG00000103742 | IGDCC4       |
| NR4A2_R848 | chr15   | 65485482  | 65485882  | Promoter (4-5kb)  | 15      | 65452044  | 65490286  | 4404          | ENSG00000074603 | DPP8         |
| NR4A2_R848 | chr15   | 65650448  | 65650848  | Promoter (1-2kb)  | 15      | 65652739  | 65655513  | -1891         | ENSG00000074621 | SLC24A1      |
| NR4A2_R848 | chr15   | 68436366  | 68436766  | Promoter (4-5kb)  | 15      | 68296532  | 68432163  | -4203         | ENSG00000137809 | ITGA11       |
| NR4A2_R848 | chr15   | 69475165  | 69475565  | Promoter (7-8kb)  | 15      | 69468036  | 69571083  | 7129          | ENSG00000245750 | DRAIC        |
| NR4A2_R848 | chr15   | 70629286  | 70629686  | Promoter (5-6kb)  | 15      | 70635249  | 70637314  | -5563         | ENSG00000280515 | SALRNA2      |
| NR4A2_R848 | chr15   | 72679216  | 72679616  | Promoter (6-7kb)  | 15      | 72686179  | 72738475  | -6563         | ENSG00000140463 | BBS4         |
| NR4A2_R848 | chr15   | 75761678  | 75762078  | Promoter (<=1kb)  | 15      | 75762215  | 75762315  | 237           | ENSG00000284385 | MIR4313      |
| NR4A2_R848 | chr15   | 75839931  | 75840331  | Promoter (2-3kb)  | 15      | 75843307  | 75901044  | -2976         | ENSG00000140367 | UBE2Q2       |
| NR4A2_R848 | chr15   | 77623778  | 77624178  | Promoter (8-9kb)  | 15      | 77613027  | 77632490  | 8312          | ENSG00000169783 | LINGO1       |
| NR4A2_R848 | chr15   | 77699484  | 77699884  | Promoter (2-3kb)  | 15      | 77615722  | 77696495  | -2989         | ENSG00000169783 | LINGO1       |
| NR4A2_R848 | chr15   | 77809981  | 77810381  | Promoter (9-10kb) | 15      | 77615673  | 77819452  | 9071          | ENSG00000169783 | LINGO1       |
| NR4A2_R848 | chr15   | 78109657  | 78110057  | Promoter (1-2kb)  | 15      | 78105147  | 78111251  | 1194          | ENSG00000136425 | CIB2         |
| NR4A2_R848 | chr15   | 78632161  | 78632561  | Promoter (8-9kb)  | 15      | 78624111  | 78641210  | 8649          | ENSG00000117971 | CHRNB4       |
| NR4A2_R848 |         |           |           |                   |         |           |           |               |                 |              |

| Condition  | peakChr | peakStart | peakEnd  | annotation        | geneChr | geneStart | geneEnd  | distanceToTSS | geneID          | geneSymbol   |
|------------|---------|-----------|----------|-------------------|---------|-----------|----------|---------------|-----------------|--------------|
| NR4A2_R848 | chr15   | 99014691  | 99015091 | Promoter (<=1kb)  | 15      | 99014696  | 99031054 | 0             | NA              | LUNAR1       |
| NR4A2_R848 | chr16   | 182235    | 182635   | Promoter (1-2kb)  | 16      | 180459    | 181179   | 1776          | ENSG00000086506 | HBQ1         |
| NR4A2_R848 | chr16   | 291381    | 291781   | Promoter (1-2kb)  | 16      | 288190    | 293536   | 1755          | ENSG00000103126 | AXIN1        |
| NR4A2_R848 | chr16   | 341096    | 341496   | Promoter (4-5kb)  | 16      | 287440    | 346322   | 4826          | ENSG00000103126 | AXIN1        |
| NR4A2_R848 | chr16   | 571176    | 571576   | Promoter (<=1kb)  | 16      | 572506    | 583095   | -930          | ENSG0000007541  | PIGQ         |
| NR4A2_R848 | chr16   | 631799    | 632199   | Promoter (<=1kb)  | 16      | 630985    | 634117   | 814           | ENSG00000127578 | WFIKKN1      |
| NR4A2_R848 | chr16   | 654345    | 654745   | Promoter (<=1kb)  | 16      | 655058    | 657123   | -313          | ENSG00000161996 | WDR90        |
| NR4A2_R848 | chr16   | 655618    | 656018   | Promoter (<=1kb)  | 16      | 656275    | 667829   | -257          | ENSG00000161996 | WDR90        |
| NR4A2_R848 | chr16   | 773568    | 773968   | Promoter (3-4kb)  | 16      | 770183    | 770277   | 3385          | ENSG00000207579 | MIR662       |
| NR4A2_R848 | chr16   | 914436    | 914836   | Promoter (6-7kb)  | 16      | 921033    | 934266   | -6197         | ENSG00000260439 | LMF1-AS1     |
| NR4A2_R848 | chr16   | 977716    | 978116   | Promoter (1-2kb)  | 16      | 976084    | 979648   | 1532          | ENSG00000103227 | LMF1         |
| NR4A2_R848 | chr16   | 1215369   | 1215769  | Promoter (4-5kb)  | 16      | 1210608   | 1211448  | 4761          | ENSG00000196557 | CACNA1H      |
| NR4A2_R848 | chr16   | 1507551   | 1507951  | Promoter (1-2kb)  | 16      | 1506534   | 1510457  | 1017          | ENSG00000100726 | TELO2        |
| NR4A2_R848 | chr16   | 1727110   | 1727510  | Promoter (7-8kb)  | 16      | 1734985   | 1735066  | -7475         | ENSG00000265820 | MIR3177      |
| NR4A2_R848 | chr16   | 1745951   | 1746351  | Promoter (<=1kb)  | 16      | 1747068   | 1748800  | -717          | ENSG00000138834 | MAPK8IP3     |
| NR4A2_R848 | chr16   | 1818508   | 1818908  | Promoter (1-2kb)  | 16      | 1807577   | 1816907  | -1601         | ENSG00000063854 | HAGH         |
| NR4A2_R848 | chr16   | 1949429   | 1949829  | Promoter (4-5kb)  | 16      | 1943974   | 1954689  | 4860          | ENSG00000140986 | RPL3L        |
| NR4A2_R848 | chr16   | 2029038   | 2029438  | Promoter (<=1kb)  | 16      | 2029527   | 2038165  | -89           | ENSG00000065054 | SLC9A3R2     |
| NR4A2_R848 | chr16   | 2075255   | 2075655  | Promoter (<=1kb)  | 16      | 2076137   | 2076665  | -482          | ENSG00000103197 | TSC2         |
| NR4A2_R848 | chr16   | 2104147   | 2104547  | Promoter (<=1kb)  | 16      | 2099078   | 2103793  | -354          | ENSG00000008710 | PKD1         |
| NR4A2_R848 | chr16   | 2160148   | 2160548  | Promoter (2-3kb)  | 16      | 2163542   | 2171356  | -2994         | ENSG00000131653 | TRAF7        |
| NR4A2_R848 | chr16   | 2444124   | 2444524  | Promoter (<=1kb)  | 16      | 2443701   | 2449875  | 423           | ENSG00000162063 | CCNF         |
| NR4A2_R848 | chr16   | 2497854   | 2498254  | Promoter (<=1kb)  | 16      | 2498322   | 2505733  | -68           | ENSG00000162065 | TBC1D24      |
| NR4A2_R848 | chr16   | 2974257   | 2974657  | Promoter (<=1kb)  | 16      | 2972793   | 2974268  | 0             | ENSG00000127564 | PKMYT1       |
| NR4A2_R848 | chr16   | 3197884   | 3198293  | Promoter (9-10kb) | 16      | 3188212   | 3224779  | 9672          | ENSG00000168124 | OR1F1        |
| NR4A2_R848 | chr16   | 8591047   | 8591588  | Promoter (<=1kb)  | 16      | 8569500   | 8590193  | -854          | ENSG00000232258 | TMEM114      |
| NR4A2_R848 | chr16   | 10039957  | 10040357 | Promoter (8-9kb)  | 16      | 9938153   | 10031580 | -8377         | ENSG00000183454 | GRIN2A       |
| NR4A2_R848 | chr16   | 10859142  | 10859542 | Promoter (6-7kb)  | 16      | 10866222  | 10902104 | -6680         | ENSG00000179583 | CIITA        |
| NR4A2_R848 | chr16   | 11485731  | 11486131 | Promoter (5-6kb)  | 16      | 11442191  | 11491755 | 5624          | ENSG00000188897 | LOC400499    |
| NR4A2_R848 | chr16   | 27305990  | 27306390 | Promoter (7-8kb)  | 16      | 27313668  | 27345020 | -7278         | ENSG00000077238 | IL4R         |
| NR4A2_R848 | chr16   | 27726358  | 27726758 | Promoter (7-8kb)  | 16      | 27708421  | 27718806 | -7552         | NA              | LOC100128079 |
| NR4A2_R848 | chr16   | 28501298  | 28501698 | Promoter (5-6kb)  | 16      | 28499362  | 28506834 | 5136          | ENSG00000197272 | IL27         |
| NR4A2_R848 | chr16   | 30045324  | 30045806 | Promoter (7-8kb)  | 16      | 30035423  | 30052923 | 7117          | ENSG00000149926 | TLCD3B       |
| NR4A2_R848 | chr16   | 30062102  | 30062502 | Promoter (1-2kb)  | 16      | 30064164  | 30064840 | -1662         | ENSG00000285043 | LOC112694756 |
| NR4A2_R848 | chr16   | 33337639  | 33338340 | Promoter (7-8kb)  | 16      | 33206431  | 33330342 | -7297         | NA              | LOC105369266 |
| NR4A2_R848 | chr16   | 46729809  | 46730209 | Promoter (<=1kb)  | 16      | 46727238  | 46729937 | 0             | ENSG00000140795 | MYLK3        |
| NR4A2_R848 | chr16   | 46915301  | 46915701 | Promoter (<=1kb)  | 16      | 46915298  | 46929007 | 3             | ENSG00000166123 | GPT2         |
| NR4A2_R848 | chr16   | 47854143  | 47854797 | Promoter (3-4kb)  | 16      | 47858579  | 47908431 | -3782         | ENSG00000261231 | LINC02133    |
| NR4A2_R848 | chr16   | 48250146  | 48250546 | Promoter (2-3kb)  | 16      | 48224348  | 48247568 | -2578         | ENSG00000121270 | ABCC11       |
| NR4A2_R848 | chr16   | 50298060  | 50298460 | Promoter (2-3kb)  | 16      | 50300820  | 50301964 | -2360         | ENSG00000121281 | ADCY7        |
| NR4A2_R848 | chr16   | 55651651  | 55652186 | Promoter (3-4kb)  | 16      | 55655604  | 55702346 | -3418         | ENSG00000103546 | SLC6A2       |
| NR4A2_R848 | chr16   | 56331427  | 56331827 | Promoter (2-3kb)  | 16      | 56328661  | 56356347 | 2766          | ENSG00000087258 | GNAO1        |
| NR4A2_R848 | chr16   | 57070688  | 57071088 | Promoter (<=1kb)  | 16      | 57069877  | 57077369 | 811           | ENSG00000140853 | NLRC5        |
| NR4A2_R848 | chr16   | 57568709  | 57569109 | Promoter (5-6kb)  | 16      | 57574816  | 57591681 | -5707         | ENSG00000159618 | ADGRG5       |
| NR4A2_R848 | chr16   | 57569165  | 57569576 | Promoter (5-6kb)  | 16      | 57574816  | 57591681 | -5240         | ENSG00000159618 | ADGRG5       |
| NR4A2_R848 | chr16   | 57664041  | 57664441 | Promoter (3-4kb)  | 16      | 57668277  | 57678282 | -3836         | ENSG00000182885 | ADGRG3       |
| NR4A2_R848 | chr16   | 57705953  | 57706518 | Promoter (1-2kb)  | 16      | 57704907  | 57707861 | 1046          | ENSG00000159625 | DRC7         |
| NR4A2_R848 | chr16   | 57952998  | 57953398 | Promoter (6-7kb)  | 16      | 57931765  | 57946625 | -6373         | ENSG00000070729 | CNGB1        |
| NR4A2_R848 | chr16   | 66379654  | 66380054 | Promoter (<=1kb)  | 16      | 66379225  | 66392985 | 429           | ENSG00000179776 | CDH5         |
| NR4A2_R848 | chr16   | 67949216  | 67949616 | Promoter (<=1kb)  | 16      | 67948061  | 67950112 | 496           | ENSG00000124067 | SLC12A4      |
| NR4A2_R848 | chr16   | 67950435  | 67950835 | Promoter (<=1kb)  | 16      | 67948061  | 67950112 | -323          | ENSG00000124067 | SLC12A4      |
| NR4A2_R848 | chr16   | 68232395  | 68232795 | Promoter (<=1kb)  | 16      | 68231967  | 68232506 | 0             | ENSG00000103067 | ESRP2        |
| NR4A2_R848 | chr16   | 69914208  | 69914608 | Promoter (2-3kb)  | 16      | 69917583  | 69940176 | -2975         | ENSG00000198373 | WWP2         |
| NR4A2_R848 | chr16   | 69938976  | 69939376 | Promoter (2-3kb)  | 16      | 69936920  | 69939397 | 2056          | ENSG00000198373 | WWP2         |
| NR4A2_R848 | chr16   | 70450892  | 70451292 | Promoter (3-4kb)  | 16      | 70454595  | 70466206 | -3303         | ENSG00000157353 | FCSK         |
| NR4A2_R848 | chr16   | 70479128  | 70479528 | Promoter (1-2kb)  | 16      | 70477358  | 70480274 | 1770          | ENSG00000157353 | FCSK         |
| NR4A2_R848 | chr16   | 70482986  | 70483498 | Promoter (<=1kb)  | 16      | 70480867  | 70482794 | -192          | ENSG00000103051 | COG4         |
| NR4A2_R848 | chr16   | 70644890  | 70645290 | Promoter (1-2kb)  | 16      | 70646563  | 70656671 | -1273         | ENSG00000157368 | IL34         |
| NR4A2_R848 | chr16   | 71437241  | 71437641 | Promoter (4-5kb)  | 16      | 71430262  | 71442060 | 4419          | ENSG00000260734 | TLE7         |
| NR4A2_R848 | chr16   | 71441751  | 71442151 | Promoter (<=1kb)  | 16      | 71430262  | 71442060 | 0             | ENSG00000260734 | TLE7         |
| NR4A2_R848 | chr16   | 79722723  | 79723146 | Promoter (8-9kb)  | 16      | 79713847  | 79799090 | 8876          | ENSG00000260876 | LINC01229    |
| NR4A2_R848 | chr16   | 81537105  | 81537505 | Promoter (3-4kb)  | 16      | 81533902  | 81533966 | 3203          | ENSG00000277255 | MIR7854      |
| NR4A2_R848 | chr16   | 83921016  | 83921416 | Promoter (9-10kb) | 16      | 83931311  | 83957650 | -9895         | ENSG00000140961 | OSGIN1       |
| NR4A2_R848 | chr16   | 83967499  | 83967899 | Promoter (<=1kb)  | 16      | 83968632  | 84002776 | -733          | ENSG00000103154 | NECAB2       |
| NR4A2_R848 | chr16   | 83974669  | 83975069 | Promoter (3-4kb)  | 16      | 83971451  | 84002776 | 3218          | ENSG00000103154 | NECAB2       |
| NR4A2_R848 | chr16   | 84204928  | 84205328 | Promoter (7-8kb)  | 16      | 84192558  | 84197053 | -7875         | ENSG00000250685 | LOC654780    |
| NR4A2_R848 | chr16   | 85023653  | 85024053 | Promoter (3-4kb)  | 16      | 85027751  | 85094220 | -3698         | ENSG00000135709 | KIAA0513     |
| NR4A2_R848 | chr16   | 85089212  | 85089612 | Promoter (2-3kb)  | 16      | 85086914  | 85088755 | 2298          | ENSG00000135709 | KIAA0513     |
| NR4A2_R848 | chr16   | 86587420  | 86588032 | Promoter (8-9kb)  | 16      | 86578506  | 86582160 | 8914          | ENSG00000176678 | FOXL1        |
| NR4A2_R848 | chr16   | 87210059  | 87210584 | Promoter (1-2kb)  | 16      | 87212122  | 87226430 | -1538         | ENSG00000261095 | LOC101928708 |
| NR4A2_R848 | chr16   | 87221976  | 87222608 | Promoter (9-10kb) | 16      | 87212122  | 87226430 | 9854          | ENSG00000261095 | LOC101928708 |
| NR4A2_R848 | chr16   | 87502368  | 87502768 | Promoter (8-9kb)  | 16      | 87494187  | 87515635 | 8181          | ENSG00000288568 | LOC101928737 |
| NR4A2_R848 | chr16   | 87597269  | 87597669 | Promoter (4-5kb)  | 16      | 87601835  | 87697927 | -4166         | ENSG00000154118 | JPH3         |
| NR4A2_R848 | chr16   | 87700546  | 87700946 | Promoter (7-8kb)  | 16      | 87703026  | 87708387 | 7441          | ENSG00000104731 | KLHDC4       |
| NR4A2_R848 | chr16   | 88015167  | 88015567 | Promoter (1-2kb)  | 16      | 88017190  | 88033219 | -1623         | ENSG00000172530 | BANP         |
| NR4A2_R848 | chr16   | 88091260  | 88091660 | Promoter (9-10kb) | 16      | 88088041  | 88100959 | 9299          | ENSG00000205037 | LOC400553    |
| NR4A2_R848 | chr16   | 88192887  | 88193309 | Promoter (<=1kb)  | 16      | 88194281  | 88195217 | -972          | ENSG00000260420 | LINC02182    |
| NR4A2_R848 | chr16   | 88470738  | 88471138 | Promoter (1-2kb)  | 16      | 88468918  | 88469031 | 1820          | ENSG00000263456 | MIR5189      |
| NR4A2_R848 | chr16   | 88831673  | 88832073 | Promoter (4-5kb)  | 16      | 88824789  | 88827116 | -4557         | ENSG00000141012 | GALNS        |
| NR4A2_R848 | chr16   | 88979961  | 88980361 | Promoter (2-3kb)  | 16      | 88874858  | 88977207 | -2754         | ENSG00000129993 | CBFA2T3      |
| NR4A2_R848 | chr16   | 89278764  | 89279164 | Promoter (3-4kb)  | 16      | 89274735  | 89275118 | -3646         | ENSG00000167522 | ANKRD11      |
| NR4A2_R848 | chr16   | 89579505  | 89579905 | Promoter (3-4kb)  | 16      | 89575782  | 89583714 | 3723          | ENSG00000178773 | CPNE7        |
| NR4A2_R848 | chr16   | 89580827  | 89581361 | Promoter (3-4kb)  | 16      | 89584821  | 89587732 | -3460         | ENSG00000178773 | CPNE7        |
| NR4A2_R848 | chr16   | 89583565  | 89583965 | Promoter (<=1kb)  | 16      | 89584821  | 89587732 | -856          | ENSG00000178773 | CPNE7        |
| NR4A2_R848 | chr16   | 89744934  | 89745334 | Promoter (<=1kb)  | 16      | 89738630  | 89745062 | 0             | ENSG00000187741 | FANCA        |
| NR4A2_R848 | chr16   | 89907779  | 89908179 | Promoter (<=1kb)  | 16      | 89908966  | 89911379 | -787          | ENSG00000141002 | TCF25        |
| NR4A2_R848 | chr16   | 89908415  | 89908841 | Promoter (<=1kb)  | 16      | 89908966  | 89911379 | -125          | ENSG00000141002 | TCF25        |
| NR4A2_R848 | chr16   | 89914761  | 89915161 | Promoter (2-3kb)  | 16      | 89917879  | 89920977 | -2718         | ENSG00000258839 | MC1R         |
| NR4A2_R848 | chr16   | 89989739  | 89990139 | Promoter (<=1kb)  | 16      | 89990332  | 89996610 | -193          | ENSG00000223959 | AFG3L1P      |
| NR4A2_R848 | chr17   | 3547433   | 3547833  | Promoter (<=1kb)  | 17      | 3510503   | 3546715  | -718          | ENSG00000167723 | TRPV3        |
| NR4A2_R848 | chr17   | 3549857   | 3550257  | Promoter (3-4kb)  | 17      | 3510503   | 3546715  | -3142         | ENSG00000167723 | TRPV3        |
| NR4A2_R848 | chr17   | 3853338   | 3853738  | Promoter (7-8kb)  | 17      | 3802158   | 3846246  | -7092         | ENSG00000074356 | NCBP3        |
| NR4A2_R848 | chr17   | 3925525   | 3925925  | Promoter (2-3kb)  | 17      | 3925047   | 3928620  | 2695          | ENSG00000074370 | ATP2A3       |
| NR4A2_R848 | chr17   | 4543563   | 4543963  | Promoter (<=1kb)  | 17</    |           |          |               |                 |              |



| Condition  | peakChr | peakStart | peakEnd  | annotation        | geneChr | geneStart | geneEnd  | distanceToTSS | geneID          | geneSymbol   |
|------------|---------|-----------|----------|-------------------|---------|-----------|----------|---------------|-----------------|--------------|
| NR4A2_R848 | chr17   | 10846633  | 10847057 | Promoter (8-9kb)  | 17      | 10794906  | 10838094 | -8539         | ENSG00000263429 | TMEM238L     |
| NR4A2_R848 | chr17   | 15465432  | 15465832 | Promoter (1-2kb)  | 17      | 15436015  | 15467621 | 1789          | ENSG00000239704 | CDRT4        |
| NR4A2_R848 | chr17   | 16319901  | 16320301 | Promoter (2-3kb)  | 17      | 16317391  | 16325904 | 2510          | ENSG00000108474 | PIGL         |
| NR4A2_R848 | chr17   | 16456022  | 16456422 | Promoter (7-8kb)  | 17      | 16441577  | 16448294 | -7728         | ENSG00000181350 | LRRRC75A     |
| NR4A2_R848 | chr17   | 17142505  | 17142905 | Promoter (6-7kb)  | 17      | 17136338  | 17143669 | 6167          | ENSG00000133030 | MPRIP        |
| NR4A2_R848 | chr17   | 17166860  | 17167260 | Promoter (1-2kb)  | 17      | 17165556  | 17185560 | 1304          | ENSG00000133030 | MPRIP        |
| NR4A2_R848 | chr17   | 17800334  | 17800734 | Promoter (1-2kb)  | 17      | 17798384  | 17804114 | 1950          | ENSG00000108557 | RAI1         |
| NR4A2_R848 | chr17   | 21053455  | 21053855 | Promoter (9-10kb) | 17      | 21002972  | 21043760 | -9695         | ENSG00000124422 | USP22        |
| NR4A2_R848 | chr17   | 22401618  | 22402156 | Promoter (3-4kb)  | 17      | 22406019  | 22413744 | -3863         | ENSG00000276399 | FLJ36000     |
| NR4A2_R848 | chr17   | 28960761  | 28961161 | Promoter (<=1kb)  | 17      | 28960240  | 28960973 | 0             | ENSG00000063015 | SEZ6         |
| NR4A2_R848 | chr17   | 29525267  | 29525667 | Promoter (2-3kb)  | 17      | 29522288  | 29530738 | 2979          | ENSG00000160551 | TAK1         |
| NR4A2_R848 | chr17   | 31429757  | 31430157 | Promoter (1-2kb)  | 17      | 31431559  | 31521223 | -1402         | ENSG00000131242 | RAB11FIP4    |
| NR4A2_R848 | chr17   | 39143658  | 39144058 | Promoter (7-8kb)  | 17      | 39067130  | 39151519 | 7461          | ENSG00000161381 | PLXDC1       |
| NR4A2_R848 | chr17   | 39626751  | 39627151 | Promoter (<=1kb)  | 17      | 39626952  | 39634084 | 0             | ENSG00000131771 | PPP1R1B      |
| NR4A2_R848 | chr17   | 39685302  | 39685702 | Promoter (<=1kb)  | 17      | 39673529  | 39684905 | -397          | ENSG00000161395 | PGAP3        |
| NR4A2_R848 | chr17   | 39745266  | 39745666 | Promoter (1-2kb)  | 17      | 39743272  | 39744428 | 1994          | ENSG00000141738 | GRB7         |
| NR4A2_R848 | chr17   | 40087204  | 40087604 | Promoter (2-3kb)  | 17      | 40084434  | 40087001 | 2770          | ENSG00000126351 | THRA         |
| NR4A2_R848 | chr17   | 41614157  | 41614557 | Promoter (1-2kb)  | 17      | 41610409  | 41612899 | -1258         | ENSG00000186832 | KRT16        |
| NR4A2_R848 | chr17   | 41993889  | 41994289 | Promoter (1-2kb)  | 17      | 41989421  | 41992782 | -1107         | ENSG00000168259 | DNAJC7       |
| NR4A2_R848 | chr17   | 43032605  | 43033005 | Promoter (7-8kb)  | 17      | 43025241  | 43026253 | 7364          | ENSG00000108830 | RND2         |
| NR4A2_R848 | chr17   | 43537419  | 43537819 | Promoter (6-7kb)  | 17      | 43528499  | 43530434 | -6985         | ENSG00000175832 | ETV4         |
| NR4A2_R848 | chr17   | 44642354  | 44642754 | Promoter (7-8kb)  | 17      | 44646364  | 44650349 | 7595          | ENSG00000266979 | LINC01180    |
| NR4A2_R848 | chr17   | 44836620  | 44837020 | Promoter (5-6kb)  | 17      | 44805507  | 44830816 | -5804         | ENSG00000182963 | GJC1         |
| NR4A2_R848 | chr17   | 45126223  | 45126623 | Promoter (5-6kb)  | 17      | 45108959  | 45132515 | 5892          | ENSG00000161714 | PLCD3        |
| NR4A2_R848 | chr17   | 47681045  | 47681445 | Promoter (<=1kb)  | 17      | 47680603  | 47684511 | 442           | ENSG00000108424 | KPNB1        |
| NR4A2_R848 | chr17   | 48158066  | 48158466 | Promoter (1-2kb)  | 17      | 48156427  | 48156511 | -1555         | ENSG00000221739 | MIR1203      |
| NR4A2_R848 | chr17   | 48786830  | 48787230 | Promoter (7-8kb)  | 17      | 48786249  | 48794294 | 7064          | ENSG00000170703 | TTL6         |
| NR4A2_R848 | chr17   | 48886726  | 48887126 | Promoter (5-6kb)  | 17      | 48892765  | 48895871 | -5639         | ENSG00000159199 | ATP5MC1      |
| NR4A2_R848 | chr17   | 50265839  | 50266239 | Promoter (5-6kb)  | 17      | 50271406  | 50281485 | -5167         | ENSG00000167105 | TMEM92       |
| NR4A2_R848 | chr17   | 50589740  | 50590140 | Promoter (9-10kb) | 17      | 50599725  | 50607510 | -9585         | ENSG00000006283 | CACNA1G      |
| NR4A2_R848 | chr17   | 50836537  | 50836937 | Promoter (<=1kb)  | 17      | 50835586  | 50842353 | 951           | ENSG00000173714 | WFIKN2       |
| NR4A2_R848 | chr17   | 56792543  | 56793080 | Promoter (2-3kb)  | 17      | 56791913  | 56795292 | 2212          | ENSG00000214226 | C17orf67     |
| NR4A2_R848 | chr17   | 60155189  | 60155589 | Promoter (2-3kb)  | 17      | 60157732  | 60159546 | -2143         | ENSG00000167434 | CA4          |
| NR4A2_R848 | chr17   | 60163878  | 60164278 | Promoter (5-6kb)  | 17      | 60158108  | 60158964 | 5770          | ENSG00000167434 | CA4          |
| NR4A2_R848 | chr17   | 62430600  | 62431000 | Promoter (3-4kb)  | 17      | 62434861  | 62440756 | -3861         | ENSG00000087995 | METTL2A      |
| NR4A2_R848 | chr17   | 63500760  | 63501160 | Promoter (4-5kb)  | 17      | 63496140  | 63496985 | 4620          | ENSG00000159640 | ACE          |
| NR4A2_R848 | chr17   | 63938586  | 63938986 | Promoter (6-7kb)  | 17      | 63928740  | 63932354 | -6232         | ENSG00000007312 | CD79B        |
| NR4A2_R848 | chr17   | 63956244  | 63956644 | Promoter (5-6kb)  | 17      | 63959373  | 63961693 | 5049          | ENSG00000007314 | SCN4A        |
| NR4A2_R848 | chr17   | 64267970  | 64268370 | Promoter (4-5kb)  | 17      | 64147687  | 64263301 | -4669         | ENSG00000136478 | TEX2         |
| NR4A2_R848 | chr17   | 65568160  | 65568560 | Promoter (6-7kb)  | 17      | 65528563  | 65561648 | -6512         | ENSG00000168646 | AXIN2        |
| NR4A2_R848 | chr17   | 66224482  | 66224882 | Promoter (3-4kb)  | 17      | 66216791  | 66228637 | 3755          | ENSG00000091583 | APOH         |
| NR4A2_R848 | chr17   | 67044094  | 67044494 | Promoter (<=1kb)  | 17      | 67044554  | 67056797 | -60           | ENSG00000108878 | CACNG1       |
| NR4A2_R848 | chr17   | 67054467  | 67054867 | Promoter (9-10kb) | 17      | 67044554  | 67056797 | 9913          | ENSG00000108878 | CACNG1       |
| NR4A2_R848 | chr17   | 73500637  | 73501037 | Promoter (6-7kb)  | 17      | 73504340  | 73507594 | 6557          | ENSG00000069188 | SDK2         |
| NR4A2_R848 | chr17   | 74340171  | 74340571 | Promoter (8-9kb)  | 17      | 74348590  | 74350481 | -8019         | ENSG00000196169 | KIF19        |
| NR4A2_R848 | chr17   | 74465522  | 74465922 | Promoter (<=1kb)  | 17      | 74466399  | 74484794 | -477          | ENSG00000167851 | CD300A       |
| NR4A2_R848 | chr17   | 74867003  | 74867403 | Promoter (1-2kb)  | 17      | 74866137  | 74868473 | 1070          | ENSG00000161513 | FDXR         |
| NR4A2_R848 | chr17   | 74971983  | 74972383 | Promoter (<=1kb)  | 17      | 74958976  | 74972716 | 333           | ENSG00000167861 | HID1         |
| NR4A2_R848 | chr17   | 75593466  | 75593866 | Promoter (<=1kb)  | 17      | 75594462  | 75595046 | -596          | ENSG00000266714 | MYO15B       |
| NR4A2_R848 | chr17   | 76277511  | 76277911 | Promoter (2-3kb)  | 17      | 76274184  | 76280357 | 2446          | ENSG00000129646 | QRICH2       |
| NR4A2_R848 | chr17   | 76840971  | 76841414 | Promoter (8-9kb)  | 17      | 76849840  | 76861836 | -8426         | ENSG00000267535 | LINC00868    |
| NR4A2_R848 | chr17   | 77329265  | 77329665 | Promoter (5-6kb)  | 17      | 77323706  | 77402455 | 5559          | ENSG00000184640 | SEPTIN9      |
| NR4A2_R848 | chr17   | 77470184  | 77470584 | Promoter (3-4kb)  | 17      | 77466403  | 77490859 | 3781          | ENSG00000184640 | SEPTIN9      |
| NR4A2_R848 | chr17   | 77484195  | 77484934 | Promoter (2-3kb)  | 17      | 77481913  | 77488788 | 2282          | ENSG00000184640 | SEPTIN9      |
| NR4A2_R848 | chr17   | 77718491  | 77718891 | Promoter (9-10kb) | 17      | 77722872  | 77728559 | 9668          | ENSG00000267790 | LINC01987    |
| NR4A2_R848 | chr17   | 78478105  | 78478737 | Promoter (5-6kb)  | 17      | 78423697  | 78472774 | -5331         | ENSG00000187775 | DNAH17       |
| NR4A2_R848 | chr17   | 79043080  | 79043480 | Promoter (<=1kb)  | 17      | 79043593  | 79048466 | -113          | ENSG00000173918 | C1QTNF1      |
| NR4A2_R848 | chr17   | 79175324  | 79175724 | Promoter (7-8kb)  | 17      | 79115698  | 79183472 | 7748          | ENSG00000167281 | RBFOX3       |
| NR4A2_R848 | chr17   | 79498697  | 79499097 | Promoter (9-10kb) | 17      | 79094257  | 79508868 | 9771          | ENSG00000167281 | RBFOX3       |
| NR4A2_R848 | chr17   | 80416070  | 80416470 | Promoter (<=1kb)  | 17      | 80415669  | 80430152 | 401           | ENSG00000173818 | ENDOV        |
| NR4A2_R848 | chr17   | 80700337  | 80700941 | Promoter (7-8kb)  | 17      | 80708933  | 80754104 | -7992         | ENSG00000141564 | RPTOR        |
| NR4A2_R848 | chr17   | 80930166  | 80930584 | Promoter (7-8kb)  | 17      | 80922724  | 80924172 | 7442          | ENSG00000141564 | RPTOR        |
| NR4A2_R848 | chr17   | 81078388  | 81078788 | Promoter (4-5kb)  | 17      | 81082989  | 81086464 | -4201         | ENSG00000175866 | BAIAP2       |
| NR4A2_R848 | chr17   | 81131266  | 81131666 | Promoter (<=1kb)  | 17      | 81110487  | 81131948 | 282           | ENSG00000181409 | AATK         |
| NR4A2_R848 | chr17   | 81138430  | 81138830 | Promoter (5-6kb)  | 17      | 81133196  | 81133308 | -5122         | ENSG00000221025 | MIR1250      |
| NR4A2_R848 | chr17   | 81169771  | 81170171 | Promoter (3-4kb)  | 17      | 81117295  | 81166221 | -3550         | ENSG00000181409 | AATK         |
| NR4A2_R848 | chr17   | 81249273  | 81249684 | Promoter (1-2kb)  | 17      | 81245004  | 81247635 | -1638         | ENSG00000157637 | SLC38A10     |
| NR4A2_R848 | chr17   | 81253785  | 81254185 | Promoter (1-2kb)  | 17      | 81246178  | 81252273 | -1512         | ENSG00000157637 | SLC38A10     |
| NR4A2_R848 | chr17   | 81531702  | 81532119 | Promoter (3-4kb)  | 17      | 81528532  | 81537080 | 3170          | ENSG00000186765 | FSCN2        |
| NR4A2_R848 | chr17   | 81535238  | 81535638 | Promoter (<=1kb)  | 17      | 81536146  | 81536956 | -508          | ENSG00000186765 | FSCN2        |
| NR4A2_R848 | chr17   | 82392344  | 82392744 | Promoter (<=1kb)  | 17      | 82392215  | 82393217 | 473           | ENSG00000181396 | OGFOD3       |
| NR4A2_R848 | chr17   | 82615732  | 82616132 | Promoter (1-2kb)  | 17      | 82616618  | 82617519 | 1387          | ENSG00000141580 | WDR45B       |
| NR4A2_R848 | chr17   | 82739634  | 82740034 | Promoter (3-4kb)  | 17      | 82736072  | 82749895 | 3562          | ENSG00000167363 | FN3K         |
| NR4A2_R848 | chr18   | 107988    | 108392   | Promoter (<=1kb)  | 18      | 109065    | 122219   | -673          | ENSG00000263006 | ROCK1P1      |
| NR4A2_R848 | chr18   | 110202    | 110609   | Promoter (1-2kb)  | 18      | 109065    | 122219   | 1137          | ENSG00000263006 | ROCK1P1      |
| NR4A2_R848 | chr18   | 588686    | 589086   | Promoter (7-8kb)  | 18      | 596988    | 619320   | -7902         | ENSG00000079101 | CLUL1        |
| NR4A2_R848 | chr18   | 6920094   | 6920494  | Promoter (6-7kb)  | 18      | 6925477   | 6926990  | 6496          | ENSG00000265933 | LINC00668    |
| NR4A2_R848 | chr18   | 10755826  | 10756460 | Promoter (3-4kb)  | 18      | 10759584  | 10759649 | 3189          | ENSG00000274838 | MIR6788      |
| NR4A2_R848 | chr18   | 13232083  | 13232483 | Promoter (7-8kb)  | 18      | 13239543  | 13242076 | -7060         | ENSG00000279020 | C18orf15     |
| NR4A2_R848 | chr18   | 26588123  | 26588523 | Promoter (3-4kb)  | 18      | 26591467  | 26591535 | 3012          | ENSG00000276221 | MIR8057      |
| NR4A2_R848 | chr18   | 26593422  | 26593822 | Promoter (1-2kb)  | 18      | 26591467  | 26591535 | -1887         | ENSG00000276221 | MIR8057      |
| NR4A2_R848 | chr18   | 36717271  | 36717671 | Promoter (<=1kb)  | 18      | 36718557  | 36780055 | -886          | ENSG00000134775 | FHOD3        |
| NR4A2_R848 | chr18   | 37263463  | 37263863 | Promoter (<=1kb)  | 18      | 37245004  | 37264754 | 891           | ENSG00000101489 | CELF4        |
| NR4A2_R848 | chr18   | 37283769  | 37284169 | Promoter (9-10kb) | 18      | 37274460  | 37276400 | 9309          | ENSG00000267202 | LOC105372068 |
| NR4A2_R848 | chr18   | 48138995  | 48139395 | Promoter (1-2kb)  | 18      | 48026673  | 48137361 | -1634         | ENSG00000184828 | ZBTB7C       |
| NR4A2_R848 | chr18   | 76531748  | 76532148 | Promoter (<=1kb)  | 18      | 76532380  | 76558493 | -232          | ENSG00000266256 | LINC00908    |
| NR4A2_R848 | chr18   | 77258513  | 77258913 | Promoter (4-5kb)  | 18      | 77253740  | 77256217 | 4773          | ENSG00000166573 | GALR1        |
| NR4A2_R848 | chr18   | 79296943  | 79297343 | Promoter (2-3kb)  | 18      | 79299899  | 79329213 | -2556         | ENSG00000166377 | ATP9B        |
| NR4A2_R848 | chr18   | 79409077  | 79409477 | Promoter (8-9kb)  | 18      | 79400392  | 79527577 | 8685          | ENSG00000131196 | NFATC1       |
| NR4A2_R848 | chr18   | 79909331  | 79909731 | Promoter (6-7kb)  | 18      | 79903894  | 79915961 | 6230          | ENSG00000122490 | SLC66A2      |
| NR4A2_R848 | chr19   | 380665    | 381065   | Promoter (4-5kb)  | 19      | 361747    | 376026   | -4639         | ENSG00000105549 | THEG         |
| NR4A2_R848 | chr19   | 414776    | 415176   | Promoter (4-5kb)  | 19      | 416589    | 419879   | 4703          | ENSG00000129946 | SHC2         |
| NR4A2_R848 | chr19   | 426640    | 427151   | Promoter (3-4kb)  | 19      | 416589    |          |               |                 |              |

| Condition  | peakChr | peakStart | peakEnd  | annotation        | geneChr | geneStart | geneEnd  | distanceToTSS | geneID          | geneSymbol |
|------------|---------|-----------|----------|-------------------|---------|-----------|----------|---------------|-----------------|------------|
| NR4A2_R848 | chr19   | 2345926   | 2346326  | Promoter (3-4kb)  | 19      | 2342722   | 2353567  | 3204          | ENSG00000005206 | SPPL2B     |
| NR4A2_R848 | chr19   | 2357170   | 2357878  | Promoter (2-3kb)  | 19      | 2360238   | 2426239  | -2360         | ENSG00000178297 | TMPRSS9    |
| NR4A2_R848 | chr19   | 2362368   | 2362768  | Promoter (2-3kb)  | 19      | 2360238   | 2426239  | 2130          | ENSG00000178297 | TMPRSS9    |
| NR4A2_R848 | chr19   | 3120181   | 3120581  | Promoter (1-2kb)  | 19      | 3118813   | 3119353  | 1368          | ENSG00000088256 | GNL11      |
| NR4A2_R848 | chr19   | 3197397   | 3197797  | Promoter (1-2kb)  | 19      | 3198841   | 3209575  | -1044         | ENSG00000125912 | NCLN       |
| NR4A2_R848 | chr19   | 3235452   | 3235886  | Promoter (9-10kb) | 19      | 3225485   | 3297016  | 9967          | ENSG00000161082 | CELF5      |
| NR4A2_R848 | chr19   | 3278287   | 3278687  | Promoter (3-4kb)  | 19      | 3282257   | 3286791  | -3570         | ENSG00000161082 | CELF5      |
| NR4A2_R848 | chr19   | 3292606   | 3293006  | Promoter (7-8kb)  | 19      | 3284762   | 3293401  | 7844          | ENSG00000161082 | CELF5      |
| NR4A2_R848 | chr19   | 3309966   | 3310796  | Promoter (3-4kb)  | 19      | 3314403   | 3469217  | -3607         | ENSG00000141905 | NFIC       |
| NR4A2_R848 | chr19   | 3322046   | 3322446  | Promoter (7-8kb)  | 19      | 3314403   | 3469217  | 7643          | ENSG00000141905 | NFIC       |
| NR4A2_R848 | chr19   | 3322809   | 3323209  | Promoter (8-9kb)  | 19      | 3314403   | 3469217  | 8406          | ENSG00000141905 | NFIC       |
| NR4A2_R848 | chr19   | 3406749   | 3407149  | Promoter (3-4kb)  | 19      | 3410596   | 3425147  | -3447         | ENSG00000141905 | NFIC       |
| NR4A2_R848 | chr19   | 3476743   | 3477143  | Promoter (1-2kb)  | 19      | 3474407   | 3478488  | 1345          | ENSG00000095932 | SMIM24     |
| NR4A2_R848 | chr19   | 3477469   | 3477869  | Promoter (<=1kb)  | 19      | 3474407   | 3478488  | 619           | ENSG00000095932 | SMIM24     |
| NR4A2_R848 | chr19   | 3529096   | 3529791  | Promoter (2-3kb)  | 19      | 3532483   | 3533748  | -2692         | ENSG00000105325 | FZR1       |
| NR4A2_R848 | chr19   | 3530420   | 3530820  | Promoter (1-2kb)  | 19      | 3532483   | 3533748  | -1663         | ENSG00000105325 | FZR1       |
| NR4A2_R848 | chr19   | 3623374   | 3623774  | Promoter (2-3kb)  | 19      | 3611568   | 3621028  | -2346         | ENSG00000105298 | CACTIN     |
| NR4A2_R848 | chr19   | 3629713   | 3630113  | Promoter (2-3kb)  | 19      | 3610660   | 3626815  | -2898         | ENSG00000105298 | CACTIN     |
| NR4A2_R848 | chr19   | 3694860   | 3695260  | Promoter (5-6kb)  | 19      | 3636601   | 3700390  | 5130          | ENSG00000186111 | PIP5K1C    |
| NR4A2_R848 | chr19   | 3776383   | 3776783  | Promoter (4-5kb)  | 19      | 3769089   | 3772221  | -4162         | ENSG00000173976 | RAX2       |
| NR4A2_R848 | chr19   | 3923705   | 3924105  | Promoter (8-9kb)  | 19      | 3933103   | 3942414  | -8998         | ENSG00000077009 | NMRK2      |
| NR4A2_R848 | chr19   | 3952712   | 3953112  | Promoter (8-9kb)  | 19      | 3959639   | 3961159  | 8047          | ENSG00000167657 | DAPK3      |
| NR4A2_R848 | chr19   | 4017386   | 4017786  | Promoter (<=1kb)  | 19      | 4018435   | 4028786  | -649          | ENSG00000105229 | PIAS4      |
| NR4A2_R848 | chr19   | 4127634   | 4128034  | Promoter (3-4kb)  | 19      | 4090321   | 4124129  | -3505         | ENSG00000126934 | MAP2K2     |
| NR4A2_R848 | chr19   | 4145374   | 4145774  | Promoter (7-8kb)  | 19      | 4153631   | 4173054  | -7857         | ENSG00000060566 | CREB3L3    |
| NR4A2_R848 | chr19   | 4334644   | 4335371  | Promoter (3-4kb)  | 19      | 4325459   | 4338809  | 3438          | ENSG00000178078 | STAP2      |
| NR4A2_R848 | chr19   | 4381274   | 4381674  | Promoter (<=1kb)  | 19      | 4363853   | 4380292  | -982          | ENSG00000141985 | SH3GL1     |
| NR4A2_R848 | chr19   | 4492689   | 4493089  | Promoter (3-4kb)  | 19      | 4496333   | 4502104  | -3244         | ENSG00000167674 | HDGFL2     |
| NR4A2_R848 | chr19   | 4500085   | 4500485  | Promoter (<=1kb)  | 19      | 4499629   | 4501578  | 456           | ENSG00000167674 | HDGFL2     |
| NR4A2_R848 | chr19   | 4553683   | 4554083  | Promoter (4-5kb)  | 19      | 4542914   | 4558457  | 4374          | ENSG00000167680 | SEMA6B     |
| NR4A2_R848 | chr19   | 4662955   | 4663464  | Promoter (1-2kb)  | 19      | 4641374   | 4664906  | 1442          | ENSG00000074842 | MYDGF      |
| NR4A2_R848 | chr19   | 5018973   | 5019373  | Promoter (2-3kb)  | 19      | 5016325   | 5153105  | 2648          | ENSG00000127663 | KDM4B      |
| NR4A2_R848 | chr19   | 5019706   | 5020106  | Promoter (3-4kb)  | 19      | 5016325   | 5153105  | 3381          | ENSG00000127663 | KDM4B      |
| NR4A2_R848 | chr19   | 5566370   | 5566770  | Promoter (1-2kb)  | 19      | 5561632   | 5567831  | 1061          | ENSG00000223573 | TINCR      |
| NR4A2_R848 | chr19   | 5568746   | 5569146  | Promoter (<=1kb)  | 19      | 5558167   | 5568034  | -712          | ENSG00000223573 | TINCR      |
| NR4A2_R848 | chr19   | 5673697   | 5674097  | Promoter (<=1kb)  | 19      | 5674947   | 5691667  | -850          | ENSG00000130255 | RPL36      |
| NR4A2_R848 | chr19   | 6222365   | 6222765  | Promoter (5-6kb)  | 19      | 6213120   | 6216968  | -5397         | ENSG00000130382 | MLLT1      |
| NR4A2_R848 | chr19   | 6224525   | 6224925  | Promoter (7-8kb)  | 19      | 6213120   | 6216968  | -7557         | ENSG00000130382 | MLLT1      |
| NR4A2_R848 | chr19   | 6488663   | 6489063  | Promoter (6-7kb)  | 19      | 6477218   | 6482557  | -6106         | ENSG00000205744 | DENND1C    |
| NR4A2_R848 | chr19   | 6529316   | 6529716  | Promoter (1-2kb)  | 19      | 6531026   | 6535924  | -1310         | ENSG00000125657 | TNFSF9     |
| NR4A2_R848 | chr19   | 6709932   | 6710425  | Promoter (<=1kb)  | 19      | 6709756   | 6710957  | 532           | ENSG00000125730 | C3         |
| NR4A2_R848 | chr19   | 7152935   | 7153504  | Promoter (9-10kb) | 19      | 7141510   | 7143040  | -9895         | ENSG00000171105 | INSR       |
| NR4A2_R848 | chr19   | 7518569   | 7518969  | Promoter (2-3kb)  | 19      | 7516103   | 7521025  | 2466          | ENSG00000198816 | ZNF358     |
| NR4A2_R848 | chr19   | 7626214   | 7626614  | Promoter (1-2kb)  | 19      | 7619526   | 7628270  | 1656          | ENSG00000076924 | XAB2       |
| NR4A2_R848 | chr19   | 7691901   | 7692301  | Promoter (7-8kb)  | 19      | 7688758   | 7699479  | 7178          | ENSG00000104921 | FCER2      |
| NR4A2_R848 | chr19   | 8106837   | 8107237  | Promoter (4-5kb)  | 19      | 8110888   | 8111806  | 4569          | ENSG00000142449 | FBN3       |
| NR4A2_R848 | chr19   | 8248425   | 8248873  | Promoter (1-2kb)  | 19      | 8250526   | 8262418  | -1653         | ENSG00000090661 | CERS4      |
| NR4A2_R848 | chr19   | 8351747   | 8352147  | Promoter (8-9kb)  | 19      | 8333217   | 8343262  | -8485         | ENSG00000186994 | KANK3      |
| NR4A2_R848 | chr19   | 8867280   | 8867680  | Promoter (<=1kb)  | 19      | 8863316   | 8867014  | -266          | ENSG00000181143 | MUC16      |
| NR4A2_R848 | chr19   | 9676011   | 9676411  | Promoter (<=1kb)  | 19      | 9641807   | 9675100  | -911          | ENSG00000171466 | ZNF562     |
| NR4A2_R848 | chr19   | 9966708   | 9967108  | Promoter (1-2kb)  | 19      | 9967573   | 9968887  | 1779          | ENSG00000080573 | COL5A3     |
| NR4A2_R848 | chr19   | 10006616  | 10007016 | Promoter (3-4kb)  | 19      | 9959561   | 10010504 | 3488          | ENSG00000080573 | COL5A3     |
| NR4A2_R848 | chr19   | 10675763  | 10676163 | Promoter (1-2kb)  | 19      | 10677205  | 10681314 | -1042         | ENSG00000129351 | ILF3       |
| NR4A2_R848 | chr19   | 10694123  | 10694523 | Promoter (6-7kb)  | 19      | 10687605  | 10692398 | 6518          | ENSG00000129351 | ILF3       |
| NR4A2_R848 | chr19   | 10926065  | 10926465 | Promoter (1-2kb)  | 19      | 10922835  | 10924147 | -1918         | ENSG00000130733 | YIPF2      |
| NR4A2_R848 | chr19   | 11146449  | 11146849 | Promoter (8-9kb)  | 19      | 11147134  | 11155761 | 8912          | ENSG00000161888 | SPC24      |
| NR4A2_R848 | chr19   | 11358499  | 11358899 | Promoter (<=1kb)  | 19      | 11357696  | 11359894 | 803           | ENSG00000105520 | PLPPR2     |
| NR4A2_R848 | chr19   | 11648902  | 11649302 | Promoter (9-10kb) | 19      | 11639776  | 11686569 | 9126          | NA              | ZNF833P    |
| NR4A2_R848 | chr19   | 11658330  | 11658730 | Promoter (8-9kb)  | 19      | 11666069  | 11667030 | 8300          | ENSG00000214223 | HNRNPA1P10 |
| NR4A2_R848 | chr19   | 11676911  | 11677311 | Promoter (3-4kb)  | 19      | 11680944  | 11686259 | -3633         | NA              | ZNF833P    |
| NR4A2_R848 | chr19   | 12870635  | 12871035 | Promoter (2-3kb)  | 19      | 12868601  | 12873640 | 2034          | ENSG00000105613 | MAST1      |
| NR4A2_R848 | chr19   | 12989359  | 12989759 | Promoter (5-6kb)  | 19      | 12995608  | 13096201 | -5821         | ENSG00000008441 | NFIX       |
| NR4A2_R848 | chr19   | 13604678  | 13605078 | Promoter (4-5kb)  | 19      | 13208046  | 13599946 | -4732         | ENSG00000141837 | CACNA1A    |
| NR4A2_R848 | chr19   | 13633696  | 13634096 | Promoter (<=1kb)  | 19      | 13371761  | 13633025 | -671          | ENSG00000141837 | CACNA1A    |
| NR4A2_R848 | chr19   | 14555009  | 14555409 | Promoter (6-7kb)  | 19      | 14561967  | 14564981 | -6558         | ENSG00000099797 | TECR       |
| NR4A2_R848 | chr19   | 15011464  | 15011864 | Promoter (<=1kb)  | 19      | 15010726  | 15023276 | 738           | ENSG00000160994 | CCDC105    |
| NR4A2_R848 | chr19   | 15608658  | 15609058 | Promoter (6-7kb)  | 19      | 15615218  | 15622312 | -6160         | ENSG00000186526 | CYP4F8     |
| NR4A2_R848 | chr19   | 15813376  | 15813776 | Promoter (5-6kb)  | 19      | 15807003  | 15808126 | -5250         | ENSG00000186723 | OR10H1     |
| NR4A2_R848 | chr19   | 15831840  | 15832240 | Promoter (1-2kb)  | 19      | 15830559  | 15835420 | 1281          | ENSG00000214049 | UCA1       |
| NR4A2_R848 | chr19   | 15887735  | 15888135 | Promoter (1-2kb)  | 19      | 15879637  | 15886501 | -1234         | ENSG00000186115 | CYP4F2     |
| NR4A2_R848 | chr19   | 16043302  | 16043702 | Promoter (9-10kb) | 19      | 16034120  | 16042111 | 9182          | ENSG00000167459 | LINC00905  |
| NR4A2_R848 | chr19   | 16427965  | 16428365 | Promoter (6-7kb)  | 19      | 16417439  | 16421433 | -6532         | ENSG00000127527 | EPS15L1    |
| NR4A2_R848 | chr19   | 16978995  | 16979395 | Promoter (2-3kb)  | 19      | 16947082  | 16976068 | -2927         | ENSG00000160111 | CPAMD8     |
| NR4A2_R848 | chr19   | 17340467  | 17340867 | Promoter (<=1kb)  | 19      | 17340946  | 17341664 | -79           | ENSG00000130299 | GTPBP3     |
| NR4A2_R848 | chr19   | 17461228  | 17461628 | Promoter (<=1kb)  | 19      | 17455425  | 17460954 | -274          | ENSG00000171773 | NXNL1      |
| NR4A2_R848 | chr19   | 17725115  | 17725515 | Promoter (1-2kb)  | 19      | 17727438  | 17734513 | -1923         | ENSG00000130479 | MAP1S      |
| NR4A2_R848 | chr19   | 17866890  | 17867290 | Promoter (4-5kb)  | 19      | 17862588  | 17862720 | 4302          | ENSG00000207166 | SNORA68    |
| NR4A2_R848 | chr19   | 17957154  | 17957554 | Promoter (4-5kb)  | 19      | 17952185  | 17954653 | 4969          | ENSG00000105642 | KCNN1      |
| NR4A2_R848 | chr19   | 17981304  | 17981704 | Promoter (7-8kb)  | 19      | 17973869  | 17998445 | 7435          | ENSG00000105642 | KCNN1      |
| NR4A2_R848 | chr19   | 18215835  | 18216235 | Promoter (4-5kb)  | 19      | 18210929  | 18221122 | 4887          | ENSG00000105650 | PDE4C      |
| NR4A2_R848 | chr19   | 18554484  | 18554884 | Promoter (2-3kb)  | 19      | 18557762  | 18569387 | -2878         | ENSG00000105700 | KXD1       |
| NR4A2_R848 | chr19   | 18619724  | 18620124 | Promoter (3-4kb)  | 19      | 18615976  | 18618454 | 3748          | ENSG00000105696 | TMEM59L    |
| NR4A2_R848 | chr19   | 18654413  | 18654813 | Promoter (9-10kb) | 19      | 18644638  | 18667992 | 9775          | ENSG00000167487 | KLHL26     |
| NR4A2_R848 | chr19   | 18879490  | 18879890 | Promoter (4-5kb)  | 19      | 18877917  | 18884233 | 4329          | ENSG00000223802 | CERS1      |
| NR4A2_R848 | chr19   | 18884522  | 18884922 | Promoter (<=1kb)  | 19      | 18877917  | 18884233 | -289          | ENSG00000223802 | CERS1      |
| NR4A2_R848 | chr19   | 19239421  | 19240207 | Promoter (1-2kb)  | 19      | 19238392  | 19249019 | 1029          | ENSG00000130287 | NCAN       |
| NR4A2_R848 | chr19   | 19534192  | 19534592 | Promoter (3-4kb)  | 19      | 19538248  | 19546659 | -3656         | ENSG00000160161 | CILP2      |
| NR4A2_R848 | chr19   | 19645367  | 19645767 | Promoter (1-2kb)  | 19      | 19629476  | 19643657 | -1710         | ENSG00000089639 | GMIP       |
| NR4A2_R848 | chr19   | 32998577  | 32998977 | Promoter (2-3kb)  | 19      | 32994022  | 32996461 | -2116         | ENSG00000131941 | RHPN2      |
| NR4A2_R848 | chr19   | 33023572  | 33023972 | Promoter (3-4kb)  | 19      | 32978593  | 33027271 | 3299          | ENSG00000131941 | RHPN2      |
| NR4A2_R848 | chr19   | 33218478  | 33218878 | Promoter (6-7kb)  | 19      | 33208776  | 33211689 | -6789         | ENSG00000130876 | SLC7A10    |
| NR4A2_R848 | chr19   | 33233147  | 33233547 | Promoter (7-8kb)  | 19      | 33208664  | 33225850 | -7297         | ENSG00000130876 | SLC7A10    |
| NR4A2_R848 | chr19   | 33505606  | 33506376 | Promoter (4-5kb)  | 19      | 33462951  | 33511138 | 4762          | ENSG00000124299 | PEPD       |
| NR4A2_R848 | chr19   | 34486517  | 34486917 | Promoter (3-4kb)  | 19      | 34482528  | 34498629 | 3989          | ENSG00000142279 | WTIP       |
| NR4A2_R848 | chr19   | 35553319  |          |                   |         |           |          |               |                 |            |



| Condition  | peakChr | peakStart | peakEnd  | annotation        | geneChr | geneStart | geneEnd  | distanceToTSS | geneID          | geneSymbol   |
|------------|---------|-----------|----------|-------------------|---------|-----------|----------|---------------|-----------------|--------------|
| NR4A2_R848 | chr19   | 40528551  | 40528951 | Promoter (1-2kb)  | 19      | 40530488  | 40560752 | -1537         | ENSG00000160460 | SPTBN4       |
| NR4A2_R848 | chr19   | 40848911  | 40849311 | Promoter (1-2kb)  | 19      | 40844922  | 40850440 | 1129          | ENSG00000255974 | CYP2A6       |
| NR4A2_R848 | chr19   | 41309334  | 41309734 | Promoter (<=1kb)  | 19      | 41310172  | 41324873 | -438          | ENSG00000142039 | CCDC97       |
| NR4A2_R848 | chr19   | 41432398  | 41432798 | Promoter (3-4kb)  | 19      | 41431749  | 41436439 | 3641          | ENSG00000105341 | DMAC2        |
| NR4A2_R848 | chr19   | 41888821  | 41889221 | Promoter (3-4kb)  | 19      | 41892634  | 41895373 | -3413         | ENSG00000076928 | ARHGFE1      |
| NR4A2_R848 | chr19   | 41912534  | 41912934 | Promoter (5-6kb)  | 19      | 41906576  | 41907452 | 5958          | ENSG00000076928 | ARHGFE1      |
| NR4A2_R848 | chr19   | 41916218  | 41916618 | Promoter (6-7kb)  | 19      | 41923094  | 41930127 | -6476         | ENSG00000076928 | LOC100505585 |
| NR4A2_R848 | chr19   | 41918799  | 41919570 | Promoter (3-4kb)  | 19      | 41923094  | 41930127 | -3524         | ENSG00000076928 | LOC100505585 |
| NR4A2_R848 | chr19   | 41991464  | 41991864 | Promoter (<=1kb)  | 19      | 41988508  | 41990951 | -513          | ENSG00000105409 | ATP1A3       |
| NR4A2_R848 | chr19   | 42039135  | 42039535 | Promoter (3-4kb)  | 19      | 41998321  | 42042901 | 3366          | ENSG00000105737 | GRIK5        |
| NR4A2_R848 | chr19   | 42066456  | 42066856 | Promoter (<=1kb)  | 19      | 42021331  | 42065805 | -651          | ENSG00000105737 | GRIK5        |
| NR4A2_R848 | chr19   | 42311063  | 42311463 | Promoter (1-2kb)  | 19      | 42313309  | 42325064 | -1846         | ENSG00000167619 | TMEM145      |
| NR4A2_R848 | chr19   | 42334702  | 42335102 | Promoter (9-10kb) | 19      | 42325635  | 42378765 | 9067          | ENSG00000105429 | MEGF8        |
| NR4A2_R848 | chr19   | 44409385  | 44409785 | Promoter (7-8kb)  | 19      | 44329695  | 44401608 | -7777         | ENSG00000062370 | ZNF112       |
| NR4A2_R848 | chr19   | 44410281  | 44410681 | Promoter (8-9kb)  | 19      | 44329695  | 44401608 | -8673         | ENSG00000062370 | ZNF112       |
| NR4A2_R848 | chr19   | 45265076  | 45265476 | Promoter (<=1kb)  | 19      | 45264687  | 45288552 | 389           | ENSG0000007047  | MARK4        |
| NR4A2_R848 | chr19   | 45374825  | 45375225 | Promoter (3-4kb)  | 19      | 45352209  | 45370918 | -3907         | ENSG00000104884 | ERCC2        |
| NR4A2_R848 | chr19   | 45621035  | 45621435 | Promoter (1-2kb)  | 19      | 45616485  | 45619494 | -1541         | ENSG00000125746 | EML2         |
| NR4A2_R848 | chr19   | 46669762  | 46670162 | Promoter (8-9kb)  | 19      | 46661478  | 46671341 | 8284          | ENSG00000245598 | DACT3-AS1    |
| NR4A2_R848 | chr19   | 47037096  | 47037496 | Promoter (1-2kb)  | 19      | 47035889  | 47040733 | 1207          | ENSG00000130751 | NPAS1        |
| NR4A2_R848 | chr19   | 47418575  | 47418975 | Promoter (<=1kb)  | 19      | 47403124  | 47418801 | 0             | ENSG00000105419 | MEIS3        |
| NR4A2_R848 | chr19   | 47422243  | 47422643 | Promoter (2-3kb)  | 19      | 47403124  | 47419527 | -2716         | ENSG00000105419 | MEIS3        |
| NR4A2_R848 | chr19   | 47471759  | 47472159 | Promoter (<=1kb)  | 19      | 47428017  | 47471893 | 0             | ENSG00000118160 | SLC8A2       |
| NR4A2_R848 | chr19   | 47490190  | 47490590 | Promoter (<=1kb)  | 19      | 47487662  | 47491475 | 885           | ENSG00000105402 | NAPA         |
| NR4A2_R848 | chr19   | 47776110  | 47776510 | Promoter (2-3kb)  | 19      | 47778585  | 47784684 | -2075         | ENSG00000178980 | SELENOW      |
| NR4A2_R848 | chr19   | 48023333  | 48023834 | Promoter (3-4kb)  | 19      | 48019805  | 48025148 | 3528          | ENSG00000169393 | ELSPBP1      |
| NR4A2_R848 | chr19   | 48056581  | 48056981 | Promoter (1-2kb)  | 19      | 48047846  | 48055059 | -1522         | ENSG00000105499 | PLA2G4C      |
| NR4A2_R848 | chr19   | 48373681  | 48374081 | Promoter (<=1kb)  | 19      | 48373108  | 48376271 | 573           | ENSG00000105467 | SYNGR4       |
| NR4A2_R848 | chr19   | 48543613  | 48544013 | Promoter (8-9kb)  | 19      | 48552075  | 48599425 | -8062         | ENSG00000088002 | SULT2B1      |
| NR4A2_R848 | chr19   | 48821717  | 48822257 | Promoter (6-7kb)  | 19      | 48813018  | 48815072 | -6645         | ENSG00000087076 | HSD17B14     |
| NR4A2_R848 | chr19   | 48903798  | 48904198 | Promoter (2-3kb)  | 19      | 48900798  | 48919259 | 3000          | ENSG00000104805 | NUCB1        |
| NR4A2_R848 | chr19   | 49021283  | 49021683 | Promoter (<=1kb)  | 19      | 49017496  | 49020523 | -760          | ENSG00000268655 | LOC101059948 |
| NR4A2_R848 | chr19   | 49066422  | 49066822 | Promoter (1-2kb)  | 19      | 49055793  | 49065076 | -1346         | ENSG00000225950 | NTF4         |
| NR4A2_R848 | chr19   | 49160516  | 49160916 | Promoter (2-3kb)  | 19      | 49157832  | 49211749 | 2684          | ENSG00000130529 | TRPM4        |
| NR4A2_R848 | chr19   | 49181874  | 49182274 | Promoter (<=1kb)  | 19      | 49182526  | 49211836 | -252          | ENSG00000130529 | TRPM4        |
| NR4A2_R848 | chr19   | 49448977  | 49449377 | Promoter (<=1kb)  | 19      | 49446299  | 49449520 | 143           | ENSG00000104872 | PIH1D1       |
| NR4A2_R848 | chr19   | 49474728  | 49475128 | Promoter (<=1kb)  | 19      | 49474602  | 49482391 | 126           | ENSG00000090554 | FLT3LG       |
| NR4A2_R848 | chr19   | 50169730  | 50170130 | Promoter (6-7kb)  | 19      | 50152548  | 50163195 | -6535         | ENSG00000161652 | IZUMO2       |
| NR4A2_R848 | chr19   | 50262189  | 50262589 | Promoter (5-6kb)  | 19      | 50268346  | 50310539 | -5757         | ENSG00000105357 | MYH14        |
| NR4A2_R848 | chr19   | 50439175  | 50439575 | Promoter (6-7kb)  | 19      | 50432892  | 50466321 | 6283          | ENSG00000086967 | MYBPC2       |
| NR4A2_R848 | chr19   | 50498534  | 50498934 | Promoter (9-10kb) | 19      | 50506446  | 50508029 | 9063          | ENSG00000161677 | JOSD2        |
| NR4A2_R848 | chr19   | 50499486  | 50499886 | Promoter (8-9kb)  | 19      | 50506446  | 50508029 | 8143          | ENSG00000161677 | JOSD2        |
| NR4A2_R848 | chr19   | 50507005  | 50507405 | Promoter (<=1kb)  | 19      | 50506446  | 50508029 | 624           | ENSG00000161677 | JOSD2        |
| NR4A2_R848 | chr19   | 50576418  | 50576818 | Promoter (7-8kb)  | 19      | 50516892  | 50568435 | -7983         | ENSG00000131409 | LRRRC4B      |
| NR4A2_R848 | chr19   | 50648798  | 50649198 | Promoter (<=1kb)  | 19      | 50649445  | 50659306 | -247          | ENSG00000235034 | C19orf81     |
| NR4A2_R848 | chr19   | 50650462  | 50650862 | Promoter (<=1kb)  | 19      | 50649788  | 50659095 | 674           | ENSG00000235034 | C19orf81     |
| NR4A2_R848 | chr19   | 50667069  | 50667469 | Promoter (<=1kb)  | 19      | 50662630  | 50666733 | -336          | ENSG00000161681 | SHANK1       |
| NR4A2_R848 | chr19   | 50810047  | 50810447 | Promoter (1-2kb)  | 19      | 50808874  | 50818880 | 1173          | ENSG00000180279 | LINC01869    |
| NR4A2_R848 | chr19   | 50875939  | 50876339 | Promoter (<=1kb)  | 19      | 50876031  | 50879215 | 0             | ENSG00000167751 | KLK2         |
| NR4A2_R848 | chr19   | 50913403  | 50913803 | Promoter (2-3kb)  | 19      | 50906934  | 50910738 | -2665         | ENSG00000167749 | KLK4         |
| NR4A2_R848 | chr19   | 50969842  | 50970242 | Promoter (<=1kb)  | 19      | 50958632  | 50969673 | -169          | ENSG00000167755 | KLK6         |
| NR4A2_R848 | chr19   | 50980722  | 50981365 | Promoter (2-3kb)  | 19      | 50976488  | 50983815 | 2450          | ENSG00000169035 | KLK7         |
| NR4A2_R848 | chr19   | 51083232  | 51083632 | Promoter (<=1kb)  | 19      | 51077969  | 51082886 | -346          | ENSG00000129437 | KLK14        |
| NR4A2_R848 | chr19   | 51213889  | 51214289 | Promoter (6-7kb)  | 19      | 51206929  | 51207009 | -6880         | ENSG00000278617 | MIR8074      |
| NR4A2_R848 | chr19   | 53272818  | 53273218 | Promoter (5-6kb)  | 19      | 53266676  | 53267723 | -5095         | ENSG00000228567 | VN1R4        |
| NR4A2_R848 | chr19   | 53462300  | 53462700 | Promoter (5-6kb)  | 19      | 53467733  | 53496255 | -5033         | ENSG00000198346 | ZNF813       |
| NR4A2_R848 | chr19   | 53725704  | 53726104 | Promoter (<=1kb)  | 19      | 53725442  | 53725526 | 262           | ENSG00000207925 | MIR516B2     |
| NR4A2_R848 | chr19   | 53990198  | 53990598 | Promoter (1-2kb)  | 19      | 53992288  | 54012664 | -1690         | ENSG00000130433 | CACNG6       |
| NR4A2_R848 | chr19   | 55096560  | 55096960 | Promoter (<=1kb)  | 19      | 55096077  | 55097064 | 104           | ENSG00000125503 | PPP1R12C     |
| NR4A2_R848 | chr19   | 55199583  | 55199983 | Promoter (7-8kb)  | 19      | 55205392  | 55207239 | 7256          | ENSG00000080031 | PTPRH        |
| NR4A2_R848 | chr19   | 55266287  | 55266687 | Promoter (7-8kb)  | 19      | 55229779  | 55259017 | -7270         | ENSG00000105063 | PPP6R1       |
| NR4A2_R848 | chr19   | 55434369  | 55434769 | Promoter (7-8kb)  | 19      | 55431976  | 55442337 | 7568          | ENSG00000187902 | SHISA7       |
| NR4A2_R848 | chr19   | 55448184  | 55448875 | Promoter (5-6kb)  | 19      | 55428740  | 55442863 | -5321         | ENSG00000187902 | SHISA7       |
| NR4A2_R848 | chr19   | 55685078  | 55685478 | Promoter (4-5kb)  | 19      | 55680676  | 55689915 | 4402          | ENSG00000063245 | EPN1         |
| NR4A2_R848 | chr19   | 55691588  | 55691988 | Promoter (<=1kb)  | 19      | 55692648  | 55693387 | -660          | ENSG00000063245 | EPN1         |
| NR4A2_R848 | chr19   | 56123619  | 56124019 | Promoter (2-3kb)  | 19      | 56087366  | 56121295 | -2324         | ENSG00000142409 | ZNF787       |
| NR4A2_R848 | chr19   | 56158829  | 56159400 | Promoter (1-2kb)  | 19      | 56157309  | 56159967 | 1520          | ENSG00000167685 | ZNF444       |
| NR4A2_R848 | chr19   | 56174261  | 56174661 | Promoter (1-2kb)  | 19      | 56176008  | 56185775 | -1347         | ENSG00000197487 | GALP         |
| NR4A2_R848 | chr19   | 56304235  | 56304635 | Promoter (2-3kb)  | 19      | 56301990  | 56310450 | 2245          | ENSG00000267710 | EDDM13       |
| NR4A2_R848 | chr19   | 57137807  | 57138207 | Promoter (6-7kb)  | 19      | 57134096  | 57145202 | 6995          | ENSG00000141946 | ZIM3         |
| NR4A2_R848 | chr19   | 58092647  | 58093047 | Promoter (2-3kb)  | 19      | 58083843  | 58090598 | -2049         | ENSG00000121413 | ZSCAN18      |
| NR4A2_R848 | chr19   | 58270069  | 58270469 | Promoter (8-9kb)  | 19      | 58278955  | 58302791 | -8486         | ENSG00000278129 | ZNF8         |
| NR4A2_R848 | chr20   | 3246910   | 3247310  | Promoter (7-8kb)  | 20      | 3237544   | 3239559  | -7351         | ENSG00000088836 | SLC4A11      |
| NR4A2_R848 | chr20   | 4717344   | 4717744  | Promoter (4-5kb)  | 20      | 4721909   | 4728460  | -4165         | ENSG00000171864 | PRND         |
| NR4A2_R848 | chr20   | 5525405   | 5525805  | Promoter (<=1kb)  | 20      | 5482736   | 5526606  | 801           | ENSG00000205181 | LINC00654    |
| NR4A2_R848 | chr20   | 18380927  | 18381327 | Promoter (1-2kb)  | 20      | 18379049  | 18381484 | 1878          | ENSG00000237282 | LINC00851    |
| NR4A2_R848 | chr20   | 23453909  | 23454493 | Promoter (1-2kb)  | 20      | 23450412  | 23452876 | -1033         | ENSG00000125831 | CST11        |
| NR4A2_R848 | chr20   | 24581909  | 24582309 | Promoter (2-3kb)  | 20      | 24584902  | 24597153 | -2593         | ENSG00000101463 | SYNDIG1      |
| NR4A2_R848 | chr20   | 24957029  | 24957429 | Promoter (7-8kb)  | 20      | 24949269  | 24959928 | 7760          | ENSG00000077984 | EST7         |
| NR4A2_R848 | chr20   | 25217828  | 25218228 | Promoter (2-3kb)  | 20      | 25215698  | 25224702 | 2130          | ENSG00000197586 | ENTPD6       |
| NR4A2_R848 | chr20   | 25867582  | 25867982 | Promoter (<=1kb)  | 20      | 25774222  | 25868132 | 150           | NA              | LOC101926935 |
| NR4A2_R848 | chr20   | 29411233  | 29411633 | Promoter (5-6kb)  | 20      | 29415264  | 29416911 | 5278          | NA              | FRG2EP       |
| NR4A2_R848 | chr20   | 29497571  | 29497971 | Promoter (<=1kb)  | 20      | 29480147  | 29497179 | -392          | NA              | FRG1EP       |
| NR4A2_R848 | chr20   | 30283762  | 30284162 | Promoter (5-6kb)  | 20      | 30278906  | 30289205 | 5043          | NA              | LINC01597    |
| NR4A2_R848 | chr20   | 30412694  | 30413292 | Promoter (9-10kb) | 20      | 30403123  | 30403384 | -9310         | NA              | MLLT10P1     |
| NR4A2_R848 | chr20   | 31954828  | 31955228 | Promoter (2-3kb)  | 20      | 31944337  | 31952046 | -2782         | ENSG00000088356 | PDRG1        |
| NR4A2_R848 | chr20   | 32678320  | 32678720 | Promoter (4-5kb)  | 20      | 32631625  | 32673941 | -4379         | ENSG00000198547 | C20orf203    |
| NR4A2_R848 | chr20   | 33074486  | 33074939 | Promoter (4-5kb)  | 20      | 33079644  | 33092505 | -4705         | ENSG00000186191 | BPIFB4       |
| NR4A2_R848 | chr20   | 33231043  | 33231443 | Promoter (4-5kb)  | 20      | 33235995  | 33243309 | -4552         | ENSG00000198183 | BPIFA1       |
| NR4A2_R848 | chr20   | 33305388  | 33305788 | Promoter (6-7kb)  | 20      | 33298713  | 33307966 | 6675          | ENSG00000125999 | BPIFB1       |
| NR4A2_R848 | chr20   | 33308675  | 33309075 | Promoter (9-10kb) | 20      | 33298713  | 33307966 | 9962          | ENSG00000125999 | BPIFB1       |
| NR4A2_R848 | chr20   | 36296507  | 36296907 | Promoter (9-10kb) | 20      | 36306336  | 36528637 | -9429         | ENSG00000080845 | DLGAP4       |
| NR4A2_R848 | chr20   | 36314700  | 36315100 | Promoter (8-9kb)  | 20      | 36306381  |          |               |                 |              |

| Condition  | peakChr | peakStart | peakEnd  | annotation        | geneChr | geneStart | geneEnd  | distanceToTSS | geneID          | geneSymbol   |
|------------|---------|-----------|----------|-------------------|---------|-----------|----------|---------------|-----------------|--------------|
| NR4A2_R848 | chr20   | 58519955  | 58520355 | Promoter (2-3kb)  | 20      | 58523160  | 58573824 | -2805         | ENSG00000231290 | APCDD1L-DT   |
| NR4A2_R848 | chr20   | 58635881  | 58636358 | Promoter (1-2kb)  | 20      | 58634772  | 58635738 | 1109          | ENSG00000268941 | LINC01711    |
| NR4A2_R848 | chr20   | 58643136  | 58643536 | Promoter (7-8kb)  | 20      | 58651253  | 58679524 | -7717         | ENSG00000124222 | STX16        |
| NR4A2_R848 | chr20   | 58694927  | 58695327 | Promoter (<=1kb)  | 20      | 58694421  | 58713580 | 506           | ENSG00000254995 | STX16-NPEPL1 |
| NR4A2_R848 | chr20   | 58817419  | 58817819 | Promoter (<=1kb)  | 20      | 58817132  | 58817725 | 0             | ENSG00000284040 | MIR296       |
| NR4A2_R848 | chr20   | 58830215  | 58830681 | Promoter (9-10kb) | 20      | 58839718  | 58911192 | -9037         | ENSG00000087460 | GNAS         |
| NR4A2_R848 | chr20   | 59604764  | 59605164 | Promoter (<=1kb)  | 20      | 59604540  | 59847711 | 224           | ENSG00000087495 | PHACTR3      |
| NR4A2_R848 | chr20   | 59686582  | 59686982 | Promoter (9-10kb) | 20      | 59676661  | 59847711 | 9921          | ENSG00000087495 | PHACTR3      |
| NR4A2_R848 | chr20   | 60314527  | 60314927 | Promoter (6-7kb)  | 20      | 60308474  | 60308567 | 6053          | ENSG00000207802 | MIR646       |
| NR4A2_R848 | chr20   | 61605151  | 61605551 | Promoter (5-6kb)  | 20      | 61599761  | 61937249 | 5390          | ENSG00000179242 | CDH4         |
| NR4A2_R848 | chr20   | 62201951  | 62202351 | Promoter (3-4kb)  | 20      | 62198678  | 62200266 | 3273          | ENSG00000101181 | MTG2         |
| NR4A2_R848 | chr20   | 62270773  | 62271173 | Promoter (2-3kb)  | 20      | 62273309  | 62282093 | -2136         | ENSG00000130703 | OSBPL2       |
| NR4A2_R848 | chr20   | 62351408  | 62351808 | Promoter (<=1kb)  | 20      | 62346558  | 62351989 | 181           | ENSG00000130702 | LAMA5        |
| NR4A2_R848 | chr20   | 62397910  | 62398479 | Promoter (1-2kb)  | 20      | 62391014  | 62396331 | -1579         | ENSG00000149679 | CABLES2      |
| NR4A2_R848 | chr20   | 62421023  | 62421453 | Promoter (6-7kb)  | 20      | 62410237  | 62427539 | 6086          | ENSG00000130701 | RBBP8NL      |
| NR4A2_R848 | chr20   | 62776893  | 62777293 | Promoter (<=1kb)  | 20      | 62774121  | 62776932 | 0             | ENSG00000228705 | LINC00659    |
| NR4A2_R848 | chr20   | 62971386  | 62971786 | Promoter (6-7kb)  | 20      | 62965006  | 62968597 | 6380          | ENSG00000101194 | SLC17A9      |
| NR4A2_R848 | chr20   | 63017658  | 63018058 | Promoter (8-9kb)  | 20      | 63009383  | 63085071 | 8275          | ENSG00000272259 | LINC01749    |
| NR4A2_R848 | chr20   | 63171916  | 63172647 | Promoter (5-6kb)  | 20      | 63178500  | 63178586 | -5853         | ENSG00000207598 | MIR124-3     |
| NR4A2_R848 | chr20   | 63257559  | 63257959 | Promoter (3-4kb)  | 20      | 63240784  | 63254463 | -3096         | ENSG00000101198 | NKAIN4       |
| NR4A2_R848 | chr20   | 63348314  | 63348714 | Promoter (5-6kb)  | 20      | 63350977  | 63354566 | 5852          | ENSG00000101204 | CHRNA4       |
| NR4A2_R848 | chr20   | 63491572  | 63491972 | Promoter (6-7kb)  | 20      | 63490081  | 63498748 | 6776          | ENSG00000101210 | EEF1A2       |
| NR4A2_R848 | chr20   | 63492262  | 63492687 | Promoter (6-7kb)  | 20      | 63490081  | 63498748 | 6061          | ENSG00000101210 | EEF1A2       |
| NR4A2_R848 | chr20   | 63502968  | 63503368 | Promoter (3-4kb)  | 20      | 63497454  | 63499185 | -3783         | ENSG00000101210 | EEF1A2       |
| NR4A2_R848 | chr20   | 63960071  | 63960471 | Promoter (3-4kb)  | 20      | 63939829  | 63956416 | -3655         | ENSG00000198276 | UCKL1        |
| NR4A2_R848 | chr20   | 64032088  | 64032488 | Promoter (1-2kb)  | 20      | 64034344  | 64039001 | -1856         | ENSG00000196421 | C2orf204     |
| NR4A2_R848 | chr21   | 8219725   | 8220220  | Promoter (7-8kb)  | 21      | 8212572   | 8212724  | 7153          | ENSG00000276700 | RNA5-8SN4    |
| NR4A2_R848 | chr21   | 8992173   | 8992662  | Promoter (5-6kb)  | 21      | 8986999   | 8987178  | 5174          | ENSG00000275708 | MIR3648-1    |
| NR4A2_R848 | chr21   | 9823345   | 9823745  | Promoter (6-7kb)  | 21      | 9781910   | 9816833  | -6512         | ENSG00000280081 | LINC01667    |
| NR4A2_R848 | chr21   | 13987412  | 13987812 | Promoter (6-7kb)  | 21      | 13943769  | 13980437 | -6975         | ENSG00000215559 | ANKRD20A11P  |
| NR4A2_R848 | chr21   | 31919394  | 31919794 | Promoter (4-5kb)  | 21      | 31924552  | 31968334 | -4758         | ENSG00000142149 | HUNK         |
| NR4A2_R848 | chr21   | 32586251  | 32586651 | Promoter (<=1kb)  | 21      | 32576659  | 32585533 | -718          | ENSG00000242220 | TCP10L       |
| NR4A2_R848 | chr21   | 35992993  | 35993393 | Promoter (8-9kb)  | 21      | 35954660  | 35984749 | -8244         | NA              | LOC101928269 |
| NR4A2_R848 | chr21   | 35993567  | 35993967 | Promoter (8-9kb)  | 21      | 35954660  | 35984749 | -8818         | NA              | LOC101928269 |
| NR4A2_R848 | chr21   | 38913661  | 38914061 | Promoter (<=1kb)  | 21      | 38863676  | 38912921 | -740          | NA              | LOC400867    |
| NR4A2_R848 | chr21   | 39563257  | 39563657 | Promoter (6-7kb)  | 21      | 39556442  | 39673137 | 6815          | ENSG00000183778 | B3GALT5      |
| NR4A2_R848 | chr21   | 41150189  | 41150589 | Promoter (1-2kb)  | 21      | 41141493  | 41148198 | -1991         | ENSG00000226496 | LINC00323    |
| NR4A2_R848 | chr21   | 41150687  | 41151087 | Promoter (2-3kb)  | 21      | 41141493  | 41148198 | -2489         | ENSG00000226496 | LINC00323    |
| NR4A2_R848 | chr21   | 41179128  | 41179686 | Promoter (1-2kb)  | 21      | 41175231  | 41180818 | 1132          | ENSG00000280109 | PLAC4        |
| NR4A2_R848 | chr21   | 41749497  | 41749897 | Promoter (2-3kb)  | 21      | 41746772  | 41746841 | -2656         | ENSG00000275166 | MIR6814      |
| NR4A2_R848 | chr21   | 41805921  | 41806823 | Promoter (1-2kb)  | 21      | 41801657  | 41804723 | -1198         | ENSG00000141956 | PRDM15       |
| NR4A2_R848 | chr21   | 41829072  | 41829545 | Promoter (5-6kb)  | 21      | 41821191  | 41835518 | 5973          | ENSG00000141956 | PRDM15       |
| NR4A2_R848 | chr21   | 42026969  | 42027369 | Promoter (4-5kb)  | 21      | 42022267  | 42024924 | 4702          | ENSG00000237232 | ZNF295-AS1   |
| NR4A2_R848 | chr21   | 42293273  | 42293897 | Promoter (7-8kb)  | 21      | 42285934  | 42295352 | 7339          | ENSG00000160179 | ABCG1        |
| NR4A2_R848 | chr21   | 42615326  | 42615726 | Promoter (<=1kb)  | 21      | 42599280  | 42615058 | -268          | ENSG00000225431 | LINC01671    |
| NR4A2_R848 | chr21   | 42662781  | 42663181 | Promoter (8-9kb)  | 21      | 42653813  | 42775509 | 8968          | ENSG00000160191 | PDE9A        |
| NR4A2_R848 | chr21   | 42691272  | 42691676 | Promoter (5-6kb)  | 21      | 42686197  | 42762139 | 5075          | ENSG00000160191 | PDE9A        |
| NR4A2_R848 | chr21   | 42759359  | 42759807 | Promoter (2-3kb)  | 21      | 42762214  | 42768412 | -2407         | ENSG00000160191 | PDE9A        |
| NR4A2_R848 | chr21   | 42769197  | 42769597 | Promoter (6-7kb)  | 21      | 42762214  | 42768412 | 6983          | ENSG00000160191 | PDE9A        |
| NR4A2_R848 | chr21   | 43337035  | 43337549 | Promoter (4-5kb)  | 21      | 43322417  | 43332039 | -4996         | NA              | LINC00322    |
| NR4A2_R848 | chr21   | 43467655  | 43468055 | Promoter (2-3kb)  | 21      | 43462094  | 43464973 | -2682         | ENSG00000185186 | LINC00313    |
| NR4A2_R848 | chr21   | 43604225  | 43604625 | Promoter (5-6kb)  | 21      | 43609887  | 43609989 | 5364          | ENSG00000278433 | MIR6070      |
| NR4A2_R848 | chr21   | 44318002  | 44318402 | Promoter (1-2kb)  | 21      | 44319623  | 44327376 | -1221         | ENSG00000141959 | PFKL         |
| NR4A2_R848 | chr21   | 44416542  | 44416942 | Promoter (<=1kb)  | 21      | 44414595  | 44416740 | 0             | NA              | TRPM2-AS     |
| NR4A2_R848 | chr21   | 44419462  | 44419909 | Promoter (2-3kb)  | 21      | 44414595  | 44416740 | -2722         | NA              | TRPM2-AS     |
| NR4A2_R848 | chr21   | 44460491  | 44460891 | Promoter (4-5kb)  | 21      | 44455510  | 44462196 | 4981          | ENSG00000160233 | LRR3         |
| NR4A2_R848 | chr21   | 44465477  | 44465877 | Promoter (9-10kb) | 21      | 44455510  | 44462196 | 9967          | ENSG00000160233 | LRR3         |
| NR4A2_R848 | chr21   | 44574242  | 44574642 | Promoter (<=1kb)  | 21      | 44508507  | 44573816 | -426          | ENSG00000175894 | TSPEAR       |
| NR4A2_R848 | chr21   | 44866480  | 44866880 | Promoter (<=1kb)  | 21      | 44855228  | 44865896 | -584          | ENSG00000183255 | PTTG1IP      |
| NR4A2_R848 | chr21   | 44904587  | 44904987 | Promoter (5-6kb)  | 21      | 44899067  | 44910630 | 5643          | ENSG00000160255 | ITGB2        |
| NR4A2_R848 | chr21   | 45507750  | 45508150 | Promoter (1-2kb)  | 21      | 45506019  | 45512567 | 1731          | ENSG00000182871 | COL18A1      |
| NR4A2_R848 | chr21   | 45508206  | 45508606 | Promoter (2-3kb)  | 21      | 45506019  | 45512567 | 2187          | ENSG00000182871 | COL18A1      |
| NR4A2_R848 | chr21   | 45591825  | 45592225 | Promoter (1-2kb)  | 21      | 45593654  | 45603056 | -1429         | ENSG00000233922 | LINC01694    |
| NR4A2_R848 | chr21   | 45636194  | 45636662 | Promoter (7-8kb)  | 21      | 45643694  | 45788739 | -7032         | ENSG00000183570 | PCBP3        |
| NR4A2_R848 | chr21   | 45740651  | 45741051 | Promoter (5-6kb)  | 21      | 45735392  | 45749899 | 5259          | ENSG00000183570 | PCBP3        |
| NR4A2_R848 | chr21   | 45898475  | 45898908 | Promoter (2-3kb)  | 21      | 45901015  | 45940199 | -2107         | ENSG00000183570 | PCBP3        |
| NR4A2_R848 | chr21   | 45978232  | 45978632 | Promoter (3-4kb)  | 21      | 45981737  | 46005050 | -3105         | ENSG00000142156 | COL6A1       |
| NR4A2_R848 | chr21   | 45984622  | 45985049 | Promoter (2-3kb)  | 21      | 45987109  | 45987633 | -2060         | ENSG00000142156 | COL6A1       |
| NR4A2_R848 | chr21   | 46090872  | 46091272 | Promoter (6-7kb)  | 21      | 46098097  | 46132849 | -6825         | ENSG00000142173 | COL6A2       |
| NR4A2_R848 | chr21   | 46123519  | 46124044 | Promoter (2-3kb)  | 21      | 46120560  | 46125894 | 2959          | ENSG00000142173 | COL6A2       |
| NR4A2_R848 | chr21   | 46311676  | 46312182 | Promoter (<=1kb)  | 21      | 46301710  | 46311631 | -45           | ENSG00000160298 | C21orf58     |
| NR4A2_R848 | chr21   | 46598120  | 46598520 | Promoter (4-5kb)  | 21      | 46599281  | 46602893 | 4373          | ENSG00000160307 | S100B        |
| NR4A2_R848 | chr22   | 17009532  | 17009932 | Promoter (1-2kb)  | 22      | 16961936  | 17008222 | -1310         | ENSG00000215568 | GAB4         |
| NR4A2_R848 | chr22   | 17164028  | 17164428 | Promoter (<=1kb)  | 22      | 17137511  | 17165287 | 859           | ENSG00000069998 | HDHD5        |
| NR4A2_R848 | chr22   | 17916093  | 17916493 | Promoter (9-10kb) | 22      | 17864615  | 17906874 | -9219         | ENSG00000243156 | MICAL3       |
| NR4A2_R848 | chr22   | 19727423  | 19727823 | Promoter (4-5kb)  | 22      | 19722945  | 19724771 | 4478          | ENSG00000284874 | SEPT5-GP1BB  |
| NR4A2_R848 | chr22   | 19873851  | 19874251 | Promoter (6-7kb)  | 22      | 19875692  | 19881154 | 6903          | ENSG00000184470 | TXNRD2       |
| NR4A2_R848 | chr22   | 19909747  | 19910147 | Promoter (5-6kb)  | 22      | 19895016  | 19915789 | 5642          | ENSG00000184470 | TXNRD2       |
| NR4A2_R848 | chr22   | 19921205  | 19921605 | Promoter (2-3kb)  | 22      | 19910935  | 19918221 | -2984         | ENSG00000184470 | TXNRD2       |
| NR4A2_R848 | chr22   | 19994955  | 19995418 | Promoter (4-5kb)  | 22      | 19971228  | 19990794 | -4161         | ENSG00000099889 | ARVCF        |
| NR4A2_R848 | chr22   | 20123253  | 20123653 | Promoter (<=1kb)  | 22      | 20124139  | 20127181 | -486          | ENSG00000099901 | RANBP1       |
| NR4A2_R848 | chr22   | 20199444  | 20199844 | Promoter (5-6kb)  | 22      | 20198729  | 20204918 | 5074          | ENSG00000249923 | LINC02891    |
| NR4A2_R848 | chr22   | 20251805  | 20252220 | Promoter (2-3kb)  | 22      | 20249134  | 20249211 | -2594         | ENSG00000221039 | MIR1286      |
| NR4A2_R848 | chr22   | 20443785  | 20444185 | Promoter (2-3kb)  | 22      | 20429241  | 20446620 | 2435          | ENSG00000244486 | SCARF2       |
| NR4A2_R848 | chr22   | 20582434  | 20582834 | Promoter (<=1kb)  | 22      | 20582930  | 20583749 | -96           | ENSG00000099917 | MED15        |
| NR4A2_R848 | chr22   | 22291543  | 22292230 | Promoter (5-6kb)  | 22      | 22298124  | 22329122 | -5894         | NA              | BMS1P20      |
| NR4A2_R848 | chr22   | 22298372  | 22298772 | Promoter (<=1kb)  | 22      | 22298124  | 22329122 | 248           | NA              | BMS1P20      |
| NR4A2_R848 | chr22   | 22652424  | 22652824 | Promoter (5-6kb)  | 22      | 22646778  | 22647878 | 5646          | ENSG00000100121 | GGTLC2       |
| NR4A2_R848 | chr22   | 23274816  | 23275216 | Promoter (7-8kb)  | 22      | 23283209  | 23291131 | -7993         | ENSG00000186716 | BCR          |
| NR4A2_R848 | chr22   | 23533752  | 23534152 | Promoter (2-3kb)  | 22      | 23536881  | 23539480 | -2729         | NA              | PCAT14       |
| NR4A2_R848 | chr22   | 23761709  | 23762109 | Promoter (<=1kb)  | 22      | 23763021  | 23764363 | -912          | ENSG00000169314 | C22orf15     |
| NR4A2_R848 | chr22   | 24621896  | 24622296 | Promoter (1-2kb)  | 22      | 24620408  | 24628976 | 1488          | ENSG00000100031 | GGT1         |
| NR4A2_R848 | chr22   | 24633530  | 24633930 | Promoter (<=1kb)  | 22      | 24632954  | 24650012 |               |                 |              |



| Condition    | peakChr | peakStart | peakEnd   | annotation        | geneChr | geneStart | geneEnd   | distanceToTSS | geneID          | geneSymbol   |
|--------------|---------|-----------|-----------|-------------------|---------|-----------|-----------|---------------|-----------------|--------------|
| NR4A2_R848   | chr22   | 37351126  | 37351526  | Promoter (3-4kb)  | 22      | 37352190  | 37354839  | 3313          | ENSG00000237862 | LOC100506271 |
| NR4A2_R848   | chr22   | 37682380  | 37682780  | Promoter (<=1kb)  | 22      | 37681673  | 37693475  | 707           | ENSG00000273899 | NOL12        |
| NR4A2_R848   | chr22   | 37821345  | 37821745  | Promoter (1-2kb)  | 22      | 37823382  | 37825485  | -1637         | ENSG00000128310 | GALR3        |
| NR4A2_R848   | chr22   | 37975494  | 37975894  | Promoter (2-3kb)  | 22      | 37970686  | 37978031  | 2137          | ENSG00000100146 | SOX10        |
| NR4A2_R848   | chr22   | 38447805  | 38448205  | Promoter (6-7kb)  | 22      | 38426327  | 38455199  | 6994          | ENSG00000168135 | KCNJ4        |
| NR4A2_R848   | chr22   | 38738711  | 38739111  | Promoter (<=1kb)  | 22      | 38738238  | 38739247  | 136           | ENSG00000100242 | SUN2         |
| NR4A2_R848   | chr22   | 38761791  | 38762191  | Promoter (5-6kb)  | 22      | 38745687  | 38756000  | -5791         | ENSG00000100242 | SUN2         |
| NR4A2_R848   | chr22   | 39127782  | 39128182  | Promoter (6-7kb)  | 22      | 39133691  | 39134779  | 6597          | ENSG00000100307 | CBX7         |
| NR4A2_R848   | chr22   | 39430073  | 39430473  | Promoter (1-2kb)  | 22      | 39432431  | 39437060  | -1958         | NA              | LOC100506472 |
| NR4A2_R848   | chr22   | 39563921  | 39564321  | Promoter (6-7kb)  | 22      | 39570753  | 39684528  | -6432         | ENSG00000100346 | CACNA1I      |
| NR4A2_R848   | chr22   | 39565841  | 39566335  | Promoter (4-5kb)  | 22      | 39570753  | 39684528  | -4418         | ENSG00000100346 | CACNA1I      |
| NR4A2_R848   | chr22   | 41721084  | 41721484  | Promoter (9-10kb) | 22      | 41731056  | 41799414  | -9572         | ENSG00000167077 | MEI1         |
| NR4A2_R848   | chr22   | 42598281  | 42598681  | Promoter (4-5kb)  | 22      | 42585887  | 42603012  | 4331          | ENSG00000100227 | POLDIP3      |
| NR4A2_R848   | chr22   | 43029558  | 43029958  | Promoter (8-9kb)  | 22      | 43038585  | 43052366  | -8627         | ENSG00000230319 | TTL1-AS1     |
| NR4A2_R848   | chr22   | 43205649  | 43206049  | Promoter (6-7kb)  | 22      | 43212674  | 43213661  | -6625         | ENSG00000236272 | SCUBE1-AS2   |
| NR4A2_R848   | chr22   | 43509174  | 43509758  | Promoter (6-7kb)  | 22      | 43516107  | 43537117  | -6349         | NA              | EFCAB6-AS1   |
| NR4A2_R848   | chr22   | 43835287  | 43835687  | Promoter (3-4kb)  | 22      | 43828806  | 43838913  | 3226          | ENSG00000130540 | SULT4A1      |
| NR4A2_R848   | chr22   | 44146000  | 44146400  | Promoter (9-10kb) | 22      | 44136464  | 44139124  | 9536          | ENSG00000188677 | PARVB        |
| NR4A2_R848   | chr22   | 44154552  | 44155149  | Promoter (7-8kb)  | 22      | 44162734  | 44168243  | -7585         | ENSG00000188677 | PARVB        |
| NR4A2_R848   | chr22   | 44575648  | 44576206  | Promoter (4-5kb)  | 22      | 44571043  | 44572453  | 4605          | ENSG00000187012 | LINC00207    |
| NR4A2_R848   | chr22   | 44617315  | 44618177  | Promoter (7-8kb)  | 22      | 44606939  | 44625419  | 7242          | NA              | LINC00229    |
| NR4A2_R848   | chr22   | 44717635  | 44718035  | Promoter (7-8kb)  | 22      | 44725246  | 44809801  | -7211         | ENSG00000248405 | PRR5-ARHGAP8 |
| NR4A2_R848   | chr22   | 44800080  | 44800480  | Promoter (1-2kb)  | 22      | 44801820  | 44825551  | -1340         | ENSG00000241484 | ARHGAP8      |
| NR4A2_R848   | chr22   | 45291458  | 45291858  | Promoter (6-7kb)  | 22      | 45284991  | 45295822  | 6467          | ENSG00000100373 | UPK3A        |
| NR4A2_R848   | chr22   | 45495786  | 45496186  | Promoter (6-7kb)  | 22      | 45502238  | 45531324  | -6052         | ENSG00000077942 | FBLN1        |
| NR4A2_R848   | chr22   | 45966545  | 45966945  | Promoter (5-6kb)  | 22      | 45922111  | 45972715  | 5770          | ENSG00000188064 | WNT7B        |
| NR4A2_R848   | chr22   | 46290257  | 46290657  | Promoter (1-2kb)  | 22      | 46288510  | 46292933  | 1747          | ENSG00000075234 | TTC38        |
| NR4A2_R848   | chr22   | 46372120  | 46372520  | Promoter (5-6kb)  | 22      | 46372913  | 46377624  | 5104          | ENSG00000075275 | CELSR1       |
| NR4A2_R848   | chr22   | 46539743  | 46540143  | Promoter (2-3kb)  | 22      | 46360834  | 46537170  | -2573         | ENSG00000075275 | CELSR1       |
| NR4A2_R848   | chr22   | 46621605  | 46622005  | Promoter (1-2kb)  | 22      | 46620386  | 46679785  | 1219          | ENSG00000075240 | GRAMD4       |
| NR4A2_R848   | chr22   | 46665695  | 46666095  | Promoter (2-3kb)  | 22      | 46663107  | 46671167  | 2588          | ENSG00000075240 | GRAMD4       |
| NR4A2_R848   | chr22   | 46680480  | 46680880  | Promoter (5-6kb)  | 22      | 46674608  | 46679683  | 5872          | ENSG00000075240 | GRAMD4       |
| NR4A2_R848   | chr22   | 47628238  | 47628996  | Promoter (<=1kb)  | 22      | 47625230  | 47629902  | 906           | ENSG00000205634 | LINC00898    |
| NR4A2_R848   | chr22   | 48269047  | 48269447  | Promoter (4-5kb)  | 22      | 48274364  | 48274415  | -4917         | ENSG00000266508 | MIR3201      |
| NR4A2_R848   | chr22   | 48542278  | 48542800  | Promoter (4-5kb)  | 22      | 48538902  | 48547342  | 4542          | ENSG00000281732 | LOC284933    |
| NR4A2_R848   | chr22   | 48565930  | 48566330  | Promoter (9-10kb) | 22      | 48576306  | 48751932  | -9976         | ENSG00000219438 | TAFA5        |
| NR4A2_R848   | chr22   | 48584511  | 48584911  | Promoter (8-9kb)  | 22      | 48576453  | 48750488  | 8058          | ENSG00000219438 | TAFA5        |
| NR4A2_R848   | chr22   | 48697641  | 48698041  | Promoter (4-5kb)  | 22      | 48693247  | 48750408  | 4394          | ENSG00000219438 | TAFA5        |
| NR4A2_R848   | chr22   | 49627242  | 49627642  | Promoter (<=1kb)  | 22      | 49624167  | 49626894  | -348          | ENSG00000188511 | C22orf34     |
| NR4A2_R848   | chr22   | 50080926  | 50081326  | Promoter (4-5kb)  | 22      | 50059391  | 50085354  | 4028          | ENSG00000100427 | MLC1         |
| NR4A2_R848   | chr22   | 50234744  | 50235144  | Promoter (5-6kb)  | 22      | 50226735  | 50240360  | 5216          | ENSG00000128159 | TUBGCP6      |
| NR4A2_R848   | chr22   | 50311081  | 50311481  | Promoter (3-4kb)  | 22      | 50274979  | 50307646  | -3435         | ENSG00000196576 | PLXNB2       |
| NR4A2_R848   | chr22   | 50339674  | 50340428  | Promoter (2-3kb)  | 22      | 50343304  | 50445090  | -2876         | ENSG00000100239 | PPP6R2       |
| NR4A2_R848   | chr22   | 50462332  | 50462732  | Promoter (4-5kb)  | 22      | 50466196  | 50467355  | 4623          | ENSG00000100241 | SBF1         |
| NR4A3_Medium | chr1    | 631779    | 632179    | Promoter (<=1kb)  | 1       | 594198    | 631204    | -575          | ENSG00000230021 | LOC101928626 |
| NR4A3_Medium | chr1    | 1056189   | 1056589   | Promoter (3-4kb)  | 1       | 1059708   | 1066459   | -3119         | ENSG00000217801 | LOC100288175 |
| NR4A3_Medium | chr1    | 1595019   | 1595419   | Promoter (4-5kb)  | 1       | 1598012   | 1600135   | 4716          | ENSG00000228594 | FNDC10       |
| NR4A3_Medium | chr1    | 2346584   | 2346984   | Promoter (4-5kb)  | 1       | 2351644   | 2351857   | 4873          | ENSG00000269896 | LOC100129534 |
| NR4A3_Medium | chr1    | 2435872   | 2436272   | Promoter (9-10kb) | 1       | 2425980   | 2479804   | 9892          | ENSG00000149527 | PLCH2        |
| NR4A3_Medium | chr1    | 3025927   | 3026327   | Promoter (4-5kb)  | 1       | 3021467   | 3022903   | 4460          | ENSG00000169717 | ACTRT2       |
| NR4A3_Medium | chr1    | 3941753   | 3942153   | Promoter (1-2kb)  | 1       | 3940617   | 3955262   | 1136          | NA              | LINC01346    |
| NR4A3_Medium | chr1    | 6175131   | 6175531   | Promoter (4-5kb)  | 1       | 6105091   | 6180023   | 4492          | ENSG00000116254 | CHD5         |
| NR4A3_Medium | chr1    | 8322070   | 8322470   | Promoter (1-2kb)  | 1       | 8324330   | 8344167   | -1860         | ENSG00000162426 | SLC45A1      |
| NR4A3_Medium | chr1    | 11042302  | 11042702  | Promoter (<=1kb)  | 1       | 11037693  | 11043198  | 496           | ENSG00000009724 | MASP2        |
| NR4A3_Medium | chr1    | 12582908  | 12583450  | Promoter (3-4kb)  | 1       | 12578957  | 12579023  | -3885         | ENSG00000276830 | MIR6730      |
| NR4A3_Medium | chr1    | 12585190  | 12585590  | Promoter (6-7kb)  | 1       | 12578957  | 12579023  | -6167         | ENSG00000276830 | MIR6730      |
| NR4A3_Medium | chr1    | 12644828  | 12645228  | Promoter (<=1kb)  | 1       | 12644547  | 12667086  | 281           | ENSG00000204518 | AADA4L4      |
| NR4A3_Medium | chr1    | 16142702  | 16143102  | Promoter (3-4kb)  | 1       | 16134560  | 16146450  | 3348          | ENSG00000142627 | EPHA2        |
| NR4A3_Medium | chr1    | 18858176  | 18858576  | Promoter (1-2kb)  | 1       | 18839599  | 18859682  | 1106          | ENSG00000179002 | TAS1R2       |
| NR4A3_Medium | chr1    | 20702984  | 20703384  | Promoter (4-5kb)  | 1       | 20664014  | 20698439  | -4545         | ENSG00000117245 | KIF17        |
| NR4A3_Medium | chr1    | 21433683  | 21434083  | Promoter (6-7kb)  | 1       | 21440128  | 21483467  | -6045         | ENSG00000142794 | NBPF3        |
| NR4A3_Medium | chr1    | 21437141  | 21437541  | Promoter (2-3kb)  | 1       | 21440128  | 21483467  | -2587         | ENSG00000142794 | NBPF3        |
| NR4A3_Medium | chr1    | 22659016  | 22659416  | Promoter (5-6kb)  | 1       | 22653236  | 22661637  | 5780          | ENSG00000173369 | C1QB         |
| NR4A3_Medium | chr1    | 23625861  | 23626261  | Promoter (1-2kb)  | 1       | 23627334  | 23640568  | -1073         | ENSG00000197880 | MDS2         |
| NR4A3_Medium | chr1    | 25767741  | 25768141  | Promoter (3-4kb)  | 1       | 25772069  | 25782700  | -3928         | ENSG00000117643 | MAN1C1       |
| NR4A3_Medium | chr1    | 25768428  | 25768828  | Promoter (3-4kb)  | 1       | 25772069  | 25782700  | -3241         | ENSG00000117643 | MAN1C1       |
| NR4A3_Medium | chr1    | 26028794  | 26029194  | Promoter (2-3kb)  | 1       | 26032130  | 26035004  | -2936         | ENSG00000158008 | EXTL1        |
| NR4A3_Medium | chr1    | 26951527  | 26951927  | Promoter (6-7kb)  | 1       | 26945135  | 26946184  | 6392          | ENSG00000090273 | NUDC         |
| NR4A3_Medium | chr1    | 34777584  | 34777984  | Promoter (3-4kb)  | 1       | 34781214  | 34786364  | -3230         | ENSG00000188910 | GJB3         |
| NR4A3_Medium | chr1    | 43423717  | 43424117  | Promoter (2-3kb)  | 1       | 43420757  | 43429489  | 2960          | ENSG00000198198 | SZT2         |
| NR4A3_Medium | chr1    | 43871429  | 43871829  | Promoter (7-8kb)  | 1       | 43879244  | 43930838  | -7415         | ENSG00000126091 | ST3GAL3      |
| NR4A3_Medium | chr1    | 43922738  | 43923138  | Promoter (3-4kb)  | 1       | 43919113  | 43931139  | 3625          | ENSG00000126091 | ST3GAL3      |
| NR4A3_Medium | chr1    | 46512872  | 46513272  | Promoter (5-6kb)  | 1       | 46506997  | 46514226  | 5875          | ENSG00000197587 | DMBX1        |
| NR4A3_Medium | chr1    | 53098229  | 53098629  | Promoter (7-8kb)  | 1       | 53087184  | 53090982  | -7247         | ENSG00000162383 | SLC1A7       |
| NR4A3_Medium | chr1    | 110410220 | 110410620 | Promoter (<=1kb)  | 1       | 110411020 | 110418356 | -400          | NA              | LAMTOR5-AS1  |
| NR4A3_Medium | chr1    | 178504511 | 178504911 | Promoter (8-9kb)  | 1       | 178513109 | 178522650 | -8198         | ENSG00000240021 | TEX35        |
| NR4A3_Medium | chr1    | 182236636 | 182237036 | Promoter (7-8kb)  | 1       | 182129310 | 182244399 | 7363          | NA              | LINC01344    |
| NR4A3_Medium | chr1    | 201108926 | 201109326 | Promoter (3-4kb)  | 1       | 201039512 | 201112426 | 3100          | ENSG00000081248 | CACNA1S      |
| NR4A3_Medium | chr1    | 202205216 | 202205625 | Promoter (1-2kb)  | 1       | 202203777 | 202319690 | 1439          | ENSG00000133067 | LGR6         |
| NR4A3_Medium | chr1    | 204195081 | 204195702 | Promoter (<=1kb)  | 1       | 204190341 | 204196491 | 789           | ENSG00000170498 | KISS1        |
| NR4A3_Medium | chr1    | 205048639 | 205049039 | Promoter (5-6kb)  | 1       | 205043212 | 205078289 | 5427          | ENSG00000184144 | CNTN2        |
| NR4A3_Medium | chr1    | 226944501 | 226944901 | Promoter (4-5kb)  | 1       | 226940379 | 226977523 | 4122          | ENSG00000163050 | COQ8A        |
| NR4A3_Medium | chr1    | 227560219 | 227560692 | Promoter (2-3kb)  | 1       | 227563543 | 227677443 | -2851         | ENSG00000181450 | ZNF678       |
| NR4A3_Medium | chr1    | 228071071 | 228071471 | Promoter (5-6kb)  | 1       | 228073909 | 228076550 | 5079          | ENSG00000276255 | LINC02809    |
| NR4A3_Medium | chr1    | 228207031 | 228207431 | Promoter (<=1kb)  | 1       | 228203722 | 228206558 | -473          | ENSG00000162913 | OBSCN-AS1    |
| NR4A3_Medium | chr1    | 228319249 | 228319649 | Promoter (9-10kb) | 1       | 228309484 | 228316119 | 9765          | ENSG00000154358 | OBSCN        |
| NR4A3_Medium | chr1    | 228622085 | 228622485 | Promoter (<=1kb)  | 1       | 228621447 | 228621565 | -520          | ENSG00000199352 | RNA5S1       |
| NR4A3_Medium | chr2    | 878023    | 878423    | Promoter (9-10kb) | 2       | 791614    | 868608    | -9415         | ENSG00000237667 | LINC01115    |
| NR4A3_Medium | chr2    | 1866429   | 1867020   | Promoter (4-5kb)  | 2       | 1789241   | 1861677   | -4752         | ENSG00000186487 | MYT1L        |
| NR4A3_Medium | chr2    | 6759925   | 6760422   | Promoter (9-10kb) | 2       | 6729168   | 6770311   | 9889          | ENSG00000205837 | LINC00487    |
| NR4A3_Medium | chr2    | 10190111  | 10190511  | Promoter (2-3kb)  | 2       | 10192614  | 10192671  | 2160          | ENSG00000265418 | MIR4261      |
| NR4A3_Medium | chr2    | 10312386  | 10312929  | Promoter (8-9kb)  | 2       | 10303700  | 10427617  | 8686          | ENSG00000115756 | HPCAL1       |
| NR4A3_Medium | chr2    | 10680216  | 10680616  | Promoter (8-9kb)  | 2       | 10622023  | 10671690  | -8526         | ENSG00000115761 | NOL10        |
| NR4A3_Medium | chr2    | 71571716  | 71572472  | Promoter (1-2kb)  | 2       | 71570138  | 71570916  | 1578          | ENSG00000135636 | DYSF         |

| Condition    | peakChr | peakStart | peakEnd   | annotation        | geneChr | geneStart | geneEnd   | distanceToTSS | geneID          | geneSymbol   |
|--------------|---------|-----------|-----------|-------------------|---------|-----------|-----------|---------------|-----------------|--------------|
| NR4A3_Medium | chr2    | 216099029 | 216099552 | Promoter (7-8kb)  | 2       | 216107464 | 216206303 | -7912         | ENSG00000079246 | XRCC5        |
| NR4A3_Medium | chr2    | 217989996 | 217990396 | Promoter (<=1kb)  | 2       | 217799795 | 217991014 | 618           | ENSG00000079308 | TNS1         |
| NR4A3_Medium | chr2    | 231005344 | 231005744 | Promoter (2-3kb)  | 2       | 231002771 | 231025055 | 2573          | ENSG00000173699 | SPATA3       |
| NR4A3_Medium | chr2    | 233014778 | 233015178 | Promoter (1-2kb)  | 2       | 232878701 | 233013256 | -1522         | ENSG00000066248 | NGEF         |
| NR4A3_Medium | chr2    | 237397276 | 237397676 | Promoter (<=1kb)  | 2       | 237324774 | 237396817 | -459          | ENSG00000163359 | COL6A3       |
| NR4A3_Medium | chr2    | 237522946 | 237523346 | Promoter (2-3kb)  | 2       | 237525674 | 237527683 | -2328         | ENSG00000115648 | MLPH         |
| NR4A3_Medium | chr2    | 237566045 | 237566445 | Promoter (<=1kb)  | 2       | 237566574 | 237567175 | -129          | ENSG00000071677 | PRLH         |
| NR4A3_Medium | chr2    | 238118403 | 238118840 | Promoter (8-9kb)  | 2       | 238127390 | 238133287 | -8550         | ENSG00000144488 | ESPNL        |
| NR4A3_Medium | chr2    | 239092031 | 239092431 | Promoter (6-7kb)  | 2       | 239085827 | 239085926 | -6105         | ENSG00000264810 | MIR4441      |
| NR4A3_Medium | chr2    | 240147455 | 240147855 | Promoter (2-3kb)  | 2       | 240139026 | 240144562 | -2893         | ENSG00000178602 | OTOS         |
| NR4A3_Medium | chr2    | 240527247 | 240527647 | Promoter (<=1kb)  | 2       | 240521939 | 240527881 | 234           | ENSG00000144504 | ANKMY1       |
| NR4A3_Medium | chr2    | 240744799 | 240745199 | Promoter (<=1kb)  | 2       | 240713816 | 240744687 | -112          | ENSG00000130294 | KIF1A        |
| NR4A3_Medium | chr2    | 240951157 | 240951557 | Promoter (1-2kb)  | 2       | 240949655 | 240950929 | 1502          | ENSG00000226321 | CROCC2       |
| NR4A3_Medium | chr3    | 13614839  | 13615239  | Promoter (<=1kb)  | 3       | 13613898  | 13618993  | 941           | ENSG00000163520 | FBLN2        |
| NR4A3_Medium | chr3    | 13868809  | 13869209  | Promoter (5-6kb)  | 3       | 13863668  | 13875113  | 5904          | ENSG00000154764 | WNT7A        |
| NR4A3_Medium | chr3    | 49127444  | 49127844  | Promoter (<=1kb)  | 3       | 49125005  | 49128556  | 712           | ENSG00000172037 | LAMB2        |
| NR4A3_Medium | chr3    | 58652271  | 58652671  | Promoter (5-6kb)  | 3       | 58637155  | 58657696  | 5025          | ENSG00000198643 | FAM3D        |
| NR4A3_Medium | chr3    | 58662998  | 58663398  | Promoter (3-4kb)  | 3       | 58633946  | 58666774  | 3376          | ENSG00000198643 | FAM3D        |
| NR4A3_Medium | chr3    | 75669063  | 75669501  | Promoter (2-3kb)  | 3       | 75672300  | 75742048  | -2799         | ENSG00000242516 | LINC00960    |
| NR4A3_Medium | chr3    | 109340916 | 109341316 | Promoter (3-4kb)  | 3       | 109326141 | 109337572 | -3344         | ENSG00000121570 | DPPA4        |
| NR4A3_Medium | chr3    | 126212160 | 126212692 | Promoter (4-5kb)  | 3       | 126207255 | 126210166 | 4905          | ENSG00000246022 | ALDH1L1-AS2  |
| NR4A3_Medium | chr3    | 126414411 | 126414811 | Promoter (1-2kb)  | 3       | 126416335 | 126416863 | -1524         | ENSG00000163885 | CFAP100      |
| NR4A3_Medium | chr3    | 126864258 | 126864779 | Promoter (9-10kb) | 3       | 126854864 | 126949879 | 9394          | ENSG00000159685 | CHCHD6       |
| NR4A3_Medium | chr3    | 129516876 | 129517344 | Promoter (4-5kb)  | 3       | 129512381 | 129514820 | 4495          | ENSG00000163913 | IFT122       |
| NR4A3_Medium | chr3    | 194352402 | 194352802 | Promoter (1-2kb)  | 3       | 194339768 | 194351328 | -1074         | ENSG00000178772 | CPN2         |
| NR4A3_Medium | chr4    | 821993    | 822555    | Promoter (3-4kb)  | 4       | 784958    | 826092    | 3537          | ENSG00000168993 | CPLX1        |
| NR4A3_Medium | chr4    | 2447292   | 2447692   | Promoter (4-5kb)  | 4       | 2443215   | 2450356   | 4077          | ENSG00000206113 | CFAP99       |
| NR4A3_Medium | chr4    | 3678437   | 3678837   | Promoter (<=1kb)  | 4       | 3673593   | 3677855   | -582          | ENSG00000250632 | LINC02171    |
| NR4A3_Medium | chr4    | 6579028   | 6579519   | Promoter (3-4kb)  | 4       | 6575215   | 6622401   | 3813          | ENSG00000132888 | MAN2B2       |
| NR4A3_Medium | chr4    | 6660347   | 6660747   | Promoter (2-3kb)  | 4       | 6663396   | 6676755   | -2649         | ENSG00000170846 | LOC93622     |
| NR4A3_Medium | chr4    | 6725442   | 6725842   | Promoter (9-10kb) | 4       | 6716174   | 6717664   | 9268          | ENSG00000186222 | BLOC1S4      |
| NR4A3_Medium | chr4    | 7387624   | 7388024   | Promoter (5-6kb)  | 4       | 7381898   | 7661529   | 5726          | ENSG00000184985 | SORCS2       |
| NR4A3_Medium | chr4    | 7724607   | 7725007   | Promoter (9-10kb) | 4       | 7734280   | 7740720   | -9273         | ENSG00000184985 | SORCS2       |
| NR4A3_Medium | chr4    | 8011906   | 8012504   | Promoter (1-2kb)  | 4       | 8007385   | 8010728   | -1178         | ENSG00000163995 | ABLIM2       |
| NR4A3_Medium | chr4    | 8069556   | 8069956   | Promoter (1-2kb)  | 4       | 8008063   | 8071827   | 1871          | ENSG00000163995 | ABLIM2       |
| NR4A3_Medium | chr4    | 26492607  | 26493007  | Promoter (2-3kb)  | 4       | 26481396  | 26490484  | -2123         | ENSG00000163394 | CCKAR        |
| NR4A3_Medium | chr4    | 56687961  | 56688361  | Promoter (6-7kb)  | 4       | 56647988  | 56681899  | -6062         | ENSG00000171476 | HOPX         |
| NR4A3_Medium | chr4    | 108180509 | 108180909 | Promoter (7-8kb)  | 4       | 108173419 | 108176430 | 7090          | ENSG00000232021 | LEF1-AS1     |
| NR4A3_Medium | chr4    | 127688870 | 127689270 | Promoter (1-2kb)  | 4       | 127687814 | 127705772 | 1056          | ENSG00000164066 | INTU         |
| NR4A3_Medium | chr4    | 148942205 | 148942605 | Promoter (<=1kb)  | 4       | 148940941 | 148942378 | 0             | ENSG00000249317 | LOC105377480 |
| NR4A3_Medium | chr4    | 186605194 | 186605594 | Promoter (3-4kb)  | 4       | 186600331 | 186601700 | -3494         | ENSG00000083857 | FAT1         |
| NR4A3_Medium | chr4    | 190067607 | 190068007 | Promoter (2-3kb)  | 4       | 190065233 | 190065914 | 2374          | ENSG00000281591 | DBET         |
| NR4A3_Medium | chr5    | 146376    | 146776    | Promoter (5-6kb)  | 5       | 140566    | 157110    | 5810          | ENSG00000153404 | PLEKHG4B     |
| NR4A3_Medium | chr5    | 856070    | 856470    | Promoter (5-6kb)  | 5       | 795607    | 850986    | -5084         | ENSG00000188818 | ZDHHC11      |
| NR4A3_Medium | chr5    | 856719    | 857119    | Promoter (5-6kb)  | 5       | 795607    | 850986    | -5733         | ENSG00000188818 | ZDHHC11      |
| NR4A3_Medium | chr5    | 1199262   | 1199662   | Promoter (1-2kb)  | 5       | 1201595   | 1223270   | -1933         | ENSG00000174358 | SLC6A19      |
| NR4A3_Medium | chr5    | 6447149   | 6447549   | Promoter (1-2kb)  | 5       | 6448859   | 6496723   | -1310         | ENSG00000215218 | UBE2QL1      |
| NR4A3_Medium | chr5    | 6447897   | 6448297   | Promoter (<=1kb)  | 5       | 6448859   | 6496723   | -562          | ENSG00000215218 | UBE2QL1      |
| NR4A3_Medium | chr5    | 14402946  | 14403346  | Promoter (2-3kb)  | 5       | 14406214  | 14419904  | -2868         | ENSG00000038382 | TRIO         |
| NR4A3_Medium | chr5    | 61731325  | 61731725  | Promoter (3-4kb)  | 5       | 61732774  | 61735668  | 3943          | ENSG00000251575 | C5orf64-AS1  |
| NR4A3_Medium | chr5    | 149314053 | 149314453 | Promoter (1-2kb)  | 5       | 149315640 | 149341802 | -1187         | ENSG00000157510 | AFAP1L1      |
| NR4A3_Medium | chr5    | 170754783 | 170755183 | Promoter (8-9kb)  | 5       | 170763350 | 170797521 | -8167         | ENSG00000094755 | GABRP        |
| NR4A3_Medium | chr5    | 172056540 | 172056940 | Promoter (3-4kb)  | 5       | 172043111 | 172053200 | -3340         | ENSG00000072786 | STK10        |
| NR4A3_Medium | chr5    | 176132922 | 176133322 | Promoter (9-10kb) | 5       | 176123834 | 176125138 | 9088          | NA              | NA           |
| NR4A3_Medium | chr5    | 176524797 | 176525197 | Promoter (4-5kb)  | 5       | 176529078 | 176529808 | 4611          | ENSG00000146083 | RNF44        |
| NR4A3_Medium | chr5    | 176745714 | 176746114 | Promoter (2-3kb)  | 5       | 176743205 | 176743871 | 2509          | ENSG00000248859 | LINC01574    |
| NR4A3_Medium | chr5    | 178269437 | 178269837 | Promoter (3-4kb)  | 5       | 178263208 | 178265834 | -3603         | ENSG00000050767 | COL23A1      |
| NR4A3_Medium | chr5    | 180213512 | 180213912 | Promoter (4-5kb)  | 5       | 180100795 | 180209211 | -4301         | ENSG00000146090 | RASGEF1C     |
| NR4A3_Medium | chr6    | 18565608  | 18566008  | Promoter (5-6kb)  | 6       | 18571784  | 18571880  | -5776         | ENSG00000207775 | MIR548A1     |
| NR4A3_Medium | chr6    | 34059371  | 34059771  | Promoter (3-4kb)  | 6       | 34040711  | 34056323  | -3048         | ENSG00000124493 | GRM4         |
| NR4A3_Medium | chr6    | 34072868  | 34073268  | Promoter (9-10kb) | 6       | 34022138  | 34063635  | -9233         | ENSG00000124493 | GRM4         |
| NR4A3_Medium | chr6    | 34111311  | 34111711  | Promoter (<=1kb)  | 6       | 34022433  | 34111034  | -277          | ENSG00000124493 | GRM4         |
| NR4A3_Medium | chr6    | 37664666  | 37665066  | Promoter (<=1kb)  | 6       | 37655880  | 37664316  | -350          | ENSG00000112139 | MDGA1        |
| NR4A3_Medium | chr6    | 42445061  | 42445461  | Promoter (5-6kb)  | 6       | 42228126  | 42451261  | 5800          | ENSG00000124496 | TRERF1       |
| NR4A3_Medium | chr6    | 61574072  | 61574807  | Promoter (<=1kb)  | 6       | 61574328  | 61574402  | 0             | NA              | MTRNR2L9     |
| NR4A3_Medium | chr6    | 111082200 | 111082600 | Promoter (4-5kb)  | 6       | 111087503 | 111177706 | -4903         | ENSG00000112394 | SLC16A10     |
| NR4A3_Medium | chr6    | 157630512 | 157630912 | Promoter (<=1kb)  | 6       | 157630314 | 157673529 | 198           | ENSG00000175048 | ZDHHC14      |
| NR4A3_Medium | chr6    | 166415995 | 166416395 | Promoter (7-8kb)  | 6       | 166412296 | 166423984 | 7589          | ENSG00000071242 | RPS6KA2      |
| NR4A3_Medium | chr6    | 167169335 | 167169735 | Promoter (<=1kb)  | 6       | 167170619 | 167182908 | -884          | NA              | TCP10L2      |
| NR4A3_Medium | chr6    | 169218853 | 169219253 | Promoter (4-5kb)  | 6       | 169217454 | 169223440 | 4187          | ENSG00000186340 | THBS2        |
| NR4A3_Medium | chr6    | 169236053 | 169236453 | Promoter (<=1kb)  | 6       | 169234510 | 169237412 | 959           | ENSG00000186340 | THBS2        |
| NR4A3_Medium | chr7    | 1578267   | 1578667   | Promoter (7-8kb)  | 7       | 1567613   | 1571005   | -7262         | ENSG00000157778 | PSMG3        |
| NR4A3_Medium | chr7    | 1618765   | 1619165   | Promoter (4-5kb)  | 7       | 1614590   | 1615325   | 4175          | NA              | TFAMP1       |
| NR4A3_Medium | chr7    | 1938974   | 1939374   | Promoter (1-2kb)  | 7       | 1898200   | 1940549   | 1175          | ENSG00000002822 | MAD1L1       |
| NR4A3_Medium | chr7    | 8152544   | 8152944   | Promoter (4-5kb)  | 7       | 8141765   | 8157764   | 4820          | ENSG00000003147 | ICA1         |
| NR4A3_Medium | chr7    | 27252300  | 27252700  | Promoter (5-6kb)  | 7       | 27241429  | 27247229  | -5071         | ENSG00000253405 | EVX1-AS      |
| NR4A3_Medium | chr7    | 31077309  | 31077709  | Promoter (9-10kb) | 7       | 31086971  | 31104899  | -9262         | ENSG00000078549 | ADCYAP1R1    |
| NR4A3_Medium | chr7    | 43247657  | 43248057  | Promoter (1-2kb)  | 7       | 43249137  | 43311993  | -1080         | ENSG00000002746 | HECW1        |
| NR4A3_Medium | chr7    | 45077968  | 45078368  | Promoter (3-4kb)  | 7       | 45080979  | 45081400  | 3032          | ENSG00000136274 | NACAD        |
| NR4A3_Medium | chr7    | 47448004  | 47448404  | Promoter (4-5kb)  | 7       | 47435282  | 47453231  | 4827          | ENSG00000136205 | TNS3         |
| NR4A3_Medium | chr7    | 50335229  | 50335629  | Promoter (7-8kb)  | 7       | 50327649  | 50400009  | 7580          | ENSG00000185811 | IKZF1        |
| NR4A3_Medium | chr7    | 54545243  | 54545643  | Promoter (<=1kb)  | 7       | 54546161  | 54569489  | -518          | ENSG00000170419 | VSTM2A       |
| NR4A3_Medium | chr7    | 57173811  | 57174211  | Promoter (5-6kb)  | 7       | 57177409  | 57180052  | 5841          | NA              | GUSBP10      |
| NR4A3_Medium | chr7    | 57181490  | 57181890  | Promoter (1-2kb)  | 7       | 57177409  | 57180052  | -1438         | NA              | GUSBP10      |
| NR4A3_Medium | chr7    | 66823235  | 66823635  | Promoter (9-10kb) | 7       | 66815836  | 66833026  | 9391          | ENSG00000230583 | GTF2IRD1P1   |
| NR4A3_Medium | chr7    | 72870382  | 72870782  | Promoter (<=1kb)  | 7       | 72863903  | 72871581  | 799           | ENSG00000179994 | SPDYE7P      |
| NR4A3_Medium | chr7    | 73428090  | 73428490  | Promoter (5-6kb)  | 7       | 73433778  | 73436120  | -5288         | ENSG00000188763 | FZD9         |
| NR4A3_Medium | chr7    | 74052576  | 74052976  | Promoter (<=1kb)  | 7       | 74052851  | 74056347  | 0             | ENSG00000049540 | ELN          |
| NR4A3_Medium | chr7    | 74371151  | 74371551  | Promoter (4-5kb)  | 7       | 74376070  | 74381041  | -4519         | ENSG00000106665 | CLIP2        |
| NR4A3_Medium | chr7    | 76290301  | 76290701  | Promoter (7-8kb)  | 7       | 76282614  | 76287288  | 7687          | ENSG00000177679 | SRRM3        |
| NR4A3_Medium | chr7    | 87209317  | 87209717  | Promoter (6-7kb)  | 7       | 87197718  | 87203043  | -6274         | ENSG00000135185 | TMEM243      |
| NR4A3_Medium | chr7    | 92423589  | 92423989  | Promoter (9-10kb) | 7       | 92412979  | 92433431  | 9442          | ENSG00000230927 | TMBIM7P      |
| NR4A3_Medium | chr7    | 100580304 | 100580704 | Promoter (<=1kb)  | 7       | 100574660 | 100580873 | 169           | ENSG00000077454 | LRCH4        |
| NR4A3_Medium | chr7    | 100958503 | 100958914 | Promoter (<=1kb)  | 7       | 100957965 | 100967890 | 538           | ENSG00000169894 | MUC3A        |
| NR4A3_Medium | chr7    | 101556663 | 101557063 | Promoter (3-4kb)  | 7       | 101553203 | 101557633 | 3460          | ENSG00000160963 | COL26A1      |
| NR4A3_Medium | chr7</  |           |           |                   |         |           |           |               |                 |              |



| Condition    | peakChr | peakStart | peakEnd   | annotation        | geneChr | geneStart | geneEnd   | distanceToTSS | geneID          | geneSymbol   |
|--------------|---------|-----------|-----------|-------------------|---------|-----------|-----------|---------------|-----------------|--------------|
| NR4A3_Medium | chr8    | 37559341  | 37559741  | Promoter (5-6kb)  | 8       | 37450763  | 37554183  | -5158         | ENSG00000253414 | LINC01605    |
| NR4A3_Medium | chr8    | 42451989  | 42452389  | Promoter (7-8kb)  | 8       | 42439467  | 42460168  | 7779          | ENSG00000168575 | SLC20A2      |
| NR4A3_Medium | chr8    | 85714528  | 85714928  | Promoter (<=1kb)  | 8       | 85714922  | 85715833  | 0             | ENSG00000277422 | REXO1L2P     |
| NR4A3_Medium | chr8    | 105533989 | 105534389 | Promoter (5-6kb)  | 8       | 105528884 | 105803597 | 5105          | ENSG00000169946 | ZFPM2        |
| NR4A3_Medium | chr8    | 134590583 | 134590983 | Promoter (3-4kb)  | 8       | 134512574 | 134594885 | 3902          | ENSG00000066827 | ZFAT         |
| NR4A3_Medium | chr8    | 142190751 | 142191151 | Promoter (7-8kb)  | 8       | 142198356 | 142209003 | -7205         | ENSG00000254008 | LINC00051    |
| NR4A3_Medium | chr8    | 142192812 | 142193212 | Promoter (5-6kb)  | 8       | 142198356 | 142209003 | -5144         | ENSG00000254008 | LINC00051    |
| NR4A3_Medium | chr8    | 142207368 | 142207768 | Promoter (9-10kb) | 8       | 142198356 | 142209003 | 9012          | ENSG00000254008 | LINC00051    |
| NR4A3_Medium | chr8    | 142469557 | 142469957 | Promoter (5-6kb)  | 8       | 142464016 | 142545006 | 5541          | ENSG00000181790 | ADGRB1       |
| NR4A3_Medium | chr8    | 142481995 | 142482395 | Promoter (2-3kb)  | 8       | 142479120 | 142540020 | 2875          | ENSG00000181790 | ADGRB1       |
| NR4A3_Medium | chr8    | 142744165 | 142744565 | Promoter (1-2kb)  | 8       | 142740949 | 142742406 | -1759         | ENSG00000126233 | SLURP1       |
| NR4A3_Medium | chr8    | 143296026 | 143296426 | Promoter (4-5kb)  | 8       | 143291422 | 143295812 | 4604          | ENSG00000185730 | ZNF696       |
| NR4A3_Medium | chr8    | 143376743 | 143377143 | Promoter (2-3kb)  | 8       | 143379337 | 143382779 | -2194         | ENSG00000158106 | RHPN1        |
| NR4A3_Medium | chr8    | 144020353 | 144020832 | Promoter (7-8kb)  | 8       | 143985891 | 144012772 | -7581         | ENSG00000178685 | PARP10       |
| NR4A3_Medium | chr9    | 38629401  | 38629801  | Promoter (8-9kb)  | 9       | 38621088  | 38624990  | 8313          | NA              | FAM201A      |
| NR4A3_Medium | chr9    | 41229406  | 41230060  | Promoter (3-4kb)  | 9       | 41233755  | 41233835  | -3695         | ENSG00000276029 | MIR4477A     |
| NR4A3_Medium | chr9    | 61856658  | 61857058  | Promoter (2-3kb)  | 9       | 61854216  | 62076341  | 2442          | ENSG00000231527 | FAM27C       |
| NR4A3_Medium | chr9    | 62799532  | 62799932  | Promoter (1-2kb)  | 9       | 62801461  | 62810186  | -1529         | ENSG00000238113 | LINC01410    |
| NR4A3_Medium | chr9    | 63823292  | 63823962  | Promoter (3-4kb)  | 9       | 63819574  | 63819654  | 3718          | ENSG00000266017 | MIR4477B     |
| NR4A3_Medium | chr9    | 87869546  | 87869946  | Promoter (9-10kb) | 9       | 87858103  | 87859599  | -9947         | NA              | LOC392364    |
| NR4A3_Medium | chr9    | 92803669  | 92804069  | Promoter (5-6kb)  | 9       | 92809388  | 92888693  | -5319         | ENSG00000187984 | ANKRD19P     |
| NR4A3_Medium | chr9    | 123347598 | 123347998 | Promoter (8-9kb)  | 9       | 123356170 | 123374099 | -8172         | ENSG00000148204 | CRB2         |
| NR4A3_Medium | chr9    | 127402810 | 127403210 | Promoter (<=1kb)  | 9       | 127403278 | 127405469 | -68           | ENSG00000136856 | SLC2A8       |
| NR4A3_Medium | chr9    | 127736460 | 127736860 | Promoter (1-2kb)  | 9       | 127731844 | 127735313 | -1147         | ENSG00000160404 | TOR2A        |
| NR4A3_Medium | chr9    | 130454856 | 130455256 | Promoter (2-3kb)  | 9       | 130452223 | 130471514 | 2633          | ENSG00000130707 | ASS1         |
| NR4A3_Medium | chr9    | 132577218 | 132577618 | Promoter (4-5kb)  | 9       | 132582606 | 132590252 | -4988         | ENSG00000125492 | BARHL1       |
| NR4A3_Medium | chr9    | 133933879 | 133934279 | Promoter (5-6kb)  | 9       | 133925851 | 133939301 | 5022          | ENSG00000160293 | VAV2         |
| NR4A3_Medium | chr9    | 134826631 | 134827031 | Promoter (1-2kb)  | 9       | 134824722 | 134832876 | 1909          | ENSG00000130635 | COL5A1       |
| NR4A3_Medium | chr9    | 135691324 | 135691724 | Promoter (7-8kb)  | 9       | 135693407 | 135699528 | 7804          | ENSG00000165643 | SOHLH1       |
| NR4A3_Medium | chr9    | 135726778 | 135727189 | Promoter (9-10kb) | 9       | 135736517 | 135793618 | -9328         | ENSG00000107147 | KCNT1        |
| NR4A3_Medium | chr9    | 135773916 | 135774316 | Promoter (1-2kb)  | 9       | 135772858 | 135784858 | 1058          | ENSG00000107147 | KCNT1        |
| NR4A3_Medium | chr9    | 135836288 | 135836688 | Promoter (9-10kb) | 9       | 135810423 | 135826409 | -9879         | ENSG00000130559 | CAMSAP1      |
| NR4A3_Medium | chr9    | 136309891 | 136310291 | Promoter (2-3kb)  | 9       | 136281380 | 136306901 | -2990         | ENSG00000260220 | CCDC187      |
| NR4A3_Medium | chr9    | 136818308 | 136818708 | Promoter (2-3kb)  | 9       | 136821329 | 136841187 | -2621         | ENSG00000196642 | RABL6        |
| NR4A3_Medium | chr9    | 137900850 | 137901250 | Promoter (8-9kb)  | 9       | 137867925 | 137892570 | -8280         | ENSG00000203987 | LOC100133077 |
| NR4A3_Medium | chr10   | 81156     | 81556     | Promoter (6-7kb)  | 10      | 46892     | 74163     | -6993         | ENSG00000261456 | TUBB8        |
| NR4A3_Medium | chr10   | 336669    | 337069    | Promoter (7-8kb)  | 10      | 324639    | 329526    | -7143         | ENSG00000151240 | DIP2C        |
| NR4A3_Medium | chr10   | 1011036   | 1011436   | Promoter (<=1kb)  | 10      | 1012400   | 1017197   | -964          | ENSG00000107937 | GTPBP4       |
| NR4A3_Medium | chr10   | 1179952   | 1180352   | Promoter (6-7kb)  | 10      | 1182845   | 1186566   | 6214          | ENSG00000185736 | ADARB2       |
| NR4A3_Medium | chr10   | 1209013   | 1209413   | Promoter (8-9kb)  | 10      | 1183151   | 1200385   | -8628         | ENSG00000185736 | ADARB2       |
| NR4A3_Medium | chr10   | 5497283   | 5497683   | Promoter (1-2kb)  | 10      | 5498697   | 5499570   | 1887          | ENSG00000178372 | CALML5       |
| NR4A3_Medium | chr10   | 5497747   | 5498147   | Promoter (1-2kb)  | 10      | 5498697   | 5499570   | 1423          | ENSG00000178372 | CALML5       |
| NR4A3_Medium | chr10   | 14926377  | 14926777  | Promoter (1-2kb)  | 10      | 14919796  | 14928062  | 1285          | ENSG00000152457 | DCLRE1C      |
| NR4A3_Medium | chr10   | 15149273  | 15149673  | Promoter (5-6kb)  | 10      | 15154802  | 15155320  | 5647          | ENSG00000206448 | PPIAP30      |
| NR4A3_Medium | chr10   | 29695668  | 29696068  | Promoter (9-10kb) | 10      | 29657870  | 29686640  | -9028         | ENSG00000197321 | SVIL         |
| NR4A3_Medium | chr10   | 37601125  | 37601525  | Promoter (1-2kb)  | 10      | 37601440  | 37602974  | 1449          | ENSG00000256892 | MTRNR2L7     |
| NR4A3_Medium | chr10   | 46298299  | 46298699  | Promoter (<=1kb)  | 10      | 46297404  | 46310499  | 895           | ENSG00000274209 | ANTXRL       |
| NR4A3_Medium | chr10   | 48809215  | 48809615  | Promoter (6-7kb)  | 10      | 48802738  | 48824169  | 6477          | ENSG00000128815 | WDFY4        |
| NR4A3_Medium | chr10   | 49403333  | 49403733  | Promoter (7-8kb)  | 10      | 49366116  | 49396016  | -7317         | ENSG00000165606 | DRGX         |
| NR4A3_Medium | chr10   | 49741809  | 49742209  | Promoter (2-3kb)  | 10      | 49734646  | 49739499  | -2310         | ENSG00000197444 | OGDHL        |
| NR4A3_Medium | chr10   | 79503105  | 79503505  | Promoter (7-8kb)  | 10      | 79507694  | 79510560  | 7055          | ENSG00000235705 | LOC729815    |
| NR4A3_Medium | chr10   | 80658178  | 80658578  | Promoter (8-9kb)  | 10      | 80649797  | 80653732  | 8381          | ENSG00000231082 | LINC02655    |
| NR4A3_Medium | chr10   | 84186421  | 84186821  | Promoter (7-8kb)  | 10      | 84194537  | 84218694  | -7716         | ENSG00000148600 | CDHR1        |
| NR4A3_Medium | chr10   | 86653794  | 86654194  | Promoter (<=1kb)  | 10      | 86654547  | 86666460  | -353          | ENSG00000122375 | OPN4         |
| NR4A3_Medium | chr10   | 86654198  | 86654598  | Promoter (<=1kb)  | 10      | 86654547  | 86666460  | 0             | ENSG00000122375 | OPN4         |
| NR4A3_Medium | chr10   | 86961492  | 86961892  | Promoter (2-3kb)  | 10      | 86959375  | 86963258  | 2117          | ENSG00000173267 | SNCG         |
| NR4A3_Medium | chr10   | 97186103  | 97186503  | Promoter (<=1kb)  | 10      | 96998038  | 97185959  | -144          | ENSG00000187122 | SLIT1        |
| NR4A3_Medium | chr10   | 100057352 | 100057752 | Promoter (7-8kb)  | 10      | 100048767 | 100065394 | 7642          | ENSG00000120054 | CPN1         |
| NR4A3_Medium | chr10   | 103250846 | 103251246 | Promoter (4-5kb)  | 10      | 103245887 | 103248016 | 4959          | ENSG00000235376 | RPEL1        |
| NR4A3_Medium | chr10   | 110816237 | 110816637 | Promoter (6-7kb)  | 10      | 110823588 | 110831513 | -6951         | ENSG00000203867 | RBM20        |
| NR4A3_Medium | chr10   | 116628366 | 116628766 | Promoter (7-8kb)  | 10      | 116621306 | 116645143 | 7060          | ENSG00000266200 | PNLIPRP2     |
| NR4A3_Medium | chr10   | 122561693 | 122562093 | Promoter (<=1kb)  | 10      | 122560771 | 122643736 | 922           | ENSG00000187908 | DMBT1        |
| NR4A3_Medium | chr10   | 122725069 | 122725469 | Promoter (3-4kb)  | 10      | 122729429 | 122826448 | -3960         | ENSG00000176584 | DMBT1L1      |
| NR4A3_Medium | chr10   | 123935742 | 123936255 | Promoter (4-5kb)  | 10      | 123706207 | 123940267 | 4012          | ENSG00000121898 | CPXM2        |
| NR4A3_Medium | chr10   | 127739715 | 127740115 | Promoter (2-3kb)  | 10      | 127737185 | 127741183 | 2530          | ENSG00000186766 | FOXI2        |
| NR4A3_Medium | chr10   | 132364276 | 132364696 | Promoter (<=1kb)  | 10      | 132365471 | 132367001 | -775          | ENSG00000148814 | LRRC27       |
| NR4A3_Medium | chr10   | 132821843 | 132822243 | Promoter (9-10kb) | 10      | 132808443 | 132812804 | -9039         | ENSG00000171811 | CFAP46       |
| NR4A3_Medium | chr10   | 132912317 | 132912717 | Promoter (2-3kb)  | 10      | 132908348 | 132910096 | -2221         | ENSG00000171811 | CFAP46       |
| NR4A3_Medium | chr10   | 133455046 | 133455446 | Promoter (<=1kb)  | 10      | 133456237 | 133523558 | -791          | ENSG00000214279 | SCART1       |
| NR4A3_Medium | chr10   | 133536654 | 133537054 | Promoter (<=1kb)  | 10      | 133537500 | 133539118 | -446          | ENSG00000130649 | CYP2E1       |
| NR4A3_Medium | chr11   | 359882    | 360282    | Promoter (9-10kb) | 11      | 369499    | 382117    | -9217         | ENSG00000182272 | B4GALNT4     |
| NR4A3_Medium | chr11   | 362875    | 363275    | Promoter (6-7kb)  | 11      | 369499    | 382117    | -6224         | ENSG00000182272 | B4GALNT4     |
| NR4A3_Medium | chr11   | 1408612   | 1409012   | Promoter (<=1kb)  | 11      | 1409400   | 1442516   | -388          | ENSG00000174672 | BRSK2        |
| NR4A3_Medium | chr11   | 1742704   | 1743104   | Promoter (5-6kb)  | 11      | 1735213   | 1749102   | 5998          | ENSG00000244242 | IFITM10      |
| NR4A3_Medium | chr11   | 1754292   | 1754692   | Promoter (<=1kb)  | 11      | 1753383   | 1754946   | 254           | ENSG00000117984 | CTSD         |
| NR4A3_Medium | chr11   | 2125849   | 2126249   | Promoter (7-8kb)  | 11      | 2134134   | 2134209   | 7960          | ENSG00000207805 | MIR483       |
| NR4A3_Medium | chr11   | 3131731   | 3132131   | Promoter (2-3kb)  | 11      | 3122026   | 3129329   | -2402         | ENSG0000021762  | OSBPL5       |
| NR4A3_Medium | chr11   | 17769218  | 17769618  | Promoter (2-3kb)  | 11      | 17771938  | 17853730  | -2320         | ENSG00000129159 | KCNC1        |
| NR4A3_Medium | chr11   | 32885274  | 32885674  | Promoter (7-8kb)  | 11      | 32892820  | 32980266  | -7146         | ENSG00000060749 | QSER1        |
| NR4A3_Medium | chr11   | 44941838  | 44942576  | Promoter (<=1kb)  | 11      | 44936843  | 44943191  | 615           | ENSG00000175274 | TP5311       |
| NR4A3_Medium | chr11   | 44978388  | 44978788  | Promoter (4-5kb)  | 11      | 44974143  | 44974905  | 4245          | ENSG00000254654 | LINC02685    |
| NR4A3_Medium | chr11   | 61496816  | 61497216  | Promoter (7-8kb)  | 11      | 61489038  | 61490927  | 7778          | ENSG00000162148 | PPP1R32      |
| NR4A3_Medium | chr11   | 62237551  | 62237951  | Promoter (4-5kb)  | 11      | 62242239  | 62244812  | -4288         | ENSG00000124935 | SCGB1D2      |
| NR4A3_Medium | chr11   | 63980176  | 63980576  | Promoter (5-6kb)  | 11      | 63985853  | 63998411  | -5277         | ENSG00000167770 | OTUB1        |
| NR4A3_Medium | chr11   | 65200635  | 65201035  | Promoter (2-3kb)  | 11      | 65203372  | 65206669  | -2337         | ENSG00000014216 | CAPN1        |
| NR4A3_Medium | chr11   | 66262749  | 66263149  | Promoter (<=1kb)  | 11      | 66261930  | 66263062  | 819           | ENSG00000174996 | KLC2         |
| NR4A3_Medium | chr11   | 67668387  | 67668787  | Promoter (<=1kb)  | 11      | 67666157  | 67667970  | -417          | ENSG00000132746 | ALDH3B2      |
| NR4A3_Medium | chr11   | 67668892  | 67669292  | Promoter (<=1kb)  | 11      | 67666157  | 67667970  | -922          | ENSG00000132746 | ALDH3B2      |
| NR4A3_Medium | chr11   | 68816616  | 68817016  | Promoter (1-2kb)  | 11      | 68757613  | 68815503  | -1113         | ENSG00000110090 | CPT1A        |
| NR4A3_Medium | chr11   | 68930644  | 68931044  | Promoter (<=1kb)  | 11      | 68930091  | 68933398  | 553           | ENSG00000132740 | IGHMBP2      |
| NR4A3_Medium | chr11   | 69016275  | 69016675  | Promoter (2-3kb)  | 11      | 69004395  | 69013382  | -2893         | ENSG00000172935 | MRGPRF       |
| NR4A3_Medium | chr11   | 69291382  | 69291782  | Promoter (2-3kb)  | 11      | 69294151  | 69341682  | -2369         | ENSG00000172927 | MYEOV        |
| NR4A3_Medium | chr11   | 69813559  | 69813959  | Promoter (3-4kb)  | 11      | 69809990  | 69817550  | 3591          | ENSG00000186895 | FGF3         |
| NR4A3_Medium | chr11   | 70616767  | 70617167  | Promoter (9-10kb) | 11      | 70626441  | 7         |               |                 |              |

| Condition    | peakChr | peakStart | peakEnd   | annotation        | geneChr | geneStart | geneEnd   | distanceToTSS | geneID          | geneSymbol   |
|--------------|---------|-----------|-----------|-------------------|---------|-----------|-----------|---------------|-----------------|--------------|
| NR4A3_Medium | chr12   | 103905721 | 103906121 | Promoter (<=1kb)  | 12      | 103892994 | 103906272 | 151           | ENSG00000214198 | TTC41P       |
| NR4A3_Medium | chr12   | 109808801 | 109809201 | Promoter (5-6kb)  | 12      | 109783621 | 109814796 | 5595          | ENSG00000111199 | TRPV4        |
| NR4A3_Medium | chr12   | 111297099 | 111297499 | Promoter (6-7kb)  | 12      | 111304142 | 111304209 | -6643         | ENSG00000273700 | MIR6760      |
| NR4A3_Medium | chr12   | 112574554 | 112574954 | Promoter (<=1kb)  | 12      | 112575027 | 112865465 | -73           | ENSG00000089169 | RPH3A        |
| NR4A3_Medium | chr12   | 116839730 | 116840130 | Promoter (3-4kb)  | 12      | 116835997 | 116852945 | 3733          | ENSG00000135119 | RNFT2        |
| NR4A3_Medium | chr12   | 120994602 | 120995002 | Promoter (1-2kb)  | 12      | 120996390 | 120997882 | -1388         | ENSG00000135100 | HNF1A        |
| NR4A3_Medium | chr12   | 121811110 | 121811510 | Promoter (6-7kb)  | 12      | 121804738 | 121830239 | 6372          | ENSG00000139718 | SETD1B       |
| NR4A3_Medium | chr12   | 123511487 | 123511887 | Promoter (2-3kb)  | 12      | 123472068 | 123514428 | 2541          | ENSG00000188026 | RILPL1       |
| NR4A3_Medium | chr12   | 124362370 | 124362770 | Promoter (5-6kb)  | 12      | 124354837 | 124356850 | -5520         | ENSG00000196498 | NCOR2        |
| NR4A3_Medium | chr13   | 18903869  | 18904269  | Promoter (1-2kb)  | 13      | 18905419  | 18908443  | -1150         | ENSG00000226250 | LINC00408    |
| NR4A3_Medium | chr13   | 57140473  | 57140873  | Promoter (<=1kb)  | 13      | 57140918  | 57143939  | -45           | ENSG00000234278 | PRR20E       |
| NR4A3_Medium | chr13   | 110043246 | 110043782 | Promoter (9-10kb) | 13      | 110053285 | 110054952 | -9503         | ENSG00000231428 | LINC00396    |
| NR4A3_Medium | chr13   | 111590334 | 111590734 | Promoter (5-6kb)  | 13      | 111596009 | 111642079 | -5275         | ENSG00000215881 | LINC02337    |
| NR4A3_Medium | chr13   | 112872837 | 112873377 | Promoter (<=1kb)  | 13      | 112873432 | 112876094 | -55           | ENSG00000068650 | ATP11A       |
| NR4A3_Medium | chr13   | 113030949 | 113031349 | Promoter (6-7kb)  | 13      | 113024698 | 113052753 | 6251          | ENSG00000126217 | MCF2L        |
| NR4A3_Medium | chr13   | 113056229 | 113056747 | Promoter (7-8kb)  | 13      | 113064312 | 113070394 | -7565         | ENSG00000126217 | MCF2L        |
| NR4A3_Medium | chr13   | 113588724 | 113589124 | Promoter (3-4kb)  | 13      | 113585426 | 113633287 | 3298          | ENSG00000198176 | TFDP1        |
| NR4A3_Medium | chr13   | 113774488 | 113774888 | Promoter (6-7kb)  | 13      | 113768136 | 113799857 | 6352          | ENSG00000184497 | TMEM255B     |
| NR4A3_Medium | chr13   | 113796247 | 113796647 | Promoter (3-4kb)  | 13      | 113799888 | 113804890 | -3241         | ENSG00000184497 | TMEM255B     |
| NR4A3_Medium | chr13   | 113798400 | 113798800 | Promoter (1-2kb)  | 13      | 113799888 | 113804890 | -1088         | ENSG00000184497 | TMEM255B     |
| NR4A3_Medium | chr14   | 23402794  | 23403194  | Promoter (5-6kb)  | 14      | 23381982  | 23408273  | 5079          | ENSG00000197616 | MYH6         |
| NR4A3_Medium | chr14   | 32484578  | 32484978  | Promoter (9-10kb) | 14      | 32494271  | 32545455  | -9293         | ENSG00000151320 | AKAP6        |
| NR4A3_Medium | chr14   | 64211002  | 64211402  | Promoter (1-2kb)  | 14      | 64209608  | 64212866  | 1394          | ENSG00000054654 | SYNE2        |
| NR4A3_Medium | chr14   | 64765894  | 64766294  | Promoter (1-2kb)  | 14      | 64767324  | 64768213  | 1919          | ENSG00000070182 | SPTB         |
| NR4A3_Medium | chr14   | 68898881  | 68899281  | Promoter (8-9kb)  | 14      | 68879046  | 68890142  | -8739         | ENSG00000072110 | ACTN1        |
| NR4A3_Medium | chr14   | 89360628  | 89361028  | Promoter (9-10kb) | 14      | 89349533  | 89351321  | -9307         | ENSG00000053254 | FOXN3        |
| NR4A3_Medium | chr14   | 91112858  | 91113258  | Promoter (<=1kb)  | 14      | 91114063  | 91160369  | -805          | ENSG00000133943 | DGLUCY       |
| NR4A3_Medium | chr14   | 94590921  | 94591321  | Promoter (<=1kb)  | 14      | 94592058  | 94624646  | -737          | ENSG00000196136 | SERPINA3     |
| NR4A3_Medium | chr14   | 94651061  | 94651461  | Promoter (9-10kb) | 14      | 94641318  | 94645026  | 9743          | ENSG00000187483 | SERPINA13P   |
| NR4A3_Medium | chr14   | 100658158 | 100658558 | Promoter (<=1kb)  | 14      | 100657358 | 100667545 | 800           | ENSG00000196273 | LINC00523    |
| NR4A3_Medium | chr14   | 100779039 | 100779439 | Promoter (<=1kb)  | 14      | 100779410 | 100829185 | 0             | ENSG00000214548 | MEG3         |
| NR4A3_Medium | chr14   | 101038160 | 101038590 | Promoter (1-2kb)  | 14      | 101039690 | 101039755 | -1100         | ENSG00000283279 | MIR376C      |
| NR4A3_Medium | chr14   | 101555618 | 101556018 | Promoter (<=1kb)  | 14      | 101552223 | 101555676 | 0             | ENSG00000258498 | DIO3OS       |
| NR4A3_Medium | chr14   | 102498732 | 102499132 | Promoter (1-2kb)  | 14      | 102497539 | 102498412 | 1193          | ENSG00000196663 | TECPR2       |
| NR4A3_Medium | chr14   | 104859503 | 104859903 | Promoter (5-6kb)  | 14      | 104865268 | 104896747 | -5365         | ENSG00000099814 | CEP170B      |
| NR4A3_Medium | chr14   | 104890534 | 104890934 | Promoter (2-3kb)  | 14      | 104893934 | 104895059 | -3000         | ENSG00000099814 | CEP170B      |
| NR4A3_Medium | chr15   | 77699482  | 77699882  | Promoter (2-3kb)  | 15      | 77615722  | 77696495  | -2987         | ENSG00000169783 | LINGO1       |
| NR4A3_Medium | chr15   | 77810014  | 77810414  | Promoter (9-10kb) | 15      | 77615673  | 77819452  | 9038          | ENSG00000169783 | LINGO1       |
| NR4A3_Medium | chr15   | 78992874  | 78993274  | Promoter (4-5kb)  | 15      | 78991712  | 78998071  | 4797          | ENSG00000058335 | RASGRF1      |
| NR4A3_Medium | chr15   | 79092268  | 79092668  | Promoter (1-2kb)  | 15      | 78959947  | 79090773  | -1495         | ENSG00000058335 | RASGRF1      |
| NR4A3_Medium | chr15   | 88251554  | 88251954  | Promoter (<=1kb)  | 15      | 88137461  | 88252622  | 668           | ENSG00000140538 | NTRK3        |
| NR4A3_Medium | chr15   | 88900757  | 88901395  | Promoter (<=1kb)  | 15      | 88899298  | 88901960  | 565           | ENSG00000140545 | MFGE8        |
| NR4A3_Medium | chr15   | 89746107  | 89746507  | Promoter (4-5kb)  | 15      | 89749891  | 89751137  | 4630          | ENSG00000166823 | MESP1        |
| NR4A3_Medium | chr15   | 98000985  | 98001385  | Promoter (1-2kb)  | 15      | 98003038  | 98022009  | -1653         | ENSG00000258483 | LINC02251    |
| NR4A3_Medium | chr16   | 631943    | 632343    | Promoter (<=1kb)  | 16      | 630985    | 634117    | 958           | ENSG00000127578 | WFIKKN1      |
| NR4A3_Medium | chr16   | 882554    | 882954    | Promoter (4-5kb)  | 16      | 870833    | 887131    | 4177          | ENSG00000103227 | LMF1         |
| NR4A3_Medium | chr16   | 1307527   | 1307927   | Promoter (<=1kb)  | 16      | 1308880   | 1327018   | -953          | ENSG00000103275 | UBE2I        |
| NR4A3_Medium | chr16   | 6772422   | 6772822   | Promoter (<=1kb)  | 16      | 6773809   | 7710844   | -987          | ENSG00000078328 | RBFOX1       |
| NR4A3_Medium | chr16   | 10039956  | 10040356  | Promoter (8-9kb)  | 16      | 9938153   | 10031580  | -8376         | ENSG00000183454 | GRIN2A       |
| NR4A3_Medium | chr16   | 10859201  | 10859601  | Promoter (6-7kb)  | 16      | 10866222  | 10902104  | -6621         | ENSG00000179583 | CIITA        |
| NR4A3_Medium | chr16   | 23156005  | 23156405  | Promoter (6-7kb)  | 16      | 23061406  | 23149270  | -6735         | ENSG00000103404 | USP31        |
| NR4A3_Medium | chr16   | 31328480  | 31328880  | Promoter (<=1kb)  | 16      | 31329002  | 31330052  | -122          | ENSG00000169896 | ITGAM        |
| NR4A3_Medium | chr16   | 33337974  | 33338374  | Promoter (7-8kb)  | 16      | 33206431  | 33330342  | -7632         | NA              | LOC105369266 |
| NR4A3_Medium | chr16   | 46915617  | 46916017  | Promoter (<=1kb)  | 16      | 46915298  | 46929007  | 319           | ENSG00000166123 | GPT2         |
| NR4A3_Medium | chr16   | 49669386  | 49669786  | Promoter (5-6kb)  | 16      | 49490787  | 49664225  | -5161         | ENSG00000102935 | ZNF423       |
| NR4A3_Medium | chr16   | 53052954  | 53053354  | Promoter (<=1kb)  | 16      | 53035690  | 53052873  | -81           | ENSG00000277639 | LOC105371267 |
| NR4A3_Medium | chr16   | 57423006  | 57423406  | Promoter (7-8kb)  | 16      | 57429177  | 57430646  | 7240          | ENSG00000005194 | CIAPIN1      |
| NR4A3_Medium | chr16   | 57569205  | 57569605  | Promoter (5-6kb)  | 16      | 57574816  | 57591681  | -5211         | ENSG00000159618 | ADGRG5       |
| NR4A3_Medium | chr16   | 57705772  | 57706315  | Promoter (<=1kb)  | 16      | 57704907  | 57707861  | 865           | ENSG00000159625 | DRC7         |
| NR4A3_Medium | chr16   | 57706608  | 57707008  | Promoter (1-2kb)  | 16      | 57704907  | 57707861  | 1701          | ENSG00000159625 | DRC7         |
| NR4A3_Medium | chr16   | 81194415  | 81194815  | Promoter (3-4kb)  | 16      | 81170292  | 81198786  | 3971          | ENSG00000166473 | PKD1L2       |
| NR4A3_Medium | chr16   | 81615036  | 81615475  | Promoter (3-4kb)  | 16      | 81611348  | 81611408  | 3688          | ENSG00000275109 | MIR6504      |
| NR4A3_Medium | chr16   | 86587674  | 86588074  | Promoter (9-10kb) | 16      | 86578506  | 86582160  | 9168          | ENSG00000176678 | FOXL1        |
| NR4A3_Medium | chr16   | 87221950  | 87222350  | Promoter (9-10kb) | 16      | 87212122  | 87226430  | 9828          | ENSG00000261095 | LOC101928708 |
| NR4A3_Medium | chr16   | 87701679  | 87702079  | Promoter (6-7kb)  | 16      | 87703026  | 87708387  | 6308          | ENSG00000104731 | KLHDC4       |
| NR4A3_Medium | chr16   | 88192853  | 88193276  | Promoter (1-2kb)  | 16      | 88194281  | 88195217  | -1005         | ENSG00000260420 | LINC02182    |
| NR4A3_Medium | chr16   | 89278577  | 89278977  | Promoter (3-4kb)  | 16      | 89274735  | 89275118  | -3459         | ENSG00000167522 | ANKRD11      |
| NR4A3_Medium | chr16   | 89579479  | 89579879  | Promoter (3-4kb)  | 16      | 89575782  | 89583714  | 3697          | ENSG00000178773 | CPNE7        |
| NR4A3_Medium | chr17   | 6069309   | 6069709   | Promoter (<=1kb)  | 17      | 6069117   | 6120738   | 192           | ENSG00000179314 | WSCD1        |
| NR4A3_Medium | chr17   | 7175530   | 7175930   | Promoter (1-2kb)  | 17      | 7173558   | 7177046   | 1116          | ENSG00000141505 | ASGR1        |
| NR4A3_Medium | chr17   | 7192430   | 7192830   | Promoter (<=1kb)  | 17      | 7189890   | 7192235   | -195          | ENSG00000132535 | DLG4         |
| NR4A3_Medium | chr17   | 8185178   | 8185578   | Promoter (1-2kb)  | 17      | 8186945   | 8187004   | -1367         | ENSG00000283160 | MIR4521      |
| NR4A3_Medium | chr17   | 9816201   | 9816601   | Promoter (5-6kb)  | 17      | 9802386   | 9822071   | 5470          | ENSG00000214978 | GSGL2        |
| NR4A3_Medium | chr17   | 9816649   | 9817049   | Promoter (5-6kb)  | 17      | 9802386   | 9822071   | 5022          | ENSG00000214978 | GSGL2        |
| NR4A3_Medium | chr17   | 17772834  | 17773234  | Promoter (2-3kb)  | 17      | 17759154  | 17770821  | -2013         | ENSG00000237328 | RAI1-AS1     |
| NR4A3_Medium | chr17   | 21297687  | 21298087  | Promoter (6-7kb)  | 17      | 21291469  | 21314965  | 6218          | ENSG00000034152 | MAP2K3       |
| NR4A3_Medium | chr17   | 22401570  | 22401970  | Promoter (4-5kb)  | 17      | 22406019  | 22413744  | -4049         | ENSG00000276399 | FLJ36000     |
| NR4A3_Medium | chr17   | 22521258  | 22521699  | Promoter (1-2kb)  | 17      | 22523111  | 22524663  | -1412         | ENSG00000256618 | MTRNR2L1     |
| NR4A3_Medium | chr17   | 22522720  | 22523120  | Promoter (<=1kb)  | 17      | 22523111  | 22524663  | 0             | ENSG00000256618 | MTRNR2L1     |
| NR4A3_Medium | chr17   | 28708121  | 28708521  | Promoter (<=1kb)  | 17      | 28703714  | 28707884  | -237          | ENSG00000167525 | PROCA1       |
| NR4A3_Medium | chr17   | 28913031  | 28913431  | Promoter (<=1kb)  | 17      | 28910226  | 28913094  | 0             | ENSG00000109118 | PHF12        |
| NR4A3_Medium | chr17   | 75921293  | 75921693  | Promoter (1-2kb)  | 17      | 75920273  | 75923473  | 1780          | ENSG00000188878 | FBF1         |
| NR4A3_Medium | chr17   | 76840654  | 76841287  | Promoter (8-9kb)  | 17      | 76849840  | 76861836  | -8553         | ENSG00000267535 | LINC00868    |
| NR4A3_Medium | chr17   | 77484846  | 77485246  | Promoter (2-3kb)  | 17      | 77481913  | 77488788  | 2933          | ENSG00000184640 | SEPTIN9      |
| NR4A3_Medium | chr17   | 77509268  | 77509668  | Promoter (7-8kb)  | 17      | 77516887  | 77536592  | -7219         | ENSG00000267665 | LOC400622    |
| NR4A3_Medium | chr17   | 79498490  | 79498890  | Promoter (9-10kb) | 17      | 79094257  | 79508868  | 9978          | ENSG00000167281 | RBFOX3       |
| NR4A3_Medium | chr17   | 80281409  | 80281809  | Promoter (6-7kb)  | 17      | 80287959  | 80336900  | -6150         | ENSG00000173821 | RNF213       |
| NR4A3_Medium | chr17   | 81531241  | 81531641  | Promoter (2-3kb)  | 17      | 81528532  | 81537080  | 2709          | ENSG00000186765 | FSCN2        |
| NR4A3_Medium | chr17   | 81535162  | 81535562  | Promoter (<=1kb)  | 17      | 81536146  | 81536956  | -584          | ENSG00000186765 | FSCN2        |
| NR4A3_Medium | chr17   | 82586195  | 82586635  | Promoter (<=1kb)  | 17      | 82586130  | 82587562  | 65            | ENSG00000141568 | FOXK2        |
| NR4A3_Medium | chr18   | 107976    | 108404    | Promoter (<=1kb)  | 18      | 109065    | 122219    | -661          | ENSG00000263006 | ROCK1P1      |
| NR4A3_Medium | chr18   | 110212    | 110614    | Promoter (1-2kb)  | 18      | 109065    | 122219    | 1147          | ENSG00000263006 | ROCK1P1      |
| NR4A3_Medium | chr18   | 6953144   | 6953544   | Promoter (1-2kb)  | 18      | 6954677   | 6957419   | -1133         | ENSG00000265069 | LOC101927188 |
| NR4A3_Medium | chr18   | 10755     |           |                   |         |           |           |               |                 |              |



| Condition    | peakChr | peakStart | peakEnd  | annotation        | geneChr | geneStart | geneEnd  | distanceToTSS | geneID          | geneSymbol   |
|--------------|---------|-----------|----------|-------------------|---------|-----------|----------|---------------|-----------------|--------------|
| NR4A3_Medium | chr19   | 3529255   | 3529655  | Promoter (2-3kb)  | 19      | 3532483   | 3533748  | -2828         | ENSG00000105325 | FZR1         |
| NR4A3_Medium | chr19   | 3776483   | 3776883  | Promoter (4-5kb)  | 19      | 3769089   | 3772221  | -4262         | ENSG00000173976 | RAX2         |
| NR4A3_Medium | chr19   | 3923758   | 3924158  | Promoter (8-9kb)  | 19      | 3933103   | 3942414  | -8945         | ENSG00000077009 | NMRK2        |
| NR4A3_Medium | chr19   | 4035623   | 4036023  | Promoter (7-8kb)  | 19      | 4028461   | 4028814  | 7162          | ENSG00000105229 | PIAS4        |
| NR4A3_Medium | chr19   | 4227828   | 4228228  | Promoter (1-2kb)  | 19      | 4229523   | 4237528  | -1295         | ENSG00000105246 | EBI3         |
| NR4A3_Medium | chr19   | 4492522   | 4493236  | Promoter (3-4kb)  | 19      | 4496333   | 4502104  | -3097         | ENSG00000167674 | HDFGL2       |
| NR4A3_Medium | chr19   | 5019246   | 5019646  | Promoter (2-3kb)  | 19      | 5016325   | 5153105  | 2921          | ENSG00000127663 | KDM4B        |
| NR4A3_Medium | chr19   | 5567048   | 5567448  | Promoter (<=1kb)  | 19      | 5561632   | 5567831  | 383           | ENSG00000223573 | TINCR        |
| NR4A3_Medium | chr19   | 6008286   | 6008686  | Promoter (<=1kb)  | 19      | 6002722   | 6008226  | -60           | ENSG00000087903 | RFX2         |
| NR4A3_Medium | chr19   | 6131275   | 6131675  | Promoter (3-4kb)  | 19      | 6135247   | 6151797  | -3572         | ENSG00000130377 | ACSBG2       |
| NR4A3_Medium | chr19   | 6710260   | 6710660  | Promoter (<=1kb)  | 19      | 6709756   | 6710957  | 297           | ENSG00000125730 | C3           |
| NR4A3_Medium | chr19   | 6717422   | 6717822  | Promoter (2-3kb)  | 19      | 6677704   | 6720650  | 2828          | ENSG00000125730 | C3           |
| NR4A3_Medium | chr19   | 7616503   | 7616903  | Promoter (<=1kb)  | 19      | 7616406   | 7617431  | 97            | ENSG00000076826 | CAMSAP3      |
| NR4A3_Medium | chr19   | 8378865   | 8379265  | Promoter (1-2kb)  | 19      | 8374421   | 8377827  | -1038         | ENSG00000269386 | RAB11B-AS1   |
| NR4A3_Medium | chr19   | 10006852  | 10007252 | Promoter (3-4kb)  | 19      | 9959561   | 10010504 | 3252          | ENSG00000080573 | COL5A3       |
| NR4A3_Medium | chr19   | 10921633  | 10922033 | Promoter (<=1kb)  | 19      | 10920667  | 10921934 | 966           | ENSG00000142453 | CARM1        |
| NR4A3_Medium | chr19   | 11222095  | 11222495 | Promoter (<=1kb)  | 19      | 11221986  | 11222324 | 0             | ENSG00000130158 | DOCK6        |
| NR4A3_Medium | chr19   | 12048740  | 12049140 | Promoter (3-4kb)  | 19      | 12043805  | 12052961 | 3821          | ENSG00000257446 | ZNF878       |
| NR4A3_Medium | chr19   | 12989313  | 12989713 | Promoter (5-6kb)  | 19      | 12995608  | 13096201 | -5895         | ENSG00000008441 | NFIX         |
| NR4A3_Medium | chr19   | 12990949  | 12991349 | Promoter (4-5kb)  | 19      | 12995608  | 13096201 | -4259         | ENSG00000008441 | NFIX         |
| NR4A3_Medium | chr19   | 15650577  | 15650977 | Promoter (<=1kb)  | 19      | 15649980  | 15658316 | 597           | ENSG00000186529 | CYP4F3       |
| NR4A3_Medium | chr19   | 15812439  | 15812839 | Promoter (4-5kb)  | 19      | 15807003  | 15808126 | -4313         | ENSG00000186723 | OR10H1       |
| NR4A3_Medium | chr19   | 16069151  | 16069551 | Promoter (1-2kb)  | 19      | 16067733  | 16102875 | 1418          | ENSG00000167460 | TPM4         |
| NR4A3_Medium | chr19   | 18347191  | 18347591 | Promoter (6-7kb)  | 19      | 18340639  | 18363688 | 6552          | ENSG00000130517 | PGPEP1       |
| NR4A3_Medium | chr19   | 18441979  | 18442379 | Promoter (3-4kb)  | 19      | 18444516  | 18445399 | 3020          | ENSG00000105656 | ELL          |
| NR4A3_Medium | chr19   | 19207472  | 19207872 | Promoter (4-5kb)  | 19      | 19201416  | 19203424 | -4048         | ENSG00000184162 | NR2C2AP      |
| NR4A3_Medium | chr19   | 19262366  | 19262766 | Promoter (<=1kb)  | 19      | 19254756  | 19262804 | 38            | ENSG00000187664 | HAPLN4       |
| NR4A3_Medium | chr19   | 19621890  | 19622290 | Promoter (3-4kb)  | 19      | 19561707  | 19618693 | -3197         | ENSG00000105717 | PBX4         |
| NR4A3_Medium | chr19   | 33505690  | 33506090 | Promoter (5-6kb)  | 19      | 33462951  | 33511138 | 5048          | ENSG00000124299 | PEPD         |
| NR4A3_Medium | chr19   | 33506491  | 33506891 | Promoter (4-5kb)  | 19      | 33462951  | 33511138 | 4247          | ENSG00000124299 | PEPD         |
| NR4A3_Medium | chr19   | 35297121  | 35297521 | Promoter (4-5kb)  | 19      | 35292161  | 35313807 | 4960          | ENSG00000105695 | MAG          |
| NR4A3_Medium | chr19   | 35805634  | 35806034 | Promoter (<=1kb)  | 19      | 35801793  | 35806446 | 412           | ENSG00000250799 | PRODH2       |
| NR4A3_Medium | chr19   | 37303249  | 37303649 | Promoter (<=1kb)  | 19      | 37235507  | 37304340 | 691           | NA              | LOC284412    |
| NR4A3_Medium | chr19   | 45341010  | 45341410 | Promoter (<=1kb)  | 19      | 45340774  | 45348892 | 236           | ENSG00000104892 | KLC3         |
| NR4A3_Medium | chr19   | 47405938  | 47406338 | Promoter (2-3kb)  | 19      | 47407098  | 47409152 | 2814          | ENSG00000105419 | MEIS3        |
| NR4A3_Medium | chr19   | 47422931  | 47423331 | Promoter (3-4kb)  | 19      | 47403124  | 47419527 | -3404         | ENSG00000105419 | MEIS3        |
| NR4A3_Medium | chr19   | 47671710  | 47672110 | Promoter (6-7kb)  | 19      | 47678962  | 47703222 | -6852         | ENSG00000063169 | BICRA        |
| NR4A3_Medium | chr19   | 50498573  | 50498973 | Promoter (9-10kb) | 19      | 50506446  | 50508029 | 9032          | ENSG00000161677 | JOSD2        |
| NR4A3_Medium | chr19   | 50552543  | 50552943 | Promoter (1-2kb)  | 19      | 50516892  | 50551042 | -1501         | ENSG00000131409 | LRRC4B       |
| NR4A3_Medium | chr19   | 50626334  | 50626734 | Promoter (<=1kb)  | 19      | 50622420  | 50626134 | -200          | ENSG00000213023 | SYT3         |
| NR4A3_Medium | chr19   | 50978590  | 50978990 | Promoter (4-5kb)  | 19      | 50976488  | 50983815 | 4825          | ENSG00000169035 | KLK7         |
| NR4A3_Medium | chr19   | 52298528  | 52298928 | Promoter (1-2kb)  | 19      | 52297179  | 52323680 | 1349          | ENSG00000198464 | ZNF480       |
| NR4A3_Medium | chr19   | 55450509  | 55450909 | Promoter (7-8kb)  | 19      | 55428740  | 55442863 | -7646         | ENSG00000187902 | SHISA7       |
| NR4A3_Medium | chr19   | 55542519  | 55542919 | Promoter (2-3kb)  | 19      | 55544248  | 55545522 | 2603          | ENSG00000231274 | SBK3         |
| NR4A3_Medium | chr19   | 56149107  | 56149507 | Promoter (3-4kb)  | 19      | 56146088  | 56147142 | 3019          | ENSG00000167685 | ZNF444       |
| NR4A3_Medium | chr19   | 56158891  | 56159291 | Promoter (1-2kb)  | 19      | 56157309  | 56159967 | 1582          | ENSG00000167685 | ZNF444       |
| NR4A3_Medium | chr19   | 58411883  | 58412283 | Promoter (3-4kb)  | 19      | 58408777  | 58417091 | 3106          | ENSG00000171574 | ZNF584       |
| NR4A3_Medium | chr20   | 29407713  | 29408113 | Promoter (8-9kb)  | 20      | 29415264  | 29416911 | 8798          | NA              | FRG2EP       |
| NR4A3_Medium | chr20   | 30283713  | 30284113 | Promoter (5-6kb)  | 20      | 30278906  | 30289205 | 5092          | NA              | LINC01597    |
| NR4A3_Medium | chr20   | 30412789  | 30413189 | Promoter (9-10kb) | 20      | 30403123  | 30403384 | -9405         | NA              | MLLT10P1     |
| NR4A3_Medium | chr20   | 32180583  | 32180983 | Promoter (9-10kb) | 20      | 32186477  | 32190360 | 9377          | ENSG00000235217 | TSPY26P      |
| NR4A3_Medium | chr20   | 33305023  | 33305423 | Promoter (6-7kb)  | 20      | 33298713  | 33307966 | 6310          | ENSG00000125999 | BPIFB1       |
| NR4A3_Medium | chr20   | 44404807  | 44405207 | Promoter (2-3kb)  | 20      | 44408120  | 44408203 | -2913         | ENSG00000266151 | MIR3646      |
| NR4A3_Medium | chr20   | 46522595  | 46522995 | Promoter (9-10kb) | 20      | 46501062  | 46513559 | -9036         | ENSG00000198185 | ZNF334       |
| NR4A3_Medium | chr20   | 57360437  | 57360837 | Promoter (<=1kb)  | 20      | 57358447  | 57359498 | -939          | ENSG00000256222 | MTRNR2L3     |
| NR4A3_Medium | chr20   | 58694904  | 58695304 | Promoter (<=1kb)  | 20      | 58694421  | 58713580 | 483           | ENSG00000254995 | STX16-NPEPL1 |
| NR4A3_Medium | chr20   | 58830382  | 58830782 | Promoter (8-9kb)  | 20      | 58839718  | 58911192 | -8936         | ENSG00000087460 | GNAS         |
| NR4A3_Medium | chr20   | 59584140  | 59584540 | Promoter (6-7kb)  | 20      | 59577509  | 59847711 | 6631          | ENSG00000087495 | PHACTR3      |
| NR4A3_Medium | chr20   | 59604539  | 59604939 | Promoter (<=1kb)  | 20      | 59604540  | 59847711 | 0             | ENSG00000087495 | PHACTR3      |
| NR4A3_Medium | chr20   | 60314526  | 60314926 | Promoter (6-7kb)  | 20      | 60308474  | 60308567 | 6052          | ENSG00000207802 | MIR646       |
| NR4A3_Medium | chr20   | 61565062  | 61565462 | Promoter (4-5kb)  | 20      | 61570135  | 61937218 | -4673         | ENSG00000179242 | CDH4         |
| NR4A3_Medium | chr20   | 61726521  | 61726921 | Promoter (6-7kb)  | 20      | 61717506  | 61719748 | -6773         | ENSG00000179253 | LOC100128310 |
| NR4A3_Medium | chr20   | 62054774  | 62055174 | Promoter (9-10kb) | 20      | 62012874  | 62064366 | 9192          | ENSG00000130699 | TAF4         |
| NR4A3_Medium | chr20   | 62169570  | 62169970 | Promoter (6-7kb)  | 20      | 62163458  | 62180284 | 6112          | ENSG00000184402 | SS18L1       |
| NR4A3_Medium | chr20   | 62270797  | 62271197 | Promoter (2-3kb)  | 20      | 62273309  | 62282093 | -2112         | ENSG00000130703 | OSBPL2       |
| NR4A3_Medium | chr20   | 62397950  | 62398350 | Promoter (1-2kb)  | 20      | 62391014  | 62396331 | -1619         | ENSG00000149679 | CABLES2      |
| NR4A3_Medium | chr20   | 63257384  | 63257784 | Promoter (2-3kb)  | 20      | 63240784  | 63254463 | -2921         | ENSG00000101198 | NKAIN4       |
| NR4A3_Medium | chr20   | 63492259  | 63492722 | Promoter (5-6kb)  | 20      | 63490081  | 63498748 | 5976          | ENSG00000101210 | EEF1A2       |
| NR4A3_Medium | chr21   | 8219761   | 8220221  | Promoter (7-8kb)  | 21      | 8212572   | 8212724  | 7189          | ENSG00000276700 | RNA5-8SN4    |
| NR4A3_Medium | chr21   | 36539282  | 36539682 | Promoter (2-3kb)  | 21      | 36460621  | 36542600 | 2918          | ENSG00000159261 | CLDN14       |
| NR4A3_Medium | chr21   | 41179229  | 41179629 | Promoter (1-2kb)  | 21      | 41175231  | 41180818 | 1189          | ENSG00000280109 | PLAC4        |
| NR4A3_Medium | chr21   | 41829779  | 41830179 | Promoter (5-6kb)  | 21      | 41821191  | 41835518 | 5339          | ENSG00000141956 | PRDM15       |
| NR4A3_Medium | chr21   | 41915301  | 41915701 | Promoter (3-4kb)  | 21      | 41886673  | 41919033 | 3332          | ENSG00000157617 | C2CD2        |
| NR4A3_Medium | chr21   | 42410807  | 42411207 | Promoter (6-7kb)  | 21      | 42403917  | 42447530 | 6890          | ENSG00000160185 | UBASH3A      |
| NR4A3_Medium | chr21   | 42691293  | 42691693 | Promoter (5-6kb)  | 21      | 42686197  | 42762139 | 5096          | ENSG00000160191 | PDE9A        |
| NR4A3_Medium | chr21   | 42759391  | 42759791 | Promoter (2-3kb)  | 21      | 42762214  | 42768412 | -2423         | ENSG00000160191 | PDE9A        |
| NR4A3_Medium | chr21   | 44523685  | 44524085 | Promoter (6-7kb)  | 21      | 44517620  | 44525952 | 6065          | NA              | TSPEAR-AS2   |
| NR4A3_Medium | chr21   | 44539432  | 44539832 | Promoter (<=1kb)  | 21      | 44538981  | 44540195 | 363           | ENSG00000215455 | KRTAP10-1    |
| NR4A3_Medium | chr21   | 45529817  | 45530217 | Promoter (1-2kb)  | 21      | 45493572  | 45531541 | 1324          | ENSG00000173638 | SLC19A1      |
| NR4A3_Medium | chr21   | 45636211  | 45636611 | Promoter (7-8kb)  | 21      | 45643694  | 45788739 | -7083         | ENSG00000183570 | PCBP3        |
| NR4A3_Medium | chr21   | 46090838  | 46091238 | Promoter (6-7kb)  | 21      | 46098097  | 46132849 | -6859         | ENSG00000142173 | COL6A2       |
| NR4A3_Medium | chr21   | 46123697  | 46124136 | Promoter (3-4kb)  | 21      | 46120560  | 46125894 | 3137          | ENSG00000142173 | COL6A2       |
| NR4A3_Medium | chr22   | 17580994  | 17581394 | Promoter (6-7kb)  | 22      | 17580314  | 17588018 | 6624          | NA              | LOC101929372 |
| NR4A3_Medium | chr22   | 19909670  | 19910070 | Promoter (5-6kb)  | 22      | 19895016  | 19915789 | 5719          | ENSG00000184470 | TXNRD2       |
| NR4A3_Medium | chr22   | 19993921  | 19994321 | Promoter (3-4kb)  | 22      | 19971228  | 19990794 | -3127         | ENSG00000099889 | ARVCF        |
| NR4A3_Medium | chr22   | 20199473  | 20199873 | Promoter (5-6kb)  | 22      | 20198729  | 20204918 | 5045          | ENSG00000249923 | LINC02891    |
| NR4A3_Medium | chr22   | 26160007  | 26160407 | Promoter (9-10kb) | 22      | 26169462  | 26383596 | -9055         | ENSG00000100095 | SEZ6L        |
| NR4A3_Medium | chr22   | 27298850  | 27299250 | Promoter (8-9kb)  | 22      | 27307802  | 27317456 | -8552         | ENSG00000226741 | LINC02554    |
| NR4A3_Medium | chr22   | 29509288  | 29509688 | Promoter (1-2kb)  | 22      | 29508329  | 29511442 | 1754          | ENSG00000100296 | THOC5        |
| NR4A3_Medium | chr22   | 38761749  | 38762149 | Promoter (5-6kb)  | 22      | 38745687  | 38756000 | -5749         | ENSG00000100242 | SUN2         |
| NR4A3_Medium | chr22   | 39563626  | 39564026 | Promoter (6-7kb)  | 22      | 39570753  | 39684528 | -6727         | ENSG00000100346 | CACNA11      |
| NR4A3_Medium | chr22   | 39565890  | 39566290 | Promoter (4-5kb)  | 22      | 39570753  | 39684528 | -4463         | ENSG00000100346 | CACNA11      |
| NR4A3_Medium | chr22   | 42336302  | 42336702 | Promoter (6-7kb)  | 22      | 42214847  | 42343616 | 6914          | ENSG00000100207 | TCF20        |
| NR4A3_Medium | chr22   | 44633574  | 44633974 | Promoter (8-9kb)  | 22      | 44606939  | 44625419 | -8155         | NA              | LINC00229    |
| NR4A3_Medium | chr22   | 46372191  | 46372591 | Promoter (5-6kb)  | 22      | 46372913  | 46377624 | 5033          |                 |              |

| Condition  | peakChr | peakStart | peakEnd   | annotation        | geneChr | geneStart | geneEnd   | distanceToTSS | geneID          | geneSymbol   |
|------------|---------|-----------|-----------|-------------------|---------|-----------|-----------|---------------|-----------------|--------------|
| NR4A3_R848 | chr1    | 2149564   | 2149964   | Promoter (4-5kb)  | 1       | 2145387   | 2185116   | 4177          | ENSG00000067606 | PRKCZ        |
| NR4A3_R848 | chr1    | 3016295   | 3016695   | Promoter (4-5kb)  | 1       | 3021467   | 3022903   | -4772         | ENSG00000169717 | ACTRT2       |
| NR4A3_R848 | chr1    | 3025885   | 3026425   | Promoter (4-5kb)  | 1       | 3021467   | 3022903   | 4418          | ENSG00000169717 | ACTRT2       |
| NR4A3_R848 | chr1    | 3422085   | 3422485   | Promoter (2-3kb)  | 1       | 3424919   | 3434095   | -2434         | ENSG00000142611 | PRDM16       |
| NR4A3_R848 | chr1    | 3470514   | 3470914   | Promoter (<=1kb)  | 1       | 3471607   | 3474457   | -693          | ENSG00000130762 | ARHGEF16     |
| NR4A3_R848 | chr1    | 3676079   | 3676479   | Promoter (5-6kb)  | 1       | 3682366   | 3733079   | -5887         | ENSG00000078900 | TP73         |
| NR4A3_R848 | chr1    | 3738895   | 3739295   | Promoter (3-4kb)  | 1       | 3738075   | 3742858   | 3563          | ENSG00000227372 | TP73-AS1     |
| NR4A3_R848 | chr1    | 4647172   | 4647572   | Promoter (7-8kb)  | 1       | 4654609   | 4792534   | -7037         | ENSG00000196581 | AJAP1        |
| NR4A3_R848 | chr1    | 5869130   | 5869530   | Promoter (<=1kb)  | 1       | 5862811   | 5868375   | -755          | ENSG00000131697 | NPHP4        |
| NR4A3_R848 | chr1    | 5882440   | 5882840   | Promoter (<=1kb)  | 1       | 5876879   | 5882849   | 9             | ENSG00000131697 | NPHP4        |
| NR4A3_R848 | chr1    | 6106860   | 6107260   | Promoter (<=1kb)  | 1       | 6105081   | 6106772   | -88           | ENSG00000116254 | CHD5         |
| NR4A3_R848 | chr1    | 6107852   | 6108252   | Promoter (1-2kb)  | 1       | 6105081   | 6106772   | -1080         | ENSG00000116254 | CHD5         |
| NR4A3_R848 | chr1    | 6174754   | 6175154   | Promoter (4-5kb)  | 1       | 6105091   | 6180023   | 4869          | ENSG00000116254 | CHD5         |
| NR4A3_R848 | chr1    | 8361313   | 8361713   | Promoter (1-2kb)  | 1       | 8355521   | 8362844   | 1131          | ENSG00000142599 | RERE         |
| NR4A3_R848 | chr1    | 9359289   | 9359689   | Promoter (3-4kb)  | 1       | 9355707   | 9367575   | 3582          | ENSG00000171621 | SPSB1        |
| NR4A3_R848 | chr1    | 10708726  | 10709126  | Promoter (3-4kb)  | 1       | 10704196  | 10705575  | -3151         | ENSG00000130940 | CASZ1        |
| NR4A3_R848 | chr1    | 11040767  | 11041167  | Promoter (2-3kb)  | 1       | 11037693  | 11043198  | 2031          | ENSG00000009724 | MASP2        |
| NR4A3_R848 | chr1    | 11041326  | 11041726  | Promoter (1-2kb)  | 1       | 11037693  | 11043198  | 1472          | ENSG00000009724 | MASP2        |
| NR4A3_R848 | chr1    | 11524493  | 11524893  | Promoter (8-9kb)  | 1       | 11533676  | 11537225  | -8783         | ENSG00000204624 | DISP3        |
| NR4A3_R848 | chr1    | 16132676  | 16133076  | Promoter (<=1kb)  | 1       | 16133013  | 16133562  | 486           | ENSG00000142627 | EPHA2        |
| NR4A3_R848 | chr1    | 16142931  | 16143331  | Promoter (3-4kb)  | 1       | 16134560  | 16146450  | 3119          | ENSG00000142627 | EPHA2        |
| NR4A3_R848 | chr1    | 16476155  | 16476555  | Promoter (6-7kb)  | 1       | 16476930  | 16483341  | 6786          | ENSG00000080947 | CROCCP3      |
| NR4A3_R848 | chr1    | 16624056  | 16624456  | Promoter (1-2kb)  | 1       | 16618253  | 16626386  | 1930          | ENSG00000215908 | CROCCP2      |
| NR4A3_R848 | chr1    | 16716246  | 16716646  | Promoter (3-4kb)  | 1       | 16692280  | 16720157  | 3511          | NA              | ESPNP        |
| NR4A3_R848 | chr1    | 18273030  | 18273430  | Promoter (5-6kb)  | 1       | 18278845  | 18376367  | -5415         | ENSG00000117154 | IGSF21       |
| NR4A3_R848 | chr1    | 18356679  | 18357347  | Promoter (4-5kb)  | 1       | 18361367  | 18378483  | -4020         | ENSG00000117154 | IGSF21       |
| NR4A3_R848 | chr1    | 20290919  | 20291319  | Promoter (<=1kb)  | 1       | 20290919  | 20354251  | 0             | ENSG00000158816 | VWA5B1       |
| NR4A3_R848 | chr1    | 20638425  | 20638825  | Promoter (<=1kb)  | 1       | 20638129  | 20651316  | 296           | ENSG00000158828 | PINK1        |
| NR4A3_R848 | chr1    | 20703448  | 20703848  | Promoter (5-6kb)  | 1       | 20664014  | 20698439  | -5009         | ENSG00000117245 | KIF17        |
| NR4A3_R848 | chr1    | 21893527  | 21894027  | Promoter (2-3kb)  | 1       | 21889816  | 21896271  | 2244          | ENSG00000142798 | HSPG2        |
| NR4A3_R848 | chr1    | 25261339  | 25261739  | Promoter (6-7kb)  | 1       | 25253114  | 25267885  | 6146          | ENSG00000117616 | RSRP1        |
| NR4A3_R848 | chr1    | 25768015  | 25768415  | Promoter (3-4kb)  | 1       | 25772069  | 25782700  | -3654         | ENSG00000117643 | MAN1C1       |
| NR4A3_R848 | chr1    | 26918562  | 26918962  | Promoter (2-3kb)  | 1       | 26921743  | 26946871  | -2781         | ENSG00000090273 | NUDC         |
| NR4A3_R848 | chr1    | 27147044  | 27147444  | Promoter (7-8kb)  | 1       | 27105451  | 27154598  | 7154          | ENSG00000090020 | SLC9A1       |
| NR4A3_R848 | chr1    | 29282720  | 29283120  | Promoter (<=1kb)  | 1       | 29283723  | 29304040  | -603          | ENSG00000060656 | PTPRU        |
| NR4A3_R848 | chr1    | 31580472  | 31580872  | Promoter (<=1kb)  | 1       | 31579753  | 31585876  | 719           | ENSG00000142910 | TINAGL1      |
| NR4A3_R848 | chr1    | 35433866  | 35434266  | Promoter (8-9kb)  | 1       | 35442267  | 35443255  | 8989          | ENSG00000142687 | KIAA0319L    |
| NR4A3_R848 | chr1    | 36133069  | 36133469  | Promoter (7-8kb)  | 1       | 36136581  | 36140998  | 7529          | ENSG00000054116 | TRAPPC3      |
| NR4A3_R848 | chr1    | 43904693  | 43905093  | Promoter (5-6kb)  | 1       | 43899588  | 43930176  | 5105          | ENSG00000126091 | ST3GAL3      |
| NR4A3_R848 | chr1    | 45294357  | 45294757  | Promoter (9-10kb) | 1       | 45303910  | 45305619  | -9153         | ENSG00000281912 | LINC01144    |
| NR4A3_R848 | chr1    | 53098174  | 53098574  | Promoter (7-8kb)  | 1       | 53087184  | 53090982  | -7192         | ENSG00000162383 | SLC1A7       |
| NR4A3_R848 | chr1    | 62270238  | 62270638  | Promoter (2-3kb)  | 1       | 62237544  | 62272791  | 2153          | ENSG00000132854 | KANK4        |
| NR4A3_R848 | chr1    | 64120894  | 64121294  | Promoter (8-9kb)  | 1       | 64106828  | 64112207  | -8687         | ENSG00000223949 | ROR1-AS1     |
| NR4A3_R848 | chr1    | 111998104 | 111998504 | Promoter (7-8kb)  | 1       | 111990536 | 111998842 | 7568          | ENSG00000231437 | LINC01750    |
| NR4A3_R848 | chr1    | 113063807 | 113064207 | Promoter (8-9kb)  | 1       | 113011687 | 113073113 | 8906          | ENSG00000238198 | LRIG2-DT     |
| NR4A3_R848 | chr1    | 153689878 | 153690278 | Promoter (<=1kb)  | 1       | 153689705 | 153689793 | -85           | ENSG00000274940 | MIR8083      |
| NR4A3_R848 | chr1    | 155093378 | 155093778 | Promoter (7-8kb)  | 1       | 155085522 | 155086923 | 7856          | ENSG00000143590 | EFGNA3       |
| NR4A3_R848 | chr1    | 156489958 | 156490358 | Promoter (<=1kb)  | 1       | 156466210 | 156490599 | 241           | ENSG00000116604 | MEF2D        |
| NR4A3_R848 | chr1    | 169621016 | 169621416 | Promoter (1-2kb)  | 1       | 169588849 | 169619219 | -1797         | ENSG00000174175 | SELP         |
| NR4A3_R848 | chr1    | 177351827 | 177352227 | Promoter (<=1kb)  | 1       | 177351580 | 177367272 | 247           | ENSG00000224968 | LINC01645    |
| NR4A3_R848 | chr1    | 179134937 | 179135337 | Promoter (<=1kb)  | 1       | 179131154 | 179134196 | -741          | ENSG00000143322 | ABL2         |
| NR4A3_R848 | chr1    | 201007381 | 201007781 | Promoter (1-2kb)  | 1       | 201001407 | 201005590 | -1791         | ENSG00000116852 | KIF21B       |
| NR4A3_R848 | chr1    | 203499928 | 203500328 | Promoter (3-4kb)  | 1       | 203495970 | 203499709 | 3958          | ENSG00000188770 | OPTC         |
| NR4A3_R848 | chr1    | 204148154 | 204148554 | Promoter (<=1kb)  | 1       | 204134548 | 204147575 | -579          | ENSG00000143845 | ETNK2        |
| NR4A3_R848 | chr1    | 209770723 | 209771123 | Promoter (2-3kb)  | 1       | 209768615 | 209782313 | 2108          | ENSG00000009790 | TRAF3IP3     |
| NR4A3_R848 | chr1    | 212427116 | 212427516 | Promoter (5-6kb)  | 1       | 212432920 | 212446379 | -5404         | ENSG00000117691 | NENF         |
| NR4A3_R848 | chr1    | 223744673 | 223745073 | Promoter (2-3kb)  | 1       | 223747108 | 223749476 | -2035         | ENSG00000162909 | CAPN2        |
| NR4A3_R848 | chr1    | 226944622 | 226945022 | Promoter (4-5kb)  | 1       | 226940379 | 226977523 | 4243          | ENSG00000163050 | COQ8A        |
| NR4A3_R848 | chr1    | 226977779 | 226978179 | Promoter (<=1kb)  | 1       | 226977404 | 226987544 | 375           | ENSG00000163050 | COQ8A        |
| NR4A3_R848 | chr1    | 227942414 | 227942814 | Promoter (<=1kb)  | 1       | 227941590 | 227941683 | -731          | ENSG00000264483 | MIR5008      |
| NR4A3_R848 | chr1    | 228069473 | 228069873 | Promoter (6-7kb)  | 1       | 228073909 | 228076550 | 6677          | ENSG00000276255 | LINC02809    |
| NR4A3_R848 | chr1    | 228070772 | 228071172 | Promoter (5-6kb)  | 1       | 228073909 | 228076550 | 5378          | ENSG00000276255 | LINC02809    |
| NR4A3_R848 | chr1    | 228072104 | 228072504 | Promoter (4-5kb)  | 1       | 228073909 | 228076550 | 4046          | ENSG00000276255 | LINC02809    |
| NR4A3_R848 | chr1    | 228621991 | 228622569 | Promoter (<=1kb)  | 1       | 228621447 | 228621565 | -426          | ENSG00000199352 | RNA5S1       |
| NR4A3_R848 | chr1    | 229535952 | 229536352 | Promoter (4-5kb)  | 1       | 229526062 | 229531902 | -4050         | ENSG00000135776 | ABCB10       |
| NR4A3_R848 | chr1    | 230335488 | 230335888 | Promoter (<=1kb)  | 1       | 230323542 | 230336295 | 407           | ENSG00000177614 | PGBD5        |
| NR4A3_R848 | chr1    | 231047347 | 231047747 | Promoter (7-8kb)  | 1       | 231018958 | 231040254 | -7093         | ENSG00000182118 | FAM89A       |
| NR4A3_R848 | chr1    | 233130686 | 233131086 | Promoter (4-5kb)  | 1       | 233089851 | 233135188 | 4102          | ENSG00000135749 | PCNX2        |
| NR4A3_R848 | chr1    | 236136731 | 236137131 | Promoter (5-6kb)  | 1       | 236142505 | 236205198 | -5374         | ENSG00000077585 | GPR137B      |
| NR4A3_R848 | chr1    | 236149675 | 236150075 | Promoter (7-8kb)  | 1       | 236142544 | 236180188 | 7131          | ENSG00000077585 | GPR137B      |
| NR4A3_R848 | chr1    | 248753196 | 248753596 | Promoter (2-3kb)  | 1       | 248739415 | 248755759 | 2163          | ENSG00000259823 | LYPD8        |
| NR4A3_R848 | chr2    | 1679634   | 1680037   | Promoter (3-4kb)  | 2       | 1666356   | 1676578   | -3056         | ENSG00000130508 | PXDN         |
| NR4A3_R848 | chr2    | 1866340   | 1866976   | Promoter (4-5kb)  | 2       | 1789241   | 1861677   | -4663         | ENSG00000186487 | MYT1L        |
| NR4A3_R848 | chr2    | 3283840   | 3284240   | Promoter (1-2kb)  | 2       | 3214186   | 3282826   | -1014         | ENSG00000032389 | EIPR1        |
| NR4A3_R848 | chr2    | 3527633   | 3528033   | Promoter (5-6kb)  | 2       | 3531990   | 3533370   | 5337          | ENSG00000171865 | RNASEH1      |
| NR4A3_R848 | chr2    | 3971434   | 3971834   | Promoter (1-2kb)  | 2       | 3972846   | 3973678   | 1844          | ENSG00000237401 | LINC01304    |
| NR4A3_R848 | chr2    | 6759997   | 6760397   | Promoter (9-10kb) | 2       | 6729168   | 6770311   | 9914          | ENSG00000205837 | LINC00487    |
| NR4A3_R848 | chr2    | 20664687  | 20665087  | Promoter (2-3kb)  | 2       | 20667144  | 20679243  | -2057         | ENSG00000143869 | GDF7         |
| NR4A3_R848 | chr2    | 26482515  | 26482915  | Promoter (4-5kb)  | 2       | 26457203  | 26478042  | -4473         | ENSG00000115155 | OTOF         |
| NR4A3_R848 | chr2    | 27504946  | 27505346  | Promoter (1-2kb)  | 2       | 27506510  | 27509791  | -1164         | ENSG00000084734 | GCKR         |
| NR4A3_R848 | chr2    | 28962397  | 28962797  | Promoter (5-6kb)  | 2       | 28956611  | 29033520  | 5786          | ENSG00000189350 | TOGARAM2     |
| NR4A3_R848 | chr2    | 28990505  | 28990905  | Promoter (9-10kb) | 2       | 28981298  | 29061373  | 9207          | ENSG00000189350 | TOGARAM2     |
| NR4A3_R848 | chr2    | 29216756  | 29217156  | Promoter (6-7kb)  | 2       | 29220870  | 29223394  | 6238          | ENSG00000171094 | ALK          |
| NR4A3_R848 | chr2    | 30918484  | 30918884  | Promoter (5-6kb)  | 2       | 30910599  | 30924823  | 5939          | ENSG00000158089 | GALNT14      |
| NR4A3_R848 | chr2    | 48353394  | 48353794  | Promoter (7-8kb)  | 2       | 48346217  | 48375565  | 7177          | ENSG00000170802 | FOXN2        |
| NR4A3_R848 | chr2    | 67086818  | 67087218  | Promoter (<=1kb)  | 2       | 67087013  | 67257966  | 0             | ENSG00000235885 | LOC101927661 |
| NR4A3_R848 | chr2    | 69447517  | 69447917  | Promoter (9-10kb) | 2       | 69396113  | 69437628  | -9889         | ENSG00000169599 | NFU1         |
| NR4A3_R848 | chr2    | 70189516  | 70189916  | Promoter (<=1kb)  | 2       | 70181650  | 70190699  | 783           | ENSG00000115998 | C2orf42      |
| NR4A3_R848 | chr2    | 71577404  | 71577804  | Promoter (<=1kb)  | 2       | 71576899  | 71686763  | 505           | ENSG00000135636 | DYSF         |
| NR4A3_R848 | chr2    | 71612945  | 71613345  | Promoter (2-3kb)  | 2       | 71610779  | 71644033  | 2166          | ENSG00000135636 | DYSF         |
| NR4A3_R848 | chr2    | 71617529  | 71617929  | Promoter (6-7kb)  | 2       | 71610779  | 71644033  | 6750          | ENSG00000135636 | DYSF         |
| NR4A3_R848 | chr2    | 71618233  | 71618690  | Promoter (7-8kb)  | 2       | 71610779  | 71644033  | 7454          | ENSG00000135636 | DYSF         |
| NR4A3_R848 | chr2    | 73086856  | 73087256  | Promoter (1-2kb)  | 2       | 73081204  | 73088328  | 1072          | ENSG00000135631 | RAB11FIP5    |
| NR4A3_R848 | chr2    | 74330079  | 74330479  | Promoter (1-2kb)  | 2       | 74265232  |           |               |                 |              |



| Condition  | peakChr | peakStart | peakEnd   | annotation        | geneChr | geneStart | geneEnd   | distanceToTSS | geneID          | geneSymbol   |
|------------|---------|-----------|-----------|-------------------|---------|-----------|-----------|---------------|-----------------|--------------|
| NR4A3_R848 | chr2    | 174454491 | 174454891 | Promoter (9–10kb) | 2       | 174436306 | 174445422 | -9069         | ENSG00000163328 | GPR155       |
| NR4A3_R848 | chr2    | 180691578 | 180691978 | Promoter (<=1kb)  | 2       | 180692104 | 180916939 | -126          | ENSG00000281131 | SCHLAP1      |
| NR4A3_R848 | chr2    | 187565296 | 187565696 | Promoter (<=1kb)  | 2       | 187496881 | 187565760 | 64            | ENSG00000003436 | TFPI         |
| NR4A3_R848 | chr2    | 217805390 | 217805790 | Promoter (4–5kb)  | 2       | 217809714 | 217810304 | 4514          | ENSG00000079308 | TNS1         |
| NR4A3_R848 | chr2    | 217989932 | 217990567 | Promoter (<=1kb)  | 2       | 217799795 | 217991014 | 447           | ENSG00000079308 | TNS1         |
| NR4A3_R848 | chr2    | 231005040 | 231005440 | Promoter (2–3kb)  | 2       | 231002771 | 231025055 | 2269          | ENSG00000173699 | SPATA3       |
| NR4A3_R848 | chr2    | 232384793 | 232385193 | Promoter (1–2kb)  | 2       | 232385750 | 232387044 | 1851          | ENSG00000244280 | ECEL1P2      |
| NR4A3_R848 | chr2    | 232540211 | 232540611 | Promoter (<=1kb)  | 2       | 232539748 | 232545716 | 463           | ENSG00000196811 | CHRNA3       |
| NR4A3_R848 | chr2    | 233015034 | 233015434 | Promoter (1–2kb)  | 2       | 232878701 | 233013256 | -1778         | ENSG00000066248 | NGEF         |
| NR4A3_R848 | chr2    | 237516754 | 237517154 | Promoter (<=1kb)  | 2       | 237518029 | 237553991 | -875          | ENSG00000115648 | MLPH         |
| NR4A3_R848 | chr2    | 237578716 | 237579116 | Promoter (<=1kb)  | 2       | 237574326 | 237579570 | 454           | ENSG00000124839 | RAB17        |
| NR4A3_R848 | chr2    | 238119137 | 238119537 | Promoter (7–8kb)  | 2       | 238127390 | 238133287 | -7853         | ENSG00000144488 | ESPNL        |
| NR4A3_R848 | chr2    | 238158142 | 238158542 | Promoter (<=1kb)  | 2       | 238158970 | 238168890 | -428          | ENSG00000178752 | ERFE         |
| NR4A3_R848 | chr2    | 238267113 | 238267513 | Promoter (4–5kb)  | 2       | 238261441 | 238262975 | -4138         | ENSG00000132326 | PER2         |
| NR4A3_R848 | chr2    | 239063179 | 239063579 | Promoter (3–4kb)  | 2       | 239053046 | 239066981 | 3402          | ENSG00000068024 | HDAC4        |
| NR4A3_R848 | chr2    | 239084502 | 239084902 | Promoter (1–2kb)  | 2       | 239085827 | 239085926 | 1024          | ENSG00000264810 | MIR4441      |
| NR4A3_R848 | chr2    | 239346423 | 239346823 | Promoter (4–5kb)  | 2       | 239351724 | 239351804 | 4981          | ENSG00000264292 | MIR2467      |
| NR4A3_R848 | chr2    | 240147416 | 240147816 | Promoter (2–3kb)  | 2       | 240139026 | 240144562 | -2854         | ENSG00000178602 | OTOS         |
| NR4A3_R848 | chr2    | 240468671 | 240469071 | Promoter (3–4kb)  | 2       | 240465527 | 240466793 | 3144          | ENSG00000063660 | GPC1         |
| NR4A3_R848 | chr2    | 240527178 | 240527578 | Promoter (<=1kb)  | 2       | 240521939 | 240527881 | 303           | ENSG00000144504 | ANKMY1       |
| NR4A3_R848 | chr2    | 240702526 | 240702926 | Promoter (5–6kb)  | 2       | 240696975 | 240698478 | 5551          | ENSG00000184945 | AQP12A       |
| NR4A3_R848 | chr2    | 241052308 | 241052708 | Promoter (1–2kb)  | 2       | 241051277 | 241052394 | 1031          | ENSG00000162804 | SNED1        |
| NR4A3_R848 | chr2    | 241073091 | 241073491 | Promoter (1–2kb)  | 2       | 241071406 | 241075605 | 1685          | ENSG00000162804 | SNED1        |
| NR4A3_R848 | chr2    | 241187695 | 241188095 | Promoter (<=1kb)  | 2       | 241188509 | 241196168 | -414          | ENSG00000146205 | ANO7         |
| NR4A3_R848 | chr2    | 241203181 | 241203581 | Promoter (4–5kb)  | 2       | 241199097 | 241200178 | 4084          | ENSG00000146205 | ANO7         |
| NR4A3_R848 | chr2    | 241516692 | 241517092 | Promoter (6–7kb)  | 2       | 241500143 | 241509730 | -6962         | ENSG00000115694 | STK25        |
| NR4A3_R848 | chr2    | 241769474 | 241769874 | Promoter (6–7kb)  | 2       | 241776822 | 241804287 | -6948         | ENSG00000154252 | GAL3ST2      |
| NR4A3_R848 | chr3    | 10450102  | 10450502  | Promoter (<=1kb)  | 3       | 10328203  | 10449780  | -322          | ENSG00000157087 | ATP2B2       |
| NR4A3_R848 | chr3    | 13614543  | 13614943  | Promoter (<=1kb)  | 3       | 13613898  | 13618993  | 645           | ENSG00000163520 | FBLN2        |
| NR4A3_R848 | chr3    | 13617391  | 13617867  | Promoter (3–4kb)  | 3       | 13613898  | 13618993  | 3493          | ENSG00000163520 | FBLN2        |
| NR4A3_R848 | chr3    | 14665661  | 14666061  | Promoter (1–2kb)  | 3       | 14668002  | 14671027  | -1941         | ENSG00000154781 | CCDC174      |
| NR4A3_R848 | chr3    | 37830026  | 37830426  | Promoter (4–5kb)  | 3       | 37804063  | 37834699  | 4273          | ENSG00000235257 | ITGA9-AS1    |
| NR4A3_R848 | chr3    | 41854733  | 41855133  | Promoter (<=1kb)  | 3       | 41800133  | 41854911  | 0             | ENSG00000168038 | ULK4         |
| NR4A3_R848 | chr3    | 42699954  | 42700354  | Promoter (<=1kb)  | 3       | 42698224  | 42701197  | 843           | ENSG0000010282  | HHATL        |
| NR4A3_R848 | chr3    | 46863827  | 46864227  | Promoter (<=1kb)  | 3       | 46857867  | 46863483  | -344          | ENSG00000160808 | MYL3         |
| NR4A3_R848 | chr3    | 47240787  | 47241187  | Promoter (9–10kb) | 3       | 47250523  | 47250626  | 9439          | NA              | SNORD13J     |
| NR4A3_R848 | chr3    | 49922474  | 49922874  | Promoter (6–7kb)  | 3       | 49907160  | 49929526  | 6652          | ENSG00000164077 | MON1A        |
| NR4A3_R848 | chr3    | 50654271  | 50654671  | Promoter (8–9kb)  | 3       | 50646212  | 50648627  | 8059          | ENSG00000114738 | MAPKAPK3     |
| NR4A3_R848 | chr3    | 52518612  | 52519012  | Promoter (<=1kb)  | 3       | 52518801  | 52523476  | 0             | ENSG00000010327 | STAB1        |
| NR4A3_R848 | chr3    | 53805741  | 53806159  | Promoter (1–2kb)  | 3       | 53807511  | 53812385  | -1352         | ENSG00000157388 | CACNA1D      |
| NR4A3_R848 | chr3    | 58009683  | 58010083  | Promoter (1–2kb)  | 3       | 58008400  | 58172251  | 1283          | ENSG00000136068 | FLNB         |
| NR4A3_R848 | chr3    | 58635516  | 58635916  | Promoter (7–8kb)  | 3       | 58567219  | 58627610  | -7906         | ENSG00000168309 | FAM107A      |
| NR4A3_R848 | chr3    | 71193091  | 71193491  | Promoter (4–5kb)  | 3       | 70959247  | 71198381  | 4890          | ENSG00000114861 | FOXP1        |
| NR4A3_R848 | chr3    | 75669084  | 75669484  | Promoter (2–3kb)  | 3       | 75672300  | 75742048  | -2816         | ENSG00000242516 | LINC00960    |
| NR4A3_R848 | chr3    | 123319578 | 123319978 | Promoter (1–2kb)  | 3       | 123300251 | 123318152 | -1426         | ENSG00000173175 | ADCY5        |
| NR4A3_R848 | chr3    | 126556567 | 126556967 | Promoter (1–2kb)  | 3       | 126549692 | 126558932 | 1959          | ENSG00000180697 | C3orf22      |
| NR4A3_R848 | chr3    | 126864799 | 126865551 | Promoter (9–10kb) | 3       | 126854864 | 126949879 | 9935          | ENSG00000159685 | CHCHD6       |
| NR4A3_R848 | chr3    | 128469660 | 128470060 | Promoter (2–3kb)  | 3       | 128462442 | 128467248 | -2412         | ENSG00000179407 | DNAJB8       |
| NR4A3_R848 | chr3    | 129516243 | 129516643 | Promoter (3–4kb)  | 3       | 129512381 | 129514820 | 3862          | ENSG00000163913 | IFT122       |
| NR4A3_R848 | chr3    | 129517106 | 129517506 | Promoter (4–5kb)  | 3       | 129512381 | 129514820 | 4725          | ENSG00000163913 | IFT122       |
| NR4A3_R848 | chr3    | 157071832 | 157072232 | Promoter (9–10kb) | 3       | 157081738 | 157088547 | -9506         | ENSG00000241544 | LINC02029    |
| NR4A3_R848 | chr3    | 186355292 | 186355692 | Promoter (6–7kb)  | 3       | 186149457 | 186361957 | 6265          | ENSG00000058866 | DGKG         |
| NR4A3_R848 | chr3    | 188240152 | 188240552 | Promoter (<=1kb)  | 3       | 188239864 | 188406291 | 288           | ENSG00000145012 | LPP          |
| NR4A3_R848 | chr3    | 194024999 | 194025399 | Promoter (1–2kb)  | 3       | 194005359 | 194027231 | 1832          | ENSG00000230102 | LINC02028    |
| NR4A3_R848 | chr3    | 194324553 | 194325009 | Promoter (1–2kb)  | 3       | 194301199 | 194322871 | -1682         | ENSG00000214145 | LINC00887    |
| NR4A3_R848 | chr3    | 194326763 | 194327163 | Promoter (3–4kb)  | 3       | 194301199 | 194322871 | -3892         | ENSG00000214145 | LINC00887    |
| NR4A3_R848 | chr3    | 194351740 | 194352140 | Promoter (<=1kb)  | 3       | 194339768 | 194351328 | -412          | ENSG00000178772 | CPN2         |
| NR4A3_R848 | chr3    | 196141872 | 196142272 | Promoter (<=1kb)  | 3       | 196142525 | 196160405 | -253          | ENSG00000224652 | LINC00885    |
| NR4A3_R848 | chr4    | 668305    | 668705    | Promoter (3–4kb)  | 4       | 664910    | 670314    | 3395          | ENSG00000133256 | PDE6B        |
| NR4A3_R848 | chr4    | 821908    | 822308    | Promoter (3–4kb)  | 4       | 784958    | 826092    | 3784          | ENSG00000168993 | CPLX1        |
| NR4A3_R848 | chr4    | 847554    | 847954    | Promoter (3–4kb)  | 4       | 849276    | 851673    | 3719          | ENSG00000178950 | GAK          |
| NR4A3_R848 | chr4    | 1175114   | 1175514   | Promoter (1–2kb)  | 4       | 1171381   | 1173211   | -1903         | ENSG00000159674 | SPON2        |
| NR4A3_R848 | chr4    | 1316809   | 1317209   | Promoter (7–8kb)  | 4       | 1309787   | 1339281   | 7022          | ENSG00000090316 | MAEA         |
| NR4A3_R848 | chr4    | 1323798   | 1324198   | Promoter (4–5kb)  | 4       | 1329057   | 1340113   | -4859         | ENSG00000090316 | MAEA         |
| NR4A3_R848 | chr4    | 1324538   | 1325025   | Promoter (4–5kb)  | 4       | 1329057   | 1340113   | -4032         | ENSG00000090316 | MAEA         |
| NR4A3_R848 | chr4    | 1365373   | 1365773   | Promoter (<=1kb)  | 4       | 1366077   | 1386258   | -304          | ENSG00000163945 | UVSSA        |
| NR4A3_R848 | chr4    | 2826252   | 2826652   | Promoter (<=1kb)  | 4       | 2826325   | 2834289   | 0             | ENSG00000087266 | SH3BP2       |
| NR4A3_R848 | chr4    | 2922626   | 2923026   | Promoter (3–4kb)  | 4       | 2926309   | 2928291   | -3283         | ENSG00000087274 | ADD1         |
| NR4A3_R848 | chr4    | 3362239   | 3362639   | Promoter (7–8kb)  | 4       | 3369879   | 3439905   | -7240         | ENSG00000159788 | RGS12        |
| NR4A3_R848 | chr4    | 3578333   | 3578733   | Promoter (1–2kb)  | 4       | 3576934   | 3590711   | 1399          | NA              | LINC00955    |
| NR4A3_R848 | chr4    | 3677997   | 3678426   | Promoter (<=1kb)  | 4       | 3673593   | 3677855   | -142          | ENSG00000250632 | LINC02171    |
| NR4A3_R848 | chr4    | 6620569   | 6620969   | Promoter (3–4kb)  | 4       | 6617448   | 6618916   | 3121          | ENSG00000013288 | MAN2B2       |
| NR4A3_R848 | chr4    | 7724529   | 7724929   | Promoter (9–10kb) | 4       | 7734280   | 7740720   | -9351         | ENSG00000184985 | SORCS2       |
| NR4A3_R848 | chr4    | 8012626   | 8013026   | Promoter (1–2kb)  | 4       | 8007385   | 8010728   | -1898         | ENSG00000163995 | ABLIM2       |
| NR4A3_R848 | chr4    | 8229439   | 8229839   | Promoter (<=1kb)  | 4       | 8229224   | 8232894   | 215           | ENSG00000125089 | SH3TC1       |
| NR4A3_R848 | chr4    | 8587010   | 8587410   | Promoter (4–5kb)  | 4       | 8582791   | 8587750   | 4219          | ENSG00000155269 | GPR78        |
| NR4A3_R848 | chr4    | 9368597   | 9368997   | Promoter (<=1kb)  | 4       | 9367874   | 9369070   | 723           | ENSG00000205946 | USP17L6P     |
| NR4A3_R848 | chr4    | 26492060  | 26492460  | Promoter (1–2kb)  | 4       | 26481396  | 26490484  | -1576         | ENSG00000163394 | CKAR         |
| NR4A3_R848 | chr4    | 42383907  | 42384307  | Promoter (6–7kb)  | 4       | 42281830  | 42391233  | 6926          | ENSG00000250781 | LOC105374428 |
| NR4A3_R848 | chr4    | 87614309  | 87614709  | Promoter (5–6kb)  | 4       | 87608529  | 87616873  | 5780          | ENSG00000152591 | DSPP         |
| NR4A3_R848 | chr4    | 112568682 | 112569082 | Promoter (7–8kb)  | 4       | 112539429 | 112561538 | -7144         | ENSG00000138658 | ZGRF1        |
| NR4A3_R848 | chr4    | 121673996 | 121674396 | Promoter (1–2kb)  | 4       | 121669312 | 121672558 | -1438         | ENSG00000164111 | ANXA5        |
| NR4A3_R848 | chr4    | 184220244 | 184220644 | Promoter (<=1kb)  | 4       | 184116863 | 184221230 | 584           | ENSG00000164303 | ENPP6        |
| NR4A3_R848 | chr4    | 186252467 | 186252867 | Promoter (1–2kb)  | 4       | 186251032 | 186252163 | 1435          | ENSG00000164344 | KLKB1        |
| NR4A3_R848 | chr4    | 186546619 | 186547019 | Promoter (8–9kb)  | 4       | 186426546 | 186555328 | 8309          | ENSG00000251165 | F11-AS1      |
| NR4A3_R848 | chr5    | 146178    | 146578    | Promoter (5–6kb)  | 5       | 140566    | 157110    | 5612          | ENSG00000153404 | PLEKHG4B     |
| NR4A3_R848 | chr5    | 426162    | 426562    | Promoter (1–2kb)  | 5       | 427918    | 434409    | -1356         | ENSG00000286169 | AHRR         |
| NR4A3_R848 | chr5    | 863836    | 864236    | Promoter (2–3kb)  | 5       | 863741    | 866501    | 2265          | ENSG00000028310 | BRD9         |
| NR4A3_R848 | chr5    | 1198333   | 1198733   | Promoter (2–3kb)  | 5       | 1201595   | 1223270   | -2862         | ENSG00000174358 | SLC6A19      |
| NR4A3_R848 | chr5    | 1199210   | 1199610   | Promoter (1–2kb)  | 5       | 1201595   | 1223270   | -1985         | ENSG00000174358 | SLC6A19      |
| NR4A3_R848 | chr5    | 1229434   | 1229834   | Promoter (4–5kb)  | 5       | 1225409   | 1232839   | 4025          | ENSG00000164363 | SLC6A18      |
| NR4A3_R848 | chr5    | 6447443   | 6447843   | Promoter (1–2kb)  | 5       | 6448859   | 6496723   | -1016         | ENSG00000215218 | UBE2QL1      |
| NR4A3_R848 | chr5    | 34190830  | 34191230  | Promoter (<=1kb)  | 5       | 34190056  | 34193653  | 774           | NA              | LOC646652    |
| NR4A3_R848 | chr5    | 34191662  | 34192062  | Promoter (1–2kb)  | 5       | 34190056  |           |               |                 |              |

| Condition  | peakChr | peakStart | peakEnd   | annotation        | geneChr | geneStart | geneEnd   | distanceToTSS | geneID          | geneSymbol   |
|------------|---------|-----------|-----------|-------------------|---------|-----------|-----------|---------------|-----------------|--------------|
| NR4A3_R848 | chr5    | 176800330 | 176800730 | Promoter (9–10kb) | 5       | 176810519 | 176880898 | -9789         | ENSG00000113763 | UNC5A        |
| NR4A3_R848 | chr5    | 177096696 | 177097191 | Promoter (<=1kb)  | 5       | 177097191 | 177097764 | 0             | ENSG00000160867 | FGFR4        |
| NR4A3_R848 | chr5    | 178788847 | 178789247 | Promoter (8–9kb)  | 5       | 178767204 | 178797611 | 8364          | ENSG00000250420 | AACSP1       |
| NR4A3_R848 | chr5    | 181045905 | 181046333 | Promoter (2–3kb)  | 5       | 181043403 | 181043484 | -2421         | ENSG00000277912 | MIR8089      |
| NR4A3_R848 | chr6    | 33598502  | 33598902  | Promoter (5–6kb)  | 6       | 33586106  | 33593338  | -5164         | ENSG00000197251 | LINC00336    |
| NR4A3_R848 | chr6    | 34071355  | 34071755  | Promoter (7–8kb)  | 6       | 34022138  | 34063635  | -7720         | ENSG00000124493 | GRM4         |
| NR4A3_R848 | chr6    | 34072873  | 34073273  | Promoter (9–10kb) | 6       | 34022138  | 34063635  | -9238         | ENSG00000124493 | GRM4         |
| NR4A3_R848 | chr6    | 36338303  | 36338703  | Promoter (1–2kb)  | 6       | 36315761  | 36336888  | -1415         | ENSG00000189325 | BNIP5        |
| NR4A3_R848 | chr6    | 39845181  | 39845581  | Promoter (2–3kb)  | 6       | 39848566  | 39861161  | -2985         | ENSG00000146122 | DAAM2        |
| NR4A3_R848 | chr6    | 40350093  | 40350493  | Promoter (3–4kb)  | 6       | 40344344  | 40346151  | -3942         | NA              | LINC00951    |
| NR4A3_R848 | chr6    | 43294638  | 43295038  | Promoter (<=1kb)  | 6       | 43295694  | 43299520  | -656          | ENSG00000137204 | SLC22A7      |
| NR4A3_R848 | chr6    | 56099214  | 56099614  | Promoter (7–8kb)  | 6       | 56056591  | 56091661  | -7553         | ENSG00000124749 | COL21A1      |
| NR4A3_R848 | chr6    | 61574100  | 61574510  | Promoter (<=1kb)  | 6       | 61574328  | 61574402  | 0             | NA              | MTRNR2L9     |
| NR4A3_R848 | chr6    | 111361223 | 111361623 | Promoter (2–3kb)  | 6       | 111356668 | 111358901 | -2322         | ENSG00000009413 | REV3L        |
| NR4A3_R848 | chr6    | 149640888 | 149641288 | Promoter (2–3kb)  | 6       | 149594873 | 149638592 | -2296         | ENSG00000186625 | KATNA1       |
| NR4A3_R848 | chr6    | 152743194 | 152743594 | Promoter (7–8kb)  | 6       | 152750797 | 152759760 | -7203         | ENSG00000146469 | VIP          |
| NR4A3_R848 | chr6    | 159168404 | 159168804 | Promoter (<=1kb)  | 6       | 159169400 | 159272108 | -596          | ENSG00000164694 | FNDC1        |
| NR4A3_R848 | chr6    | 160668695 | 160669095 | Promoter (4–5kb)  | 6       | 160531483 | 160664259 | -4436         | ENSG00000198670 | LPA          |
| NR4A3_R848 | chr6    | 163329136 | 163329536 | Promoter (4–5kb)  | 6       | 163306907 | 163324530 | -4606         | ENSG00000281692 | PACRG-AS1    |
| NR4A3_R848 | chr6    | 166415958 | 166416382 | Promoter (7–8kb)  | 6       | 166412296 | 166423984 | 7602          | ENSG00000071242 | RPS6KA2      |
| NR4A3_R848 | chr6    | 166507465 | 166507865 | Promoter (1–2kb)  | 6       | 166509354 | 166509433 | 1568          | ENSG00000222958 | MIR1913      |
| NR4A3_R848 | chr6    | 168058131 | 168058531 | Promoter (7–8kb)  | 6       | 168055784 | 168065977 | 7446          | ENSG00000153303 | FRMD1        |
| NR4A3_R848 | chr6    | 168659436 | 168659848 | Promoter (6–7kb)  | 6       | 168653203 | 168673445 | 6233          | ENSG00000112562 | SMOC2        |
| NR4A3_R848 | chr6    | 169185448 | 169185848 | Promoter (2–3kb)  | 6       | 169175277 | 169182841 | -2607         | ENSG00000261039 | LINC02544    |
| NR4A3_R848 | chr6    | 169218148 | 169218816 | Promoter (3–4kb)  | 6       | 169214447 | 169217790 | 3701          | NA              | LOC101929523 |
| NR4A3_R848 | chr6    | 169233466 | 169233866 | Promoter (3–4kb)  | 6       | 169234510 | 169237412 | 3546          | ENSG00000186340 | THBS2        |
| NR4A3_R848 | chr6    | 169650092 | 169650492 | Promoter (<=1kb)  | 6       | 169457212 | 169649233 | -859          | ENSG00000184465 | WDR27        |
| NR4A3_R848 | chr7    | 554401    | 554801    | Promoter (7–8kb)  | 7       | 561958    | 565619    | -7157         | ENSG00000229380 | PRKAR1B-AS2  |
| NR4A3_R848 | chr7    | 566214    | 566614    | Promoter (4–5kb)  | 7       | 561958    | 565619    | 4256          | ENSG00000229380 | PRKAR1B-AS2  |
| NR4A3_R848 | chr7    | 598037    | 598437    | Promoter (4–5kb)  | 7       | 550270    | 602683    | 4246          | ENSG00000188191 | PRKAR1B      |
| NR4A3_R848 | chr7    | 826717    | 827117    | Promoter (3–4kb)  | 7       | 830930    | 842035    | -3813         | ENSG00000164828 | SUN1         |
| NR4A3_R848 | chr7    | 921584    | 921984    | Promoter (<=1kb)  | 7       | 899465    | 920889    | -695          | ENSG00000105963 | ADAP1        |
| NR4A3_R848 | chr7    | 1016813   | 1017213   | Promoter (5–6kb)  | 7       | 1022933   | 1023026   | 5813          | ENSG00000199023 | MIR339       |
| NR4A3_R848 | chr7    | 1526287   | 1526687   | Promoter (4–5kb)  | 7       | 1530702   | 1543043   | -4015         | ENSG00000198517 | MAFK         |
| NR4A3_R848 | chr7    | 1618660   | 1619060   | Promoter (4–5kb)  | 7       | 1614590   | 1615325   | 4070          | NA              | TFAMP1       |
| NR4A3_R848 | chr7    | 1690498   | 1690898   | Promoter (2–3kb)  | 7       | 1688119   | 1747954   | 2379          | ENSG00000225968 | ELFN1        |
| NR4A3_R848 | chr7    | 2102525   | 2102925   | Promoter (4–5kb)  | 7       | 2014506   | 2107708   | 4783          | ENSG00000002822 | MAD1L1       |
| NR4A3_R848 | chr7    | 2318954   | 2319354   | Promoter (4–5kb)  | 7       | 2274960   | 2314441   | -4513         | ENSG00000106266 | SNX8         |
| NR4A3_R848 | chr7    | 2514479   | 2514879   | Promoter (1–2kb)  | 7       | 2512529   | 2528427   | 1950          | ENSG00000106003 | LFNG         |
| NR4A3_R848 | chr7    | 2912726   | 2913126   | Promoter (9–10kb) | 7       | 2917290   | 2923040   | 9914          | ENSG00000198286 | CARD11       |
| NR4A3_R848 | chr7    | 6275341   | 6275741   | Promoter (2–3kb)  | 7       | 6187064   | 6272644   | -2697         | ENSG00000008256 | CYTH3        |
| NR4A3_R848 | chr7    | 6651221   | 6651621   | Promoter (9–10kb) | 7       | 6641885   | 6644565   | 9336          | ENSG00000205903 | ZNF316       |
| NR4A3_R848 | chr7    | 6776765   | 6777165   | Promoter (5–6kb)  | 7       | 6771183   | 6773414   | 5582          | ENSG00000155026 | RSPH10B      |
| NR4A3_R848 | chr7    | 31077221  | 31077621  | Promoter (9–10kb) | 7       | 31086971  | 31104899  | -9350         | ENSG00000078549 | ADCYAP1R1    |
| NR4A3_R848 | chr7    | 44328359  | 44328759  | Promoter (2–3kb)  | 7       | 44247129  | 44326167  | -2192         | ENSG00000058404 | CAMK2B       |
| NR4A3_R848 | chr7    | 50713416  | 50713851  | Promoter (8–9kb)  | 7       | 50590063  | 50705301  | -8115         | ENSG00000106070 | GRB10        |
| NR4A3_R848 | chr7    | 57181764  | 57182164  | Promoter (1–2kb)  | 7       | 57177409  | 57180052  | -1712         | NA              | GUSBP10      |
| NR4A3_R848 | chr7    | 66355297  | 66355697  | Promoter (2–3kb)  | 7       | 66352504  | 66420543  | 2793          | ENSG00000169902 | TPST1        |
| NR4A3_R848 | chr7    | 73428076  | 73428476  | Promoter (5–6kb)  | 7       | 73433778  | 73436120  | -5302         | ENSG00000188763 | FZD9         |
| NR4A3_R848 | chr7    | 74049409  | 74049809  | Promoter (2–3kb)  | 7       | 74052294  | 74056365  | -2485         | ENSG00000049540 | ELN          |
| NR4A3_R848 | chr7    | 74053668  | 74054068  | Promoter (<=1kb)  | 7       | 74052851  | 74056347  | 817           | ENSG00000049540 | ELN          |
| NR4A3_R848 | chr7    | 75937210  | 75937610  | Promoter (6–7kb)  | 7       | 75943782  | 75943916  | -6172         | ENSG00000201643 | SNORA14A     |
| NR4A3_R848 | chr7    | 87209199  | 87209599  | Promoter (6–7kb)  | 7       | 87197718  | 87203043  | -6156         | ENSG00000135185 | TMEM243      |
| NR4A3_R848 | chr7    | 92167563  | 92167963  | Promoter (2–3kb)  | 7       | 92144884  | 92165276  | -2287         | ENSG00000240720 | LRRD1        |
| NR4A3_R848 | chr7    | 98242564  | 98243086  | Promoter (<=1kb)  | 7       | 98238504  | 98243574  | 488           | ENSG00000205356 | TECPR1       |
| NR4A3_R848 | chr7    | 99401992  | 99402392  | Promoter (2–3kb)  | 7       | 99403317  | 99404942  | 2550          | ENSG00000106244 | PDAP1        |
| NR4A3_R848 | chr7    | 99426016  | 99426416  | Promoter (8–9kb)  | 7       | 99429098  | 99435019  | 8603          | ENSG00000106246 | PTCD1        |
| NR4A3_R848 | chr7    | 100457447 | 100457847 | Promoter (6–7kb)  | 7       | 100456924 | 100463873 | 6026          | ENSG00000185955 | C7orf61      |
| NR4A3_R848 | chr7    | 100567482 | 100567882 | Promoter (5–6kb)  | 7       | 100572317 | 100573066 | 5184          | ENSG00000205307 | SAP25        |
| NR4A3_R848 | chr7    | 100958483 | 100958923 | Promoter (<=1kb)  | 7       | 100957965 | 100967890 | 518           | ENSG00000169894 | MUC3A        |
| NR4A3_R848 | chr7    | 100971280 | 100971680 | Promoter (1–2kb)  | 7       | 100969623 | 101018949 | 1657          | ENSG00000205277 | MUC12        |
| NR4A3_R848 | chr7    | 102512732 | 102513132 | Promoter (4–5kb)  | 7       | 102483562 | 102517755 | 4623          | ENSG00000170667 | RASA4B       |
| NR4A3_R848 | chr7    | 127259492 | 127259892 | Promoter (6–7kb)  | 7       | 126438598 | 127253294 | -6198         | ENSG00000179603 | GRM8         |
| NR4A3_R848 | chr7    | 139522217 | 139522617 | Promoter (1–2kb)  | 7       | 139523685 | 139544985 | -1068         | ENSG00000236279 | CLEC2L       |
| NR4A3_R848 | chr7    | 143230624 | 143231024 | Promoter (8–9kb)  | 7       | 143222037 | 143223079 | 8587          | ENSG00000221937 | TAS2R40      |
| NR4A3_R848 | chr7    | 154882949 | 154883488 | Promoter (<=1kb)  | 7       | 154883568 | 154891230 | -80           | ENSG00000130226 | DPP6         |
| NR4A3_R848 | chr7    | 156449212 | 156449612 | Promoter (3–4kb)  | 7       | 156436980 | 156445588 | -3624         | NA              | LOC285889    |
| NR4A3_R848 | chr7    | 157461213 | 157461613 | Promoter (4–5kb)  | 7       | 157466231 | 157499716 | -4618         | ENSG00000234210 | LOC101927914 |
| NR4A3_R848 | chr7    | 159106285 | 159106685 | Promoter (9–10kb) | 7       | 159030455 | 159097204 | -9081         | ENSG00000106018 | VIPR2        |
| NR4A3_R848 | chr8    | 696677    | 697077    | Promoter (9–10kb) | 8       | 673844    | 686724    | -9953         | ENSG00000104714 | ERICH1       |
| NR4A3_R848 | chr8    | 22068408  | 22068808  | Promoter (1–2kb)  | 8       | 22066516  | 22069060  | 1892          | ENSG00000158856 | DMTN         |
| NR4A3_R848 | chr8    | 23703557  | 23703957  | Promoter (2–3kb)  | 8       | 23702451  | 23706598  | 2641          | ENSG00000180053 | NKX2-6       |
| NR4A3_R848 | chr8    | 27265527  | 27265927  | Promoter (7–8kb)  | 8       | 27236475  | 27258420  | -7107         | ENSG00000015592 | STMN4        |
| NR4A3_R848 | chr8    | 37518082  | 37518482  | Promoter (<=1kb)  | 8       | 37516407  | 37517728  | -354          | ENSG00000253414 | LINC01605    |
| NR4A3_R848 | chr8    | 37559185  | 37559585  | Promoter (5–6kb)  | 8       | 37450763  | 37554183  | -5002         | ENSG00000253414 | LINC01605    |
| NR4A3_R848 | chr8    | 48626182  | 48626582  | Promoter (5–6kb)  | 8       | 48620465  | 48623895  | 5717          | ENSG00000253455 | LOC101929217 |
| NR4A3_R848 | chr8    | 48726451  | 48726851  | Promoter (2–3kb)  | 8       | 48713634  | 48729789  | 2938          | ENSG00000034239 | EFCAB1       |
| NR4A3_R848 | chr8    | 56310184  | 56310584  | Promoter (9–10kb) | 8       | 56300010  | 56320175  | 9591          | ENSG00000170786 | SDR16C5      |
| NR4A3_R848 | chr8    | 85714534  | 85714934  | Promoter (<=1kb)  | 8       | 85714922  | 85715833  | 0             | ENSG00000277422 | REXO1L2P     |
| NR4A3_R848 | chr8    | 92026809  | 92027209  | Promoter (7–8kb)  | 8       | 92005231  | 92019175  | -7634         | ENSG00000079102 | RUNX1T1      |
| NR4A3_R848 | chr8    | 97767922  | 97768322  | Promoter (6–7kb)  | 8       | 97775057  | 97852598  | -6735         | ENSG00000104341 | LAPTM4B      |
| NR4A3_R848 | chr8    | 123659752 | 123660152 | Promoter (6–7kb)  | 8       | 123645527 | 123652950 | -6802         | ENSG00000175946 | KLHL38       |
| NR4A3_R848 | chr8    | 134590589 | 134590989 | Promoter (3–4kb)  | 8       | 134512574 | 134594885 | 3896          | ENSG00000066827 | ZFAT         |
| NR4A3_R848 | chr8    | 138882794 | 138883194 | Promoter (<=1kb)  | 8       | 138588897 | 138883211 | 17            | ENSG00000169436 | COL22A1      |
| NR4A3_R848 | chr8    | 139872070 | 139872470 | Promoter (8–9kb)  | 8       | 139730996 | 139881295 | 8825          | ENSG00000167632 | TRAPPC9      |
| NR4A3_R848 | chr8    | 140272022 | 140272422 | Promoter (3–4kb)  | 8       | 140252571 | 140275753 | 3331          | ENSG00000167632 | TRAPPC9      |
| NR4A3_R848 | chr8    | 142192670 | 142193160 | Promoter (5–6kb)  | 8       | 142198356 | 142209003 | -5196         | ENSG00000254008 | LINC00051    |
| NR4A3_R848 | chr8    | 142207160 | 142207804 | Promoter (8–9kb)  | 8       | 142198356 | 142209003 | 8804          | ENSG00000254008 | LINC00051    |
| NR4A3_R848 | chr8    | 142272283 | 142272683 | Promoter (7–8kb)  | 8       | 142271567 | 142279997 | 7314          | ENSG00000171045 | TSNARE1      |
| NR4A3_R848 | chr8    | 142285152 | 142285552 | Promoter (5–6kb)  | 8       | 142271567 | 142279997 | -5155         | ENSG00000171045 | TSNARE1      |
| NR4A3_R848 | chr8    | 142469037 | 142469437 | Promoter (5–6kb)  | 8       | 142464016 | 142450006 | 5021          | ENSG00000181790 | ADGRB1       |
| NR4A3_R848 | chr8    | 142744362 | 142744762 | Promoter (1–2kb)  | 8       | 142740949 | 142742406 | -1956         | ENSG00000126233 | SLURP1       |
| NR4A3_R848 | chr8    | 142751290 | 142751690 | Promoter (<=1kb)  | 8       | 142750150 | 142752532 | 842           | ENSG00000197353 | LYPD2        |
| NR4A3_R848 | chr8    | 143296831 | 143297231 |                   |         |           |           |               |                 |              |



| Condition  | peakChr | peakStart | peakEnd   | annotation        | geneChr | geneStart | geneEnd   | distanceToTSS | geneID          | geneSymbol   |
|------------|---------|-----------|-----------|-------------------|---------|-----------|-----------|---------------|-----------------|--------------|
| NR4A3_R848 | chr9    | 92160503  | 92160903  | Promoter (7-8kb)  | 9       | 92152594  | 92158488  | 7909          | NA              | LINC00475    |
| NR4A3_R848 | chr9    | 92803788  | 92804188  | Promoter (5-6kb)  | 9       | 92809388  | 92888693  | -5200         | ENSG00000187984 | ANKRD19P     |
| NR4A3_R848 | chr9    | 93136205  | 93136605  | Promoter (1-2kb)  | 9       | 93121496  | 93134251  | -1954         | ENSG00000131669 | NINJ1        |
| NR4A3_R848 | chr9    | 93818354  | 93818754  | Promoter (<=1kb)  | 9       | 93819357  | 93819421  | -603          | ENSG00000265347 | MIR4291      |
| NR4A3_R848 | chr9    | 94555563  | 94555963  | Promoter (<=1kb)  | 9       | 94555083  | 94570916  | 480           | NA              | PCAT7        |
| NR4A3_R848 | chr9    | 98393242  | 98393642  | Promoter (4-5kb)  | 9       | 98362555  | 98388887  | -4355         | ENSG00000136928 | GABBR2       |
| NR4A3_R848 | chr9    | 114096074 | 114096474 | Promoter (1-2kb)  | 9       | 114093306 | 114097716 | 1242          | ENSG00000136883 | KIF12        |
| NR4A3_R848 | chr9    | 114278165 | 114278565 | Promoter (9-10kb) | 9       | 114268807 | 114274230 | 9358          | ENSG00000196739 | COL27A1      |
| NR4A3_R848 | chr9    | 115143794 | 115144194 | Promoter (1-2kb)  | 9       | 115141818 | 115402644 | 1976          | ENSG00000173077 | DELEC1       |
| NR4A3_R848 | chr9    | 121706840 | 121707240 | Promoter (7-8kb)  | 9       | 121699370 | 121785528 | 7470          | ENSG00000136848 | DAB2IP       |
| NR4A3_R848 | chr9    | 123347591 | 123347991 | Promoter (8-9kb)  | 9       | 123356170 | 123374099 | -8179         | ENSG00000148204 | CRB2         |
| NR4A3_R848 | chr9    | 126275777 | 126276177 | Promoter (<=1kb)  | 9       | 126270121 | 126275918 | 0             | ENSG00000288537 | LOC101929116 |
| NR4A3_R848 | chr9    | 128334076 | 128334476 | Promoter (3-4kb)  | 9       | 128330412 | 128334068 | 3664          | ENSG00000167113 | COQ4         |
| NR4A3_R848 | chr9    | 129095110 | 129095510 | Promoter (2-3kb)  | 9       | 129095456 | 129098036 | 2526          | ENSG00000095321 | CRAT         |
| NR4A3_R848 | chr9    | 129647823 | 129648223 | Promoter (5-6kb)  | 9       | 129634604 | 129642169 | -5654         | ENSG00000148331 | ASB6         |
| NR4A3_R848 | chr9    | 133930308 | 133930708 | Promoter (8-9kb)  | 9       | 133925851 | 133939301 | 8593          | ENSG00000160293 | VAV2         |
| NR4A3_R848 | chr9    | 134653758 | 134654158 | Promoter (<=1kb)  | 9       | 134653185 | 134709227 | 573           | ENSG00000130635 | COL5A1       |
| NR4A3_R848 | chr9    | 134727234 | 134727634 | Promoter (3-4kb)  | 9       | 134731593 | 134732669 | -3959         | ENSG00000130635 | COL5A1       |
| NR4A3_R848 | chr9    | 134847496 | 134847896 | Promoter (1-2kb)  | 9       | 134849298 | 134849369 | 1473          | ENSG00000264744 | MIR3689C     |
| NR4A3_R848 | chr9    | 135091526 | 135091926 | Promoter (3-4kb)  | 9       | 135095060 | 135119654 | -3134         | ENSG00000130558 | OLFM1        |
| NR4A3_R848 | chr9    | 135551163 | 135551563 | Promoter (5-6kb)  | 9       | 135546155 | 135549946 | 5008          | ENSG00000122136 | OBP2A        |
| NR4A3_R848 | chr9    | 135774144 | 135774544 | Promoter (1-2kb)  | 9       | 135772858 | 135784858 | 1286          | ENSG00000107147 | KCNT1        |
| NR4A3_R848 | chr9    | 136234566 | 136234966 | Promoter (9-10kb) | 9       | 136211264 | 136224877 | -9689         | ENSG00000165661 | QSOX2        |
| NR4A3_R848 | chr9    | 136309919 | 136310319 | Promoter (3-4kb)  | 9       | 136281380 | 136306901 | -3018         | ENSG00000260220 | CCDC187      |
| NR4A3_R848 | chr9    | 136316103 | 136316503 | Promoter (8-9kb)  | 9       | 136322303 | 136325218 | 8715          | ENSG00000262075 | DKFZP434A062 |
| NR4A3_R848 | chr9    | 136828918 | 136829318 | Promoter (<=1kb)  | 9       | 136828472 | 136837590 | 446           | ENSG00000196642 | RABL6        |
| NR4A3_R848 | chr9    | 137465747 | 137466147 | Promoter (<=1kb)  | 9       | 137463435 | 137464820 | -927          | ENSG00000130653 | PNPLA7       |
| NR4A3_R848 | chr9    | 137466676 | 137467076 | Promoter (1-2kb)  | 9       | 137463435 | 137464820 | -1856         | ENSG00000130653 | PNPLA7       |
| NR4A3_R848 | chr10   | 337239    | 337639    | Promoter (7-8kb)  | 10      | 324639    | 329526    | -7713         | ENSG00000151240 | DIP2C        |
| NR4A3_R848 | chr10   | 379880    | 380280    | Promoter (9-10kb) | 10      | 364962    | 390016    | 9736          | ENSG00000151240 | DIP2C        |
| NR4A3_R848 | chr10   | 679502    | 679902    | Promoter (9-10kb) | 10      | 274201    | 689668    | 9766          | ENSG00000151240 | DIP2C        |
| NR4A3_R848 | chr10   | 1232447   | 1232847   | Promoter (7-8kb)  | 10      | 1215676   | 1240530   | 7683          | ENSG00000185736 | ADARB2       |
| NR4A3_R848 | chr10   | 5497341   | 5497741   | Promoter (1-2kb)  | 10      | 5498697   | 5499570   | 1829          | ENSG00000178372 | CALML5       |
| NR4A3_R848 | chr10   | 5598275   | 5598675   | Promoter (2-3kb)  | 10      | 5594991   | 5596118   | -2157         | ENSG00000242147 | LASTR        |
| NR4A3_R848 | chr10   | 6801516   | 6801916   | Promoter (6-7kb)  | 10      | 6794740   | 6841238   | 6776          | ENSG00000238266 | LINC00707    |
| NR4A3_R848 | chr10   | 11885246  | 11885646  | Promoter (9-10kb) | 10      | 11849608  | 11894700  | 9054          | ENSG00000225778 | PROSER2-AS1  |
| NR4A3_R848 | chr10   | 18555453  | 18555853  | Promoter (3-4kb)  | 10      | 18546062  | 18551822  | -3631         | ENSG00000241058 | NSUN6        |
| NR4A3_R848 | chr10   | 23010080  | 23010480  | Promoter (3-4kb)  | 10      | 23006735  | 23008374  | 3345          | ENSG00000165309 | ARMC3        |
| NR4A3_R848 | chr10   | 46267497  | 46267897  | Promoter (5-6kb)  | 10      | 46233885  | 46273557  | 5660          | NA              | ANTXRPL1     |
| NR4A3_R848 | chr10   | 69338541  | 69338941  | Promoter (<=1kb)  | 10      | 69338020  | 69386791  | 521           | ENSG00000156515 | HK1          |
| NR4A3_R848 | chr10   | 80655769  | 80656169  | Promoter (5-6kb)  | 10      | 80649797  | 80653732  | 5972          | ENSG00000231082 | LINC02655    |
| NR4A3_R848 | chr10   | 80658074  | 80658474  | Promoter (8-9kb)  | 10      | 80649797  | 80653732  | 8277          | ENSG00000231082 | LINC02655    |
| NR4A3_R848 | chr10   | 84186687  | 84187087  | Promoter (7-8kb)  | 10      | 84194537  | 84218694  | -7450         | ENSG00000148600 | CDHR1        |
| NR4A3_R848 | chr10   | 84250097  | 84250497  | Promoter (1-2kb)  | 10      | 84248951  | 84255440  | 1146          | ENSG00000148604 | RGR          |
| NR4A3_R848 | chr10   | 86373101  | 86373501  | Promoter (6-7kb)  | 10      | 85599552  | 86366795  | -6306         | ENSG00000182771 | GRID1        |
| NR4A3_R848 | chr10   | 86653885  | 86654285  | Promoter (<=1kb)  | 10      | 86654547  | 86666460  | -262          | ENSG00000122375 | OPN4         |
| NR4A3_R848 | chr10   | 100240616 | 100241016 | Promoter (3-4kb)  | 10      | 100237156 | 100237302 | -3314         | ENSG00000212464 | SNORA12      |
| NR4A3_R848 | chr10   | 101190506 | 101190906 | Promoter (8-9kb)  | 10      | 101181683 | 101194145 | 8823          | ENSG00000237579 | LINC01514    |
| NR4A3_R848 | chr10   | 103250841 | 103251293 | Promoter (4-5kb)  | 10      | 103245887 | 103248016 | 4954          | ENSG00000235376 | RPEL1        |
| NR4A3_R848 | chr10   | 104035956 | 104036368 | Promoter (1-2kb)  | 10      | 104031350 | 104034130 | -1826         | ENSG00000065618 | COL17A1      |
| NR4A3_R848 | chr10   | 114137867 | 114138267 | Promoter (5-6kb)  | 10      | 114131026 | 114132094 | -5773         | ENSG00000165813 | CCDC186      |
| NR4A3_R848 | chr10   | 119095021 | 119095421 | Promoter (8-9kb)  | 10      | 119104086 | 119105643 | -8665         | ENSG00000119979 | DENND10      |
| NR4A3_R848 | chr10   | 122561601 | 122562001 | Promoter (<=1kb)  | 10      | 122560771 | 122643736 | 830           | ENSG00000187908 | DMBT1        |
| NR4A3_R848 | chr10   | 122724687 | 122725087 | Promoter (4-5kb)  | 10      | 122729429 | 122826448 | -4342         | ENSG00000176584 | DMBT1L1      |
| NR4A3_R848 | chr10   | 124598950 | 124599350 | Promoter (5-6kb)  | 10      | 124605200 | 124613425 | -5850         | ENSG00000107902 | LHPP         |
| NR4A3_R848 | chr10   | 124610244 | 124610644 | Promoter (2-3kb)  | 10      | 124612833 | 124613384 | -2189         | ENSG00000107902 | LHPP         |
| NR4A3_R848 | chr10   | 132154828 | 132155228 | Promoter (6-7kb)  | 10      | 132161783 | 132163383 | -6555         | ENSG00000188385 | JAKMIP3      |
| NR4A3_R848 | chr10   | 132364277 | 132364689 | Promoter (<=1kb)  | 10      | 132365471 | 132367001 | -782          | ENSG00000148814 | LRRC27       |
| NR4A3_R848 | chr10   | 132392424 | 132392824 | Promoter (4-5kb)  | 10      | 132397168 | 132417528 | -4344         | ENSG00000171813 | PWWP2B       |
| NR4A3_R848 | chr10   | 132605188 | 132605588 | Promoter (2-3kb)  | 10      | 132607926 | 132777782 | -2338         | ENSG00000068383 | INPP5A       |
| NR4A3_R848 | chr10   | 132774902 | 132775302 | Promoter (9-10kb) | 10      | 132765824 | 132782405 | 9078          | ENSG00000068383 | INPP5A       |
| NR4A3_R848 | chr10   | 132820983 | 132821383 | Promoter (8-9kb)  | 10      | 132808443 | 132812804 | -8179         | ENSG00000171811 | CFAP46       |
| NR4A3_R848 | chr10   | 132822187 | 132822587 | Promoter (9-10kb) | 10      | 132808443 | 132812804 | -9383         | ENSG00000171811 | CFAP46       |
| NR4A3_R848 | chr10   | 132881914 | 132882314 | Promoter (5-6kb)  | 10      | 132872528 | 132876908 | -5006         | ENSG00000171811 | CFAP46       |
| NR4A3_R848 | chr10   | 132912184 | 132912584 | Promoter (2-3kb)  | 10      | 132908348 | 132910096 | -2088         | ENSG00000171811 | CFAP46       |
| NR4A3_R848 | chr11   | 359935    | 360335    | Promoter (9-10kb) | 11      | 369499    | 382117    | -9164         | ENSG00000182272 | B4GALNT4     |
| NR4A3_R848 | chr11   | 864329    | 864729    | Promoter (1-2kb)  | 11      | 863272    | 867111    | 1057          | ENSG00000214063 | TSPAN4       |
| NR4A3_R848 | chr11   | 881847    | 882247    | Promoter (<=1kb)  | 11      | 868399    | 883178    | 931           | ENSG00000177830 | CHID1        |
| NR4A3_R848 | chr11   | 895763    | 896163    | Promoter (6-7kb)  | 11      | 882328    | 902322    | 6159          | ENSG00000177830 | CHID1        |
| NR4A3_R848 | chr11   | 1245725   | 1246125   | Promoter (3-4kb)  | 11      | 1242261   | 1249676   | 3551          | ENSG00000255177 | MUC5B-AS1    |
| NR4A3_R848 | chr11   | 1251153   | 1251553   | Promoter (1-2kb)  | 11      | 1242261   | 1249676   | -1477         | ENSG00000255177 | MUC5B-AS1    |
| NR4A3_R848 | chr11   | 1408511   | 1408911   | Promoter (<=1kb)  | 11      | 1409400   | 1442516   | -489          | ENSG00000174672 | BRSK2        |
| NR4A3_R848 | chr11   | 1435024   | 1435424   | Promoter (5-6kb)  | 11      | 1440799   | 1461136   | -5375         | ENSG00000174672 | BRSK2        |
| NR4A3_R848 | chr11   | 1742780   | 1743180   | Promoter (5-6kb)  | 11      | 1735213   | 1749102   | 5922          | ENSG00000244242 | IFITM10      |
| NR4A3_R848 | chr11   | 1754243   | 1754643   | Promoter (<=1kb)  | 11      | 1753383   | 1754946   | 303           | ENSG00000117984 | CTSD         |
| NR4A3_R848 | chr11   | 2126850   | 2127300   | Promoter (6-7kb)  | 11      | 2134134   | 2134209   | 6909          | ENSG00000207805 | MIR483       |
| NR4A3_R848 | chr11   | 2306798   | 2307198   | Promoter (<=1kb)  | 11      | 2306945   | 2316187   | 0             | ENSG00000064201 | TSPAN32      |
| NR4A3_R848 | chr11   | 2471671   | 2472071   | Promoter (9-10kb) | 11      | 2461887   | 2527973   | 9784          | ENSG00000053918 | KCNQ1        |
| NR4A3_R848 | chr11   | 17495695  | 17496095  | Promoter (<=1kb)  | 11      | 17494162  | 17496913  | 818           | ENSG00000006611 | USH1C        |
| NR4A3_R848 | chr11   | 17534930  | 17535330  | Promoter (1-2kb)  | 11      | 17522883  | 17533874  | -1056         | ENSG00000006611 | USH1C        |
| NR4A3_R848 | chr11   | 19932063  | 19932463  | Promoter (<=1kb)  | 11      | 19931765  | 19933719  | 298           | ENSG00000166833 | NAV2         |
| NR4A3_R848 | chr11   | 35325614  | 35326014  | Promoter (8-9kb)  | 11      | 35265443  | 35317383  | -8231         | ENSG00000110436 | SLC1A2       |
| NR4A3_R848 | chr11   | 44978151  | 44978551  | Promoter (4-5kb)  | 11      | 44974143  | 44974905  | 4008          | ENSG00000254654 | LINC02685    |
| NR4A3_R848 | chr11   | 45094607  | 45095007  | Promoter (<=1kb)  | 11      | 45095806  | 45224908  | -799          | ENSG00000019485 | PRDM11       |
| NR4A3_R848 | chr11   | 47260500  | 47260900  | Promoter (<=1kb)  | 11      | 47260397  | 47268817  | 103           | ENSG00000025434 | NR1H3        |
| NR4A3_R848 | chr11   | 57231528  | 57232155  | Promoter (5-6kb)  | 11      | 57233593  | 57237201  | 5046          | ENSG00000134817 | APLNR        |
| NR4A3_R848 | chr11   | 61103407  | 61103807  | Promoter (<=1kb)  | 11      | 61102509  | 61119359  | 898           | ENSG00000110448 | CD5          |
| NR4A3_R848 | chr11   | 61673935  | 61674335  | Promoter (6-7kb)  | 11      | 61680391  | 61747001  | -6056         | ENSG00000134780 | DAGLA        |
| NR4A3_R848 | chr11   | 63019600  | 63020000  | Promoter (3-4kb)  | 11      | 62992824  | 63015841  | -3759         | ENSG00000149452 | SLC22A8      |
| NR4A3_R848 | chr11   | 63979966  | 63980366  | Promoter (5-6kb)  | 11      | 63974620  | 63988346  | 5346          | ENSG00000167770 | OTUB1        |
| NR4A3_R848 | chr11   | 65216388  | 65216788  | Promoter (2-3kb)  | 11      | 65213876  | 65242355  | 2512          | ENSG00000197847 | SLC22A20P    |
| NR4A3_R848 | chr11   | 66292862  | 66293262  | Promoter (<=1kb)  | 11      | 66291894  | 66296664  | 968           | ENSG00000179292 | TMEM151A     |
| NR4A3_R848 | chr11   | 67670062  | 67670462  | P                 |         |           |           |               |                 |              |

| Condition  | peakChr | peakStart | peakEnd   | annotation        | geneChr | geneStart | geneEnd   | distanceToTSS | geneID          | geneSymbol   |
|------------|---------|-----------|-----------|-------------------|---------|-----------|-----------|---------------|-----------------|--------------|
| NR4A3_R848 | chr11   | 108395482 | 108395882 | Promoter (9–10kb) | 11      | 108331411 | 108405483 | 9601          | ENSG00000166323 | C11orf65     |
| NR4A3_R848 | chr11   | 111358447 | 111358847 | Promoter (<=1kb)  | 11      | 111354537 | 111359406 | 559           | ENSG00000110777 | POU2AF1      |
| NR4A3_R848 | chr11   | 112254589 | 112254989 | Promoter (5–6kb)  | 11      | 112260265 | 112261396 | -5276         | ENSG00000268472 | LOC100132686 |
| NR4A3_R848 | chr11   | 112402234 | 112402634 | Promoter (9–10kb) | 11      | 112393174 | 112624567 | 9060          | ENSG00000254968 | LINC02763    |
| NR4A3_R848 | chr11   | 118103169 | 118103569 | Promoter (<=1kb)  | 11      | 118102940 | 118108867 | 229           | ENSG00000137648 | TMPRSS4      |
| NR4A3_R848 | chr11   | 118608984 | 118609384 | Promoter (1–2kb)  | 11      | 118610427 | 118627396 | -1043         | ENSG00000019144 | PHLDB1       |
| NR4A3_R848 | chr11   | 118614847 | 118615247 | Promoter (<=1kb)  | 11      | 118615585 | 118627464 | -338          | ENSG00000019144 | PHLDB1       |
| NR4A3_R848 | chr11   | 121108444 | 121108844 | Promoter (5–6kb)  | 11      | 121102666 | 121190806 | 5778          | ENSG00000109927 | TECTA        |
| NR4A3_R848 | chr11   | 126437524 | 126437924 | Promoter (2–3kb)  | 11      | 126436864 | 126440818 | 2894          | ENSG00000149571 | KIRREL3      |
| NR4A3_R848 | chr11   | 134308168 | 134308576 | Promoter (<=1kb)  | 11      | 134307192 | 134319284 | 976           | ENSG00000166105 | GLB1L3       |
| NR4A3_R848 | chr11   | 134740200 | 134740600 | Promoter (4–5kb)  | 11      | 134735596 | 134763810 | 4604          | ENSG00000251226 | LINC02714    |
| NR4A3_R848 | chr12   | 49051787  | 49052187  | Promoter (3–4kb)  | 12      | 49018975  | 49055324  | 3137          | ENSG00000167548 | KMT2D        |
| NR4A3_R848 | chr12   | 52554381  | 52554781  | Promoter (1–2kb)  | 12      | 52543909  | 52553145  | -1236         | ENSG00000139648 | KRT71        |
| NR4A3_R848 | chr12   | 53737130  | 53737530  | Promoter (9–10kb) | 12      | 53708517  | 53727745  | -9385         | ENSG00000012822 | CALCOCO1     |
| NR4A3_R848 | chr12   | 54564376  | 54564776  | Promoter (2–3kb)  | 12      | 54561501  | 54579239  | 2875          | ENSG00000123360 | PDE1B        |
| NR4A3_R848 | chr12   | 56176525  | 56176925  | Promoter (1–2kb)  | 12      | 56174531  | 56178631  | 1706          | ENSG00000139613 | SMARCC2      |
| NR4A3_R848 | chr12   | 56415555  | 56415955  | Promoter (5–6kb)  | 12      | 56418290  | 56421090  | 5135          | ENSG00000111602 | TIMELESS     |
| NR4A3_R848 | chr12   | 57191713  | 57192113  | Promoter (2–3kb)  | 12      | 57194504  | 57194576  | -2391         | ENSG00000221365 | MIR1228      |
| NR4A3_R848 | chr12   | 57423657  | 57424057  | Promoter (6–7kb)  | 12      | 57310340  | 57430790  | 6733          | ENSG00000179912 | R3HDM2       |
| NR4A3_R848 | chr12   | 69703641  | 69704041  | Promoter (4–5kb)  | 12      | 69683239  | 69699476  | -4165         | ENSG00000127325 | BEST3        |
| NR4A3_R848 | chr12   | 109768199 | 109768599 | Promoter (4–5kb)  | 12      | 109734323 | 109773485 | 4886          | ENSG00000255650 | FAM222A-AS1  |
| NR4A3_R848 | chr12   | 109808543 | 109808943 | Promoter (5–6kb)  | 12      | 109783621 | 109814796 | 5853          | ENSG00000111199 | TRPV4        |
| NR4A3_R848 | chr12   | 109809307 | 109809707 | Promoter (5–6kb)  | 12      | 109783621 | 109814796 | 5089          | ENSG00000111199 | TRPV4        |
| NR4A3_R848 | chr12   | 110930274 | 110930674 | Promoter (3–4kb)  | 12      | 110934590 | 110937451 | -3916         | ENSG00000185847 | LINC01405    |
| NR4A3_R848 | chr12   | 111099988 | 111100388 | Promoter (<=1kb)  | 12      | 111099446 | 111295346 | 542           | ENSG00000111249 | CUX2         |
| NR4A3_R848 | chr12   | 112447537 | 112447937 | Promoter (5–6kb)  | 12      | 112453329 | 112457486 | -5392         | ENSG00000179295 | PTPN11       |
| NR4A3_R848 | chr12   | 112574610 | 112575175 | Promoter (<=1kb)  | 12      | 112575027 | 112865465 | 0             | ENSG00000089169 | RPH3A        |
| NR4A3_R848 | chr12   | 117321778 | 117322178 | Promoter (8–9kb)  | 12      | 117215259 | 117331074 | 8896          | ENSG00000089250 | NOS1         |
| NR4A3_R848 | chr12   | 121750473 | 121750873 | Promoter (1–2kb)  | 12      | 121752129 | 121776158 | -1256         | ENSG00000188735 | TMEM120B     |
| NR4A3_R848 | chr12   | 123074371 | 123074771 | Promoter (1–2kb)  | 12      | 123034545 | 123076095 | 1324          | ENSG00000090975 | PITPNM2      |
| NR4A3_R848 | chr12   | 123510787 | 123511453 | Promoter (2–3kb)  | 12      | 123472068 | 123514428 | 2975          | ENSG00000188026 | RILPL1       |
| NR4A3_R848 | chr12   | 124430993 | 124431393 | Promoter (<=1kb)  | 12      | 124429395 | 124430641 | -352          | ENSG00000196498 | NCOR2        |
| NR4A3_R848 | chr12   | 124479351 | 124479751 | Promoter (4–5kb)  | 12      | 124430641 | 124483769 | 4018          | ENSG00000196498 | NCOR2        |
| NR4A3_R848 | chr12   | 124541277 | 124541677 | Promoter (5–6kb)  | 12      | 124324598 | 124535603 | -5674         | ENSG00000196498 | NCOR2        |
| NR4A3_R848 | chr12   | 124891922 | 124892322 | Promoter (9–10kb) | 12      | 124814964 | 124882668 | -9254         | ENSG00000073060 | SCARB1       |
| NR4A3_R848 | chr12   | 125089619 | 125090295 | Promoter (<=1kb)  | 12      | 125091013 | 125107154 | -718          | ENSG00000081760 | AACS         |
| NR4A3_R848 | chr12   | 125190114 | 125190514 | Promoter (3–4kb)  | 12      | 125186836 | 125349978 | 3278          | ENSG00000139364 | TMEM132B     |
| NR4A3_R848 | chr12   | 130409075 | 130409475 | Promoter (1–2kb)  | 12      | 130397310 | 130407830 | -1245         | ENSG00000060709 | RIMBP2       |
| NR4A3_R848 | chr12   | 131853401 | 131853801 | Promoter (3–4kb)  | 12      | 131849835 | 131851332 | 3566          | ENSG00000198598 | MMP17        |
| NR4A3_R848 | chr12   | 131918665 | 131919065 | Promoter (<=1kb)  | 12      | 131919241 | 131921951 | -176          | ENSG00000177169 | ULK1         |
| NR4A3_R848 | chr13   | 24681773  | 24682173  | Promoter (1–2kb)  | 13      | 24680577  | 24712493  | 1196          | ENSG00000075673 | ATP12A       |
| NR4A3_R848 | chr13   | 40536065  | 40536465  | Promoter (<=1kb)  | 13      | 40458903  | 40535807  | -258          | ENSG00000215483 | LINC00598    |
| NR4A3_R848 | chr13   | 48967893  | 48968293  | Promoter (7–8kb)  | 13      | 48975912  | 49209779  | -7619         | ENSG00000102531 | FNDC3A       |
| NR4A3_R848 | chr13   | 57172806  | 57173206  | Promoter (5–6kb)  | 13      | 57167197  | 57170218  | 5609          | ENSG00000234278 | PRR20E       |
| NR4A3_R848 | chr13   | 110043462 | 110044115 | Promoter (9–10kb) | 13      | 110053285 | 110054952 | -9170         | ENSG00000231428 | LINC00396    |
| NR4A3_R848 | chr13   | 113056479 | 113056879 | Promoter (7–8kb)  | 13      | 113064312 | 113070394 | -7433         | ENSG00000126217 | MCF2L        |
| NR4A3_R848 | chr13   | 113058657 | 113059057 | Promoter (5–6kb)  | 13      | 113064312 | 113070394 | -5255         | ENSG00000126217 | MCF2L        |
| NR4A3_R848 | chr13   | 113090862 | 113091262 | Promoter (<=1kb)  | 13      | 113090969 | 113094859 | 0             | ENSG00000126217 | MCF2L        |
| NR4A3_R848 | chr13   | 113108995 | 113109395 | Promoter (<=1kb)  | 13      | 113110340 | 113116835 | -945          | ENSG00000057593 | F7           |
| NR4A3_R848 | chr13   | 113774486 | 113774886 | Promoter (6–7kb)  | 13      | 113768136 | 113799857 | 6350          | ENSG00000184497 | TMEM255B     |
| NR4A3_R848 | chr13   | 113798466 | 113798866 | Promoter (1–2kb)  | 13      | 113799888 | 113804890 | -1022         | ENSG00000184497 | TMEM255B     |
| NR4A3_R848 | chr14   | 32484373  | 32485033  | Promoter (9–10kb) | 14      | 32494271  | 32545455  | -9238         | ENSG00000151320 | AKAP6        |
| NR4A3_R848 | chr14   | 64559809  | 64560209  | Promoter (9–10kb) | 14      | 64550209  | 64568447  | 9600          | ENSG00000165807 | PPP1R36      |
| NR4A3_R848 | chr14   | 64765731  | 64766131  | Promoter (1–2kb)  | 14      | 64749163  | 64763840  | -1891         | ENSG00000070182 | SPTB         |
| NR4A3_R848 | chr14   | 78242627  | 78243027  | Promoter (<=1kb)  | 14      | 78243037  | 79862445  | -10           | ENSG00000021645 | NRXN3        |
| NR4A3_R848 | chr14   | 89938416  | 89938816  | Promoter (5–6kb)  | 14      | 89848433  | 89932594  | -5822         | ENSG00000140025 | EFCAB11      |
| NR4A3_R848 | chr14   | 91221476  | 91221876  | Promoter (5–6kb)  | 14      | 91215857  | 91224822  | 5619          | ENSG00000133943 | DGLUCY       |
| NR4A3_R848 | chr14   | 91292976  | 91293695  | Promoter (1–2kb)  | 14      | 91288732  | 91291071  | -1905         | ENSG00000015133 | CCDC88C      |
| NR4A3_R848 | chr14   | 95660938  | 95661338  | Promoter (1–2kb)  | 14      | 95663256  | 95671850  | -1918         | NA              | TCL6         |
| NR4A3_R848 | chr14   | 96479060  | 96479460  | Promoter (3–4kb)  | 14      | 96482982  | 96488275  | -3522         | ENSG00000140057 | AK7          |
| NR4A3_R848 | chr14   | 100526705 | 100527105 | Promoter (<=1kb)  | 14      | 100525946 | 100529624 | 759           | ENSG00000176473 | WDR25        |
| NR4A3_R848 | chr14   | 100895859 | 100896259 | Promoter (<=1kb)  | 14      | 100894964 | 100967053 | 895           | NA              | MEG8         |
| NR4A3_R848 | chr14   | 101020217 | 101020617 | Promoter (1–2kb)  | 14      | 101022066 | 101022132 | -1449         | ENSG00000199088 | MIR379       |
| NR4A3_R848 | chr14   | 101130108 | 101130508 | Promoter (9–10kb) | 14      | 101120840 | 101123545 | 9268          | ENSG00000259004 | LINC02285    |
| NR4A3_R848 | chr14   | 101548594 | 101548994 | Promoter (6–7kb)  | 14      | 101552223 | 101555676 | 6682          | ENSG00000258498 | DIO3OS       |
| NR4A3_R848 | chr14   | 101550248 | 101550648 | Promoter (5–6kb)  | 14      | 101552223 | 101555676 | 5012          | ENSG00000258498 | DIO3OS       |
| NR4A3_R848 | chr14   | 102920424 | 102920824 | Promoter (1–2kb)  | 14      | 102922656 | 102931192 | -1832         | ENSG00000166126 | AMN          |
| NR4A3_R848 | chr14   | 104089761 | 104090161 | Promoter (3–4kb)  | 14      | 104093491 | 104105382 | -3330         | ENSG00000166183 | ASPG         |
| NR4A3_R848 | chr14   | 104685535 | 104685935 | Promoter (3–4kb)  | 14      | 104689606 | 104722535 | -3671         | ENSG00000203485 | INF2         |
| NR4A3_R848 | chr14   | 104822797 | 104823197 | Promoter (1–2kb)  | 14      | 104821201 | 104823718 | 1596          | ENSG00000258701 | LINC00638    |
| NR4A3_R848 | chr14   | 104824392 | 104824792 | Promoter (3–4kb)  | 14      | 104821201 | 104823718 | 3191          | ENSG00000258701 | LINC00638    |
| NR4A3_R848 | chr14   | 104859201 | 104859601 | Promoter (5–6kb)  | 14      | 104865268 | 104896747 | -5667         | ENSG00000099814 | CEP170B      |
| NR4A3_R848 | chr14   | 104860129 | 104860529 | Promoter (4–5kb)  | 14      | 104865268 | 104896747 | -4739         | ENSG00000099814 | CEP170B      |
| NR4A3_R848 | chr14   | 104860703 | 104861103 | Promoter (4–5kb)  | 14      | 104865268 | 104896747 | -4165         | ENSG00000099814 | CEP170B      |
| NR4A3_R848 | chr14   | 105083219 | 105083619 | Promoter (9–10kb) | 14      | 105093609 | 105095699 | -9990         | NA              | LINC02298    |
| NR4A3_R848 | chr14   | 105295861 | 105296261 | Promoter (4–5kb)  | 14      | 105226123 | 105300468 | 4207          | ENSG00000185024 | BRF1         |
| NR4A3_R848 | chr14   | 105496799 | 105497199 | Promoter (<=1kb)  | 14      | 105497626 | 105499229 | -427          | ENSG00000185347 | TEDC1        |
| NR4A3_R848 | chr15   | 25178032  | 25178432  | Promoter (<=1kb)  | 15      | 25178738  | 25178819  | -306          | ENSG00000200503 | SNORD115-5   |
| NR4A3_R848 | chr15   | 28104800  | 28105200  | Promoter (5–6kb)  | 15      | 27754875  | 28099315  | -5485         | ENSG00000104044 | OCA2         |
| NR4A3_R848 | chr15   | 41561990  | 41562390  | Promoter (2–3kb)  | 15      | 41564784  | 41568265  | -2394         | ENSG00000092445 | TYRO3        |
| NR4A3_R848 | chr15   | 59610066  | 59610466  | Promoter (1–2kb)  | 15      | 59611783  | 59622723  | -1317         | ENSG00000140297 | GCNT3        |
| NR4A3_R848 | chr15   | 63925520  | 63925920  | Promoter (<=1kb)  | 15      | 63924512  | 63926074  | 154           | ENSG00000035664 | DAPK2        |
| NR4A3_R848 | chr15   | 67052460  | 67052860  | Promoter (6–7kb)  | 15      | 66984108  | 67059253  | 6393          | NA              | LOC102723493 |
| NR4A3_R848 | chr15   | 69832058  | 69832458  | Promoter (2–3kb)  | 15      | 69835193  | 69842964  | -2735         | ENSG00000245750 | LINC00593    |
| NR4A3_R848 | chr15   | 72311401  | 72311801  | Promoter (5–6kb)  | 15      | 72285905  | 72306315  | -5086         | ENSG00000140488 | CELF6        |
| NR4A3_R848 | chr15   | 73709044  | 73709444  | Promoter (<=1kb)  | 15      | 73709565  | 73714053  | -121          | ENSG00000103855 | CD276        |
| NR4A3_R848 | chr15   | 74704188  | 74704588  | Promoter (7–8kb)  | 15      | 74656020  | 74696292  | -7896         | ENSG00000179151 | EDC3         |
| NR4A3_R848 | chr15   | 74728069  | 74728469  | Promoter (2–3kb)  | 15      | 74719542  | 74725536  | -2533         | ENSG00000140465 | CYP1A1       |
| NR4A3_R848 | chr15   | 77699486  | 77699886  | Promoter (2–3kb)  | 15      | 77615722  | 77696495  | -2991         | ENSG00000169783 | LINGO1       |
| NR4A3_R848 | chr15   | 78992943  | 78993343  | Promoter (4–5kb)  | 15      | 78991712  | 78998071  | 4728          | ENSG00000058335 | RASGRF1      |
| NR4A3_R848 | chr15   | 83019826  | 83020226  | Promoter (8–9kb)  | 15      | 83005279  | 83011641  | -8185         |                 |              |



| Condition  | peakChr | peakStart | peakEnd  | annotation        | geneChr | geneStart | geneEnd  | distanceToTSS | geneID          | geneSymbol    |
|------------|---------|-----------|----------|-------------------|---------|-----------|----------|---------------|-----------------|---------------|
| NR4A3_R848 | chr16   | 10859239  | 10859639 | Promoter (6-7kb)  | 16      | 10866222  | 10902104 | -6583         | ENSG00000179583 | CIITA         |
| NR4A3_R848 | chr16   | 19874597  | 19874997 | Promoter (1-2kb)  | 16      | 19858498  | 19872845 | -1752         | ENSG00000167191 | GPRC5B        |
| NR4A3_R848 | chr16   | 28850530  | 28850930 | Promoter (3-4kb)  | 16      | 28846689  | 28874205 | 3841          | ENSG00000178188 | SH2B1         |
| NR4A3_R848 | chr16   | 30045350  | 30045750 | Promoter (7-8kb)  | 16      | 30035423  | 30052923 | 7173          | ENSG00000149926 | TLCD3B        |
| NR4A3_R848 | chr16   | 33337685  | 33338342 | Promoter (7-8kb)  | 16      | 33206431  | 33330342 | -7343         | NA              | LOC105369266  |
| NR4A3_R848 | chr16   | 33338574  | 33338974 | Promoter (8-9kb)  | 16      | 33206431  | 33330342 | -8232         | NA              | LOC105369266  |
| NR4A3_R848 | chr16   | 33339619  | 33340019 | Promoter (9-10kb) | 16      | 33206431  | 33330342 | -9277         | NA              | LOC105369266  |
| NR4A3_R848 | chr16   | 46915396  | 46915796 | Promoter (<=1kb)  | 16      | 46915298  | 46929007 | 98            | ENSG00000166123 | GPT2          |
| NR4A3_R848 | chr16   | 46915896  | 46916296 | Promoter (<=1kb)  | 16      | 46915298  | 46929007 | 598           | ENSG00000166123 | GPT2          |
| NR4A3_R848 | chr16   | 47854645  | 47855045 | Promoter (3-4kb)  | 16      | 47858579  | 47908431 | -3534         | ENSG00000261231 | LINC02133     |
| NR4A3_R848 | chr16   | 50555756  | 50556156 | Promoter (7-8kb)  | 16      | 50548396  | 50649249 | 7360          | ENSG00000140807 | NKD1          |
| NR4A3_R848 | chr16   | 57515794  | 57516194 | Promoter (<=1kb)  | 16      | 57512387  | 57516582 | 388           | ENSG00000135736 | CCDC102A      |
| NR4A3_R848 | chr16   | 57568787  | 57569387 | Promoter (5-6kb)  | 16      | 57574816  | 57591681 | -5429         | ENSG00000159618 | ADGRG5        |
| NR4A3_R848 | chr16   | 57705344  | 57705744 | Promoter (<=1kb)  | 16      | 57704907  | 57707861 | 437           | ENSG00000159625 | DRC7          |
| NR4A3_R848 | chr16   | 57706071  | 57706471 | Promoter (1-2kb)  | 16      | 57704907  | 57707861 | 1164          | ENSG00000159625 | DRC7          |
| NR4A3_R848 | chr16   | 57728986  | 57729386 | Promoter (3-4kb)  | 16      | 57725474  | 57731453 | 3512          | ENSG00000159625 | DRC7          |
| NR4A3_R848 | chr16   | 57934545  | 57934945 | Promoter (4-5kb)  | 16      | 57923113  | 57939549 | 4604          | ENSG00000070729 | CNGB1         |
| NR4A3_R848 | chr16   | 66379770  | 66380170 | Promoter (<=1kb)  | 16      | 66379225  | 66392985 | 545           | ENSG00000179776 | CDH5          |
| NR4A3_R848 | chr16   | 67273575  | 67273975 | Promoter (3-4kb)  | 16      | 67277510  | 67289479 | -3535         | ENSG00000196155 | PLEKHG4       |
| NR4A3_R848 | chr16   | 70644634  | 70645034 | Promoter (1-2kb)  | 16      | 70646563  | 70656671 | -1529         | ENSG00000157368 | IL34          |
| NR4A3_R848 | chr16   | 71625194  | 71625594 | Promoter (<=1kb)  | 16      | 71626161  | 71629680 | -567          | ENSG00000140832 | MARVELD3      |
| NR4A3_R848 | chr16   | 79722763  | 79723163 | Promoter (8-9kb)  | 16      | 79713847  | 79799090 | 8916          | ENSG00000260876 | LINC01229     |
| NR4A3_R848 | chr16   | 79796382  | 79796782 | Promoter (<=1kb)  | 16      | 79796184  | 79801341 | 198           | ENSG00000260876 | LINC01229     |
| NR4A3_R848 | chr16   | 81215573  | 81215973 | Promoter (4-5kb)  | 16      | 81101123  | 81220370 | 4397          | ENSG00000166473 | PKD1L2        |
| NR4A3_R848 | chr16   | 81614944  | 81615344 | Promoter (3-4kb)  | 16      | 81611348  | 81611408 | 3596          | ENSG00000275109 | MIR6504       |
| NR4A3_R848 | chr16   | 83508056  | 83508456 | Promoter (<=1kb)  | 16      | 83508346  | 83508408 | 0             | ENSG00000263785 | MIR3182       |
| NR4A3_R848 | chr16   | 83801665  | 83802065 | Promoter (1-2kb)  | 16      | 83789967  | 83803528 | 1463          | ENSG00000260228 | LOC102724163  |
| NR4A3_R848 | chr16   | 84125343  | 84125743 | Promoter (8-9kb)  | 16      | 84053763  | 84116942 | -8401         | ENSG00000140943 | MBTPS1        |
| NR4A3_R848 | chr16   | 86587415  | 86587815 | Promoter (8-9kb)  | 16      | 86578506  | 86582160 | 8909          | ENSG00000176678 | FOXL1         |
| NR4A3_R848 | chr16   | 87210119  | 87210519 | Promoter (1-2kb)  | 16      | 87212122  | 87226430 | -1603         | ENSG00000261095 | LOC101928708  |
| NR4A3_R848 | chr16   | 87221941  | 87222546 | Promoter (9-10kb) | 16      | 87212122  | 87226430 | 9819          | ENSG00000261095 | LOC101928708  |
| NR4A3_R848 | chr16   | 87502271  | 87502671 | Promoter (8-9kb)  | 16      | 87494187  | 87515635 | 8084          | ENSG00000288568 | LOC101928737  |
| NR4A3_R848 | chr16   | 88192887  | 88193359 | Promoter (<=1kb)  | 16      | 88194281  | 88195217 | -922          | ENSG00000260420 | LINC02182     |
| NR4A3_R848 | chr16   | 89907296  | 89907696 | Promoter (1-2kb)  | 16      | 89906157  | 89918233 | 1139          | ENSG00000141002 | TCF25         |
| NR4A3_R848 | chr17   | 3924936   | 3925336  | Promoter (3-4kb)  | 17      | 3925047   | 3928620  | 3284          | ENSG00000074370 | ATP2A3        |
| NR4A3_R848 | chr17   | 6436713   | 6437113  | Promoter (1-2kb)  | 17      | 6423738   | 6435199  | -1514         | ENSG00000129221 | AIPL1         |
| NR4A3_R848 | chr17   | 6482854   | 6483254  | Promoter (1-2kb)  | 17      | 6455400   | 6481829  | -1025         | ENSG00000091622 | PITPNM3       |
| NR4A3_R848 | chr17   | 7192129   | 7192529  | Promoter (<=1kb)  | 17      | 7189890   | 7192235  | 0             | ENSG00000132535 | DLG4          |
| NR4A3_R848 | chr17   | 9816613   | 9817013  | Promoter (5-6kb)  | 17      | 9802386   | 9822071  | 5058          | ENSG00000214978 | GSG1L2        |
| NR4A3_R848 | chr17   | 10846659  | 10847059 | Promoter (8-9kb)  | 17      | 10794906  | 10838094 | -8565         | ENSG00000263429 | TMEM238L      |
| NR4A3_R848 | chr17   | 15465383  | 15465783 | Promoter (1-2kb)  | 17      | 15436015  | 15467621 | 1838          | ENSG00000239704 | CDRT4         |
| NR4A3_R848 | chr17   | 16456006  | 16456533 | Promoter (7-8kb)  | 17      | 16441577  | 16448294 | -7712         | ENSG00000181350 | LRRC75A       |
| NR4A3_R848 | chr17   | 17789395  | 17789795 | Promoter (7-8kb)  | 17      | 17782132  | 17795776 | 7263          | ENSG00000108557 | RAI1          |
| NR4A3_R848 | chr17   | 17799994  | 17800394 | Promoter (1-2kb)  | 17      | 17798384  | 17804114 | 1610          | ENSG00000108557 | RAI1          |
| NR4A3_R848 | chr17   | 20868700  | 20869100 | Promoter (<=1kb)  | 17      | 20868547  | 20932818 | 153           | ENSG00000233098 | CCDC144NL-AS1 |
| NR4A3_R848 | chr17   | 21301684  | 21302084 | Promoter (9-10kb) | 17      | 21311687  | 21314432 | -9603         | ENSG00000034152 | MAP2K3        |
| NR4A3_R848 | chr17   | 21407159  | 21407559 | Promoter (2-3kb)  | 17      | 21405136  | 21417170 | 2023          | ENSG00000184185 | KCNJ12        |
| NR4A3_R848 | chr17   | 22091161  | 22091561 | Promoter (<=1kb)  | 17      | 22090743  | 22205151 | 418           | ENSG00000263563 | UBBP4         |
| NR4A3_R848 | chr17   | 22401316  | 22401716 | Promoter (4-5kb)  | 17      | 22406019  | 22413744 | -4303         | ENSG00000276399 | FLJ36000      |
| NR4A3_R848 | chr17   | 22521236  | 22521660 | Promoter (1-2kb)  | 17      | 22523111  | 22524663 | -1451         | ENSG00000256618 | MTRNR2L1      |
| NR4A3_R848 | chr17   | 28812985  | 28813385 | Promoter (<=1kb)  | 17      | 28757390  | 28812435 | -550          | ENSG00000173065 | FAM222B       |
| NR4A3_R848 | chr17   | 29755947  | 29756347 | Promoter (5-6kb)  | 17      | 29673840  | 29761390 | 5043          | ENSG00000141298 | SSH2          |
| NR4A3_R848 | chr17   | 38892472  | 38892872 | Promoter (2-3kb)  | 17      | 38890234  | 38915129 | 2238          | ENSG00000002834 | LASP1         |
| NR4A3_R848 | chr17   | 41632688  | 41633088 | Promoter (1-2kb)  | 17      | 41626536  | 41634106 | 1018          | ENSG00000214514 | KRT42P        |
| NR4A3_R848 | chr17   | 41736051  | 41736451 | Promoter (1-2kb)  | 17      | 41722640  | 41734644 | -1407         | ENSG00000173805 | HAP1          |
| NR4A3_R848 | chr17   | 42028060  | 42028460 | Promoter (<=1kb)  | 17      | 42025576  | 42028131 | 0             | ENSG00000187595 | ZNF385C       |
| NR4A3_R848 | chr17   | 42221881  | 42222281 | Promoter (4-5kb)  | 17      | 42210417  | 42217871 | -4010         | ENSG00000173757 | STAT5B        |
| NR4A3_R848 | chr17   | 44253630  | 44254030 | Promoter (8-9kb)  | 17      | 44260404  | 44262066 | 8036          | ENSG00000004939 | SLC4A1        |
| NR4A3_R848 | chr17   | 47699379  | 47699779 | Promoter (3-4kb)  | 17      | 47695685  | 47711490 | 3694          | ENSG00000198933 | TBKBP1        |
| NR4A3_R848 | chr17   | 64411082  | 64411482 | Promoter (2-3kb)  | 17      | 64375051  | 64413776 | 2294          | ENSG00000261371 | PECAM1        |
| NR4A3_R848 | chr17   | 74732448  | 74732848 | Promoter (3-4kb)  | 17      | 74736598  | 74746192 | -3750         | ENSG00000172794 | RAB37         |
| NR4A3_R848 | chr17   | 74734721  | 74735121 | Promoter (1-2kb)  | 17      | 74736598  | 74746192 | -1477         | ENSG00000172794 | RAB37         |
| NR4A3_R848 | chr17   | 76947235  | 76947635 | Promoter (<=1kb)  | 17      | 76946250  | 76950393 | 985           | ENSG00000167889 | MGAT5B        |
| NR4A3_R848 | chr17   | 77484817  | 77485217 | Promoter (2-3kb)  | 17      | 77481913  | 77488788 | 2904          | ENSG00000184640 | SEPTIN9       |
| NR4A3_R848 | chr17   | 77735811  | 77736211 | Promoter (7-8kb)  | 17      | 77722872  | 77728559 | -7252         | ENSG00000267790 | LINC01987     |
| NR4A3_R848 | chr17   | 78477848  | 78478248 | Promoter (5-6kb)  | 17      | 78423697  | 78427274 | -5074         | ENSG00000187775 | DNAH17        |
| NR4A3_R848 | chr17   | 79174069  | 79174469 | Promoter (9-10kb) | 17      | 79115698  | 79183472 | 9003          | ENSG00000167281 | RBFOX3        |
| NR4A3_R848 | chr17   | 79477356  | 79477756 | Promoter (4-5kb)  | 17      | 79089345  | 79482598 | 4842          | ENSG00000167281 | RBFOX3        |
| NR4A3_R848 | chr17   | 79699336  | 79699736 | Promoter (7-8kb)  | 17      | 79707176  | 79707249 | 7513          | ENSG00000266665 | MIR4739       |
| NR4A3_R848 | chr17   | 80747657  | 80748057 | Promoter (4-5kb)  | 17      | 80743287  | 80966371 | 4370          | ENSG00000141564 | RPTOR         |
| NR4A3_R848 | chr17   | 80930132  | 80930532 | Promoter (7-8kb)  | 17      | 80922724  | 80924172 | 7408          | ENSG00000141564 | RPTOR         |
| NR4A3_R848 | chr17   | 81078446  | 81078846 | Promoter (4-5kb)  | 17      | 81082989  | 81086464 | -4143         | ENSG00000175866 | BAIAP2        |
| NR4A3_R848 | chr17   | 81170019  | 81170419 | Promoter (3-4kb)  | 17      | 81117295  | 81166221 | -3798         | ENSG00000181409 | AATK          |
| NR4A3_R848 | chr17   | 81249325  | 81249725 | Promoter (1-2kb)  | 17      | 81245004  | 81247635 | -1690         | ENSG00000157637 | SLC38A10      |
| NR4A3_R848 | chr17   | 81457423  | 81457823 | Promoter (1-2kb)  | 17      | 81456158  | 81458361 | 1265          | ENSG00000266074 | BAHCC1        |
| NR4A3_R848 | chr17   | 81661384  | 81661784 | Promoter (1-2kb)  | 17      | 81650740  | 81663104 | 1320          | ENSG00000185527 | PDE6G         |
| NR4A3_R848 | chr17   | 81985049  | 81985449 | Promoter (6-7kb)  | 17      | 81978186  | 82017406 | 6863          | ENSG00000169696 | ASPSCR1       |
| NR4A3_R848 | chr17   | 82148842  | 82149242 | Promoter (2-3kb)  | 17      | 82135112  | 82151606 | 2364          | ENSG00000176155 | CCDC57        |
| NR4A3_R848 | chr17   | 82593281  | 82593681 | Promoter (<=1kb)  | 17      | 82593400  | 82601530 | 0             | ENSG00000141564 | FOXP2         |
| NR4A3_R848 | chr18   | 107957    | 108387   | Promoter (<=1kb)  | 18      | 109065    | 122219   | -678          | ENSG00000263006 | ROCK1P1       |
| NR4A3_R848 | chr18   | 110202    | 110613   | Promoter (1-2kb)  | 18      | 109065    | 122219   | 1137          | ENSG00000263006 | ROCK1P1       |
| NR4A3_R848 | chr18   | 10756043  | 10756443 | Promoter (3-4kb)  | 18      | 10759584  | 10759649 | 3206          | ENSG00000274838 | MIR6788       |
| NR4A3_R848 | chr18   | 10756931  | 10757331 | Promoter (2-3kb)  | 18      | 10759584  | 10759649 | 2318          | ENSG00000274838 | MIR6788       |
| NR4A3_R848 | chr18   | 12430631  | 12431031 | Promoter (1-2kb)  | 18      | 12432897  | 12437635 | -1866         | NA              | LOC105371998  |
| NR4A3_R848 | chr18   | 14172109  | 14172509 | Promoter (6-7kb)  | 18      | 14179097  | 14185401 | -6588         | NA              | ANKRD20A5P    |
| NR4A3_R848 | chr18   | 23669207  | 23669607 | Promoter (6-7kb)  | 18      | 23598926  | 23662911 | -6296         | ENSG00000154065 | ANKRD29       |
| NR4A3_R848 | chr18   | 26593632  | 26594032 | Promoter (2-3kb)  | 18      | 26591467  | 26591535 | -2097         | ENSG00000276221 | MIR8057       |
| NR4A3_R848 | chr18   | 46557134  | 46557534 | Promoter (<=1kb)  | 18      | 46476972  | 46556769 | -365          | ENSG00000167210 | LOXHD1        |
| NR4A3_R848 | chr18   | 47937906  | 47938306 | Promoter (6-7kb)  | 18      | 47833096  | 47931146 | -6760         | ENSG00000175387 | SMAD2         |
| NR4A3_R848 | chr18   | 49019480  | 49019880 | Promoter (3-4kb)  | 18      | 49023703  | 49048474 | -3823         | ENSG00000264269 | LOC100129878  |
| NR4A3_R848 | chr18   | 62711923  | 62712323 | Promoter (3-4kb)  | 18      | 62715541  | 62980433 | -3218         | ENSG00000081913 | PHLPP1        |
| NR4A3_R848 | chr18   | 77018668  | 77019068 | Promoter (<=1kb)  | 18      | 76989979  | 77017778 | -890          | ENSG00000197971 | MBP           |
| NR4A3_R848 | chr18   | 79865181  | 79865581 | Promoter (1-2kb)  |         |           |          |               |                 |               |

| Condition  | peakChr | peakStart | peakEnd  | annotation        | geneChr | geneStart | geneEnd  | distanceToTSS | geneID          | geneSymbol   |
|------------|---------|-----------|----------|-------------------|---------|-----------|----------|---------------|-----------------|--------------|
| NR4A3_R848 | chr19   | 2026405   | 2026805  | Promoter (8-9kb)  | 19      | 1993155   | 2034872  | 8067          | ENSG00000133243 | BTBD2        |
| NR4A3_R848 | chr19   | 2103934   | 2104334  | Promoter (5-6kb)  | 19      | 2098902   | 2099588  | 5032          | ENSG00000099840 | IZUMO4       |
| NR4A3_R848 | chr19   | 2107597   | 2107997  | Promoter (2-3kb)  | 19      | 2102237   | 2110805  | 2808          | ENSG00000065000 | AP3D1        |
| NR4A3_R848 | chr19   | 3235429   | 3235829  | Promoter (9-10kb) | 19      | 3225485   | 3297016  | 9944          | ENSG00000161082 | CELF5        |
| NR4A3_R848 | chr19   | 3310164   | 3310564  | Promoter (3-4kb)  | 19      | 3314403   | 3469217  | -3839         | ENSG00000141905 | NFIC         |
| NR4A3_R848 | chr19   | 3477307   | 3477855  | Promoter (<=1kb)  | 19      | 3474407   | 3478488  | 633           | ENSG00000095932 | SMIM24       |
| NR4A3_R848 | chr19   | 3530276   | 3530676  | Promoter (1-2kb)  | 19      | 3532483   | 3533748  | -1807         | ENSG00000105325 | FZR1         |
| NR4A3_R848 | chr19   | 3605285   | 3605685  | Promoter (<=1kb)  | 19      | 3594780   | 3606660  | 975           | ENSG00000066638 | TBXA2R       |
| NR4A3_R848 | chr19   | 3666469   | 3666869  | Promoter (<=1kb)  | 19      | 3661930   | 3667344  | 475           | ENSG00000186111 | PIP5K1C      |
| NR4A3_R848 | chr19   | 3776509   | 3776909  | Promoter (4-5kb)  | 19      | 3769089   | 3772221  | -4288         | ENSG00000173976 | RAX2         |
| NR4A3_R848 | chr19   | 3867911   | 3868311  | Promoter (<=1kb)  | 19      | 3851805   | 3869015  | 704           | ENSG00000105278 | ZFR2         |
| NR4A3_R848 | chr19   | 3923668   | 3924068  | Promoter (9-10kb) | 19      | 3933103   | 3942414  | -9035         | ENSG00000077009 | NMRK2        |
| NR4A3_R848 | chr19   | 4360247   | 4360647  | Promoter (5-6kb)  | 19      | 4354949   | 4360079  | 5298          | ENSG0000008382  | MPND         |
| NR4A3_R848 | chr19   | 4491972   | 4492372  | Promoter (3-4kb)  | 19      | 4496333   | 4502104  | -3961         | ENSG00000167674 | HDGFL2       |
| NR4A3_R848 | chr19   | 4492895   | 4493472  | Promoter (2-3kb)  | 19      | 4496333   | 4502104  | -2861         | ENSG00000167674 | HDGFL2       |
| NR4A3_R848 | chr19   | 4500306   | 4500706  | Promoter (<=1kb)  | 19      | 4499629   | 4501578  | 677           | ENSG00000167674 | HDGFL2       |
| NR4A3_R848 | chr19   | 4553032   | 4553432  | Promoter (5-6kb)  | 19      | 4542914   | 4558457  | 5025          | ENSG00000167680 | SEMA6B       |
| NR4A3_R848 | chr19   | 5672203   | 5672603  | Promoter (2-3kb)  | 19      | 5674947   | 5691667  | -2344         | ENSG00000130255 | RPL36        |
| NR4A3_R848 | chr19   | 5762399   | 5762799  | Promoter (8-9kb)  | 19      | 5753511   | 5778734  | 8888          | ENSG00000174898 | CATSPERD     |
| NR4A3_R848 | chr19   | 5817309   | 5817709  | Promoter (6-7kb)  | 19      | 5823802   | 5828324  | -6093         | ENSG00000171119 | NRTN         |
| NR4A3_R848 | chr19   | 6710093   | 6710744  | Promoter (<=1kb)  | 19      | 6709756   | 6710957  | 213           | ENSG00000125730 | C3           |
| NR4A3_R848 | chr19   | 6732171   | 6732571  | Promoter (<=1kb)  | 19      | 6730068   | 6732337  | 0             | ENSG00000125734 | GPR108       |
| NR4A3_R848 | chr19   | 7506639   | 7507039  | Promoter (<=1kb)  | 19      | 7506795   | 7508447  | 0             | ENSG00000198723 | TEX45        |
| NR4A3_R848 | chr19   | 7640163   | 7640563  | Promoter (<=1kb)  | 19      | 7640741   | 7641913  | -178          | ENSG00000076944 | STXBP2       |
| NR4A3_R848 | chr19   | 7842376   | 7842776  | Promoter (3-4kb)  | 19      | 7846543   | 7863702  | -3767         | ENSG00000142459 | EV15L        |
| NR4A3_R848 | chr19   | 8118055   | 8118455  | Promoter (6-7kb)  | 19      | 8110888   | 8111806  | -6249         | ENSG00000142449 | FBN3         |
| NR4A3_R848 | chr19   | 8304241   | 8304641  | Promoter (3-4kb)  | 19      | 8302317   | 8308271  | 3630          | ENSG00000167775 | CD320        |
| NR4A3_R848 | chr19   | 8330152   | 8330552  | Promoter (3-4kb)  | 19      | 8332745   | 8334430  | 3878          | ENSG00000186994 | KANK3        |
| NR4A3_R848 | chr19   | 8349727   | 8350127  | Promoter (6-7kb)  | 19      | 833217    | 8343262  | -6465         | ENSG00000186994 | KANK3        |
| NR4A3_R848 | chr19   | 8543711   | 8544111  | Promoter (1-2kb)  | 19      | 8544068   | 8545718  | 1607          | ENSG00000142347 | MYO1F        |
| NR4A3_R848 | chr19   | 8867127   | 8867527  | Promoter (<=1kb)  | 19      | 8863316   | 8867014  | -113          | ENSG00000181143 | MUC16        |
| NR4A3_R848 | chr19   | 9604255   | 9604655  | Promoter (9-10kb) | 19      | 9611029   | 9614280  | 9625          | ENSG00000171469 | ZNF561       |
| NR4A3_R848 | chr19   | 9785776   | 9786176  | Promoter (<=1kb)  | 19      | 9758547   | 9785996  | 0             | ENSG00000196605 | ZNF846       |
| NR4A3_R848 | chr19   | 10006999  | 10007399 | Promoter (3-4kb)  | 19      | 9959561   | 10010504 | 3105          | ENSG00000080573 | COL5A3       |
| NR4A3_R848 | chr19   | 11503944  | 11504344 | Promoter (<=1kb)  | 19      | 11496036  | 11505184 | 840           | ENSG00000161914 | ZNF653       |
| NR4A3_R848 | chr19   | 12903433  | 12903833 | Promoter (2-3kb)  | 19      | 12899082  | 12900484 | -2949         | ENSG00000161860 | SYCE2        |
| NR4A3_R848 | chr19   | 12989395  | 12989814 | Promoter (5-6kb)  | 19      | 12995608  | 13096201 | -5794         | ENSG0000008441  | NFIX         |
| NR4A3_R848 | chr19   | 12991322  | 12991722 | Promoter (3-4kb)  | 19      | 12995608  | 13096201 | -3886         | ENSG0000008441  | NFIX         |
| NR4A3_R848 | chr19   | 13633635  | 13634035 | Promoter (<=1kb)  | 19      | 13371761  | 13633025 | -610          | ENSG00000141837 | CACNA1A      |
| NR4A3_R848 | chr19   | 14564407  | 14564807 | Promoter (<=1kb)  | 19      | 14564694  | 14565925 | 0             | ENSG00000099797 | TECR         |
| NR4A3_R848 | chr19   | 15243269  | 15243669 | Promoter (9-10kb) | 19      | 15226925  | 15233435 | -9834         | ENSG00000105131 | EPHX3        |
| NR4A3_R848 | chr19   | 16069490  | 16069890 | Promoter (1-2kb)  | 19      | 16067733  | 16102875 | 1757          | ENSG00000167460 | TPM4         |
| NR4A3_R848 | chr19   | 16874871  | 16875271 | Promoter (<=1kb)  | 19      | 16875931  | 16878706 | -660          | ENSG00000127511 | SIN3B        |
| NR4A3_R848 | chr19   | 17218542  | 17218942 | Promoter (2-3kb)  | 19      | 17215829  | 17217670 | 2713          | ENSG00000053501 | USE1         |
| NR4A3_R848 | chr19   | 17331742  | 17332142 | Promoter (2-3kb)  | 19      | 17333288  | 17334729 | 2587          | ENSG00000074855 | ANO8         |
| NR4A3_R848 | chr19   | 17630856  | 17631256 | Promoter (2-3kb)  | 19      | 17626288  | 17628337 | -2519         | ENSG00000130477 | UNC13A       |
| NR4A3_R848 | chr19   | 17633428  | 17633828 | Promoter (5-6kb)  | 19      | 17626288  | 17628337 | -5091         | ENSG00000130477 | UNC13A       |
| NR4A3_R848 | chr19   | 18441938  | 18442494 | Promoter (2-3kb)  | 19      | 18444516  | 18445399 | 2905          | ENSG00000105656 | ELL          |
| NR4A3_R848 | chr19   | 18799451  | 18799851 | Promoter (8-9kb)  | 19      | 18782774  | 18791305 | -8146         | ENSG00000105664 | COMP         |
| NR4A3_R848 | chr19   | 19239310  | 19239710 | Promoter (<=1kb)  | 19      | 19238392  | 19249019 | 918           | ENSG00000130287 | NCAN         |
| NR4A3_R848 | chr19   | 19300304  | 19300704 | Promoter (1-2kb)  | 19      | 19276513  | 19302455 | 1751          | ENSG00000105705 | SUGP1        |
| NR4A3_R848 | chr19   | 19534146  | 19534546 | Promoter (3-4kb)  | 19      | 19538248  | 19546659 | -3702         | ENSG00000160161 | CILP2        |
| NR4A3_R848 | chr19   | 22416129  | 22416529 | Promoter (5-6kb)  | 19      | 22391019  | 22422346 | 5817          | ENSG00000197360 | ZNF98        |
| NR4A3_R848 | chr19   | 32998754  | 32999154 | Promoter (2-3kb)  | 19      | 32994022  | 32996461 | -2293         | ENSG00000131941 | RHPN2        |
| NR4A3_R848 | chr19   | 33506082  | 33506482 | Promoter (4-5kb)  | 19      | 33462951  | 33511138 | 4656          | ENSG00000124299 | PEPD         |
| NR4A3_R848 | chr19   | 35105301  | 35105701 | Promoter (<=1kb)  | 19      | 35042902  | 35106275 | 574           | ENSG00000227392 | HPN-AS1      |
| NR4A3_R848 | chr19   | 35734648  | 35735048 | Promoter (<=1kb)  | 19      | 35735220  | 35738878 | -172          | ENSG00000272333 | KMT2B        |
| NR4A3_R848 | chr19   | 35886404  | 35886804 | Promoter (7-8kb)  | 19      | 35879227  | 35879791 | 7177          | ENSG00000105290 | APLP1        |
| NR4A3_R848 | chr19   | 36024597  | 36024997 | Promoter (1-2kb)  | 19      | 36024344  | 36026225 | 1228          | ENSG00000105270 | CLIP3        |
| NR4A3_R848 | chr19   | 36120750  | 36121150 | Promoter (<=1kb)  | 19      | 36120482  | 36125733 | 268           | ENSG00000105254 | TBCB         |
| NR4A3_R848 | chr19   | 36135735  | 36136135 | Promoter (3-4kb)  | 19      | 36139953  | 36149912 | -3818         | ENSG00000126247 | CAPNS1       |
| NR4A3_R848 | chr19   | 36212851  | 36213251 | Promoter (<=1kb)  | 19      | 36194296  | 36213392 | 141           | ENSG00000196357 | ZNF565       |
| NR4A3_R848 | chr19   | 37303475  | 37303929 | Promoter (<=1kb)  | 19      | 37235507  | 37304340 | 411           | NA              | LOC284412    |
| NR4A3_R848 | chr19   | 38196107  | 38196507 | Promoter (7-8kb)  | 19      | 38203692  | 38206390 | -7185         | ENSG00000105738 | SIPA1L3      |
| NR4A3_R848 | chr19   | 41089596  | 41089996 | Promoter (1-2kb)  | 19      | 41088451  | 41096195 | 1145          | ENSG00000197838 | CYP2A13      |
| NR4A3_R848 | chr19   | 41845185  | 41845585 | Promoter (<=1kb)  | 19      | 41845325  | 41848832 | 0             | ENSG00000142025 | DMRTC2       |
| NR4A3_R848 | chr19   | 41918433  | 41918833 | Promoter (4-5kb)  | 19      | 41923094  | 41930127 | -4261         | ENSG00000076928 | LOC100505585 |
| NR4A3_R848 | chr19   | 44410640  | 44411040 | Promoter (9-10kb) | 19      | 44329695  | 44401608 | -9032         | ENSG00000062370 | ZNF112       |
| NR4A3_R848 | chr19   | 45265454  | 45265854 | Promoter (<=1kb)  | 19      | 45264687  | 45288552 | 767           | ENSG0000007047  | MARK4        |
| NR4A3_R848 | chr19   | 45894010  | 45894410 | Promoter (7-8kb)  | 19      | 45883608  | 45886141 | -7869         | ENSG00000170604 | IRF2BP1      |
| NR4A3_R848 | chr19   | 45912679  | 45913079 | Promoter (1-2kb)  | 19      | 45913214  | 45914778 | 1699          | ENSG00000188425 | NANOS2       |
| NR4A3_R848 | chr19   | 47115786  | 47116186 | Promoter (2-3kb)  | 19      | 47064187  | 47113776 | -2010         | ENSG00000130749 | ZC3H4        |
| NR4A3_R848 | chr19   | 48023396  | 48023796 | Promoter (3-4kb)  | 19      | 48019805  | 48025148 | 3591          | ENSG00000169393 | ELSPBP1      |
| NR4A3_R848 | chr19   | 48067791  | 48068191 | Promoter (<=1kb)  | 19      | 48054890  | 48067931 | 0             | ENSG00000105499 | PLA2G4C      |
| NR4A3_R848 | chr19   | 48342109  | 48342514 | Promoter (<=1kb)  | 19      | 48333276  | 48342991 | 477           | ENSG00000161558 | TMEM143      |
| NR4A3_R848 | chr19   | 48649713  | 48650113 | Promoter (3-4kb)  | 19      | 48637946  | 48646187 | -3526         | ENSG00000063180 | CA11         |
| NR4A3_R848 | chr19   | 48821918  | 48822318 | Promoter (6-7kb)  | 19      | 48813018  | 48815072 | -6846         | ENSG00000087076 | HSD17B14     |
| NR4A3_R848 | chr19   | 48903544  | 48903944 | Promoter (2-3kb)  | 19      | 48900798  | 48919259 | 2746          | ENSG00000104805 | NUCB1        |
| NR4A3_R848 | chr19   | 49068571  | 49068971 | Promoter (3-4kb)  | 19      | 49055793  | 49065076 | -3495         | ENSG00000225950 | NTF4         |
| NR4A3_R848 | chr19   | 49129531  | 49129931 | Promoter (<=1kb)  | 19      | 49128580  | 49130599 | 951           | ENSG00000177380 | PPFIA3       |
| NR4A3_R848 | chr19   | 49140635  | 49141035 | Promoter (1-2kb)  | 19      | 49142984  | 49151026 | -1949         | ENSG00000177380 | PPFIA3       |
| NR4A3_R848 | chr19   | 49166286  | 49166686 | Promoter (<=1kb)  | 19      | 49167644  | 49168337 | -958          | ENSG00000130529 | TRPM4        |
| NR4A3_R848 | chr19   | 49181834  | 49182234 | Promoter (<=1kb)  | 19      | 49182526  | 49211836 | -292          | ENSG00000130529 | TRPM4        |
| NR4A3_R848 | chr19   | 49360980  | 49361380 | Promoter (<=1kb)  | 19      | 49340595  | 49361495 | 115           | ENSG00000074219 | TEAD2        |
| NR4A3_R848 | chr19   | 50169205  | 50169744 | Promoter (6-7kb)  | 19      | 50152548  | 50163195 | -6010         | ENSG00000161652 | IZUMO2       |
| NR4A3_R848 | chr19   | 50399887  | 50400287 | Promoter (2-3kb)  | 19      | 50403212  | 50414889 | -2925         | ENSG00000062822 | POLD1        |
| NR4A3_R848 | chr19   | 50498662  | 50499062 | Promoter (8-9kb)  | 19      | 50506446  | 50508029 | 8967          | ENSG00000161677 | JOSD2        |
| NR4A3_R848 | chr19   | 50566791  | 50567191 | Promoter (<=1kb)  | 19      | 50516892  | 50568045 | 854           | ENSG00000131409 | LRRC4B       |
| NR4A3_R848 | chr19   | 50568797  | 50569197 | Promoter (<=1kb)  | 19      | 50516892  | 50568435 | -362          | ENSG00000131409 | LRRC4B       |
| NR4A3_R848 | chr19   | 50626073  | 50626473 | Promoter (<=1kb)  | 19      | 50622420  | 50626134 | 0             | ENSG00000213023 | SYT3         |
| NR4A3_R848 | chr19   | 50644478  | 50644878 | Promoter (4-5kb)  | 19      | 50649445  | 50659306 | -4567         | ENSG00000235034 | C19orf81     |
| NR4A3_R848 | chr19   | 50981015  | 50981748 | Promoter (2-3kb)  | 19      | 50976488  | 50983815 | 2067          | ENSG00000169035 | KLK7         |
| NR4A3_R848 | chr19   | 51083100  | 51083500 | Promoter (<=1kb)  | 19      | 51077969  | 51082886 | -214          | ENSG00000129437 | KLK14        |
| NR4A3_R848 | chr19   | 51319787  | 51320187 | Promoter (7-8kb)  | 19      | 51311848  | 51330354 |               |                 |              |



| Condition  | peakChr | peakStart | peakEnd  | annotation        | geneChr | geneStart | geneEnd  | distanceToTSS | geneID          | geneSymbol   |
|------------|---------|-----------|----------|-------------------|---------|-----------|----------|---------------|-----------------|--------------|
| NR4A3_R848 | chr20   | 25220163  | 25220563 | Promoter (1-2kb)  | 20      | 25221792  | 25226729 | -1229         | ENSG00000197586 | ENTPD6       |
| NR4A3_R848 | chr20   | 26074020  | 26074420 | Promoter (1-2kb)  | 20      | 26072673  | 26082955 | 1347          | ENSG00000125804 | FAM182A      |
| NR4A3_R848 | chr20   | 30412897  | 30413297 | Promoter (9-10kb) | 20      | 30403123  | 30403384 | -9513         | NA              | MLLT10P1     |
| NR4A3_R848 | chr20   | 33308710  | 33309110 | Promoter (9-10kb) | 20      | 33298713  | 33307966 | 9997          | ENSG00000125999 | BPIFB1       |
| NR4A3_R848 | chr20   | 35505462  | 35505862 | Promoter (2-3kb)  | 20      | 35502906  | 35511640 | 2556          | ENSG00000126001 | CEP250       |
| NR4A3_R848 | chr20   | 35665901  | 35666301 | Promoter (<=1kb)  | 20      | 35626252  | 35664956 | -945          | ENSG00000214078 | CPNE1        |
| NR4A3_R848 | chr20   | 35960611  | 35961011 | Promoter (5-6kb)  | 20      | 35953617  | 35955359 | -5252         | ENSG00000171222 | SCAND1       |
| NR4A3_R848 | chr20   | 36314784  | 36315351 | Promoter (8-9kb)  | 20      | 36306381  | 36528633 | 8403          | ENSG00000080845 | DLGAP4       |
| NR4A3_R848 | chr20   | 36725672  | 36726072 | Promoter (3-4kb)  | 20      | 36652375  | 36721787 | -3885         | ENSG00000101079 | NDRG3        |
| NR4A3_R848 | chr20   | 38313812  | 38314457 | Promoter (3-4kb)  | 20      | 38317649  | 38337325 | -3192         | ENSG00000101425 | BPI          |
| NR4A3_R848 | chr20   | 38590339  | 38590739 | Promoter (9-10kb) | 20      | 38581195  | 38588463 | 9144          | ENSG00000182035 | ADIG         |
| NR4A3_R848 | chr20   | 44404825  | 44405225 | Promoter (2-3kb)  | 20      | 44408120  | 44408203 | -2895         | ENSG00000266151 | MIR3646      |
| NR4A3_R848 | chr20   | 57997839  | 57998239 | Promoter (5-6kb)  | 20      | 58003904  | 58004648 | -5665         | ENSG00000275852 | LINC01742    |
| NR4A3_R848 | chr20   | 58695045  | 58695445 | Promoter (<=1kb)  | 20      | 58694421  | 58713580 | 624           | ENSG00000254995 | STX16-NPEPL1 |
| NR4A3_R848 | chr20   | 58830333  | 58830733 | Promoter (8-9kb)  | 20      | 58839718  | 58911192 | -8985         | ENSG00000087460 | GNAS         |
| NR4A3_R848 | chr20   | 59604585  | 59604985 | Promoter (<=1kb)  | 20      | 59604540  | 59847711 | 45            | ENSG00000087495 | PHACTR3      |
| NR4A3_R848 | chr20   | 59686591  | 59687060 | Promoter (9-10kb) | 20      | 59676661  | 59847711 | 9930          | ENSG00000087495 | PHACTR3      |
| NR4A3_R848 | chr20   | 60314556  | 60314956 | Promoter (6-7kb)  | 20      | 60308474  | 60308567 | 6082          | ENSG00000207802 | MIR646       |
| NR4A3_R848 | chr20   | 62014619  | 62015019 | Promoter (1-2kb)  | 20      | 62010067  | 62012883 | -1736         | ENSG00000130699 | TAF4         |
| NR4A3_R848 | chr20   | 62397964  | 62398364 | Promoter (1-2kb)  | 20      | 62391014  | 62396331 | -1633         | ENSG00000149679 | CABLES2      |
| NR4A3_R848 | chr20   | 62421381  | 62421781 | Promoter (5-6kb)  | 20      | 62410237  | 62427539 | 5758          | ENSG00000130701 | RBBP8NL      |
| NR4A3_R848 | chr20   | 62755251  | 62755651 | Promoter (<=1kb)  | 20      | 62756631  | 62762771 | -980          | ENSG00000101188 | NTSR1        |
| NR4A3_R848 | chr20   | 63221419  | 63221819 | Promoter (5-6kb)  | 20      | 63196367  | 63216139 | -5280         | ENSG00000149658 | YTHDF1       |
| NR4A3_R848 | chr20   | 63256898  | 63257298 | Promoter (2-3kb)  | 20      | 63240784  | 63254463 | -2435         | ENSG00000101198 | NKAIN4       |
| NR4A3_R848 | chr20   | 63808733  | 63809133 | Promoter (<=1kb)  | 20      | 63808076  | 63816521 | 657           | NA              | ZBTB46-AS1   |
| NR4A3_R848 | chr21   | 8219771   | 8220183  | Promoter (7-8kb)  | 21      | 8212572   | 8212724  | 7199          | ENSG00000276700 | RNA5-8SN4    |
| NR4A3_R848 | chr21   | 13986632  | 13987032 | Promoter (6-7kb)  | 21      | 13943769  | 13980437 | -6195         | ENSG00000215559 | ANKRD20A11P  |
| NR4A3_R848 | chr21   | 13987239  | 13987639 | Promoter (6-7kb)  | 21      | 13943769  | 13980437 | -6802         | ENSG00000215559 | ANKRD20A11P  |
| NR4A3_R848 | chr21   | 32586120  | 32586520 | Promoter (<=1kb)  | 21      | 32576659  | 32585533 | -587          | ENSG00000242220 | TCP10L       |
| NR4A3_R848 | chr21   | 32586775  | 32587175 | Promoter (<=1kb)  | 21      | 32576848  | 32587373 | 198           | ENSG00000242220 | TCP10L       |
| NR4A3_R848 | chr21   | 35992908  | 35993308 | Promoter (8-9kb)  | 21      | 35954660  | 35984749 | -8159         | NA              | LOC101928269 |
| NR4A3_R848 | chr21   | 36539181  | 36539581 | Promoter (3-4kb)  | 21      | 36460621  | 36542600 | 3019          | ENSG00000159261 | CLDN14       |
| NR4A3_R848 | chr21   | 42027469  | 42027869 | Promoter (5-6kb)  | 21      | 42022267  | 42024924 | 5202          | ENSG00000237232 | ZNF295-AS1   |
| NR4A3_R848 | chr21   | 42292573  | 42293199 | Promoter (6-7kb)  | 21      | 42285934  | 42295352 | 6639          | ENSG00000160179 | ABCG1        |
| NR4A3_R848 | chr21   | 42615283  | 42615695 | Promoter (<=1kb)  | 21      | 42599280  | 42615058 | -225          | ENSG00000225431 | LINC01671    |
| NR4A3_R848 | chr21   | 42662626  | 42663320 | Promoter (8-9kb)  | 21      | 42653813  | 42775509 | 8813          | ENSG00000160191 | PDE9A        |
| NR4A3_R848 | chr21   | 42691444  | 42691844 | Promoter (5-6kb)  | 21      | 42686197  | 42762139 | 5247          | ENSG00000160191 | PDE9A        |
| NR4A3_R848 | chr21   | 43337010  | 43337599 | Promoter (4-5kb)  | 21      | 43322417  | 43332039 | -4971         | NA              | LINC00322    |
| NR4A3_R848 | chr21   | 43917903  | 43918303 | Promoter (1-2kb)  | 21      | 43916272  | 43969153 | 1631          | ENSG00000160216 | AGPAT3       |
| NR4A3_R848 | chr21   | 43958652  | 43959052 | Promoter (<=1kb)  | 21      | 43959783  | 43982724 | -731          | ENSG00000160216 | AGPAT3       |
| NR4A3_R848 | chr21   | 44419472  | 44419969 | Promoter (2-3kb)  | 21      | 44414595  | 44416740 | -2732         | NA              | TRPM2-AS     |
| NR4A3_R848 | chr21   | 44551187  | 44551587 | Promoter (<=1kb)  | 21      | 44550357  | 44551505 | 0             | ENSG00000205445 | KRTAP10-2    |
| NR4A3_R848 | chr21   | 44816808  | 44817208 | Promoter (<=1kb)  | 21      | 44808271  | 44817968 | 760           | ENSG00000184900 | SUMO3        |
| NR4A3_R848 | chr21   | 44884375  | 44884775 | Promoter (4-5kb)  | 21      | 44886333  | 44889131 | 4356          | ENSG00000160255 | ITGB2        |
| NR4A3_R848 | chr21   | 45483839  | 45484312 | Promoter (5-6kb)  | 21      | 45478266  | 45478326 | 5573          | ENSG00000275167 | MIR6815      |
| NR4A3_R848 | chr21   | 45506821  | 45507221 | Promoter (<=1kb)  | 21      | 45506019  | 45512567 | 802           | ENSG00000182871 | COL18A1      |
| NR4A3_R848 | chr21   | 45569955  | 45570355 | Promoter (6-7kb)  | 21      | 45514715  | 45563115 | -6840         | ENSG00000173638 | SLC19A1      |
| NR4A3_R848 | chr21   | 45636126  | 45636526 | Promoter (7-8kb)  | 21      | 45643694  | 45788739 | -7168         | ENSG00000183570 | PCBP3        |
| NR4A3_R848 | chr21   | 45984542  | 45984942 | Promoter (2-3kb)  | 21      | 45987109  | 45987633 | -2167         | ENSG00000142156 | COL6A1       |
| NR4A3_R848 | chr21   | 46090830  | 46091327 | Promoter (6-7kb)  | 21      | 46098097  | 46132849 | -6770         | ENSG00000142173 | COL6A2       |
| NR4A3_R848 | chr22   | 18961585  | 18961985 | Promoter (8-9kb)  | 22      | 18970514  | 18994628 | -8529         | ENSG00000273032 | DGCR5        |
| NR4A3_R848 | chr22   | 19166151  | 19166551 | Promoter (4-5kb)  | 22      | 19171395  | 19172839 | -4844         | NA              | LINC01311    |
| NR4A3_R848 | chr22   | 19430152  | 19430552 | Promoter (<=1kb)  | 22      | 19398061  | 19430263 | 0             | ENSG00000100084 | HIRA         |
| NR4A3_R848 | chr22   | 19906600  | 19907000 | Promoter (8-9kb)  | 22      | 19875522  | 19898041 | -8559         | ENSG00000184470 | TXNRD2       |
| NR4A3_R848 | chr22   | 19994634  | 19995034 | Promoter (3-4kb)  | 22      | 19971228  | 19990794 | -3840         | ENSG00000099889 | ARVCF        |
| NR4A3_R848 | chr22   | 20251844  | 20252287 | Promoter (2-3kb)  | 22      | 20249134  | 20249211 | -2633         | ENSG00000221039 | MIR1286      |
| NR4A3_R848 | chr22   | 23130320  | 23130720 | Promoter (3-4kb)  | 22      | 23124227  | 23134074 | 3354          | ENSG00000100218 | RSPH14       |
| NR4A3_R848 | chr22   | 23286976  | 23287376 | Promoter (2-3kb)  | 22      | 23289615  | 23310433 | -2239         | ENSG00000186716 | BCR          |
| NR4A3_R848 | chr22   | 23535351  | 23535751 | Promoter (1-2kb)  | 22      | 23536881  | 23539480 | -1130         | NA              | PCAT14       |
| NR4A3_R848 | chr22   | 23646423  | 23646823 | Promoter (5-6kb)  | 22      | 23638492  | 23640762 | -5661         | ENSG00000228315 | GUSBP11      |
| NR4A3_R848 | chr22   | 23657661  | 23658061 | Promoter (4-5kb)  | 22      | 23638487  | 23652886 | -4775         | ENSG00000228315 | GUSBP11      |
| NR4A3_R848 | chr22   | 24633685  | 24634085 | Promoter (<=1kb)  | 22      | 24632954  | 24650012 | 731           | NA              | BCRP3        |
| NR4A3_R848 | chr22   | 27298916  | 27299316 | Promoter (8-9kb)  | 22      | 27307802  | 27317456 | -8486         | ENSG00000226741 | LINC02554    |
| NR4A3_R848 | chr22   | 29220729  | 29221129 | Promoter (5-6kb)  | 22      | 29215577  | 29233667 | 5152          | ENSG00000186998 | EMID1        |
| NR4A3_R848 | chr22   | 35533730  | 35534130 | Promoter (6-7kb)  | 22      | 35540831  | 35553999 | -6701         | ENSG00000100302 | RASD2        |
| NR4A3_R848 | chr22   | 35543717  | 35544117 | Promoter (2-3kb)  | 22      | 35540831  | 35553999 | 2886          | ENSG00000100302 | RASD2        |
| NR4A3_R848 | chr22   | 37511007  | 37511407 | Promoter (<=1kb)  | 22      | 37507882  | 37510565 | -442          | ENSG00000100065 | CARD10       |
| NR4A3_R848 | chr22   | 38761650  | 38762050 | Promoter (5-6kb)  | 22      | 38745687  | 38756000 | -5650         | ENSG00000100242 | SUN2         |
| NR4A3_R848 | chr22   | 39372015  | 39372415 | Promoter (7-8kb)  | 22      | 39364170  | 39378381 | 7845          | ENSG00000100321 | SYNGR1       |
| NR4A3_R848 | chr22   | 39565859  | 39566284 | Promoter (4-5kb)  | 22      | 39570753  | 39684528 | -4469         | ENSG00000100346 | CACNA1I      |
| NR4A3_R848 | chr22   | 40007323  | 40007723 | Promoter (1-2kb)  | 22      | 40009688  | 40030031 | -1965         | ENSG00000133477 | FAM83F       |
| NR4A3_R848 | chr22   | 42521637  | 42522037 | Promoter (1-2kb)  | 22      | 42515201  | 42519796 | -1841         | ENSG00000189306 | RRP7A        |
| NR4A3_R848 | chr22   | 43205692  | 43206092 | Promoter (6-7kb)  | 22      | 43212674  | 43213661 | -6582         | ENSG00000236272 | SCUBE1-AS2   |
| NR4A3_R848 | chr22   | 43508276  | 43508676 | Promoter (7-8kb)  | 22      | 43516107  | 43537117 | -7431         | NA              | EFCAB6-AS1   |
| NR4A3_R848 | chr22   | 43509200  | 43509600 | Promoter (6-7kb)  | 22      | 43516107  | 43537117 | -6507         | NA              | EFCAB6-AS1   |
| NR4A3_R848 | chr22   | 43562660  | 43563060 | Promoter (7-8kb)  | 22      | 43528744  | 43570143 | 7083          | ENSG00000186976 | EFCAB6       |
| NR4A3_R848 | chr22   | 44322778  | 44323178 | Promoter (9-10kb) | 22      | 44243665  | 44312951 | -9827         | ENSG00000138944 | SHISAL1      |
| NR4A3_R848 | chr22   | 44617527  | 44617927 | Promoter (7-8kb)  | 22      | 44606939  | 44625419 | 7492          | NA              | LINC00229    |
| NR4A3_R848 | chr22   | 44617957  | 44618357 | Promoter (7-8kb)  | 22      | 44606939  | 44625419 | 7062          | NA              | LINC00229    |
| NR4A3_R848 | chr22   | 44708720  | 44709120 | Promoter (6-7kb)  | 22      | 44702520  | 44737215 | 6200          | ENSG00000186654 | PRR5         |
| NR4A3_R848 | chr22   | 46659114  | 46659514 | Promoter (3-4kb)  | 22      | 46663107  | 46671167 | -3593         | ENSG00000075240 | GRAMD4       |
| NR4A3_R848 | chr22   | 46673190  | 46673590 | Promoter (1-2kb)  | 22      | 46674608  | 46679683 | -1018         | ENSG00000075240 | GRAMD4       |
| NR4A3_R848 | chr22   | 47628557  | 47628957 | Promoter (<=1kb)  | 22      | 47625230  | 47629902 | 945           | ENSG00000205634 | LINC00898    |
| NR4A3_R848 | chr22   | 48541907  | 48542307 | Promoter (5-6kb)  | 22      | 48538902  | 48547342 | 5035          | ENSG00000281732 | LOC284933    |
| NR4A3_R848 | chr22   | 48542511  | 48542911 | Promoter (4-5kb)  | 22      | 48538902  | 48547342 | 4431          | ENSG00000281732 | LOC284933    |
| NR4A3_R848 | chr22   | 48858825  | 48859225 | Promoter (7-8kb)  | 22      | 48866770  | 48898386 | -7545         | ENSG00000205632 | LINC01310    |
| NR4A3_R848 | chr22   | 50233989  | 50234389 | Promoter (5-6kb)  | 22      | 50226735  | 50240360 | 5971          | ENSG00000128159 | TUBGCP6      |
| NR4A3_R848 | chr22   | 50339686  | 50340086 | Promoter (3-4kb)  | 22      | 50343304  | 50445090 | -3218         | ENSG00000100239 | PPP6R2       |
