# Supplementary material for: Nuclear Receptor Subfamily 4A Signaling as a Key Disease Pathway of CD1c+ Dendritic Cell Dysregulation in Systemic Sclerosis
Source: PubMed Central journal article supplement — Arthritis Rheumatol. 2022 Dec 8;75(2):279–92. doi: 10.1002/art.42319 (PMC10108054; doi:10.1002/art.42319), 2022-12-08
Supplement: ART-75-279-s009.pdf [file ART-75-279-s009.pdf]

| subset     | ID         | Description                                                        | GeneRatio | BgRatio   | pvalue   | p.adjust | geneID                                                                                                                                                                                                                                                                                                                                                                                                                                                                   |
|------------|------------|--------------------------------------------------------------------|-----------|-----------|----------|----------|--------------------------------------------------------------------------------------------------------------------------------------------------------------------------------------------------------------------------------------------------------------------------------------------------------------------------------------------------------------------------------------------------------------------------------------------------------------------------|
| Up dcSsc   | GO:0006958 | complement activation, classical pathway                           | 34/1134   | 137/18670 | 1.06E-12 | 5.13E-09 | IGHV3-21/IGHV4-59/IGLC3/IGLV2-23/IGHA1/IGHV4-34/IGKV1-16/IGLV2-14/IGLV1-47/IGHG3/IGKV3-15/IGHV3-48/IGLV1-44/IGLV3-1/IGHV2-26/IGLC2/IGKC/IGKV1-17/CR2/IGLL5/IGHM/IGKV3D-20/IGHA2/IGLV1-40/C1S/IGKV4-1/IGHV1-69-2/IGHV3-11/IGHD/IGHG1/IGKV3-20/IGHV4-31/IGKV1-5/IGHV3-20                                                                                                                                                                                                   |
| Up dcSsc   | GO:0042113 | B cell activation                                                  | 54/1134   | 310/18670 | 1.90E-12 | 5.13E-09 | NBN/IGHV3-21/IGHV4-59/IGLC3/TP53/IGHA1/IGHV4-34/IGHG3/PRKDC/IGHV3-48/TNFRSF13C/DOCK11/IGHV2-26/IGLC2/ADAM17/IGKC/CR2/IGLL5/IGHM/MZB1/NCKAP1L/CD19/TXNA/TXNA2/CIRG1/IGHA2/TLR4/IKZF3/IRS2/ZFP36L2/SWAP70/BATF/MS4A1/HSPD1/FCRL1/PAWR/MIR17HG/BST2/JAK3/ATP11C/IGHV1-69-2/IGHV3-11/SKAP2/CD79B/TNFAIP3/IGHD/CD79A/IGHG1/IL7/PCID2/TNFRSF13B/FCRL3/IGHV4-31/BLNK/IGHV3-20                                                                                                   |
| Up dcSsc   | GO:0002455 | humoral immune response mediated by circulating immunoglobulin     | 35/1134   | 150/18670 | 3.41E-12 | 6.14E-09 | IGHV3-21/IGHV4-59/IGLC3/IGLV2-23/IGHA1/IGHV4-34/IGKV1-16/IGLV2-14/IGLV1-47/IGHG3/IGKV3-15/IGHV3-48/IGLV1-44/IGLV3-1/IGHV2-26/IGLC2/IGKC/IGKV1-17/CR2/IGLL5/IGHM/IGKV3D-20/IGHA2/IGLV1-40/C1S/IGKV4-1/IGHV1-69-2/IGHV3-11/IGHD/IGHG1/FCER2/IGKV3-20/IGHV4-31/IGKV1-5/IGHV3-20                                                                                                                                                                                             |
| Up dcSsc   | GO:0006909 | phagocytosis                                                       | 57/1134   | 369/18670 | 6.80E-11 | 6.46E-08 | IGHV3-21/IGHV4-59/DYSF/IGLC3/IGLV2-23/IGHA1/PRTN3/IGHV4-34/IGKV1-16/IGLV2-14/LYAR/PTEN/IGLV1-47/SYT11/IGHG3/IGKV3-15/STAP1/PTK2/IGHV3-48/IGLV1-44/IGLV3-1/UNC13D/IGHV2-26/IGLC2/RAB27A/SPG11/IGKC/IGKV1-17/CORO1C/IGLL5/MYH9/IGHM/NCKAP1L/IGKV3D-20/CD93/IGHA2/IGLV1-40/TLR4/FCGR3A/ANXA3/IGKV4-1/ITGAV/WAS/IGHV1-69-2/IGHV3-11/RAB14/TLR2/IGHD/IGHG1/FPR2/IGKV3-20/IGHV4-31/IGKV1-5/IGHV3-20/TXNDC5/CALR/NCF2                                                           |
| Up dcSsc   | GO:0043312 | neutrophil degranulation                                           | 68/1134   | 485/18670 | 8.38E-11 | 6.46E-08 | IDH1/APAF1/COPB1/PRTN3/CAND1/PYGB/BPI/CLEC12A/PSMC2/METTL7A/PSEN1/RAB44/MMP8/ADAM10/IQGAP2/UNC13D/RAB27A/RNASE2/PSMA2/CAPN1/IGLB1/LTF/DNAJC13/PSMD1/S100A8/ENPP4/MCEMP1/SIGLEC9/HPSE/NCKAP1L/LRG1/RAB10/DYNLT1/RETN/CD93/MAPK14/TCIRG1/CD53/ANXA3/CRISPLD2/ITGAV/BST2/XRCC5/IQGAP1/GNS/PLGYP1/SERPINB10/DYNC1H1/PSMD11/S100A9/DSP/RAB14/CXCR2/SLC15A4/TLR2/CTSD/FPR2/CEACAM1/CCT2/SLPI/ARSB/RAB6A/CD63/DIAPH1/CRISP3/TXNDC5/HP/SLCO4C1                                   |
| Up dcSsc   | GO:0002283 | neutrophil activation involved in immune response                  | 68/1134   | 488/18670 | 1.10E-10 | 6.55E-08 | IDH1/APAF1/COPB1/PRTN3/CAND1/PYGB/BPI/CLEC12A/PSMC2/METTL7A/PSEN1/RAB44/MMP8/ADAM10/IQGAP2/UNC13D/RAB27A/RNASE2/PSMA2/CAPN1/IGLB1/LTF/DNAJC13/PSMD1/S100A8/ENPP4/MCEMP1/SIGLEC9/HPSE/NCKAP1L/LRG1/RAB10/DYNLT1/RETN/CD93/MAPK14/TCIRG1/CD53/ANXA3/CRISPLD2/ITGAV/BST2/XRCC5/IQGAP1/GNS/PLGYP1/SERPINB10/DYNC1H1/PSMD11/S100A9/DSP/RAB14/CXCR2/SLC15A4/TLR2/CTSD/FPR2/CEACAM1/CCT2/SLPI/ARSB/RAB6A/CD63/DIAPH1/CRISP3/TXNDC5/HP/SLCO4C1                                   |
| Up dcSsc   | GO:0002446 | neutrophil mediated immunity                                       | 69/1134   | 499/18670 | 1.13E-10 | 6.55E-08 | IDH1/APAF1/COPB1/PRTN3/CAND1/PYGB/BPI/CLEC12A/PSMC2/METTL7A/PSEN1/RAB44/MMP8/ADAM10/IQGAP2/UNC13D/RAB27A/ADAM17/RNASE2/PSMA2/CAPN1/IGLB1/LTF/DNAJC13/PSMD1/S100A8/ENPP4/MCEMP1/SIGLEC9/HPSE/NCKAP1L/LRG1/RAB10/DYNLT1/RETN/CD93/MAPK14/TCIRG1/CD53/ANXA3/CRISPLD2/ITGAV/BST2/XRCC5/IQGAP1/GNS/PLGYP1/SERPINB10/DYNC1H1/PSMD11/S100A9/DSP/RAB14/CXCR2/SLC15A4/TLR2/CTSD/FPR2/CEACAM1/CCT2/SLPI/ARSB/RAB6A/CD63/DIAPH1/CRISP3/TXNDC5/HP/SLCO4C1                            |
| Up dcSsc   | GO:0002429 | immune response-activating cell surface receptor signaling pathway | 66/1134   | 473/18670 | 1.97E-10 | 9.65E-08 | IGHV3-21/IGHV4-59/IGLC3/IGLV2-23/IGHA1/IGHV4-34/PRKACB/IGKV1-16/IGLV2-14/MAP3K7/IGLV1-47/IGHG3/IGKV3-15/PSMC2/PSEN1/STAP1/PTK2/IGHV3-48/IGLV1-44/IGLV3-1/MUC1/IGHV2-26/IGLC2/PSMA2/IGKC/IGKV1-17/CR2/LIME1/IGLL5/CMKLR1/IGHM/PSMD1/PAX5/NCKAP1L/GPR33/CD19/PRK2/IGKV3D-20/IGHA2/IGLV1-40/DUSP3/FCGR3A/UBE2N/MS4A1/IGKV4-1/PAWR/MUCA/WAS/CACNB3/IGHV1-69-2/IGHV3-11/PSMD11/CD79B/IGHD/CD79A/IGHG1/CLEC4E/FPR2/CEACAM1/IGKV3-20/FCRL3/IGHV4-31/IGKV1-5/IGHV3-20/BLK/CLEC6A |
| Up dcSsc   | GO:0042119 | neutrophil activation                                              | 68/1134   | 498/18670 | 2.69E-10 | 1.21E-07 | IDH1/APAF1/COPB1/PRTN3/CAND1/PYGB/BPI/CLEC12A/PSMC2/METTL7A/PSEN1/RAB44/MMP8/ADAM10/IQGAP2/UNC13D/RAB27A/RNASE2/PSMA2/CAPN1/IGLB1/LTF/DNAJC13/PSMD1/S100A8/ENPP4/MCEMP1/SIGLEC9/HPSE/NCKAP1L/LRG1/RAB10/DYNLT1/RETN/CD93/MAPK14/TCIRG1/CD53/ANXA3/CRISPLD2/ITGAV/BST2/XRCC5/IQGAP1/GNS/PLGYP1/SERPINB10/DYNC1H1/PSMD11/S100A9/DSP/RAB14/CXCR2/SLC15A4/TLR2/CTSD/FPR2/CEACAM1/CCT2/SLPI/ARSB/RAB6A/CD63/DIAPH1/CRISP3/TXNDC5/HP/SLCO4C1                                   |
| Up dcSsc   | GO:0048194 | Golgi vesicle budding                                              | 22/1134   | 80/18670  | 1.29E-09 | 4.63E-07 | USO1/NSF/SEC23IP/GOLPH3L/MIA3/PREB/CUL3/SEC22B/SEC24C/PEF1/F5/GBF1/LMAN1/SEC23B/RAB1A/ANKRD28/PRKCI/GOLPH3/SEC16A/SEC24A/SEC24D/MAPK15                                                                                                                                                                                                                                                                                                                                   |
| Up dcSsc   | GO:0050864 | regulation of B cell activation                                    | 35/1134   | 184/18670 | 1.37E-09 | 4.64E-07 | IGHV3-21/IGHV4-59/IGLC3/IGHA1/IGHV4-34/IGHG3/IGHV3-48/TNFRSF13C/IGHV2-26/IGLC2/IGKC/IGLL5/IGHM/MZB1/NCKAP1L/CD19/IGHA2/TLR4/IKZF3/IRS2/ZFP36L2/PAWR/MIR17HG/ATP11C/IGHV1-69-2/IGHV3-11/TNFAIP3/IGHD/IGHG1/IL7/PCID2/TNFRSF13B/FCRL3/IGHV4-31/IGHV3-20                                                                                                                                                                                                                    |
| Up dcSsc   | GO:0002449 | lymphocyte mediated immunity                                       | 52/1134   | 352/18670 | 2.34E-09 | 7.43E-07 | NBN/IGHV3-21/IGHV4-59/IGLC3/IGLV2-23/IGHA1/IGHV4-34/IGKV1-16/CLEC12B/IGLV2-14/MAP3K7/SCART1/IGLV1-47/IGHG3/IGKV3-15/IGHV3-48/IGLV1-44/IGLV3-1/UNC13D/IGHV2-26/IGLC2/RAB27A/IGKC/SLAMF6/IGKV1-17/CR2/FADD/IGLL5/IGHM/CD19/IGKV3D-20/TCIRG1/IGHA2/IGLV1-40/SWAP70/C1S/BATF/HSPD1/FBXO38/IGKV4-1/WAS/IGHV1-69-2/IGHV3-11/IGHD/IGHG1/FCER2/CEACAM1/IGKV3-20/IGHV4-31/KDELRL1/IGKV1-5/IGHV3-20                                                                                |
| Up dcSsc   | GO:0006900 | vesicle budding from membrane                                      | 24/1134   | 102/18670 | 7.09E-09 | 2.13E-06 | USO1/NSF/SEC23IP/GOLPH3L/MIA3/PREB/CUL3/SEC22B/SEC24C/PEF1/F5/GBF1/LMAN1/SEC23B/RAB1A/AP3D1/ANKRD28/PRKCI/ANXA2P2/GOLPH3/SEC16A/SEC24A/SEC24D/MAPK15                                                                                                                                                                                                                                                                                                                     |
| Up dcSsc   | GO:0016050 | vesicle organization                                               | 48/1134   | 325/18670 | 9.73E-09 | 2.75E-06 | USO1/NSF/SEC23IP/GOLPH3L/ANKFY1/DYSF/MIA3/EP15/VPS4B/PREB/ANXA8/CUL3/SEC22B/CHMP7/SEC24C/RAB27A/SPG11/CORO1C/SCARB2/AGFG1/DNAJC13/PEF1/VPS39/SORT1/C2CD5/AKTIP/F5/PI4K2B/GBF1/LMAN1/SEC23B/VPS41/RAB1A/AP3D1/TSG101/RAB14/ANKRD28/PRKCI/GRIKS/TAPBP/ANXA2P2/GOLPH3/SEC16A/HOOK3/SEC24A/SEC24D/MAPK15/CALR                                                                                                                                                                |
| Up dcSsc   | GO:0072376 | protein activation cascade                                         | 35/1134   | 198/18670 | 1.02E-08 | 2.75E-06 | IGHV3-21/IGHV4-59/IGLC3/IGLV2-23/IGHA1/IGHV4-34/IGKV1-16/IGLV2-14/IGLV1-47/IGHG3/IGKV3-15/IGHV3-48/IGLV1-44/IGLV3-1/IGHV2-26/IGLC2/IGKC/IGKV1-17/CR2/IGLL5/IGHM/CD19/IGKV3D-20/IGHA2/IGLV1-40/C1S/IGKV4-1/IGHV1-69-2/IGHV3-11/IGHD/IGHG1/IGKV3-20/IGHV4-31/IGKV1-5/IGHV3-20                                                                                                                                                                                              |
| Up dcSsc   | GO:0050900 | leukocyte migration                                                | 64/1134   | 499/18670 | 1.12E-08 | 2.88E-06 | IGHV4-59/DYSF/IGLC3/IGLV2-23/IGHA1/PRTN3/IGHV4-34/MIA3/IGKV1-16/SOS1/IGLV2-14/NLRP12/IGLV1-47/SLC16A8/IGKV3-15/ADAM10/STAP1/IGHV3-48/ECM1/IGLV1-44/IGLV3-1/IGLC2/ADAM17/ITGB7/IGKC/IGKV1-17/FADD/MYH9/TNFRSF11A/CMKLR1/IGHM/S100A8/NCKAP1L/IGKV3D-20/MAPK14/CCL17/IGHA2/IGLV1-40/GBF1/ITGA9/SWAP70/IGKV4-1/ITGAV/CH25H/IGHV3-11/S100A9/RAC2/CXCR2/CCL22/CXCR1/VPREB3/CCR1/FPR2/CEACAM1/IGKV3-20/CNR2/GOLPH3/THBS4/IGKV1-5/DBH/CCL24/CALR/IL6R/HOXA7                      |
| Up dcSsc   | GO:0030449 | regulation of complement activation                                | 25/1134   | 115/18670 | 1.93E-08 | 4.73E-06 | IGHV4-59/IGLC3/IGLV2-23/IGHV4-34/IGKV1-16/IGLV2-14/IGLV1-47/IGHG3/IGKV3-15/IGHV3-48/IGLV1-44/IGLV3-1/IGLC2/IGKC/IGKV1-17/CR2/CD19/IGKV3D-20/IGLV1-40/C1S/IGKV4-1/IGHV3-11/IGHG1/IGKV3-20/IGKV1-5                                                                                                                                                                                                                                                                         |
| Up dcSsc   | GO:2000257 | regulation of protein activation cascade                           | 25/1134   | 116/18670 | 2.32E-08 | 5.44E-06 | IGHV4-59/IGLC3/IGLV2-23/IGHV4-34/IGKV1-16/IGLV2-14/IGLV1-47/IGHG3/IGKV3-15/IGHV3-48/IGLV1-44/IGLV3-1/IGLC2/IGKC/IGKV1-17/CR2/CD19/IGKV3D-20/IGLV1-40/C1S/IGKV4-1/IGHV3-11/IGHG1/IGKV3-20/IGKV1-5                                                                                                                                                                                                                                                                         |
| Up dcSsc   | GO:0048193 | Golgi vesicle transport                                            | 50/1134   | 368/18670 | 7.50E-08 | 1.69E-05 | USO1/NSF/SEC23IP/GOLPH3L/ANKFY1/CAPZA1/NBAS/COPB2/COPB1/PGAP1/MIA3/PREPL/COPA/EP15/PREB/CUL3/SEC22B/SEC24C/OSBPL5/PEF1/RAB10/SORT1/ACS13/COPG1/KDELRL2/F5/GBF1/AMN/VPS54/LMAN1/KIF3C/PITPNB/TMED6/SEC23B/RAB1A/AP3D1/DYNC1H1/RAB14/ANKRD28/PRKCI/CP2/TAPBP/GOLPH3/SEC16A/RAB6A/KDELRL1/SEC24A/SEC24D/MAPK15/CAPZA2                                                                                                                                                       |
| Up dcSsc   | GO:0002920 | regulation of humoral immune response                              | 26/1134   | 134/18670 | 1.17E-07 | 2.34E-05 | IGHV4-59/IGLC3/IGLV2-23/IGHV4-34/IGKV1-16/IGLV2-14/IGLV1-47/IGHG3/IGKV3-15/IGHV3-48/IGLV1-44/IGLV3-1/IGLC2/IGKC/IGKV1-17/CR2/CD19/IGKV3D-20/IGLV1-40/C1S/IGKV4-1/IGHV3-11/IGHG1/FCER2/IGKV3-20/IGKV1-5                                                                                                                                                                                                                                                                   |
| Down dcSsc | GO:0006613 | cotranslational protein targeting to membrane                      | 68/859    | 109/18670 | 2.64E-63 | 1.26E-59 | RPL6/RPL37/RP58/RPL35A/RPL11/RPL4/RPL34/RPL30/RPL13A/RPL14/RPL13A/RPL19/RPL32/RPL26/RPS6/RPL27/RPL3/RPS29/UBA52/RPL7A/RPL31/RPL23/RPS3A/RPS27A/RPL10/RPL24/RPL22/RPS10/RPS17/RPL10A/RPS19/RPS11/RPL37A/RPL5/RPL35/RPL39/RPS21/RPS2/RPL15/RPL18/RPS25/RPL38/RPL18A/RPS16/RPL12/RPS15A/RPL14/RPS12/RPL36/RPS5/RPLP2/RPLP0/RPL23A/RPL27A/RPS3/RPS20/RPL17/RPS15/RPL8/RPL1/RPS14/RPL13/RPS27/RPS24/RPL7/SSR1/SSR2/RPS18                                                      |
| Down dcSsc | GO:0072599 | establishment of protein localization to endoplasmic reticulum     | 68/859    | 122/18670 | 1.50E-58 | 1.79E-55 | RPL6/RPL37/RP58/RPL35A/RPL11/RPL4/RPL34/RPL30/RPL13A/RPL14/RPL13A/RPL19/RPL32/RPL26/RPS6/RPL27/RPL3/RPS29/UBA52/PMM1/RPL7A/RPL31/RPL23/RPS3A/RPS27A/RPL10/RPL24/RPL22/RPS10/RPS17/RPL10A/RPS19/RPS11/RPL37A/RPL5/RPL35/RPL39/RPS21/RPS2/RPL15/RPL18/RPS25/RPL38/RPL18A/RPS16/RPL12/RPS15A/RPL14/RPS12/RPL36/RPS5/RPLP2/RPLP0/RPL23A/RPL27A/RPS3/RPS20/RPL17/RPS15/RPL8/RPL1/RPS14/RPL13/RPS27/RPS24/RPL7/CHMP4A/RPS18                                                    |

|            |            |                                                                                       |        |           |             |             |                                                                                                                                                                                                                                                                                                                                                                                                                                                                                                   |
|------------|------------|---------------------------------------------------------------------------------------|--------|-----------|-------------|-------------|---------------------------------------------------------------------------------------------------------------------------------------------------------------------------------------------------------------------------------------------------------------------------------------------------------------------------------------------------------------------------------------------------------------------------------------------------------------------------------------------------|
| Down dcSSc | GO:000184  | nuclear-transcribed mRNA catabolic process, nonsense-mediated decay                   | 67/859 | 120/18670 | 9.11E-58    | 8.72E-55    | RPL6/RPL37/RPS8/RPL35A/RPL11/RPL4/RPL34/RPL30/RPL13A/RPL19/RPL41/RPL29/RPL32/RPL26/RPS6/RPL27/RPL3/RPS29/UBA52/RPL7A/RPL31/RPL23/RPS3A/RPS27A/RPL10/RPL24/RPL22/RPS10/RPS17/RPL10A/RPS19/RPS11/RPL37A/RPL5/RPL35/RPL39/RPS21/RPS2/RPL15/RPL18/RPS25/RPL38/RPL18A/RPS16/RPL12/RPS15A/RPL14/RPS12/RPL36/RPS5/RPL2/RPLP0/RPL23A/RPL27A/RPS3/RPS20/RPL17/RPS15/RPL8/RPLP1/EIF3E/RPS14/RPL13/RPS27/RPS24/RPL7/RPS18                                                                                    |
| Down dcSSc | GO:0006413 | translational initiation                                                              | 81/859 | 193/18670 | 6.20E-57    | 4.95E-54    | RPL6/RPL37/RPS8/RPL35A/RPL11/RPL4/RPL34/RPL30/RPL13A/RPL19/RPL41/RPL29/RPL32/RPL26/RPS6/RPL27/RPL3/EIF3L/RPS29/UBA52/RPL7A/RPL31/RPL23/RPS3A/RPS27A/RPL10/RPL24/RPL22/RPS10/RPS17/RPL10A/RPS19/RPS11/RPL37A/RPL5/RPL35/RPL39/RPS21/ATF4/RPS2/EIF1/RPL15/RPL18/RPS25/RPL38/RPL18A/EIF3I/RPS16/RPL12/RPS15A/RPL14/RPS12/EIF3H/RPL36/CCL5/RBM4/RPS5/RPLP2/RPLP0/RPL23A/RPL27A/YTHDF3/RPS3/RPS20/RPL17/EIF2D/IMPACT/RPS15/RPL8/RPLP1/EIF3E/RPS14/EIF4B/RPL13/RPS27/RPS24/EIF3G/EIF3K/RPL7/EIF3F/RPS18 |
| Down dcSSc | GO:0019080 | viral gene expression                                                                 | 78/859 | 191/18670 | 9.69E-54    | 6.62E-51    | RPL6/RPL37/RPS8/RPL35A/RPL11/RPL4/RPL34/RPL30/RPL13A/RPL19/RPL41/RPL29/RPL32/RPL26/RPS6/RPL27/RPL3/EIF3L/RPS29/UBA52/RPL7A/RPL31/RPL23/RPS3A/RPS27A/RPL10/RPL24/RPL22/RPS10/CCNT1/RPS17/RPL10A/RPS19/RPS11/RPL37A/RPL5/RPL35/SUPT4H1/RPL39/RPS21/RPS2/RPL15/RPL18/CDK9/RPS25/RPL38/RPL18A/RPS16/RPL12/RPS15A/RPL14/RPS12/RPL36/CCL5/RPS5/RPLP2/RPLP0/CCL4/RPL23A/RPL27A/RPS3/RPS20/RPL17/EIF2D/RPS15/RPL8/RPL1/RPL11/USF2/POLR2J/RPS14/RPL13/RPS27/RPS24/EIF3G/RPL7/RSF1/EIF3F/RPS18              |
| Down dcSSc | GO:0019083 | viral transcription                                                                   | 74/859 | 177/18670 | 6.75E-52    | 4.04E-49    | RPL6/RPL37/RPS8/RPL35A/RPL11/RPL4/RPL34/RPL30/RPL13A/RPL19/RPL41/RPL29/RPL32/RPL26/RPS6/RPL27/RPL3/RPS29/UBA52/RPL7A/RPL31/RPL23/RPS3A/RPS27A/RPL10/RPL24/RPL22/RPS10/CCNT1/RPS17/RPL10A/RPS19/RPS11/RPL37A/RPL5/RPL35/SUPT4H1/RPL39/RPS21/RPS2/RPL15/RPL18/CDK9/RPS25/RPL38/RPL18A/RPS16/RPL12/RPS15A/RPL14/RPS12/RPL36/CCL5/RPS5/RPLP2/RPLP0/CCL4/RPL23A/RPL27A/RPS3/RPS20/RPL17/RPS15/RPL8/RPL1/USF2/POLR2J/RPS14/RPL13/RPS27/RPS24/RPL7/RSF1/RPS18                                            |
| Down dcSSc | GO:0042255 | ribosome assembly                                                                     | 20/859 | 63/18670  | 3.00E-12    | 8.46E-10    | RPL6/RPL11/RPL3/RPL10/RPL24/RPS10/RPS19/SBDS/RPL5/RPL38/RPL12/RPLP0P6/RPS5/RPLP0/RPL23A/MTERF4/RPS15/RPS14/RPS27/MRPL11                                                                                                                                                                                                                                                                                                                                                                           |
| Down dcSSc | GO:0042273 | ribosomal large subunit biogenesis                                                    | 20/859 | 71/18670  | 3.54E-11    | 9.42E-09    | RPL6/RPL35A/RPL11/RPL26/RPL3/RPL7A/RPL10/RPL24/RPL10A/RPL5/RPL35/RPL38/RPL12/RPL14/RPLP0P6/RPLP0/RPL23A/RSL1D1/RPL7/MRPL11                                                                                                                                                                                                                                                                                                                                                                        |
| Down dcSSc | GO:0071826 | ribonucleoprotein complex subunit organization                                        | 39/859 | 291/18670 | 2.00E-09    | 4.56E-07    | RPL6/RPL11/RPL13A/CIRBP/RPL3/EIF3L/RPL10/RPL24/RPS10/RPS19/SBDS/RPL5/RNVU1-6/RPL38/EIF3I/RPL12/EIF3H/RPLP0P6/RPS5/SNRPD2/RPLP0/RPL23A/MTERF4/LSM4/EIF2D/RPS15/EIF3E/RPS14/EIF4B/RNU4ATAC/RPS27/ZFAND1/EIF3G/EIF3K/MRP L11/PRPF18/GEMIN4/EIF3F/SNRPE                                                                                                                                                                                                                                               |
| Down dcSSc | GO:0006364 | rRNA processing                                                                       | 30/859 | 214/18670 | 5.27E-08    | 1.10E-05    | RPS8/RPL35A/RPL11/RPL26/RPS6/RPL27/RPL7A/RPS17/RPL10A/RPS19/SBDS/FBL/RPL5/RPL35/RPS21/RPS2/RPS16/RPL14/NSA2/SUV39H1/RSL1D1/MTERF4/RPS15/RPS14/RPS27/RPS24/RBFA/RPL7/METT16/GEMIN4                                                                                                                                                                                                                                                                                                                 |
| Down dcSSc | GO:0090200 | positive regulation of release of cytochrome c from mitochondria                      | 9/859  | 30/18670  | 5.29E-06    | 0.000938357 | BMF/CHCHD10/FAM162A/PLAUR/PMAIP1/BCL2L11/BAX/BAD/BID                                                                                                                                                                                                                                                                                                                                                                                                                                              |
| Down dcSSc | GO:0097711 | ciliary basal body-plasma membrane docking                                            | 16/859 | 95/18670  | 6.39E-06    | 0.00109231  | TTBK2/HAUS7/TCTN1/PCNT/CC2D2A/TUBA1A/SSNA1/HAUS5/CDK5RAP2/OFD1/MAPRE1/PLK4/CSNK1E/TMEM67/SDCCAG8/NPHP4                                                                                                                                                                                                                                                                                                                                                                                            |
| Down dcSSc | GO:1904666 | regulation of ubiquitin protein ligase activity                                       | 7/859  | 22/18670  | 3.96E-05    | 0.006110243 | RPL11/RPL23/UBE2S/RPL5/MAD2L2/CDC14B/FZR1                                                                                                                                                                                                                                                                                                                                                                                                                                                         |
| Down dcSSc | GO:1903708 | positive regulation of hemopoiesis                                                    | 21/859 | 185/18670 | 0.000126535 | 0.015943419 | CD4/NFKBID/CD83/PRMT1/TAL1/GNAS/TNFSF9/ZBTB46/EGR3/CD74/BAD/INHBA/CTNNBIP1/TNFSF4/FAM210B/IL1RL2/RUNX3/ID2/ZFP36L1/HMGB1/DUSP10                                                                                                                                                                                                                                                                                                                                                                   |
| Down dcSSc | GO:0002262 | myeloid cell homeostasis                                                              | 18/859 | 147/18670 | 0.000145046 | 0.017807193 | RPS6/RPS17/RPS19/DMTN/PRMT1/TAL1/SH2B3/PDE4B/BCL2L11/BAX/INHBA/RPS14/FAM210B/ID2/SP3/RPS24/ZFP36L1/HMGB1                                                                                                                                                                                                                                                                                                                                                                                          |
| Down dcSSc | GO:1903039 | positive regulation of leukocyte cell-cell adhesion                                   | 23/859 | 218/18670 | 0.000186759 | 0.022355059 | CD4/HLA-DPB1/NFKBID/HLA-DPA1/CD83/NR4A3/TNFSF9/GRAP2/CCL5/EGR3/ICAM1/CD74/BAD/RPS3/PDPK1/TNFSF4/IL1RL2/RUNX3/HLA-DMB/AIF1/IL1B/HMGB1/DUSP10                                                                                                                                                                                                                                                                                                                                                       |
| Down dcSSc | GO:0042110 | T cell activation                                                                     | 39/859 | 464/18670 | 0.000220979 | 0.025806037 | RPS6/CD4/HLA-DPB1/NFKBID/RPL22/HLA-DPA1/CD83/HLA-DOA/HFE/PTGER4/TNFSF9/GRAP2/CCL5/BAX/NRARP/CLEC4A/EGR3/ICAM1/CD74/BAD/RPS3/NCAPH2/PDPK1/PRDX2/TNFSF4/IL1RL2/RUNX3/SP3/SLA2/RELB/ZFP36L1/HLA-DMB/AIF1/IL1B/NFATC2/SH3RF1/HMGB1/GSN/DUSP10                                                                                                                                                                                                                                                         |
| Down dcSSc | GO:0045619 | regulation of lymphocyte differentiation                                              | 19/859 | 169/18670 | 0.000295168 | 0.033649155 | NFKBID/CD83/HLA-DOA/TNFSF9/NRARP/EGR3/CD74/BAD/INHBA/PRDX2/TNFSF4/IL1RL2/RUNX3/ID2/ZFP36L1/NFATC2/SH3RF1/HMGB1/DUSP10                                                                                                                                                                                                                                                                                                                                                                             |
| Down dcSSc | GO:0001844 | protein insertion into mitochondrial membrane involved in apoptotic signaling pathway | 7/859  | 30/18670  | 0.000342209 | 0.036411064 | BMF/SFN/PMAIP1/BCL2L11/BAX/BAD/BID                                                                                                                                                                                                                                                                                                                                                                                                                                                                |
| Down dcSSc | GO:0071470 | cellular response to osmotic stress                                                   | 8/859  | 40/18670  | 0.000402592 | 0.041013014 | PTGS2/SLC2A1/MBIP/BAD/MYLK/RELB/ZFP36L1/AKR1B1                                                                                                                                                                                                                                                                                                                                                                                                                                                    |
| Up eaSSc   | GO:0000280 | nuclear division                                                                      | 58/861 | 407/18670 | 1.62E-14    | 4.01E-11    | SPAG5/SMC4/MYBL2/USP16/KIFC1/SPHK1/ANAPC4/CDC45/CDC20/TTN/CEP192/PLK1/TOP2A/KNTC1/TTK/PDS5B/CUL3/KIF23/MKI67/NUSAP1/CLASP2/VPS4B/CCN A1/KIF2C/MUS81/NCAPG/RGCC/POG2/SIRT7/NDC80/CENPK/MASTL/CENPE/CHK1/NCAPH/WNT4/EDN1/SLX4/GEN1/ASPM/TOP2B/SEH1/DLGAP5/KIF18B/PTTG2/BIRC5/FANCM/PHF13/FZR1/CDKN1C/HSPA2/CENPF/FGF8/CDC27/ANLN/KIF11/RAD51C                                                                                                                                                       |
| Up eaSSc   | GO:0006260 | DNA replication                                                                       | 46/861 | 274/18670 | 2.17E-14    | 4.01E-11    | CHTF18/POLE2/MCM8/CDK1/POLQ/DONSON/TOP1/THOC1/TSPYL2/RECQL/WHDH3/CD45/ATR/LIG1/ORC6/NUP98/MCM7/RECQL4/PNKP/DNAJC2/POLE/INGS/AC HE/DTL/MCM4/BRCA2/CHEK1/REV3L/POLD1/POLG2/MSH6/MCM10/RRM2/SLX4/IGHMBP2/GEN1/TOP3A/HUS1/SIN3A/EXO1/E2F8/FANCM/ORC2/TICRR/CCNA2/N BN                                                                                                                                                                                                                                 |
| Up eaSSc   | GO:0140014 | mitotic nuclear division                                                              | 45/861 | 264/18670 | 2.37E-14    | 4.01E-11    | SPAG5/SMC4/MYBL2/USP16/KIFC1/SPHK1/ANAPC4/CDC45/CDC20/TTN/CEP192/PLK1/KNTC1/TTK/PDS5B/CUL3/KIF23/MKI67/NUSAP1/CLASP2/VPS4B/KIF2C/NCAP G/RGCC/POG2/SIRT7/NDC80/CENPK/CENPE/CHK1/NCAPH/EDN1/GEN1/SEH1/DLGAP5/KIF18B/PTTG2/BIRC5/PHF13/CDKN1C/CENPF/FGF8/CDC27/ANLN/KIF11                                                                                                                                                                                                                            |
| Up eaSSc   | GO:1901987 | regulation of cell cycle phase transition                                             | 62/861 | 480/18670 | 1.87E-13    | 1.82E-10    | PCM1/ANAPC4/PSME4/RINT1/DCUN1D3/DYRK3/CDC45/CDC20/USP47/BRD4/CEP192/CEP152/CDK1/PLK1/KNTC1/TTK/WNT10B/DONSON/CUL3/CSNK1D/VPS4B/MI R221/CD45/SF1/RGCC/NDC80/E2F1/RCC2/CENPE/DTL/CCND2/CHEK1/ZNF655/DACT1/GPR132/MECP2/GEN1/TPRA1/GTSE1/PAFAH1B1/EP300/CDK5RAP3/D LGAP5/HUS1/SIN3A/GIGYF2/YWHAG/E2F8/FZR1/CDKN1C/TICRR/FBXO7/HSPA2/CENPF/CDC27/ANLN/NBN/EZH2/CDK10/RAD51C/RIPK1                                                                                                                     |
| Up eaSSc   | GO:0000075 | cell cycle checkpoint                                                                 | 39/861 | 216/18670 | 1.95E-13    | 1.82E-10    | RINT1/CDC20/CDK1/PLK1/TOP2A/KNTC1/TTK/DONSON/THOC1/CCAR2/CDC45/ATR/MUS81/WDR76/CDC5L/RGCC/NDC80/E2F1/DTL/CHEK1/DDX39B/DLG1/NSUN2/INTS7/GEN1/GTSE1/TOP2B/EP300/CDK5RAP3/DOT1L/HUS1/GIGYF2/MDC1/E2F8/USP28/FZR1/TICRR/CENPF/NBN                                                                                                                                                                                                                                                                     |
| Up eaSSc   | GO:1901990 | regulation of mitotic cell cycle phase transition                                     | 59/861 | 444/18670 | 2.15E-13    | 1.82E-10    | PCM1/ANAPC4/PSME4/RINT1/DCUN1D3/CDC45/CDC20/USP47/BRD4/CEP192/CEP152/CDK1/PLK1/KNTC1/TTK/WNT10B/DONSON/CUL3/CSNK1D/VPS4B/MI R221/C DC45/SF1/RGCC/NDC80/E2F1/RCC2/CENPE/DTL/CCND2/ZNF655/DACT1/GPR132/MECP2/GEN1/TPRA1/GTSE1/PAFAH1B1/EP300/CDK5RAP3/DLGAP5/HUS1/SIN3A/ GIGYF2/YWHAG/E2F8/FZR1/CDKN1C/TICRR/FBXO7/HSPA2/CENPF/CDC27/ANLN/NBN/EZH2/CDK10/RAD51C/RIPK1                                                                                                                               |
| Up eaSSc   | GO:0044839 | cell cycle G2/M phase transition                                                      | 42/861 | 266/18670 | 2.46E-12    | 1.56E-09    | PCM1/PSME4/RINT1/DYRK3/USP47/BRD4/CEP192/CEP152/CDK1/PLK1/WNT10B/DONSON/CSNK1D/PPP1CB/VPS4B/SF1/TAF2/RCC2/MASTL/BACH1/DTL/CHEK1/AB CB1/GPR132/MECP2/GTSE1/PAFAH1B1/CDK5RAP3/CIT/HUS1/SIN3A/PPP2R2A/YWHAG/MELK/FBXL18/FZR1/TICRR/HSPA2/CCNA2/CENPF/NBN/RAD51C                                                                                                                                                                                                                                      |
| Up eaSSc   | GO:0000819 | sister chromatid segregation                                                          | 34/861 | 189/18670 | 7.69E-12    | 3.90E-09    | SPAG5/SMC4/KIFC1/ANAPC4/CDC45/CDC20/TTN/PLK1/TOP2A/TTK/SFPQ/PDS5B/CUL3/KIF23/NUSAP1/VPS4B/KIF2C/NCAPG/POG2/NDC80/CENPK/CENPE/NCAPH/C TNNB1/GEN1/TOP2B/SEH1/DLGAP5/KIF18B/PTTG2/PHF13/CENPF/CDC27/RAD51C                                                                                                                                                                                                                                                                                           |

|            |            |                                                                     |        |           |          |          |                                                                                                                                                                                                                                                                                                                                                                                                                                                                                                           |
|------------|------------|---------------------------------------------------------------------|--------|-----------|----------|----------|-----------------------------------------------------------------------------------------------------------------------------------------------------------------------------------------------------------------------------------------------------------------------------------------------------------------------------------------------------------------------------------------------------------------------------------------------------------------------------------------------------------|
| Up eaSSc   | GO:0033044 | regulation of chromosome organization                               | 46/861 | 342/18670 | 6.72E-11 | 2.28E-08 | ANAPC4/CDC45/CDC20/BRD4/SUPT6H/PLK1/TOP2A/ATAD2/TTK/TRIP12/SFPQ/FMR1/XRN1/CUL3/MKI67/ZNF335/CDC45/ATR/NDC80/PNKP/DHX36/CENPE/CHEK1/FOX3/PAF1/MECP2/PHF1/ATAD2B/RIF1/CTNNB1/VEGFA/SLX4/GEN1/CCT2/EED/DLGAP5/SIN3A/USP7/PTTG2/SKI/YLPM1/CENPF/CDC27/NBN/SMG1/MAP3K4                                                                                                                                                                                                                                         |
| Up eaSSc   | GO:0000077 | DNA damage checkpoint                                               | 27/861 | 145/18670 | 4.94E-10 | 1.39E-07 | RINT1/CDK1/PLK1/DONSON/THOC1/CCAR2/ATR/MUS81/WDR76/CDC5L/RGCC/E2F1/DTL/CHEK1/DDX39B/INTS7/GTSE1/EP300/CDK5RAP3/DOT1L/HUS1/GIGYF2/MDC1/E2F8/USP28/FZR1/NBN                                                                                                                                                                                                                                                                                                                                                 |
| Up eaSSc   | GO:0016569 | covalent chromatin modification                                     | 51/861 | 474/18670 | 1.69E-08 | 3.44E-06 | PRMT9/USP36/USP16/CHD1/BRD4/SUPT6H/CDK1/TRIP12/RLF/SFPQ/FMR1/HELLS/KDM6B/YEATS2/LDB1/KANSL3/MORF4L2/ZNF335/JMJD1C/SIRT7/KDM3B/HCF1/ING5/PER2/BRCA2/ING3/CHEK1/FOX3/KMT2C/PAF1/MECP2/UHRF1/PRDM2/PHF1/RIF1/CTNNB1/VEGFA/GTF2B/EP300/EED/DOT1L/SIN3A/HR/USP7/JMJD6/SKI/PRMT3/BAZ1B/BEND3/CCNA2/EZH2                                                                                                                                                                                                         |
| Up eaSSc   | GO:0016570 | histone modification                                                | 49/861 | 454/18670 | 2.94E-08 | 5.33E-06 | PRMT9/USP36/USP16/BRD4/SUPT6H/CDK1/TRIP12/RLF/SFPQ/FMR1/KDM6B/YEATS2/LDB1/KANSL3/MORF4L2/ZNF335/JMJD1C/SIRT7/KDM3B/HCF1/ING5/PER2/BRCA2/ING3/CHEK1/FOX3/KMT2C/PAF1/MECP2/UHRF1/PRDM2/PHF1/RIF1/CTNNB1/VEGFA/GTF2B/EP300/EED/DOT1L/SIN3A/HR/USP7/JMJD6/SKI/PRMT3/BAZ1B/BEND3/CCNA2/EZH2                                                                                                                                                                                                                    |
| Up eaSSc   | GO:0045930 | negative regulation of mitotic cell cycle                           | 39/861 | 338/18670 | 1.36E-07 | 2.17E-05 | PSME4/RINT1/DCUN1D3/CDC20/USP47/CDK1/PLK1/TOP2A/KNTC1/TTK/DONSON/TNF/MUS81/RGCC/NDC80/E2F1/CHEK1/ZNF655/DLG1/DACT1/GPR132/CTNNB1/GEN1/TPRA1/GTSE1/TOP2B/EP300/CDK5RAP3/HUS1/GIGYF2/MDC1/PTTG2/E2F8/TICRR/FBXO7/CENPF/NBN/EZH2/RIPK1                                                                                                                                                                                                                                                                       |
| Up eaSSc   | GO:0007088 | regulation of mitotic nuclear division                              | 25/861 | 164/18670 | 1.38E-07 | 2.17E-05 | SPHK1/ANAPC4/CDC45/CDC20/PLK1/KNTC1/TTK/CUL3/MKI67/NUSAP1/VPS4B/RGCC/NDC80/CENPE/CHEK1/EDN1/GEN1/DLGAP5/PTTG2/CDKN1C/CENPF/FGF8/CD27/ANLN/KIF11                                                                                                                                                                                                                                                                                                                                                           |
| Up eaSSc   | GO:0006406 | mRNA export from nucleus                                            | 20/861 | 111/18670 | 1.53E-07 | 2.17E-05 | RANBP2/NUP54/DHX38/SUPT6H/NUP153/THOC1/YTHDC1/NUP155/NUP107/NUP160/CPSF2/NUP98/DDX39B/POM121/AGFG1/SEH1L/SRSF11/EIF4E/NCBP2/SMG1                                                                                                                                                                                                                                                                                                                                                                          |
| Up eaSSc   | GO:0071427 | mRNA-containing ribonucleoprotein complex export from nucleus       | 20/861 | 111/18670 | 1.53E-07 | 2.17E-05 | RANBP2/NUP54/DHX38/SUPT6H/NUP153/THOC1/YTHDC1/NUP155/NUP107/NUP160/CPSF2/NUP98/DDX39B/POM121/AGFG1/SEH1L/SRSF11/EIF4E/NCBP2/SMG1                                                                                                                                                                                                                                                                                                                                                                          |
| Up eaSSc   | GO:0051783 | regulation of nuclear division                                      | 27/861 | 188/18670 | 1.54E-07 | 2.17E-05 | SPHK1/ANAPC4/CDC45/CDC20/PLK1/KNTC1/TTK/CUL3/MKI67/NUSAP1/VPS4B/RGCC/NDC80/CENPE/CHEK1/WNT4/EDN1/GEN1/DLGAP5/PTTG2/FZR1/CDKN1C/CENPF/FGF8/CD27/ANLN/KIF11                                                                                                                                                                                                                                                                                                                                                 |
| Up eaSSc   | GO:0007093 | mitotic cell cycle checkpoint                                       | 25/861 | 165/18670 | 1.55E-07 | 2.17E-05 | RINT1/CDC20/CDK1/PLK1/TOP2A/KNTC1/TTK/DONSON/MUS81/RGCC/NDC80/E2F1/DLG1/GEN1/GTSE1/TOP2B/EP300/CDK5RAP3/HUS1/GIGYF2/MDC1/E2F8/TICRR/CENPF/NBN                                                                                                                                                                                                                                                                                                                                                             |
| Up eaSSc   | GO:0044766 | multi-organism transport                                            | 16/861 | 73/18670  | 1.62E-07 | 2.17E-05 | RANBP2/NUP54/NUP153/FMR1/THOC1/NUP155/NUP107/NUP160/NUP98/UBAP1/KPNA2/DDX39B/VPS37B/POM121/SEH1L/TSG101                                                                                                                                                                                                                                                                                                                                                                                                   |
| Up eaSSc   | GO:1902579 | multi-organism localization                                         | 16/861 | 73/18670  | 1.62E-07 | 2.17E-05 | RANBP2/NUP54/NUP153/FMR1/THOC1/NUP155/NUP107/NUP160/NUP98/UBAP1/KPNA2/DDX39B/VPS37B/POM121/SEH1L/TSG101                                                                                                                                                                                                                                                                                                                                                                                                   |
| Down eaSSc | GO:0006613 | cotranslational protein targeting to membrane                       | 68/723 | 109/18670 | 1.72E-68 | 3.74E-65 | RPL6/RPL11/RPL22/RPL37/RPL4/RPL3/RPL7A/RPS25/RPL30/RPL32/RPS8/RPL19/RPL26/RPS17/UBA52/RPS20/RPL35A/RPL24/RPL34/RPL41/RPL15/RPS12/RPL10A/RP S6/RPL29/RPS2/RPL27/RPL13A/RPL23/RPL35/RPS27A/RPL5/RPL10/RPL31/RPL23A/RPL37A/RPS29/RPL12/RPS11/RPL38/RPLP0/RPS3/RPLP1/RPLP2/RPL14/RPS14/RP L18A/RPS15A/RPS24/RPL36/SRP14/RPL18/RPS16/RPS10/RPS15/RPS21/RPL8/SSR2/RPS19/RPS23/RPS27/RPL13/RPS3A/RPS26/RPS18/RPS5/RPL27A/RPS9                                                                                    |
| Down eaSSc | GO:0006614 | SRP-dependent cotranslational protein targeting to membrane         | 67/723 | 105/18670 | 1.76E-68 | 3.74E-65 | RPL6/RPL11/RPL22/RPL37/RPL4/RPL3/RPL7A/RPS25/RPL30/RPL32/RPS8/RPL19/RPL26/RPS17/UBA52/RPS20/RPL35A/RPL24/RPL34/RPL41/RPL15/RPS12/RPL10A/RP S6/RPL29/RPS2/RPL27/RPL13A/RPL23/RPL35/RPS27A/RPL5/RPL10/RPL31/RPL23A/RPL37A/RPS29/RPL12/RPS11/RPL38/RPLP0/RPS3/RPLP1/RPLP2/RPL14/RPS14/RP L18A/RPS15A/RPS24/RPL36/SRP14/RPL18/RPS16/RPS10/RPS15/RPS21/RPL8/RPS19/RPS23/RPS27/RPL13/RPS3A/RPS26/RPS18/RPS5/RPL27A/RPS9                                                                                         |
| Down eaSSc | GO:0072599 | establishment of protein localization to endoplasmic reticulum      | 69/723 | 122/18670 | 3.07E-65 | 3.26E-62 | RPL6/RPL11/RPL22/RPL37/RPL4/RPL3/RPL7A/RPS25/RPL30/RPL32/RPS8/RPL19/RPL26/RPS17/UBA52/RPS20/RPL35A/RPL24/RPL34/RPL41/RPL15/RPS12/RPL10A/RP S6/RPL29/RPS2/RPL27/RPL13A/RPL23/RPL35/RPS27A/RPL5/RPL10/RPL31/RPL23A/RPL37A/RPS29/RPL12/RPS11/RPL38/RPLP0/RPS3/RPLP1/RPLP2/RPL14/RPS14/RP L18A/RPS15A/RPS24/RPL36/SRP14/RPL18/RPS16/RPS10/RPS15/RPS21/RPL8/RPS19/RPS23/SPCS1/RPS27/RPL13/RPS3A/RPS26/RPS18/RPS5/RPL27A/RPS9/PMM1                                                                              |
| Down eaSSc | GO:0000184 | nuclear-transcribed mRNA catabolic process, nonsense-mediated decay | 68/723 | 120/18670 | 2.24E-64 | 1.90E-61 | RPL6/RPL11/RPL22/RPL37/RPL4/RPL3/RPL7A/RPS25/RPL30/RPL32/RPS8/RPL19/RPL26/RPS17/UBA52/RPS20/RPL35A/RPL24/RPL34/RPL41/RPL15/RPS12/RPL10A/RP S6/RPL29/RPS2/RPL27/RPL13A/RPL23/RPL35/RPS27A/RPL5/RPL10/RPL31/RPL23A/EIF3E/RPL37A/RPS29/RPL12/RPS11/RPL38/RPLP0/RPS3/RPLP1/RPLP2/RPL14/RPS 14/RPL18A/RPS15A/RPS24/RPL36/RPL18/RPS16/RPS10/RPS15/RPS21/RPL8/RPS19/RPS23/RPS27/RPL13/RPS3A/RPS26/RPS18/RPS5/RPL27A/RPS9/DCP1B                                                                                   |
| Down eaSSc | GO:0006413 | translational initiation                                            | 82/723 | 193/18670 | 2.85E-64 | 2.02E-61 | RPL6/RPL11/RPL22/EIF31/RPL37/RPL4/RPL3/RPL7A/RPS25/RPL30/RPL32/RPS8/RPL19/RPL26/RPS17/UBA52/RPS20/RPL35A/RPL24/EIF3L/RPL34/RPL41/RPL15/RPS12 /RPL10A/EIF3H/RPS6/RPL29/RPS2/RPL27/RPL13A/RPL23/RPL35/RPS27A/RPL5/RPL10/RPL31/RPL23A/EIF3E/RPL37A/RPS29/RPL12/RPS11/RPL38/RPLP0/RPS3/RPLP1 /RPLP2/RPL14/RPS14/RPL18A/NCK2/RPS15A/RPS24/RPL36/RPL18/EIF3G/RPS16/RPS10/EIF3D/RPS15/RPS21/RPL8/RPS19/CCL5/RPS23/EIF2D/EIF2S2/RPS27/R PL13/RPS3A/RPS26/RPS18/RPS5/RPL27A/EIF3M/RPS9/IMPACT/EIF2AK1/POLR2G/EIF2A |
| Down eaSSc | GO:0019080 | viral gene expression                                               | 74/723 | 191/18670 | 1.81E-54 | 9.60E-52 | RPL6/RPL11/RPL22/RPL37/RPL4/RPL3/RPL7A/RPS25/RPL30/RPL32/RPS8/RPL19/RPL26/RPS17/UBA52/RPS20/RPL35A/RPL24/EIF3L/RPL34/RPL41/RPL15/RPS12/RPL1 0A/RPS6/RPL29/RPS2/RPL27/RPL13A/RPL23/RPL35/RPS27A/RPL5/RPL10/RPL31/RPL23A/RPL37A/RPS29/RPL12/RPS11/RPL38/RPLP0/RPS3/RPLP1/RPLP2/RPL14/RPS 14/RPL18A/RPS15A/RPS24/RPL36/RPL18/EIF3G/RPS16/RPS10/EIF3D/RPS15/RPS21/RPL8/RPS19/CCL5/RPS23/EIF2D/RPS27/RPL13/HDAC1/RPS3A/RPS26/RPS18/RPS 5/SUPT4H1/RPL27A/RPS9/POLR2G                                            |
| Down eaSSc | GO:0019083 | viral transcription                                                 | 70/723 | 177/18670 | 2.84E-52 | 1.20E-49 | RPL6/RPL11/RPL22/RPL37/RPL4/RPL3/RPL7A/RPS25/RPL30/RPL32/RPS8/RPL19/RPL26/RPS17/UBA52/RPS20/RPL35A/RPL24/RPL34/RPL41/RPL15/RPS12/RPL10A/RP S6/RPL29/RPS2/RPL27/RPL13A/RPL23/RPL35/RPS27A/RPL5/RPL10/RPL31/RPL23A/RPL37A/RPS29/RPL12/RPS11/RPL38/RPLP0/RPS3/RPLP1/RPLP2/RPL14/RPS14/RP L18A/RPS15A/RPS24/RPL36/RPL18/RPS16/RPS10/RPS15/RPS21/RPL8/RPS19/CCL5/RPS23/RPS27/RPL13/HDAC1/RPS3A/RPS26/RPS18/RPS5/SUPT4H1/RPL27A/RPS9 /POLR2G                                                                    |
| Down eaSSc | GO:0042254 | ribosome biogenesis                                                 | 52/723 | 297/18670 | 3.60E-20 | 9.00E-18 | RPL6/RPL11/RPL3/RPL7A/FBL/RPS8/RPL26/RPS17/RPL35A/RPL24/RPL10A/C1QB/MRPL11/RPS2/RPL27/RPL35/RPL5/RPL10/RPL23A/RPL12/RPL38/RPLP0/RPL 14/RPLP0P6/RPS14/RSL1D1/ZNHIT3/RPS24/RPS16/RPS10/RPS15/RPS21/RPS19/NSA2/EXOSC5/RPS27/NHP2/IMP4/NIP7/RPS5/RPS9/PA2G4/RSL24D1/EXOSC7/RRP3 6/MRPL20/NOP16/NUDT16/TRMT112/MRPS2/EIF2A                                                                                                                                                                                     |
| Down eaSSc | GO:0022618 | ribonucleoprotein complex assembly                                  | 49/723 | 277/18670 | 2.89E-19 | 6.82E-17 | RPL6/RPL11/EIF31/RPL3/RPL24/EIF3L/SNRPD3/EIF3H/C1QB/MRPL11/RPL13A/RPL5/SNRPF/RPL10/RPL23A/EIF3E/SNRPC/SNRPD2/RPL12/RPL38/CLNS1A/RPLP0/RPL P0P6/RPS14/ZNHIT3/EIF3K/EIF3G/RPS10/EIF3D/RPS15/STYXL1/RPS19/RPS23/EIF2D/EIF2S2/GEMIN7/RUVBL1/RPS27/TXNL4A/NIP7/SNRPD1/SNRPE/RPS5/EIF3M/RS L24D1/LSM4/MRPL20/MRPS2/EIF2A                                                                                                                                                                                        |
| Down eaSSc | GO:0071826 | ribonucleoprotein complex subunit organization                      | 50/723 | 291/18670 | 4.48E-19 | 1.00E-16 | RPL6/RPL11/EIF31/RPL3/RPL24/EIF3L/SNRPD3/EIF3H/C1QB/MRPL11/RPL13A/RPL5/SNRPF/RPL10/RPL23A/EIF3E/SNRPC/SNRPD2/RPL12/RPL38/CLNS1A/RPLP0/RPL P0P6/RPS14/ZNHIT3/EIF3K/EIF3G/RPS10/EIF3D/RPS15/STYXL1/RPS19/RPS23/EIF2D/EIF2S2/GEMIN7/RUVBL1/RPS27/TXNL4A/NIP7/SNRPD1/SNRPE/RPS5/E IF3M/RSL24D1/LSM4/MRPL20/MRPS2/EIF2A                                                                                                                                                                                        |
| Down eaSSc | GO:0042775 | mitochondrial ATP synthesis coupled electron transport              | 28/723 | 97/18670  | 2.57E-17 | 4.96E-15 | UQCRC1/COX7C/UQCRCB/COX6C/COX5A/COX6A1/NDUFS4/NDUFAB1/UQCRC10/NDUFA6/COX6B1/NDUFC1/COX7A2L/NDUFC2/NDUFB4/NDUFS2/COX411/UQCRCQ/UQ CRC2/SDHA/NDUFB5/NDUFV1/COQ9/UQCRCR/NDUFA1/COX5B/SDHC/NDUFB2                                                                                                                                                                                                                                                                                                             |
| Down eaSSc | GO:0022904 | respiratory electron transport chain                                | 29/723 | 117/18670 | 6.26E-16 | 1.11E-13 | UQCRC1/COX7C/UQCRCB/COX6C/COX5A/COX6A1/NDUFS4/NDUFAB1/UQCRC10/NDUFA6/COX6B1/NDUFC1/COX7A2L/NDUFC2/SDHB/NDUFB4/NDUFS2/COX411/UQC RQ/UQCRC2/SDHA/NDUFB5/NDUFV1/COQ9/UQCRCR/NDUFA1/COX5B/SDHC/NDUFB2                                                                                                                                                                                                                                                                                                         |
| Down eaSSc | GO:0006364 | rRNA processing                                                     | 33/723 | 214/18670 | 1.12E-11 | 1.53E-09 | RPL11/RPL7A/FBL/RPL26/RPS17/RPL35A/RPL10A/RPS6/RPS2/RPL27/RPL35/RPL5/RPL14/RPS14/RSL1D1/ZNHIT3/RPS24/RPS16/RPS15/RPS21/RPS19/NSA2/EX OSC5/RPS27/NHP2/IMP4/RPS9/PA2G4/EXOSC7/RRP36/NUDT16/TRMT112                                                                                                                                                                                                                                                                                                          |

|                   |            |                                                                     |        |           |          |             |                                                                                                                                                                                                                                                                               |
|-------------------|------------|---------------------------------------------------------------------|--------|-----------|----------|-------------|-------------------------------------------------------------------------------------------------------------------------------------------------------------------------------------------------------------------------------------------------------------------------------|
| <b>Down eaSSc</b> | GO:0009144 | purine nucleoside triphosphate metabolic process                    | 38/723 | 342/18670 | 5.56E-09 | 6.21E-07    | UQCR11/COX7C/UQCRB/COX6C/COX5A/COX6A1/NDUF54/GAPDH/NDUFAB1/UQCR10/NDUFA6/COX6B1/NDUFC1/COX7A2L/NDUFC2/NDUFB4/NDUFS2/COX41/IMPDH2/UQCRQ/NDME1/UQCRC2/TREX1/ADK/SDHA/NDUFB5/NDUFV1/COQ9/UQCRH/NDUFA1/COX5B/NUDT16/SDHC/NDUFB2/TMSB4X/ENO4/MOCS2/PGAM1                           |
| <b>Down eaSSc</b> | GO:0140053 | mitochondrial gene expression                                       | 23/723 | 162/18670 | 7.28E-08 | 6.45E-06    | MRPS33/C1QBP/MRPL11/RPUSD3/MRPL16/MRPL15/MRPL37/DAP3/MRPL21/OXA1L/MRPL34/MRPL18/MRPL24/MRPS15/MRPL28/MRPL33/MRPL40/MRPL20/MRPS2/MRPL51/MRPS16/MRPL45/MRPL43                                                                                                                   |
| <b>Down eaSSc</b> | GO:0033108 | mitochondrial respiratory chain complex assembly                    | 17/723 | 96/18670  | 1.46E-07 | 1.22E-05    | UQCRB/NDUF54/NDUFAB1/UQCR10/NDUFA6/NDUFC1/NDUFC2/NDUFB4/NDUFS2/OXA1L/SMIM20/NDUFB5/NDUFV1/TIMMDC1/NDUFA1/PET117/NDUFB2                                                                                                                                                        |
| <b>Down eaSSc</b> | GO:0042119 | neutrophil activation                                               | 43/723 | 498/18670 | 8.27E-07 | 6.25E-05    | PSMB7/SERPINB6/PGRMC1/LAMTOR2/ALAD/TRAPPC1/EEF1A1/FOLR3/LILRA2/SRP14/GSTP1/DDOST/VAMP8/PRDX6/CCL5/RAB3D/NDUFC2/PGM2/TIMP2/CAP1/EEF2/HEBP2/IMPDH2/HMOX2/PRDX4/ATP6AP2/DNASE1L3/QPCT/SYNGR1/GMFG/RAB5B/PA2G4/HLA-H/GLB1/PYCARD/APRT/SERPINB1/MMP25/CEACAM3/VCL/PGAM1/OSTF1/IL18 |
| <b>Down eaSSc</b> | GO:0043624 | cellular protein complex disassembly                                | 25/723 | 217/18670 | 1.17E-06 | 8.43E-05    | MRPS33/MRPL11/DMTN/C12orf65/MRPL16/MRPL15/MRPL37/CAPZB/DAP3/MRPL21/OXA1L/MRPL34/MRPL18/MRPL24/MRPS15/MRPL28/MRPL33/MRPL40/MRPL20/TRMT112/MRPS2/MRPL51/MRPS16/MRPL45/MRPL43                                                                                                    |
| <b>Down eaSSc</b> | GO:0002283 | neutrophil activation involved in immune response                   | 41/723 | 488/18670 | 2.96E-06 | 0.000206438 | PSMB7/SERPINB6/PGRMC1/LAMTOR2/ALAD/TRAPPC1/EEF1A1/FOLR3/LILRA2/SRP14/GSTP1/DDOST/VAMP8/PRDX6/RAB3D/NDUFC2/PGM2/TIMP2/CAP1/EEF2/HEBP2/IMPDH2/HMOX2/PRDX4/ATP6AP2/DNASE1L3/QPCT/SYNGR1/GMFG/RAB5B/PA2G4/HLA-H/GLB1/PYCARD/APRT/SERPINB1/MMP25/CEACAM3/VCL/PGAM1/OSTF1           |
| <b>Down eaSSc</b> | GO:0002446 | neutrophil mediated immunity                                        | 40/723 | 499/18670 | 1.20E-05 | 0.000807639 | PSMB7/SERPINB6/PGRMC1/LAMTOR2/ALAD/TRAPPC1/EEF1A1/FOLR3/SRP14/GSTP1/DDOST/VAMP8/PRDX6/RAB3D/NDUFC2/PGM2/TIMP2/CAP1/EEF2/HEBP2/IMPDH2/HMOX2/PRDX4/ATP6AP2/DNASE1L3/QPCT/SYNGR1/GMFG/RAB5B/PA2G4/HLA-H/GLB1/PYCARD/APRT/SERPINB1/MMP25/CEACAM3/VCL/PGAM1/OSTF1                  |
| <b>Up lcSSc</b>   | GO:0048285 | organelle fission                                                   | 54/824 | 449/18670 | 2.16E-11 | 1.02E-07    | PEX11B/TTK/RMI1/TTN/KNTC1/HORMAD1/CDC20/SEH1L/BIRC5/CEP192/ASPM/FANCM/PCID2/ANAPC4/FANCD2/FIGNL1/CLASP2/BRIP1/KIFC1/NDC80/TOP2A/SMC4/GEN1/SYCP2/CENPE/KIF14/KIF18B/CDC45/NUSAP1/MYBL2/C11orf80/VPS4B/BUB3/CENPK/CIAO1/MEI1/SPAG5/TUBG1/KIF23                                  |
| <b>Up lcSSc</b>   | GO:0007059 | chromosome segregation                                              | 41/824 | 321/18670 | 9.72E-10 | 1.53E-06    | TTK/RMI1/TTN/HORMAD1/CDC20/SEH1L/BIRC5/FANCM/PCID2/ANAPC4/FANCD2/ESCO2/BRIP1/KIFC1/NDC80/TOP2A/SMC4/GEN1/SYCP2/PUM2/SMC6/CENPE/KIF14/KIF18B/CDC45/NUSAP1/MKI67/CDC26/NUP37/KNSTRN/ECT2/SMC2/PTTG2/VPS4B/BUB3/CENPK/CIAO1/MEI1/SPAG5/TUBG1/KIF23                               |
| <b>Up lcSSc</b>   | GO:0000070 | mitotic sister chromatid segregation                                | 25/824 | 151/18670 | 1.09E-08 | 1.03E-05    | TTK/TTN/CDC20/SEH1L/PCID2/ANAPC4/KIFC1/NDC80/SMC4/GEN1/CENPE/KIF14/KIF18B/CDC45/NUSAP1/CDC26/KNSTRN/SMC2/PTTG2/VPS4B/BUB3/CENPK/SPAG5/TUBG1/KIF23                                                                                                                             |
| <b>Up lcSSc</b>   | GO:0006260 | DNA replication                                                     | 35/824 | 274/18670 | 1.64E-08 | 1.23E-05    | RMI1/SLFN11/FANCM/TBRG1/ORC6/POLE2/RECQL/CDK1/POLQ/ESCO2/WDHD1/NBN/BRIP1/MAP2K4/DONSON/PCNA/THOC1/WRN/GEN1/ATR/ZMPSTE24/GMNN/ORC2/RAD51/CCNA2/CDC45/E2F7/NUGGC/RFC3/RPAIN/ORC1/POLG2/RBBP7/POLI/RRM2                                                                          |
| <b>Up lcSSc</b>   | GO:0140014 | mitotic nuclear division                                            | 34/824 | 264/18670 | 2.14E-08 | 1.26E-05    | TTK/TTN/KNTC1/CDC20/SEH1L/BIRC5/CEP192/PCID2/ANAPC4/CLASP2/KIFC1/NDC80/SMC4/GEN1/CENPE/KIF14/KIF18B/CDC45/NUSAP1/MYBL2/MKI67/CDC26/KNSTRN/SMC2/PTTG2/KIF11/VPS4B/BUB3/CENPK/USP16/SPAG5/FGF8/TUBG1/KIF23                                                                      |
| <b>Up lcSSc</b>   | GO:0006403 | RNA localization                                                    | 29/824 | 230/18670 | 3.65E-07 | 0.00015651  | CPSF2/NUP107/NUP160/NUP205/SEH1L/AGFG1/SRSF11/PCID2/XPO5/SHQ1/TCP1/DHX38/THOC1/CETN3/ATR/NUP133/NUP188/TSC1/FMR1/NUP54/NCBP1/NUP37/DHX36/CCT2/RBM26/SMG1/EXOSC10/NCBP2/KIF5C                                                                                                  |
| <b>Up lcSSc</b>   | GO:0051983 | regulation of chromosome segregation                                | 18/824 | 103/18670 | 5.38E-07 | 0.000211293 | TTK/HORMAD1/CDC20/PCID2/ANAPC4/NDC80/GEN1/PUM2/SMC6/CENPE/CDC45/MKI67/CDC26/KNSTRN/ECT2/PTTG2/BUB3/SPAG5                                                                                                                                                                      |
| <b>Up lcSSc</b>   | GO:0031503 | protein-containing complex localization                             | 32/824 | 281/18670 | 9.33E-07 | 0.000338403 | CPSF2/NUP107/NUP160/NUP205/LCA5/SEH1L/GRIPAP1/BIRC5/AGFG1/SRSF11/PCID2/STX7/ICK/TTC30B/DHX38/THOC1/ATR/NUP133/NUP188/TSC1/HSPB11/VPS35/NUP54/NCBP1/PCM1/CEP72/NUP37/ARHGAP44/SMG1/SYJN2BP/NCBP2/KIF5C                                                                         |
| <b>Up lcSSc</b>   | GO:0006405 | RNA export from nucleus                                             | 20/824 | 135/18670 | 1.95E-06 | 0.000657521 | CPSF2/NUP107/NUP160/NUP205/SEH1L/AGFG1/SRSF11/PCID2/XPO5/DHX38/THOC1/NUP133/NUP188/TSC1/NUP54/NCBP1/NUP37/RBM26/SMG1/NCBP2                                                                                                                                                    |
| <b>Up lcSSc</b>   | GO:1901990 | regulation of mitotic cell cycle phase transition                   | 42/824 | 444/18670 | 2.96E-06 | 0.000931009 | TTK/KNTC1/CDC20/SLFN11/CEP192/PCID2/ANAPC4/FAM107A/CDK1/CNOT6/NBN/CEP78/DONSON/PCNA/NDC80/PSMA3/GEN1/SFI1/CENPE/PSMD14/KIF14/PSME4/PCBP4/CDK5RAP3/CDC45/WNT10B/CNOT11/CDC26/PCM1/UBD/CDC45/CEP72/CNOT11/E2F7/CENPJ/VPS4B/BUB3/PKIA/TMOD3/ORC1/TUBG1/HYAL1                     |
| <b>Up lcSSc</b>   | GO:0007051 | spindle organization                                                | 22/824 | 170/18670 | 6.02E-06 | 0.001514295 | TTK/CDC20/BIRC5/CEP192/ASPM/CLASP2/NEK7/GPSM2/KIFC1/NDC80/CENPE/MYBL2/CEP72/KNSTRN/CLTC/KIF11/VPS4B/TUBGCP5/SAC3D1/SPAG5/TUBG1/KIF23                                                                                                                                          |
| <b>Up lcSSc</b>   | GO:0071427 | mRNA-containing ribonucleoprotein complex export from nucleus       | 17/824 | 111/18670 | 7.18E-06 | 0.001612556 | CPSF2/NUP107/NUP160/NUP205/SEH1L/AGFG1/SRSF11/PCID2/DHX38/THOC1/NUP133/NUP188/NUP54/NCBP1/NUP37/SMG1/NCBP2                                                                                                                                                                    |
| <b>Up lcSSc</b>   | GO:0071166 | ribonucleoprotein complex localization                              | 18/824 | 128/18670 | 1.32E-05 | 0.002488175 | CPSF2/NUP107/NUP160/NUP205/SEH1L/AGFG1/SRSF11/PCID2/DHX38/THOC1/NUP133/NUP188/TSC1/NUP54/NCBP1/NUP37/SMG1/NCBP2                                                                                                                                                               |
| <b>Up lcSSc</b>   | GO:0051321 | meiotic cell cycle                                                  | 27/824 | 249/18670 | 1.60E-05 | 0.002702056 | TTK/RMI1/HORMAD1/CDC20/ASPM/FANCM/FANCD2/FIGNL1/NBN/BRIP1/PRKACB/TOP2A/NPPC/SMC4/SYCP2/C11orf80/RAD51/WNT4/CNTD1/SMC2/PTTG2/NSUN2/BUB3/TUBGCP5/MEI1/RAD54L/TUBG1                                                                                                              |
| <b>Up lcSSc</b>   | GO:0033044 | regulation of chromosome organization                               | 33/824 | 342/18670 | 2.25E-05 | 0.00366235  | TTK/CTR9/CDC20/PCID2/ANAPC4/ATAD2/TRIP12/NEK7/NBN/PYGO2/NDC80/TOP2A/TCP1/GEN1/CENPE/ATR/ZMPSTE24/CDC45/FMR1/MKI67/CDC26/CDC45/RNF20/DHX36/PTTG2/CCT2/BUB3/ZNF451/PRKD1/OGT/SMG1/EXOSC10/LRRK2                                                                                 |
| <b>Up lcSSc</b>   | GO:0007093 | mitotic cell cycle checkpoint                                       | 20/824 | 165/18670 | 4.12E-05 | 0.005885022 | TTK/KNTC1/CDC20/PCID2/CDK1/CNOT6/NBN/DONSON/PCNA/NDC80/TOP2A/MSH2/GEN1/PCBP4/CDK5RAP3/CNOT11/CNOT1/E2F7/BUB3/ORC1                                                                                                                                                             |
| <b>Up lcSSc</b>   | GO:0000077 | DNA damage checkpoint                                               | 18/824 | 145/18670 | 7.19E-05 | 0.009383219 | MAPK14/CDK1/CNOT6/NBN/BRIP1/DONSON/PCNA/THOC1/MSH2/ATR/PCBP4/CDK5RAP3/WDR76/TIPRL/CNOT11/CNOT1/E2F7/INTS7                                                                                                                                                                     |
| <b>Up lcSSc</b>   | GO:0140013 | meiotic nuclear division                                            | 20/824 | 172/18670 | 7.44E-05 | 0.009383219 | TTK/RMI1/HORMAD1/CDC20/ASPM/FANCM/FANCD2/FIGNL1/BRIP1/TOP2A/SMC4/SYCP2/C11orf80/RAD51/WNT4/CNTD1/SMC2/PTTG2/MEI1/RAD54L                                                                                                                                                       |
| <b>Up lcSSc</b>   | GO:0044766 | multi-organism transport                                            | 12/824 | 73/18670  | 7.76E-05 | 0.009383219 | NUP107/NUP160/NUP205/SEH1L/TCP1/THOC1/NUP133/NUP188/KPNA1/FMR1/NUP54/NUP37                                                                                                                                                                                                    |
| <b>Up lcSSc</b>   | GO:1902579 | multi-organism localization                                         | 12/824 | 73/18670  | 7.76E-05 | 0.009383219 | NUP107/NUP160/NUP205/SEH1L/TCP1/THOC1/NUP133/NUP188/KPNA1/FMR1/NUP54/NUP37                                                                                                                                                                                                    |
| <b>Down lcSSc</b> | GO:0019080 | viral gene expression                                               | 39/655 | 191/18670 | 2.80E-19 | 1.19E-15    | EIF3G/RPL29/RPL13A/RPL6/USF2/TRIM8/RPL3/RPS9/RPL35/RPL11/RPL14/RPL19/EIF3D/EIF2D/RPL8/RPL4/RPL7A/NELFE/RSF1/RPL13/POLR21/CCL4/RPL36/POLR2E/FURIN/RPL24/RPL15/RPS15/SUPT4H1/RPL18A/RPL1/RPL35A/CCL5/RPL18/CCNT1/RPS19/PCBP2/RPS8/POLR2L                                        |
| <b>Down lcSSc</b> | GO:0006413 | translational initiation                                            | 36/655 | 193/18670 | 1.46E-16 | 3.09E-13    | EIF3G/EIF3/RPL29/RPL13A/RPL6/RPL3/RPS9/ATF4/RPL35/RPL11/RPL14/KHDRBS1/RPL19/EIF3D/EIF4H/EIF1/EIF2D/RPL8/RPL4/RPL7A/PABPC1/RPL13/EIF3H/RPL36/EIF3K/RPL24/RPL15/RPS15/RPL18A/RPL1/RPL35A/CCL5/RPL18/EIF4B/RPS19/RPS8                                                            |
| <b>Down lcSSc</b> | GO:0019083 | viral transcription                                                 | 34/655 | 177/18670 | 4.07E-16 | 5.75E-13    | RPL29/RPL13A/RPL6/USF2/TRIM8/RPL3/RPS9/RPL35/RPL11/RPL14/RPL19/RPL8/RPL4/RPL7A/NELFE/RSF1/RPL13/POLR21/CCL4/RPL36/POLR2E/RPL24/RPL15/RPS15/SUPT4H1/RPL18A/RPL1/RPL35A/CCL5/RPL18/CCNT1/RPS19/RPS8/POLR2L                                                                      |
| <b>Down lcSSc</b> | GO:0006614 | SRP-dependent cotranslational protein targeting to membrane         | 23/655 | 105/18670 | 1.39E-12 | 1.18E-09    | RPL29/RPL13A/RPL6/RPL3/RPS9/RPL35/RPL11/RPL14/RPL19/RPL8/RPL4/RPL7A/RPL13/RPL36/RPL24/RPL15/RPS15/RPL18A/RPL1/RPL35A/RPL18/RPS19/RPS8                                                                                                                                         |
| <b>Down lcSSc</b> | GO:0000184 | nuclear-transcribed mRNA catabolic process, nonsense-mediated decay | 24/655 | 120/18670 | 3.66E-12 | 1.94E-09    | RPL29/RPL13A/RPL6/RPL3/RPS9/RPL35/RPL11/RPL14/RPL19/RPL8/RPL4/RPL7A/PABPC1/RPL13/RPL36/RPL24/RPL15/RPS15/RPL18A/RPL1/RPL35A/RPL18/RPS19/RPS8                                                                                                                                  |
| <b>Down lcSSc</b> | GO:0072599 | establishment of protein localization to endoplasmic reticulum      | 24/655 | 122/18670 | 5.32E-12 | 2.51E-09    | RPL29/RPL13A/RPL6/RPL3/RPS9/RPL35/RPL11/RPL14/RPL19/RPL8/RPL4/RPL7A/RPL13/RPL36/RPL24/RPL15/RPS15/RPL18A/RPL1/RPL35A/RPL18/RPS19/RPS8                                                                                                                                         |
| <b>Down lcSSc</b> | GO:0042273 | ribosomal large subunit biogenesis                                  | 16/655 | 71/18670  | 2.33E-09 | 7.08E-07    | RSL1D1/RPL6/RPL3/MRPL11/RPL35/RPL11/RPL14/RSL24D1/RPL7A/NLE1/ZNHIT3/BRIX1/RPL24/NHP2/RPL35A/GTF3A                                                                                                                                                                             |

|               |            |                                                                                      |        |           |             |             |                                                                                                                                                                                                                            |
|---------------|------------|--------------------------------------------------------------------------------------|--------|-----------|-------------|-------------|----------------------------------------------------------------------------------------------------------------------------------------------------------------------------------------------------------------------------|
| Down<br>lcSSc | GO:0042255 | ribosome assembly                                                                    | 14/655 | 63/18670  | 2.84E-08    | 6.35E-06    | RPL6/RPL3/MRPL11/RPL11/RSL24D1/MRPS11/NLE1/BRIX1/RPL24/C1QBP/RPS15/SBDS/ABT1/RPS19                                                                                                                                         |
| Down<br>lcSSc | GO:0071826 | ribonucleoprotein complex subunit organization                                       | 29/655 | 291/18670 | 4.63E-07    | 9.36E-05    | EIF3G/EIF3I/RPL13A/RPL6/RPL3/MRPL11/RPL11/EIF3D/EIF4H/EIF2D/RSL24D1/MRPS11/SNRPD2/NLE1/EIF3H/ZNHIT3/BRIX1/EIF3K/RUVBL2/RPL24/USP39/C1QBP/RPS15/PRPF18/SART1/SBDS/ABT1/EIF4B/RPS19                                          |
| Down<br>lcSSc | GO:0000377 | RNA splicing, via transesterification reactions with bulged adenosine as nucleophile | 34/655 | 379/18670 | 5.80E-07    | 0.000107062 | YBX1/HNRNPA0/PCBP1/KHDRBS1/SNRPA/RBM15B/LSM7/SF3B2/SYF2/PABPC1/PQBP1/SNRPD2/POLR2I/NSRP1/POLR2E/HNRNPUL1/USP39/ALYREF/SCNM1/HNRNPL/SF3B5/C1QBP/CDK13/PRPF18/SART1/HNRNPM/SNRPN/PCBP2/METTL6/PPIL3/ZMAT2/POLR2L/SNIP1/PRDX6 |
| Down<br>lcSSc | GO:0000398 | mRNA splicing, via spliceosome                                                       | 34/655 | 379/18670 | 5.80E-07    | 0.000107062 | YBX1/HNRNPA0/PCBP1/KHDRBS1/SNRPA/RBM15B/LSM7/SF3B2/SYF2/PABPC1/PQBP1/SNRPD2/POLR2I/NSRP1/POLR2E/HNRNPUL1/USP39/ALYREF/SCNM1/HNRNPL/SF3B5/C1QBP/CDK13/PRPF18/SART1/HNRNPM/SNRPN/PCBP2/METTL6/PPIL3/ZMAT2/POLR2L/SNIP1/PRDX6 |
| Down<br>lcSSc | GO:0006119 | oxidative phosphorylation                                                            | 16/655 | 145/18670 | 5.09E-05    | 0.007197812 | SURF1/NDUFA2/UQCRC1/NDUFB10/CYC1/COX5A/UQCRCF51/PPIF/COX6A1/SLC25A33/NDUFB7/NDUFS7/NDUFS8/NDUFA6/CHCHD10/NDUFA1                                                                                                            |
| Down<br>lcSSc | GO:0006098 | pentose-phosphate shunt                                                              | 5/655  | 15/18670  | 0.000117276 | 0.015245683 | PGLS/PGAM1/RBKS/PGM2/TKT                                                                                                                                                                                                   |
| Down<br>lcSSc | GO:0033238 | regulation of cellular amine metabolic process                                       | 11/655 | 81/18670  | 0.000118574 | 0.015245683 | COMT/OAZ1/ODC1/ITGB2/PSMB7/PSMD4/PSMD8/PSMC5/PSMB2/OAZ3/PNKD                                                                                                                                                               |
| Down<br>lcSSc | GO:0042119 | neutrophil activation                                                                | 34/655 | 498/18670 | 0.000178416 | 0.019838415 | SYNGR1/ALAD/LILRA2/EEF2/RAP2B/FOLR3/ITGB2/PSMB7/PTPN6/PGRMC1/HLA-H/GLIPR1/PGAM1/BCR/FTH1/GMFG/PLAUR/PGM2/DDOST/ACAA1/ARL8A/ACTR1B/IMPDH1/CDK13/PDAP1/MAN2B1/DOCK2/PECAM1/CTSZ/CCL5/PLAU/GHDC/COTL1/PRDX6                   |
| Down<br>lcSSc | GO:0051156 | glucose 6-phosphate metabolic process                                                | 6/655  | 25/18670  | 0.000182347 | 0.019838415 | PGLS/PGAM1/RBKS/PGM2/TKT/G6PC3                                                                                                                                                                                             |
| Down<br>lcSSc | GO:0001836 | release of cytochrome c from mitochondria                                            | 9/655  | 59/18670  | 0.000199443 | 0.021155956 | GPX1/BAD/PLAUR/TIMM50/PPIF/PMAIP1/FIS1/BMF/CHCHD10                                                                                                                                                                         |
| Down<br>lcSSc | GO:0022904 | respiratory electron transport chain                                                 | 13/655 | 117/18670 | 0.000235604 | 0.024382183 | NDUFA2/UQCRC1/NDUFB10/CYC1/COX5A/SDHB/UQCRCF51/COX6A1/NDUFB7/NDUFS7/NDUFS8/NDUFA6/NDUFA1                                                                                                                                   |
| Down<br>lcSSc | GO:0002283 | neutrophil activation involved in immune response                                    | 33/655 | 488/18670 | 0.000263084 | 0.026577717 | SYNGR1/ALAD/LILRA2/EEF2/RAP2B/FOLR3/ITGB2/PSMB7/PTPN6/PGRMC1/HLA-H/GLIPR1/PGAM1/BCR/FTH1/GMFG/PLAUR/PGM2/DDOST/ACAA1/ARL8A/ACTR1B/IMPDH1/CDK13/PDAP1/MAN2B1/DOCK2/PECAM1/CTSZ/PLAU/GHDC/COTL1/PRDX6                        |
| Down<br>lcSSc | GO:0070126 | mitochondrial translational termination                                              | 11/655 | 89/18670  | 0.00027734  | 0.027366409 | MRPL28/AURKAI1/MRPL11/MRPL55/MRPS11/MRPL34/MTRF1L/MRPS34/OXA1L/MRPL4/MRPL16                                                                                                                                                |
| Up<br>ncSSc   | GO:0042113 | B cell activation                                                                    | 24/517 | 310/18670 | 6.27E-06    | 0.028037426 | MIR17HG/PCID2/TNFRSF4/SWAP70/THOC1/IL6/HSPD1/RBP1/CHRN2/CD19/PAWR/MS4A1/IGHV3-33/TNFRSF13C/MALT1/IGHV2-70/FCRL1/CXCR5/FZD9/CD180/NBN/CD79B/PPP2R3C/IGHV3-11                                                                |
| Up<br>ncSSc   | GO:0044766 | multi-organism transport                                                             | 10/517 | 73/18670  | 3.16E-05    | 0.041913325 | TSG101/NUP107/CAV1/THOC1/SEH1L/RANBP2/NUP54/VPS37B/FMR1/NUP88                                                                                                                                                              |
| Up<br>ncSSc   | GO:1902579 | multi-organism localization                                                          | 10/517 | 73/18670  | 3.16E-05    | 0.041913325 | TSG101/NUP107/CAV1/THOC1/SEH1L/RANBP2/NUP54/VPS37B/FMR1/NUP88                                                                                                                                                              |
| Up<br>ncSSc   | GO:0046794 | transport of virus                                                                   | 9/517  | 60/18670  | 3.76E-05    | 0.041913325 | TSG101/NUP107/CAV1/SEH1L/RANBP2/NUP54/VPS37B/FMR1/NUP88                                                                                                                                                                    |
| Up<br>ncSSc   | GO:0019058 | viral life cycle                                                                     | 23/517 | 328/18670 | 4.69E-05    | 0.041913325 | TSG101/ZNF502/NUP107/TNFRSF4/RAB1A/CAV1/DDX5/SEH1L/SLC10A1/RANBP2/EFNB2/NUP54/RNASEL/VPS37B/ITGAV/LAMTOR5/TOP2A/FMR1/MIR221/CD86/C HMP7/SLPI/NUP88                                                                         |
| Up<br>ncSSc   | GO:0015682 | ferric iron transport                                                                | 7/517  | 38/18670  | 7.18E-05    | 0.044980462 | TF/ATP6V1C1/ATP6V1E1/STEAP4/CLTC/ATP6V1D/ATP6V1A                                                                                                                                                                           |
| Up<br>ncSSc   | GO:0072512 | trivalent inorganic cation transport                                                 | 7/517  | 38/18670  | 7.18E-05    | 0.044980462 | TF/ATP6V1C1/ATP6V1E1/STEAP4/CLTC/ATP6V1D/ATP6V1A                                                                                                                                                                           |
| Up<br>ncSSc   | GO:0000070 | mitotic sister chromatid segregation                                                 | 14/517 | 151/18670 | 8.04E-05    | 0.044980462 | SPAG5/PCID2/CDC45/SEH1L/ANAPC4/KIFC1/DLGA5/KIF23/CENPK/CDC26/KIF18B/CENPE/CHMP7/TTN                                                                                                                                        |
| Up<br>ncSSc   | GO:0051249 | regulation of lymphocyte activation                                                  | 29/517 | 485/18670 | 9.29E-05    | 0.045390335 | PTPN22/MIR17HG/ZBTB16/PCID2/TNFRSF4/CAV1/PLA2G2F/THOC1/IL6/CD24/SOCS1/HSPD1/CHRN2/CD19/PAWR/TNFRSF18/IGHV3-33/EFNB2/TNFRSF13C/MALT1/IGHV2-70/AP1G1/DLG1/HES1/LAG3/HAVCR2/CD86/PPP2R3C/IGHV3-11                             |
| Up<br>ncSSc   | GO:0006607 | NLS-bearing protein import into nucleus                                              | 5/517  | 18/18670  | 0.000101476 | 0.045390335 | RGPD3/CBLB/RANBP2/NUP54/RGPD2                                                                                                                                                                                              |
| Down<br>ncSSc | GO:0019080 | viral gene expression                                                                | 25/421 | 191/18670 | 1.42E-12    | 3.50E-09    | CCL5/RPL14/RPL13A/TRIM8/RPL35/RPS15/RPL28/RPL29/RPL6/RPL3/RPL36/RPS19/RPL18A/EIF3G/RPL19/TRIM11/RPL1/RPL4/USF2/RPS9/RPL18/REST/RPL35A/RPL10A/TRIM62                                                                        |
| Down<br>ncSSc | GO:0019083 | viral transcription                                                                  | 24/421 | 177/18670 | 1.85E-12    | 3.50E-09    | CCL5/RPL14/RPL13A/TRIM8/RPL35/RPS15/RPL28/RPL29/RPL6/RPL3/RPL36/RPS19/RPL18A/RPL19/TRIM11/RPL1/RPL4/USF2/RPS9/RPL18/REST/RPL35A/RPL10A/T RIM62                                                                             |
| Down<br>ncSSc | GO:0045047 | protein targeting to ER                                                              | 19/421 | 118/18670 | 1.82E-11    | 1.99E-08    | RPL14/RPL13A/RPL35/RPS15/RPL28/RPL29/RPL6/RPL3/RPL36/RPS19/RPL18A/RPL19/PMM1/RPL1/RPL4/RPS9/RPL18/RPL35A/RPL10A                                                                                                            |
| Down<br>ncSSc | GO:0006614 | SRP-dependent cotranslational protein targeting to membrane                          | 18/421 | 105/18670 | 2.10E-11    | 1.99E-08    | RPL14/RPL13A/RPL35/RPS15/RPL28/RPL29/RPL6/RPL3/RPL36/RPS19/RPL18A/RPL19/RPL1/RPL4/RPS9/RPL18/RPL35A/RPL10A                                                                                                                 |
| Down<br>ncSSc | GO:0072599 | establishment of protein localization to endoplasmic reticulum                       | 19/421 | 122/18670 | 3.33E-11    | 2.10E-08    | RPL14/RPL13A/RPL35/RPS15/RPL28/RPL29/RPL6/RPL3/RPL36/RPS19/RPL18A/RPL19/PMM1/RPL1/RPL4/RPS9/RPL18/RPL35A/RPL10A                                                                                                            |
| Down<br>ncSSc | GO:0006413 | translational initiation                                                             | 23/421 | 193/18670 | 7.90E-11    | 3.73E-08    | NCK2/CCL5/RPL14/RPL13A/RPL35/RPS15/RPL28/RPL29/RPL6/RPL3/RPL36/RPS19/RPL18A/KHDRBS1/EIF3G/RPL19/RPL1/RPL4/RPS9/DHX33/RPL18/RPL35A/RPL10A                                                                                   |
| Down<br>ncSSc | GO:0000184 | nuclear-transcribed mRNA catabolic process, nonsense-mediated decay                  | 18/421 | 120/18670 | 2.09E-10    | 8.78E-08    | RPL14/RPL13A/RPL35/RPS15/RPL28/RPL29/RPL6/RPL3/RPL36/RPS19/RPL18A/RPL19/RPL1/RPL4/RPS9/RPL18/RPL35A/RPL10A                                                                                                                 |
| Down<br>ncSSc | GO:0030168 | platelet activation                                                                  | 15/421 | 153/18670 | 2.01E-06    | 0.000543591 | DMTN/SH2B3/VWF/GNAS/SELP/GP1BA/GP6/APOE/ALOX12/FYN/TREM1/CSR1/ITGA2B/GNG2/TLN1                                                                                                                                             |
| Down<br>ncSSc | GO:0034109 | homotypic cell-cell adhesion                                                         | 9/421  | 81/18670  | 8.60E-05    | 0.017107301 | DMTN/SH2B3/CCL5/GNAS/GP1BA/ALOX12/CSR1/ITGA2B/TLN1                                                                                                                                                                         |
| Down<br>ncSSc | GO:0032897 | negative regulation of viral transcription                                           | 5/421  | 24/18670  | 0.000169829 | 0.03209776  | CCL5/TRIM8/TRIM11/REST/TRIM62                                                                                                                                                                                              |
