# Supplementary figures and images for: Nuclear Receptor Subfamily 4A Signaling as a Key Disease Pathway of CD1c+ Dendritic Cell Dysregulation in Systemic Sclerosis
Source: PubMed Central journal article supplement — Arthritis Rheumatol. 2022 Dec 8;75(2):279–92. doi: 10.1002/art.42319 (PMC10108054; doi:10.1002/art.42319), 2022-12-08

N4A1 medium

NR4A1 R848

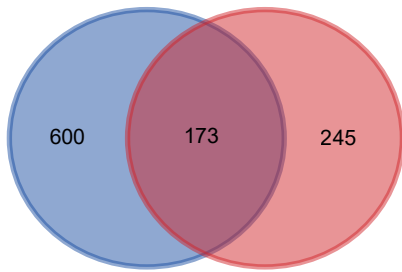

N4A2 medium

NR4A2 R848

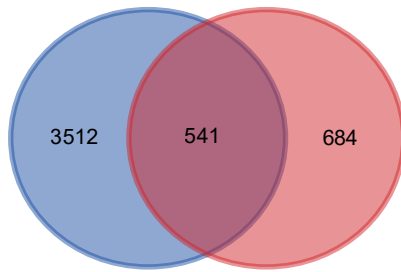

N4A3 medium

NR4A3 R848

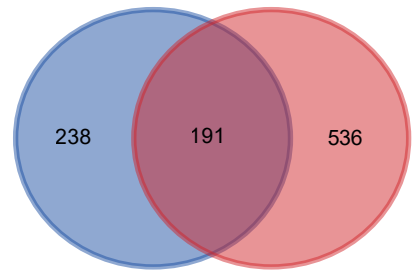

Supplement: ART-75-279-s004.pdf [file ART-75-279-s004.pdf]

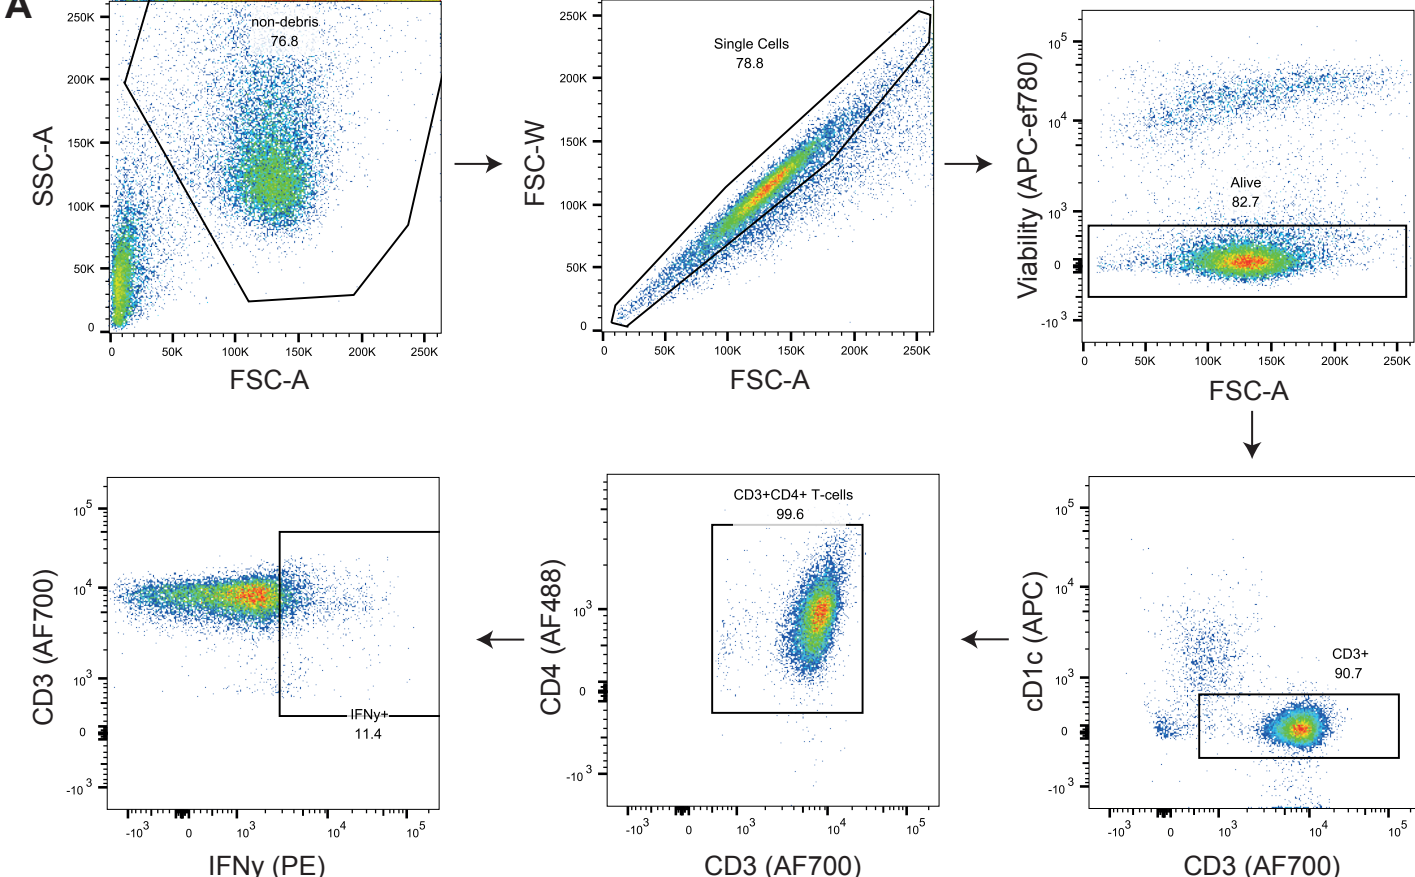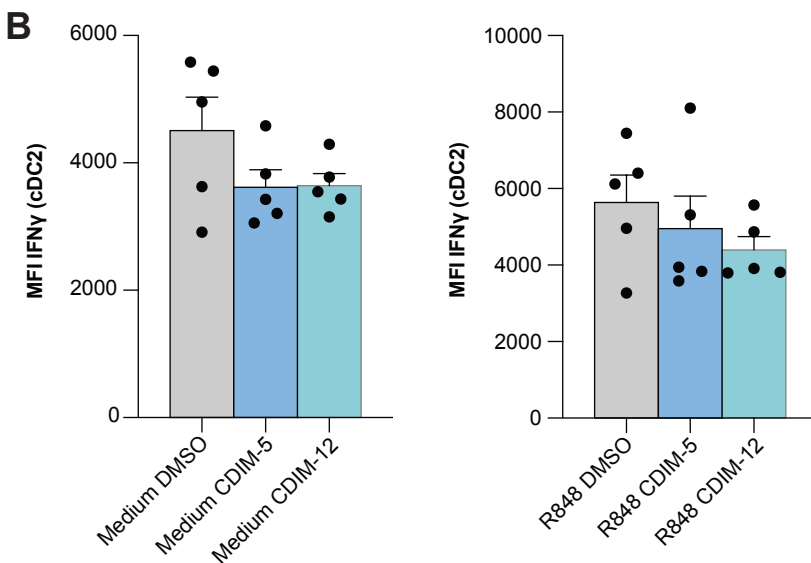

Supplement: ART-75-279-s005.pdf [file ART-75-279-s005.pdf]

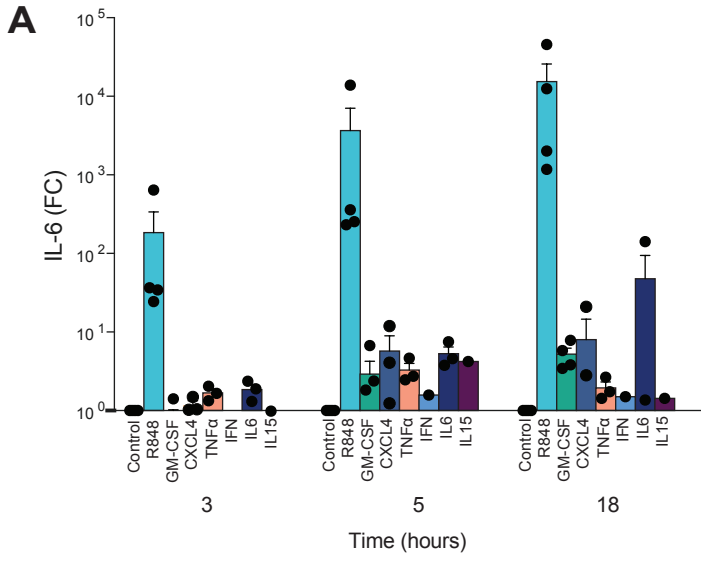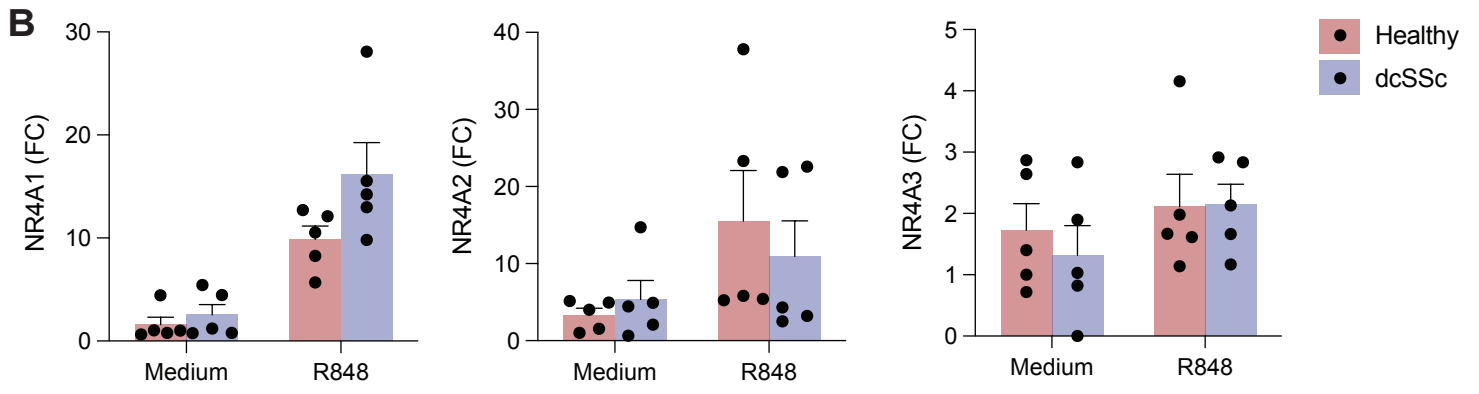

Supplement: ART-75-279-s008.pdf [file ART-75-279-s008.pdf]

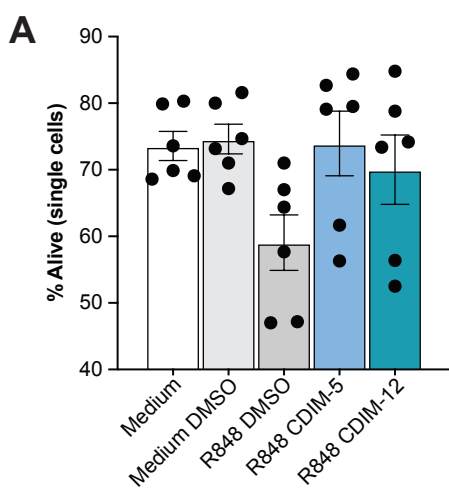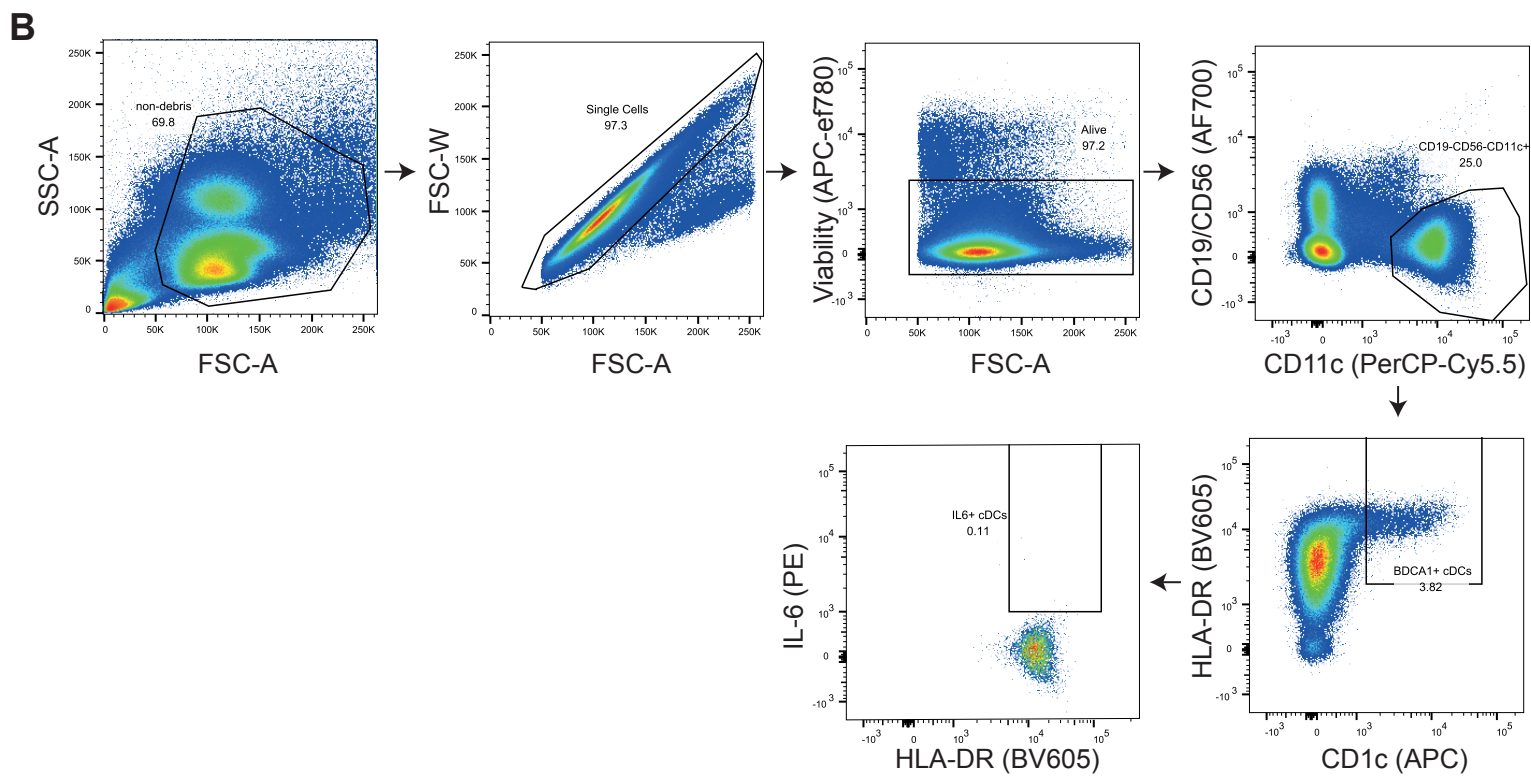

Supplement: ART-75-279-s010.pdf [file ART-75-279-s010.pdf]
